# Supplementary material for: HOXB8 Counteracts MAPK/ERK Oncogenic Signaling in a Chicken Embryo Model of Neoplasia
Source: MDPI journal article supplement (doi:10.3390/ijms22168911), 2021-08-18
Supplement: s1 [file s1]

**Table S3:** Commonly differentially regulated genes between MEK1+HOXB8 vs MEK1ca and pCIG vs MEK1ca

(False Discovery Rate (padj) <= 0.01). Genes that are inversely regulated are highlighted.

| ID                 | pCIG vs MEK1ca, Log2FC | MEK1ca+HOXB8 vs MEK1ca, Log2FC | Symbol      |
|--------------------|------------------------|--------------------------------|-------------|
| ENSGALG00000016783 | 6,569509059            | -5,301446621                   | IL1R1       |
| ENSGALG00000026862 | 4,954899999            | -0,764882325                   | CLDN1       |
| ENSGALG00000013624 | 4,748606334            | -3,6799039                     | FAM65B      |
| ENSGALG00000007701 | 4,453082303            | -2,906313035                   | B3GNT7      |
| ENSGALG00000023406 | 4,424329106            | -1,774894708                   |             |
| ENSGALG00000004221 | 4,334100391            | -5,338632777                   | IL22RA1     |
| ENSGALG00000016431 | 4,191515764            | -4,37340061                    | PAX5        |
| ENSGALG00000006421 | 4,186231336            | -3,742853665                   | SLC16A12    |
| ENSGALG00000014994 | 4,160137851            | -5,043766073                   | CRHBP       |
| ENSGALG00000016145 | 3,924548833            | -2,754137035                   | RIPK4       |
| ENSGALG00000016906 | 3,743251462            | -1,870006943                   | SPRY2       |
| ENSGALG00000020359 | 3,572883143            | -3,821393345                   | SIX6        |
| ENSGALG00000023379 | 3,494464883            | -3,949811074                   | F2RL2       |
| ENSGALG00000010435 | 3,471549614            | -2,340611141                   | RASGRP3     |
| ENSGALG00000007656 | 3,445291545            | -2,823200316                   |             |
| ENSGALG00000005519 | 3,391598976            | -1,767947956                   | TLL2        |
| ENSGALG00000026663 | 3,38430006             | -2,478656591                   |             |
| ENSGALG00000002562 | 3,3452383              | -3,12939254                    | ARAP3       |
| ENSGALG00000008905 | 3,342984543            | -2,456637668                   | HABP2       |
| ENSGALG00000016784 | 3,229015878            | -2,607549769                   | IL1RL2      |
| ENSGALG00000008581 | 3,209755496            | -2,566439645                   | DUSP5       |
| ENSGALG00000011099 | 3,19842177             | -2,760215905                   | FAP         |
| ENSGALG00000003456 | 3,130034846            | -3,934712358                   | CA12        |
| ENSGALG00000015358 | 3,121559149            | -3,063209848                   | MYH15       |
| ENSGALG00000011940 | 2,983749675            | -1,496267605                   | CCK         |
| ENSGALG00000007963 | 2,963911322            | -1,84239576                    | NFATC2      |
| ENSGALG00000023521 | 2,942428455            | -1,651708778                   | ADRA2A      |
| ENSGALG00000007171 | 2,91119837             | -1,518198388                   | CIITA       |
| ENSGALG00000005000 | 2,843605103            | -2,158647655                   | COMTD1      |
| ENSGALG00000000600 | 2,828234018            | -2,27272638                    | PTPN7       |
| ENSGALG00000012018 | 2,812280515            | -1,435600968                   | UGT8        |
| ENSGALG00000000177 | 2,765911854            | -1,083701806                   | KLF3        |
| ENSGALG00000007346 | 2,763402401            | -2,361764382                   | KIAA1462    |
| ENSGALG00000001621 | 2,731716978            | -1,495017381                   | CLDN5       |
| ENSGALG00000010224 | 2,688243072            | -2,486198557                   | GLIPR1L     |
| ENSGALG00000009704 | 2,653508455            | -2,934403789                   | CHST15      |
| ENSGALG00000005209 | 2,631256548            | -2,791291062                   | RP5-877J2.1 |
| ENSGALG00000014984 | 2,599579307            | -2,931476354                   | F2RL1       |
| ENSGALG00000022962 | 2,592879602            | -3,362304357                   | OVST        |
| ENSGALG00000002183 | 2,571301428            | -2,438499895                   | PRR16       |
| ENSGALG00000015388 | 2,539489467            | -1,507384513                   | PRDM1       |
| ENSGALG00000016140 | 2,527534269            | -2,998033733                   | FAM3B       |
| ENSGALG00000013102 | 2,517151592            | -1,724325032                   | COBL        |
| ENSGALG00000005855 | 2,515154305            | -1,488520056                   | CA5B        |
| ENSGALG00000002816 | 2,498779812            | -2,170634895                   | STK10       |
| ENSGALG00000026258 | 2,487122645            | -0,909500707                   |             |
| ENSGALG00000003126 | 2,475370264            | -1,615974863                   | ERBB4       |
| ENSGALG00000002540 | 2,44573463             | -2,132167559                   | RGS2        |
| ENSGALG00000015826 | 2,399148661            | -2,484029553                   | HTR1E       |
| ENSGALG00000007538 | 2,386772965            | -3,275953369                   | IRG1L       |
| ENSGALG00000019054 | 2,38528849             | -1,427749976                   | NAALAD2     |
| ENSGALG00000026366 | 2,348234721            | -1,956428809                   | TTN         |
| ENSGALG00000004306 | 2,335846949            | -1,830041848                   | SYT12       |
| ENSGALG00000009393 | 2,335695464            | -0,782303357                   | CAV1        |
| ENSGALG00000007657 | 2,332413704            | -2,412172788                   | CDX4        |
| ENSGALG00000017091 | 2,329587636            | -2,363903034                   | FLT1        |
| ENSGALG00000011562 | 2,318757284            | -2,817896047                   | PARK2       |
| ENSGALG00000012051 | 2,272220282            | -2,878544854                   | STAC        |

|                    |             |              |          |
|--------------------|-------------|--------------|----------|
| ENSGALG00000011207 | 2,267210819 | -1,434035643 | DUSP6    |
| ENSGALG00000010036 | 2,253052375 | -0,717787007 | FOSL2    |
| ENSGALG00000000949 | 2,249487158 | -1,013784064 | HBEGF    |
| ENSGALG00000004376 | 2,243095428 | -2,323750078 | KCNJ2    |
| ENSGALG00000014159 | 2,234266769 | -1,81424576  | PACSIN2  |
| ENSGALG00000017244 | 2,226234853 | -2,189436741 | PRSS23   |
| ENSGALG00000007786 | 2,190066734 | -1,895122662 | DOK5     |
| ENSGALG00000017242 | 2,189728881 | -1,579394776 | FZD4     |
| ENSGALG00000005061 | 2,1754071   | -2,114741441 | PPM1E    |
| ENSGALG00000003437 | 2,148196892 | -1,896224168 | ADAM8    |
| ENSGALG00000005499 | 2,068323361 | -1,531899327 | IL17RD   |
| ENSGALG00000006995 | 2,052973523 | -1,759714805 | APOD     |
| ENSGALG00000004594 | 2,028493881 | -0,774792529 | CD74     |
| ENSGALG00000006112 | 2,027013529 | -2,692857061 | SCN5A    |
| ENSGALG00000025941 | 1,970690155 | -2,032822244 | RGS20    |
| ENSGALG00000012732 | 1,970234077 | -2,298252682 | PHACTR1  |
| ENSGALG00000017179 | 1,969058193 | -1,548130217 | PDGFD    |
| ENSGALG00000007940 | 1,939184933 | -2,542363859 | RAG2     |
| ENSGALG00000011833 | 1,93191024  | -0,971207285 | SPATA5   |
| ENSGALG00000003323 | 1,918109692 | -1,591926379 | OSGIN1   |
| ENSGALG00000012635 | 1,911001153 | -1,755097361 | BTBD11   |
| ENSGALG00000022490 | 1,907440028 | -0,638026939 | ARPC1B   |
| ENSGALG00000008461 | 1,900360149 | 0,900341356  | HGF      |
| ENSGALG00000007415 | 1,899486225 | 0,938743099  | SH3RF2   |
| ENSGALG00000000544 | 1,895252672 | 1,877518925  |          |
| ENSGALG00000016785 | 1,892879929 | -2,405348378 | IL1RL1   |
| ENSGALG00000005498 | 1,873960213 | -1,707286081 |          |
| ENSGALG00000008353 | 1,848707427 | -1,679225856 | MAGI2    |
| ENSGALG00000010597 | 1,8345583   | -0,973101915 | CRIM1    |
| ENSGALG00000012106 | 1,828065766 | -2,236831516 | SCTR     |
| ENSGALG00000000141 | 1,818659764 | -1,223136562 | BLB1     |
| ENSGALG00000026262 | 1,788029436 | -1,4922838   | PMP22    |
| ENSGALG00000010468 | 1,7857319   | -1,6309453   | ISM2     |
| ENSGALG00000003706 | 1,784490953 | -1,390323026 | DUSP1    |
| ENSGALG00000011581 | 1,763989645 | -1,059360643 | KIF26A   |
| ENSGALG00000023241 | 1,749836088 | -0,938819916 |          |
| ENSGALG00000027521 | 1,741041239 | -0,803725098 | ANKRD33B |
| ENSGALG00000012623 | 1,738546704 | -2,482707417 | CFC1B    |
| ENSGALG00000029175 | 1,731471147 | -1,685259625 | EFNB2    |
| ENSGALG00000001560 | 1,726930021 | -2,555527127 | KCNU1    |
| ENSGALG00000024083 | 1,719739442 | -2,175833689 | C8orf4   |
| ENSGALG00000005069 | 1,702946767 | 0,669583836  | PTGS2    |
| ENSGALG00000005689 | 1,702270541 | -2,271345118 | PAX2     |
| ENSGALG00000009693 | 1,692012083 | -1,908196694 | CPXM2    |
| ENSGALG00000015332 | 1,689640626 | -2,044938557 | CPLX1    |
| ENSGALG00000006084 | 1,684603389 | -1,531133293 | WNT8A    |
| ENSGALG00000028250 | 1,684255106 | -2,884651456 | ANKRD22  |
| ENSGALG00000010258 | 1,674285408 | -1,528410178 | LTBP2    |
| ENSGALG00000008281 | 1,659542176 | -1,009962725 | NEURL1   |
| ENSGALG00000013033 | 1,649436663 | -2,410715686 | CMBL     |
| ENSGALG00000009740 | 1,648366239 | -1,063900656 | RASGRP1  |
| ENSGALG00000010910 | 1,643397512 | -0,801671392 | RAPGEF5  |
| ENSGALG00000016602 | 1,632391617 | -1,339565689 | ARHGAP6  |
| ENSGALG00000026989 | 1,621656649 | -0,47543634  |          |
| ENSGALG00000016377 | 1,612690665 | -1,984049771 | PXDN     |
| ENSGALG00000027218 | 1,609222298 | 1,190798556  |          |
| ENSGALG00000008118 | 1,603231134 | -2,340544818 | RFTN2    |
| ENSGALG00000009282 | 1,600131022 | -1,769054515 | ELMSAN1  |
| ENSGALG00000027707 | 1,597314136 | -1,082314729 | ESM1     |
| ENSGALG00000005347 | 1,58404156  | -2,102469906 | ADAMTS18 |
| ENSGALG00000001383 | 1,582310757 | -1,543511015 | HTR4     |
| ENSGALG00000008890 | 1,553993643 | -2,449553325 | ADGRL4   |

|                    |             |              |          |
|--------------------|-------------|--------------|----------|
| ENSGALG00000017714 | 1,553191397 | -1,052113718 | FHAD1    |
| ENSGALG00000011148 | 1,54566024  | -1,754606037 | HHIPL1   |
| ENSGALG00000011962 | 1,540068054 | -0,494326456 | NDNF     |
| ENSGALG00000008875 | 1,539400497 | -1,156831558 | PLCB1    |
| ENSGALG00000001189 | 1,519846307 | 0,851541498  | NCF1     |
| ENSGALG00000016754 | 1,508945346 | -1,034769759 | MGAT4A   |
| ENSGALG00000006997 | 1,507910301 | -1,684979264 | BRINP1   |
| ENSGALG00000019426 | 1,491625247 | -2,280006749 | TMEM71   |
| ENSGALG00000011236 | 1,484958654 | -1,070413941 | BEGAIN   |
| ENSGALG00000002594 | 1,484249601 | -3,661637709 | TFPI     |
| ENSGALG00000014930 | 1,479606742 | -1,696897635 | ENC1     |
| ENSGALG00000010683 | 1,466981653 | -0,919156764 | S1PR3    |
| ENSGALG00000007660 | 1,456310727 | -1,228207524 | CHIC1    |
| ENSGALG00000028130 | 1,44989129  | 1,140619832  | KIAA1644 |
| ENSGALG00000015865 | 1,445378264 | -0,393610955 | FAM46A   |
| ENSGALG00000009667 | 1,442248321 | -1,219318734 | MFAP3L   |
| ENSGALG00000005442 | 1,437319869 | -1,327990169 | PALMD    |
| ENSGALG00000007771 | 1,43708626  | -1,353742442 | FAM210B  |
| ENSGALG00000026790 | 1,433302155 | -0,903869706 | DMRT2    |
| ENSGALG00000027210 | 1,422887936 | -1,142415301 |          |
| ENSGALG00000007218 | 1,41095016  | -1,732428983 | MB21D2   |
| ENSGALG00000012702 | 1,407925441 | -0,483830731 | JARID2   |
| ENSGALG00000009546 | 1,402581457 | -0,832251183 | HTRA1    |
| ENSGALG00000011468 | 1,39801296  | -1,424650779 | IGFBP5   |
| ENSGALG00000015665 | 1,394518864 | -1,188036426 | SH3BP2   |
| ENSGALG00000011680 | 1,389021273 | -0,709602993 | EPHA5    |
| ENSGALG00000011419 | 1,382981881 | -0,529859697 | DUSP4    |
| ENSGALG00000014852 | 1,380781721 | -1,119019515 |          |
| ENSGALG00000010049 | 1,375590195 | -0,6748978   | PTPRB    |
| ENSGALG00000006401 | 1,372021166 | -1,299022844 | OSBPL5   |
| ENSGALG00000002326 | 1,369220123 | -0,593338649 |          |
| ENSGALG00000007846 | 1,3613354   | -0,863598394 |          |
| ENSGALG00000011120 | 1,356774191 | -0,88227849  | SLC4A10  |
| ENSGALG00000004569 | 1,348974691 | -0,82424563  | UNC5B    |
| ENSGALG00000012911 | 1,345449733 | -0,929872331 | SYT10    |
| ENSGALG00000015028 | 1,342064123 | -0,946739996 | RLN1     |
| ENSGALG00000005476 | 1,338834069 | -1,752170936 | PTH1R    |
| ENSGALG00000000107 | 1,334266505 | 1,227291307  | TRIM7.1  |
| ENSGALG00000006258 | 1,330333906 | -0,778635815 | SPOCK1   |
| ENSGALG00000015089 | 1,327665029 | -1,867848339 | GAP43    |
| ENSGALG00000011110 | 1,322132253 | -1,431359085 | DPP4     |
| ENSGALG00000008893 | 1,318238187 | -2,444595373 | SYT4     |
| ENSGALG00000005805 | 1,313014625 | -0,954718819 | PLCD1    |
| ENSGALG00000010311 | 1,29508602  | -0,865329105 | NAV3     |
| ENSGALG00000002993 | 1,293663972 | -1,397301236 | CA10     |
| ENSGALG00000015256 | 1,284509548 | -1,397562325 | PAM      |
| ENSGALG00000015908 | 1,276423655 | -0,970529728 | COL12A1  |
| ENSGALG00000014727 | 1,275557809 | -2,02826974  | PDE4D    |
| ENSGALG00000016817 | 1,2720896   | -0,658902643 | RASA3    |
| ENSGALG00000007253 | 1,27114813  | 1,036667095  | IL1RAP   |
| ENSGALG00000009920 | 1,271106358 | -1,80046145  | COCH     |
| ENSGALG00000002632 | 1,269452785 | -1,220611399 | CALCRL   |
| ENSGALG00000016102 | 1,263113327 | -1,630912312 | CYP26B1  |
| ENSGALG00000001608 | 1,262511696 | -2,081100043 | UNC5D    |
| ENSGALG00000016998 | 1,256730923 | -1,177970615 |          |
| ENSGALG00000011831 | 1,24831638  | -0,347478626 | ANKRD50  |
| ENSGALG00000028047 | 1,243898501 | -1,369008166 | RHOV     |
| ENSGALG00000010010 | 1,237630354 | -0,869227214 | RHOQ     |
| ENSGALG00000009947 | 1,236965236 | -1,358616298 | PLEKHH2  |
| ENSGALG00000014983 | 1,23637443  | -1,39278689  | F2R      |
| ENSGALG00000005619 | 1,235271948 | -1,189698364 | F3       |
| ENSGALG00000015653 | 1,234972794 | -0,655959247 | JPH1     |

|                    |             |              |            |
|--------------------|-------------|--------------|------------|
| ENSGALG00000003114 | 1,234804889 | -1,398035927 | NOG        |
| ENSGALG00000019716 | 1,234170903 | -1,618712644 | KRT20      |
| ENSGALG00000019261 | 1,230099163 | -1,655584971 | ARHGAP8    |
| ENSGALG00000028821 | 1,225133338 | -1,46102831  | GLIPR2     |
| ENSGALG00000008999 | 1,220108565 | 0,583129446  | AFAP1L2    |
| ENSGALG00000014823 | 1,217853522 | -1,422401118 | C6orf58    |
| ENSGALG00000000307 | 1,215832976 | -0,894951246 | CERS4      |
| ENSGALG00000007268 | 1,214609385 | -1,168892699 | CADPS      |
| ENSGALG00000000721 | 1,214440274 | -0,47173717  | SLC41A1    |
| ENSGALG00000026557 | 1,203253046 | -1,412974627 | PGF        |
| ENSGALG00000002555 | 1,202502668 | -0,892902927 | RET        |
| ENSGALG00000027133 | 1,199491369 | -1,405319409 | CD83       |
| ENSGALG00000009360 | 1,196193521 | -0,890830846 | CAPN2      |
| ENSGALG00000014864 | 1,190480858 | -1,150010609 | SMPDL3A    |
| ENSGALG00000012927 | 1,187339616 | -2,419967236 | CDH10      |
| ENSGALG00000016455 | 1,186649639 | -2,034647249 | GREB1      |
| ENSGALG00000011867 | 1,179474298 | -1,242989678 | SERHL2     |
| ENSGALG00000002294 | 1,174006641 | -0,482168758 | SEMA6A     |
| ENSGALG00000002543 | 1,169335598 | -0,840502021 | CSGALNACT2 |
| ENSGALG00000013892 | 1,167370699 | -1,122648268 | MAP3K5     |
| ENSGALG00000011439 | 1,165074777 | -1,116853678 | RBMS3      |
| ENSGALG00000009450 | 1,162765074 | -1,016064164 | DUSP10     |
| ENSGALG00000023768 | 1,155472868 | 0,58136874   | EPHA2      |
| ENSGALG00000016927 | 1,145535192 | -0,715628819 | KLF5       |
| ENSGALG00000006988 | 1,141001037 | 0,944077449  | RNF213     |
| ENSGALG00000012998 | 1,132683468 | -0,849149352 | WNT5B      |
| ENSGALG00000028046 | 1,129369719 | -1,098357134 | INSIG2     |
| ENSGALG00000014866 | 1,123162841 | -1,312013425 | FABP7      |
| ENSGALG00000009567 | 1,119009905 | -1,113206952 | TLL1       |
| ENSGALG00000026970 | 1,11847741  | -0,785311616 |            |
| ENSGALG00000006376 | 1,116147137 | -1,138122247 | TMC3       |
| ENSGALG00000008469 | 1,115125474 | -0,83875822  | SPINT1     |
| ENSGALG00000010692 | 1,111701613 | -0,996294098 | LRP8       |
| ENSGALG00000010081 | 1,110146926 | -0,563235953 | SH3D19     |
| ENSGALG00000006337 | 1,109144959 | -1,128489411 | K123       |
| ENSGALG00000026763 | 1,104647316 | -1,177313255 |            |
| ENSGALG00000009170 | 1,101783321 | -1,581054934 | NCEH1      |
| ENSGALG00000006797 | 1,10056236  | -2,093089949 | ADARB2     |
| ENSGALG00000015980 | 1,100313329 | -0,841274637 |            |
| ENSGALG00000012439 | 1,098736639 | -1,028638845 | IGFBP3     |
| ENSGALG00000026518 | 1,097099741 | -0,773283921 | RUNDC3A    |
| ENSGALG00000028582 | 1,093959706 | 0,832821984  | LMO2       |
| ENSGALG00000002714 | 1,089564948 | -1,839377527 | TMEM132C   |
| ENSGALG00000016875 | 1,086190922 | -1,825016077 | CLYBL      |
| ENSGALG00000005492 | 1,08468259  | -0,609713298 | NBEAL2     |
| ENSGALG00000007113 | 1,078758406 | -1,77145981  | TNC        |
| ENSGALG00000006822 | 1,077915026 | -2,117548167 | PCDH19     |
| ENSGALG00000023581 | 1,073595233 | -0,876769713 |            |
| ENSGALG00000007056 | 1,069890641 | -0,638790551 | KLF6       |
| ENSGALG00000014907 | 1,069885451 | -0,80019622  | DCBLD1     |
| ENSGALG00000006808 | 1,068278734 | -0,948868926 | TSPAN6     |
| ENSGALG00000022871 | 1,067659168 | -1,176605905 | HLA2       |
| ENSGALG00000028708 | 1,054408367 | -0,938854547 |            |
| ENSGALG00000025773 | 1,052013322 | -1,506718569 |            |
| ENSGALG00000001020 | 1,049473012 | -0,780112538 | KIFC3      |
| ENSGALG00000028602 | 1,04212846  | -0,881510014 |            |
| ENSGALG00000012594 | 1,03128421  | -2,283939186 | NTRK2      |
| ENSGALG00000017411 | 1,030664685 | -1,17758282  | RXFP3      |
| ENSGALG00000011609 | 1,027774555 | -1,61436812  | ABTB2      |
| ENSGALG00000009129 | 1,026339944 | -0,878296092 | DLX5       |
| ENSGALG00000004393 | 1,024579421 | -0,962441655 |            |
| ENSGALG00000007646 | 1,023532832 | -1,999886692 |            |



|                    |             |              |          |
|--------------------|-------------|--------------|----------|
| ENSGALG00000016841 | 1,021854986 | -0,576008454 | COL4A1   |
| ENSGALG00000006252 | 1,021389981 | -0,49037706  | LMO4     |
| ENSGALG00000008491 | 1,018906247 | -1,354708919 | XIAP     |
| ENSGALG00000006638 | 1,014405382 | -0,469621749 | GRIK4    |
| ENSGALG00000028294 | 1,012130398 | -0,727698928 | VWA5B2   |
| ENSGALG00000002532 | 1,010182876 | -0,997428466 | GJA4     |
| ENSGALG00000007069 | 1,009530133 | -0,738101541 | ADAMTS17 |
| ENSGALG00000006908 | 1,006453251 | -0,789724754 | DLG1     |
| ENSGALG00000015440 | 1,001448719 | -0,996123586 | RCSD1    |
| ENSGALG00000001419 | 0,999950253 | -0,758492411 | DAB2IP   |
| ENSGALG00000015208 | 0,998078994 | -0,778489641 | ROR2     |
| ENSGALG00000008918 | 0,995278864 | -1,685987772 | LAMP5    |
| ENSGALG00000003149 | 0,985359473 | -0,749443102 | ITPR3    |
| ENSGALG00000020723 | 0,981929794 | -0,913543779 | NOG2     |
| ENSGALG00000016537 | 0,979050265 | -0,739933749 | SCML2    |
| ENSGALG00000027497 | 0,976598532 | -0,973179721 | CFD      |
| ENSGALG00000004930 | 0,975284752 | -1,782009807 | HRH1     |
| ENSGALG00000016143 | 0,975263193 | 0,607480677  | RHPN1    |
| ENSGALG00000010926 | 0,975212806 | -1,152009571 | SPP1     |
| ENSGALG00000012808 | 0,972939427 | -0,789210521 | CDYL     |
| ENSGALG00000003739 | 0,97006222  | -1,237172502 | SALL1    |
| ENSGALG00000014343 | 0,963080504 | -1,412639292 | ARAP2    |
| ENSGALG00000002509 | 0,962423205 | -1,185807324 | COL5A2   |
| ENSGALG00000021879 | 0,950789217 | -1,34129965  |          |
| ENSGALG00000006614 | 0,950175613 | 2,721769719  | TECTA    |
| ENSGALG00000016843 | 0,946578268 | -0,926939677 | COL4A2   |
| ENSGALG00000017135 | 0,945725278 | -1,071209509 | CRYL1    |
| ENSGALG00000012224 | 0,94448356  | -1,20528636  | PDE1C    |
| ENSGALG00000008014 | 0,943508119 | -1,126068911 | CEBPB    |
| ENSGALG00000026892 | 0,943046494 | -1,6734567   |          |
| ENSGALG00000010163 | 0,938977707 | -0,998496131 | LGR5     |
| ENSGALG00000004662 | 0,937959127 | -0,792400882 | DISP3    |
| ENSGALG00000010836 | 0,937907565 | -0,688393097 | AHR      |
| ENSGALG00000002397 | 0,927215999 | -1,291814757 | PSPH     |
| ENSGALG00000010412 | 0,925287079 | -0,756929566 | WWTR1    |
| ENSGALG00000007039 | 0,92399781  | -0,823801989 | IGF1R    |
| ENSGALG00000008778 | 0,923325024 | -0,51039033  | SPRED2   |
| ENSGALG00000010785 | 0,922406238 | -0,818155142 | ACOT11   |
| ENSGALG00000015164 | 0,920081875 | -0,982829392 | PCSK5    |
| ENSGALG00000014855 | 0,916891226 | -0,627700184 | GHR      |
| ENSGALG00000007667 | 0,910790115 | -0,757882718 | GPR158   |
| ENSGALG00000012533 | 0,909053879 | -0,619977689 | MYH9     |
| ENSGALG00000011618 | 0,908730543 | -0,609057453 | ADSSL1   |
| ENSGALG00000015624 | 0,906952704 | -0,97910183  | VCAN     |
| ENSGALG00000001645 | 0,906502233 | -1,608468631 | KCNT1    |
| ENSGALG00000011258 | 0,899386948 | -0,946927699 | ATP2B1   |
| ENSGALG00000016308 | 0,888326042 | -0,690314419 | MYC      |
| ENSGALG00000007952 | 0,887725324 | -0,932963194 | AMOT     |
| ENSGALG00000001281 | 0,886212495 | 1,101845994  | PHOSPHO1 |
| ENSGALG00000010148 | 0,885936489 | -1,379685752 | PTPRR    |
| ENSGALG00000001276 | 0,885240877 | -1,144775826 | HOXB9    |
| ENSGALG00000015896 | 0,883690573 | -1,023057651 | MMP16    |
| ENSGALG00000005256 | 0,880582454 | -0,63393871  | EPHA4    |
| ENSGALG00000009179 | 0,880187457 | -1,119360692 | TNFSF10  |
| ENSGALG00000011172 | 0,879786034 | -1,121518184 | MYO10L   |
| ENSGALG00000027885 | 0,876800098 | -1,151437329 | C4orf19  |
| ENSGALG00000014783 | 0,875888949 | -0,572122303 | PTPRK    |
| ENSGALG00000009405 | 0,875608773 | -1,391691484 | GRIA2    |
| ENSGALG00000006008 | 0,867963452 | 0,882382705  | HOMER2   |
| ENSGALG00000029023 | 0,865902724 | -1,242039059 | DMRTB1   |
| ENSGALG00000016909 | 0,864393738 | -0,488526858 | NDFIP2   |
| ENSGALG00000026582 | 0,863598751 | -0,997100015 | SOX18    |

|                     |             |              |          |
|---------------------|-------------|--------------|----------|
| ENSGALG00000001617  | 0,855845667 | 1,898502237  | CAMKK1   |
| ENSGALG00000015180  | 0,851097646 | -0,540189844 | PSAT1    |
| ENSGALG00000016807  | 0,848101313 | -0,574724846 | LIMS1    |
| ENSGALG00000000977  | 0,842188766 | -1,032464943 | MAPKAP1  |
| ENSGALG000000009530 | 0,841159622 | -1,411853584 | PDZRN4   |
| ENSGALG00000004155  | 0,841077447 | -1,147734088 | MYOM3    |
| ENSGALG00000015409  | 0,837042297 | -0,599227418 | PROS1    |
| ENSGALG00000012278  | 0,835859144 | -2,383840075 | EMCN     |
| ENSGALG00000010156  | 0,833499217 | -1,025083823 | DOCK8    |
| ENSGALG00000001220  | 0,831042878 | -0,818155857 | HERPUD1  |
| ENSGALG00000013085  | 0,830893947 | -0,535478159 | PTPRO    |
| ENSGALG00000025770  | 0,830841194 | -1,089960517 |          |
| ENSGALG00000012354  | 0,829092837 | -0,521764337 | VOPP1    |
| ENSGALG00000000639  | 0,827648848 | -0,79001541  | LRRN2    |
| ENSGALG00000011232  | 0,825691237 | -0,469477808 | STK11IP  |
| ENSGALG00000020899  | 0,823141433 | -0,585391733 |          |
| ENSGALG00000010664  | 0,817672769 | 0,852579615  | KIF26B   |
| ENSGALG000000008670 | 0,815447938 | -0,486758564 | C1orf52  |
| ENSGALG00000013683  | 0,810200928 | -0,780228434 | ARID1B   |
| ENSGALG00000012848  | 0,809997189 | -0,711139877 | KDM7A    |
| ENSGALG00000014872  | 0,806209646 | -2,137267919 | FGF10    |
| ENSGALG00000005430  | 0,79963845  | -0,72235333  | ALS2CL   |
| ENSGALG00000012849  | 0,79670503  | -0,57279907  | SLC37A3  |
| ENSGALG00000002443  | 0,789654091 | -1,353430658 | FBXL16   |
| ENSGALG00000009252  | 0,7810557   | -0,788959505 | PLD1     |
| ENSGALG00000002598  | 0,778822215 | -0,82047281  | TPST1    |
| ENSGALG00000004158  | 0,769428918 | -0,467330867 | GPT2     |
| ENSGALG00000001346  | 0,76776324  | -1,362109597 |          |
| ENSGALG00000013124  | 0,765332021 | -1,026819624 | FHOD3    |
| ENSGALG00000011376  | 0,758366172 | -0,870171475 | ANKRD9   |
| ENSGALG00000001000  | 0,756534693 | -0,924720639 | HSPA5    |
| ENSGALG00000012012  | 0,743046962 | -0,895703636 | CMIP     |
| ENSGALG00000011319  | 0,737544915 | -1,42017882  | LPHN3    |
| ENSGALG00000005512  | 0,736922168 | -0,667653797 | KIAA1671 |
| ENSGALG00000006138  | 0,736205494 | -1,026936244 | HELZ2    |
| ENSGALG00000003043  | 0,734167184 | -0,395518744 | BBS2     |
| ENSGALG00000005653  | 0,729875771 | -0,515161656 | NFKB2    |
| ENSGALG00000007501  | 0,729453053 | -0,702573548 | P2RX3    |
| ENSGALG00000015184  | 0,727266294 | -0,431383947 | TLE4     |
| ENSGALG00000009381  | 0,723727203 | -0,972226453 | SIPA1L1  |
| ENSGALG00000001370  | 0,722550699 | -1,073396904 | ADAMTS8  |
| ENSGALG00000015947  | 0,718924866 | -2,438977585 | CDH17    |
| ENSGALG00000008163  | 0,713636421 | -0,439350797 | PSME4    |
| ENSGALG00000015975  | 0,705892008 | -1,056406602 | DPY19L4  |
| ENSGALG00000015310  | 0,701805821 | -0,587354563 | SOBP     |
| ENSGALG00000002198  | 0,701337674 | -0,485078535 | FHOD1    |
| ENSGALG00000010522  | 0,699893806 | -0,747786716 | ALDH18A1 |
| ENSGALG00000010204  | 0,699072042 | -0,660708753 | KCNC2    |
| ENSGALG00000012956  | 0,692712504 | 1,372804533  | TMTC1    |
| ENSGALG00000016835  | 0,685225343 | -0,539714594 | ATP11A   |
| ENSGALG00000012696  | 0,682603698 | -0,443665071 | RANBP9   |
| ENSGALG00000016281  | 0,681257671 | -0,569360911 | DMD      |
| ENSGALG00000003640  | 0,678918743 | 1,071788322  | FAM20C   |
| ENSGALG00000027342  | 0,672830693 | -0,968330352 | METRNL   |
| ENSGALG00000027389  | 0,672548469 | -0,766788012 | RGS7BP   |
| ENSGALG00000002646  | 0,671803119 | -0,515104787 | FAM171B  |
| ENSGALG00000004612  | 0,671680213 | -0,579433401 | MTHFR    |
| ENSGALG00000007704  | 0,666805577 | -0,445645488 | NPM3     |
| ENSGALG00000023876  | 0,666027019 | 0,598475769  | PRKCQ    |
| ENSGALG00000015887  | 0,665885713 | -0,776552733 | URB1     |
| ENSGALG00000003957  | 0,665113393 | -1,565814231 | APOH     |
| ENSGALG00000006872  | 0,664035354 | -0,823650254 | PISD     |

|                    |             |              |               |
|--------------------|-------------|--------------|---------------|
| ENSGALG00000014957 | 0,661960443 | -0,81285735  | WDR1          |
| ENSGALG00000002655 | 0,657486198 | -0,468798244 | ITGAV         |
| ENSGALG00000004231 | 0,654722209 | -0,911405982 | IFNLR1        |
| ENSGALG00000011770 | 0,65450966  | -0,525890593 | UMPS          |
| ENSGALG00000016803 | 0,652622211 | -0,451555414 | ST6GAL2       |
| ENSGALG00000013031 | 0,641018743 | -0,574014118 | CECR1         |
| ENSGALG00000027835 | 0,637590923 | -0,430117051 | PCBD1         |
| ENSGALG00000024346 | 0,637233355 | 0,525612903  | FAM46B        |
| ENSGALG00000008318 | 0,633974687 | -0,756789619 | SLK           |
| ENSGALG00000004181 | 0,628709896 | -0,425938272 | GAA           |
| ENSGALG00000014922 | 0,627329029 | -0,504425665 | ROCK1         |
| ENSGALG00000012726 | 0,625221924 | -0,941672551 | HSP90B1       |
| ENSGALG00000011435 | 0,614694006 | 0,35897775   | ELK3          |
| ENSGALG00000019397 | 0,608262914 | -0,975439675 | CERK          |
| ENSGALG00000026468 | 0,607177306 | -0,514962132 | CHSY1         |
| ENSGALG00000000795 | 0,605895026 | -0,495778483 | MFSD12        |
| ENSGALG00000006939 | 0,603844144 | -0,728311968 | PFKP          |
| ENSGALG00000016834 | 0,598292773 | -0,698351437 | MCF2L         |
| ENSGALG00000011548 | 0,593504022 | -0,434202614 | PPP1R13B      |
| ENSGALG00000002709 | 0,59270728  | -0,511853662 | MYO1C         |
| ENSGALG00000008615 | 0,588449543 | -1,233824562 | LTK           |
| ENSGALG00000011295 | 0,585889038 | -1,007421144 | SOCS2         |
| ENSGALG00000012979 | 0,583725131 | -0,528975634 | TRIO          |
| ENSGALG00000007242 | 0,576491214 | -0,724284111 | SLITRK4       |
| ENSGALG00000011045 | 0,574987094 | -0,799075807 | AFF1          |
| ENSGALG00000020479 | 0,574556644 | -0,731996794 | RP11-872D17.8 |
| ENSGALG00000012429 | 0,572869136 | 1,680823476  | BMP4          |
| ENSGALG00000019961 | 0,57282511  | -0,7532835   | SLC18B1       |
| ENSGALG00000009415 | 0,570748764 | -0,939656238 | SMOC1         |
| ENSGALG00000011708 | 0,569570289 | -1,833902608 | MYLK          |
| ENSGALG00000009156 | 0,56553435  | -0,682556058 | CDAN1         |
| ENSGALG00000012394 | 0,564570466 | -0,855781498 | NID2          |
| ENSGALG00000008293 | 0,562981441 | -0,66560113  | SH3PXD2A      |
| ENSGALG00000008621 | 0,561672993 | -0,76612038  | NRP2          |
| ENSGALG00000003122 | 0,561038511 | 0,68839827   | ZFAND2A       |
| ENSGALG00000015862 | 0,559415098 | -0,756350316 | CA2           |
| ENSGALG00000027757 | 0,559044043 | -1,076478944 | ARL4A         |
| ENSGALG00000017462 | 0,558530219 | -0,763892042 | FNIP1         |
| ENSGALG00000000388 | 0,558245728 | -1,555950834 | LIN28A        |
| ENSGALG00000007238 | 0,558183051 | 0,466556765  | PCSK6         |
| ENSGALG00000012852 | 0,557720187 | -0,42431457  | MKRN1         |
| ENSGALG00000016480 | 0,557041155 | -0,647091328 | SDC1          |
| ENSGALG00000028291 | 0,555590355 | -0,672824764 | BCAR1         |
| ENSGALG00000009433 | 0,551628222 | 0,528259009  | BAG3          |
| ENSGALG00000000680 | 0,550999971 | -1,411570576 | NUAK2         |
| ENSGALG00000002461 | 0,549280944 | -0,808165073 | MMP17         |
| ENSGALG00000015215 | 0,543882262 | -0,397390834 | MAPRE2        |
| ENSGALG00000017365 | 0,541410874 | -0,712049377 | REEP2         |
| ENSGALG00000014860 | 0,540418516 | -0,625239897 | YES1          |
| ENSGALG00000016781 | 0,539823119 | -0,504088725 | MAP4K4        |
| ENSGALG00000016883 | 0,537559856 | -0,555002491 | DOCK9         |
| ENSGALG00000011449 | 0,537091274 | -0,594721435 |               |
| ENSGALG00000009855 | 0,536813312 | -0,567662024 | TBC1D9        |
| ENSGALG00000000891 | 0,531658469 | -0,533422492 | NSUN5         |
| ENSGALG00000015112 | 0,528998124 | -1,013051509 | ZNF521        |
| ENSGALG00000006002 | 0,517539205 | -0,422978689 | WHDC1         |
| ENSGALG00000011162 | 0,516837911 | -0,640538648 | CYP46A1       |
| ENSGALG00000000761 | 0,511636934 | -0,649687901 | TSKU          |
| ENSGALG00000008811 | 0,510104856 | -0,931412058 | SLC1A4        |
| ENSGALG00000003668 | 0,508101808 | -0,85921128  | PITPNC1       |
| ENSGALG00000015458 | 0,50234495  | -0,453606012 | ILDR2         |
| ENSGALG00000017388 | 0,49802444  | -0,619582917 | YY1           |

|                    |             |              |              |
|--------------------|-------------|--------------|--------------|
| ENSGALG00000009503 | 0,49017284  | -0,547842813 | RAB3GAP2     |
| ENSGALG00000000936 | 0,490067343 | -1,193444435 | LMX1B        |
| ENSGALG00000001678 | 0,489550679 | -0,54750013  | LONRF2       |
| ENSGALG00000001962 | 0,488180846 | -0,330389801 | PTBP1        |
| ENSGALG00000002316 | 0,486190455 | -0,700708149 | NUBP2        |
| ENSGALG00000005727 | 0,485528575 | -0,548590838 | SLC7A3       |
| ENSGALG00000013661 | 0,485373842 | -0,40778269  | MICU3        |
| ENSGALG00000006237 | 0,48464383  | -0,616678741 | PKN2         |
| ENSGALG00000006121 | 0,483017989 | -0,468808823 | PIK3C2A      |
| ENSGALG00000003835 | 0,482616746 | -0,552761335 | ATP2A2       |
| ENSGALG00000028128 | 0,475145623 | 0,378077792  | HOXD8        |
| ENSGALG00000014953 | 0,474792932 | -0,429472364 | RWDD1        |
| ENSGALG00000014873 | 0,474224225 | -0,6514166   | GJA1         |
| ENSGALG00000009532 | 0,469457498 | -1,242374232 | GXYLT1       |
| ENSGALG00000016808 | 0,46860233  | -0,615970468 | RANBP2       |
| ENSGALG00000002726 | 0,464112357 | -0,708755608 | KIF1B        |
| ENSGALG00000004144 | 0,459129046 | -0,588131949 | DDX50        |
| ENSGALG00000009850 | 0,458569963 | -0,63459607  | NOVA1        |
| ENSGALG00000014688 | 0,458090231 | -0,396059354 | ZYX          |
| ENSGALG00000013480 | 0,457972294 | -0,615680556 | MTHFD2       |
| ENSGALG00000015940 | 0,457737572 | -0,972506334 | TMEM67       |
| ENSGALG00000005134 | 0,45766228  | -0,483437706 | ZSWIM8       |
| ENSGALG00000003295 | 0,455390197 | -1,063705711 | ADAMTS12     |
| ENSGALG00000008521 | 0,447794364 | -0,395949661 | TP53BP1      |
| ENSGALG00000006947 | 0,446651103 | 0,64187784   | BDH1         |
| ENSGALG00000001596 | 0,445911724 | -0,383722949 | MLLT1        |
| ENSGALG00000009300 | 0,444814977 | -0,413699825 | NUMB         |
| ENSGALG00000005785 | 0,442398124 | -0,791416097 | UBAP2        |
| ENSGALG00000004169 | 0,441293938 | -0,613558741 |              |
| ENSGALG00000001957 | 0,438219772 | -0,541703645 | ITCH         |
| ENSGALG00000013861 | 0,437973226 | -0,913164571 | TNFAIP3      |
| ENSGALG00000014419 | 0,437804845 | -0,730417334 | SLIT2        |
| ENSGALG00000011464 | 0,435819807 | -0,582311331 | EIF5         |
| ENSGALG00000011643 | 0,435706974 | -0,816325927 | UTP20        |
| ENSGALG00000011707 | 0,43414341  | -0,516018775 | UBA5         |
| ENSGALG00000014686 | 0,43250268  | -0,691021625 | FBN2         |
| ENSGALG00000009534 | 0,430698068 | -0,408065762 | PLEKHA1      |
| ENSGALG00000001376 | 0,43069552  | 0,45012042   | ARID3B       |
| ENSGALG00000007659 | 0,429907921 | -0,45246564  | HYOU1        |
| ENSGALG00000014784 | 0,427987842 | -0,520975246 | MAST4        |
| ENSGALG00000004638 | 0,427666392 | -0,48870476  | HEPH         |
| ENSGALG00000010975 | 0,425801788 | -0,624280901 | TMTC2        |
| ENSGALG00000011246 | 0,419525625 | -0,471179653 | CHPF         |
| ENSGALG00000004531 | 0,419189684 | -0,458962037 | PLOD1        |
| ENSGALG00000020805 | 0,416086722 | -0,719835862 | LRRC8D       |
| ENSGALG00000005723 | 0,412949734 | -0,890647194 | RP11-96O20.4 |
| ENSGALG00000007141 | 0,412800257 | -0,70907976  | LRRK1        |
| ENSGALG00000005796 | 0,407045166 | -0,664735985 | XBP1         |
| ENSGALG00000023451 | 0,405630741 | -0,638494594 | TRPM7        |
| ENSGALG00000012814 | 0,404889777 | -0,898069575 | PXDC1        |
| ENSGALG00000028267 | 0,403950335 | -0,473386218 | GOLPH3       |
| ENSGALG00000017085 | 0,403507696 | -0,511832688 | SLC7A1       |
| ENSGALG00000009748 | 0,403044512 | -0,762363604 | ASNS         |
| ENSGALG00000011101 | 0,40109735  | -0,47005983  | URB2         |
| ENSGALG00000008195 | 0,394418985 | -0,378910892 | NPHP1        |
| ENSGALG00000002763 | 0,38996775  | -0,423193935 | FRZB         |
| ENSGALG00000014902 | 0,387988657 | -0,650325285 | RP1-179P9.3  |
| ENSGALG00000008708 | 0,384060223 | -0,423296325 | ESF1         |
| ENSGALG00000004200 | 0,383702067 | -0,347970886 | DPP9         |
| ENSGALG00000019077 | 0,383662275 | -1,030078317 |              |
| ENSGALG00000015765 | 0,383191974 | -0,587270267 | POLR1A       |
| ENSGALG00000000464 | 0,378042232 | 0,587838297  | RHOBTB2      |



|                    |              |              |          |
|--------------------|--------------|--------------|----------|
| ENSGALG00000008240 | 0,376593038  | -0,670953542 | CFLAR    |
| ENSGALG00000014213 | 0,372421493  | -0,596053951 | PRR5     |
| ENSGALG00000009428 | 0,369028406  | -0,792261942 | SUSD6    |
| ENSGALG00000003180 | 0,367625634  | -0,573999724 | TSR1     |
| ENSGALG00000006336 | 0,365567709  | -0,452052929 | PAXIP1   |
| ENSGALG00000005845 | 0,364474801  | -0,655210424 | SLC7A5   |
| ENSGALG00000004696 | 0,360778491  | -0,381141883 | LEO1     |
| ENSGALG00000009562 | 0,359101036  | -0,714412903 | PLEK2    |
| ENSGALG00000007145 | 0,358001987  | -0,440432711 | ITGB1    |
| ENSGALG00000010603 | 0,356862546  | -0,604746743 | CEBPZ    |
| ENSGALG00000003563 | 0,354826794  | -0,364389392 | YARS     |
| ENSGALG00000005160 | 0,351320099  | -0,454934871 | VMP1     |
| ENSGALG00000002954 | 0,350618821  | -0,457794297 | MBTD1    |
| ENSGALG00000001749 | 0,34679817   | -0,88875485  | ACSBG2   |
| ENSGALG00000003427 | 0,346212827  | -0,813323099 | USP3     |
| ENSGALG00000009540 | 0,344720194  | -0,9229711   | YAF2     |
| ENSGALG00000006437 | 0,344612756  | -0,682364759 | NOM1     |
| ENSGALG00000001003 | 0,344161191  | -0,600081977 | SEPN1    |
| ENSGALG00000007234 | 0,343143822  | -0,505755971 | CLCN5    |
| ENSGALG00000025884 | 0,339208538  | -0,543082298 | NABP1    |
| ENSGALG00000026349 | 0,337656858  | -0,736634172 | HSD17B12 |
| ENSGALG00000012202 | 0,337252452  | -0,341191282 | KBTBD2   |
| ENSGALG00000010976 | 0,337203087  | -0,434636867 | CCDC126  |
| ENSGALG00000006975 | 0,33439022   | -0,659116429 | TBC1D22A |
| ENSGALG00000003767 | 0,331888441  | -0,636798593 | NKD1     |
| ENSGALG00000006256 | 0,33180927   | -0,600800071 | MAP7D3   |
| ENSGALG00000015049 | 0,323309666  | -0,441268065 | AMD1     |
| ENSGALG00000004132 | 0,317911072  | -0,797075856 | UHRF1    |
| ENSGALG00000009448 | 0,31659087   | -0,43880669  | IFRD1    |
| ENSGALG00000000258 | 0,314352619  | -0,649481888 | HEATR1   |
| ENSGALG00000009992 | 0,311546697  | -0,521017168 | ARHGAP5  |
| ENSGALG00000008837 | 0,311145069  | -0,471745405 | PELI1    |
| ENSGALG00000008265 | 0,310830618  | -0,619236444 | PDCD11   |
| ENSGALG00000011228 | 0,310544896  | -0,565699287 | WARS     |
| ENSGALG00000017111 | 0,309121441  | -0,428517877 | NUP58    |
| ENSGALG00000006971 | 0,308524903  | -0,549657911 | CDK5RAP2 |
| ENSGALG00000003039 | 0,308092774  | -0,372512284 | SRM      |
| ENSGALG00000000346 | 0,306247189  | -0,429865287 | ZNF606   |
| ENSGALG00000002863 | 0,306238468  | -0,447764784 | ERGIC1   |
| ENSGALG00000010349 | 0,300633215  | -0,358393493 | POLR1C   |
| ENSGALG00000007387 | 0,298075088  | -0,330955786 | GTF3C1   |
| ENSGALG00000011357 | 0,296426831  | -0,387039211 | VEZT     |
| ENSGALG00000010536 | 0,29615271   | -0,646034394 | FAF1     |
| ENSGALG00000011400 | 0,295706421  | -0,550294288 | USP44    |
| ENSGALG00000012138 | 0,295412949  | -0,402996238 | sept-07  |
| ENSGALG00000002985 | 0,293105421  | -0,378678888 | UTP18    |
| ENSGALG00000003391 | 0,293097669  | -0,827807721 | EIF2AK1  |
| ENSGALG00000006856 | 0,290795459  | -0,537151634 | CD151    |
| ENSGALG00000006895 | 0,290027475  | -0,543915173 | CEP131   |
| ENSGALG00000016910 | 0,283615388  | -0,572230903 | RBM26    |
| ENSGALG00000009325 | 0,276324484  | -0,363294006 | OLA1     |
| ENSGALG00000003339 | 0,27482717   | -0,366040447 | MTOR     |
| ENSGALG00000010481 | 0,274549325  | -0,330642085 | CMPK1    |
| ENSGALG00000005243 | 0,272933583  | -0,597738338 | PPP3CB   |
| ENSGALG00000009782 | 0,272414043  | -0,507579083 | NAA15    |
| ENSGALG00000011596 | 0,272230864  | -0,519655791 | PTPN4    |
| ENSGALG00000006935 | 0,270244925  | -0,506724591 | BTAF1    |
| ENSGALG00000003078 | 0,264245742  | -0,483195985 | MMD      |
| ENSGALG00000026300 | -0,257041042 | 0,345400821  |          |
| ENSGALG00000020003 | -0,275409017 | -0,59891041  | MAP3K4   |
| ENSGALG00000027963 | -0,279887477 | 0,451771641  | COX7C    |
| ENSGALG00000027710 | -0,296769112 | 0,421872733  | DAG1     |

|                    |              |              |              |
|--------------------|--------------|--------------|--------------|
| ENSGALG00000015326 | -0,301560094 | 0,524363909  | CLTA         |
| ENSGALG00000006094 | -0,306148177 | -0,454736184 | PHF6         |
| ENSGALG00000012121 | -0,306219207 | -0,541445831 | RCN1         |
| ENSGALG00000012546 | -0,312592383 | 0,318249627  | MCM5         |
| ENSGALG00000026437 | -0,314002706 | 0,703536871  |              |
| ENSGALG00000025764 | -0,316576106 | 0,675250138  | FKBP10       |
| ENSGALG00000006483 | -0,318521408 | -0,399267586 | AMOTL2       |
| ENSGALG00000013784 | -0,32170776  | 0,339967639  | CDT1         |
| ENSGALG00000016870 | -0,322919481 | 0,454001604  | TMTC4        |
| ENSGALG00000020528 | -0,323800436 | 0,424819785  | INIP         |
| ENSGALG00000004621 | -0,328680536 | -0,512109985 | PREX1        |
| ENSGALG00000028470 | -0,330867645 | 0,39443368   | GSR          |
| ENSGALG00000021365 | -0,33098251  | 0,432965219  | DCTN3        |
| ENSGALG00000025818 | -0,334464872 | 0,571475138  | KCNK5        |
| ENSGALG00000004581 | -0,341091866 | 0,466855623  | NDST1        |
| ENSGALG00000000684 | -0,343510226 | -0,552570682 | KLHDC8A      |
| ENSGALG00000008758 | -0,348320506 | -0,696392948 | B3GNT5       |
| ENSGALG00000010674 | -0,348433039 | -0,399166032 | DCTD         |
| ENSGALG00000016034 | -0,349640251 | -0,4051791   | ATRN         |
| ENSGALG00000014970 | -0,352181226 | 0,397421157  | FSTL1        |
| ENSGALG00000000921 | -0,356222635 | 0,454646053  | SLC9A1       |
| ENSGALG00000017329 | -0,359975454 | 0,44555284   | FCHSD2       |
| ENSGALG00000026081 | -0,379250879 | 0,588777417  | RBM38        |
| ENSGALG00000015469 | -0,382238702 | 1,115704157  | IGSF3        |
| ENSGALG00000006702 | -0,38370743  | 0,471728545  | MFGE8        |
| ENSGALG00000024047 | -0,387381439 | -0,380223912 | MYCL         |
| ENSGALG00000006606 | -0,392475054 | 1,610976489  | KIAA1324L    |
| ENSGALG00000003457 | -0,397746039 | 0,662964808  | CNP          |
| ENSGALG00000013067 | -0,398595631 | 0,494753671  | AKR1B1       |
| ENSGALG00000028567 | -0,405726705 | 0,515072598  | MYL9         |
| ENSGALG00000026870 | -0,410373931 | 0,966911139  | TMEM200C     |
| ENSGALG00000016152 | -0,412571324 | 0,558712272  | LY6E         |
| ENSGALG00000011778 | -0,415058611 | 0,494085012  | ITGB5        |
| ENSGALG00000011238 | -0,417063936 | 0,316616268  | WLS          |
| ENSGALG00000013002 | -0,420522444 | 0,734684533  | DAP          |
| ENSGALG00000005237 | -0,426583983 | -0,342909039 | FGD3         |
| ENSGALG00000005330 | -0,431988153 | 1,328511787  | SNCAIP       |
| ENSGALG00000016328 | -0,434072431 | 1,146952103  | GSTA         |
| ENSGALG00000026113 | -0,434078932 | 0,523056553  | CARHSP1      |
| ENSGALG00000029174 | -0,450699904 | 1,589321167  |              |
| ENSGALG00000006036 | -0,461900797 | 0,644947298  |              |
| ENSGALG00000022926 | -0,463163963 | 0,576442566  | GPR162       |
| ENSGALG00000017119 | -0,467363832 | -0,420708881 | TNFRSF19     |
| ENSGALG00000006885 | -0,469804206 | 0,574664846  | HRAS         |
| ENSGALG00000010422 | -0,470203966 | 0,646628908  | FEZ1         |
| ENSGALG00000007710 | -0,471105348 | -0,637223247 |              |
| ENSGALG00000027373 | -0,47216803  | -0,413207621 |              |
| ENSGALG00000015107 | -0,4734568   | 0,542439326  | PIP5K1B      |
| ENSGALG00000012658 | -0,475116315 | 1,214376265  | TCP11L2      |
| ENSGALG00000015660 | -0,475673447 | 0,831570906  | SNX30        |
| ENSGALG00000000316 | -0,476826949 | 0,549437781  | PKNOX2       |
| ENSGALG00000029011 | -0,483499319 | -0,444941401 | SLC35F1      |
| ENSGALG00000010316 | -0,484012085 | 0,662660688  | FRAS1        |
| ENSGALG00000001966 | -0,490465312 | 0,545673399  | RP11-106M3.5 |
| ENSGALG00000001816 | -0,495397442 | 0,414935997  | MAGI3        |
| ENSGALG00000009207 | -0,499904522 | -0,518081559 | TRIM2        |
| ENSGALG00000026505 | -0,503934058 | 0,837091894  | RDH10        |
| ENSGALG00000002777 | -0,509947463 | 0,524514209  | ACAA2        |
| ENSGALG00000025977 | -0,513209442 | 0,502103804  | GADD45A      |
| ENSGALG00000008728 | -0,517913117 | 0,625207283  | PTER         |
| ENSGALG00000022713 | -0,525946923 | 0,539793648  | FAM181B      |
| ENSGALG00000005246 | -0,527306483 | -0,7272373   | PAX3         |

|                    |              |              |            |
|--------------------|--------------|--------------|------------|
| ENSGALG00000010982 | -0,53129631  | 0,55035484   | NID1       |
| ENSGALG00000006480 | -0,534658874 | 0,810690895  | TCF7       |
| ENSGALG00000016551 | -0,548003277 | 1,321564075  | AC025048.1 |
| ENSGALG00000008433 | -0,549541331 | 0,732487     | FZD2       |
| ENSGALG00000013964 | -0,55034782  | 0,602864404  | SPATA18    |
| ENSGALG00000004323 | -0,5545441   | 0,7637615    | RASAL2     |
| ENSGALG00000015987 | -0,554680878 | 0,445391941  | TP53INP1   |
| ENSGALG00000008871 | -0,555142332 | -0,492812674 | LPHN2      |
| ENSGALG00000004593 | -0,555306466 | 0,839985137  | SULF2      |
| ENSGALG00000014242 | -0,557782152 | 0,583190799  | BEND4      |
| ENSGALG00000012710 | -0,557841328 | 0,660750331  | NCS1       |
| ENSGALG00000004537 | -0,559387674 | 0,454616982  | EFNB1      |
| ENSGALG00000028795 | -0,566961474 | 1,118039364  | CADM3      |
| ENSGALG00000004741 | -0,573167729 | 0,509578858  | EPHB2      |
| ENSGALG00000004256 | -0,575998874 | -0,396589984 | DHRS3      |
| ENSGALG00000003404 | -0,585273519 | 1,24748878   | TFEB       |
| ENSGALG00000002707 | -0,585668905 | 0,58133458   | CHRNA2     |
| ENSGALG00000008961 | -0,593936394 | -0,780468343 | PTPRZ1     |
| ENSGALG00000006409 | -0,594856883 | -0,436770571 | PODXL      |
| ENSGALG00000026180 | -0,59981586  | 0,591162305  | MSX2       |
| ENSGALG00000012712 | -0,607252424 | 0,742584862  | RBM24      |
| ENSGALG00000016251 | -0,611728855 | 1,000647408  | TSPAN7     |
| ENSGALG00000002974 | -0,611833543 | -0,529999669 | SPHKAP     |
| ENSGALG00000008367 | -0,614602858 | 0,522250337  | MDK        |
| ENSGALG00000010551 | -0,614933753 | 0,911984879  | CDC42EP3   |
| ENSGALG00000002652 | -0,621511478 | -0,509052755 | FZD10      |
| ENSGALG00000003582 | -0,622442826 | -1,218636528 | SLC1A3     |
| ENSGALG00000007076 | -0,624816157 | 0,617550884  | CCNY       |
| ENSGALG00000016391 | -0,625110592 | -0,569812042 | CNKS2      |
| ENSGALG00000027377 | -0,626128444 | 0,469161575  | NKAIN3     |
| ENSGALG00000015729 | -0,630253804 | 0,747405326  | LPAR1      |
| ENSGALG00000007748 | -0,63248212  | 0,758936347  | SLC16A2    |
| ENSGALG00000000040 | -0,633128633 | 0,669045681  | FAM195A    |
| ENSGALG00000010320 | -0,636363776 | 0,704383823  | PAWR       |
| ENSGALG00000006152 | -0,63795304  | 0,657637784  |            |
| ENSGALG00000002437 | -0,638363537 | 0,993124174  | FAM69B     |
| ENSGALG00000010269 | -0,639329258 | 0,886301871  | KCNAB1     |
| ENSGALG00000006826 | -0,641184602 | -0,530661584 | KLHL25     |
| ENSGALG00000028543 | -0,64250805  | 0,614319385  | FGFR4      |
| ENSGALG00000012577 | -0,644333952 | 0,956309243  | FRMD3      |
| ENSGALG00000015241 | -0,649652118 | -0,655397927 | SNAI2      |
| ENSGALG00000017036 | -0,649834759 | 1,353726483  | LHFP       |
| ENSGALG00000009439 | -0,662995235 | 0,751125582  | GPR85      |
| ENSGALG00000005628 | -0,664092027 | 0,601333554  | COL9A3     |
| ENSGALG00000005657 | -0,664586696 | 0,780089243  | CRHR2      |
| ENSGALG00000007732 | -0,671216647 | 1,306274335  | RTN4R      |
| ENSGALG00000010119 | -0,672877793 | 0,900097678  | CDKL2      |
| ENSGALG00000004309 | -0,673847887 | 0,913060877  | GDAP1L1    |
| ENSGALG00000005774 | -0,674007323 | -0,555555373 | NKAIN4     |
| ENSGALG00000017106 | -0,674065701 | 1,082115941  | ATP8A2     |
| ENSGALG00000016945 | -0,674331354 | 0,953551228  | LECT1      |
| ENSGALG00000006555 | -0,681158051 | -0,729109536 | IGF2       |
| ENSGALG00000001727 | -0,689838866 | 1,445847057  | LZTS1      |
| ENSGALG00000023073 | -0,692447843 | 0,353608475  | AKAP12     |
| ENSGALG00000009626 | -0,694120539 | -0,375704266 | THBS1      |
| ENSGALG00000003580 | -0,694931491 | 1,284312011  | MMP2       |
| ENSGALG00000002818 | -0,699438203 | 0,595523293  | VAT1       |
| ENSGALG00000003589 | -0,699453771 | 0,652278144  | VTN        |
| ENSGALG00000006882 | -0,700351611 | 0,976472658  | ST8SIA2    |
| ENSGALG00000004676 | -0,710261932 | 0,910530695  | BTG3       |
| ENSGALG00000015926 | -0,714450321 | 0,934566237  | RUNX1T1    |
| ENSGALG00000025919 | -0,717706563 | 0,857090747  | BAMBI      |

|                     |              |              |               |
|---------------------|--------------|--------------|---------------|
| ENSGALG00000002016  | -0,719060037 | 1,156233761  | PRKCD         |
| ENSGALG00000000674  | -0,719912044 | 0,67836471   | MYO1D         |
| ENSGALG000000005608 | -0,721159959 | 0,44662731   | SLC9A3R2      |
| ENSGALG000000002749 | -0,723137568 | 0,687223145  | RP11-565P22.6 |
| ENSGALG000000001449 | -0,723393814 | 0,740070536  | STRA6         |
| ENSGALG000000006792 | -0,726229187 | 1,109047707  | VSTM2L        |
| ENSGALG000000009020 | -0,742019908 | -0,446477137 | JAG1          |
| ENSGALG000000009536 | -0,742471798 | 0,851130737  |               |
| ENSGALG000000015448 | -0,755416575 | -0,533672096 | TOX           |
| ENSGALG000000005626 | -0,756044449 | 0,92496767   | TPST2         |
| ENSGALG000000000690 | -0,756893418 | -0,657633862 | GDPD4         |
| ENSGALG000000015768 | -0,757420183 | 0,855142896  | ANKRD6        |
| ENSGALG000000006793 | -0,758190034 | 0,898163749  | NTRK3         |
| ENSGALG000000002742 | -0,7644405   | 0,847416181  | TMEM132B      |
| ENSGALG000000015297 | -0,764510224 | 0,81224071   | FOXO3         |
| ENSGALG000000016543 | -0,766325509 | 0,654951402  | NHS           |
| ENSGALG000000006192 | -0,767192565 | 0,958606154  | USH1C         |
| ENSGALG000000007623 | -0,778310378 | 0,788173273  | CACNA1G       |
| ENSGALG000000026042 | -0,780763307 | 0,987626868  | SHISA3        |
| ENSGALG000000012191 | -0,787037882 | 0,72968259   | LGR4          |
| ENSGALG000000012652 | -0,806982417 | 1,438231617  | KCNG2         |
| ENSGALG000000016223 | -0,80722926  | 1,013131958  | MAOB          |
| ENSGALG000000004844 | -0,807613149 | 0,581688828  | SEMA6D        |
| ENSGALG000000004986 | -0,810825031 | -0,430376609 | CERCAM        |
| ENSGALG000000004472 | -0,814406115 | 0,672299012  | ASTN1         |
| ENSGALG000000017374 | -0,814717413 | 1,149174538  | SLITRK3       |
| ENSGALG000000009514 | -0,816414808 | -0,779501664 | NRCAM         |
| ENSGALG000000012715 | -0,842621875 | 0,978917656  | CAP2          |
| ENSGALG000000015084 | -0,852219609 | 1,480304896  | IGSF11        |
| ENSGALG000000006873 | -0,854385087 | 0,565449117  | RASSF7        |
| ENSGALG000000009052 | -0,861077306 | 0,987910707  | LBH           |
| ENSGALG000000026192 | -0,861152656 | -0,473341595 | ST8SIA4       |
| ENSGALG000000028946 | -0,867278013 | 1,217039733  | CSRP2         |
| ENSGALG000000008297 | -0,875877387 | 0,379216929  | SEMA4B        |
| ENSGALG000000011709 | -0,876476185 | 0,918333355  | TMEM108       |
| ENSGALG000000003345 | -0,878084006 | 1,211546204  | PLCD4         |
| ENSGALG000000023738 | -0,882263773 | 0,704601132  |               |
| ENSGALG000000027501 | -0,88631831  | 1,108782799  | ANPEP         |
| ENSGALG000000003426 | -0,891859274 | -0,587203746 | RHBDL3        |
| ENSGALG000000001129 | -0,899923251 | 0,871868135  | KIRREL3       |
| ENSGALG000000015186 | -0,900331794 | 1,345677898  | KLHL14        |
| ENSGALG000000006245 | -0,900397348 | 1,589094556  | KLF15         |
| ENSGALG000000009603 | -0,909672796 | 0,844955114  |               |
| ENSGALG000000028234 | -0,912907561 | 1,03829388   | SYNDIG1       |
| ENSGALG000000015967 | -0,91657646  | 0,936813576  | LRRTM1        |
| ENSGALG000000020688 | -0,921010154 | 0,678030575  | CYP4B1L       |
| ENSGALG000000020376 | -0,925271568 | 0,781084057  |               |
| ENSGALG000000007078 | -0,925877896 | 1,270778013  | ENTPD1        |
| ENSGALG000000005539 | -0,927364348 | 0,77704495   | ITM2C         |
| ENSGALG000000006346 | -0,927790987 | 0,756405715  | CXCL14        |
| ENSGALG000000020575 | -0,930944308 | 0,690014438  | ERMN          |
| ENSGALG000000009237 | -0,942598283 | 1,124183808  | TLR2A         |
| ENSGALG000000009042 | -0,948736093 | 0,719468223  | ISM1          |
| ENSGALG000000004849 | -0,955100006 | 0,553445556  | WSCD2         |
| ENSGALG000000011200 | -0,962880109 | 1,609360966  | THBS2         |
| ENSGALG000000006507 | -0,967854239 | 0,793097237  | CLMP          |
| ENSGALG000000026153 | -0,984548638 | 0,755983234  | FOXO6         |
| ENSGALG000000001795 | -0,995172186 | 1,261084777  | GFRA2         |
| ENSGALG000000002832 | -0,995334878 | 1,610990532  | IFI35         |
| ENSGALG000000019280 | -1,005672086 | 1,199070585  | LMO3          |
| ENSGALG000000010500 | -1,016915026 | 0,828235743  | NKX6-2        |
| ENSGALG000000027891 | -1,030686173 | 0,504324315  | NREP          |



|                    |              |              |         |
|--------------------|--------------|--------------|---------|
| ENSGALG00000020788 | -1,041075867 | -0,986044977 | CCDC141 |
| ENSGALG00000008455 | -1,05482755  | 0,695894902  | SEMA3C  |
| ENSGALG00000009601 | -1,061491773 | 0,878730197  | NELL2   |
| ENSGALG00000003588 | -1,081475528 | 0,911216657  |         |
| ENSGALG00000009638 | -1,085140036 | 0,988233263  | ANO6    |
| ENSGALG00000007908 | -1,09305059  | 1,477721596  | EFEMP1  |
| ENSGALG00000013948 | -1,099632212 | 0,760675086  | RASL11B |
| ENSGALG00000028682 | -1,101427497 | 0,990483134  |         |
| ENSGALG00000008440 | -1,108083257 | 1,543692993  | CHST1   |
| ENSGALG00000007211 | -1,108214376 | 1,44654086   | CDH22   |
| ENSGALG00000028506 | -1,110787668 | 0,637581477  |         |
| ENSGALG00000002028 | -1,145532965 | 0,675138088  | GPRC5B  |
| ENSGALG00000004448 | -1,158751146 | 1,504790559  | BRINP2  |
| ENSGALG00000005967 | -1,230002366 | 1,545091384  | LMO1    |
| ENSGALG00000014258 | -1,256488908 | 1,040436704  | LIMCH1  |
| ENSGALG00000023577 | -1,257090663 | 2,257832359  | TBX2    |
| ENSGALG00000016411 | -1,262862187 | 0,657856223  | COL14A1 |
| ENSGALG00000009604 | -1,349943691 | 0,581479374  | DBX2    |
| ENSGALG00000011205 | -1,462754207 | 0,836341019  | SMOC2   |
