# Supplementary material for: HOXB8 Counteracts MAPK/ERK Oncogenic Signaling in a Chicken Embryo Model of Neoplasia
Source: MDPI journal article supplement (doi:10.3390/ijms22168911), 2021-08-18
Supplement: s1 [file s1]

**Table S1:** MEK1ca+HOXB8 versus MEK1ca differentially regulated genes (False Discovery Rate (padj) <= 0.01)

| D                   | baseMean   | log2FoldChange | lfcSE      | stat       | pvalue    | padj      | Symbol   |
|---------------------|------------|----------------|------------|------------|-----------|-----------|----------|
| ENSGALG000000026853 | 1756,76051 | 5,751530736    | 0,19626668 | 29,3046727 | 9,04E-189 | 6,16E-185 | FGF3     |
| ENSGALG000000011433 | 901,861183 | 4,353428748    | 0,19799365 | 21,9877188 | 3,77E-107 | 1,28E-103 |          |
| ENSGALG000000009778 | 267,922713 | 4,29765073     | 0,29733506 | 14,4538982 | 2,37E-47  | 9,77E-45  |          |
| ENSGALG000000011582 | 175,170205 | 4,101846269    | 0,31827959 | 12,8875569 | 5,29E-38  | 1,53E-35  |          |
| ENSGALG000000027742 | 312,342696 | 3,96517198     | 0,26630875 | 14,8893793 | 3,86E-50  | 1,81E-47  | KLHL33   |
| ENSGALG000000028044 | 194,51466  | 3,90733608     | 0,30410231 | 12,848755  | 8,74E-38  | 2,48E-35  |          |
| ENSGALG000000002108 | 813,374631 | 3,799830272    | 0,19658831 | 19,328872  | 3,07E-83  | 5,23E-80  | EVPL     |
| ENSGALG000000021395 | 138,406928 | 3,681673719    | 0,32878732 | 11,1977363 | 4,18E-29  | 6,70E-27  |          |
| ENSGALG000000001080 | 589,095015 | 3,620989798    | 0,22311063 | 16,2295708 | 3,12E-59  | 2,02E-56  | NR5A1    |
| ENSGALG000000005292 | 233,995114 | 3,593969871    | 0,28192744 | 12,7478541 | 3,20E-37  | 8,90E-35  | KLHL40   |
| ENSGALG000000028376 | 1521,83584 | 3,47510163     | 0,19828778 | 17,525546  | 9,15E-69  | 7,78E-66  | FGF19    |
| ENSGALG000000023843 | 120,841933 | 3,393126537    | 0,33077585 | 10,2580842 | 1,09E-24  | 1,35E-22  | FRMD7    |
| ENSGALG000000006471 | 279,298959 | 3,309144864    | 0,28892507 | 11,4532978 | 2,26E-30  | 4,04E-28  | SLCO2A1  |
| ENSGALG000000028304 | 118,793101 | 3,251722149    | 0,33476041 | 9,71358044 | 2,64E-22  | 2,58E-20  |          |
| ENSGALG000000004526 | 421,691059 | 3,217263436    | 0,24373894 | 13,1996283 | 8,82E-40  | 2,93E-37  | TNR      |
| ENSGALG000000008069 | 109,411674 | 3,182915984    | 0,34138391 | 9,32356755 | 1,12E-20  | 9,51E-19  |          |
| ENSGALG000000004134 | 133,434282 | 3,164728278    | 0,32672711 | 9,6861515  | 3,45E-22  | 3,31E-20  | GLRA1    |
| ENSGALG000000012254 | 87,731989  | 3,162704218    | 0,3459847  | 9,14116788 | 6,18E-20  | 4,98E-18  | KCNJ4    |
| ENSGALG000000006944 | 469,144675 | 3,116432937    | 0,23983811 | 12,9939021 | 1,32E-38  | 4,01E-36  |          |
| ENSGALG000000028612 | 103,60478  | 3,070056483    | 0,34649284 | 8,86037489 | 7,97E-19  | 5,81E-17  |          |
| ENSGALG000000005285 | 100,237429 | 2,996752626    | 0,34025326 | 8,80741788 | 1,28E-18  | 8,94E-17  | TBX4     |
| ENSGALG000000007335 | 107,298878 | 2,985281892    | 0,34055773 | 8,76586154 | 1,85E-18  | 1,28E-16  | KBTBD13  |
| ENSGALG000000001256 | 266,944995 | 2,963677659    | 0,29793308 | 9,94746081 | 2,59E-23  | 2,71E-21  | NLRC5    |
| ENSGALG000000016685 | 93,4474561 | 2,945393761    | 0,33836846 | 8,70469363 | 3,18E-18  | 2,13E-16  | ASMT     |
| ENSGALG000000016721 | 160,3282   | 2,940591405    | 0,30420224 | 9,66656738 | 4,18E-22  | 3,93E-20  | PLCXD1   |
| ENSGALG000000026167 | 171,614092 | 2,925839411    | 0,31778334 | 9,20702576 | 3,35E-20  | 2,78E-18  | PIK3R5   |
| ENSGALG000000002926 | 76,2289496 | 2,900739748    | 0,35004614 | 8,28673542 | 1,16E-16  | 6,86E-15  |          |
| ENSGALG000000004700 | 97,8406537 | 2,88173675     | 0,33435932 | 8,61868224 | 6,77E-18  | 4,45E-16  | NCF2     |
| ENSGALG000000016722 | 73,4311203 | 2,829128945    | 0,35273145 | 8,0206314  | 1,05E-15  | 5,52E-14  |          |
| ENSGALG000000012830 | 227,950727 | 2,760094911    | 0,2851044  | 9,68099721 | 3,63E-22  | 3,44E-20  |          |
| ENSGALG000000027247 | 97,4363295 | 2,75413056     | 0,33274463 | 8,27700976 | 1,26E-16  | 7,41E-15  | EOMES    |
| ENSGALG000000002823 | 276,033949 | 2,746001119    | 0,25652175 | 10,7047499 | 9,67E-27  | 1,39E-24  |          |
| ENSGALG000000006614 | 540,926615 | 2,721769719    | 0,26010327 | 10,4641889 | 1,26E-25  | 1,70E-23  |          |
| ENSGALG000000006744 | 446,950734 | 2,709854582    | 0,26391565 | 10,2678814 | 9,83E-25  | 1,23E-22  |          |
| ENSGALG000000020485 | 352,825328 | 2,707785881    | 0,28649565 | 9,45140328 | 3,34E-21  | 2,90E-19  |          |
| ENSGALG000000015322 | 401,95748  | 2,694878773    | 0,24687156 | 10,9161165 | 9,65E-28  | 1,43E-25  | IMPG2    |
| ENSGALG000000025886 | 234,932728 | 2,681244585    | 0,27696529 | 9,68079628 | 3,64E-22  | 3,44E-20  | SUSD3    |
| ENSGALG000000013922 | 145,692651 | 2,651462599    | 0,31447645 | 8,43135507 | 3,42E-17  | 2,11E-15  |          |
| ENSGALG000000026590 | 256,390276 | 2,649598672    | 0,26552851 | 9,97858437 | 1,89E-23  | 2,01E-21  |          |
| ENSGALG000000016325 | 669,814955 | 2,632246576    | 0,2229691  | 11,8054319 | 3,66E-32  | 7,66E-30  |          |
| ENSGALG000000026627 | 138,559837 | 2,620280418    | 0,32529098 | 8,0551894  | 7,94E-16  | 4,29E-14  |          |
| ENSGALG000000001780 | 98,3971    | 2,613843166    | 0,33586268 | 7,78247584 | 7,11E-15  | 3,32E-13  | PROC     |
| ENSGALG000000002987 | 118,456359 | 2,607861451    | 0,32067745 | 8,13235054 | 4,21E-16  | 2,34E-14  | SERPINF2 |
| ENSGALG000000027059 | 200,391038 | 2,606173672    | 0,28900153 | 9,01785421 | 1,92E-19  | 1,48E-17  |          |
| ENSGALG000000023821 | 140,669435 | 2,605691323    | 0,31496616 | 8,2729246  | 1,31E-16  | 7,64E-15  |          |
| ENSGALG000000006032 | 296,771768 | 2,599165832    | 0,27225162 | 9,54692527 | 1,34E-21  | 1,19E-19  |          |
| ENSGALG000000002960 | 103,932494 | 2,574242623    | 0,33553695 | 7,67200941 | 1,69E-14  | 7,76E-13  | HMGCS2   |
| ENSGALG000000010841 | 110,200839 | 2,5587632      | 0,33214766 | 7,70369186 | 1,32E-14  | 6,10E-13  |          |
| ENSGALG000000002829 | 649,133449 | 2,553310959    | 0,20495773 | 12,4577442 | 1,27E-35  | 3,20E-33  |          |
| ENSGALG000000021198 | 61,5032288 | 2,552636185    | 0,35110067 | 7,27038252 | 3,58E-13  | 1,39E-11  |          |
| ENSGALG000000015141 | 58,9626486 | 2,548558749    | 0,35207483 | 7,23868481 | 4,53E-13  | 1,74E-11  | GDA      |
| ENSGALG000000005122 | 338,26914  | 2,528381619    | 0,24275499 | 10,415364  | 2,11E-25  | 2,79E-23  | MYO1H    |
| ENSGALG000000010145 | 278,247492 | 2,508391386    | 0,30141971 | 8,3219221  | 8,65E-17  | 5,15E-15  | MDGA1    |
| ENSGALG000000014372 | 67,9784132 | 2,495880293    | 0,34928387 | 7,14570731 | 8,95E-13  | 3,29E-11  | SLC34A2  |
| ENSGALG000000029144 | 72,3286127 | 2,46980754     | 0,34882621 | 7,08033811 | 1,44E-12  | 5,17E-11  |          |
| ENSGALG000000021399 | 89,3295109 | 2,464358792    | 0,33686101 | 7,31565468 | 2,56E-13  | 1,01E-11  |          |
| ENSGALG000000001111 | 752,305162 | 2,451755117    | 0,21130589 | 11,6028718 | 3,98E-31  | 7,64E-29  |          |
| ENSGALG000000012985 | 261,612669 | 2,44205884     | 0,26586807 | 9,18522799 | 4,11E-20  | 3,39E-18  | SLC6A13  |
| ENSGALG000000008105 | 47,87761   | 2,404806479    | 0,35395793 | 6,79404614 | 1,09E-11  | 3,44E-10  |          |

|                     |            |             |            |            |          |          |          |
|---------------------|------------|-------------|------------|------------|----------|----------|----------|
| ENSGALG000000012812 | 176,061446 | 2,39422427  | 0,29597013 | 8,08941196 | 6,00E-16 | 3,29E-14 | SVOPL    |
| ENSGALG000000002638 | 117,914057 | 2,388124012 | 0,32831388 | 7,27390518 | 3,49E-13 | 1,35E-11 |          |
| ENSGALG000000002318 | 63,4096631 | 2,376044719 | 0,3494777  | 6,79884494 | 1,05E-11 | 3,33E-10 | LVRN     |
| ENSGALG000000002015 | 214,323208 | 2,374226325 | 0,28640932 | 8,28962651 | 1,14E-16 | 6,72E-15 |          |
| ENSGALG000000026256 | 199,837668 | 2,357924834 | 0,33320574 | 7,0764832  | 1,48E-12 | 5,30E-11 |          |
| ENSGALG000000007395 | 402,677514 | 2,356587415 | 0,22616715 | 10,4196716 | 2,02E-25 | 2,69E-23 | ABCC2    |
| ENSGALG000000002046 | 463,721693 | 2,341658671 | 0,24228891 | 9,66473716 | 4,26E-22 | 3,97E-20 |          |
| ENSGALG000000007340 | 53,630639  | 2,338672246 | 0,3529687  | 6,62572131 | 3,46E-11 | 1,01E-09 |          |
| ENSGALG000000023934 | 52,5759497 | 2,337998666 | 0,35383511 | 6,60759382 | 3,91E-11 | 1,12E-09 |          |
| ENSGALG000000028341 | 324,387866 | 2,327426751 | 0,23601987 | 9,86114768 | 6,13E-23 | 6,23E-21 |          |
| ENSGALG000000002260 | 279,413842 | 2,326075861 | 0,254913   | 9,12497939 | 7,17E-20 | 5,71E-18 | CISH     |
| ENSGALG000000006402 | 199,281869 | 2,315345967 | 0,27769375 | 8,33776765 | 7,57E-17 | 4,56E-15 |          |
| ENSGALG000000008709 | 98,4372913 | 2,291854243 | 0,32683951 | 7,0121701  | 2,35E-12 | 8,17E-11 | MCOLN3   |
| ENSGALG000000013006 | 357,98483  | 2,275189997 | 0,25794845 | 8,8203283  | 1,14E-18 | 8,05E-17 | ROPN1L   |
| ENSGALG000000006992 | 182,223575 | 2,270300547 | 0,29844555 | 7,60708468 | 2,80E-14 | 1,27E-12 | MMP9     |
| ENSGALG000000011113 | 527,000372 | 2,26759493  | 0,2713629  | 8,35631896 | 6,47E-17 | 3,93E-15 | SGIP1    |
| ENSGALG000000023577 | 321,7197   | 2,257832359 | 0,26699218 | 8,45654861 | 2,75E-17 | 1,74E-15 |          |
| ENSGALG000000016852 | 56,0309211 | 2,256531595 | 0,35169224 | 6,41621099 | 1,40E-10 | 3,74E-09 |          |
| ENSGALG000000027617 | 219,458041 | 2,255993416 | 0,28513386 | 7,91205035 | 2,53E-15 | 1,25E-13 |          |
| ENSGALG000000003677 | 113,607816 | 2,250263529 | 0,34495968 | 6,52326543 | 6,88E-11 | 1,92E-09 | NTNG2    |
| ENSGALG000000023742 | 249,604133 | 2,24719921  | 0,28204891 | 7,96740977 | 1,62E-15 | 8,26E-14 |          |
| ENSGALG000000001589 | 111,257666 | 2,246033051 | 0,34415728 | 6,52618204 | 6,75E-11 | 1,89E-09 |          |
| ENSGALG000000016369 | 952,122279 | 2,242110682 | 0,1770401  | 12,6644225 | 9,31E-37 | 2,54E-34 |          |
| ENSGALG000000027703 | 404,868805 | 2,238234147 | 0,25355456 | 8,82742624 | 1,07E-18 | 7,64E-17 |          |
| ENSGALG000000003389 | 248,600828 | 2,230534118 | 0,27052364 | 8,24524646 | 1,65E-16 | 9,51E-15 |          |
| ENSGALG000000015244 | 123,748282 | 2,228224412 | 0,32046392 | 6,95312109 | 3,57E-12 | 1,20E-10 | TBX19    |
| ENSGALG000000001857 | 255,91037  | 2,203449137 | 0,25950427 | 8,49099387 | 2,05E-17 | 1,31E-15 | FAM132A  |
| ENSGALG000000019861 | 47,6042668 | 2,196772492 | 0,35394524 | 6,2065321  | 5,42E-10 | 1,33E-08 |          |
| ENSGALG000000008514 | 959,211971 | 2,19329695  | 0,17694652 | 12,3952535 | 2,77E-35 | 6,86E-33 | DLL4     |
| ENSGALG000000021714 | 88,4059279 | 2,185372855 | 0,33433945 | 6,53638944 | 6,30E-11 | 1,78E-09 |          |
| ENSGALG000000009499 | 136,985306 | 2,185164296 | 0,31520463 | 6,93252602 | 4,13E-12 | 1,37E-10 | NPY5R    |
| ENSGALG000000026467 | 67,1746865 | 2,184133106 | 0,34748728 | 6,28550519 | 3,27E-10 | 8,22E-09 |          |
| ENSGALG000000027532 | 181,565157 | 2,181261094 | 0,33533315 | 6,50475832 | 7,78E-11 | 2,16E-09 |          |
| ENSGALG000000002817 | 43,7219895 | 2,174112777 | 0,35312942 | 6,15670254 | 7,43E-10 | 1,79E-08 |          |
| ENSGALG000000028339 | 572,220786 | 2,143746023 | 0,25356336 | 8,45447874 | 2,80E-17 | 1,76E-15 |          |
| ENSGALG000000003548 | 717,979314 | 2,131798574 | 0,1846233  | 11,546747  | 7,67E-31 | 1,43E-28 | BAIAP2L1 |
| ENSGALG000000029168 | 574,122828 | 2,125452005 | 0,26338005 | 8,06990504 | 7,04E-16 | 3,85E-14 | TMEM27   |
| ENSGALG000000005062 | 695,377154 | 2,112402161 | 0,18917938 | 11,1661333 | 5,97E-29 | 9,35E-27 | FoxN4    |
| ENSGALG000000001879 | 730,682744 | 2,106018407 | 0,18389159 | 11,4524996 | 2,28E-30 | 4,04E-28 |          |
| ENSGALG000000028551 | 2508,94496 | 2,105237568 | 0,17723341 | 11,8783337 | 1,53E-32 | 3,32E-30 |          |
| ENSGALG000000001696 | 267,698482 | 2,102610472 | 0,25640045 | 8,20049448 | 2,39E-16 | 1,36E-14 | SAG      |
| ENSGALG000000008275 | 48,5714847 | 2,098791425 | 0,35395495 | 5,92954394 | 3,04E-09 | 6,67E-08 |          |
| ENSGALG000000021567 | 284,86115  | 2,081191963 | 0,24661499 | 8,43903259 | 3,20E-17 | 1,99E-15 | EPHA8    |
| ENSGALG000000001874 | 67,2449867 | 2,080511409 | 0,35389195 | 5,87894534 | 4,13E-09 | 8,88E-08 |          |
| ENSGALG000000028654 | 92,9286403 | 2,074935686 | 0,34576621 | 6,00097882 | 1,96E-09 | 4,45E-08 |          |
| ENSGALG000000006260 | 56,9564609 | 2,062296513 | 0,3527945  | 5,84560272 | 5,05E-09 | 1,06E-07 | KLHL30   |
| ENSGALG000000007570 | 256,243886 | 2,055518081 | 0,25713147 | 7,99403557 | 1,31E-15 | 6,73E-14 |          |
| ENSGALG000000019527 | 38,8970283 | 2,052781357 | 0,35219468 | 5,82854162 | 5,59E-09 | 1,16E-07 | SLC6A19  |
| ENSGALG000000000656 | 95,7621403 | 2,036711968 | 0,34147678 | 5,96442297 | 2,46E-09 | 5,51E-08 |          |
| ENSGALG000000007104 | 125,617756 | 2,032418742 | 0,32005632 | 6,35019094 | 2,15E-10 | 5,59E-09 |          |
| ENSGALG000000026541 | 175,990929 | 2,028653787 | 0,29769667 | 6,81449952 | 9,46E-12 | 3,00E-10 |          |
| ENSGALG000000014203 | 138,123283 | 2,025939839 | 0,30058823 | 6,7399175  | 1,58E-11 | 4,87E-10 | PARVG    |
| ENSGALG000000020195 | 143,592197 | 2,021370929 | 0,30337177 | 6,66301589 | 2,68E-11 | 7,92E-10 |          |
| ENSGALG000000012204 | 102,979277 | 2,019423041 | 0,32821004 | 6,1528374  | 7,61E-10 | 1,83E-08 |          |
| ENSGALG000000005797 | 87,7942641 | 2,014484064 | 0,33418994 | 6,02796146 | 1,66E-09 | 3,83E-08 | COL20A1  |
| ENSGALG000000000437 | 37,0932943 | 2,013731373 | 0,35182907 | 5,72360709 | 1,04E-08 | 2,04E-07 |          |
| ENSGALG000000002931 | 53,6926993 | 2,013598707 | 0,3534025  | 5,69774883 | 1,21E-08 | 2,37E-07 |          |
| ENSGALG000000006273 | 107,39879  | 2,011386223 | 0,32297819 | 6,22762252 | 4,74E-10 | 1,16E-08 | MYLK2    |
| ENSGALG000000000722 | 46,5643306 | 2,006522785 | 0,35375492 | 5,67207026 | 1,41E-08 | 2,72E-07 |          |
| ENSGALG000000028147 | 229,824659 | 2,001096858 | 0,26643674 | 7,51058915 | 5,89E-14 | 2,49E-12 | CTSK     |
| ENSGALG000000004248 | 56,9012525 | 1,998749091 | 0,35206496 | 5,67721676 | 1,37E-08 | 2,65E-07 | TACR2    |
| ENSGALG000000003075 | 93,0788327 | 1,997443704 | 0,3325728  | 6,0060344  | 1,90E-09 | 4,34E-08 | SLC34A1  |

|                    |            |             |            |            |          |          |         |
|--------------------|------------|-------------|------------|------------|----------|----------|---------|
| ENSGALG00000001571 | 57,1169097 | 1,994083312 | 0,35177003 | 5,66871286 | 1,44E-08 | 2,77E-07 | MYO1F   |
| ENSGALG00000010458 | 184,378204 | 1,990178775 | 0,28021881 | 7,10223132 | 1,23E-12 | 4,45E-11 |         |
| ENSGALG00000011889 | 230,923015 | 1,988400853 | 0,26765629 | 7,42893376 | 1,09E-13 | 4,48E-12 | PRKCH   |
| ENSGALG00000010924 | 209,968742 | 1,986898996 | 0,28742319 | 6,91279987 | 4,75E-12 | 1,56E-10 | cNFI-A  |
| ENSGALG00000015846 | 313,730622 | 1,982793598 | 0,24658548 | 8,04099914 | 8,91E-16 | 4,78E-14 | SNAP91  |
| ENSGALG00000006835 | 112,628775 | 1,974805269 | 0,3171624  | 6,22647971 | 4,77E-10 | 1,17E-08 | TNNC2   |
| ENSGALG00000013253 | 157,862049 | 1,972349113 | 0,31981557 | 6,16714546 | 6,95E-10 | 1,68E-08 | INSRR   |
| ENSGALG00000009302 | 367,162682 | 1,971912015 | 0,28798838 | 6,84719294 | 7,53E-12 | 2,42E-10 | EMX2    |
| ENSGALG00000004414 | 101,957841 | 1,959564216 | 0,32123225 | 6,10014788 | 1,06E-09 | 2,50E-08 |         |
| ENSGALG00000009489 | 127,740493 | 1,956908773 | 0,32047595 | 6,1062578  | 1,02E-09 | 2,42E-08 |         |
| ENSGALG00000005822 | 147,056462 | 1,951526015 | 0,30270273 | 6,44700496 | 1,14E-10 | 3,07E-09 | KCNQ2   |
| ENSGALG00000027147 | 228,058252 | 1,950896881 | 0,28014131 | 6,96397433 | 3,31E-12 | 1,13E-10 |         |
| ENSGALG00000021869 | 645,941994 | 1,950468731 | 0,24355446 | 8,00834733 | 1,16E-15 | 6,04E-14 | PODN    |
| ENSGALG00000028975 | 532,930635 | 1,945491073 | 0,20584343 | 9,45131484 | 3,35E-21 | 2,90E-19 |         |
| ENSGALG00000007666 | 61,9703125 | 1,945055405 | 0,35143193 | 5,53465757 | 3,12E-08 | 5,56E-07 | KCHIP2  |
| ENSGALG00000021656 | 37,5118215 | 1,943986445 | 0,3507973  | 5,5416231  | 3,00E-08 | 5,37E-07 | PTPN22  |
| ENSGALG00000008188 | 164,942808 | 1,939910796 | 0,29070864 | 6,67304152 | 2,51E-11 | 7,46E-10 | TRIM36  |
| ENSGALG00000010362 | 56,1305671 | 1,930559856 | 0,35381555 | 5,45640199 | 4,86E-08 | 8,33E-07 |         |
| ENSGALG00000000560 | 58,7581666 | 1,925570368 | 0,35333497 | 5,44970217 | 5,05E-08 | 8,61E-07 |         |
| ENSGALG00000015021 | 44,6818444 | 1,923323022 | 0,35395775 | 5,43376434 | 5,52E-08 | 9,36E-07 | TMEM174 |
| ENSGALG00000015551 | 1931,12818 | 1,921428632 | 0,17206371 | 11,1669603 | 5,92E-29 | 9,35E-27 | GRIN3A  |
| ENSGALG00000010867 | 80,2669926 | 1,919026004 | 0,34078038 | 5,63126911 | 1,79E-08 | 3,37E-07 | TACSTD2 |
| ENSGALG00000001004 | 271,271449 | 1,914258624 | 0,25960686 | 7,37368273 | 1,66E-13 | 6,69E-12 |         |
| ENSGALG00000011347 | 48,911798  | 1,909599526 | 0,35390611 | 5,39578011 | 6,82E-08 | 1,14E-06 | IHH     |
| ENSGALG00000006413 | 117,165789 | 1,90767902  | 0,31128952 | 6,12831113 | 8,88E-10 | 2,11E-08 | CEMIP   |
| ENSGALG00000003836 | 138,248419 | 1,907173269 | 0,34505436 | 5,52716754 | 3,25E-08 | 5,78E-07 |         |
| ENSGALG00000007345 | 111,972561 | 1,905774604 | 0,32456789 | 5,87172866 | 4,31E-09 | 9,20E-08 |         |
| ENSGALG00000008701 | 97,1365525 | 1,905747917 | 0,3400514  | 5,60429376 | 2,09E-08 | 3,87E-07 | XDH     |
| ENSGALG00000010853 | 484,768782 | 1,904256394 | 0,21726773 | 8,76456169 | 1,88E-18 | 1,29E-16 | C8B     |
| ENSGALG00000000221 | 51,6768021 | 1,900065815 | 0,35396003 | 5,3680237  | 7,96E-08 | 1,31E-06 |         |
| ENSGALG00000001617 | 1078,32932 | 1,898502237 | 0,21231379 | 8,9419639  | 3,82E-19 | 2,86E-17 | CAMKK1  |
| ENSGALG00000019290 | 78,1238371 | 1,892925943 | 0,34969839 | 5,41302448 | 6,20E-08 | 1,04E-06 | SLC6A12 |
| ENSGALG00000009265 | 88,1743252 | 1,891791729 | 0,34591457 | 5,46895654 | 4,53E-08 | 7,80E-07 | KCNK18  |
| ENSGALG00000003923 | 2335,33874 | 1,889033194 | 0,15037048 | 12,5625268 | 3,39E-36 | 8,88E-34 | COL6A3  |
| ENSGALG00000008995 | 104,546365 | 1,882652598 | 0,3282959  | 5,73462107 | 9,77E-09 | 1,93E-07 |         |
| ENSGALG00000000544 | 347,726242 | 1,877518925 | 0,23287565 | 8,06232383 | 7,49E-16 | 4,08E-14 | RAB44   |
| ENSGALG00000007706 | 86,703491  | 1,877381913 | 0,33476816 | 5,60800615 | 2,05E-08 | 3,82E-07 | FGF8    |
| ENSGALG00000015347 | 73,1732063 | 1,876981559 | 0,34452788 | 5,44798159 | 5,09E-08 | 8,66E-07 | ZPLD1   |
| ENSGALG00000009078 | 124,066106 | 1,868595491 | 0,33382944 | 5,59745563 | 2,18E-08 | 4,01E-07 | GALNT14 |
| ENSGALG00000000899 | 303,594278 | 1,867380532 | 0,25292797 | 7,38305256 | 1,55E-13 | 6,29E-12 |         |
| ENSGALG00000023459 | 62,5233629 | 1,863475253 | 0,35063414 | 5,31458595 | 1,07E-07 | 1,71E-06 |         |
| ENSGALG00000013953 | 153,510812 | 1,853929495 | 0,31615798 | 5,86393381 | 4,52E-09 | 9,60E-08 |         |
| ENSGALG00000020316 | 66,9879377 | 1,852228829 | 0,34370538 | 5,38900158 | 7,09E-08 | 1,17E-06 | IL13RA2 |
| ENSGALG00000014770 | 4689,68364 | 1,850573228 | 0,19171766 | 9,65259643 | 4,79E-22 | 4,41E-20 |         |
| ENSGALG00000015406 | 32,8242769 | 1,850052547 | 0,34954162 | 5,29279624 | 1,20E-07 | 1,90E-06 |         |
| ENSGALG00000007047 | 78,9873557 | 1,844593336 | 0,3380656  | 5,4563178  | 4,86E-08 | 8,33E-07 | GAL     |
| ENSGALG00000011421 | 155,787271 | 1,840566258 | 0,29419428 | 6,25629526 | 3,94E-10 | 9,81E-09 | HAL     |
| ENSGALG00000003751 | 52,9480261 | 1,835104614 | 0,35380373 | 5,18678703 | 2,14E-07 | 3,22E-06 |         |
| ENSGALG00000021693 | 69,3129231 | 1,830329106 | 0,34305164 | 5,33543326 | 9,53E-08 | 1,54E-06 |         |
| ENSGALG00000005634 | 92,2321464 | 1,826798031 | 0,32741142 | 5,57951828 | 2,41E-08 | 4,40E-07 | CRYBA4  |
| ENSGALG00000005644 | 54,6398918 | 1,819377424 | 0,3504577  | 5,19143234 | 2,09E-07 | 3,15E-06 | MYO1G   |
| ENSGALG00000029006 | 89,8196778 | 1,803532169 | 0,3296621  | 5,47085084 | 4,48E-08 | 7,73E-07 | SYPL1   |
| ENSGALG00000010126 | 116,195874 | 1,799221778 | 0,32988987 | 5,4540074  | 4,92E-08 | 8,42E-07 |         |
| ENSGALG00000019361 | 44,228613  | 1,792121861 | 0,35385967 | 5,06449882 | 4,09E-07 | 5,78E-06 | FAM19A2 |
| ENSGALG00000020982 | 53,8722608 | 1,789263062 | 0,35132044 | 5,09296598 | 3,53E-07 | 5,05E-06 |         |
| ENSGALG00000004841 | 236,709128 | 1,788099107 | 0,27635881 | 6,47020836 | 9,79E-11 | 2,66E-09 | APLNR   |
| ENSGALG00000008845 | 211,090699 | 1,784489653 | 0,26979829 | 6,61416227 | 3,74E-11 | 1,08E-09 | HAO1    |
| ENSGALG00000023354 | 87,3213221 | 1,782015396 | 0,34472234 | 5,16942237 | 2,35E-07 | 3,49E-06 | FSCN2   |
| ENSGALG00000010364 | 75,7123588 | 1,777216343 | 0,34965008 | 5,08284262 | 3,72E-07 | 5,29E-06 |         |
| ENSGALG00000027090 | 122,235387 | 1,772101833 | 0,32386305 | 5,47176288 | 4,46E-08 | 7,70E-07 |         |
| ENSGALG00000005043 | 168,034499 | 1,771501032 | 0,28869817 | 6,13617001 | 8,45E-10 | 2,02E-08 | ACACB   |
| ENSGALG00000005747 | 39,0007429 | 1,767653479 | 0,35360417 | 4,99896104 | 5,76E-07 | 7,89E-06 |         |

|                    |            |             |            |            |          |          |          |
|--------------------|------------|-------------|------------|------------|----------|----------|----------|
| ENSGALG00000014252 | 107,135531 | 1,765576737 | 0,34633901 | 5,09782814 | 3,44E-07 | 4,94E-06 |          |
| ENSGALG00000006007 | 80,5203103 | 1,763247242 | 0,34316546 | 5,13818391 | 2,77E-07 | 4,06E-06 | SAMD10   |
| ENSGALG00000000630 | 44,9860229 | 1,762139369 | 0,35277196 | 4,99512312 | 5,88E-07 | 8,02E-06 | HAS3     |
| ENSGALG00000013971 | 623,626799 | 1,754983652 | 0,22177863 | 7,91322269 | 2,51E-15 | 1,24E-13 | SGK1     |
| ENSGALG00000025804 | 57,8298229 | 1,753854275 | 0,34868015 | 5,02998031 | 4,91E-07 | 6,84E-06 | CLCN2    |
| ENSGALG00000016233 | 282,390757 | 1,751740847 | 0,25916092 | 6,75927863 | 1,39E-11 | 4,28E-10 |          |
| ENSGALG00000000299 | 146,622524 | 1,750555222 | 0,31737522 | 5,5157274  | 3,47E-08 | 6,13E-07 | PKP1     |
| ENSGALG00000015154 | 107,544575 | 1,749162012 | 0,31926267 | 5,47875512 | 4,28E-08 | 7,43E-07 | TRPM6    |
| ENSGALG00000028801 | 326,04496  | 1,749152851 | 0,23171525 | 7,54871702 | 4,40E-14 | 1,90E-12 | YPEL2    |
| ENSGALG00000003103 | 147,012955 | 1,745350116 | 0,2934725  | 5,94723559 | 2,73E-09 | 6,09E-08 | MST1R    |
| ENSGALG00000010408 | 48,6937618 | 1,74244975  | 0,35251743 | 4,94287544 | 7,70E-07 | 1,02E-05 |          |
| ENSGALG00000016580 | 156,416853 | 1,740943756 | 0,31375774 | 5,54868778 | 2,88E-08 | 5,20E-07 | SCARA5   |
| ENSGALG00000020779 | 287,434053 | 1,737619419 | 0,24470316 | 7,10092768 | 1,24E-12 | 4,48E-11 |          |
| ENSGALG00000015544 | 64,576519  | 1,719200832 | 0,35119647 | 4,89526802 | 9,82E-07 | 1,28E-05 | ALDOB    |
| ENSGALG00000015305 | 121,835301 | 1,715527315 | 0,30924605 | 5,547451   | 2,90E-08 | 5,21E-07 | NR2E1    |
| ENSGALG00000008926 | 1594,75407 | 1,713961304 | 0,15633781 | 10,9631913 | 5,74E-28 | 8,69E-26 | CADPS2   |
| ENSGALG00000002957 | 403,400084 | 1,713056332 | 0,23618065 | 7,25316116 | 4,07E-13 | 1,57E-11 | SLC12A3  |
| ENSGALG00000017212 | 76,5473495 | 1,710911672 | 0,34240676 | 4,9967228  | 5,83E-07 | 7,97E-06 | GPR83    |
| ENSGALG00000004827 | 60,764569  | 1,70800582  | 0,34662638 | 4,92751255 | 8,33E-07 | 1,10E-05 |          |
| ENSGALG00000003242 | 570,220114 | 1,707949225 | 0,21013146 | 8,12800356 | 4,36E-16 | 2,42E-14 | STAR     |
| ENSGALG00000001912 | 146,494381 | 1,699528733 | 0,30128418 | 5,64094911 | 1,69E-08 | 3,21E-07 |          |
| ENSGALG00000003003 | 42,6697686 | 1,694427776 | 0,35203153 | 4,81328409 | 1,48E-06 | 1,86E-05 | CCL20    |
| ENSGALG00000016261 | 158,706658 | 1,693178751 | 0,31450243 | 5,38367466 | 7,30E-08 | 1,20E-06 | CYBB     |
| ENSGALG00000011007 | 1150,32901 | 1,688733669 | 0,19077647 | 8,85189717 | 8,60E-19 | 6,20E-17 | OSBPL3   |
| ENSGALG00000015117 | 149,514374 | 1,688648354 | 0,29548541 | 5,71482827 | 1,10E-08 | 2,15E-07 | DRD3     |
| ENSGALG00000012429 | 6013,8279  | 1,680823476 | 0,15201043 | 11,0572901 | 2,02E-28 | 3,09E-26 | BMP4     |
| ENSGALG00000000458 | 427,66514  | 1,679795969 | 0,21744886 | 7,72501627 | 1,12E-14 | 5,20E-13 | TMPRSS9  |
| ENSGALG00000011622 | 28,6515601 | 1,67904306  | 0,34603089 | 4,85229247 | 1,22E-06 | 1,56E-05 |          |
| ENSGALG00000016572 | 77,2006942 | 1,678816771 | 0,34344316 | 4,88819394 | 1,02E-06 | 1,32E-05 |          |
| ENSGALG00000001084 | 353,564869 | 1,677708871 | 0,24186887 | 6,93643975 | 4,02E-12 | 1,34E-10 | ATP8B3   |
| ENSGALG00000026473 | 1522,15108 | 1,674638021 | 0,21127677 | 7,92627606 | 2,26E-15 | 1,13E-13 |          |
| ENSGALG00000008178 | 111,711666 | 1,67186128  | 0,32258264 | 5,18273795 | 2,19E-07 | 3,28E-06 |          |
| ENSGALG00000005140 | 240,214893 | 1,671709253 | 0,25797704 | 6,48006996 | 9,17E-11 | 2,52E-09 | RRAD     |
| ENSGALG00000001234 | 40,8626534 | 1,668621796 | 0,35391846 | 4,7147069  | 2,42E-06 | 2,87E-05 | CETP     |
| ENSGALG00000006514 | 1126,00554 | 1,665636549 | 0,17514671 | 9,50995042 | 1,91E-21 | 1,69E-19 |          |
| ENSGALG00000004936 | 57,472904  | 1,658043102 | 0,34946885 | 4,74446601 | 2,09E-06 | 2,51E-05 | GLRA4    |
| ENSGALG00000028174 | 599,327274 | 1,656109672 | 0,24081026 | 6,87723897 | 6,10E-12 | 1,98E-10 |          |
| ENSGALG00000011882 | 446,567699 | 1,655648124 | 0,21164389 | 7,82280161 | 5,17E-15 | 2,44E-13 |          |
| ENSGALG00000020143 | 148,781899 | 1,654526791 | 0,32189845 | 5,13990289 | 2,75E-07 | 4,02E-06 | GABRG1   |
| ENSGALG00000027314 | 27,9768099 | 1,648583002 | 0,34526179 | 4,77487828 | 1,80E-06 | 2,19E-05 | SAXO1    |
| ENSGALG00000019019 | 89,6714541 | 1,647447024 | 0,34390312 | 4,79043927 | 1,66E-06 | 2,05E-05 | NTRK1    |
| ENSGALG00000026161 | 123,209261 | 1,647025641 | 0,3125278  | 5,27001315 | 1,36E-07 | 2,13E-06 |          |
| ENSGALG00000024298 | 32,0306965 | 1,646495761 | 0,34885964 | 4,71965109 | 2,36E-06 | 2,81E-05 | ADAMTSL5 |
| ENSGALG00000004394 | 167,659182 | 1,640660466 | 0,28374074 | 5,7822521  | 7,37E-09 | 1,49E-07 | PCBP3    |
| ENSGALG00000016262 | 396,403367 | 1,640510999 | 0,22878691 | 7,17047578 | 7,47E-13 | 2,77E-11 | XK       |
| ENSGALG00000015905 | 84,004407  | 1,632452898 | 0,3358609  | 4,86050296 | 1,17E-06 | 1,51E-05 |          |
| ENSGALG00000005293 | 115,927539 | 1,631397185 | 0,32721191 | 4,98575121 | 6,17E-07 | 8,36E-06 |          |
| ENSGALG00000025946 | 137,584784 | 1,630278266 | 0,31187717 | 5,22730883 | 1,72E-07 | 2,64E-06 | MOB3C    |
| ENSGALG00000011806 | 33,3533195 | 1,625032877 | 0,34750572 | 4,67627665 | 2,92E-06 | 3,39E-05 |          |
| ENSGALG00000010721 | 516,489319 | 1,61713725  | 0,19825254 | 8,15695606 | 3,44E-16 | 1,92E-14 |          |
| ENSGALG00000008133 | 122,891283 | 1,61551597  | 0,32520429 | 4,96769575 | 6,78E-07 | 9,10E-06 | AS3MT    |
| ENSGALG00000000820 | 127,586167 | 1,614544959 | 0,31856994 | 5,06810204 | 4,02E-07 | 5,68E-06 | HTR1D    |
| ENSGALG00000002832 | 501,681621 | 1,610990532 | 0,21276938 | 7,57153378 | 3,69E-14 | 1,62E-12 | IFI35    |
| ENSGALG00000006606 | 3620,8517  | 1,610976489 | 0,12247757 | 13,1532366 | 1,63E-39 | 5,29E-37 |          |
| ENSGALG00000011200 | 907,828768 | 1,609360966 | 0,24666698 | 6,52442818 | 6,83E-11 | 1,91E-09 | THBS2    |
| ENSGALG00000007980 | 258,344877 | 1,607363167 | 0,27462432 | 5,85295284 | 4,83E-09 | 1,02E-07 | KCNG1    |
| ENSGALG00000001062 | 680,579051 | 1,606326071 | 0,19183595 | 8,37343595 | 5,60E-17 | 3,43E-15 | GGT7     |
| ENSGALG00000003106 | 661,981272 | 1,604428011 | 0,22228284 | 7,21795705 | 5,28E-13 | 2,01E-11 | TOX2     |
| ENSGALG00000007815 | 333,865811 | 1,603027021 | 0,27971291 | 5,73097251 | 9,99E-09 | 1,96E-07 | ANKK1    |
| ENSGALG00000015366 | 80,0727703 | 1,602600172 | 0,34326453 | 4,66870313 | 3,03E-06 | 3,52E-05 |          |
| ENSGALG00000005725 | 91,1085716 | 1,601523904 | 0,35202702 | 4,54943466 | 5,38E-06 | 5,90E-05 | CSF1R    |
| ENSGALG00000022644 | 26,8742275 | 1,595235245 | 0,34379409 | 4,64008918 | 3,48E-06 | 3,98E-05 |          |

|                     |            |             |            |            |          |            |          |
|---------------------|------------|-------------|------------|------------|----------|------------|----------|
| ENSGALG00000007759  | 856,866355 | 1,594985498 | 0,19890567 | 8,01880348 | 1,07E-15 | 5,57E-14   |          |
| ENSGALG00000008830  | 781,049383 | 1,591806155 | 0,21140245 | 7,52974324 | 5,08E-14 | 2,17E-12   |          |
| ENSGALG00000006412  | 53,0587145 | 1,591456503 | 0,35279252 | 4,51102674 | 6,45E-06 | 6,90E-05   | VGLL1    |
| ENSGALG000000029174 | 5348,15015 | 1,589321167 | 0,12909013 | 12,3117174 | 7,83E-35 | 1,87E-32   |          |
| ENSGALG00000006245  | 402,970032 | 1,589094556 | 0,22775101 | 6,97733278 | 3,01E-12 | 1,04E-10   |          |
| ENSGALG000000026733 | 77,5005998 | 1,588089103 | 0,34066443 | 4,6617403  | 3,14E-06 | 3,62E-05   | FFAR4    |
| ENSGALG000000016138 | 93,2512783 | 1,581494384 | 0,32966262 | 4,79731185 | 1,61E-06 | 2,00E-05   | DSCAM    |
| ENSGALG000000016498 | 94,7917055 | 1,580375213 | 0,32949342 | 4,7963786  | 1,62E-06 | 2,01E-05   | MFSD2B   |
| ENSGALG000000011343 | 80,565753  | 1,579403764 | 0,33480013 | 4,71745272 | 2,39E-06 | 2,83E-05   | CNPPD1   |
| ENSGALG00000000733  | 1063,13098 | 1,578595816 | 0,19876941 | 7,94184501 | 1,99E-15 | 1,00E-13   |          |
| ENSGALG000000028175 | 72,9348346 | 1,575180638 | 0,35396003 | 4,45016529 | 8,58E-06 | 9,01E-05   | GJA9     |
| ENSGALG000000015293 | 333,004659 | 1,574970296 | 0,24444617 | 6,4430147  | 1,17E-10 | 3,15E-09   | TMEM45A  |
| ENSGALG000000012115 | 228,294388 | 1,572479232 | 0,27344667 | 5,75058837 | 8,89E-09 | 1,77E-07   | WT1      |
| ENSGALG00000004692  | 57,025385  | 1,559793633 | 0,35370154 | 4,40991479 | 1,03E-05 | 0,0001064  |          |
| ENSGALG00000005958  | 558,635772 | 1,558583818 | 0,23299183 | 6,68943537 | 2,24E-11 | 6,70E-10   | TRIM66   |
| ENSGALG00000000826  | 97,953466  | 1,551558986 | 0,32368653 | 4,79339992 | 1,64E-06 | 2,03E-05   |          |
| ENSGALG00000007690  | 2070,9973  | 1,54950396  | 0,17555383 | 8,82637523 | 1,08E-18 | 7,67E-17   | TFAP2C   |
| ENSGALG00000006964  | 225,191012 | 1,546629935 | 0,29302707 | 5,27811285 | 1,31E-07 | 2,05E-06   |          |
| ENSGALG00000005967  | 735,636675 | 1,545091384 | 0,22167917 | 6,96994379 | 3,17E-12 | 1,09E-10   |          |
| ENSGALG00000008440  | 429,095272 | 1,543692993 | 0,21647003 | 7,13120884 | 9,95E-13 | 3,64E-11   | CHST1    |
| ENSGALG00000001882  | 38,7098275 | 1,540579881 | 0,35211396 | 4,37523089 | 1,21E-05 | 0,00012243 |          |
| ENSGALG000000015373 | 27,6017686 | 1,538791481 | 0,34451153 | 4,46658922 | 7,95E-06 | 8,37E-05   | PDE6B    |
| ENSGALG000000011577 | 399,56293  | 1,531134988 | 0,21728602 | 7,0466337  | 1,83E-12 | 6,48E-11   | CNTNAP5  |
| ENSGALG000000025774 | 5724,96959 | 1,527733684 | 0,12704021 | 12,0255916 | 2,61E-33 | 5,82E-31   |          |
| ENSGALG00000005473  | 107,686637 | 1,527501434 | 0,32073027 | 4,76257338 | 1,91E-06 | 2,31E-05   |          |
| ENSGALG00000000479  | 244,695616 | 1,527264642 | 0,25520876 | 5,984374   | 2,17E-09 | 4,90E-08   |          |
| ENSGALG000000011071 | 944,33324  | 1,527069671 | 0,16947196 | 9,01075121 | 2,05E-19 | 1,57E-17   |          |
| ENSGALG000000020459 | 25,5154221 | 1,526419374 | 0,34167333 | 4,46748172 | 7,91E-06 | 8,34E-05   |          |
| ENSGALG000000014267 | 99,3352174 | 1,525149591 | 0,31972846 | 4,77014025 | 1,84E-06 | 2,24E-05   | RBM47    |
| ENSGALG00000007803  | 165,807287 | 1,522432144 | 0,29566688 | 5,14914667 | 2,62E-07 | 3,86E-06   |          |
| ENSGALG00000001569  | 88,7153734 | 1,518412601 | 0,34222784 | 4,43684706 | 9,13E-06 | 9,51E-05   | RHOC     |
| ENSGALG000000020745 | 195,274039 | 1,515524715 | 0,27430933 | 5,52487479 | 3,30E-08 | 5,85E-07   | RHO      |
| ENSGALG000000011227 | 778,979814 | 1,515331444 | 0,18180249 | 8,3350423  | 7,75E-17 | 4,65E-15   | CDS1     |
| ENSGALG00000007594  | 126,922974 | 1,512071087 | 0,30201682 | 5,00657906 | 5,54E-07 | 7,63E-06   | ASB12    |
| ENSGALG000000002314 | 85,1314877 | 1,511687395 | 0,33330967 | 4,53538412 | 5,75E-06 | 6,23E-05   | CDHR1    |
| ENSGALG000000002353 | 221,898313 | 1,511078773 | 0,26237238 | 5,75929059 | 8,45E-09 | 1,69E-07   | C1orf216 |
| ENSGALG000000024397 | 46,3770198 | 1,510326295 | 0,3539532  | 4,2670226  | 1,98E-05 | 0,00018598 |          |
| ENSGALG000000023866 | 254,336531 | 1,510055693 | 0,28025871 | 5,38807762 | 7,12E-08 | 1,18E-06   |          |
| ENSGALG000000026089 | 41,8112969 | 1,509966763 | 0,35044188 | 4,30875091 | 1,64E-05 | 0,00015808 | SLC26A6  |
| ENSGALG000000028386 | 982,725203 | 1,507238343 | 0,16997711 | 8,86730176 | 7,49E-19 | 5,49E-17   |          |
| ENSGALG00000006479  | 34,3468527 | 1,50588664  | 0,34819791 | 4,32480087 | 1,53E-05 | 0,00014837 | CCM2L    |
| ENSGALG00000005297  | 304,659703 | 1,505251197 | 0,24557254 | 6,12955833 | 8,81E-10 | 2,10E-08   | HHATL    |
| ENSGALG00000004448  | 547,114848 | 1,504790559 | 0,23230258 | 6,4777179  | 9,31E-11 | 2,55E-09   | BRINP2   |
| ENSGALG000000026983 | 590,103546 | 1,50209184  | 0,21370636 | 7,02876535 | 2,08E-12 | 7,31E-11   | CHRD     |
| ENSGALG000000024264 | 40,6812127 | 1,501303133 | 0,34955904 | 4,2948485  | 1,75E-05 | 0,00016679 |          |
| ENSGALG000000028347 | 76,9725475 | 1,501152953 | 0,34262878 | 4,38128098 | 1,18E-05 | 0,00011917 | SDCBP2   |
| ENSGALG000000016556 | 93,5327309 | 1,500831481 | 0,32530567 | 4,6136038  | 3,96E-06 | 4,47E-05   |          |
| ENSGALG00000008424  | 31,5559973 | 1,500581439 | 0,34950735 | 4,29341889 | 1,76E-05 | 0,00016751 | CALML3   |
| ENSGALG000000016287 | 253,693238 | 1,497802744 | 0,250661   | 5,9754121  | 2,30E-09 | 5,17E-08   |          |
| ENSGALG000000028069 | 276,234024 | 1,497716991 | 0,25564361 | 5,858613   | 4,67E-09 | 9,87E-08   | WNT16    |
| ENSGALG000000015410 | 210,477674 | 1,497100835 | 0,26827858 | 5,58039641 | 2,40E-08 | 4,38E-07   | BVES     |
| ENSGALG000000014074 | 676,433259 | 1,49566297  | 0,19193599 | 7,79250911 | 6,57E-15 | 3,08E-13   |          |
| ENSGALG000000003713 | 62,0071346 | 1,494159857 | 0,34951056 | 4,2750063  | 1,91E-05 | 0,00018034 |          |
| ENSGALG00000007409  | 87,0801504 | 1,493981037 | 0,32899137 | 4,54109494 | 5,60E-06 | 6,09E-05   | SCN4B    |
| ENSGALG000000028823 | 172,118142 | 1,491796906 | 0,2989787  | 4,98964273 | 6,05E-07 | 8,21E-06   |          |
| ENSGALG000000026585 | 53,5711009 | 1,487448109 | 0,3507492  | 4,24077402 | 2,23E-05 | 0,00020575 |          |
| ENSGALG000000027548 | 35,7639328 | 1,48608799  | 0,3490327  | 4,25773286 | 2,07E-05 | 0,00019271 |          |
| ENSGALG000000028770 | 169,214437 | 1,483894729 | 0,30979476 | 4,78992848 | 1,67E-06 | 2,06E-05   | INHBB    |
| ENSGALG000000015237 | 27,2937688 | 1,481694783 | 0,34447168 | 4,30135446 | 1,70E-05 | 0,00016265 | PPIL6    |
| ENSGALG000000015084 | 1284,76928 | 1,480304896 | 0,18534154 | 7,98690291 | 1,38E-15 | 7,11E-14   | IGSF11   |
| ENSGALG000000027357 | 83,3635346 | 1,478068348 | 0,33426191 | 4,4218869  | 9,78E-06 | 0,000101   |          |
| ENSGALG00000007908  | 523,875729 | 1,477721596 | 0,21194377 | 6,97223428 | 3,12E-12 | 1,08E-10   |          |

|                    |            |             |            |            |          |            |         |
|--------------------|------------|-------------|------------|------------|----------|------------|---------|
| ENSGALG00000008888 | 216,095633 | 1,475198435 | 0,26634382 | 5,5386996  | 3,05E-08 | 5,45E-07   |         |
| ENSGALG00000000984 | 31,631294  | 1,47391651  | 0,3504148  | 4,2062051  | 2,60E-05 | 0,00023462 |         |
| ENSGALG00000007862 | 431,761835 | 1,47265082  | 0,23340463 | 6,30943289 | 2,80E-10 | 7,11E-09   | CNTN3   |
| ENSGALG00000016538 | 1671,27665 | 1,472170836 | 0,14445232 | 10,1913963 | 2,17E-24 | 2,59E-22   | RAI2    |
| ENSGALG00000002442 | 183,2009   | 1,464263461 | 0,28517222 | 5,13466379 | 2,83E-07 | 4,12E-06   | ANKS4B  |
| ENSGALG00000010107 | 1860,62891 | 1,462273804 | 0,14178721 | 10,3131576 | 6,14E-25 | 7,75E-23   |         |
| ENSGALG00000026677 | 510,78911  | 1,461550873 | 0,27216608 | 5,37006991 | 7,87E-08 | 1,29E-06   | F10     |
| ENSGALG00000000703 | 748,407891 | 1,459568013 | 0,22886918 | 6,37730267 | 1,80E-10 | 4,77E-09   | SLC45A3 |
| ENSGALG00000026069 | 33,9757189 | 1,459502097 | 0,34690094 | 4,20725901 | 2,58E-05 | 0,00023392 |         |
| ENSGALG00000001319 | 188,5387   | 1,458388464 | 0,27459113 | 5,31112739 | 1,09E-07 | 1,73E-06   | CAMK1G  |
| ENSGALG00000014297 | 511,060783 | 1,457150717 | 0,20851139 | 6,98835066 | 2,78E-12 | 9,64E-11   | IRF7    |
| ENSGALG00000004565 | 123,010215 | 1,456247274 | 0,33891637 | 4,29677471 | 1,73E-05 | 0,00016569 |         |
| ENSGALG00000010024 | 105,10355  | 1,453185654 | 0,31957147 | 4,5472947  | 5,43E-06 | 5,94E-05   |         |
| ENSGALG00000014941 | 729,891458 | 1,451697765 | 0,1864124  | 7,78756017 | 6,83E-15 | 3,20E-13   |         |
| ENSGALG00000018878 | 40,6695287 | 1,44967545  | 0,35380851 | 4,09734482 | 4,18E-05 | 0,00035297 |         |
| ENSGALG00000015128 | 44,3465543 | 1,44940013  | 0,35395981 | 4,09481559 | 4,23E-05 | 0,00035587 | AQP4    |
| ENSGALG00000006751 | 459,348637 | 1,449311054 | 0,21417443 | 6,76696594 | 1,32E-11 | 4,09E-10   | THY1    |
| ENSGALG00000017041 | 876,052013 | 1,44806939  | 0,20136843 | 7,19114421 | 6,43E-13 | 2,41E-11   |         |
| ENSGALG00000007211 | 323,240319 | 1,44654086  | 0,24592568 | 5,88202449 | 4,05E-09 | 8,74E-08   | CDH22   |
| ENSGALG00000001727 | 728,893661 | 1,445847057 | 0,18026579 | 8,02064026 | 1,05E-15 | 5,52E-14   | LZTS1   |
| ENSGALG00000006239 | 29,3987017 | 1,443346989 | 0,34917352 | 4,13360955 | 3,57E-05 | 0,00030929 |         |
| ENSGALG00000023395 | 151,597821 | 1,441830671 | 0,29992743 | 4,80726505 | 1,53E-06 | 1,91E-05   | PLIN1   |
| ENSGALG00000013640 | 91,8229663 | 1,440450208 | 0,32437446 | 4,44070167 | 8,97E-06 | 9,38E-05   |         |
| ENSGALG00000014962 | 26,4645058 | 1,440003001 | 0,34319536 | 4,19586969 | 2,72E-05 | 0,00024358 | FAM26F  |
| ENSGALG00000008267 | 52,9646856 | 1,439464257 | 0,35338111 | 4,07340464 | 4,63E-05 | 0,0003844  | IL5RA   |
| ENSGALG00000011202 | 37,1408249 | 1,438867662 | 0,3522352  | 4,08496273 | 4,41E-05 | 0,00036755 | COLQ    |
| ENSGALG00000012652 | 778,180225 | 1,438231617 | 0,2169215  | 6,63019384 | 3,35E-11 | 9,79E-10   |         |
| ENSGALG00000001710 | 36,6972134 | 1,437606263 | 0,3472289  | 4,14022641 | 3,47E-05 | 0,00030127 |         |
| ENSGALG00000014695 | 237,142454 | 1,436054042 | 0,28464919 | 5,0449961  | 4,54E-07 | 6,35E-06   | CLCN1   |
| ENSGALG00000024368 | 80,858185  | 1,435967902 | 0,33830768 | 4,24456188 | 2,19E-05 | 0,00020286 |         |
| ENSGALG00000003678 | 3218,39181 | 1,429238494 | 0,12475534 | 11,4563312 | 2,19E-30 | 3,97E-28   |         |
| ENSGALG00000012313 | 84,3836892 | 1,428353126 | 0,34635998 | 4,1238977  | 3,73E-05 | 0,00031938 |         |
| ENSGALG00000000914 | 24,8181662 | 1,42659313  | 0,3378824  | 4,22215874 | 2,42E-05 | 0,00022111 |         |
| ENSGALG00000006565 | 175,499575 | 1,424795357 | 0,32613752 | 4,36869506 | 1,25E-05 | 0,00012543 |         |
| ENSGALG00000011888 | 40,65783   | 1,420709802 | 0,353895   | 4,01449525 | 5,96E-05 | 0,00047852 |         |
| ENSGALG00000010213 | 97,7805158 | 1,420151903 | 0,3251042  | 4,36829761 | 1,25E-05 | 0,00012548 |         |
| ENSGALG00000008901 | 121,607035 | 1,417468594 | 0,30853867 | 4,59413595 | 4,35E-06 | 4,87E-05   | FP      |
| ENSGALG00000009596 | 108,17405  | 1,416089625 | 0,32143686 | 4,40549862 | 1,06E-05 | 0,00010813 | TMEM117 |
| ENSGALG00000014412 | 49,0629688 | 1,415817045 | 0,35185351 | 4,02388215 | 5,72E-05 | 0,00046283 | CSTA    |
| ENSGALG00000000589 | 81,385408  | 1,415474788 | 0,33862107 | 4,18011435 | 2,91E-05 | 0,00025877 |         |
| ENSGALG00000023834 | 58,0264688 | 1,413727582 | 0,35080504 | 4,02995233 | 5,58E-05 | 0,00045266 |         |
| ENSGALG00000018998 | 220,946842 | 1,412120959 | 0,28106361 | 5,02420412 | 5,06E-07 | 7,03E-06   |         |
| ENSGALG00000013081 | 81,6196368 | 1,411618895 | 0,34436277 | 4,09922035 | 4,15E-05 | 0,00035078 | VWC2    |
| ENSGALG00000027520 | 176,34242  | 1,409426755 | 0,294554   | 4,78495208 | 1,71E-06 | 2,10E-05   |         |
| ENSGALG00000020423 | 91,6730687 | 1,409349068 | 0,34445303 | 4,09155661 | 4,28E-05 | 0,00035977 |         |
| ENSGALG00000026957 | 482,71907  | 1,407844107 | 0,20929005 | 6,72676095 | 1,73E-11 | 5,28E-10   | SEMA4G  |
| ENSGALG00000010486 | 221,460325 | 1,406315246 | 0,26026568 | 5,40338331 | 6,54E-08 | 1,10E-06   |         |
| ENSGALG00000028936 | 318,091175 | 1,405167114 | 0,23410156 | 6,0023824  | 1,94E-09 | 4,43E-08   |         |
| ENSGALG00000002637 | 48,9524533 | 1,404353552 | 0,35337987 | 3,97406211 | 7,07E-05 | 0,00055575 | RBP7    |
| ENSGALG00000026948 | 265,898108 | 1,40406892  | 0,28394262 | 4,94490374 | 7,62E-07 | 1,01E-05   | ADD2    |
| ENSGALG00000016782 | 106,880394 | 1,400781577 | 0,32848891 | 4,26431921 | 2,01E-05 | 0,00018802 |         |
| ENSGALG00000015918 | 313,695882 | 1,399804901 | 0,23804553 | 5,88040816 | 4,09E-09 | 8,82E-08   |         |
| ENSGALG00000011594 | 42,2108128 | 1,39976735  | 0,35390556 | 3,95520025 | 7,65E-05 | 0,00059291 | NR1H4   |
| ENSGALG00000009390 | 538,734312 | 1,398258988 | 0,20555082 | 6,80249786 | 1,03E-11 | 3,26E-10   |         |
| ENSGALG00000004252 | 60,1197029 | 1,3977567   | 0,34729606 | 4,02468343 | 5,71E-05 | 0,00046153 |         |
| ENSGALG00000019864 | 58,8923664 | 1,392548079 | 0,34877295 | 3,9927067  | 6,53E-05 | 0,00051768 |         |
| ENSGALG00000029083 | 179,607144 | 1,390642479 | 0,28146869 | 4,94066488 | 7,79E-07 | 1,03E-05   | NXPH2   |
| ENSGALG00000012875 | 68,4672034 | 1,389711553 | 0,3440597  | 4,03915817 | 5,36E-05 | 0,0004376  | WEE2    |
| ENSGALG00000023689 | 74,9775085 | 1,388126911 | 0,34057145 | 4,07587575 | 4,58E-05 | 0,0003808  | ASS1    |
| ENSGALG00000026536 | 52,5121501 | 1,387507758 | 0,35369019 | 3,92294664 | 8,75E-05 | 0,00067057 | IP6K3   |
| ENSGALG00000014857 | 696,584571 | 1,387229623 | 0,18283909 | 7,58716103 | 3,27E-14 | 1,45E-12   | SELENOP |
| ENSGALG00000002319 | 151,603804 | 1,386034084 | 0,29385541 | 4,71672129 | 2,40E-06 | 2,84E-05   | TEKT2   |



|                     |            |             |            |            |            |            |          |
|---------------------|------------|-------------|------------|------------|------------|------------|----------|
| ENSGALG000000015776 | 28,4892202 | 1,382386109 | 0,34372541 | 4,02177453 | 5,78E-05   | 0,00046644 | GABRR2   |
| ENSGALG000000007636 | 33,4789778 | 1,381489214 | 0,3508105  | 3,93799273 | 8,22E-05   | 0,00063274 | PCK1     |
| ENSGALG000000007014 | 150,696913 | 1,378668928 | 0,28986414 | 4,75625908 | 1,97E-06   | 2,38E-05   |          |
| ENSGALG000000027973 | 59,7315947 | 1,378158223 | 0,3525539  | 3,90907098 | 9,27E-05   | 0,0007038  | CATHL1   |
| ENSGALG000000017099 | 99,5011022 | 1,377440865 | 0,3228202  | 4,26689803 | 1,98E-05   | 0,00018598 | RASL11A  |
| ENSGALG000000005493 | 91,8625446 | 1,375327372 | 0,3276333  | 4,19776428 | 2,70E-05   | 0,00024241 | ITGB1BP2 |
| ENSGALG000000006522 | 45,3533386 | 1,373172    | 0,35333674 | 3,88629841 | 0,00010178 | 0,00076226 | HCK      |
| ENSGALG000000012956 | 1426,50489 | 1,372804533 | 0,18631922 | 7,36802439 | 1,73E-13   | 6,93E-12   | TMTC1    |
| ENSGALG000000002105 | 44,5411838 | 1,371897103 | 0,35367265 | 3,8790025  | 0,00010489 | 0,00078376 | FOXI1    |
| ENSGALG000000016584 | 157,587524 | 1,371284929 | 0,29956385 | 4,57760477 | 4,70E-06   | 5,25E-05   | EGFL6    |
| ENSGALG000000000730 | 181,141324 | 1,369179792 | 0,28016862 | 4,88698482 | 1,02E-06   | 1,33E-05   |          |
| ENSGALG000000009151 | 104,263114 | 1,368816021 | 0,32143562 | 4,25844529 | 2,06E-05   | 0,00019223 |          |
| ENSGALG000000027420 | 141,879195 | 1,367365407 | 0,29420706 | 4,64762942 | 3,36E-06   | 3,86E-05   | POPDC3   |
| ENSGALG000000012971 | 180,161283 | 1,365874431 | 0,27502418 | 4,96637936 | 6,82E-07   | 9,15E-06   | CCDC170  |
| ENSGALG000000005852 | 42,716737  | 1,364112477 | 0,35370786 | 3,85660773 | 0,00011497 | 0,00084385 | SRMS     |
| ENSGALG000000020458 | 27,1299508 | 1,361629377 | 0,33978429 | 4,00733472 | 6,14E-05   | 0,00049065 |          |
| ENSGALG000000013221 | 46,5848114 | 1,36089575  | 0,35262592 | 3,85931853 | 0,0001137  | 0,00083635 | ARHGEF33 |
| ENSGALG000000016155 | 67,5195979 | 1,359832396 | 0,3425225  | 3,97005278 | 7,19E-05   | 0,00056355 |          |
| ENSGALG000000004840 | 833,065062 | 1,358453061 | 0,16895662 | 8,04024766 | 8,97E-16   | 4,78E-14   | RPH3A    |
| ENSGALG000000014913 | 89,5865526 | 1,358196979 | 0,33321545 | 4,07603243 | 4,58E-05   | 0,00038078 | ROS1     |
| ENSGALG000000028822 | 179,379351 | 1,357789969 | 0,27926636 | 4,86198902 | 1,16E-06   | 1,50E-05   | RNF152   |
| ENSGALG000000001932 | 150,41219  | 1,357009459 | 0,31045596 | 4,37102081 | 1,24E-05   | 0,00012454 | SRRM3    |
| ENSGALG000000006104 | 74,2255943 | 1,356707559 | 0,33688447 | 4,02721902 | 5,64E-05   | 0,00045713 | ADAMTSL3 |
| ENSGALG000000013914 | 741,463509 | 1,355434386 | 0,22319941 | 6,0727508  | 1,26E-09   | 2,95E-08   |          |
| ENSGALG000000001863 | 95,5730164 | 1,354146203 | 0,34957981 | 3,87363962 | 0,00010722 | 0,00079659 |          |
| ENSGALG000000024064 | 33,3700028 | 1,353791502 | 0,35292071 | 3,83596505 | 0,00012507 | 0,00090819 |          |
| ENSGALG000000017036 | 3151,42236 | 1,353726483 | 0,14349833 | 9,43374367 | 3,96E-21   | 3,41E-19   | LHFP     |
| ENSGALG000000016342 | 64,6889555 | 1,353678127 | 0,34807358 | 3,88905739 | 0,00010063 | 0,00075407 | MYOM2    |
| ENSGALG000000028162 | 25,784822  | 1,353451729 | 0,34077076 | 3,97173668 | 7,14E-05   | 0,00056055 |          |
| ENSGALG000000025857 | 83,4628776 | 1,352908608 | 0,3353198  | 4,03468155 | 5,47E-05   | 0,0004451  |          |
| ENSGALG000000005898 | 30,8597554 | 1,351366295 | 0,34832633 | 3,87959844 | 0,00010463 | 0,00078228 |          |
| ENSGALG000000026817 | 190,25856  | 1,350039834 | 0,30726986 | 4,39366176 | 1,11E-05   | 0,00011375 |          |
| ENSGALG000000011259 | 318,18554  | 1,346953088 | 0,23787295 | 5,66248952 | 1,49E-08   | 2,86E-07   | RPE65    |
| ENSGALG000000015186 | 1129,15289 | 1,345677898 | 0,16699384 | 8,05824872 | 7,74E-16   | 4,20E-14   |          |
| ENSGALG000000027568 | 132,010856 | 1,344832291 | 0,31080687 | 4,32690662 | 1,51E-05   | 0,00014748 |          |
| ENSGALG000000003671 | 47,5471462 | 1,341551712 | 0,35388746 | 3,79089929 | 0,0001501  | 0,00106718 |          |
| ENSGALG000000007106 | 977,161228 | 1,340640592 | 0,20719828 | 6,47032681 | 9,78E-11   | 2,66E-09   |          |
| ENSGALG000000002466 | 67,363583  | 1,337320513 | 0,34594234 | 3,86573239 | 0,00011076 | 0,00081776 | SLC2A5   |
| ENSGALG000000008283 | 62,9561587 | 1,336619904 | 0,34809582 | 3,83980453 | 0,00012313 | 0,00089506 |          |
| ENSGALG000000009058 | 854,57904  | 1,336327117 | 0,17615198 | 7,58621684 | 3,29E-14   | 1,46E-12   |          |
| ENSGALG000000014523 | 712,216802 | 1,335395904 | 0,18088858 | 7,38242249 | 1,55E-13   | 6,30E-12   |          |
| ENSGALG000000027624 | 90,7091995 | 1,332865286 | 0,32442701 | 4,10836716 | 3,98E-05   | 0,00033971 |          |
| ENSGALG000000020380 | 160,77545  | 1,332253662 | 0,29757918 | 4,47697203 | 7,57E-06   | 8,01E-05   |          |
| ENSGALG000000014117 | 36,1408998 | 1,330198207 | 0,35376021 | 3,76016911 | 0,0001698  | 0,00119227 |          |
| ENSGALG000000005330 | 2519,77115 | 1,328511787 | 0,13424164 | 9,89642129 | 4,31E-23   | 4,45E-21   | SNCAIP   |
| ENSGALG000000013481 | 89,3340529 | 1,327640637 | 0,33153417 | 4,00453641 | 6,21E-05   | 0,00049533 | IKZF3    |
| ENSGALG000000008434 | 453,347477 | 1,327566577 | 0,22347729 | 5,94049892 | 2,84E-09   | 6,30E-08   | SORCS3   |
| ENSGALG000000006134 | 56,0911679 | 1,326807835 | 0,34869604 | 3,80505559 | 0,00014177 | 0,00101484 |          |
| ENSGALG000000004903 | 45,997304  | 1,326402261 | 0,35371776 | 3,74988883 | 0,00017691 | 0,00123332 | CHST8    |
| ENSGALG000000015309 | 102,618363 | 1,321942011 | 0,33018568 | 4,00363218 | 6,24E-05   | 0,00049694 | SCML4    |
| ENSGALG000000016551 | 5221,05508 | 1,321564075 | 0,11774551 | 11,2239022 | 3,11E-29   | 5,11E-27   | AP1S2    |
| ENSGALG000000013302 | 789,25879  | 1,321288665 | 0,17573754 | 7,51853389 | 5,54E-14   | 2,35E-12   |          |
| ENSGALG000000009315 | 90,4745544 | 1,318764229 | 0,33354287 | 3,9538073  | 7,69E-05   | 0,00059603 | PAPLN    |
| ENSGALG000000027575 | 153,600714 | 1,316495304 | 0,2966273  | 4,43821352 | 9,07E-06   | 9,46E-05   |          |
| ENSGALG000000003050 | 83,7827729 | 1,314582894 | 0,33514644 | 3,92241347 | 8,77E-05   | 0,00067168 |          |
| ENSGALG000000002792 | 26,9329424 | 1,31306542  | 0,34508002 | 3,80510415 | 0,00014174 | 0,00101484 | SPDEF    |
| ENSGALG000000016368 | 37,7471182 | 1,308737431 | 0,35393883 | 3,69763729 | 0,00021762 | 0,00147112 |          |
| ENSGALG000000002389 | 532,146018 | 1,308458099 | 0,19760492 | 6,62158668 | 3,55E-11   | 1,03E-09   | ITGB4    |
| ENSGALG000000000164 | 213,826705 | 1,307977843 | 0,27864581 | 4,69405176 | 2,68E-06   | 3,15E-05   | MYBPH    |
| ENSGALG000000007732 | 613,17499  | 1,306274335 | 0,18526209 | 7,0509534  | 1,78E-12   | 6,32E-11   | RTN4R    |
| ENSGALG000000013838 | 384,542651 | 1,305966304 | 0,21582461 | 6,05105365 | 1,44E-09   | 3,34E-08   |          |
| ENSGALG000000003316 | 80,9265708 | 1,303670454 | 0,33354405 | 3,90854055 | 9,29E-05   | 0,0007043  |          |

|                     |            |             |            |            |            |            |            |
|---------------------|------------|-------------|------------|------------|------------|------------|------------|
| ENSGALG00000005802  | 409,595368 | 1,302158184 | 0,2262217  | 5,75611525 | 8,61E-09   | 1,72E-07   | FLT4       |
| ENSGALG000000016109 | 151,672095 | 1,299400996 | 0,28890898 | 4,49761372 | 6,87E-06   | 7,31E-05   |            |
| ENSGALG000000009700 | 477,109619 | 1,299326338 | 0,23266824 | 5,58445936 | 2,34E-08   | 4,28E-07   | PDK4       |
| ENSGALG000000006045 | 136,045181 | 1,297721233 | 0,30150221 | 4,30418474 | 1,68E-05   | 0,0001609  | SH3GL3     |
| ENSGALG000000006165 | 67,1698457 | 1,296804529 | 0,34433853 | 3,76607445 | 0,00016583 | 0,00116563 | WDFY4      |
| ENSGALG000000002234 | 407,001304 | 1,296274176 | 0,21729503 | 5,96550322 | 2,44E-09   | 5,48E-08   | UNC13D     |
| ENSGALG000000002051 | 21,0390889 | 1,294841211 | 0,33239734 | 3,89546205 | 9,80E-05   | 0,00073766 |            |
| ENSGALG000000008022 | 294,029309 | 1,293915137 | 0,23960701 | 5,40015561 | 6,66E-08   | 1,11E-06   |            |
| ENSGALG000000000775 | 136,777503 | 1,291374316 | 0,31998815 | 4,03569419 | 5,44E-05   | 0,00044358 | CTSS       |
| ENSGALG000000010540 | 264,704566 | 1,289706596 | 0,24325268 | 5,30192147 | 1,15E-07   | 1,81E-06   | TTC39A     |
| ENSGALG000000005790 | 146,077421 | 1,289660896 | 0,31496039 | 4,09467652 | 4,23E-05   | 0,00035587 |            |
| ENSGALG000000004859 | 354,90162  | 1,288425333 | 0,24778178 | 5,19983886 | 1,99E-07   | 3,02E-06   | ZNFX1      |
| ENSGALG000000003118 | 754,378386 | 1,286216079 | 0,18775875 | 6,85036558 | 7,37E-12   | 2,38E-10   | ADGRA2     |
| ENSGALG000000006779 | 194,184542 | 1,285794374 | 0,29046865 | 4,42662009 | 9,57E-06   | 9,92E-05   | PDZD3      |
| ENSGALG000000012362 | 940,671677 | 1,285048698 | 0,17252552 | 7,44845563 | 9,44E-14   | 3,88E-12   | THSD7B     |
| ENSGALG000000004044 | 637,181076 | 1,285008651 | 0,19785383 | 6,49473719 | 8,32E-11   | 2,30E-09   | CSRP3      |
| ENSGALG000000003580 | 1991,2953  | 1,284312011 | 0,19422271 | 6,61257377 | 3,78E-11   | 1,09E-09   | MMP2       |
| ENSGALG000000002855 | 1183,64483 | 1,278753967 | 0,16211473 | 7,88795656 | 3,07E-15   | 1,50E-13   | SARDH      |
| ENSGALG000000016564 | 80,407544  | 1,275019755 | 0,34133276 | 3,73541576 | 0,00018741 | 0,00129256 | PTK2B      |
| ENSGALG000000001028 | 434,619355 | 1,272121671 | 0,22824463 | 5,5735011  | 2,50E-08   | 4,54E-07   | RNF43      |
| ENSGALG000000007078 | 141,279073 | 1,270778013 | 0,30664146 | 4,14418193 | 3,41E-05   | 0,00029631 |            |
| ENSGALG000000009689 | 798,333776 | 1,269454305 | 0,17898437 | 7,09254266 | 1,32E-12   | 4,74E-11   |            |
| ENSGALG000000012740 | 435,216388 | 1,269186578 | 0,21598232 | 5,8763447  | 4,19E-09   | 8,99E-08   |            |
| ENSGALG000000000909 | 237,543246 | 1,268775969 | 0,26254608 | 4,83258398 | 1,35E-06   | 1,70E-05   | GFAP       |
| ENSGALG000000016967 | 712,9034   | 1,267335006 | 0,21530236 | 5,88630325 | 3,95E-09   | 8,55E-08   | ENOX1      |
| ENSGALG000000019797 | 403,10583  | 1,266041829 | 0,28583293 | 4,42930704 | 9,45E-06   | 9,81E-05   |            |
| ENSGALG000000007562 | 30,6870844 | 1,263491411 | 0,34960809 | 3,61402221 | 0,00030148 | 0,00194997 | FGF4       |
| ENSGALG000000008953 | 507,742329 | 1,263384491 | 0,20357748 | 6,20591478 | 5,44E-10   | 1,33E-08   | AASS       |
| ENSGALG000000001795 | 978,865317 | 1,261084777 | 0,18732211 | 6,73217257 | 1,67E-11   | 5,13E-10   |            |
| ENSGALG000000012978 | 566,09757  | 1,261073108 | 0,1899643  | 6,63847421 | 3,17E-11   | 9,30E-10   | CDYL2      |
| ENSGALG000000006725 | 183,577155 | 1,259943343 | 0,32489293 | 3,87802635 | 0,00010531 | 0,00078648 | ACAN       |
| ENSGALG000000014398 | 578,994538 | 1,259804122 | 0,2168754  | 5,80888439 | 6,29E-09   | 1,29E-07   |            |
| ENSGALG000000015598 | 190,820863 | 1,259472248 | 0,27786596 | 4,53266109 | 5,82E-06   | 6,30E-05   | RASGRF2    |
| ENSGALG000000002647 | 518,746939 | 1,258418808 | 0,24512541 | 5,13377553 | 2,84E-07   | 4,13E-06   | PLS1       |
| ENSGALG000000003490 | 147,804607 | 1,25835771  | 0,29722539 | 4,23368174 | 2,30E-05   | 0,0002112  |            |
| ENSGALG000000005458 | 78,5157022 | 1,258264066 | 0,3397845  | 3,70312374 | 0,00021296 | 0,00144324 | RPL3L      |
| ENSGALG000000005843 | 363,336884 | 1,25767053  | 0,2724846  | 4,61556557 | 3,92E-06   | 4,43E-05   | EEF1A2     |
| ENSGALG000000006809 | 89,4927086 | 1,25736391  | 0,32504634 | 3,86826053 | 0,00010961 | 0,00081065 | POU2AF1    |
| ENSGALG000000014014 | 690,531459 | 1,255177749 | 0,17796048 | 7,05312653 | 1,75E-12   | 6,24E-11   |            |
| ENSGALG000000001348 | 34,354329  | 1,253857774 | 0,350669   | 3,57561625 | 0,0003494  | 0,00221571 | TEKT3      |
| ENSGALG000000021855 | 271,814276 | 1,251787198 | 0,25254197 | 4,9567492  | 7,17E-07   | 9,57E-06   | CCDC39     |
| ENSGALG000000007193 | 236,114906 | 1,251769992 | 0,27435374 | 4,56261315 | 5,05E-06   | 5,59E-05   |            |
| ENSGALG000000018557 | 36,5653316 | 1,251460959 | 0,35373058 | 3,53789302 | 0,00040333 | 0,00250291 | SOD3       |
| ENSGALG000000025896 | 117,288757 | 1,251281202 | 0,32116119 | 3,89611589 | 9,77E-05   | 0,00073608 | PLPPR4     |
| ENSGALG000000012547 | 219,756071 | 1,25117298  | 0,29086976 | 4,30148871 | 1,70E-05   | 0,00016265 |            |
| ENSGALG000000013356 | 85,2230662 | 1,250931573 | 0,33961603 | 3,68337025 | 0,00023017 | 0,00154304 | IKBKE      |
| ENSGALG000000003404 | 2332,06775 | 1,24748878  | 0,13904188 | 8,97203598 | 2,91E-19   | 2,21E-17   |            |
| ENSGALG000000001206 | 49,0370075 | 1,247009104 | 0,35307655 | 3,53183782 | 0,00041268 | 0,00255627 |            |
| ENSGALG000000028496 | 22,1201797 | 1,24376929  | 0,33591389 | 3,70264323 | 0,00021336 | 0,00144525 |            |
| ENSGALG000000007065 | 27,8385164 | 1,239888336 | 0,34784058 | 3,5645304  | 0,00036451 | 0,00229546 | GJD4       |
| ENSGALG000000015345 | 537,385222 | 1,237723953 | 0,20004279 | 6,18729599 | 6,12E-10   | 1,49E-08   |            |
| ENSGALG000000028448 | 68,098086  | 1,236909029 | 0,34651471 | 3,5695715  | 0,00035757 | 0,00225696 | SH2D1B     |
| ENSGALG000000001564 | 906,154794 | 1,234344815 | 0,19698595 | 6,26615653 | 3,70E-10   | 9,23E-09   |            |
| ENSGALG000000023036 | 562,73194  | 1,234170444 | 0,20582667 | 5,99616393 | 2,02E-09   | 4,57E-08   | FRMPD1     |
| ENSGALG000000010927 | 22,2125847 | 1,233723332 | 0,33533284 | 3,67910081 | 0,00023406 | 0,00156441 |            |
| ENSGALG000000028681 | 168,618009 | 1,232657979 | 0,29055151 | 4,2424766  | 2,21E-05   | 0,00020433 |            |
| ENSGALG000000015573 | 43,775019  | 1,232214926 | 0,3535094  | 3,48566378 | 0,00049092 | 0,00295484 | FHL5       |
| ENSGALG000000005298 | 800,818564 | 1,231219861 | 0,17189685 | 7,16255038 | 7,92E-13   | 2,92E-11   | ST6GALNAC6 |
| ENSGALG000000016112 | 539,87209  | 1,228482119 | 0,20939423 | 5,86683837 | 4,44E-09   | 9,46E-08   |            |
| ENSGALG000000000107 | 237,729231 | 1,227291307 | 0,27709903 | 4,42907111 | 9,46E-06   | 9,81E-05   | TRIM7      |
| ENSGALG000000002086 | 83,650156  | 1,225708617 | 0,33362046 | 3,67396119 | 0,00023882 | 0,00159076 | RASL10B    |
| ENSGALG000000002667 | 699,199625 | 1,225466735 | 0,17683961 | 6,92982057 | 4,21E-12   | 1,40E-10   | OLFML2B    |



|                    |            |             |            |            |            |            |         |
|--------------------|------------|-------------|------------|------------|------------|------------|---------|
| ENSGALG00000013431 | 35,4490725 | 1,223926576 | 0,35351054 | 3,46220673 | 0,00053577 | 0,00317564 |         |
| ENSGALG00000028031 | 210,360934 | 1,22342747  | 0,2837755  | 4,31125118 | 1,62E-05   | 0,00015642 | C1QL1   |
| ENSGALG00000012019 | 150,440096 | 1,222353012 | 0,29815258 | 4,09975655 | 4,14E-05   | 0,00035053 |         |
| ENSGALG00000000048 | 677,127073 | 1,221920851 | 0,19907606 | 6,13795972 | 8,36E-10   | 2,00E-08   |         |
| ENSGALG00000028946 | 391,056645 | 1,217039733 | 0,25108871 | 4,84705086 | 1,25E-06   | 1,59E-05   |         |
| ENSGALG00000014407 | 118,55781  | 1,216198172 | 0,31990769 | 3,80171597 | 0,0001437  | 0,00102593 |         |
| ENSGALG00000012658 | 2563,96357 | 1,214376265 | 0,15238934 | 7,96890584 | 1,60E-15   | 8,19E-14   | TCP11L2 |
| ENSGALG00000028402 | 33,811586  | 1,211737057 | 0,34956854 | 3,46637901 | 0,00052752 | 0,00313769 |         |
| ENSGALG00000003345 | 1065,51677 | 1,211546204 | 0,16093702 | 7,52807643 | 5,15E-14   | 2,19E-12   |         |
| ENSGALG00000005083 | 47,8682724 | 1,210240985 | 0,35126406 | 3,44538807 | 0,00057024 | 0,00334551 | SLC5A10 |
| ENSGALG00000003803 | 110,857566 | 1,208011558 | 0,33977968 | 3,55527901 | 0,00037758 | 0,0023603  | DAB2    |
| ENSGALG00000026578 | 55,333978  | 1,20748664  | 0,35388721 | 3,41206638 | 0,00064472 | 0,00370533 |         |
| ENSGALG00000014126 | 18,9923327 | 1,207239433 | 0,3279747  | 3,6808919  | 0,00023242 | 0,00155583 |         |
| ENSGALG00000015764 | 5967,75227 | 1,20416113  | 0,19086925 | 6,30882741 | 2,81E-10   | 7,13E-09   |         |
| ENSGALG00000015528 | 170,233046 | 1,204136401 | 0,30064358 | 4,00519575 | 6,20E-05   | 0,00049428 | JAKMIP1 |
| ENSGALG00000002355 | 234,006388 | 1,203134529 | 0,25489167 | 4,72017987 | 2,36E-06   | 2,80E-05   |         |
| ENSGALG00000004641 | 146,280836 | 1,20257315  | 0,29654538 | 4,05527534 | 5,01E-05   | 0,0004122  |         |
| ENSGALG00000026903 | 111,361959 | 1,200671289 | 0,32831415 | 3,65708057 | 0,0002551  | 0,00168686 | CALB2   |
| ENSGALG00000004745 | 1802,35745 | 1,199713581 | 0,14187699 | 8,45601213 | 2,77E-17   | 1,74E-15   | NATD1   |
| ENSGALG00000013890 | 33,5607486 | 1,1996045   | 0,35201412 | 3,40783067 | 0,00065482 | 0,00374908 |         |
| ENSGALG00000019280 | 990,724576 | 1,199070585 | 0,17339981 | 6,91506298 | 4,68E-12   | 1,54E-10   |         |
| ENSGALG00000004066 | 55,6194601 | 1,199060923 | 0,35390165 | 3,38811906 | 0,00070374 | 0,00399391 | HTR6    |
| ENSGALG00000002082 | 57,1027996 | 1,198569946 | 0,34848133 | 3,43940933 | 0,00058299 | 0,00340658 | AMPD1   |
| ENSGALG00000013090 | 44,7148094 | 1,197838739 | 0,35381435 | 3,38550073 | 0,00071049 | 0,00402652 | LOXL4   |
| ENSGALG00000014696 | 222,596022 | 1,197793931 | 0,25975439 | 4,61125584 | 4,00E-06   | 4,51E-05   |         |
| ENSGALG00000006922 | 19,3844584 | 1,194740346 | 0,3271281  | 3,65220948 | 0,00025999 | 0,0017142  |         |
| ENSGALG00000011489 | 4656,68128 | 1,193784841 | 0,12166568 | 9,8120096  | 1,00E-22   | 9,93E-21   |         |
| ENSGALG00000016590 | 18,8906226 | 1,192009768 | 0,32708105 | 3,64438646 | 0,00026803 | 0,00175697 | TLR7    |
| ENSGALG00000002407 | 144,980361 | 1,191296249 | 0,30414176 | 3,9169112  | 8,97E-05   | 0,00068373 | HYDIN   |
| ENSGALG00000012890 | 273,965985 | 1,191168201 | 0,26407391 | 4,51073784 | 6,46E-06   | 6,90E-05   | DGKI    |
| ENSGALG00000027218 | 239,44089  | 1,190798556 | 0,27577811 | 4,317959   | 1,57E-05   | 0,00015239 |         |
| ENSGALG00000017040 | 33,0805894 | 1,190245244 | 0,3523261  | 3,37824885 | 0,00072949 | 0,00411775 |         |
| ENSGALG00000008362 | 175,023576 | 1,190011885 | 0,27541961 | 4,32072321 | 1,56E-05   | 0,00015103 | SSTR4   |
| ENSGALG00000004521 | 401,353263 | 1,187877806 | 0,21973208 | 5,40602807 | 6,44E-08   | 1,08E-06   | GPX3    |
| ENSGALG00000006074 | 272,240776 | 1,186152058 | 0,28359005 | 4,18262934 | 2,88E-05   | 0,00025631 | SOX6    |
| ENSGALG00000003842 | 39,7811882 | 1,185854219 | 0,35383776 | 3,35140662 | 0,00080402 | 0,00446624 | GHRH    |
| ENSGALG00000021882 | 58,6974367 | 1,185518376 | 0,34682245 | 3,41822852 | 0,0006303  | 0,00363471 |         |
| ENSGALG00000002744 | 252,461162 | 1,184999187 | 0,25185371 | 4,70510904 | 2,54E-06   | 3,00E-05   | PCDH15  |
| ENSGALG00000006768 | 37,969199  | 1,18499895  | 0,35365822 | 3,35068965 | 0,00080611 | 0,00447275 |         |
| ENSGALG00000014812 | 711,71818  | 1,183271769 | 0,18701629 | 6,32710549 | 2,50E-10   | 6,39E-09   | SIDT1   |
| ENSGALG00000017331 | 630,733948 | 1,182854332 | 0,18865205 | 6,27003173 | 3,61E-10   | 9,05E-09   |         |
| ENSGALG00000005547 | 144,897217 | 1,180323703 | 0,29897868 | 3,94785238 | 7,89E-05   | 0,00060932 | PIK3AP1 |
| ENSGALG00000017291 | 662,461807 | 1,180080414 | 0,20904403 | 5,64512838 | 1,65E-08   | 3,14E-07   | FAR2    |
| ENSGALG00000006308 | 28,0784724 | 1,179461013 | 0,33709473 | 3,4989008  | 0,00046718 | 0,00283376 |         |
| ENSGALG00000013112 | 320,804038 | 1,179282262 | 0,23305967 | 5,06000147 | 4,19E-07   | 5,90E-06   | RERGL   |
| ENSGALG00000007333 | 325,518561 | 1,178440858 | 0,25844246 | 4,55978035 | 5,12E-06   | 5,65E-05   | UBAP1L  |
| ENSGALG00000001021 | 191,271341 | 1,17756894  | 0,28381375 | 4,14909056 | 3,34E-05   | 0,00029114 | MYOCD   |
| ENSGALG00000003821 | 322,044025 | 1,177115475 | 0,23475754 | 5,01417543 | 5,33E-07   | 7,38E-06   | RAMP1   |
| ENSGALG00000003164 | 243,863169 | 1,17697714  | 0,25907141 | 4,54306075 | 5,54E-06   | 6,04E-05   |         |
| ENSGALG00000016651 | 946,900962 | 1,174964335 | 0,18486316 | 6,35585995 | 2,07E-10   | 5,41E-09   |         |
| ENSGALG00000002435 | 70,1914893 | 1,174947125 | 0,34690999 | 3,38689333 | 0,00070689 | 0,00400845 |         |
| ENSGALG00000001331 | 1782,64917 | 1,174179888 | 0,1437468  | 8,16839003 | 3,13E-16   | 1,75E-14   | ST14    |
| ENSGALG00000009114 | 216,592643 | 1,170782693 | 0,26080261 | 4,48915246 | 7,15E-06   | 7,60E-05   |         |
| ENSGALG00000028580 | 59,1862765 | 1,170297276 | 0,34946527 | 3,34882286 | 0,00081156 | 0,00449343 |         |
| ENSGALG00000006099 | 3185,42607 | 1,169037408 | 0,1372144  | 8,51978685 | 1,60E-17   | 1,03E-15   | ZFPM1   |
| ENSGALG00000014261 | 23192,4244 | 1,166708788 | 0,14807674 | 7,87908222 | 3,30E-15   | 1,59E-13   |         |
| ENSGALG00000006627 | 44,7235286 | 1,164076921 | 0,35292296 | 3,29838819 | 0,00097242 | 0,00521033 | UPB1    |
| ENSGALG00000012668 | 622,845457 | 1,1628752   | 0,24480349 | 4,75023949 | 2,03E-06   | 2,44E-05   |         |
| ENSGALG00000011446 | 368,843846 | 1,161895934 | 0,22151576 | 5,24520663 | 1,56E-07   | 2,42E-06   | TNFAIP2 |
| ENSGALG00000005630 | 38,0970872 | 1,161740711 | 0,34283622 | 3,38861721 | 0,00070246 | 0,00398832 | CRYBB1  |
| ENSGALG00000023879 | 439,210587 | 1,160823609 | 0,21167651 | 5,48395108 | 4,16E-08   | 7,24E-07   |         |
| ENSGALG00000007596 | 99,2163667 | 1,160341621 | 0,32378836 | 3,58364221 | 0,00033884 | 0,00216077 |         |

|                    |            |             |            |            |            |            |         |
|--------------------|------------|-------------|------------|------------|------------|------------|---------|
| ENSGALG00000005721 | 236,127639 | 1,159323873 | 0,25145197 | 4,61051812 | 4,02E-06   | 4,52E-05   | DGKG    |
| ENSGALG00000013911 | 546,725872 | 1,159209839 | 0,2024827  | 5,72498212 | 1,03E-08   | 2,03E-07   |         |
| ENSGALG00000011418 | 18,2422739 | 1,158885244 | 0,32516535 | 3,56398753 | 0,00036526 | 0,00229703 | CCR6    |
| ENSGALG00000028489 | 20,5369622 | 1,158414063 | 0,33177044 | 3,4916132  | 0,00048011 | 0,00290006 |         |
| ENSGALG00000001031 | 327,10314  | 1,156740289 | 0,24403187 | 4,74011969 | 2,14E-06   | 2,56E-05   | HSF5    |
| ENSGALG00000002016 | 953,709981 | 1,156233761 | 0,16494826 | 7,0096752  | 2,39E-12   | 8,30E-11   | PRKCD   |
| ENSGALG00000001095 | 18,2554746 | 1,156162616 | 0,32498658 | 3,55757036 | 0,0003743  | 0,00234627 |         |
| ENSGALG00000013980 | 288,264915 | 1,155390063 | 0,2983628  | 3,87243334 | 0,00010775 | 0,00079949 | SLC2A12 |
| ENSGALG00000026241 | 639,218946 | 1,154849081 | 0,23028217 | 5,01493056 | 5,31E-07   | 7,36E-06   | GRIN3B  |
| ENSGALG00000006208 | 100,690133 | 1,154488936 | 0,32195187 | 3,58590535 | 0,00033591 | 0,00214413 | OTOG    |
| ENSGALG00000009641 | 18352,4117 | 1,153845642 | 0,14589909 | 7,90851867 | 2,60E-15   | 1,28E-13   | COL1A2  |
| ENSGALG00000012288 | 52,9340022 | 1,152071153 | 0,35012037 | 3,29050023 | 0,00100009 | 0,00532927 |         |
| ENSGALG00000015932 | 523,705524 | 1,152042382 | 0,22404186 | 5,14208532 | 2,72E-07   | 3,98E-06   |         |
| ENSGALG00000003789 | 56,0437149 | 1,151405842 | 0,3500328  | 3,28942274 | 0,00100393 | 0,00534762 | FAM78A  |
| ENSGALG00000010365 | 313,078692 | 1,151056068 | 0,26208135 | 4,39198002 | 1,12E-05   | 0,0001143  |         |
| ENSGALG00000017691 | 74,6333149 | 1,149429932 | 0,34278483 | 3,35321124 | 0,0007988  | 0,00444266 |         |
| ENSGALG00000017374 | 478,615413 | 1,149174538 | 0,22225681 | 5,17048077 | 2,33E-07   | 3,48E-06   |         |
| ENSGALG00000028710 | 21,1011731 | 1,148265888 | 0,3321095  | 3,45749187 | 0,00054523 | 0,00322331 |         |
| ENSGALG00000012374 | 515,33143  | 1,147327656 | 0,19490406 | 5,88662778 | 3,94E-09   | 8,55E-08   | FRMD6   |
| ENSGALG00000016328 | 5259,3238  | 1,146952103 | 0,14040122 | 8,16910377 | 3,11E-16   | 1,75E-14   |         |
| ENSGALG00000025721 | 19,2431462 | 1,146921853 | 0,32414703 | 3,53827662 | 0,00040275 | 0,00250042 |         |
| ENSGALG00000012365 | 9658,53942 | 1,146353139 | 0,11013775 | 10,4083585 | 2,27E-25   | 2,97E-23   | PYGL    |
| ENSGALG00000005540 | 392,975435 | 1,145405784 | 0,21951203 | 5,21796369 | 1,81E-07   | 2,76E-06   | MICAL2  |
| ENSGALG00000028702 | 48,7217309 | 1,145044679 | 0,35222211 | 3,25091653 | 0,00115034 | 0,0060053  |         |
| ENSGALG00000022819 | 93,4187666 | 1,14482978  | 0,33650375 | 3,40213085 | 0,00066863 | 0,00382494 | PCP4    |
| ENSGALG00000001968 | 55,5701756 | 1,14394352  | 0,35227777 | 3,2472771  | 0,00116515 | 0,00606403 | SYT6    |
| ENSGALG00000012505 | 1173,09399 | 1,142096363 | 0,156235   | 7,31011862 | 2,67E-13   | 1,05E-11   | LRFN5   |
| ENSGALG00000015758 | 1198,98398 | 1,141437782 | 0,17077903 | 6,68371174 | 2,33E-11   | 6,96E-10   |         |
| ENSGALG00000003876 | 41,5449157 | 1,140755556 | 0,34478607 | 3,30858949 | 0,00093767 | 0,00507207 |         |
| ENSGALG00000009791 | 992,573884 | 1,140657464 | 0,21268775 | 5,3630614  | 8,18E-08   | 1,34E-06   | PROX1   |
| ENSGALG00000028130 | 1683,17579 | 1,140619832 | 0,15899173 | 7,17408269 | 7,28E-13   | 2,72E-11   |         |
| ENSGALG00000010673 | 22,7777978 | 1,139845847 | 0,34030069 | 3,34952553 | 0,0008095  | 0,00448387 | SLC1A7  |
| ENSGALG00000006436 | 58,7768458 | 1,138634151 | 0,35302664 | 3,22534908 | 0,00125819 | 0,00646426 |         |
| ENSGALG00000000620 | 143,16144  | 1,137872957 | 0,29367405 | 3,8746119  | 0,00010679 | 0,00079541 |         |
| ENSGALG00000013818 | 524,978654 | 1,136933045 | 0,21089775 | 5,39092064 | 7,01E-08   | 1,17E-06   | CITED2  |
| ENSGALG00000007236 | 26,5853166 | 1,136243459 | 0,34408993 | 3,30217003 | 0,0009594  | 0,00516702 |         |
| ENSGALG00000023643 | 36,5223482 | 1,136155947 | 0,35390776 | 3,2103166  | 0,00132589 | 0,00675092 |         |
| ENSGALG00000007129 | 549,585731 | 1,134513156 | 0,27598889 | 4,11072037 | 3,94E-05   | 0,00033711 |         |
| ENSGALG00000001442 | 382,78952  | 1,131898366 | 0,21564935 | 5,24879104 | 1,53E-07   | 2,37E-06   | OPCML   |
| ENSGALG00000000217 | 558,865853 | 1,131400306 | 0,21968434 | 5,15011819 | 2,60E-07   | 3,84E-06   | PPFIA4  |
| ENSGALG00000000911 | 18,8021132 | 1,131377385 | 0,32322345 | 3,50029482 | 0,00046474 | 0,00282099 | IL19    |
| ENSGALG00000003028 | 252,863378 | 1,131167716 | 0,25365391 | 4,45949245 | 8,22E-06   | 8,64E-05   |         |
| ENSGALG00000027626 | 26,2635541 | 1,129092221 | 0,34723307 | 3,251684   | 0,00114723 | 0,00599848 |         |
| ENSGALG00000008063 | 112,836606 | 1,129089778 | 0,31997995 | 3,52862665 | 0,00041772 | 0,00258161 | NOX5    |
| ENSGALG00000016592 | 75,5093263 | 1,127895523 | 0,34582316 | 3,26148062 | 0,00110832 | 0,00582167 | PRPS2   |
| ENSGALG00000021529 | 183,029289 | 1,127864143 | 0,27306603 | 4,13037145 | 3,62E-05   | 0,00031229 | GP1BB   |
| ENSGALG00000006503 | 1322,53017 | 1,127315674 | 0,17398315 | 6,47945327 | 9,21E-11   | 2,52E-09   | VDAC1   |
| ENSGALG00000026333 | 170,514796 | 1,126889713 | 0,28096298 | 4,01081206 | 6,05E-05   | 0,00048433 |         |
| ENSGALG00000015348 | 3709,65535 | 1,126202791 | 0,16010935 | 7,03395999 | 2,01E-12   | 7,08E-11   | ALCAM   |
| ENSGALG00000027872 | 562,415563 | 1,125834202 | 0,2065498  | 5,45066721 | 5,02E-08   | 8,57E-07   |         |
| ENSGALG00000007964 | 712,005282 | 1,125506336 | 0,19390731 | 5,80435241 | 6,46E-09   | 1,32E-07   | GATSL3  |
| ENSGALG00000008940 | 122,073119 | 1,125469701 | 0,30445466 | 3,69667421 | 0,00021844 | 0,00147524 | SPTBN5  |
| ENSGALG00000012252 | 31,0664734 | 1,124245419 | 0,34638552 | 3,24564781 | 0,00117184 | 0,00608953 |         |
| ENSGALG00000009237 | 283,646852 | 1,124183808 | 0,25265321 | 4,44951324 | 8,61E-06   | 9,03E-05   |         |
| ENSGALG00000008629 | 362,430604 | 1,122527446 | 0,28746439 | 3,90492695 | 9,43E-05   | 0,00071253 |         |
| ENSGALG00000004649 | 115,318908 | 1,122312882 | 0,33908753 | 3,30980286 | 0,00093362 | 0,00506019 | TRPV1   |
| ENSGALG00000016821 | 91,586414  | 1,121951764 | 0,32755694 | 3,42521141 | 0,00061432 | 0,00356825 |         |
| ENSGALG00000000994 | 36,3375502 | 1,120119947 | 0,35335281 | 3,1699761  | 0,00152451 | 0,00753677 |         |
| ENSGALG00000009943 | 1812,23536 | 1,119992507 | 0,14209817 | 7,8818219  | 3,23E-15   | 1,56E-13   | FAM117A |
| ENSGALG00000028795 | 3146,83309 | 1,118039364 | 0,16042604 | 6,96918862 | 3,19E-12   | 1,09E-10   |         |
| ENSGALG00000026758 | 74,5546131 | 1,11741437  | 0,33538362 | 3,33174999 | 0,00086302 | 0,0047277  |         |
| ENSGALG00000001204 | 1443,12547 | 1,117076992 | 0,14668872 | 7,61528921 | 2,63E-14   | 1,19E-12   | ENKD1   |

|                    |            |             |            |            |            |            |          |
|--------------------|------------|-------------|------------|------------|------------|------------|----------|
| ENSGALG00000012055 | 30,6319383 | 1,115864912 | 0,34954847 | 3,19230382 | 0,00141143 | 0,00709885 |          |
| ENSGALG00000015469 | 3626,20782 | 1,115704157 | 0,1321025  | 8,44574565 | 3,02E-17   | 1,89E-15   |          |
| ENSGALG00000009963 | 76,7800387 | 1,114244364 | 0,33758559 | 3,30062774 | 0,00096469 | 0,00518524 | LYZ      |
| ENSGALG00000011414 | 712,898703 | 1,112714675 | 0,17966211 | 6,19337424 | 5,89E-10   | 1,44E-08   | AMDHD1   |
| ENSGALG00000015454 | 87,0613625 | 1,111985108 | 0,33768276 | 3,29298749 | 0,00099129 | 0,00529478 |          |
| ENSGALG00000010233 | 149,38519  | 1,111330421 | 0,289789   | 3,83496413 | 0,00012558 | 0,00091141 | SYNDIG1L |
| ENSGALG00000024411 | 95,5715091 | 1,110994905 | 0,32259096 | 3,44397412 | 0,00057323 | 0,00335823 |          |
| ENSGALG00000003016 | 111,975898 | 1,109545556 | 0,31007137 | 3,57835536 | 0,00034576 | 0,00219771 | MASP2    |
| ENSGALG00000006792 | 447,856144 | 1,109047707 | 0,21887998 | 5,06692165 | 4,04E-07   | 5,71E-06   | VSTM2L   |
| ENSGALG00000009823 | 207,863068 | 1,108978484 | 0,26701827 | 4,15319326 | 3,28E-05   | 0,00028633 | PTPRE    |
| ENSGALG00000027501 | 1178,23042 | 1,108782799 | 0,15555529 | 7,12790156 | 1,02E-12   | 3,72E-11   | ANPEP    |
| ENSGALG00000004017 | 335,243952 | 1,108435951 | 0,22759443 | 4,87022448 | 1,11E-06   | 1,44E-05   | TOR1AIP2 |
| ENSGALG00000025912 | 62,6339712 | 1,108425226 | 0,34376932 | 3,22432853 | 0,00126268 | 0,00648    |          |
| ENSGALG00000000158 | 209,106145 | 1,107475494 | 0,2643096  | 4,19006906 | 2,79E-05   | 0,00024946 |          |
| ENSGALG00000002610 | 604,590631 | 1,105862871 | 0,18967796 | 5,83021282 | 5,54E-09   | 1,15E-07   |          |
| ENSGALG00000023621 | 702,550009 | 1,105773477 | 0,19719495 | 5,60751405 | 2,05E-08   | 3,82E-07   | SFXN3    |
| ENSGALG00000009574 | 24,9756977 | 1,105678443 | 0,34380548 | 3,21600002 | 0,00129991 | 0,00664829 |          |
| ENSGALG00000006000 | 170,909865 | 1,105166021 | 0,29241804 | 3,77940435 | 0,0001572  | 0,00111071 |          |
| ENSGALG00000001011 | 623,472513 | 1,104831537 | 0,2206424  | 5,00733998 | 5,52E-07   | 7,61E-06   |          |
| ENSGALG00000011473 | 347,60043  | 1,104703027 | 0,22754114 | 4,85495953 | 1,20E-06   | 1,54E-05   | RPS6KA2  |
| ENSGALG00000026834 | 233,708518 | 1,10373431  | 0,25983013 | 4,24790728 | 2,16E-05   | 0,00020012 |          |
| ENSGALG00000006003 | 58,9954831 | 1,10329195  | 0,3504724  | 3,14801378 | 0,00164384 | 0,00802229 |          |
| ENSGALG00000001281 | 270,657774 | 1,101845994 | 0,24895157 | 4,42594511 | 9,60E-06   | 9,94E-05   |          |
| ENSGALG00000006407 | 926,885262 | 1,100961832 | 0,17822617 | 6,17732963 | 6,52E-10   | 1,58E-08   |          |
| ENSGALG00000011003 | 180,050652 | 1,099169303 | 0,28561474 | 3,84843338 | 0,00011888 | 0,00086689 | SLC35F3  |
| ENSGALG00000000168 | 20,2372176 | 1,099055711 | 0,33636253 | 3,26747371 | 0,00108512 | 0,00571524 | ADORA1   |
| ENSGALG00000014798 | 1444,6552  | 1,098754437 | 0,18532469 | 5,92880749 | 3,05E-09   | 6,69E-08   | SERINC5  |
| ENSGALG00000015076 | 118,818737 | 1,094512369 | 0,30475359 | 3,59146666 | 0,00032882 | 0,00210678 |          |
| ENSGALG00000002579 | 438,862484 | 1,09231668  | 0,24079762 | 4,53624361 | 5,73E-06   | 6,21E-05   | RIMBP2   |
| ENSGALG00000027102 | 27,9313615 | 1,090659115 | 0,34855662 | 3,12907298 | 0,00175359 | 0,00846159 |          |
| ENSGALG00000007740 | 159,049731 | 1,089704597 | 0,29794304 | 3,6574259  | 0,00025476 | 0,00168541 |          |
| ENSGALG00000004972 | 200,694244 | 1,089536909 | 0,30285765 | 3,59752149 | 0,00032126 | 0,00206127 |          |
| ENSGALG00000004538 | 131,202356 | 1,088596778 | 0,30030855 | 3,62492773 | 0,00028904 | 0,00188202 | TNN      |
| ENSGALG00000005470 | 915,927743 | 1,087631823 | 0,1770332  | 6,14366031 | 8,06E-10   | 1,93E-08   | PLPPR5   |
| ENSGALG00000006189 | 81,0476646 | 1,08750661  | 0,33966232 | 3,20172876 | 0,00136606 | 0,00691664 | CRYGN    |
| ENSGALG00000001716 | 219,086022 | 1,084481493 | 0,27662697 | 3,92037508 | 8,84E-05   | 0,00067587 | C15orf59 |
| ENSGALG00000017106 | 609,784044 | 1,082115941 | 0,19278194 | 5,61316028 | 1,99E-08   | 3,72E-07   | ATP8A2   |
| ENSGALG00000014264 | 24,119483  | 1,081789708 | 0,34218632 | 3,16140549 | 0,0015701  | 0,00773684 | NSUN7    |
| ENSGALG00000001470 | 804,498578 | 1,081645785 | 0,18189855 | 5,94642334 | 2,74E-09   | 6,10E-08   | STOML1   |
| ENSGALG00000023636 | 80,78387   | 1,079731402 | 0,33574779 | 3,21590026 | 0,00130036 | 0,00664829 |          |
| ENSGALG00000021303 | 70,1790621 | 1,078464744 | 0,33870785 | 3,18405595 | 0,00145227 | 0,00725779 |          |
| ENSGALG00000011353 | 167,024074 | 1,077984355 | 0,29480885 | 3,65655358 | 0,00025563 | 0,00168869 |          |
| ENSGALG00000026651 | 469,211499 | 1,076820994 | 0,26273591 | 4,09849186 | 4,16E-05   | 0,00035167 | SCARA3   |
| ENSGALG00000005031 | 222,866745 | 1,076697936 | 0,27611031 | 3,89952093 | 9,64E-05   | 0,00072701 | DRP2     |
| ENSGALG00000005076 | 658,308514 | 1,075685444 | 0,20135322 | 5,34228092 | 9,18E-08   | 1,49E-06   |          |
| ENSGALG00000013180 | 23,7835918 | 1,075255786 | 0,33793034 | 3,18188592 | 0,00146319 | 0,0072892  | SLC6A18  |
| ENSGALG00000004043 | 1743,12209 | 1,074636101 | 0,18109836 | 5,93399142 | 2,96E-09   | 6,52E-08   |          |
| ENSGALG00000000420 | 275,786063 | 1,072751202 | 0,24334062 | 4,40843449 | 1,04E-05   | 0,00010699 |          |
| ENSGALG00000003640 | 1881,52679 | 1,071788322 | 0,14728433 | 7,2770018  | 3,41E-13   | 1,33E-11   |          |
| ENSGALG00000009355 | 164,050555 | 1,070935457 | 0,2815733  | 3,80339851 | 0,00014272 | 0,00102045 | CLDN11   |
| ENSGALG00000026748 | 19,4954498 | 1,069944148 | 0,32787916 | 3,26322706 | 0,00110151 | 0,00578815 |          |
| ENSGALG00000004406 | 128,12145  | 1,066534863 | 0,31159618 | 3,42281114 | 0,00061977 | 0,00358919 |          |
| ENSGALG00000006370 | 31,1681716 | 1,066397762 | 0,34558448 | 3,08578021 | 0,00203019 | 0,00956436 |          |
| ENSGALG00000012377 | 68,8818144 | 1,065846022 | 0,33849137 | 3,14881303 | 0,00163935 | 0,00801428 | HNMT     |
| ENSGALG00000010752 | 133,532542 | 1,063752645 | 0,31701468 | 3,35553118 | 0,00079213 | 0,00441384 | CDCP2    |
| ENSGALG00000021049 | 25,1605315 | 1,063749147 | 0,33499236 | 3,17544297 | 0,00149608 | 0,00741774 |          |
| ENSGALG00000006374 | 154,22163  | 1,06372742  | 0,34611406 | 3,07334361 | 0,00211675 | 0,00991383 | TBX6     |
| ENSGALG00000007780 | 1769,76781 | 1,063721106 | 0,16415536 | 6,47996553 | 9,17E-11   | 2,52E-09   | EIF4E3   |
| ENSGALG00000021542 | 348,907918 | 1,061917275 | 0,24470276 | 4,3396212  | 1,43E-05   | 0,00014102 | SNCB     |
| ENSGALG00000002055 | 5059,12603 | 1,061032342 | 0,12896244 | 8,22745271 | 1,91E-16   | 1,10E-14   | hairy1   |
| ENSGALG00000028742 | 318,003255 | 1,06018982  | 0,24476244 | 4,33150539 | 1,48E-05   | 0,0001453  |          |
| ENSGALG00000001040 | 379,37277  | 1,060173693 | 0,22651608 | 4,68034629 | 2,86E-06   | 3,34E-05   |          |

|                    |            |             |            |            |            |            |         |
|--------------------|------------|-------------|------------|------------|------------|------------|---------|
| ENSGALG00000008734 | 1277,14965 | 1,060092794 | 0,17848485 | 5,93939919 | 2,86E-09   | 6,33E-08   | PCSK2   |
| ENSGALG00000025771 | 418,454799 | 1,059868939 | 0,21305921 | 4,97452772 | 6,54E-07   | 8,82E-06   |         |
| ENSGALG00000017311 | 141,945952 | 1,059578058 | 0,29313349 | 3,61466049 | 0,00030074 | 0,00194647 |         |
| ENSGALG00000002554 | 211,299245 | 1,058725863 | 0,27265415 | 3,88303593 | 0,00010316 | 0,00077214 | TSPAN2  |
| ENSGALG00000011898 | 1941,78412 | 1,056447793 | 0,1400944  | 7,54097066 | 4,66E-14   | 2,00E-12   | FAM109B |
| ENSGALG00000012545 | 20,3956262 | 1,051934631 | 0,33312924 | 3,15773734 | 0,00158999 | 0,00780659 | CYTIP   |
| ENSGALG00000010497 | 795,792907 | 1,048579632 | 0,17878894 | 5,86490213 | 4,49E-09   | 9,56E-08   | SLC29A4 |
| ENSGALG00000000503 | 90,5216838 | 1,0483641   | 0,32883068 | 3,18815785 | 0,00143182 | 0,00718021 |         |
| ENSGALG00000007959 | 24,9928179 | 1,04699816  | 0,3339903  | 3,13481605 | 0,00171962 | 0,00832534 | SLC26A3 |
| ENSGALG00000012045 | 94,1610251 | 1,046487546 | 0,33468277 | 3,1268044  | 0,00176717 | 0,00850781 |         |
| ENSGALG00000009340 | 441,508564 | 1,044750001 | 0,25059513 | 4,16907546 | 3,06E-05   | 0,00027021 |         |
| ENSGALG00000007617 | 161,132474 | 1,044420437 | 0,30323964 | 3,44420813 | 0,00057273 | 0,00335677 |         |
| ENSGALG00000007837 | 153,44217  | 1,044277791 | 0,31727304 | 3,29141673 | 0,00099684 | 0,0053161  | KAZALD1 |
| ENSGALG00000016020 | 82,6868728 | 1,041815502 | 0,33102199 | 3,14726979 | 0,00164803 | 0,0080365  |         |
| ENSGALG00000016608 | 1071,03802 | 1,041630113 | 0,16148809 | 6,45019776 | 1,12E-10   | 3,01E-09   | ADCY3   |
| ENSGALG00000014258 | 1564,45283 | 1,040436704 | 0,17049678 | 6,10238319 | 1,04E-09   | 2,47E-08   | LIMCH1  |
| ENSGALG00000027096 | 1851,9247  | 1,040113834 | 0,13778609 | 7,54875793 | 4,39E-14   | 1,90E-12   | LGALSL  |
| ENSGALG00000024369 | 197,407512 | 1,038738473 | 0,26515652 | 3,91745396 | 8,95E-05   | 0,00068257 |         |
| ENSGALG00000028234 | 617,735502 | 1,03829388  | 0,19109872 | 5,43328543 | 5,53E-08   | 9,37E-07   |         |
| ENSGALG00000007219 | 1265,62807 | 1,038287687 | 0,15486967 | 6,70426727 | 2,02E-11   | 6,12E-10   |         |
| ENSGALG00000007253 | 1268,2995  | 1,036667095 | 0,15805846 | 6,55875735 | 5,43E-11   | 1,54E-09   | IL1RAP  |
| ENSGALG00000005460 | 763,147126 | 1,036332157 | 0,18413261 | 5,6281837  | 1,82E-08   | 3,43E-07   | SLCO4A1 |
| ENSGALG00000026714 | 2323,49209 | 1,035206481 | 0,15670753 | 6,60597808 | 3,95E-11   | 1,13E-09   |         |
| ENSGALG00000024122 | 36,985836  | 1,03453695  | 0,33443583 | 3,09337955 | 0,00197891 | 0,00935579 |         |
| ENSGALG00000023779 | 766,128835 | 1,033222085 | 0,19891303 | 5,19434077 | 2,05E-07   | 3,11E-06   |         |
| ENSGALG00000028318 | 1679,83733 | 1,033139386 | 0,18498818 | 5,584894   | 2,34E-08   | 4,28E-07   | CDKN1A  |
| ENSGALG00000005114 | 245,746736 | 1,032666035 | 0,25457852 | 4,05637544 | 4,98E-05   | 0,00041076 |         |
| ENSGALG00000028628 | 176,658931 | 1,032210406 | 0,27931003 | 3,6955723  | 0,00021939 | 0,00148092 |         |
| ENSGALG00000011875 | 520,49686  | 1,032103241 | 0,20932071 | 4,93072682 | 8,19E-07   | 1,08E-05   | TRPC3   |
| ENSGALG00000001304 | 107,91968  | 1,031984172 | 0,31646483 | 3,26097581 | 0,0011103  | 0,0058298  |         |
| ENSGALG00000004860 | 237,1229   | 1,03038994  | 0,25186264 | 4,09107893 | 4,29E-05   | 0,00035997 | RASD1   |
| ENSGALG00000010566 | 1230,63642 | 1,029946325 | 0,16433565 | 6,26733359 | 3,67E-10   | 9,18E-09   |         |
| ENSGALG00000012791 | 100,570938 | 1,028853172 | 0,32574707 | 3,15844184 | 0,00158615 | 0,00779056 | TBXAS1  |
| ENSGALG00000024024 | 333,882358 | 1,028182094 | 0,2283532  | 4,5025956  | 6,71E-06   | 7,16E-05   | TGFA    |
| ENSGALG00000009739 | 1255,18637 | 1,027863615 | 0,18332662 | 5,60673425 | 2,06E-08   | 3,83E-07   | AMIGO2  |
| ENSGALG00000010078 | 138,046016 | 1,027109659 | 0,2951454  | 3,48001248 | 0,00050139 | 0,00300724 | GLP1R   |
| ENSGALG00000003349 | 284,814958 | 1,025286613 | 0,23608456 | 4,34287875 | 1,41E-05   | 0,00013925 | PLEKHA2 |
| ENSGALG00000009722 | 2700,68769 | 1,024969081 | 0,12748481 | 8,03993117 | 8,99E-16   | 4,78E-14   | DYNC1I1 |
| ENSGALG00000013200 | 141,95986  | 1,024952745 | 0,30040339 | 3,4119214  | 0,00064507 | 0,00370573 | GABBR2  |
| ENSGALG00000029169 | 143,486281 | 1,024627176 | 0,29797907 | 3,43858777 | 0,00058476 | 0,00341401 |         |
| ENSGALG00000025906 | 86,1054184 | 1,019071961 | 0,32995746 | 3,08849502 | 0,00201173 | 0,00949054 |         |
| ENSGALG00000012564 | 122,738702 | 1,018929434 | 0,30201581 | 3,37376189 | 0,00074148 | 0,00416817 |         |
| ENSGALG00000009686 | 819,704721 | 1,017336386 | 0,20309235 | 5,00923036 | 5,46E-07   | 7,54E-06   |         |
| ENSGALG00000001698 | 101,577734 | 1,017252154 | 0,31962329 | 3,18265971 | 0,00145929 | 0,00727774 | GABRA1  |
| ENSGALG00000002991 | 1547,8463  | 1,016425478 | 0,15188757 | 6,69195943 | 2,20E-11   | 6,60E-10   |         |
| ENSGALG00000001191 | 726,030438 | 1,014738695 | 0,17607486 | 5,76310952 | 8,26E-09   | 1,66E-07   | MEOX1   |
| ENSGALG00000009066 | 83,1568975 | 1,013658719 | 0,32821816 | 3,08836875 | 0,00201259 | 0,00949129 |         |
| ENSGALG00000016223 | 759,19748  | 1,013131958 | 0,18257274 | 5,54919615 | 2,87E-08   | 5,19E-07   |         |
| ENSGALG00000010203 | 639,913614 | 1,012100046 | 0,1964193  | 5,15275255 | 2,57E-07   | 3,79E-06   |         |
| ENSGALG00000008874 | 19,4465425 | 1,010524458 | 0,32352202 | 3,1235106  | 0,00178707 | 0,00857934 | SLC13A1 |
| ENSGALG00000022718 | 221,713706 | 1,010197798 | 0,26186126 | 3,85775962 | 0,00011443 | 0,00084033 |         |
| ENSGALG00000014455 | 15,3755596 | 1,009369671 | 0,31516038 | 3,20271755 | 0,00136137 | 0,0068955  | LPAR5   |
| ENSGALG00000008080 | 251,329122 | 1,008867324 | 0,25119635 | 4,01624997 | 5,91E-05   | 0,00047553 | C1QTNF4 |
| ENSGALG00000001951 | 315,95633  | 1,007959576 | 0,24129054 | 4,17736875 | 2,95E-05   | 0,00026123 |         |
| ENSGALG00000027712 | 289,192222 | 1,006836187 | 0,24626896 | 4,08836006 | 4,34E-05   | 0,00036327 |         |
| ENSGALG00000028186 | 897,733771 | 1,005437673 | 0,18601887 | 5,40503063 | 6,48E-08   | 1,09E-06   | RERG    |
| ENSGALG00000003816 | 91,3783387 | 1,005135037 | 0,32711976 | 3,07268213 | 0,00212144 | 0,009926   | NT5C1A  |
| ENSGALG00000007713 | 153,549096 | 1,002069085 | 0,29743797 | 3,36900193 | 0,00075441 | 0,00423331 |         |
| ENSGALG00000016251 | 6835,37033 | 1,000647408 | 0,15469938 | 6,46833505 | 9,91E-11   | 2,69E-09   |         |
| ENSGALG00000023953 | 637,175356 | 0,998916427 | 0,18661623 | 5,35278435 | 8,66E-08   | 1,41E-06   |         |
| ENSGALG00000005887 | 163,632495 | 0,998359123 | 0,30751037 | 3,24658685 | 0,00116798 | 0,00607411 |         |
| ENSGALG00000012480 | 541,532617 | 0,99597856  | 0,2064035  | 4,82539577 | 1,40E-06   | 1,76E-05   |         |

|                    |            |             |            |            |            |            |          |
|--------------------|------------|-------------|------------|------------|------------|------------|----------|
| ENSGALG00000014681 | 398,451477 | 0,995892967 | 0,23114252 | 4,30856669 | 1,64E-05   | 0,0001581  | PCSK1    |
| ENSGALG00000017316 | 218,980953 | 0,995598244 | 0,30126263 | 3,30475185 | 0,00095061 | 0,0051298  | UCP3     |
| ENSGALG00000001453 | 365,617866 | 0,994068241 | 0,24549624 | 4,04921983 | 5,14E-05   | 0,00042072 |          |
| ENSGALG00000002437 | 722,53208  | 0,993124174 | 0,18855357 | 5,26706645 | 1,39E-07   | 2,17E-06   | FAM69B   |
| ENSGALG00000012613 | 121,972608 | 0,992227725 | 0,31630972 | 3,13688661 | 0,00170752 | 0,00827328 | FBP1     |
| ENSGALG00000028682 | 130,825911 | 0,990483134 | 0,3063312  | 3,23337336 | 0,00122338 | 0,00631397 | CBLN2    |
| ENSGALG00000013183 | 389,466708 | 0,988585254 | 0,21644464 | 4,56738155 | 4,94E-06   | 5,48E-05   | TERT     |
| ENSGALG00000009638 | 342,698465 | 0,988233263 | 0,2260661  | 4,3714351  | 1,23E-05   | 0,00012439 | ANO6     |
| ENSGALG00000016224 | 196,097983 | 0,988198095 | 0,27726141 | 3,56413865 | 0,00036505 | 0,00229676 | MAOA     |
| ENSGALG00000009052 | 3269,15476 | 0,987910707 | 0,16241285 | 6,08271266 | 1,18E-09   | 2,78E-08   | LBH      |
| ENSGALG00000026042 | 849,913797 | 0,987626868 | 0,23717847 | 4,16406621 | 3,13E-05   | 0,00027514 |          |
| ENSGALG00000012536 | 763,863052 | 0,987580114 | 0,21162614 | 4,66662634 | 3,06E-06   | 3,54E-05   | GALNT13  |
| ENSGALG00000016599 | 16,0014025 | 0,987073109 | 0,31315435 | 3,15203387 | 0,00162137 | 0,00793209 |          |
| ENSGALG00000009463 | 2838,70473 | 0,986691121 | 0,14031176 | 7,03213428 | 2,03E-12   | 7,16E-11   |          |
| ENSGALG00000005030 | 1142,72142 | 0,984706358 | 0,17789423 | 5,53534734 | 3,11E-08   | 5,55E-07   | DOCK10   |
| ENSGALG00000027429 | 108,061421 | 0,983232181 | 0,31233583 | 3,14799676 | 0,00164394 | 0,00802229 | HSD17B1  |
| ENSGALG00000023847 | 205,80734  | 0,981888346 | 0,26827405 | 3,66001979 | 0,0002522  | 0,00166925 |          |
| ENSGALG00000012552 | 632,633121 | 0,981819434 | 0,18202425 | 5,39389345 | 6,89E-08   | 1,15E-06   | TOM1     |
| ENSGALG00000027739 | 223,979623 | 0,981670308 | 0,28088257 | 3,49494923 | 0,00047415 | 0,00287042 |          |
| ENSGALG00000012715 | 380,224027 | 0,978917656 | 0,24539961 | 3,98907579 | 6,63E-05   | 0,00052445 | CAP2     |
| ENSGALG00000012709 | 399,326921 | 0,978132572 | 0,259146   | 3,77444597 | 0,00016036 | 0,0011301  | ATXN1    |
| ENSGALG00000028301 | 585,856129 | 0,976931086 | 0,20530374 | 4,75846719 | 1,95E-06   | 2,36E-05   |          |
| ENSGALG00000006882 | 2766,70659 | 0,976472658 | 0,13081296 | 7,46464785 | 8,35E-14   | 3,47E-12   | ST8SIA2  |
| ENSGALG00000024059 | 15,053333  | 0,976199065 | 0,31251247 | 3,12371231 | 0,00178585 | 0,00857649 |          |
| ENSGALG00000010797 | 412,002343 | 0,975073157 | 0,21003242 | 4,64248879 | 3,44E-06   | 3,95E-05   |          |
| ENSGALG00000000902 | 273,817902 | 0,974915117 | 0,24422686 | 3,99184233 | 6,56E-05   | 0,00051867 | KDF1     |
| ENSGALG00000004591 | 574,278704 | 0,974905454 | 0,19696934 | 4,949529   | 7,44E-07   | 9,89E-06   | SERPINC1 |
| ENSGALG00000018875 | 14,7404116 | 0,973272591 | 0,3123576  | 3,11589219 | 0,00183389 | 0,00876086 |          |
| ENSGALG00000003886 | 1023,87733 | 0,971801068 | 0,17739435 | 5,47819617 | 4,30E-08   | 7,44E-07   | SGCD     |
| ENSGALG00000005844 | 1501,38821 | 0,969445519 | 0,15286931 | 6,34166216 | 2,27E-10   | 5,87E-09   |          |
| ENSGALG00000016820 | 787,309833 | 0,968970008 | 0,17832491 | 5,43373323 | 5,52E-08   | 9,36E-07   | GAS6     |
| ENSGALG00000027287 | 736,986058 | 0,968636988 | 0,18931485 | 5,11653998 | 3,11E-07   | 4,50E-06   |          |
| ENSGALG00000003170 | 1633,73146 | 0,967045053 | 0,17416807 | 5,55236702 | 2,82E-08   | 5,10E-07   |          |
| ENSGALG00000026870 | 2578,97026 | 0,966911139 | 0,16329066 | 5,92141112 | 3,19E-09   | 6,99E-08   |          |
| ENSGALG00000027511 | 3914,70702 | 0,966828969 | 0,15258887 | 6,33616983 | 2,36E-10   | 6,06E-09   |          |
| ENSGALG00000001209 | 151,276779 | 0,963839438 | 0,28852453 | 3,34058053 | 0,00083603 | 0,00460089 |          |
| ENSGALG00000012681 | 687,549661 | 0,96179459  | 0,19337383 | 4,97375784 | 6,57E-07   | 8,84E-06   | MBOAT1   |
| ENSGALG00000026914 | 303,146434 | 0,960831377 | 0,2341299  | 4,10383883 | 4,06E-05   | 0,00034533 | DOK3     |
| ENSGALG00000016597 | 546,580903 | 0,96044418  | 0,2115615  | 4,53978708 | 5,63E-06   | 6,12E-05   |          |
| ENSGALG00000028041 | 172,712765 | 0,96010795  | 0,29281701 | 3,27886677 | 0,00104225 | 0,00552416 | DKK2     |
| ENSGALG00000008317 | 155,968503 | 0,958791686 | 0,29825236 | 3,21469944 | 0,00130581 | 0,00666615 | SDSL     |
| ENSGALG00000006192 | 588,22456  | 0,958606154 | 0,19869528 | 4,82450397 | 1,40E-06   | 1,77E-05   |          |
| ENSGALG00000009896 | 1725,9341  | 0,956710434 | 0,138947   | 6,88543432 | 5,76E-12   | 1,88E-10   | TRERF1   |
| ENSGALG00000008936 | 346,610654 | 0,956545148 | 0,23935184 | 3,99639774 | 6,43E-05   | 0,00051087 |          |
| ENSGALG00000012577 | 1716,87461 | 0,956309243 | 0,13789127 | 6,93524147 | 4,06E-12   | 1,35E-10   | FRMD3    |
| ENSGALG00000016945 | 3627,68031 | 0,953551228 | 0,1270066  | 7,5078871  | 6,01E-14   | 2,53E-12   | LECT1    |
| ENSGALG00000014843 | 607,093989 | 0,953307805 | 0,21113346 | 4,51519047 | 6,33E-06   | 6,80E-05   | TPD52L1  |
| ENSGALG00000029150 | 2513,11501 | 0,953288378 | 0,14860816 | 6,41477801 | 1,41E-10   | 3,76E-09   | AK1      |
| ENSGALG00000000295 | 158,361127 | 0,951838119 | 0,2874721  | 3,31106259 | 0,00092942 | 0,00504148 |          |
| ENSGALG00000002008 | 770,021515 | 0,951550674 | 0,26369144 | 3,60857625 | 0,00030788 | 0,00198664 | RNF157   |
| ENSGALG00000017926 | 117,345158 | 0,950771836 | 0,30495213 | 3,11777407 | 0,00182222 | 0,00871735 | 7SK      |
| ENSGALG00000009123 | 138,335079 | 0,94996493  | 0,29437793 | 3,22702502 | 0,00125085 | 0,00643402 |          |
| ENSGALG00000011046 | 918,666805 | 0,946061534 | 0,22454083 | 4,21331632 | 2,52E-05   | 0,00022872 | SNX10    |
| ENSGALG00000004792 | 282,665704 | 0,945718297 | 0,26094655 | 3,62418393 | 0,00028988 | 0,00188564 |          |
| ENSGALG00000006988 | 545,963197 | 0,944077449 | 0,23809277 | 3,96516647 | 7,33E-05   | 0,00057357 |          |
| ENSGALG00000009002 | 180,825204 | 0,943061124 | 0,27453332 | 3,43514266 | 0,00059224 | 0,00345327 |          |
| ENSGALG00000003370 | 6860,89746 | 0,941055859 | 0,11588753 | 8,12042401 | 4,65E-16   | 2,56E-14   | KIAA1191 |
| ENSGALG00000015183 | 541,002513 | 0,940741895 | 0,24692948 | 3,80975932 | 0,0001391  | 0,00099941 | RAB13    |
| ENSGALG00000010977 | 629,762637 | 0,94045823  | 0,18538133 | 5,07310108 | 3,91E-07   | 5,55E-06   | FAM221A  |
| ENSGALG00000017169 | 2527,40437 | 0,94013642  | 0,1550564  | 6,06319017 | 1,33E-09   | 3,11E-08   | ELMOD1   |
| ENSGALG00000006351 | 260,931586 | 0,940035694 | 0,25660603 | 3,66334215 | 0,00024895 | 0,00165256 | FAS      |
| ENSGALG00000007415 | 599,165563 | 0,938743099 | 0,23705941 | 3,95994876 | 7,50E-05   | 0,0005829  |          |

|                    |            |             |            |            |            |            |          |
|--------------------|------------|-------------|------------|------------|------------|------------|----------|
| ENSGALG00000002678 | 150,077896 | 0,938682309 | 0,29361496 | 3,19698392 | 0,00138873 | 0,00700797 | CSPG4    |
| ENSGALG00000003832 | 1422,76359 | 0,938218604 | 0,14754036 | 6,35906414 | 2,03E-10   | 5,31E-09   | TEX264   |
| ENSGALG00000009725 | 763,677984 | 0,938023358 | 0,22425701 | 4,182805   | 2,88E-05   | 0,00025631 | SCG5     |
| ENSGALG00000015967 | 204,249989 | 0,936813576 | 0,2634911  | 3,55538981 | 0,00037742 | 0,0023603  | LRRTM1   |
| ENSGALG00000002473 | 480,317696 | 0,93617222  | 0,20261658 | 4,62041265 | 3,83E-06   | 4,35E-05   | GPR157   |
| ENSGALG00000015926 | 1110,05542 | 0,934566237 | 0,15987762 | 5,84550999 | 5,05E-09   | 1,06E-07   |          |
| ENSGALG00000001398 | 801,871514 | 0,933503925 | 0,17565694 | 5,31435844 | 1,07E-07   | 1,71E-06   |          |
| ENSGALG00000028292 | 453,150865 | 0,931661788 | 0,25026444 | 3,72270944 | 0,0001971  | 0,00134712 |          |
| ENSGALG00000008735 | 158,650282 | 0,931477748 | 0,29513805 | 3,15607472 | 0,00159908 | 0,00784557 |          |
| ENSGALG00000010139 | 381,674313 | 0,931031468 | 0,2175137  | 4,28033488 | 1,87E-05   | 0,00017632 | SSTR1    |
| ENSGALG00000002843 | 586,866611 | 0,930974563 | 0,19321147 | 4,81842275 | 1,45E-06   | 1,82E-05   | RILP     |
| ENSGALG00000023626 | 1834,26904 | 0,929476271 | 0,16548518 | 5,61667362 | 1,95E-08   | 3,65E-07   | NTN1     |
| ENSGALG00000028091 | 182,303874 | 0,927849672 | 0,28991773 | 3,20038958 | 0,00137242 | 0,00694328 | MYF5     |
| ENSGALG00000023517 | 259,64579  | 0,925400404 | 0,25687314 | 3,60255801 | 0,0003151  | 0,00202459 | AGPAT2   |
| ENSGALG00000005626 | 609,645166 | 0,92496767  | 0,21590969 | 4,2840488  | 1,84E-05   | 0,00017352 | TPST2    |
| ENSGALG00000000311 | 558,408468 | 0,92295118  | 0,21535867 | 4,2856468  | 1,82E-05   | 0,00017251 |          |
| ENSGALG00000015207 | 1291,12938 | 0,92039826  | 0,14720064 | 6,25267856 | 4,03E-10   | 1,00E-08   |          |
| ENSGALG00000023936 | 805,049393 | 0,918539777 | 0,20126409 | 4,56385321 | 5,02E-06   | 5,56E-05   |          |
| ENSGALG00000011709 | 513,362717 | 0,918333355 | 0,23178437 | 3,96201584 | 7,43E-05   | 0,0005792  |          |
| ENSGALG00000027622 | 398,876868 | 0,916634803 | 0,26586468 | 3,44774944 | 0,00056528 | 0,00332452 |          |
| ENSGALG00000015795 | 539,939541 | 0,91628777  | 0,2153216  | 4,25543833 | 2,09E-05   | 0,00019456 | ADAMTS5  |
| ENSGALG00000005120 | 2531,22001 | 0,916224882 | 0,15496532 | 5,91245108 | 3,37E-09   | 7,37E-08   |          |
| ENSGALG00000013071 | 1399,47707 | 0,914850391 | 0,17423001 | 5,25081979 | 1,51E-07   | 2,35E-06   |          |
| ENSGALG00000010382 | 346,13588  | 0,914779385 | 0,22801207 | 4,01197789 | 6,02E-05   | 0,00048223 |          |
| ENSGALG00000004309 | 938,335478 | 0,913060877 | 0,18553484 | 4,92123686 | 8,60E-07   | 1,13E-05   | GDAP1L1  |
| ENSGALG00000028622 | 281,675272 | 0,912974481 | 0,25598956 | 3,56645202 | 0,00036185 | 0,00228081 | PEAR1    |
| ENSGALG00000005331 | 677,48087  | 0,912514017 | 0,17989387 | 5,07251308 | 3,93E-07   | 5,56E-06   | GJC2     |
| ENSGALG00000027462 | 1468,67221 | 0,912376278 | 0,14323943 | 6,36958898 | 1,90E-10   | 4,98E-09   | P3H4     |
| ENSGALG00000015789 | 559,929943 | 0,912066241 | 0,21238691 | 4,29436183 | 1,75E-05   | 0,00016704 |          |
| ENSGALG00000010551 | 919,316948 | 0,911984879 | 0,18322857 | 4,97730716 | 6,45E-07   | 8,70E-06   | CDC42EP3 |
| ENSGALG00000012298 | 550,04797  | 0,911513817 | 0,22249482 | 4,09678677 | 4,19E-05   | 0,00035361 | SLC39A8  |
| ENSGALG00000003588 | 1398,60382 | 0,911216657 | 0,1584852  | 5,74953779 | 8,95E-09   | 1,78E-07   |          |
| ENSGALG00000005814 | 212,002946 | 0,910795359 | 0,27185501 | 3,35029823 | 0,00080725 | 0,00447521 |          |
| ENSGALG00000002581 | 512,901786 | 0,910753526 | 0,19519764 | 4,66580184 | 3,07E-06   | 3,56E-05   | HTATIP2  |
| ENSGALG00000004676 | 1678,58309 | 0,910530695 | 0,14330969 | 6,35358792 | 2,10E-10   | 5,48E-09   |          |
| ENSGALG00000023195 | 260,809859 | 0,909179266 | 0,24717134 | 3,67833616 | 0,00023476 | 0,00156833 | DLX6     |
| ENSGALG00000015725 | 901,983472 | 0,907979483 | 0,17014105 | 5,33662782 | 9,47E-08   | 1,53E-06   |          |
| ENSGALG00000007114 | 305,818525 | 0,907573399 | 0,27679712 | 3,27883977 | 0,00104235 | 0,00552416 | APOA1    |
| ENSGALG00000003018 | 309,190261 | 0,906093174 | 0,24885213 | 3,64109068 | 0,00027149 | 0,00177706 |          |
| ENSGALG00000013886 | 841,136602 | 0,904236576 | 0,1804703  | 5,01044535 | 5,43E-07   | 7,51E-06   | LDLRAD4  |
| ENSGALG00000021442 | 473,215804 | 0,903637173 | 0,22582203 | 4,00154571 | 6,29E-05   | 0,00050105 | CARMIL2  |
| ENSGALG00000005014 | 159,559707 | 0,903243848 | 0,28943129 | 3,12075394 | 0,00180389 | 0,00864482 | AIPL1    |
| ENSGALG00000002963 | 189,406665 | 0,902926335 | 0,26991157 | 3,34526731 | 0,00082203 | 0,00453545 | PID1     |
| ENSGALG00000000836 | 482,381548 | 0,902335572 | 0,20852451 | 4,32723978 | 1,51E-05   | 0,00014747 | RFX5     |
| ENSGALG00000011124 | 436,071233 | 0,902068067 | 0,20974945 | 4,30069344 | 1,70E-05   | 0,000163   | ARHGAP24 |
| ENSGALG00000010827 | 4357,48343 | 0,901311467 | 0,11466976 | 7,86006222 | 3,84E-15   | 1,84E-13   |          |
| ENSGALG00000008461 | 387,656717 | 0,900341356 | 0,24810826 | 3,62882455 | 0,00028471 | 0,0018574  |          |
| ENSGALG00000010119 | 1290,75662 | 0,900097678 | 0,1879287  | 4,78957    | 1,67E-06   | 2,06E-05   | CDKL2    |
| ENSGALG00000020905 | 199,737945 | 0,899806675 | 0,28234109 | 3,18694908 | 0,00143782 | 0,00720498 | KSR2     |
| ENSGALG00000006793 | 399,969639 | 0,898163749 | 0,21225276 | 4,23157623 | 2,32E-05   | 0,0002129  |          |
| ENSGALG00000008632 | 774,98804  | 0,897411708 | 0,17277465 | 5,19411687 | 2,06E-07   | 3,11E-06   | ACSS1    |
| ENSGALG00000001896 | 633,555504 | 0,897398544 | 0,18298068 | 4,90433493 | 9,37E-07   | 1,23E-05   |          |
| ENSGALG00000006083 | 883,458305 | 0,896818662 | 0,18476425 | 4,85385374 | 1,21E-06   | 1,55E-05   |          |
| ENSGALG00000007052 | 507,965349 | 0,895651499 | 0,20347805 | 4,40171068 | 1,07E-05   | 0,00010986 | PXK      |
| ENSGALG00000015977 | 788,487319 | 0,89563673  | 0,20705245 | 4,32565141 | 1,52E-05   | 0,00014811 | SMOX     |
| ENSGALG00000008262 | 171,789815 | 0,894529697 | 0,28118642 | 3,18126918 | 0,00146631 | 0,0072994  | RASGRF1  |
| ENSGALG00000000374 | 1105,84307 | 0,894239416 | 0,18770457 | 4,76407913 | 1,90E-06   | 2,30E-05   | RNPEP    |
| ENSGALG00000017204 | 419,662559 | 0,891856915 | 0,22247021 | 4,00888239 | 6,10E-05   | 0,00048802 |          |
| ENSGALG00000002854 | 440,265325 | 0,890941536 | 0,2420509  | 3,68080247 | 0,0002325  | 0,00155583 |          |
| ENSGALG00000005203 | 773,684672 | 0,889220424 | 0,2133641  | 4,16761968 | 3,08E-05   | 0,00027177 | OLFM3    |
| ENSGALG00000027603 | 933,535269 | 0,889190298 | 0,16664995 | 5,33567704 | 9,52E-08   | 1,54E-06   |          |
| ENSGALG00000003932 | 494,661014 | 0,888085177 | 0,22917231 | 3,87518533 | 0,00010654 | 0,00079397 | SDC4     |



|                     |            |             |            |            |            |            |          |
|---------------------|------------|-------------|------------|------------|------------|------------|----------|
| ENSGALG00000010269  | 1110,19342 | 0,886301871 | 0,16512328 | 5,36751612 | 7,98E-08   | 1,31E-06   | KCNAB1   |
| ENSGALG00000004093  | 635,621253 | 0,885654514 | 0,20975364 | 4,2223558  | 2,42E-05   | 0,00022106 | TBX22    |
| ENSGALG000000015788 | 630,459367 | 0,884593035 | 0,2015792  | 4,38831513 | 1,14E-05   | 0,00011598 |          |
| ENSGALG000000004970 | 368,256584 | 0,884420332 | 0,25182556 | 3,51203558 | 0,00044469 | 0,00271743 |          |
| ENSGALG000000026152 | 376,28373  | 0,884418189 | 0,23205448 | 3,8112524  | 0,00013826 | 0,00099391 |          |
| ENSGALG000000025733 | 660,61374  | 0,882587352 | 0,1955092  | 4,51430076 | 6,35E-06   | 6,83E-05   |          |
| ENSGALG000000006008 | 1270,65336 | 0,882382705 | 0,1743852  | 5,05996316 | 4,19E-07   | 5,90E-06   | HOMER2   |
| ENSGALG000000027027 | 1969,08091 | 0,882215122 | 0,16312702 | 5,40814829 | 6,37E-08   | 1,07E-06   |          |
| ENSGALG000000003270 | 387,810885 | 0,881994372 | 0,21359889 | 4,12920868 | 3,64E-05   | 0,00031348 |          |
| ENSGALG000000008349 | 209,566568 | 0,879571782 | 0,26093775 | 3,37081072 | 0,00074947 | 0,00420787 | LMCD1    |
| ENSGALG000000009601 | 8743,38719 | 0,878730197 | 0,13764581 | 6,38399544 | 1,73E-10   | 4,59E-09   | NELL2    |
| ENSGALG000000027920 | 386,752165 | 0,874011674 | 0,22844437 | 3,82592791 | 0,00013028 | 0,00094249 |          |
| ENSGALG000000026059 | 270,416326 | 0,873870501 | 0,23970989 | 3,64553371 | 0,00026684 | 0,00175077 |          |
| ENSGALG000000016017 | 590,769047 | 0,873175292 | 0,21544948 | 4,05280753 | 5,06E-05   | 0,00041599 | SLC4A11  |
| ENSGALG000000005974 | 256,914188 | 0,872920311 | 0,25210037 | 3,46259042 | 0,000535   | 0,00317388 | COL6A1   |
| ENSGALG000000001129 | 1785,04064 | 0,871868135 | 0,15304444 | 5,69682996 | 1,22E-08   | 2,38E-07   |          |
| ENSGALG000000009867 | 212,190543 | 0,869748432 | 0,26750592 | 3,25132407 | 0,00114869 | 0,00599972 |          |
| ENSGALG000000027364 | 6291,5882  | 0,867638443 | 0,1162491  | 7,46361451 | 8,42E-14   | 3,48E-12   |          |
| ENSGALG000000011624 | 479,035185 | 0,867273579 | 0,2018671  | 4,29626011 | 1,74E-05   | 0,00016596 | PNLDC1   |
| ENSGALG000000016384 | 268,592265 | 0,867172927 | 0,26856807 | 3,2288758  | 0,00124278 | 0,00640113 | MYT1L    |
| ENSGALG000000026172 | 493,174963 | 0,865691508 | 0,21117972 | 4,09931168 | 4,14E-05   | 0,00035078 |          |
| ENSGALG000000003895 | 788,021122 | 0,861640305 | 0,25898235 | 3,32702328 | 0,00087779 | 0,00479965 | PRDM12   |
| ENSGALG000000012072 | 201,724233 | 0,861021311 | 0,27532993 | 3,12723472 | 0,00176459 | 0,00849837 |          |
| ENSGALG000000000953 | 1344,71246 | 0,860062109 | 0,16163754 | 5,32093044 | 1,03E-07   | 1,66E-06   |          |
| ENSGALG000000009902 | 340,496837 | 0,859561208 | 0,24909364 | 3,4507553  | 0,00055902 | 0,00329341 | CFAP57   |
| ENSGALG000000005655 | 299,935919 | 0,858231064 | 0,25571117 | 3,3562518  | 0,00079007 | 0,0044067  | TSPEAR   |
| ENSGALG000000017072 | 1099,84084 | 0,857400203 | 0,18100217 | 4,73696081 | 2,17E-06   | 2,59E-05   | N4BP2L1  |
| ENSGALG000000025919 | 2494,48854 | 0,857090747 | 0,142817   | 6,00132156 | 1,96E-09   | 4,45E-08   |          |
| ENSGALG000000015768 | 2710,70193 | 0,855142896 | 0,12974855 | 6,59077029 | 4,38E-11   | 1,25E-09   |          |
| ENSGALG000000010664 | 712,177105 | 0,852579615 | 0,22881793 | 3,72601745 | 0,00019453 | 0,00133284 | KIF26B   |
| ENSGALG000000001189 | 452,192377 | 0,851541498 | 0,20637637 | 4,12615796 | 3,69E-05   | 0,00031686 | NCF1     |
| ENSGALG000000009536 | 446,627716 | 0,851130737 | 0,22757849 | 3,73994373 | 0,00018406 | 0,00127273 |          |
| ENSGALG000000003612 | 268,623077 | 0,850682606 | 0,26697919 | 3,18632551 | 0,00144092 | 0,00721787 |          |
| ENSGALG000000023172 | 1255,76162 | 0,849498162 | 0,15375274 | 5,52509283 | 3,29E-08   | 5,85E-07   |          |
| ENSGALG000000026671 | 2116,56921 | 0,847898773 | 0,14258676 | 5,94654652 | 2,74E-09   | 6,10E-08   |          |
| ENSGALG000000002742 | 2787,33871 | 0,847416181 | 0,14490214 | 5,84819627 | 4,97E-09   | 1,04E-07   | TMEM132B |
| ENSGALG000000005791 | 520,608854 | 0,84592391  | 0,20398465 | 4,14699797 | 3,37E-05   | 0,00029344 |          |
| ENSGALG000000009603 | 307,914805 | 0,844955114 | 0,23876567 | 3,53884673 | 0,00040188 | 0,00249616 |          |
| ENSGALG000000006379 | 1670,52626 | 0,844378171 | 0,18274684 | 4,62048036 | 3,83E-06   | 4,35E-05   | SHH      |
| ENSGALG000000005895 | 481,788237 | 0,844174027 | 0,20498441 | 4,11823536 | 3,82E-05   | 0,00032712 |          |
| ENSGALG000000004593 | 2963,70805 | 0,839985137 | 0,15590672 | 5,38774176 | 7,13E-08   | 1,18E-06   | SULF2    |
| ENSGALG000000010857 | 11562,2517 | 0,839106931 | 0,11368089 | 7,38124899 | 1,57E-13   | 6,34E-12   | Dab1     |
| ENSGALG000000026505 | 1579,97582 | 0,837091894 | 0,15268322 | 5,48254005 | 4,19E-08   | 7,29E-07   |          |
| ENSGALG000000003354 | 276,830006 | 0,837083394 | 0,24777884 | 3,37834895 | 0,00072922 | 0,00411775 | KCNH4    |
| ENSGALG000000011205 | 1172,74221 | 0,836341019 | 0,20119253 | 4,15691891 | 3,23E-05   | 0,00028261 | SMOC2    |
| ENSGALG000000005161 | 2738,71244 | 0,836184904 | 0,13858143 | 6,03388843 | 1,60E-09   | 3,70E-08   |          |
| ENSGALG000000006014 | 961,400691 | 0,836085862 | 0,15943435 | 5,24407593 | 1,57E-07   | 2,43E-06   |          |
| ENSGALG000000007770 | 193,517852 | 0,835610241 | 0,26849664 | 3,11218139 | 0,0018571  | 0,00885001 |          |
| ENSGALG000000028582 | 1565,14033 | 0,832821984 | 0,15076847 | 5,52384707 | 3,32E-08   | 5,87E-07   |          |
| ENSGALG000000005481 | 1783,10991 | 0,83266607  | 0,14481077 | 5,75002865 | 8,92E-09   | 1,77E-07   | ARHGEF3  |
| ENSGALG000000015660 | 2889,81934 | 0,831570906 | 0,12282495 | 6,77037458 | 1,28E-11   | 4,00E-10   | SNX30    |
| ENSGALG000000028125 | 921,395648 | 0,831550629 | 0,18036279 | 4,6104334  | 4,02E-06   | 4,52E-05   |          |
| ENSGALG000000025776 | 414,67908  | 0,83014723  | 0,21462899 | 3,86782432 | 0,00010981 | 0,00081166 |          |
| ENSGALG000000027903 | 10650,6436 | 0,829170411 | 0,11053296 | 7,50156702 | 6,31E-14   | 2,64E-12   |          |
| ENSGALG000000010500 | 3026,41246 | 0,828235743 | 0,13002656 | 6,36974259 | 1,89E-10   | 4,98E-09   | NKX6-2   |
| ENSGALG000000007015 | 336,010164 | 0,825119263 | 0,22964958 | 3,59294921 | 0,00032696 | 0,00209581 | CD40     |
| ENSGALG000000015720 | 662,971603 | 0,824601233 | 0,20777276 | 3,96876479 | 7,22E-05   | 0,00056596 | CHODL    |
| ENSGALG000000011744 | 1298,60197 | 0,824149013 | 0,17298432 | 4,76429887 | 1,90E-06   | 2,30E-05   |          |
| ENSGALG000000016558 | 512,367292 | 0,822973317 | 0,20099047 | 4,09458879 | 4,23E-05   | 0,00035587 | VEGFD    |
| ENSGALG000000001688 | 9554,36542 | 0,822044682 | 0,12651935 | 6,49738304 | 8,17E-11   | 2,27E-09   | sept-05  |
| ENSGALG000000015941 | 330,156486 | 0,819153887 | 0,23360451 | 3,50658414 | 0,0004539  | 0,00276255 |          |
| ENSGALG000000019768 | 3223,32241 | 0,819142269 | 0,12221578 | 6,70242617 | 2,05E-11   | 6,19E-10   | ACSF2    |

|                    |            |             |            |            |            |            |          |
|--------------------|------------|-------------|------------|------------|------------|------------|----------|
| ENSGALG00000010698 | 1578,35111 | 0,816916741 | 0,1404823  | 5,81508672 | 6,06E-09   | 1,25E-07   |          |
| ENSGALG00000012628 | 1115,10605 | 0,816609796 | 0,18822357 | 4,33850978 | 1,43E-05   | 0,00014153 | HABP4    |
| ENSGALG00000027534 | 844,147038 | 0,815389343 | 0,17402749 | 4,68540539 | 2,79E-06   | 3,27E-05   |          |
| ENSGALG00000010397 | 282,533201 | 0,813527008 | 0,25347167 | 3,20953824 | 0,00132948 | 0,0067667  | GRID2    |
| ENSGALG00000027338 | 409,810985 | 0,813282814 | 0,21988916 | 3,6986034  | 0,00021679 | 0,00146626 |          |
| ENSGALG00000015297 | 1260,54646 | 0,81224071  | 0,16743713 | 4,8510192  | 1,23E-06   | 1,57E-05   | FOXO3    |
| ENSGALG00000000954 | 405,070556 | 0,812029159 | 0,24204134 | 3,35491929 | 0,00079388 | 0,00442073 |          |
| ENSGALG00000006480 | 1820,43736 | 0,810690895 | 0,14795092 | 5,47945836 | 4,27E-08   | 7,41E-07   | TCF7     |
| ENSGALG00000011861 | 430,597577 | 0,810665245 | 0,21257164 | 3,81360956 | 0,00013695 | 0,00098656 | SYT16    |
| ENSGALG00000009680 | 349,521496 | 0,809243098 | 0,22080925 | 3,6648968  | 0,00024744 | 0,00164472 | PAQR7    |
| ENSGALG00000015051 | 777,652051 | 0,807158582 | 0,18251219 | 4,42249142 | 9,76E-06   | 0,00010087 | CDK19    |
| ENSGALG00000013051 | 1092,69729 | 0,806546944 | 0,19222288 | 4,19589469 | 2,72E-05   | 0,00024358 |          |
| ENSGALG00000005147 | 486,928416 | 0,80606613  | 0,20058324 | 4,0186116  | 5,85E-05   | 0,00047135 |          |
| ENSGALG00000017016 | 265,337815 | 0,804980828 | 0,247719   | 3,24957242 | 0,00115579 | 0,00602451 | FAM124A  |
| ENSGALG00000015608 | 746,798973 | 0,802634493 | 0,1733654  | 4,62972702 | 3,66E-06   | 4,17E-05   | ADRA2C   |
| ENSGALG00000011394 | 463,382496 | 0,801850887 | 0,20513291 | 3,9089335  | 9,27E-05   | 0,0007038  |          |
| ENSGALG00000007565 | 677,702896 | 0,798729286 | 0,22132239 | 3,60889512 | 0,0003075  | 0,00198514 | PPP2R2B  |
| ENSGALG00000012073 | 470,076315 | 0,797159786 | 0,20392037 | 3,90917193 | 9,26E-05   | 0,0007038  |          |
| ENSGALG00000008408 | 1323,03511 | 0,796075417 | 0,15213548 | 5,23267422 | 1,67E-07   | 2,57E-06   | GAB3     |
| ENSGALG00000014122 | 10545,592  | 0,795943411 | 0,13498611 | 5,89648381 | 3,71E-09   | 8,08E-08   | CYB5R3   |
| ENSGALG00000013489 | 630,058844 | 0,794845244 | 0,18721113 | 4,24571568 | 2,18E-05   | 0,00020195 |          |
| ENSGALG00000015233 | 5666,23676 | 0,794464087 | 0,15751312 | 5,0437964  | 4,56E-07   | 6,39E-06   | ATP1B1   |
| ENSGALG00000006507 | 1217,4322  | 0,793097237 | 0,15342058 | 5,16943198 | 2,35E-07   | 3,49E-06   | CLMP     |
| ENSGALG00000026605 | 1028,74302 | 0,792369586 | 0,15815822 | 5,00998056 | 5,44E-07   | 7,52E-06   |          |
| ENSGALG00000007720 | 244,442979 | 0,792327844 | 0,25557464 | 3,1001818  | 0,00193402 | 0,009178   | AIFM3    |
| ENSGALG00000006319 | 831,267138 | 0,791303644 | 0,17376438 | 4,55388859 | 5,27E-06   | 5,80E-05   |          |
| ENSGALG00000028576 | 735,470308 | 0,790565069 | 0,23138694 | 3,4166365  | 0,000634   | 0,00365294 |          |
| ENSGALG00000010708 | 2290,46376 | 0,790532368 | 0,15028519 | 5,26021489 | 1,44E-07   | 2,24E-06   | ICA1     |
| ENSGALG00000021589 | 1830,74644 | 0,790216265 | 0,177386   | 4,45478374 | 8,40E-06   | 8,83E-05   | RTN4RL1  |
| ENSGALG00000027458 | 914,195785 | 0,790135397 | 0,16348734 | 4,83300661 | 1,34E-06   | 1,70E-05   |          |
| ENSGALG00000014300 | 310,956459 | 0,790002156 | 0,25045648 | 3,15424928 | 0,00160912 | 0,00788629 |          |
| ENSGALG00000013862 | 6295,07557 | 0,789845326 | 0,14390944 | 5,48848856 | 4,05E-08   | 7,08E-07   | OLIG3    |
| ENSGALG00000026899 | 678,260512 | 0,789824953 | 0,18654004 | 4,2340774  | 2,29E-05   | 0,00021097 |          |
| ENSGALG00000020522 | 2265,96477 | 0,78974705  | 0,15263795 | 5,17398877 | 2,29E-07   | 3,42E-06   |          |
| ENSGALG00000009039 | 1670,74492 | 0,789311851 | 0,14682451 | 5,375886   | 7,62E-08   | 1,25E-06   |          |
| ENSGALG00000003933 | 4489,5312  | 0,788744436 | 0,13110215 | 6,01625856 | 1,78E-09   | 4,11E-08   | QSOX1    |
| ENSGALG00000013642 | 1029,71125 | 0,788560165 | 0,16199374 | 4,86784356 | 1,13E-06   | 1,46E-05   |          |
| ENSGALG00000006453 | 2069,6286  | 0,788464487 | 0,15333542 | 5,14208958 | 2,72E-07   | 3,98E-06   |          |
| ENSGALG00000007623 | 3327,22263 | 0,788173273 | 0,13967263 | 5,64300463 | 1,67E-08   | 3,18E-07   | CACNA1G  |
| ENSGALG00000024097 | 498,632385 | 0,787003033 | 0,25367596 | 3,10239499 | 0,00191962 | 0,00911918 |          |
| ENSGALG00000005849 | 1033,38166 | 0,784505411 | 0,16373067 | 4,79143821 | 1,66E-06   | 2,05E-05   | PPDPF    |
| ENSGALG00000000076 | 922,879923 | 0,7843985   | 0,16221807 | 4,83545708 | 1,33E-06   | 1,68E-05   |          |
| ENSGALG00000012116 | 675,676944 | 0,783832372 | 0,18759243 | 4,17837954 | 2,94E-05   | 0,00026058 |          |
| ENSGALG00000011635 | 890,924795 | 0,783625313 | 0,17783173 | 4,40655507 | 1,05E-05   | 0,00010776 | TFCP2L1  |
| ENSGALG00000027788 | 2064,81163 | 0,782858625 | 0,18478838 | 4,23651437 | 2,27E-05   | 0,00020926 | CPE      |
| ENSGALG00000009866 | 599,485373 | 0,782677583 | 0,20855076 | 3,75293566 | 0,00017478 | 0,00122029 |          |
| ENSGALG00000020376 | 2337,04095 | 0,781084057 | 0,12991704 | 6,01217582 | 1,83E-09   | 4,20E-08   |          |
| ENSGALG00000007357 | 1727,63044 | 0,780757803 | 0,17882552 | 4,36603111 | 1,27E-05   | 0,00012639 | BCL6     |
| ENSGALG00000009407 | 420,644478 | 0,780277328 | 0,21471092 | 3,63408309 | 0,00027897 | 0,00182342 |          |
| ENSGALG00000021620 | 400,193416 | 0,780112352 | 0,21582196 | 3,61461062 | 0,0003008  | 0,00194647 | TMEM59L  |
| ENSGALG00000005657 | 1485,50445 | 0,780089243 | 0,20993525 | 3,71585638 | 0,00020252 | 0,00137863 | CRHR2    |
| ENSGALG00000017065 | 605,990734 | 0,779643959 | 0,22129554 | 3,52308929 | 0,00042655 | 0,00263018 |          |
| ENSGALG00000015379 | 3926,96098 | 0,779239634 | 0,17207727 | 4,5284285  | 5,94E-06   | 6,41E-05   | TAGLN3   |
| ENSGALG00000005539 | 507,508669 | 0,77704495  | 0,19834408 | 3,9176614  | 8,94E-05   | 0,00068237 |          |
| ENSGALG00000009612 | 1284,26197 | 0,776962988 | 0,15672769 | 4,95740715 | 7,14E-07   | 9,55E-06   |          |
| ENSGALG00000005421 | 527,433616 | 0,776882668 | 0,19330399 | 4,01896854 | 5,85E-05   | 0,00047091 |          |
| ENSGALG00000026326 | 2889,79677 | 0,77526969  | 0,14658762 | 5,28878011 | 1,23E-07   | 1,94E-06   |          |
| ENSGALG00000002708 | 2271,23083 | 0,772455755 | 0,1693238  | 4,56200355 | 5,07E-06   | 5,60E-05   | LINGO1   |
| ENSGALG00000013404 | 465,070427 | 0,770980594 | 0,20453334 | 3,76946168 | 0,0001636  | 0,00115171 |          |
| ENSGALG00000002283 | 1172,58396 | 0,770174106 | 0,17180246 | 4,482905   | 7,36E-06   | 7,80E-05   | MAPKAPK3 |
| ENSGALG00000017208 | 521,560672 | 0,769802089 | 0,19597474 | 3,92806787 | 8,56E-05   | 0,0006572  | AMOTL1   |
| ENSGALG00000027592 | 1174,35152 | 0,765780883 | 0,16676307 | 4,59202906 | 4,39E-06   | 4,91E-05   | ERN2     |

|                     |            |             |            |            |            |            |            |
|---------------------|------------|-------------|------------|------------|------------|------------|------------|
| ENSGALG00000005779  | 2301,58905 | 0,765244932 | 0,12900388 | 5,93195293 | 2,99E-09   | 6,58E-08   |            |
| ENSGALG00000006900  | 414,726982 | 0,764663976 | 0,24206393 | 3,15893399 | 0,00158347 | 0,00778022 |            |
| ENSGALG00000004323  | 3702,95548 | 0,7637615   | 0,15205572 | 5,02290526 | 5,09E-07   | 7,07E-06   | RASAL2     |
| ENSGALG00000007744  | 1224,40316 | 0,76351713  | 0,16453915 | 4,64033711 | 3,48E-06   | 3,98E-05   | CASS4      |
| ENSGALG00000002069  | 610,168852 | 0,761037525 | 0,20960313 | 3,63085008 | 0,00028249 | 0,00184376 |            |
| ENSGALG000000013948 | 736,872876 | 0,760675086 | 0,17278143 | 4,40252804 | 1,07E-05   | 0,00010953 | RASL11B    |
| ENSGALG00000007956  | 2266,7266  | 0,759404394 | 0,14550515 | 5,2190893  | 1,80E-07   | 2,75E-06   | PLXDC2     |
| ENSGALG00000007748  | 2468,69748 | 0,758936347 | 0,12655699 | 5,9967954  | 2,01E-09   | 4,56E-08   | SLC16A2    |
| ENSGALG00000004170  | 385,321336 | 0,75875998  | 0,23438122 | 3,23729002 | 0,00120671 | 0,00624926 | ADA        |
| ENSGALG000000015688 | 1188,53051 | 0,758515207 | 0,17302156 | 4,38393456 | 1,17E-05   | 0,00011807 | MXD4       |
| ENSGALG000000003115 | 505,204817 | 0,756684773 | 0,20221429 | 3,74199456 | 0,00018257 | 0,00126624 |            |
| ENSGALG00000007889  | 769,261981 | 0,756666335 | 0,18466224 | 4,09756933 | 4,18E-05   | 0,00035285 |            |
| ENSGALG00000006346  | 1339,32033 | 0,756405715 | 0,1832878  | 4,12687423 | 3,68E-05   | 0,00031627 | CXCL14     |
| ENSGALG000000026153 | 524,420919 | 0,755983234 | 0,23146908 | 3,26602248 | 0,0010907  | 0,00574239 |            |
| ENSGALG00000002958  | 2112,95038 | 0,755313619 | 0,16744802 | 4,51073495 | 6,46E-06   | 6,90E-05   | DNER       |
| ENSGALG000000001311 | 1301,90092 | 0,752137925 | 0,15185177 | 4,95310607 | 7,30E-07   | 9,72E-06   |            |
| ENSGALG000000027905 | 3422,01429 | 0,751625166 | 0,13298701 | 5,65186918 | 1,59E-08   | 3,03E-07   | CSRNP1     |
| ENSGALG00000009439  | 631,532608 | 0,751125582 | 0,2024985  | 3,70928955 | 0,00020784 | 0,00141276 | GPR85      |
| ENSGALG000000029047 | 339,90745  | 0,749178885 | 0,22666604 | 3,30521004 | 0,00094905 | 0,00512549 | TMEM204    |
| ENSGALG000000015729 | 1439,09217 | 0,747405326 | 0,14976    | 4,99068712 | 6,02E-07   | 8,18E-06   | LPAR1      |
| ENSGALG000000001969 | 1252,39504 | 0,746864271 | 0,15500447 | 4,81834019 | 1,45E-06   | 1,82E-05   |            |
| ENSGALG00000004420  | 2554,14464 | 0,745430944 | 0,15350993 | 4,85591338 | 1,20E-06   | 1,54E-05   | SDK1       |
| ENSGALG000000018733 | 341,104932 | 0,744919582 | 0,22358708 | 3,33167538 | 0,00086325 | 0,0047277  |            |
| ENSGALG000000005063 | 630,430329 | 0,74466275  | 0,19563887 | 3,8063128  | 0,00014105 | 0,0010113  | ST6GALNAC4 |
| ENSGALG000000026919 | 497,57567  | 0,743491927 | 0,20017411 | 3,71422615 | 0,00020383 | 0,00138686 |            |
| ENSGALG000000025937 | 424,74226  | 0,743354667 | 0,21925587 | 3,39035244 | 0,00069803 | 0,00397144 |            |
| ENSGALG000000012712 | 2097,8069  | 0,742584862 | 0,14980046 | 4,95716018 | 7,15E-07   | 9,56E-06   | RBM24      |
| ENSGALG000000015994 | 1103,99088 | 0,741778145 | 0,15501143 | 4,78531262 | 1,71E-06   | 2,10E-05   |            |
| ENSGALG000000001449 | 3789,5374  | 0,740070536 | 0,14515669 | 5,09842522 | 3,42E-07   | 4,93E-06   | STRA6      |
| ENSGALG000000026449 | 3878,57981 | 0,737442369 | 0,13363533 | 5,51831886 | 3,42E-08   | 6,04E-07   |            |
| ENSGALG000000002539 | 465,932804 | 0,737264559 | 0,21127231 | 3,4896412  | 0,00048367 | 0,00291895 | KCNN2      |
| ENSGALG000000008339 | 615,635733 | 0,736061451 | 0,19489251 | 3,77675604 | 0,00015888 | 0,00112083 |            |
| ENSGALG000000013002 | 3217,45336 | 0,734684533 | 0,14696976 | 4,99888241 | 5,77E-07   | 7,89E-06   | DAP1       |
| ENSGALG000000019087 | 2799,71591 | 0,734240753 | 0,12953887 | 5,66811147 | 1,44E-08   | 2,78E-07   | RFXAP      |
| ENSGALG000000011059 | 526,882943 | 0,733913318 | 0,20211997 | 3,6310777  | 0,00028224 | 0,00184302 |            |
| ENSGALG000000010326 | 286,241823 | 0,733495449 | 0,23722679 | 3,09195881 | 0,0019884  | 0,00938825 | FLVCR2     |
| ENSGALG000000008433 | 2910,77768 | 0,732487    | 0,13031486 | 5,62090169 | 1,90E-08   | 3,57E-07   |            |
| ENSGALG000000008076 | 5047,29607 | 0,731953468 | 0,12742676 | 5,74411123 | 9,24E-09   | 1,83E-07   | TMEM164    |
| ENSGALG000000006897 | 1904,48459 | 0,73176707  | 0,13708377 | 5,33810137 | 9,39E-08   | 1,52E-06   |            |
| ENSGALG000000025916 | 1511,63504 | 0,730226914 | 0,19711664 | 3,70454229 | 0,00021177 | 0,0014359  |            |
| ENSGALG000000002651 | 2712,11427 | 0,730025866 | 0,12886096 | 5,6652212  | 1,47E-08   | 2,82E-07   | ST3GAL2    |
| ENSGALG000000012191 | 7671,58272 | 0,72968259  | 0,12563695 | 5,80786629 | 6,33E-09   | 1,30E-07   |            |
| ENSGALG000000002451 | 1225,15716 | 0,728956851 | 0,15337655 | 4,75272686 | 2,01E-06   | 2,41E-05   |            |
| ENSGALG000000019317 | 6925,16498 | 0,728083244 | 0,12000428 | 6,06714384 | 1,30E-09   | 3,05E-08   |            |
| ENSGALG000000000400 | 352,092636 | 0,727285624 | 0,21940045 | 3,31487749 | 0,00091683 | 0,00498112 |            |
| ENSGALG000000014910 | 3784,53082 | 0,72588259  | 0,16231129 | 4,47216332 | 7,74E-06   | 8,18E-05   | COLEC12    |
| ENSGALG000000004875 | 3335,27386 | 0,724796191 | 0,1381226  | 5,24748459 | 1,54E-07   | 2,39E-06   | PEMT       |
| ENSGALG000000015123 | 798,450057 | 0,722653298 | 0,17223363 | 4,19577343 | 2,72E-05   | 0,00024358 | ZDHHC23    |
| ENSGALG000000026864 | 531,42097  | 0,721498621 | 0,20303604 | 3,55354952 | 0,00038007 | 0,00237478 | ZCCHC24    |
| ENSGALG000000011426 | 2063,22886 | 0,721230387 | 0,16133795 | 4,4703085  | 7,81E-06   | 8,24E-05   |            |
| ENSGALG000000000723 | 8396,32677 | 0,72079059  | 0,14050982 | 5,12982366 | 2,90E-07   | 4,21E-06   | STX12      |
| ENSGALG000000002558 | 389,45186  | 0,720642154 | 0,22908371 | 3,14575908 | 0,00165656 | 0,00806657 |            |
| ENSGALG000000001459 | 1037,33334 | 0,719793089 | 0,17879018 | 4,02590944 | 5,68E-05   | 0,00045941 | TNNC1      |
| ENSGALG000000007981 | 2067,61165 | 0,719546729 | 0,14285858 | 5,0367766  | 4,73E-07   | 6,61E-06   | CLN6       |
| ENSGALG000000009042 | 1726,61695 | 0,719468223 | 0,14937565 | 4,81650257 | 1,46E-06   | 1,83E-05   | ISM1       |
| ENSGALG000000003855 | 2094,24658 | 0,719100031 | 0,13684545 | 5,25483329 | 1,48E-07   | 2,31E-06   |            |
| ENSGALG000000015403 | 10307,4906 | 0,718054416 | 0,13178716 | 5,44859159 | 5,08E-08   | 8,65E-07   | EPHA3      |
| ENSGALG000000007383 | 515,088556 | 0,717575013 | 0,20175921 | 3,55659118 | 0,0003757  | 0,00235287 | HSPB8      |
| ENSGALG000000012792 | 5661,79807 | 0,717520705 | 0,12510356 | 5,73541388 | 9,73E-09   | 1,92E-07   | HIPK2      |
| ENSGALG000000013583 | 619,651043 | 0,717484093 | 0,2169479  | 3,30717227 | 0,00094243 | 0,00509578 | FAM114A1   |
| ENSGALG000000004812 | 420,513925 | 0,714148656 | 0,22761509 | 3,13752767 | 0,00170379 | 0,00826109 | FAM129A    |
| ENSGALG000000003340 | 440,9962   | 0,714011033 | 0,21324869 | 3,34825521 | 0,00081322 | 0,00449533 | GBGT1      |

|                     |            |             |            |            |            |            |         |
|---------------------|------------|-------------|------------|------------|------------|------------|---------|
| ENSGALG00000001233  | 1022,31515 | 0,713516886 | 0,17513042 | 4,07420311 | 4,62E-05   | 0,00038331 |         |
| ENSGALG00000007244  | 345,610478 | 0,711922899 | 0,2206692  | 3,22619966 | 0,00125446 | 0,00644774 | SIRT4   |
| ENSGALG00000009628  | 330,245656 | 0,711918795 | 0,2307632  | 3,08506204 | 0,0020351  | 0,00958086 |         |
| ENSGALG00000003282  | 5419,41789 | 0,711820753 | 0,11116608 | 6,40321912 | 1,52E-10   | 4,05E-09   | STAT5B  |
| ENSGALG00000007196  | 4102,69674 | 0,710478048 | 0,12809281 | 5,54658791 | 2,91E-08   | 5,23E-07   |         |
| ENSGALG00000003805  | 6589,80394 | 0,710406685 | 0,12973331 | 5,47590036 | 4,35E-08   | 7,53E-07   | PRKG1   |
| ENSGALG00000001130  | 1241,25137 | 0,709264893 | 0,16240514 | 4,36725635 | 1,26E-05   | 0,00012586 | WBSCR17 |
| ENSGALG00000002038  | 769,11793  | 0,706334316 | 0,17558941 | 4,02264751 | 5,75E-05   | 0,00046499 | DENND2C |
| ENSGALG000000028443 | 5716,4355  | 0,705249503 | 0,16905495 | 4,17171751 | 3,02E-05   | 0,00026727 |         |
| ENSGALG000000023738 | 705,328876 | 0,704601132 | 0,2001565  | 3,52025109 | 0,00043114 | 0,00265129 |         |
| ENSGALG000000010320 | 1626,02269 | 0,704383823 | 0,13846801 | 5,0869789  | 3,64E-07   | 5,19E-06   | PAWR    |
| ENSGALG000000026437 | 5573,48841 | 0,703536871 | 0,11568829 | 6,0813142  | 1,19E-09   | 2,80E-08   |         |
| ENSGALG00000004735  | 2180,59814 | 0,703327732 | 0,14882879 | 4,72575054 | 2,29E-06   | 2,73E-05   |         |
| ENSGALG000000026973 | 1340,81752 | 0,702510997 | 0,14635529 | 4,80003844 | 1,59E-06   | 1,97E-05   | KIF3C   |
| ENSGALG000000026873 | 606,998571 | 0,701267796 | 0,1971895  | 3,55631416 | 0,00037609 | 0,00235426 |         |
| ENSGALG000000023266 | 1017,69934 | 0,69953934  | 0,17755104 | 3,93993386 | 8,15E-05   | 0,00062871 |         |
| ENSGALG000000027058 | 1118,35276 | 0,699526976 | 0,185719   | 3,76658817 | 0,00016549 | 0,00116401 | EMP2    |
| ENSGALG000000020497 | 375,964711 | 0,698148301 | 0,21726001 | 3,21342288 | 0,00131163 | 0,00669232 |         |
| ENSGALG00000004647  | 2581,30282 | 0,697164089 | 0,1609537  | 4,33145725 | 1,48E-05   | 0,0001453  |         |
| ENSGALG000000015181 | 1358,59834 | 0,696928823 | 0,1980876  | 3,51828604 | 0,00043434 | 0,00266338 | GAREM1  |
| ENSGALG000000028945 | 1325,88323 | 0,696399862 | 0,19729376 | 3,52976114 | 0,00041594 | 0,0025729  |         |
| ENSGALG00000007349  | 388,214699 | 0,696333265 | 0,21422064 | 3,25054234 | 0,00115185 | 0,00601091 | RASL12  |
| ENSGALG00000008455  | 4612,74446 | 0,695894902 | 0,1608753  | 4,32567893 | 1,52E-05   | 0,00014811 |         |
| ENSGALG000000010094 | 8338,3892  | 0,695566561 | 0,11023706 | 6,30973457 | 2,80E-10   | 7,11E-09   | B4GALT2 |
| ENSGALG000000010331 | 1143,01041 | 0,693784562 | 0,19974706 | 3,47331558 | 0,00051407 | 0,00306708 | MME     |
| ENSGALG000000010406 | 684,710723 | 0,693540735 | 0,17759525 | 3,9051762  | 9,42E-05   | 0,00071219 | TMEM63C |
| ENSGALG00000001889  | 934,570663 | 0,693259058 | 0,17268521 | 4,01458276 | 5,96E-05   | 0,00047852 | CARD9   |
| ENSGALG00000008651  | 2483,20041 | 0,693028969 | 0,15778512 | 4,39223263 | 1,12E-05   | 0,00011425 | APMAP   |
| ENSGALG000000005103 | 1726,78257 | 0,692645693 | 0,13835836 | 5,00617158 | 5,55E-07   | 7,63E-06   | GDPD1   |
| ENSGALG000000023188 | 975,838184 | 0,692540652 | 0,16000524 | 4,32823725 | 1,50E-05   | 0,00014706 | NANP    |
| ENSGALG00000003636  | 432,590451 | 0,690941222 | 0,20908855 | 3,3045388  | 0,00095133 | 0,00513167 | FBLIM1  |
| ENSGALG000000020575 | 447,180257 | 0,690014438 | 0,22107615 | 3,12116177 | 0,00180139 | 0,00863589 |         |
| ENSGALG000000023655 | 726,630068 | 0,689103212 | 0,1781324  | 3,86848893 | 0,00010951 | 0,00081033 |         |
| ENSGALG000000003122 | 2359,00023 | 0,68839827  | 0,16356115 | 4,20881277 | 2,57E-05   | 0,0002327  | ZFAND2A |
| ENSGALG000000002749 | 1561,25313 | 0,687223145 | 0,13989637 | 4,91237283 | 9,00E-07   | 1,18E-05   |         |
| ENSGALG000000016844 | 1336,96906 | 0,685906484 | 0,15616188 | 4,39227854 | 1,12E-05   | 0,00011425 | RAB20   |
| ENSGALG000000016123 | 816,293249 | 0,685692574 | 0,20965616 | 3,27055776 | 0,00107336 | 0,00566864 |         |
| ENSGALG000000002204 | 670,701965 | 0,684953864 | 0,19602604 | 3,49419842 | 0,00047549 | 0,00287595 | SLC7A4  |
| ENSGALG000000014559 | 1808,90594 | 0,684328525 | 0,1507966  | 4,53808981 | 5,68E-06   | 6,17E-05   |         |
| ENSGALG000000009075 | 1175,32124 | 0,683878573 | 0,15401179 | 4,44042999 | 8,98E-06   | 9,38E-05   | CD99L2  |
| ENSGALG000000010770 | 1614,38779 | 0,683740122 | 0,16437692 | 4,15958702 | 3,19E-05   | 0,00028005 | SCIN    |
| ENSGALG000000009523 | 834,574184 | 0,681144754 | 0,18607441 | 3,66060408 | 0,00025162 | 0,00166626 | CNTN1   |
| ENSGALG000000007251 | 3608,08828 | 0,681060329 | 0,12144401 | 5,60801928 | 2,05E-08   | 3,82E-07   | PCYT2   |
| ENSGALG000000019702 | 11617,3005 | 0,678512546 | 0,13266103 | 5,11463354 | 3,14E-07   | 4,54E-06   |         |
| ENSGALG000000000674 | 418,548479 | 0,67836471  | 0,21301294 | 3,18461735 | 0,00144946 | 0,00725001 | MYO1D   |
| ENSGALG000000020688 | 589,72193  | 0,678030575 | 0,21326458 | 3,17929294 | 0,00147635 | 0,00733594 |         |
| ENSGALG000000026986 | 1312,77213 | 0,67793682  | 0,16864646 | 4,01986992 | 5,82E-05   | 0,00046939 |         |
| ENSGALG00000004240  | 977,710505 | 0,676367039 | 0,17381981 | 3,89119644 | 9,98E-05   | 0,00074827 | ORAI1   |
| ENSGALG000000025764 | 5164,94672 | 0,675250138 | 0,12251808 | 5,51143253 | 3,56E-08   | 6,27E-07   | FKBP10  |
| ENSGALG000000002028 | 1196,67299 | 0,675138088 | 0,19853735 | 3,40055964 | 0,00067248 | 0,00384375 | GPRC5B  |
| ENSGALG000000012583 | 448,709518 | 0,674342421 | 0,20797125 | 3,24247904 | 0,00118495 | 0,00615061 | IDNK    |
| ENSGALG000000016399 | 1323,25053 | 0,673456474 | 0,16094579 | 4,18436848 | 2,86E-05   | 0,00025497 |         |
| ENSGALG000000004472 | 11283,0726 | 0,672299012 | 0,12223168 | 5,50020247 | 3,79E-08   | 6,65E-07   | ASTN1   |
| ENSGALG000000005041 | 1267,24433 | 0,67175632  | 0,1650486  | 4,07005162 | 4,70E-05   | 0,00038926 | TMEM35A |
| ENSGALG000000011896 | 1990,38793 | 0,671754963 | 0,13345151 | 5,03370069 | 4,81E-07   | 6,71E-06   |         |
| ENSGALG000000007038 | 2302,52795 | 0,670533206 | 0,13522368 | 4,95869653 | 7,10E-07   | 9,50E-06   |         |
| ENSGALG000000005069 | 1045,94718 | 0,669583836 | 0,15806848 | 4,23603637 | 2,27E-05   | 0,00020957 |         |
| ENSGALG000000000040 | 692,575173 | 0,669045681 | 0,18677509 | 3,58209261 | 0,00034085 | 0,00217059 |         |
| ENSGALG000000000920 | 727,437453 | 0,668851002 | 0,19789956 | 3,37974989 | 0,00072552 | 0,00410213 | CGN     |
| ENSGALG000000016415 | 1383,10646 | 0,668618298 | 0,18669663 | 3,58130896 | 0,00034188 | 0,00217443 | MAP7D2  |
| ENSGALG000000016617 | 4902,5535  | 0,667497538 | 0,12877865 | 5,18329341 | 2,18E-07   | 3,27E-06   | NCOA1   |
| ENSGALG000000008970 | 735,022626 | 0,666872911 | 0,18064169 | 3,69168889 | 0,00022277 | 0,00150001 |         |

|                     |            |             |            |            |            |            |          |
|---------------------|------------|-------------|------------|------------|------------|------------|----------|
| ENSGALG00000006449  | 910,146444 | 0,666661271 | 0,19615763 | 3,39859966 | 0,00067732 | 0,00386978 |          |
| ENSGALG00000003457  | 3064,26122 | 0,662964808 | 0,14313215 | 4,63183715 | 3,62E-06   | 4,14E-05   | CNP      |
| ENSGALG000000013766 | 661,354996 | 0,662853472 | 0,19762543 | 3,35409001 | 0,00079626 | 0,00443219 |          |
| ENSGALG000000010316 | 7099,3915  | 0,662660688 | 0,11945249 | 5,54748328 | 2,90E-08   | 5,21E-07   | FRAS1    |
| ENSGALG000000002775 | 509,116953 | 0,661278251 | 0,20564659 | 3,21560519 | 0,0013017  | 0,00665263 | FA2H     |
| ENSGALG000000012710 | 1279,29723 | 0,660750331 | 0,15866836 | 4,16434841 | 3,12E-05   | 0,00027501 | NCS1     |
| ENSGALG000000016411 | 1960,74491 | 0,657856223 | 0,15713168 | 4,18665555 | 2,83E-05   | 0,00025274 |          |
| ENSGALG000000006152 | 1208,2078  | 0,657637784 | 0,1593989  | 4,12573602 | 3,70E-05   | 0,00031724 |          |
| ENSGALG000000018967 | 1911,68524 | 0,656123394 | 0,18491847 | 3,54817659 | 0,00038791 | 0,00241489 |          |
| ENSGALG000000016543 | 3236,91171 | 0,654951402 | 0,17013318 | 3,84963956 | 0,00011829 | 0,00086402 | NHS      |
| ENSGALG000000012023 | 986,869481 | 0,654468757 | 0,16148919 | 4,0527095  | 5,06E-05   | 0,00041599 | DACT1    |
| ENSGALG000000003845 | 2106,1901  | 0,653837192 | 0,13713933 | 4,76768555 | 1,86E-06   | 2,26E-05   | MKNK2    |
| ENSGALG000000003589 | 5654,7984  | 0,652278144 | 0,1207315  | 5,40271723 | 6,56E-08   | 1,10E-06   | VTN      |
| ENSGALG000000001426 | 1341,21178 | 0,651807691 | 0,14847266 | 4,39008564 | 1,13E-05   | 0,00011521 |          |
| ENSGALG000000002403 | 2862,69893 | 0,651643976 | 0,15300671 | 4,25892429 | 2,05E-05   | 0,00019195 | ULK1     |
| ENSGALG000000001956 | 2538,00503 | 0,650817237 | 0,17613054 | 3,69508455 | 0,00021981 | 0,00148303 | OLFML3   |
| ENSGALG000000008120 | 6095,80519 | 0,649872522 | 0,12621953 | 5,14874782 | 2,62E-07   | 3,86E-06   | TLE3     |
| ENSGALG000000024104 | 1479,60024 | 0,64969951  | 0,15049285 | 4,31714531 | 1,58E-05   | 0,00015284 |          |
| ENSGALG000000024488 | 3112,83733 | 0,649250333 | 0,1855727  | 3,49863056 | 0,00046765 | 0,00283487 | CD99     |
| ENSGALG000000008763 | 548,608658 | 0,64905793  | 0,2030908  | 3,19590022 | 0,00139395 | 0,00702134 | SSX2IP   |
| ENSGALG000000007848 | 1247,63563 | 0,647083546 | 0,1839624  | 3,51747722 | 0,00043567 | 0,00266711 | PTS      |
| ENSGALG000000010422 | 5513,26975 | 0,646628908 | 0,1246783  | 5,1863789  | 2,14E-07   | 3,22E-06   |          |
| ENSGALG000000010719 | 1138,21283 | 0,646215963 | 0,15983765 | 4,04295223 | 5,28E-05   | 0,00043187 | NEIL3    |
| ENSGALG000000006036 | 6926,72973 | 0,644947298 | 0,14183609 | 4,54713104 | 5,44E-06   | 5,94E-05   |          |
| ENSGALG000000003655 | 1118,25271 | 0,643488267 | 0,18487926 | 3,48058661 | 0,00050032 | 0,00300212 | GAS2     |
| ENSGALG000000000402 | 743,970165 | 0,642116084 | 0,18043203 | 3,55876987 | 0,0003726  | 0,00233882 | LOXL2    |
| ENSGALG000000006947 | 23413,053  | 0,64187784  | 0,11085732 | 5,79012569 | 7,03E-09   | 1,43E-07   | BDH1     |
| ENSGALG000000011335 | 567,87108  | 0,64086738  | 0,205863   | 3,11307701 | 0,00185148 | 0,00882628 |          |
| ENSGALG000000026159 | 2624,11695 | 0,639768169 | 0,13669036 | 4,68041921 | 2,86E-06   | 3,34E-05   | PDLIM7   |
| ENSGALG000000026295 | 3751,17129 | 0,638993968 | 0,12561216 | 5,08703909 | 3,64E-07   | 5,19E-06   | CDR2L    |
| ENSGALG000000000935 | 1038,82432 | 0,638135684 | 0,19518262 | 3,26942888 | 0,00107765 | 0,0056891  |          |
| ENSGALG000000028506 | 1185,60599 | 0,637581477 | 0,16691697 | 3,81975226 | 0,00013359 | 0,00096486 | NHSL2    |
| ENSGALG000000003527 | 1639,11059 | 0,636215476 | 0,14708776 | 4,32541425 | 1,52E-05   | 0,00014816 | ARRDC2   |
| ENSGALG000000028756 | 1081,22564 | 0,636133999 | 0,16633022 | 3,82452444 | 0,00013102 | 0,00094737 |          |
| ENSGALG000000004585 | 1609,34206 | 0,634633954 | 0,16521991 | 3,84114698 | 0,00012246 | 0,00089065 |          |
| ENSGALG000000008057 | 2849,96428 | 0,63255389  | 0,14696671 | 4,30406235 | 1,68E-05   | 0,0001609  | LLGL2    |
| ENSGALG000000011053 | 10065,6567 | 0,630484727 | 0,10769501 | 5,85435431 | 4,79E-09   | 1,01E-07   |          |
| ENSGALG000000008151 | 5862,81637 | 0,629127593 | 0,11865044 | 5,30236208 | 1,14E-07   | 1,81E-06   | WSB2     |
| ENSGALG000000027658 | 594,253982 | 0,628365542 | 0,19060887 | 3,29662282 | 0,00097855 | 0,005237   | TESK1    |
| ENSGALG000000002664 | 1165,54673 | 0,627944771 | 0,15316524 | 4,09978643 | 4,14E-05   | 0,00035053 |          |
| ENSGALG000000029000 | 1142,4251  | 0,627547484 | 0,15842199 | 3,96123969 | 7,46E-05   | 0,00058075 | HYAL3    |
| ENSGALG000000028204 | 8948,35307 | 0,626531339 | 0,12182055 | 5,14306756 | 2,70E-07   | 3,97E-06   |          |
| ENSGALG000000001100 | 796,408366 | 0,626475621 | 0,18020964 | 3,47637138 | 0,00050825 | 0,00303934 |          |
| ENSGALG000000002313 | 2718,417   | 0,626374122 | 0,13464234 | 4,65213353 | 3,29E-06   | 3,79E-05   |          |
| ENSGALG000000026762 | 1809,40153 | 0,625670937 | 0,1367941  | 4,5738152  | 4,79E-06   | 5,34E-05   |          |
| ENSGALG000000008728 | 894,547623 | 0,625207283 | 0,17070647 | 3,66246966 | 0,0002498  | 0,00165578 | PTER     |
| ENSGALG000000011856 | 1033,65184 | 0,624422163 | 0,15756316 | 3,96299593 | 7,40E-05   | 0,00057782 | FMC1     |
| ENSGALG000000007267 | 4451,86283 | 0,623851268 | 0,11702334 | 5,33099856 | 9,77E-08   | 1,57E-06   | MVD      |
| ENSGALG000000014890 | 1413,33309 | 0,620763059 | 0,14626866 | 4,24399216 | 2,20E-05   | 0,00020309 |          |
| ENSGALG000000000426 | 554,757236 | 0,620684473 | 0,19913485 | 3,11690528 | 0,0018276  | 0,00873694 |          |
| ENSGALG000000006114 | 909,882198 | 0,61972927  | 0,17107416 | 3,62257682 | 0,00029168 | 0,0018965  |          |
| ENSGALG000000011900 | 1365,07707 | 0,61861917  | 0,17981254 | 3,44035605 | 0,00058095 | 0,00339761 | NAGA     |
| ENSGALG000000007076 | 2564,35145 | 0,617550884 | 0,14376263 | 4,29562882 | 1,74E-05   | 0,00016632 | CCNY     |
| ENSGALG000000007381 | 1220,44249 | 0,615500074 | 0,15532009 | 3,96278456 | 7,41E-05   | 0,000578   | SERPING1 |
| ENSGALG000000028543 | 1301,49454 | 0,614319385 | 0,1647996  | 3,72767515 | 0,00019325 | 0,00132563 | FGFR4    |
| ENSGALG000000015734 | 903,95178  | 0,61429478  | 0,19839853 | 3,09626685 | 0,00195974 | 0,00928387 |          |
| ENSGALG000000016728 | 5650,40168 | 0,613362339 | 0,11515602 | 5,32635913 | 1,00E-07   | 1,61E-06   | RP2      |
| ENSGALG000000016092 | 954,718038 | 0,611645343 | 0,16439834 | 3,72050802 | 0,00019882 | 0,00135687 |          |
| ENSGALG000000011975 | 2830,82544 | 0,61116717  | 0,12275633 | 4,97870188 | 6,40E-07   | 8,65E-06   |          |
| ENSGALG000000016143 | 5447,09101 | 0,607480677 | 0,17132527 | 3,54577386 | 0,00039146 | 0,0024359  |          |
| ENSGALG000000008512 | 665,497169 | 0,606896507 | 0,19319454 | 3,14137499 | 0,00168157 | 0,00816786 |          |
| ENSGALG000000008272 | 1496,82423 | 0,6063144   | 0,15709843 | 3,8594554  | 0,00011364 | 0,00083633 | TMED3    |

|                    |            |             |            |            |            |            |         |
|--------------------|------------|-------------|------------|------------|------------|------------|---------|
| ENSGALG00000015414 | 1285,1197  | 0,605396806 | 0,18042117 | 3,35546434 | 0,00079232 | 0,00441384 | NSUN3   |
| ENSGALG00000002930 | 5292,49241 | 0,603605896 | 0,13766556 | 4,38458178 | 1,16E-05   | 0,00011781 |         |
| ENSGALG00000005303 | 729,474387 | 0,603106981 | 0,18273634 | 3,30042173 | 0,0009654  | 0,00518701 | CCDC13  |
| ENSGALG00000006742 | 8579,7495  | 0,60288418  | 0,10750963 | 5,60772266 | 2,05E-08   | 3,82E-07   |         |
| ENSGALG00000013964 | 1158,34472 | 0,602864404 | 0,163189   | 3,69427107 | 0,00022052 | 0,00148632 | SPATA18 |
| ENSGALG00000000739 | 566,84692  | 0,602546305 | 0,18860198 | 3,19480372 | 0,00139926 | 0,00704546 |         |
| ENSGALG00000009047 | 3574,12193 | 0,601534497 | 0,13925729 | 4,3195906  | 1,56E-05   | 0,0001517  | YPEL5   |
| ENSGALG00000005628 | 1589,65421 | 0,601333554 | 0,18106388 | 3,3211128  | 0,00089659 | 0,00488488 | COL9A3  |
| ENSGALG00000029021 | 4810,26751 | 0,600451025 | 0,1243158  | 4,83004601 | 1,37E-06   | 1,72E-05   |         |
| ENSGALG00000023435 | 807,96294  | 0,600270173 | 0,18996812 | 3,15984693 | 0,00157852 | 0,0077671  | GATM    |
| ENSGALG00000023876 | 5804,17122 | 0,598475769 | 0,12582855 | 4,75627963 | 1,97E-06   | 2,38E-05   |         |
| ENSGALG00000008475 | 1732,98273 | 0,598095279 | 0,145561   | 4,10889791 | 3,98E-05   | 0,00033935 | ARRDC1  |
| ENSGALG00000013167 | 14635,2035 | 0,597899753 | 0,11791074 | 5,07078291 | 3,96E-07   | 5,61E-06   | SDHA    |
| ENSGALG00000007801 | 1966,88294 | 0,597201094 | 0,14607757 | 4,08824628 | 4,35E-05   | 0,00036327 |         |
| ENSGALG00000027450 | 1958,10116 | 0,596865465 | 0,13602137 | 4,3880272  | 1,14E-05   | 0,00011605 |         |
| ENSGALG00000002818 | 12498,9505 | 0,595523293 | 0,12527412 | 4,75376167 | 2,00E-06   | 2,41E-05   |         |
| ENSGALG00000008285 | 2205,39659 | 0,594659875 | 0,13357092 | 4,4520161  | 8,51E-06   | 8,94E-05   | NAPEPLD |
| ENSGALG00000026756 | 608,701473 | 0,593058479 | 0,18596131 | 3,1891498  | 0,00142692 | 0,00716353 |         |
| ENSGALG00000011145 | 3513,15874 | 0,5922185   | 0,11951587 | 4,95514543 | 7,23E-07   | 9,63E-06   | TRIL    |
| ENSGALG00000026180 | 4122,30438 | 0,591162305 | 0,14254212 | 4,14728156 | 3,36E-05   | 0,00029326 |         |
| ENSGALG00000005999 | 5083,90869 | 0,591144605 | 0,12187871 | 4,85026945 | 1,23E-06   | 1,57E-05   | ABTB1   |
| ENSGALG00000013436 | 9895,67369 | 0,590008237 | 0,1280495  | 4,60765752 | 4,07E-06   | 4,58E-05   |         |
| ENSGALG00000013742 | 6102,59896 | 0,589905166 | 0,14728573 | 4,0051753  | 6,20E-05   | 0,00049428 | EZR     |
| ENSGALG00000025745 | 2020,21836 | 0,589609597 | 0,16557075 | 3,56107338 | 0,00036934 | 0,0023216  |         |
| ENSGALG00000026081 | 3861,36621 | 0,588777417 | 0,1223416  | 4,81256939 | 1,49E-06   | 1,86E-05   | RBM38   |
| ENSGALG00000000464 | 6973,12042 | 0,587838297 | 0,11000425 | 5,34377783 | 9,10E-08   | 1,48E-06   |         |
| ENSGALG00000005102 | 2254,46112 | 0,58732124  | 0,16766068 | 3,50303501 | 0,00045999 | 0,00279338 | CDH4    |
| ENSGALG00000016594 | 1080,56836 | 0,58674351  | 0,17030861 | 3,44517825 | 0,00057068 | 0,00334619 |         |
| ENSGALG00000010934 | 813,601759 | 0,586239182 | 0,17064205 | 3,43549068 | 0,00059148 | 0,00345031 |         |
| ENSGALG00000025822 | 1186,62395 | 0,586217768 | 0,19001165 | 3,08516751 | 0,00203438 | 0,00958078 | CYP1B1  |
| ENSGALG00000017558 | 835,379673 | 0,585776262 | 0,17286518 | 3,38863076 | 0,00070243 | 0,00398832 |         |
| ENSGALG00000002169 | 5307,04919 | 0,58477373  | 0,13930071 | 4,19792355 | 2,69E-05   | 0,0002424  | PLEKHB2 |
| ENSGALG00000025738 | 2313,93547 | 0,584187633 | 0,13782283 | 4,23868547 | 2,25E-05   | 0,00020753 |         |
| ENSGALG00000015938 | 2888,98507 | 0,583396297 | 0,14475468 | 4,03024131 | 5,57E-05   | 0,00045237 |         |
| ENSGALG00000001574 | 3769,69235 | 0,583342794 | 0,12963845 | 4,49976697 | 6,80E-06   | 7,24E-05   |         |
| ENSGALG00000014242 | 1647,30473 | 0,583190799 | 0,15565274 | 3,74674285 | 0,00017915 | 0,0012457  |         |
| ENSGALG00000008999 | 3276,84717 | 0,583129446 | 0,15516573 | 3,75810727 | 0,0001712  | 0,00119904 | AFAP1L2 |
| ENSGALG00000010706 | 6618,96251 | 0,582943162 | 0,11294938 | 5,16110101 | 2,46E-07   | 3,64E-06   |         |
| ENSGALG00000004844 | 6201,27995 | 0,581688828 | 0,14767508 | 3,93897768 | 8,18E-05   | 0,00063051 |         |
| ENSGALG00000009604 | 5450,24379 | 0,581479374 | 0,13237918 | 4,39252905 | 1,12E-05   | 0,00011425 | DBX2    |
| ENSGALG00000001446 | 6585,16039 | 0,581431635 | 0,15010679 | 3,8734532  | 0,0001073  | 0,00079659 |         |
| ENSGALG00000023768 | 4728,02752 | 0,58136874  | 0,11646418 | 4,99182452 | 5,98E-07   | 8,14E-06   |         |
| ENSGALG00000002707 | 937,598421 | 0,58133458  | 0,18027574 | 3,22469665 | 0,00126106 | 0,00647656 | CHRNA2  |
| ENSGALG00000029020 | 1577,39916 | 0,581217481 | 0,17198927 | 3,37938213 | 0,00072649 | 0,00410592 | PLPP4   |
| ENSGALG00000028478 | 1030,91271 | 0,580829913 | 0,18242777 | 3,18388976 | 0,0014531  | 0,00725779 |         |
| ENSGALG00000007531 | 904,342369 | 0,57752222  | 0,17317755 | 3,33485613 | 0,00085344 | 0,00468152 | ZFYVE27 |
| ENSGALG00000006054 | 759,821789 | 0,576882549 | 0,18206756 | 3,1685082  | 0,00153223 | 0,00756944 | CALCA   |
| ENSGALG00000022926 | 4686,66572 | 0,576442566 | 0,12615332 | 4,56938097 | 4,89E-06   | 5,45E-05   | GPR162  |
| ENSGALG00000013185 | 3965,04447 | 0,575558846 | 0,14856351 | 3,87416023 | 0,00010699 | 0,00079645 |         |
| ENSGALG00000000869 | 855,333756 | 0,574690811 | 0,17351236 | 3,31210309 | 0,00092597 | 0,00502477 |         |
| ENSGALG00000006885 | 6383,54265 | 0,574664846 | 0,12640826 | 4,54610186 | 5,46E-06   | 5,96E-05   |         |
| ENSGALG00000015136 | 2417,80657 | 0,573614313 | 0,16092955 | 3,56438149 | 0,00036472 | 0,0022957  | ILDR1   |
| ENSGALG00000015744 | 3529,13316 | 0,573305804 | 0,12554323 | 4,56660089 | 4,96E-06   | 5,50E-05   |         |
| ENSGALG00000001489 | 8334,32619 | 0,572451499 | 0,12945603 | 4,42197621 | 9,78E-06   | 0,000101   | SSU72   |
| ENSGALG00000014911 | 1071,97212 | 0,572338387 | 0,15722716 | 3,6402005  | 0,00027243 | 0,00178235 | ARL15   |
| ENSGALG00000015351 | 2719,2778  | 0,572206068 | 0,17042313 | 3,35756104 | 0,00078633 | 0,00439308 | CBLB    |
| ENSGALG00000025818 | 8546,90555 | 0,571475138 | 0,10995302 | 5,19744834 | 2,02E-07   | 3,06E-06   |         |
| ENSGALG00000005549 | 1034,75448 | 0,569387138 | 0,15615315 | 3,64633795 | 0,000266   | 0,0017479  | CUEDC1  |
| ENSGALG00000024153 | 1062,25024 | 0,56872295  | 0,17097205 | 3,326409   | 0,00087973 | 0,00480831 |         |
| ENSGALG00000000186 | 787,093258 | 0,568415238 | 0,17712851 | 3,20905553 | 0,00133172 | 0,00677301 | MTCH1   |
| ENSGALG00000001146 | 1103,97969 | 0,568231367 | 0,16866857 | 3,36892268 | 0,00075463 | 0,00423331 | UBXN6   |
| ENSGALG00000012788 | 1309,52475 | 0,567748724 | 0,16133631 | 3,51903868 | 0,00043311 | 0,00265983 |         |



|                      |            |             |            |            |            |            |          |
|----------------------|------------|-------------|------------|------------|------------|------------|----------|
| ENSGALG00000006873   | 2079,27658 | 0,565449117 | 0,13107514 | 4,3139312  | 1,60E-05   | 0,00015464 | PHRF1    |
| ENSGALG00000007093   | 1910,94783 | 0,563647311 | 0,15313163 | 3,68080257 | 0,0002325  | 0,00155583 | CYTH1    |
| ENSGALG00000002778   | 10757,9738 | 0,563240809 | 0,10999952 | 5,12039322 | 3,05E-07   | 4,42E-06   |          |
| ENSGALG000000028605  | 2035,83961 | 0,561167945 | 0,15780973 | 3,55597819 | 0,00037658 | 0,00235619 |          |
| ENSGALG00000002681   | 1896,59526 | 0,559637304 | 0,14922639 | 3,75025697 | 0,00017665 | 0,00123277 |          |
| ENSGALG000000016152  | 7208,33853 | 0,558712272 | 0,12592253 | 4,43695234 | 9,12E-06   | 9,51E-05   |          |
| ENSGALG000000010307  | 1309,92001 | 0,558082008 | 0,16022503 | 3,48311375 | 0,00049562 | 0,00297918 | ACYP1    |
| ENSGALG000000010614  | 5022,37444 | 0,557460992 | 0,12556393 | 4,4396588  | 9,01E-06   | 9,41E-05   | SLC25A4  |
| ENSGALG000000001682  | 1516,35079 | 0,557286636 | 0,15010501 | 3,71264502 | 0,0002051  | 0,00139485 | FBXL20   |
| ENSGALG000000001238  | 3616,01439 | 0,556401234 | 0,12857642 | 4,32739711 | 1,51E-05   | 0,00014747 | STX8     |
| ENSGALG000000002286  | 73998,0221 | 0,555324016 | 0,11102707 | 5,00169946 | 5,68E-07   | 7,79E-06   |          |
| ENSGALG000000025787  | 2442,89077 | 0,554206894 | 0,13003561 | 4,2619625  | 2,03E-05   | 0,00018949 |          |
| ENSGALG000000004849  | 4017,82732 | 0,553445556 | 0,11594023 | 4,77354206 | 1,81E-06   | 2,21E-05   | WSCD2    |
| ENSGALG000000001766  | 1421,20567 | 0,552758547 | 0,17371857 | 3,1819197  | 0,00146302 | 0,0072892  |          |
| ENSGALG000000010982  | 4422,55083 | 0,55035484  | 0,13935769 | 3,94922475 | 7,84E-05   | 0,00060618 |          |
| ENSGALG000000000316  | 1699,55338 | 0,549437781 | 0,1376171  | 3,99251106 | 6,54E-05   | 0,00051769 |          |
| ENSGALG000000027194  | 1293,57158 | 0,548094206 | 0,15171291 | 3,61270652 | 0,00030302 | 0,00195897 |          |
| ENSGALG0000000016166 | 3894,34548 | 0,547970517 | 0,13938637 | 3,93130636 | 8,45E-05   | 0,0006489  |          |
| ENSGALG000000006663  | 9717,81848 | 0,547489923 | 0,11710931 | 4,67503318 | 2,94E-06   | 3,41E-05   | ARHGEF12 |
| ENSGALG000000001966  | 2313,19503 | 0,545673399 | 0,14563945 | 3,74674179 | 0,00017915 | 0,0012457  |          |
| ENSGALG000000001864  | 1163,99304 | 0,545343287 | 0,16861317 | 3,23428649 | 0,00121947 | 0,00630098 | C9orf72  |
| ENSGALG000000006598  | 2327,66634 | 0,544504824 | 0,13759012 | 3,95744117 | 7,58E-05   | 0,00058794 | SORL1    |
| ENSGALG0000000015107 | 1737,16005 | 0,542439326 | 0,13565302 | 3,99872658 | 6,37E-05   | 0,00050646 | PIP5K1B  |
| ENSGALG000000008860  | 2251,91448 | 0,541261109 | 0,1571898  | 3,44336028 | 0,00057453 | 0,00336442 | LONRF3   |
| ENSGALG000000005315  | 1118,21521 | 0,540760838 | 0,15986155 | 3,38268231 | 0,00071782 | 0,00406365 | RPUSD1   |
| ENSGALG000000004033  | 1001,88457 | 0,540669975 | 0,16471038 | 3,28254945 | 0,00102873 | 0,00546475 | GALNT10  |
| ENSGALG000000022713  | 4245,74271 | 0,539793648 | 0,1498998  | 3,60102975 | 0,00031696 | 0,00203557 |          |
| ENSGALG000000025800  | 976,781593 | 0,538353026 | 0,16267943 | 3,30928757 | 0,00093534 | 0,00506145 |          |
| ENSGALG000000028513  | 5510,29846 | 0,53711532  | 0,11230935 | 4,7824632  | 1,73E-06   | 2,12E-05   |          |
| ENSGALG0000000015437 | 3953,66098 | 0,536831128 | 0,13281019 | 4,04209288 | 5,30E-05   | 0,00043291 |          |
| ENSGALG000000007389  | 2084,84126 | 0,53455468  | 0,13272068 | 4,02766676 | 5,63E-05   | 0,00045653 | ANKRD40  |
| ENSGALG0000000016167 | 2827,43941 | 0,530005093 | 0,12787412 | 4,14474083 | 3,40E-05   | 0,00029577 |          |
| ENSGALG000000023189  | 809,880728 | 0,529094048 | 0,16742381 | 3,16020792 | 0,00157657 | 0,00776028 | UMAD1    |
| ENSGALG000000009433  | 12972,2996 | 0,528259009 | 0,13672663 | 3,8636145  | 0,00011172 | 0,00082355 | BAG3     |
| ENSGALG0000000015372 | 6118,12247 | 0,526646329 | 0,10985979 | 4,79380423 | 1,64E-06   | 2,03E-05   | ATP5I    |
| ENSGALG000000024346  | 1302,16175 | 0,525612903 | 0,1486838  | 3,53510544 | 0,00040761 | 0,00252716 |          |
| ENSGALG0000000015306 | 3107,54178 | 0,524586766 | 0,14678095 | 3,57394315 | 0,00035165 | 0,00222785 | OSTM1    |
| ENSGALG000000026545  | 5534,24488 | 0,524540794 | 0,12628499 | 4,15362728 | 3,27E-05   | 0,00028597 |          |
| ENSGALG000000002777  | 12410,374  | 0,524514209 | 0,1049816  | 4,99624903 | 5,85E-07   | 7,98E-06   |          |
| ENSGALG0000000015326 | 10708,8753 | 0,524363909 | 0,11790787 | 4,44723436 | 8,70E-06   | 9,12E-05   | CLTA     |
| ENSGALG0000000014846 | 1408,26305 | 0,524315684 | 0,14757312 | 3,55292141 | 0,00038098 | 0,00237937 |          |
| ENSGALG0000000011945 | 1101,05327 | 0,524157211 | 0,16753074 | 3,12872254 | 0,00175568 | 0,00846159 |          |
| ENSGALG000000006901  | 2767,40121 | 0,523326668 | 0,12428389 | 4,21073609 | 2,55E-05   | 0,00023088 | AATK     |
| ENSGALG000000026113  | 4499,07114 | 0,523056553 | 0,14658052 | 3,56839051 | 0,00035918 | 0,0022661  |          |
| ENSGALG000000000433  | 145504,42  | 0,523011809 | 0,10274265 | 5,09050316 | 3,57E-07   | 5,11E-06   |          |
| ENSGALG0000000016886 | 6214,42839 | 0,522545779 | 0,11023413 | 4,7403267  | 2,13E-06   | 2,56E-05   | FARP1    |
| ENSGALG000000008367  | 12605,915  | 0,522250337 | 0,11987187 | 4,35673805 | 1,32E-05   | 0,00013139 | MDK      |
| ENSGALG000000008911  | 1167,8871  | 0,520705327 | 0,16373625 | 3,18014692 | 0,001472   | 0,00732237 | RNF208   |
| ENSGALG000000023338  | 5372,42979 | 0,520605081 | 0,12794507 | 4,06897339 | 4,72E-05   | 0,00039083 | CBX2     |
| ENSGALG000000001944  | 1567,50719 | 0,519218499 | 0,15022432 | 3,45628783 | 0,00054767 | 0,00323494 | TBC1D2   |
| ENSGALG000000000059  | 125389,821 | 0,519152064 | 0,12052089 | 4,30756896 | 1,65E-05   | 0,00015871 | TUBB3    |
| ENSGALG000000005346  | 2351,81671 | 0,518505546 | 0,12959656 | 4,00092074 | 6,31E-05   | 0,00050208 | PPIC     |
| ENSGALG000000028033  | 2016,60758 | 0,517359519 | 0,13377729 | 3,86731945 | 0,00011004 | 0,0008129  |          |
| ENSGALG0000000013024 | 1376,29845 | 0,516485359 | 0,15574832 | 3,31615365 | 0,00091266 | 0,00496041 |          |
| ENSGALG000000028567  | 2485,76766 | 0,515072598 | 0,12787307 | 4,02799904 | 5,63E-05   | 0,00045616 | MYL9     |
| ENSGALG000000001998  | 1765,57571 | 0,514536405 | 0,13830499 | 3,72030241 | 0,00019898 | 0,00135687 | R3HDM4   |
| ENSGALG0000000012089 | 5360,59071 | 0,513995299 | 0,12096528 | 4,24911439 | 2,15E-05   | 0,00019918 | C14orf37 |
| ENSGALG0000000013708 | 5397,09415 | 0,513478256 | 0,13150987 | 3,90448458 | 9,44E-05   | 0,00071344 | CYB5A    |
| ENSGALG000000029159  | 2974,1732  | 0,51305649  | 0,12916503 | 3,97210068 | 7,12E-05   | 0,00056002 |          |
| ENSGALG000000005901  | 2799,23507 | 0,510684045 | 0,13243521 | 3,85610467 | 0,00011521 | 0,00084513 | PCMTD2   |
| ENSGALG000000023786  | 1008,22899 | 0,510469642 | 0,16220256 | 3,14711206 | 0,00164892 | 0,00803796 |          |
| ENSGALG0000000017053 | 1433,26653 | 0,50974214  | 0,14651068 | 3,47921488 | 0,00050289 | 0,00301355 | SPG20    |

|                    |            |             |            |            |            |            |                  |
|--------------------|------------|-------------|------------|------------|------------|------------|------------------|
| ENSGALG00000004741 | 5108,39092 | 0,509578858 | 0,14467631 | 3,52219976 | 0,00042798 | 0,00263783 | EPHB2            |
| ENSGALG00000012644 | 1843,51714 | 0,509005651 | 0,13724043 | 3,70886091 | 0,00020819 | 0,00141445 |                  |
| ENSGALG00000029036 | 2011,06708 | 0,506773529 | 0,16255236 | 3,11760184 | 0,00182329 | 0,00871938 |                  |
| ENSGALG00000011324 | 77589,574  | 0,50624037  | 0,10393882 | 4,8705612  | 1,11E-06   | 1,44E-05   |                  |
| ENSGALG00000005757 | 2287,1727  | 0,505955901 | 0,14803896 | 3,41772137 | 0,00063148 | 0,00363995 | IRF8             |
| ENSGALG00000012670 | 2710,27627 | 0,505329169 | 0,13956275 | 3,62080263 | 0,00029369 | 0,00190591 |                  |
| ENSGALG00000028145 | 4237,96065 | 0,505320547 | 0,15549944 | 3,24966153 | 0,00115542 | 0,00602451 |                  |
| ENSGALG00000027891 | 10377,4455 | 0,504324315 | 0,10846652 | 4,64958504 | 3,33E-06   | 3,83E-05   |                  |
| ENSGALG00000024295 | 3217,43815 | 0,504249612 | 0,13242093 | 3,80792978 | 0,00014014 | 0,00100577 |                  |
| ENSGALG00000008631 | 3955,10092 | 0,503418102 | 0,13183167 | 3,81864307 | 0,00013419 | 0,00096819 | TYRO3            |
| ENSGALG00000005811 | 1644,05046 | 0,503226947 | 0,1577089  | 3,19085955 | 0,0014185  | 0,00712916 |                  |
| ENSGALG00000025977 | 2572,61094 | 0,502103804 | 0,12961035 | 3,87394827 | 0,00010709 | 0,00079659 | GADD45A          |
| ENSGALG00000024398 | 21096,2288 | 0,500531072 | 0,11622841 | 4,30644352 | 1,66E-05   | 0,0001594  | RPS28            |
| ENSGALG00000004851 | 3943,15715 | 0,500191453 | 0,14446169 | 3,4624504  | 0,00053528 | 0,00317415 |                  |
| ENSGALG00000008341 | 3732,2674  | 0,499807137 | 0,12743693 | 3,92199613 | 8,78E-05   | 0,00067247 | FURIN            |
| ENSGALG00000011326 | 2703,92213 | 0,4983963   | 0,1426307  | 3,49431285 | 0,00047528 | 0,00287595 | STK16            |
| ENSGALG00000000842 | 2625,68946 | 0,49824929  | 0,14971545 | 3,3279751  | 0,0008748  | 0,0047852  |                  |
| ENSGALG00000007370 | 4047,93897 | 0,4969378   | 0,12075859 | 4,11513402 | 3,87E-05   | 0,00033124 | CLP1             |
| ENSGALG00000012947 | 2224,14952 | 0,495800698 | 0,13770491 | 3,60045778 | 0,00031766 | 0,00203909 |                  |
| ENSGALG00000013067 | 8815,63453 | 0,494753671 | 0,11635485 | 4,25211024 | 2,12E-05   | 0,00019721 |                  |
| ENSGALG00000000527 | 6471,78085 | 0,494652161 | 0,11959043 | 4,13621848 | 3,53E-05   | 0,00030619 |                  |
| ENSGALG00000012540 | 1788,92176 | 0,494557337 | 0,13808033 | 3,58166386 | 0,00034141 | 0,00217314 | RBFOX2           |
| ENSGALG00000011778 | 2592,19321 | 0,494085012 | 0,14681864 | 3,36527439 | 0,00076468 | 0,00428615 |                  |
| ENSGALG00000027824 | 1654,69459 | 0,493225579 | 0,14677677 | 3,36037904 | 0,00077836 | 0,00435387 |                  |
| ENSGALG00000005897 | 4766,71418 | 0,493064333 | 0,12620964 | 3,90670892 | 9,36E-05   | 0,00070927 | HMCES            |
| ENSGALG00000012816 | 2261,40613 | 0,492973169 | 0,15659783 | 3,14802046 | 0,0016438  | 0,00802229 | SLC22A23         |
| ENSGALG00000005071 | 6694,01614 | 0,492854493 | 0,11371723 | 4,33403516 | 1,46E-05   | 0,00014402 | MPP1             |
| ENSGALG00000000336 | 3779,81285 | 0,492268059 | 0,13944285 | 3,53024962 | 0,00041517 | 0,00257049 | PP1M M21 subunit |
| ENSGALG00000004902 | 4281,00793 | 0,491426093 | 0,11754092 | 4,18089353 | 2,90E-05   | 0,00025805 | TOM1L2           |
| ENSGALG00000011894 | 1400,22178 | 0,491394089 | 0,14545816 | 3,37825034 | 0,00072949 | 0,00411775 |                  |
| ENSGALG00000017076 | 6428,3314  | 0,490620681 | 0,14677761 | 3,34261258 | 0,00082994 | 0,00457043 | B3GLCT           |
| ENSGALG00000008409 | 5336,4487  | 0,490103959 | 0,14311325 | 3,42458839 | 0,00061573 | 0,00357339 |                  |
| ENSGALG00000011531 | 2214,44297 | 0,486736013 | 0,15147264 | 3,2133593  | 0,00131192 | 0,00669232 | APAF1            |
| ENSGALG00000006915 | 1392,13905 | 0,485309324 | 0,15555376 | 3,11988167 | 0,00180924 | 0,00866613 |                  |
| ENSGALG00000000947 | 2256,10973 | 0,482847185 | 0,14942146 | 3,23144465 | 0,00123166 | 0,00635192 |                  |
| ENSGALG00000014581 | 2314,87998 | 0,482286067 | 0,13822045 | 3,48925269 | 0,00048437 | 0,0029219  | BORCS8           |
| ENSGALG00000011738 | 6621,78437 | 0,482221251 | 0,11823294 | 4,07856946 | 4,53E-05   | 0,00037711 | ARHGDIB          |
| ENSGALG00000027688 | 6057,20574 | 0,481915396 | 0,11816406 | 4,07835855 | 4,54E-05   | 0,00037722 | NDUFB4           |
| ENSGALG00000005713 | 4508,08916 | 0,480930735 | 0,11431181 | 4,2071834  | 2,59E-05   | 0,00023392 | NCKIPSD          |
| ENSGALG00000003405 | 5095,98918 | 0,480657067 | 0,11244145 | 4,27473194 | 1,91E-05   | 0,00018043 | BSDC1            |
| ENSGALG00000002033 | 6624,42072 | 0,480537464 | 0,11110056 | 4,32524788 | 1,52E-05   | 0,00014817 | NDUFB6           |
| ENSGALG00000029135 | 7403,52828 | 0,479980361 | 0,12965053 | 3,70210873 | 0,00021381 | 0,00144758 | GAS41            |
| ENSGALG00000011436 | 3916,77111 | 0,477975314 | 0,1192676  | 4,00758713 | 6,13E-05   | 0,00049041 | TMBIM1           |
| ENSGALG00000003466 | 4818,27592 | 0,477695903 | 0,13420724 | 3,55939007 | 0,00037172 | 0,00233545 | AKR1B1L          |
| ENSGALG00000001606 | 1726,36227 | 0,477443775 | 0,14690617 | 3,2499912  | 0,00115409 | 0,00602026 | INPP5B           |
| ENSGALG00000000785 | 1523,67138 | 0,476932316 | 0,14689834 | 3,24668282 | 0,00116758 | 0,00607411 | HYAL1            |
| ENSGALG00000014765 | 2914,68173 | 0,476665637 | 0,12457546 | 3,82632052 | 0,00013007 | 0,00094149 | TRIM23           |
| ENSGALG00000000943 | 4846,50588 | 0,473716041 | 0,11278203 | 4,20027936 | 2,67E-05   | 0,00024021 | WDTC1            |
| ENSGALG00000006588 | 1949,86566 | 0,473632802 | 0,13867563 | 3,41540052 | 0,00063688 | 0,00366533 | LRRC75B          |
| ENSGALG00000023157 | 3625,87384 | 0,472554642 | 0,14223538 | 3,32234238 | 0,00089265 | 0,00487307 | REEP5            |
| ENSGALG00000006702 | 2572,80575 | 0,471728545 | 0,1314835  | 3,58773935 | 0,00033356 | 0,00213052 | MFGE8            |
| ENSGALG00000003359 | 6429,54572 | 0,469661247 | 0,12003738 | 3,91262507 | 9,13E-05   | 0,00069482 |                  |
| ENSGALG00000027377 | 1588,86326 | 0,469161575 | 0,14290687 | 3,28298835 | 0,00102713 | 0,00545838 |                  |
| ENSGALG00000013511 | 6097,6262  | 0,469095656 | 0,12052644 | 3,89205602 | 9,94E-05   | 0,00074604 | ANKRA2           |
| ENSGALG00000003348 | 1706,40697 | 0,468370054 | 0,13812202 | 3,39098761 | 0,00069641 | 0,0039639  |                  |
| ENSGALG00000028342 | 3684,92319 | 0,4672884   | 0,14052674 | 3,32526324 | 0,00088335 | 0,00482617 |                  |
| ENSGALG00000004581 | 7502,73386 | 0,466855623 | 0,11693534 | 3,99242555 | 6,54E-05   | 0,00051769 | NDST1            |
| ENSGALG00000007238 | 3294,46471 | 0,466556765 | 0,1396865  | 3,34002762 | 0,0008377  | 0,0046082  |                  |
| ENSGALG00000001556 | 1997,40951 | 0,466292104 | 0,13625952 | 3,42208821 | 0,00062142 | 0,00359569 |                  |
| ENSGALG00000009655 | 1343,41122 | 0,465196113 | 0,14630894 | 3,17954671 | 0,00147506 | 0,0073322  | AADAT            |
| ENSGALG00000002485 | 4126,42787 | 0,464623616 | 0,12758859 | 3,64157666 | 0,00027097 | 0,00177456 | PHKG1            |

|                     |            |              |            |            |            |            |          |
|---------------------|------------|--------------|------------|------------|------------|------------|----------|
| ENSGALG00000011474  | 2398,5188  | 0,463345487  | 0,1386209  | 3,34253707 | 0,00083016 | 0,00457043 |          |
| ENSGALG00000013698  | 1914,38769 | 0,462883571  | 0,13997841 | 3,30682108 | 0,00094361 | 0,00510015 |          |
| ENSGALG00000007582  | 9089,3986  | 0,462276159  | 0,11185396 | 4,13285464 | 3,58E-05   | 0,00030983 | DPYSL3   |
| ENSGALG00000003976  | 1632,25763 | 0,461042882  | 0,14423767 | 3,19641107 | 0,00139149 | 0,0070167  | BCORL1   |
| ENSGALG000000024391 | 9415,82069 | 0,460947942  | 0,11472094 | 4,01799317 | 5,87E-05   | 0,00047231 | CACTIN   |
| ENSGALG000000024034 | 3571,45047 | 0,460548751  | 0,12312106 | 3,74061704 | 0,00018357 | 0,00127126 | PI4KB    |
| ENSGALG00000014226  | 4001,88511 | 0,460133597  | 0,13949225 | 3,29863207 | 0,00097157 | 0,00520949 |          |
| ENSGALG000000022980 | 7902,73972 | 0,459059074  | 0,1123607  | 4,08558383 | 4,40E-05   | 0,00036679 | CDKN1B   |
| ENSGALG00000014324  | 2616,41443 | 0,458208088  | 0,14844789 | 3,08665942 | 0,00202419 | 0,00953942 |          |
| ENSGALG00000001881  | 2571,72261 | 0,456046301  | 0,14749617 | 3,09191952 | 0,00198867 | 0,00938825 |          |
| ENSGALG00000000921  | 4858,40124 | 0,454646053  | 0,11600766 | 3,9191038  | 8,89E-05   | 0,00067906 |          |
| ENSGALG00000004537  | 5387,82075 | 0,454616982  | 0,11547716 | 3,93685619 | 8,26E-05   | 0,00063539 |          |
| ENSGALG00000016870  | 5615,99638 | 0,454001604  | 0,11901986 | 3,81450277 | 0,00013646 | 0,00098404 | TMTC4    |
| ENSGALG000000027963 | 10511,1952 | 0,451771641  | 0,1053151  | 4,28971367 | 1,79E-05   | 0,00016974 | COX7C    |
| ENSGALG00000009054  | 1742,52432 | 0,451368563  | 0,14445222 | 3,12469106 | 0,00177992 | 0,00855102 |          |
| ENSGALG00000017351  | 2392,614   | 0,45115395   | 0,12979024 | 3,47602367 | 0,00050891 | 0,0030416  |          |
| ENSGALG00000007286  | 2211,13478 | 0,450759437  | 0,14338367 | 3,14372922 | 0,0016681  | 0,00811112 | SIRT7    |
| ENSGALG00000001376  | 9938,31883 | 0,45012042   | 0,10543845 | 4,26903467 | 1,96E-05   | 0,00018459 | ARID3B   |
| ENSGALG00000017126  | 2105,45067 | 0,449836372  | 0,14456606 | 3,11163202 | 0,00186056 | 0,00886339 |          |
| ENSGALG00000004353  | 9460,54723 | 0,448918917  | 0,11266612 | 3,98450692 | 6,76E-05   | 0,00053309 | TBCA     |
| ENSGALG00000015780  | 22777,7944 | 0,447991765  | 0,11059391 | 4,05078157 | 5,10E-05   | 0,00041817 | PNRC1    |
| ENSGALG00000012218  | 3810,36969 | 0,44776649   | 0,1283039  | 3,48988984 | 0,00048322 | 0,00291753 | CBY1     |
| ENSGALG00000008274  | 1660,02758 | 0,446767639  | 0,14203363 | 3,14550613 | 0,001658   | 0,00807066 | CRBN     |
| ENSGALG00000005608  | 3810,24681 | 0,44662731   | 0,13008707 | 3,43329509 | 0,00059629 | 0,00347391 | SLC9A3R2 |
| ENSGALG00000017329  | 3706,96729 | 0,44555284   | 0,13631333 | 3,26859342 | 0,00108083 | 0,00570371 | FCHSD2   |
| ENSGALG00000015987  | 4807,19259 | 0,445391941  | 0,12455693 | 3,57581017 | 0,00034914 | 0,00221571 |          |
| ENSGALG00000000067  | 2534,63139 | 0,444870546  | 0,12860379 | 3,45923359 | 0,00054171 | 0,00320811 | SPR      |
| ENSGALG00000011921  | 3797,77855 | 0,444716768  | 0,14148109 | 3,14329478 | 0,00167058 | 0,00812027 | DHRS7    |
| ENSGALG000000027337 | 6395,16083 | 0,441351335  | 0,11482343 | 3,84373949 | 0,00012117 | 0,00088176 |          |
| ENSGALG00000004907  | 2377,26928 | 0,441232207  | 0,13371969 | 3,29968027 | 0,00096795 | 0,00519663 | KCTD15   |
| ENSGALG00000017096  | 2040,45459 | 0,440278375  | 0,13379312 | 3,29073997 | 0,00099924 | 0,00532681 |          |
| ENSGALG00000012043  | 13548,0358 | 0,439717314  | 0,10426627 | 4,21725362 | 2,47E-05   | 0,00022551 |          |
| ENSGALG00000012265  | 3656,88094 | 0,439419657  | 0,1289098  | 3,40873745 | 0,00065264 | 0,00373978 | MICALL1  |
| ENSGALG00000002986  | 2686,67203 | 0,439006087  | 0,12512502 | 3,50853962 | 0,00045057 | 0,00274477 |          |
| ENSGALG00000005820  | 8527,7428  | 0,438136271  | 0,11284846 | 3,88251872 | 0,00010338 | 0,00077336 | RNF130   |
| ENSGALG000000026116 | 1987,2825  | 0,437155594  | 0,13561904 | 3,22340863 | 0,00126675 | 0,00649596 |          |
| ENSGALG00000013091  | 2461,62995 | 0,436802578  | 0,1334788  | 3,27244902 | 0,0010662  | 0,00564179 |          |
| ENSGALG00000008444  | 16562,7434 | 0,436671101  | 0,11266409 | 3,87586767 | 0,00010625 | 0,00079262 | TUBAL3   |
| ENSGALG00000012821  | 60743,3322 | 0,436526282  | 0,11022595 | 3,96028605 | 7,49E-05   | 0,00058241 |          |
| ENSGALG00000006399  | 2888,16792 | 0,435019992  | 0,12865618 | 3,38125997 | 0,00072154 | 0,00408283 | MESDC1   |
| ENSGALG00000010134  | 2529,19577 | 0,434710794  | 0,12612196 | 3,44674955 | 0,00056737 | 0,00333397 | ZFAND3   |
| ENSGALG00000016059  | 2071,29674 | 0,434358409  | 0,13768426 | 3,15474273 | 0,0016064  | 0,0078758  | ETS2     |
| ENSGALG000000021365 | 7390,77997 | 0,432965219  | 0,11720328 | 3,69413922 | 0,00022063 | 0,00148635 | DCTN3    |
| ENSGALG00000003447  | 2587,36522 | 0,432921053  | 0,13816024 | 3,1334707  | 0,00172752 | 0,00835531 |          |
| ENSGALG00000004725  | 7054,54942 | 0,431307897  | 0,12989304 | 3,32048515 | 0,00089861 | 0,00489384 |          |
| ENSGALG000000000551 | 4770,60214 | 0,428841133  | 0,11757382 | 3,64742036 | 0,00026489 | 0,00174139 | C6orf89  |
| ENSGALG000000023612 | 4284,86865 | 0,427551312  | 0,12223705 | 3,4977227  | 0,00046925 | 0,00284327 | LZTS2    |
| ENSGALG00000010838  | 5580,71709 | 0,427079258  | 0,13104043 | 3,25914125 | 0,0011175  | 0,00585859 |          |
| ENSGALG00000015304  | 5360,75819 | 0,425237788  | 0,11685875 | 3,63890423 | 0,0002738  | 0,00179049 | SNX3     |
| ENSGALG000000020528 | 5739,52001 | 0,424819785  | 0,11091716 | 3,83006366 | 0,00012811 | 0,00092926 | INIP     |
| ENSGALG00000015603  | 3809,74973 | 0,424497436  | 0,13385318 | 3,171366   | 0,00151724 | 0,00750352 | ZCCHC9   |
| ENSGALG000000026692 | 7703,25537 | 0,424103985  | 0,13618907 | 3,11408229 | 0,00184518 | 0,00880243 | NRAS     |
| ENSGALG00000012009  | 3507,12317 | 0,422977808  | 0,12358938 | 3,42244456 | 0,00062061 | 0,0035925  | JKAMP    |
| ENSGALG000000027710 | 12308,995  | 0,421872733  | 0,10758636 | 3,92124726 | 8,81E-05   | 0,00067418 |          |
| ENSGALG00000000436  | 3616,92165 | 0,421563067  | 0,1280766  | 3,29149164 | 0,00099658 | 0,0053161  | RABIF    |
| ENSGALG000000008613 | 2544,37784 | 0,420884082  | 0,1331062  | 3,16201722 | 0,0015668  | 0,00772899 | NDUFA1   |
| ENSGALG00000007054  | 5550,73084 | 0,419262331  | 0,12272606 | 3,41624533 | 0,00063491 | 0,00365664 | TBC1D16  |
| ENSGALG00000017675  | 6606,96745 | 0,417757976  | 0,11206995 | 3,72765371 | 0,00019327 | 0,00132563 |          |
| ENSGALG000000008818 | 5178,18834 | 0,417517144  | 0,12931442 | 3,22869741 | 0,00124355 | 0,00640113 | IDH1     |
| ENSGALG000000026394 | 6922,09548 | 0,4171110916 | 0,11027253 | 3,78254597 | 0,00015523 | 0,00109906 |          |
| ENSGALG000000007220 | 48744,1762 | 0,415111704  | 0,10489641 | 3,95734916 | 7,58E-05   | 0,00058794 | FTH1     |
| ENSGALG00000001816  | 2247,2353  | 0,414935997  | 0,13272784 | 3,12621686 | 0,00177071 | 0,00851282 | MAGI3    |

|                    |            |             |            |            |            |            |         |
|--------------------|------------|-------------|------------|------------|------------|------------|---------|
| ENSGALG00000026802 | 39202,809  | 0,413746284 | 0,11461572 | 3,60985629 | 0,00030637 | 0,00197874 |         |
| ENSGALG00000015915 | 2924,59886 | 0,413737551 | 0,13087631 | 3,16128683 | 0,00157074 | 0,00773719 |         |
| ENSGALG00000012426 | 3567,37244 | 0,412512543 | 0,12505498 | 3,29864939 | 0,00097151 | 0,00520949 | DDHD1   |
| ENSGALG00000001201 | 7498,13604 | 0,411468635 | 0,10775001 | 3,81873406 | 0,00013414 | 0,00096819 | GFOD2   |
| ENSGALG00000024081 | 3055,10774 | 0,410810718 | 0,12976304 | 3,16585318 | 0,00154629 | 0,0076361  | TGIF2   |
| ENSGALG00000003750 | 7887,37064 | 0,409049332 | 0,1094937  | 3,73582537 | 0,0001871  | 0,00129184 | PLCG1   |
| ENSGALG00000008597 | 7184,86692 | 0,404910294 | 0,11988781 | 3,37740998 | 0,00073172 | 0,0041252  | MRPL2   |
| ENSGALG00000006505 | 3147,8767  | 0,40439474  | 0,12215456 | 3,31051698 | 0,00093124 | 0,00504931 | ZFAND6  |
| ENSGALG00000008143 | 14658,924  | 0,402789538 | 0,10639446 | 3,78581321 | 0,00015321 | 0,00108585 |         |
| ENSGALG00000003924 | 3485,26038 | 0,402077112 | 0,12622532 | 3,18539184 | 0,00144558 | 0,00723588 | ACBD6   |
| ENSGALG00000008508 | 3096,67282 | 0,401158456 | 0,12032341 | 3,33400181 | 0,00085606 | 0,00469403 | PYGB    |
| ENSGALG00000010704 | 15057,8876 | 0,401049242 | 0,10647647 | 3,76655286 | 0,00016552 | 0,00116401 |         |
| ENSGALG00000003371 | 6971,35561 | 0,400787786 | 0,11743488 | 3,4128513  | 0,00064287 | 0,00369623 |         |
| ENSGALG00000001096 | 5395,30498 | 0,399476875 | 0,12102428 | 3,30079943 | 0,0009641  | 0,00518412 |         |
| ENSGALG00000003412 | 4305,48949 | 0,398169298 | 0,11885899 | 3,34992998 | 0,00080832 | 0,00447915 |         |
| ENSGALG00000014970 | 13935,5595 | 0,397421157 | 0,10749714 | 3,69703948 | 0,00021813 | 0,00147386 | FSTL1   |
| ENSGALG00000003422 | 9411,16928 | 0,397187449 | 0,11024485 | 3,60277551 | 0,00031484 | 0,00202385 |         |
| ENSGALG00000001572 | 4170,73825 | 0,394480266 | 0,11780929 | 3,34846484 | 0,00081261 | 0,00449376 | COMMD4  |
| ENSGALG00000028470 | 5093,19173 | 0,39443368  | 0,12418131 | 3,17627247 | 0,00149181 | 0,00740195 |         |
| ENSGALG00000021047 | 9190,88912 | 0,393972396 | 0,12289699 | 3,20571241 | 0,00134729 | 0,00683431 | KIFAP3  |
| ENSGALG00000010490 | 10248,5665 | 0,389494511 | 0,11178754 | 3,4842389  | 0,00049354 | 0,00296799 | DPYSL4  |
| ENSGALG00000013000 | 7034,84966 | 0,388948819 | 0,1248778  | 3,11463547 | 0,00184172 | 0,00878902 |         |
| ENSGALG00000000955 | 5256,56158 | 0,388613492 | 0,11456174 | 3,39217531 | 0,0006934  | 0,00395006 | TMEM222 |
| ENSGALG00000015311 | 2435,46157 | 0,387705603 | 0,12617408 | 3,07278335 | 0,00212072 | 0,009926   | RNF38   |
| ENSGALG00000004011 | 4239,17688 | 0,385892717 | 0,12240581 | 3,15256855 | 0,00161841 | 0,00792043 |         |
| ENSGALG00000005337 | 6236,10371 | 0,385644449 | 0,10969262 | 3,51568283 | 0,00043862 | 0,00268278 | SNX2    |
| ENSGALG00000004086 | 6417,78519 | 0,385423377 | 0,12458188 | 3,09373553 | 0,00197654 | 0,00935043 |         |
| ENSGALG00000026102 | 19802,423  | 0,385336727 | 0,12172597 | 3,1656082  | 0,00154759 | 0,00763976 |         |
| ENSGALG00000016639 | 3515,28691 | 0,384196385 | 0,12279677 | 3,1287174  | 0,00175571 | 0,00846159 |         |
| ENSGALG00000026188 | 5641,89638 | 0,384179427 | 0,11525662 | 3,33325247 | 0,00085837 | 0,00470479 |         |
| ENSGALG00000008736 | 6339,84871 | 0,384117634 | 0,1174006  | 3,27185401 | 0,00106845 | 0,00564929 | PNPLA7  |
| ENSGALG00000008297 | 4909,6132  | 0,379216929 | 0,11488546 | 3,30082615 | 0,00096401 | 0,00518412 | SEMA4B  |
| ENSGALG00000007205 | 14498,1893 | 0,37857906  | 0,10495892 | 3,60692592 | 0,00030985 | 0,00199614 |         |
| ENSGALG00000028128 | 3864,66289 | 0,378077792 | 0,11727019 | 3,22398887 | 0,00126418 | 0,00648525 |         |
| ENSGALG00000015436 | 20607,2425 | 0,377556464 | 0,11268107 | 3,35066444 | 0,00080618 | 0,00447275 | SDCBP   |
| ENSGALG00000002053 | 9601,26321 | 0,376194926 | 0,11159082 | 3,37119972 | 0,00074842 | 0,00420366 |         |
| ENSGALG00000004191 | 5196,69877 | 0,374652449 | 0,11676506 | 3,20860067 | 0,00133383 | 0,0067774  | RIC8A   |
| ENSGALG00000003717 | 5316,70071 | 0,373543889 | 0,11309691 | 3,30286557 | 0,00095702 | 0,00515652 | MYO9B   |
| ENSGALG00000026291 | 5117,15968 | 0,37266418  | 0,11704722 | 3,18387886 | 0,00145316 | 0,00725779 |         |
| ENSGALG00000026421 | 20179,8154 | 0,372144283 | 0,11694539 | 3,18220567 | 0,00146158 | 0,00728649 | PSMB2   |
| ENSGALG00000006857 | 3516,26088 | 0,36847671  | 0,11911862 | 3,09335936 | 0,00197904 | 0,00935579 | SPATA20 |
| ENSGALG00000028249 | 8201,39743 | 0,366515679 | 0,10750136 | 3,40940496 | 0,00065105 | 0,00373536 |         |
| ENSGALG00000021692 | 6544,92461 | 0,361385734 | 0,11652843 | 3,10126669 | 0,00192695 | 0,00914762 |         |
| ENSGALG00000007589 | 8938,41629 | 0,360072922 | 0,10858113 | 3,31616491 | 0,00091262 | 0,00496041 |         |
| ENSGALG00000011435 | 8069,4783  | 0,35897775  | 0,11230455 | 3,19646662 | 0,00139122 | 0,0070167  |         |
| ENSGALG00000001330 | 11236,9836 | 0,358718136 | 0,11464643 | 3,12890804 | 0,00175457 | 0,00846159 | ATP5G1  |
| ENSGALG00000026517 | 6681,39607 | 0,355711572 | 0,11112537 | 3,1973011  | 0,0013872  | 0,00700287 | RFC5    |
| ENSGALG00000023073 | 19350,4834 | 0,353608475 | 0,10573559 | 3,34427114 | 0,00082499 | 0,00454598 |         |
| ENSGALG00000026565 | 5799,2794  | 0,352044819 | 0,11138453 | 3,16062577 | 0,00157431 | 0,00775196 |         |
| ENSGALG00000012229 | 22179,4003 | 0,350504617 | 0,10217867 | 3,43031096 | 0,00060289 | 0,00350934 | RPS29   |
| ENSGALG00000010347 | 11028,0806 | 0,346318448 | 0,1080262  | 3,20587467 | 0,00134653 | 0,0068343  | CCNG2   |
| ENSGALG00000026300 | 11402,689  | 0,345400821 | 0,1081778  | 3,19289927 | 0,00140852 | 0,00708947 |         |
| ENSGALG00000023447 | 10483,1653 | 0,344836567 | 0,10464307 | 3,29535984 | 0,00098296 | 0,00525853 |         |
| ENSGALG00000013784 | 13631,601  | 0,339967639 | 0,10798288 | 3,14834763 | 0,00164196 | 0,00802129 | CDT1    |
| ENSGALG00000015998 | 9692,12229 | 0,339150714 | 0,10588553 | 3,20299389 | 0,00136007 | 0,00689145 |         |
| ENSGALG00000024261 | 6604,44476 | 0,336614329 | 0,10865736 | 3,09794308 | 0,00194869 | 0,00924117 |         |
| ENSGALG00000000905 | 28204,5829 | 0,330518761 | 0,10726487 | 3,0813327  | 0,00206076 | 0,00967826 | PSMB4   |
| ENSGALG00000007272 | 8940,93056 | 0,327852784 | 0,10564224 | 3,10342513 | 0,00191295 | 0,00909384 | RNF166  |
| ENSGALG00000008443 | 36760,133  | 0,321038212 | 0,10104157 | 3,17728858 | 0,00148659 | 0,00737876 | ARHGDIA |
| ENSGALG00000015664 | 24898,2726 | 0,319058165 | 0,10032221 | 3,18033435 | 0,00147105 | 0,00732031 | ADD1    |
| ENSGALG00000012546 | 35449,6881 | 0,318249627 | 0,09997702 | 3,18322776 | 0,00145643 | 0,0072688  | MCM5    |
| ENSGALG00000011238 | 46142,4631 | 0,316616268 | 0,10217962 | 3,09862447 | 0,00194421 | 0,00922316 | WLS     |

|                    |            |              |            |            |            |            |         |
|--------------------|------------|--------------|------------|------------|------------|------------|---------|
| ENSGALG00000020078 | 34717,1709 | 0,313921783  | 0,09887982 | 3,17478105 | 0,0014995  | 0,00743198 |         |
| ENSGALG00000028600 | 142500,088 | 0,313870865  | 0,09855851 | 3,18461456 | 0,00144947 | 0,00725001 |         |
| ENSGALG00000010961 | 89733,2273 | -0,310634298 | 0,10095703 | -3,076896  | 0,00209168 | 0,00980319 | IGF2BP3 |
| ENSGALG00000003815 | 34063,9206 | -0,31144656  | 0,10097526 | -3,0843849 | 0,00203974 | 0,00959938 | RPN2    |
| ENSGALG00000004375 | 15903,9039 | -0,317187722 | 0,10291656 | -3,0819891 | 0,00205622 | 0,00966361 | VPS35   |
| ENSGALG00000010748 | 12682,3509 | -0,319116199 | 0,1031995  | -3,0922261 | 0,00198661 | 0,00938507 | EXO1    |
| ENSGALG00000005668 | 17427,2491 | -0,321274618 | 0,10214198 | -3,145373  | 0,00165875 | 0,00807145 | WSB1    |
| ENSGALG00000001817 | 20809,4267 | -0,321828859 | 0,10400477 | -3,0943663 | 0,00197234 | 0,00933381 | CTCF    |
| ENSGALG00000000235 | 25074,3258 | -0,321994098 | 0,10263119 | -3,1373902 | 0,00170459 | 0,00826202 | PPP2R2A |
| ENSGALG00000010178 | 15181,2565 | -0,322485727 | 0,10328298 | -3,1223512 | 0,00179413 | 0,00861017 | PUM3    |
| ENSGALG00000005758 | 19288,8311 | -0,323694502 | 0,10277128 | -3,149659  | 0,00163461 | 0,00799398 |         |
| ENSGALG00000006477 | 10679,2726 | -0,324083678 | 0,10402567 | -3,1154203 | 0,00183683 | 0,00877181 |         |
| ENSGALG00000002222 | 13238,2952 | -0,324594377 | 0,10274095 | -3,1593475 | 0,00158123 | 0,00777748 | NOC2L   |
| ENSGALG00000000814 | 43324,2546 | -0,325022823 | 0,09923062 | -3,2754289 | 0,00105502 | 0,00558913 | HNRNPR  |
| ENSGALG00000014575 | 10529,4114 | -0,325103377 | 0,10553605 | -3,0804959 | 0,00206656 | 0,00969881 | SEPHS1  |
| ENSGALG00000004780 | 17002,1156 | -0,326184617 | 0,10404378 | -3,1350709 | 0,00171813 | 0,0083217  |         |
| ENSGALG00000011091 | 12877,9103 | -0,326829517 | 0,1036675  | -3,152671  | 0,00161784 | 0,00792043 | NUP133  |
| ENSGALG00000001262 | 15946,3219 | -0,32743844  | 0,10659706 | -3,0717398 | 0,00212815 | 0,00994712 | CLIC4   |
| ENSGALG00000004161 | 24484,0776 | -0,327725215 | 0,10319068 | -3,1759188 | 0,00149363 | 0,00740828 | CCNB2   |
| ENSGALG00000014286 | 15937,5586 | -0,329230926 | 0,10635463 | -3,0955955 | 0,00196418 | 0,00930168 |         |
| ENSGALG00000002062 | 16195,7787 | -0,329944458 | 0,10510199 | -3,139279  | 0,00169364 | 0,00821945 | SRP68   |
| ENSGALG00000001962 | 54240,9734 | -0,330389801 | 0,10379904 | -3,1829756 | 0,0014577  | 0,00727247 | PTBP1   |
| ENSGALG00000010576 | 13964,8988 | -0,330632554 | 0,10260922 | -3,2222498 | 0,00127188 | 0,00651983 | GTF2A1  |
| ENSGALG00000010481 | 12612,5746 | -0,330642085 | 0,10591126 | -3,1218786 | 0,00179701 | 0,00862096 | CMPK1   |
| ENSGALG00000010341 | 71633,3369 | -0,33081711  | 0,10337066 | -3,2002997 | 0,00137285 | 0,00694328 | XPO5    |
| ENSGALG00000007387 | 14223,8054 | -0,330955786 | 0,10651466 | -3,1071383 | 0,00188908 | 0,00898666 | GTF3C1  |
| ENSGALG00000003547 | 13605,0703 | -0,331189406 | 0,10621784 | -3,1180207 | 0,0018207  | 0,00871312 | SKP2    |
| ENSGALG00000014445 | 19258,1997 | -0,331954776 | 0,10745587 | -3,0892197 | 0,00200683 | 0,00947071 |         |
| ENSGALG00000007590 | 10666,5636 | -0,332146464 | 0,10813379 | -3,0716251 | 0,00212897 | 0,00994712 | MTMR8   |
| ENSGALG00000004108 | 32339,0897 | -0,332634184 | 0,10036764 | -3,3141577 | 0,0009192  | 0,00499197 | CCAR1   |
| ENSGALG00000007528 | 28367,4799 | -0,33311917  | 0,10609529 | -3,1398111 | 0,00169057 | 0,00820866 | TCERG1  |
| ENSGALG00000005177 | 21314,8021 | -0,333333735 | 0,1014573  | -3,2854583 | 0,00101817 | 0,00541709 |         |
| ENSGALG00000001976 | 9937,86887 | -0,333600989 | 0,10865793 | -3,0701945 | 0,00213919 | 0,00998662 | TRIM33  |
| ENSGALG00000009332 | 24425,5213 | -0,334253024 | 0,10229188 | -3,26764   | 0,00108448 | 0,0057141  | RBM25   |
| ENSGALG00000014298 | 14009,4127 | -0,335955725 | 0,10618376 | -3,1639087 | 0,00155666 | 0,00768172 | RFC1    |
| ENSGALG00000003231 | 28849,9366 | -0,336908133 | 0,1031629  | -3,2657877 | 0,0010916  | 0,00574493 |         |
| ENSGALG00000014327 | 7067,9269  | -0,338948318 | 0,10818125 | -3,1331523 | 0,0017294  | 0,00836141 |         |
| ENSGALG00000002302 | 11281,3267 | -0,339317581 | 0,10876186 | -3,1198214 | 0,00180961 | 0,00866613 |         |
| ENSGALG00000005966 | 13999,7426 | -0,340533213 | 0,11012393 | -3,0922727 | 0,0019863  | 0,00938507 | SEC61A1 |
| ENSGALG00000012202 | 8130,08702 | -0,341191282 | 0,10806076 | -3,1574023 | 0,00159182 | 0,00781275 |         |
| ENSGALG00000007989 | 28672,5886 | -0,341827011 | 0,10925868 | -3,1286027 | 0,0017564  | 0,0084619  | ADNP    |
| ENSGALG00000005237 | 11277,3975 | -0,342909039 | 0,10563626 | -3,24613   | 0,00116985 | 0,00608154 | FGD3    |
| ENSGALG00000016314 | 22102,7105 | -0,343364339 | 0,10699123 | -3,2092755 | 0,0013307  | 0,00677035 | ELOVL5  |
| ENSGALG00000012239 | 9046,42319 | -0,343596083 | 0,10589827 | -3,2445865 | 0,00117621 | 0,0061076  | METAP1  |
| ENSGALG00000001236 | 5792,05952 | -0,345759524 | 0,11038031 | -3,1324386 | 0,00173361 | 0,00837771 |         |
| ENSGALG00000012837 | 7840,94956 | -0,345878883 | 0,10966121 | -3,1540676 | 0,00161012 | 0,00788836 | EXOC2   |
| ENSGALG00000006475 | 6864,19423 | -0,347016477 | 0,10794054 | -3,2148856 | 0,00130497 | 0,00666433 |         |
| ENSGALG00000015553 | 10445,9765 | -0,347410904 | 0,11270003 | -3,082616  | 0,0020519  | 0,00964994 |         |
| ENSGALG00000011831 | 9083,64488 | -0,347478626 | 0,11085227 | -3,1346101 | 0,00172083 | 0,00832589 | ANKRD50 |
| ENSGALG00000004269 | 64393,6529 | -0,347526191 | 0,10378498 | -3,348521  | 0,00081244 | 0,00449376 |         |
| ENSGALG00000004200 | 11378,582  | -0,347970886 | 0,10751163 | -3,2365883 | 0,00120968 | 0,00626227 | DPP9    |
| ENSGALG00000016887 | 64639,1062 | -0,348222743 | 0,09787488 | -3,5578355 | 0,00037392 | 0,00234499 |         |
| ENSGALG00000013649 | 18631,1873 | -0,348311839 | 0,10201524 | -3,4143117 | 0,00063943 | 0,00367803 | CNOT7   |
| ENSGALG00000017139 | 10651,9101 | -0,349554954 | 0,10704704 | -3,265433  | 0,00109297 | 0,00574991 |         |
| ENSGALG00000002719 | 17659,4459 | -0,349571816 | 0,10180837 | -3,4336254 | 0,00059557 | 0,00347116 | CSNK1D  |
| ENSGALG00000008454 | 36878,682  | -0,351028215 | 0,10381886 | -3,3811602 | 0,0007218  | 0,00408283 | NOP58   |
| ENSGALG00000017026 | 9366,38767 | -0,352330056 | 0,10866839 | -3,2422496 | 0,0011859  | 0,00615322 | VPS36   |
| ENSGALG00000007861 | 11084,8862 | -0,352469383 | 0,10824618 | -3,2561832 | 0,00112921 | 0,0059177  | MAGT1   |
| ENSGALG00000005569 | 11340,4378 | -0,352585966 | 0,10935005 | -3,2243787 | 0,00126246 | 0,00648    | USP47   |
| ENSGALG00000009913 | 62516,8642 | -0,353547892 | 0,09880506 | -3,5782367 | 0,00034592 | 0,00219771 | SMARCA5 |
| ENSGALG00000011620 | 9603,38362 | -0,353615473 | 0,10554783 | -3,3502865 | 0,00080728 | 0,00447521 | AKT1    |
| ENSGALG00000010177 | 12046,3189 | -0,353917428 | 0,10807412 | -3,2747656 | 0,0010575  | 0,00560008 | ZFC3H1  |

|                     |            |              |            |            |            |            |          |
|---------------------|------------|--------------|------------|------------|------------|------------|----------|
| ENSGALG000000015043 | 11145,3654 | -0,35411601  | 0,10996307 | -3,2203176 | 0,00128049 | 0,006559   |          |
| ENSGALG00000008036  | 5782,62739 | -0,355406874 | 0,1116416  | -3,1834627 | 0,00145525 | 0,00726557 | TMEM209  |
| ENSGALG000000005125 | 7959,32707 | -0,356020767 | 0,10674059 | -3,3353833 | 0,00085182 | 0,00467642 | LSM14B   |
| ENSGALG000000001811 | 14773,9745 | -0,357025162 | 0,11419157 | -3,1265456 | 0,00176873 | 0,00851143 |          |
| ENSGALG000000008957 | 22456,5253 | -0,357191503 | 0,11566926 | -3,0880418 | 0,0020148  | 0,00949845 | MSH6     |
| ENSGALG000000009330 | 6639,49466 | -0,358006963 | 0,1142065  | -3,1347337 | 0,0017201  | 0,00832534 | DEGS1    |
| ENSGALG000000010763 | 6453,8983  | -0,358059956 | 0,11268149 | -3,1776289 | 0,00148485 | 0,00737279 | TRIP11   |
| ENSGALG000000008507 | 23518,146  | -0,358201653 | 0,10237686 | -3,4988536 | 0,00046726 | 0,00283376 | THOC2    |
| ENSGALG000000009839 | 30979,5758 | -0,358257804 | 0,10121654 | -3,5395182 | 0,00040086 | 0,00249096 | PPIG     |
| ENSGALG000000010349 | 7048,15428 | -0,358393493 | 0,11290442 | -3,1743089 | 0,00150194 | 0,00744137 | POLR1C   |
| ENSGALG000000007721 | 11622,16   | -0,358457512 | 0,10981787 | -3,2641091 | 0,00109809 | 0,00577239 | ARHGAP21 |
| ENSGALG000000005694 | 30867,6614 | -0,359162398 | 0,10218229 | -3,5149181 | 0,00043989 | 0,00268931 | GARS     |
| ENSGALG000000008254 | 17757,2659 | -0,35964551  | 0,10795091 | -3,3315652 | 0,00086359 | 0,0047277  |          |
| ENSGALG000000007683 | 31803,1359 | -0,359759566 | 0,1106419  | -3,251567  | 0,00114771 | 0,00599848 |          |
| ENSGALG000000004670 | 7571,3318  | -0,360055666 | 0,10915595 | -3,2985436 | 0,00097188 | 0,00520949 |          |
| ENSGALG000000024039 | 12181,8658 | -0,36099515  | 0,10495725 | -3,4394494 | 0,0005829  | 0,00340658 |          |
| ENSGALG000000004379 | 20460,5219 | -0,361272684 | 0,10336925 | -3,4949725 | 0,00047411 | 0,00287042 | BCL7A    |
| ENSGALG000000012763 | 12297,8834 | -0,362574608 | 0,10840365 | -3,3446715 | 0,0008238  | 0,00454275 | GNPTAB   |
| ENSGALG000000001942 | 6053,36315 | -0,362623052 | 0,11586077 | -3,1298174 | 0,00174915 | 0,00844792 | SPDL1    |
| ENSGALG000000012916 | 8111,10575 | -0,362729901 | 0,10919421 | -3,3218786 | 0,00089414 | 0,00487922 | DROSHA   |
| ENSGALG000000002139 | 98917,1679 | -0,362887161 | 0,10160459 | -3,5715625 | 0,00035486 | 0,00224229 | CSDE1    |
| ENSGALG000000009325 | 21860,6433 | -0,363294006 | 0,11100817 | -3,2726781 | 0,00106534 | 0,00563941 |          |
| ENSGALG000000003826 | 8394,88602 | -0,363869123 | 0,10711719 | -3,3969255 | 0,00068148 | 0,00389027 | ANAPC7   |
| ENSGALG000000001790 | 14734,6451 | -0,363943316 | 0,1104661  | -3,2946155 | 0,00098556 | 0,00526834 |          |
| ENSGALG000000004553 | 9745,08279 | -0,363967467 | 0,10494768 | -3,4680848 | 0,00052418 | 0,00312057 | SGPL1    |
| ENSGALG000000001663 | 10259,5734 | -0,364202029 | 0,10990467 | -3,3137995 | 0,00092037 | 0,00499637 | MAK16    |
| ENSGALG000000010900 | 12043,9228 | -0,364291872 | 0,11281721 | -3,2290452 | 0,00124204 | 0,00640061 | SPC25    |
| ENSGALG000000003563 | 13287,7659 | -0,364389392 | 0,11010466 | -3,3094822 | 0,00093469 | 0,00506145 | YARS     |
| ENSGALG000000002137 | 15220,8927 | -0,364569255 | 0,10476883 | -3,4797493 | 0,00050188 | 0,00300887 | PGAM5    |
| ENSGALG000000001126 | 13435,9211 | -0,365650894 | 0,10394749 | -3,5176502 | 0,00043539 | 0,00266657 | CHAF1A   |
| ENSGALG000000015874 | 13228,0992 | -0,365980992 | 0,10796169 | -3,3899153 | 0,00069914 | 0,00397612 | TTK      |
| ENSGALG000000003339 | 10767,0615 | -0,366040447 | 0,11772436 | -3,1093007 | 0,00187531 | 0,00892426 | MTOR     |
| ENSGALG000000010400 | 7431,8392  | -0,366106792 | 0,10709024 | -3,4186756 | 0,00062927 | 0,00363171 |          |
| ENSGALG000000014867 | 5553,43093 | -0,366420731 | 0,11739665 | -3,1212197 | 0,00180104 | 0,00863589 | PAIP1    |
| ENSGALG000000006193 | 20925,4656 | -0,366551091 | 0,11528348 | -3,179563  | 0,00147497 | 0,0073322  |          |
| ENSGALG000000005353 | 4596,56596 | -0,367159893 | 0,11954477 | -3,0713171 | 0,00213117 | 0,00995398 | FAR1     |
| ENSGALG000000015683 | 11433,1929 | -0,367498221 | 0,1101651  | -3,335886  | 0,00085028 | 0,00466985 | GNG10    |
| ENSGALG000000003171 | 20304,0548 | -0,367614474 | 0,10192128 | -3,6068472 | 0,00030994 | 0,00199614 |          |
| ENSGALG000000028828 | 22676,6926 | -0,367651199 | 0,10280751 | -3,5761124 | 0,00034874 | 0,00221461 |          |
| ENSGALG000000024159 | 24561,8039 | -0,368265263 | 0,10651918 | -3,4572673 | 0,00054568 | 0,0032246  |          |
| ENSGALG000000003881 | 9972,69972 | -0,368271023 | 0,11805058 | -3,1196037 | 0,00181095 | 0,00866949 | ERCC6L   |
| ENSGALG000000001619 | 9403,98709 | -0,368532524 | 0,1142023  | -3,2270149 | 0,00125089 | 0,00643402 | ATG16L1  |
| ENSGALG000000004115 | 26356,0947 | -0,369026879 | 0,10774308 | -3,4250635 | 0,00061466 | 0,00356867 | DNAJA2   |
| ENSGALG000000012266 | 5845,05186 | -0,369135559 | 0,11234414 | -3,2857571 | 0,00101709 | 0,00541346 |          |
| ENSGALG000000008526 | 11139,8409 | -0,369313202 | 0,10883113 | -3,3934519 | 0,00069018 | 0,00393499 |          |
| ENSGALG000000001485 | 7897,80461 | -0,369653264 | 0,10794906 | -3,4243306 | 0,00061632 | 0,00357526 |          |
| ENSGALG000000012263 | 9464,40856 | -0,36996383  | 0,10644059 | -3,4757776 | 0,00050937 | 0,00304173 | NEMF     |
| ENSGALG000000007509 | 10510,1509 | -0,37005709  | 0,10740052 | -3,4455801 | 0,00056983 | 0,00334551 |          |
| ENSGALG000000008807 | 7903,608   | -0,370129883 | 0,10704402 | -3,4577352 | 0,00054474 | 0,0032218  | DCUN1D1  |
| ENSGALG000000014582 | 21606,21   | -0,370326496 | 0,10926121 | -3,3893683 | 0,00070054 | 0,00398239 | CADM1    |
| ENSGALG000000010296 | 6483,94047 | -0,370634079 | 0,11535942 | -3,2128637 | 0,00131419 | 0,00670137 | MRPS18A  |
| ENSGALG000000011215 | 4111,7689  | -0,370718656 | 0,11588474 | -3,1990291 | 0,00137891 | 0,00696619 |          |
| ENSGALG000000004254 | 3591,44306 | -0,370755667 | 0,11847879 | -3,1292998 | 0,00175223 | 0,00845981 |          |
| ENSGALG000000015649 | 13211,5423 | -0,370890117 | 0,10670353 | -3,4758935 | 0,00050915 | 0,00304173 | NOP14    |
| ENSGALG000000008557 | 15377,869  | -0,371010327 | 0,10757228 | -3,4489398 | 0,00056279 | 0,00331419 | ARL5B    |
| ENSGALG000000005935 | 6194,93972 | -0,371684146 | 0,110711   | -3,3572469 | 0,00078723 | 0,00439447 |          |
| ENSGALG000000004834 | 12710,539  | -0,372460145 | 0,10851246 | -3,4324184 | 0,00059822 | 0,00348367 | COPS3    |
| ENSGALG000000016578 | 7057,34653 | -0,372483757 | 0,11837004 | -3,1467739 | 0,00165083 | 0,00804438 |          |
| ENSGALG000000003039 | 8776,91996 | -0,372512284 | 0,10936842 | -3,4060314 | 0,00065915 | 0,00377229 | SRM      |
| ENSGALG000000015705 | 13014,2962 | -0,372615903 | 0,12101628 | -3,0790561 | 0,00207658 | 0,00974245 | WHSC1    |
| ENSGALG000000011713 | 7918,94572 | -0,372947939 | 0,11560014 | -3,2261893 | 0,0012545  | 0,00644774 |          |
| ENSGALG000000000412 | 5015,41988 | -0,373361237 | 0,1191944  | -3,1323723 | 0,001734   | 0,00837771 |          |



|                    |            |              |            |            |            |            |          |
|--------------------|------------|--------------|------------|------------|------------|------------|----------|
| ENSGALG00000003942 | 9873,26393 | -0,373719716 | 0,10787221 | -3,4644669 | 0,00053128 | 0,00315594 | LONP2    |
| ENSGALG00000016236 | 30922,9868 | -0,374432078 | 0,11350948 | -3,2986854 | 0,00097139 | 0,00520949 |          |
| ENSGALG00000005618 | 12381,3407 | -0,374714579 | 0,10648923 | -3,5188027 | 0,0004335  | 0,002661   | CTR9     |
| ENSGALG00000010744 | 5078,21857 | -0,375014992 | 0,11759876 | -3,1889367 | 0,00142797 | 0,00716617 | GALNT7   |
| ENSGALG00000009626 | 5852,86848 | -0,375704266 | 0,12017862 | -3,1262155 | 0,00177072 | 0,00851282 | THBS1    |
| ENSGALG00000009677 | 24959,7858 | -0,376298569 | 0,10417999 | -3,6120043 | 0,00030384 | 0,00196335 | UBP      |
| ENSGALG00000004867 | 10358,5874 | -0,376546151 | 0,10686348 | -3,5236186 | 0,0004257  | 0,00262613 |          |
| ENSGALG00000000085 | 18552,0192 | -0,37666785  | 0,10734971 | -3,5087925 | 0,00045015 | 0,00274339 |          |
| ENSGALG00000011281 | 6523,20431 | -0,37690737  | 0,11786547 | -3,1977759 | 0,00138492 | 0,00699394 |          |
| ENSGALG00000008247 | 7600,6846  | -0,377692943 | 0,10953801 | -3,4480537 | 0,00056464 | 0,00332221 | ARFGAP2  |
| ENSGALG00000005006 | 11070,7539 | -0,377708377 | 0,10759882 | -3,5103394 | 0,00044754 | 0,00273115 | UBA2     |
| ENSGALG00000000978 | 4782,69426 | -0,377763607 | 0,11791314 | -3,2037448 | 0,00135653 | 0,00687606 | CEP104   |
| ENSGALG00000002985 | 14604,5417 | -0,378678888 | 0,10567575 | -3,5834037 | 0,00033915 | 0,00216174 | UTP18    |
| ENSGALG00000016851 | 8342,75174 | -0,378897954 | 0,12010288 | -3,1547783 | 0,0016062  | 0,0078758  |          |
| ENSGALG00000008195 | 5727,11476 | -0,378910892 | 0,11315331 | -3,3486506 | 0,00081206 | 0,00449376 | NPHP1    |
| ENSGALG00000024047 | 6900,30697 | -0,380223912 | 0,11575902 | -3,2846159 | 0,00102121 | 0,00543119 | MYCL     |
| ENSGALG00000007036 | 8649,57445 | -0,380541953 | 0,10600071 | -3,5899944 | 0,00033069 | 0,00211673 | PITRM1   |
| ENSGALG00000005573 | 47811,3213 | -0,380592325 | 0,10049182 | -3,7872967 | 0,0001523  | 0,00108107 |          |
| ENSGALG00000008187 | 22960,7008 | -0,380821067 | 0,1023642  | -3,7202565 | 0,00019902 | 0,00135687 | EIF3J    |
| ENSGALG00000000864 | 4682,06821 | -0,380939683 | 0,11598398 | -3,2844163 | 0,00102194 | 0,00543291 | FBXW2    |
| ENSGALG00000004696 | 6529,78459 | -0,381141883 | 0,10996498 | -3,4660297 | 0,0005282  | 0,0031404  | LEO1     |
| ENSGALG00000011330 | 86092,558  | -0,381207584 | 0,11735831 | -3,2482368 | 0,00116123 | 0,00605055 | DYNC1H1  |
| ENSGALG00000012953 | 7564,61929 | -0,381744469 | 0,11014956 | -3,4656922 | 0,00052887 | 0,00314297 | IPO8     |
| ENSGALG00000007559 | 4279,21636 | -0,381904484 | 0,1214524  | -3,1444788 | 0,00166383 | 0,00809326 | PDSS1    |
| ENSGALG00000008587 | 12026,0733 | -0,382953864 | 0,1040771  | -3,679521  | 0,00023367 | 0,0015626  | NDUFAF1  |
| ENSGALG00000001596 | 12885,5925 | -0,383722949 | 0,10902521 | -3,51958   | 0,00043223 | 0,00265657 | MLLT1    |
| ENSGALG00000004839 | 5677,61086 | -0,383869776 | 0,11257961 | -3,409763  | 0,00065019 | 0,00373203 | GPATCH1  |
| ENSGALG00000002346 | 7982,38435 | -0,383971209 | 0,11217493 | -3,422968  | 0,00061941 | 0,00358865 | CLSPN    |
| ENSGALG00000016040 | 7227,33788 | -0,384424184 | 0,11393306 | -3,3741233 | 0,00074051 | 0,00416572 |          |
| ENSGALG00000011881 | 17920,0092 | -0,384788496 | 0,10123697 | -3,8008694 | 0,00014419 | 0,0010289  | CCNA2    |
| ENSGALG00000017105 | 3524,63272 | -0,385190009 | 0,11906547 | -3,235111  | 0,00121595 | 0,0062852  | RNF6     |
| ENSGALG00000015010 | 9588,37587 | -0,38521292  | 0,11536985 | -3,3389394 | 0,00084099 | 0,00462442 |          |
| ENSGALG00000015040 | 4593,81042 | -0,38608617  | 0,11721149 | -3,2939277 | 0,00098798 | 0,00527917 | SLC16A10 |
| ENSGALG00000013061 | 7957,2214  | -0,38617661  | 0,11279114 | -3,4238206 | 0,00061747 | 0,00358045 | PAPD7    |
| ENSGALG00000011357 | 6554,71543 | -0,387039211 | 0,1110437  | -3,4854674 | 0,00049128 | 0,0029557  | VEZT     |
| ENSGALG00000006259 | 19676,996  | -0,387217866 | 0,1021071  | -3,7922717 | 0,00014928 | 0,00106185 |          |
| ENSGALG00000027774 | 12094,1246 | -0,387231267 | 0,11361387 | -3,4083098 | 0,00065367 | 0,00374408 |          |
| ENSGALG00000008280 | 7969,07752 | -0,387606949 | 0,11109303 | -3,4890303 | 0,00048478 | 0,00292304 | PMPCB    |
| ENSGALG00000012724 | 10174,9584 | -0,387874274 | 0,1052864  | -3,6839923 | 0,00022961 | 0,00154105 | PAK1IP1  |
| ENSGALG00000015247 | 7003,54363 | -0,387982807 | 0,10807809 | -3,5898377 | 0,00033088 | 0,002117   | GPR161   |
| ENSGALG00000027262 | 21153,6502 | -0,388074983 | 0,10134615 | -3,8292029 | 0,00012856 | 0,00093152 | CAB39    |
| ENSGALG00000005575 | 18548,7794 | -0,388395592 | 0,10808819 | -3,5933214 | 0,00032649 | 0,00209381 | AKAP1    |
| ENSGALG00000010609 | 3709,28931 | -0,388677075 | 0,12431812 | -3,1264715 | 0,00176918 | 0,00851143 | NDUFAF7  |
| ENSGALG00000005012 | 6065,17104 | -0,388993034 | 0,12158189 | -3,1994324 | 0,00137698 | 0,00695904 |          |
| ENSGALG00000005904 | 32126,5427 | -0,389017981 | 0,1104816  | -3,5211109 | 0,00042974 | 0,0026439  | TMED5    |
| ENSGALG00000011103 | 30281,6359 | -0,389199345 | 0,10207015 | -3,8130574 | 0,00013726 | 0,0009872  |          |
| ENSGALG00000007788 | 4541,30869 | -0,389226557 | 0,11718497 | -3,3214717 | 0,00089544 | 0,00488438 | ABCB7    |
| ENSGALG00000003166 | 4550,92062 | -0,38962163  | 0,1147713  | -3,3947653 | 0,00068687 | 0,0039178  |          |
| ENSGALG00000002129 | 6971,21336 | -0,390332447 | 0,11138482 | -3,5043595 | 0,00045771 | 0,00278449 | WDR47    |
| ENSGALG00000007485 | 13617,2364 | -0,391583137 | 0,1247391  | -3,1392172 | 0,001694   | 0,00821945 | TFRC     |
| ENSGALG00000008983 | 6819,43432 | -0,391807233 | 0,11487703 | -3,4106665 | 0,00064804 | 0,00372126 | GNB4     |
| ENSGALG00000009364 | 15815,3872 | -0,391850394 | 0,10698859 | -3,6625439 | 0,00024972 | 0,00165578 | PRKCI    |
| ENSGALG00000028035 | 5338,91852 | -0,391942986 | 0,12309173 | -3,1841536 | 0,00145178 | 0,00725779 |          |
| ENSGALG00000017064 | 15165,1186 | -0,392266132 | 0,10750673 | -3,6487589 | 0,00026351 | 0,00173402 | RFC3     |
| ENSGALG00000013410 | 8555,69148 | -0,392331865 | 0,10734883 | -3,6547383 | 0,00025744 | 0,00169986 | UBA3     |
| ENSGALG00000003277 | 6528,68057 | -0,393093094 | 0,11637559 | -3,3777968 | 0,00073069 | 0,00412281 | SUZ12    |
| ENSGALG00000002682 | 5643,05491 | -0,393160876 | 0,12282679 | -3,2009375 | 0,00136981 | 0,00693308 | BRD3     |
| ENSGALG00000004481 | 5167,72741 | -0,39336646  | 0,12164503 | -3,2337242 | 0,00122187 | 0,00630861 |          |
| ENSGALG00000015865 | 4560,35143 | -0,393610955 | 0,11603457 | -3,3921868 | 0,00069337 | 0,00395006 |          |
| ENSGALG00000009569 | 11508,232  | -0,393918558 | 0,10692863 | -3,6839392 | 0,00022966 | 0,00154105 | TLK1     |
| ENSGALG00000009201 | 11168,2886 | -0,39393497  | 0,11185482 | -3,5218417 | 0,00042856 | 0,00263991 |          |
| ENSGALG00000028133 | 7664,26535 | -0,394703045 | 0,11653188 | -3,387082  | 0,0007064  | 0,00400736 | UBE2V2   |

|                    |            |              |            |            |            |            |         |
|--------------------|------------|--------------|------------|------------|------------|------------|---------|
| ENSGALG00000028898 | 2507,09906 | -0,395098922 | 0,12861106 | -3,0720448 | 0,00212598 | 0,00994339 | CPTP    |
| ENSGALG00000016467 | 8711,55629 | -0,395365049 | 0,11946994 | -3,3093265 | 0,00093521 | 0,00506145 | SMC6    |
| ENSGALG00000003043 | 3489,75229 | -0,395518744 | 0,12292663 | -3,2175188 | 0,00129305 | 0,00661835 |         |
| ENSGALG00000002076 | 11878,1242 | -0,395918706 | 0,11403726 | -3,4718362 | 0,00051691 | 0,00308268 |         |
| ENSGALG00000008521 | 16274,1776 | -0,395949661 | 0,12761742 | -3,1026303 | 0,00191809 | 0,00911512 |         |
| ENSGALG00000014688 | 9710,78641 | -0,396059354 | 0,12498284 | -3,16891   | 0,00153012 | 0,00756173 | ZYX     |
| ENSGALG00000004256 | 8236,22082 | -0,396589984 | 0,11400406 | -3,4787357 | 0,00050379 | 0,00301496 |         |
| ENSGALG00000010643 | 4501,85662 | -0,396627508 | 0,11751597 | -3,3750945 | 0,0007379  | 0,00415399 | ZYG11B  |
| ENSGALG00000012759 | 9679,72927 | -0,396656849 | 0,1130301  | -3,5093027 | 0,00044928 | 0,00274028 | NUP37   |
| ENSGALG00000004435 | 2804,79298 | -0,396797105 | 0,12438966 | -3,1899524 | 0,00142296 | 0,00714894 | RAB27A  |
| ENSGALG00000009608 | 5107,67868 | -0,396825966 | 0,12732928 | -3,1165335 | 0,00182991 | 0,0087449  |         |
| ENSGALG00000009838 | 16688,775  | -0,397053502 | 0,10163734 | -3,9065711 | 9,36E-05   | 0,00070928 | AQR     |
| ENSGALG00000009533 | 7127,79412 | -0,397081701 | 0,12818092 | -3,0978221 | 0,00194948 | 0,00924172 | NMD3    |
| ENSGALG00000015435 | 3490,23228 | -0,397319834 | 0,12169857 | -3,2647865 | 0,00109547 | 0,00576082 | DCAF6   |
| ENSGALG00000015215 | 6704,29174 | -0,397390834 | 0,12048616 | -3,2982281 | 0,00097297 | 0,00521125 | MAPRE2  |
| ENSGALG00000013776 | 3256,83732 | -0,397455529 | 0,12774216 | -3,1113889 | 0,0018621  | 0,00886759 | CEP135  |
| ENSGALG00000002675 | 3557,32889 | -0,397531672 | 0,12525226 | -3,1738483 | 0,00150432 | 0,00744777 | SCUBE3  |
| ENSGALG00000009322 | 5962,2024  | -0,397973054 | 0,11357624 | -3,5040168 | 0,0004583  | 0,00278683 | NVL     |
| ENSGALG00000001576 | 13166,5037 | -0,398019961 | 0,10682503 | -3,7259054 | 0,00019462 | 0,00133284 |         |
| ENSGALG00000008889 | 7462,94615 | -0,398667809 | 0,10789505 | -3,6949593 | 0,00021992 | 0,00148303 | TTC14   |
| ENSGALG00000010674 | 9662,45958 | -0,399166032 | 0,11134741 | -3,5848703 | 0,00033725 | 0,00215164 | DCTD    |
| ENSGALG00000006483 | 5623,94704 | -0,399267586 | 0,12106372 | -3,2979954 | 0,00097378 | 0,00521352 |         |
| ENSGALG00000004368 | 3768,91401 | -0,39990946  | 0,1253746  | -3,1897167 | 0,00142412 | 0,00715213 |         |
| ENSGALG00000001377 | 9703,5691  | -0,400093128 | 0,10731064 | -3,7283641 | 0,00019273 | 0,0013239  | POLRMT  |
| ENSGALG00000020251 | 2658,23573 | -0,40015479  | 0,12471527 | -3,2085468 | 0,00133408 | 0,0067774  | FNIP2   |
| ENSGALG00000007663 | 14617,8334 | -0,400171791 | 0,11471241 | -3,4884785 | 0,00048578 | 0,00292778 | KDM3B   |
| ENSGALG00000008289 | 17537,4534 | -0,401142997 | 0,11170507 | -3,5910904 | 0,0003293  | 0,00210884 | RBM19   |
| ENSGALG00000000332 | 20852,8348 | -0,401294712 | 0,10538837 | -3,8077702 | 0,00014023 | 0,00100589 |         |
| ENSGALG00000016747 | 15836,0603 | -0,401466819 | 0,10405    | -3,8584028 | 0,00011413 | 0,00083858 |         |
| ENSGALG00000001094 | 14665,6234 | -0,40156915  | 0,12409768 | -3,2359118 | 0,00121255 | 0,00627312 | ADGRD2  |
| ENSGALG00000011493 | 4936,29609 | -0,401631833 | 0,1189649  | -3,3760533 | 0,00073534 | 0,00414216 | TMEM169 |
| ENSGALG00000010304 | 4399,91638 | -0,401743756 | 0,11989741 | -3,3507292 | 0,00080599 | 0,00447275 | MLH3    |
| ENSGALG00000001422 | 12037,3785 | -0,402405365 | 0,1260368  | -3,1927608 | 0,0014092  | 0,00709025 |         |
| ENSGALG00000005516 | 8167,22794 | -0,402406965 | 0,10796988 | -3,7270299 | 0,00019375 | 0,00132825 | HEATR6  |
| ENSGALG00000012138 | 29874,2309 | -0,402996238 | 0,10409408 | -3,8714616 | 0,00010818 | 0,00080225 |         |
| ENSGALG00000011379 | 3502,29926 | -0,403264726 | 0,12185227 | -3,3094561 | 0,00093477 | 0,00506145 | SLC44A5 |
| ENSGALG00000004486 | 7663,27363 | -0,403537703 | 0,11899283 | -3,3912775 | 0,00069568 | 0,00396137 | ZCCHC8  |
| ENSGALG00000011505 | 19437,7359 | -0,403647787 | 0,1041549  | -3,8754564 | 0,00010643 | 0,00079353 | MARK3   |
| ENSGALG00000007610 | 8753,25449 | -0,403710794 | 0,10808926 | -3,734976  | 0,00018773 | 0,00129417 | CDC23   |
| ENSGALG00000003219 | 2817,88024 | -0,403748967 | 0,12502192 | -3,2294255 | 0,00124039 | 0,00639452 |         |
| ENSGALG00000003033 | 4208,03288 | -0,4040823   | 0,12394506 | -3,2601726 | 0,00111344 | 0,00583958 |         |
| ENSGALG00000009887 | 7499,04151 | -0,404219345 | 0,11161371 | -3,6215922 | 0,0002928  | 0,00190191 | DIEXF   |
| ENSGALG00000016070 | 5235,92577 | -0,404284672 | 0,11391617 | -3,5489664 | 0,00038675 | 0,00240876 | WRB     |
| ENSGALG00000005558 | 18603,5366 | -0,404537586 | 0,10210074 | -3,9621417 | 7,43E-05   | 0,0005792  | TBL3    |
| ENSGALG00000003358 | 9790,28902 | -0,404595333 | 0,1105122  | -3,6610919 | 0,00025114 | 0,0016639  | UBIAD1  |
| ENSGALG00000010428 | 7926,19447 | -0,404704607 | 0,10820488 | -3,7401697 | 0,0001839  | 0,00127223 | FAM98A  |
| ENSGALG00000012509 | 6088,11777 | -0,40489721  | 0,11727746 | -3,4524724 | 0,00055547 | 0,00327393 |         |
| ENSGALG00000016034 | 11941,1216 | -0,4051791   | 0,11639003 | -3,4812184 | 0,00049914 | 0,00299769 | ATRN    |
| ENSGALG00000011405 | 5639,0186  | -0,405273633 | 0,11718169 | -3,4585065 | 0,00054318 | 0,00321538 | SLC4A7  |
| ENSGALG00000002042 | 9110,02017 | -0,405517273 | 0,11009443 | -3,6833588 | 0,00023018 | 0,00154304 |         |
| ENSGALG00000011118 | 5098,98573 | -0,405615226 | 0,11354185 | -3,5723853 | 0,00035374 | 0,00224011 | MIER1   |
| ENSGALG00000004300 | 11426,3375 | -0,405827457 | 0,10825338 | -3,7488663 | 0,00017764 | 0,00123772 | PTDSS2  |
| ENSGALG00000002107 | 25522,2013 | -0,406162719 | 0,10189792 | -3,9859767 | 6,72E-05   | 0,00053042 |         |
| ENSGALG00000011571 | 3230,47914 | -0,406488263 | 0,12109769 | -3,3566972 | 0,00078879 | 0,00440141 | AGPAT4  |
| ENSGALG00000014404 | 9644,71084 | -0,407214942 | 0,11242179 | -3,6222066 | 0,0002921  | 0,00189831 |         |
| ENSGALG00000004001 | 29564,3469 | -0,407260268 | 0,12203749 | -3,3371735 | 0,00084635 | 0,00465015 |         |
| ENSGALG00000000275 | 5245,75511 | -0,407767805 | 0,11961336 | -3,409049  | 0,0006519  | 0,00373771 | KCTD9   |
| ENSGALG00000013661 | 4102,81323 | -0,40778269  | 0,12930218 | -3,1537185 | 0,00161205 | 0,00789496 | MICU3   |
| ENSGALG00000009534 | 2852,25345 | -0,408065762 | 0,12826207 | -3,1814998 | 0,00146515 | 0,00729626 |         |
| ENSGALG00000003143 | 15625,0529 | -0,408123735 | 0,10675451 | -3,8230117 | 0,00013183 | 0,0009527  | ZC3H7A  |
| ENSGALG00000001616 | 13431,8281 | -0,408530697 | 0,10735755 | -3,8053281 | 0,00014162 | 0,00101479 | CDC45   |
| ENSGALG00000003995 | 3806,36291 | -0,408610387 | 0,12214717 | -3,3452299 | 0,00082214 | 0,00453545 | ERAL1   |

|                    |            |              |            |            |            |            |          |
|--------------------|------------|--------------|------------|------------|------------|------------|----------|
| ENSGALG00000011100 | 3743,98602 | -0,408960809 | 0,12437236 | -3,2881968 | 0,00100831 | 0,00536886 |          |
| ENSGALG00000008523 | 12531,5109 | -0,409027447 | 0,10500568 | -3,8952888 | 9,81E-05   | 0,00073778 | XPNPEP1  |
| ENSGALG00000012607 | 5903,92354 | -0,409282973 | 0,12766873 | -3,20582   | 0,00134678 | 0,0068343  | ZCCHC6   |
| ENSGALG00000009483 | 9325,77474 | -0,409303762 | 0,10929848 | -3,7448259 | 0,00018052 | 0,0012537  | MARK1    |
| ENSGALG00000013858 | 2841,13225 | -0,410414198 | 0,12330011 | -3,3285793 | 0,0008729  | 0,00477675 |          |
| ENSGALG00000002673 | 4173,32355 | -0,41052388  | 0,11457704 | -3,5829508 | 0,00033973 | 0,00216448 | GRPEL2   |
| ENSGALG00000016345 | 4179,81268 | -0,410542245 | 0,1255035  | -3,2711616 | 0,00107107 | 0,00566094 | KLHL15   |
| ENSGALG00000006404 | 23302,9151 | -0,411265326 | 0,10229476 | -4,020395  | 5,81E-05   | 0,00046863 | DDX46    |
| ENSGALG00000011662 | 25762,1153 | -0,412100057 | 0,1171723  | -3,5170434 | 0,00043638 | 0,00267027 |          |
| ENSGALG00000006157 | 6346,9334  | -0,412112134 | 0,11052549 | -3,7286613 | 0,0001925  | 0,00132315 |          |
| ENSGALG00000000780 | 20148,9101 | -0,413093901 | 0,1091845  | -3,7834483 | 0,00015467 | 0,00109565 |          |
| ENSGALG00000010734 | 12330,7124 | -0,413140268 | 0,11515498 | -3,5876892 | 0,00033362 | 0,00213052 | PPP4R3A  |
| ENSGALG00000027373 | 11590,4668 | -0,413207621 | 0,12758753 | -3,2386208 | 0,00120109 | 0,00622289 |          |
| ENSGALG00000014811 | 9624,08099 | -0,413279775 | 0,10683153 | -3,8685189 | 0,0001095  | 0,00081033 | SMCHD1   |
| ENSGALG00000009300 | 6311,47255 | -0,413699825 | 0,11749092 | -3,5211215 | 0,00042973 | 0,0026439  | NUMB     |
| ENSGALG00000014978 | 5258,7361  | -0,41400107  | 0,1181716  | -3,5033889 | 0,00045938 | 0,00279153 |          |
| ENSGALG00000004947 | 6549,15547 | -0,414737624 | 0,12292028 | -3,3740375 | 0,00074074 | 0,00416572 | POLR3A   |
| ENSGALG00000001613 | 28424,6252 | -0,414922322 | 0,10503517 | -3,9503179 | 7,80E-05   | 0,0006041  | GNL3     |
| ENSGALG00000013943 | 3049,80064 | -0,414996341 | 0,12653671 | -3,2796518 | 0,00103935 | 0,00551258 |          |
| ENSGALG00000012241 | 2635,25809 | -0,415005332 | 0,12984246 | -3,1962221 | 0,0013924  | 0,0070187  | KLHDC1   |
| ENSGALG00000027593 | 7745,80903 | -0,415214085 | 0,12333575 | -3,3665347 | 0,00076119 | 0,00426837 |          |
| ENSGALG00000000800 | 3898,75043 | -0,415275292 | 0,12002346 | -3,4599509 | 0,00054027 | 0,00320097 |          |
| ENSGALG00000009634 | 10679,8347 | -0,415471196 | 0,1072605  | -3,8734781 | 0,00010729 | 0,00079659 | GFM1     |
| ENSGALG00000016972 | 5736,72836 | -0,415815188 | 0,11849243 | -3,5092131 | 0,00044943 | 0,00274028 | NUFIP1   |
| ENSGALG00000026470 | 13532,2225 | -0,41655555  | 0,11205019 | -3,7175802 | 0,00020114 | 0,00136995 | BOD1L1   |
| ENSGALG00000003737 | 3492,31762 | -0,417242803 | 0,13295765 | -3,1381631 | 0,0017001  | 0,00824613 |          |
| ENSGALG00000014386 | 4214,12952 | -0,417751127 | 0,12151585 | -3,4378325 | 0,00058639 | 0,00342208 | SEPSECS  |
| ENSGALG00000014013 | 11695,5327 | -0,418753457 | 0,10545846 | -3,9707907 | 7,16E-05   | 0,00056246 |          |
| ENSGALG00000015132 | 49891,3971 | -0,418923213 | 0,10073836 | -4,1585273 | 3,20E-05   | 0,00028099 | CDH2     |
| ENSGALG00000004121 | 4190,99049 | -0,419252057 | 0,12228908 | -3,4283687 | 0,00060722 | 0,00353303 | LPAR4    |
| ENSGALG00000009961 | 27537,6751 | -0,419402034 | 0,1063815  | -3,9424339 | 8,07E-05   | 0,0006229  | RLI      |
| ENSGALG00000010201 | 4830,06159 | -0,41947829  | 0,13602431 | -3,0838479 | 0,00204342 | 0,0096134  | ABHD18   |
| ENSGALG00000019228 | 2351,71501 | -0,419863222 | 0,13563777 | -3,0954741 | 0,00196499 | 0,00930225 | SFT2D2   |
| ENSGALG00000007227 | 17010,7893 | -0,420130207 | 0,12508196 | -3,3588394 | 0,00078271 | 0,0043764  | MSI1     |
| ENSGALG00000000975 | 4091,69565 | -0,420207875 | 0,11994528 | -3,5033297 | 0,00045948 | 0,00279153 |          |
| ENSGALG00000003985 | 6692,40436 | -0,42022626  | 0,11526594 | -3,6457107 | 0,00026665 | 0,00175048 | TARSL2   |
| ENSGALG00000007736 | 8209,23878 | -0,420323444 | 0,11023063 | -3,8131273 | 0,00013722 | 0,0009872  |          |
| ENSGALG00000008989 | 27837,9247 | -0,420708851 | 0,10920494 | -3,852471  | 0,00011693 | 0,00085547 |          |
| ENSGALG00000017119 | 1864,30027 | -0,420708881 | 0,13656883 | -3,0805629 | 0,0020661  | 0,00969881 | TNFRSF19 |
| ENSGALG00000010630 | 14099,6    | -0,420914921 | 0,11268105 | -3,7354544 | 0,00018738 | 0,00129256 | AHCTF1   |
| ENSGALG00000004310 | 3386,86871 | -0,4211147   | 0,1211839  | -3,4750055 | 0,00051084 | 0,00304916 | TTYH3    |
| ENSGALG00000010671 | 83381,23   | -0,421121888 | 0,1031007  | -4,0845686 | 4,42E-05   | 0,00036794 | HNRNPU   |
| ENSGALG00000008466 | 2872,73209 | -0,421406429 | 0,13329064 | -3,1615605 | 0,00156926 | 0,00773552 |          |
| ENSGALG00000014937 | 3129,4872  | -0,421603891 | 0,12557883 | -3,3572847 | 0,00078712 | 0,00439447 | KPNA5    |
| ENSGALG00000018803 | 3405,63382 | -0,421885923 | 0,12639678 | -3,3377901 | 0,00084448 | 0,00464172 |          |
| ENSGALG00000015692 | 1953,56891 | -0,422243248 | 0,13365312 | -3,1592472 | 0,00158177 | 0,00777748 | POLN     |
| ENSGALG00000013607 | 7250,98124 | -0,422561681 | 0,11201001 | -3,7725349 | 0,0001616  | 0,0011382  |          |
| ENSGALG00000006002 | 2601,77756 | -0,422978689 | 0,1302324  | -3,247876  | 0,0011627  | 0,00605359 | WHAMM    |
| ENSGALG00000002763 | 8455,88563 | -0,423193935 | 0,11582995 | -3,6535794 | 0,00025861 | 0,00170672 | FRZB     |
| ENSGALG00000000962 | 2645,42242 | -0,423212428 | 0,12644055 | -3,3471258 | 0,00081654 | 0,00451002 | PUS3     |
| ENSGALG00000008708 | 9031,55021 | -0,423296325 | 0,10630235 | -3,9820033 | 6,83E-05   | 0,00053843 |          |
| ENSGALG00000014568 | 6675,25211 | -0,423460012 | 0,11373368 | -3,7232595 | 0,00019667 | 0,00134486 |          |
| ENSGALG00000001850 | 22801,4935 | -0,423798382 | 0,1070003  | -3,9607213 | 7,47E-05   | 0,00058168 | RARS     |
| ENSGALG00000016701 | 2038,86851 | -0,423807866 | 0,1319527  | -3,2118167 | 0,00131899 | 0,00671829 |          |
| ENSGALG00000003288 | 22428,6978 | -0,423843105 | 0,12398262 | -3,4185687 | 0,00062951 | 0,00363171 | TARS     |
| ENSGALG00000009177 | 7539,35878 | -0,423896895 | 0,11006703 | -3,8512612 | 0,00011751 | 0,00085924 | FMR1     |
| ENSGALG00000012852 | 33011,4945 | -0,42431457  | 0,11899849 | -3,5657139 | 0,00036287 | 0,00228618 | MKRN1    |
| ENSGALG00000002288 | 13379,2923 | -0,424413539 | 0,10575851 | -4,0130439 | 5,99E-05   | 0,0004809  | LIG3     |
| ENSGALG00000011177 | 6032,23061 | -0,424449663 | 0,11472261 | -3,699791  | 0,00021578 | 0,00146014 | CEP290   |
| ENSGALG00000005945 | 41976,0293 | -0,425016747 | 0,10489477 | -4,0518393 | 5,08E-05   | 0,00041729 |          |
| ENSGALG00000002119 | 6930,58517 | -0,425364527 | 0,1209038  | -3,5182064 | 0,00043447 | 0,00266338 | C16orf62 |
| ENSGALG00000000033 | 3918,69493 | -0,425866952 | 0,12660413 | -3,3637683 | 0,00076886 | 0,00430606 |          |

|                    |            |              |            |            |            |            |          |
|--------------------|------------|--------------|------------|------------|------------|------------|----------|
| ENSGALG00000004181 | 1761,48747 | -0,425938272 | 0,13751656 | -3,0973599 | 0,00195253 | 0,00925292 |          |
| ENSGALG00000016911 | 5511,46419 | -0,426013919 | 0,11550644 | -3,6882267 | 0,00022582 | 0,00151831 | RNF219   |
| ENSGALG00000005205 | 5076,63735 | -0,426364463 | 0,13358149 | -3,191793  | 0,00141393 | 0,00710879 | RNFT1    |
| ENSGALG00000016955 | 4576,70807 | -0,426960619 | 0,13063542 | -3,2683373 | 0,00108181 | 0,00570666 | VWA8     |
| ENSGALG00000008616 | 22133,5216 | -0,427012968 | 0,11420797 | -3,738907  | 0,00018482 | 0,00127734 |          |
| ENSGALG00000004104 | 16560,1522 | -0,427862285 | 0,12883118 | -3,3211081 | 0,00089661 | 0,00488488 | INTS1    |
| ENSGALG00000002262 | 28425,4355 | -0,428265663 | 0,10466808 | -4,0916548 | 4,28E-05   | 0,00035977 | ETF1     |
| ENSGALG00000004776 | 7278,29032 | -0,428490556 | 0,1147583  | -3,7338524 | 0,00018857 | 0,00129865 |          |
| ENSGALG00000012227 | 10485,4738 | -0,428492425 | 0,10916783 | -3,9250796 | 8,67E-05   | 0,00066503 | TSPAN5   |
| ENSGALG00000017111 | 14958,6545 | -0,428517877 | 0,1112294  | -3,8525595 | 0,00011689 | 0,00085547 | NUP58    |
| ENSGALG00000008844 | 4547,72028 | -0,428880605 | 0,13511839 | -3,1741098 | 0,00150297 | 0,00744376 | SLC31A1  |
| ENSGALG00000023571 | 6639,21372 | -0,428973189 | 0,12324229 | -3,4807305 | 0,00050005 | 0,00300183 | TRIM59   |
| ENSGALG00000014953 | 10323,6261 | -0,429472364 | 0,13438161 | -3,1959161 | 0,00139388 | 0,00702134 | RWDD1    |
| ENSGALG00000016454 | 3850,19078 | -0,429504414 | 0,12203619 | -3,5194838 | 0,00043239 | 0,00265657 | E2F6     |
| ENSGALG00000000346 | 4943,52317 | -0,429865287 | 0,11696755 | -3,6750815 | 0,00023777 | 0,00158535 |          |
| ENSGALG00000004133 | 28687,5841 | -0,430003398 | 0,1149324  | -3,7413591 | 0,00018303 | 0,00126815 | SRSF10   |
| ENSGALG00000006730 | 17262,8448 | -0,430049755 | 0,10295568 | -4,1770378 | 2,95E-05   | 0,00026144 |          |
| ENSGALG00000027835 | 5051,56121 | -0,430117051 | 0,11513346 | -3,7358127 | 0,00018711 | 0,00129184 | PCBD1    |
| ENSGALG00000001501 | 5273,66434 | -0,430190725 | 0,11395127 | -3,7752164 | 0,00015987 | 0,0011272  | MAPK1    |
| ENSGALG00000006500 | 13286,4752 | -0,430344251 | 0,11868069 | -3,626068  | 0,00028777 | 0,00187553 |          |
| ENSGALG00000004986 | 14224,0481 | -0,430376609 | 0,11894558 | -3,6182647 | 0,00029658 | 0,00192378 | CERCAM   |
| ENSGALG00000004756 | 2781,91816 | -0,43117271  | 0,12469583 | -3,4577958 | 0,00054461 | 0,0032218  | CEP89    |
| ENSGALG00000015184 | 7792,59624 | -0,431383947 | 0,12288745 | -3,5103988 | 0,00044744 | 0,00273115 |          |
| ENSGALG00000007705 | 251805,658 | -0,431935045 | 0,09889184 | -4,3677523 | 1,26E-05   | 0,00012567 |          |
| ENSGALG00000011555 | 11516,3317 | -0,431962973 | 0,11422487 | -3,7816893 | 0,00015577 | 0,0011017  | QKI      |
| ENSGALG00000014222 | 26624,5153 | -0,431998929 | 0,09984019 | -4,3269043 | 1,51E-05   | 0,00014748 |          |
| ENSGALG00000011013 | 3992,5007  | -0,43257266  | 0,11842255 | -3,6527896 | 0,00025941 | 0,00171115 |          |
| ENSGALG00000008413 | 12232,7391 | -0,432788919 | 0,11510536 | -3,7599371 | 0,00016996 | 0,00119276 |          |
| ENSGALG00000007481 | 6576,27254 | -0,43296248  | 0,10915554 | -3,966473  | 7,29E-05   | 0,00057077 | HACD3    |
| ENSGALG00000006378 | 6236,19115 | -0,43312035  | 0,13117722 | -3,3017955 | 0,00096068 | 0,00517187 |          |
| ENSGALG00000013920 | 7232,43287 | -0,433479079 | 0,1210408  | -3,5812642 | 0,00034194 | 0,00217443 | SUV39H2  |
| ENSGALG00000002877 | 3840,76126 | -0,433897954 | 0,13612607 | -3,1874713 | 0,00143523 | 0,00719463 | LRRC45   |
| ENSGALG00000011548 | 3329,63059 | -0,434202614 | 0,12811304 | -3,3892149 | 0,00070093 | 0,00398296 | PPP1R13B |
| ENSGALG00000010976 | 5423,33644 | -0,434636867 | 0,12461543 | -3,4878255 | 0,00048697 | 0,00293365 | CCDC126  |
| ENSGALG00000009930 | 17651,9175 | -0,434701609 | 0,10108014 | -4,300564  | 1,70E-05   | 0,000163   |          |
| ENSGALG00000006221 | 21172,6562 | -0,434757063 | 0,10200869 | -4,2619612 | 2,03E-05   | 0,00018949 | KIF1A    |
| ENSGALG00000028462 | 7479,58699 | -0,434862527 | 0,12695407 | -3,4253531 | 0,000614   | 0,00356791 |          |
| ENSGALG00000008355 | 3052,82011 | -0,434887931 | 0,13359721 | -3,2552171 | 0,00113306 | 0,0059333  |          |
| ENSGALG00000011543 | 9465,14039 | -0,435034048 | 0,12352777 | -3,521751  | 0,00042871 | 0,00263991 | SDAD1    |
| ENSGALG00000009519 | 11233,6738 | -0,43521067  | 0,10594254 | -4,1079878 | 3,99E-05   | 0,00034005 | ARG2     |
| ENSGALG00000009598 | 50606,5602 | -0,435652779 | 0,12077169 | -3,6072425 | 0,00030947 | 0,00199538 | EPRS     |
| ENSGALG00000006409 | 11343,9424 | -0,436770571 | 0,12587936 | -3,4697554 | 0,00052093 | 0,00310258 |          |
| ENSGALG00000001717 | 40955,9308 | -0,437024576 | 0,1153453  | -3,7888373 | 0,00015135 | 0,00107551 | SLC16A1  |
| ENSGALG00000012680 | 2735,45258 | -0,437301833 | 0,12310563 | -3,5522488 | 0,00038195 | 0,00238436 | E2F3     |
| ENSGALG00000011475 | 4517,36266 | -0,437819648 | 0,12412869 | -3,5271432 | 0,00042007 | 0,00259376 |          |
| ENSGALG00000014375 | 10299,4805 | -0,437825336 | 0,10798758 | -4,0544047 | 5,03E-05   | 0,00041349 |          |
| ENSGALG00000017038 | 6592,44922 | -0,437833021 | 0,13661218 | -3,204934  | 0,00135093 | 0,00685027 | PROSER1  |
| ENSGALG00000012642 | 14397,9617 | -0,437930988 | 0,11769371 | -3,720938  | 0,00019848 | 0,00135573 |          |
| ENSGALG00000008796 | 7379,05533 | -0,438293488 | 0,11574409 | -3,7867461 | 0,00015263 | 0,00108291 |          |
| ENSGALG00000007999 | 6686,69473 | -0,438325223 | 0,11125069 | -3,9399777 | 8,15E-05   | 0,00062871 | MRPS7    |
| ENSGALG00000009448 | 19270,6318 | -0,43880669  | 0,10703455 | -4,0996732 | 4,14E-05   | 0,00035053 | IFRD1    |
| ENSGALG00000008163 | 17633,4055 | -0,439350797 | 0,12629148 | -3,4788633 | 0,00050355 | 0,00301485 | PSME4    |
| ENSGALG00000004522 | 17438,7774 | -0,439397212 | 0,11296651 | -3,8896238 | 0,0001004  | 0,00075272 |          |
| ENSGALG00000005854 | 8969,91159 | -0,439557852 | 0,11347852 | -3,8734895 | 0,00010729 | 0,00079659 | CLUH     |
| ENSGALG00000014870 | 12682,5875 | -0,439767118 | 0,11699794 | -3,7587596 | 0,00017076 | 0,00119653 |          |
| ENSGALG00000009731 | 11305,3134 | -0,439893222 | 0,10611405 | -4,1454759 | 3,39E-05   | 0,00029501 |          |
| ENSGALG00000006427 | 15012,1637 | -0,439960428 | 0,10348    | -4,251647  | 2,12E-05   | 0,00019748 | CARS     |
| ENSGALG00000012497 | 3402,65629 | -0,440007974 | 0,12129309 | -3,6276427 | 0,00028602 | 0,00186503 |          |
| ENSGALG00000022802 | 18215,8301 | -0,44018485  | 0,113024   | -3,8946139 | 9,84E-05   | 0,00073869 |          |
| ENSGALG00000000430 | 10996,8493 | -0,440297246 | 0,11045127 | -3,9863485 | 6,71E-05   | 0,00052989 | SPPL2B   |
| ENSGALG00000007145 | 45254,0897 | -0,440432711 | 0,0991199  | -4,4434336 | 8,85E-06   | 9,27E-05   | ITGB1    |
| ENSGALG00000003071 | 6465,89293 | -0,441229907 | 0,11836541 | -3,7276929 | 0,00019324 | 0,00132563 |          |

|                    |            |              |            |            |            |            |          |
|--------------------|------------|--------------|------------|------------|------------|------------|----------|
| ENSGALG00000015049 | 15802,9479 | -0,441268065 | 0,11099473 | -3,9755768 | 7,02E-05   | 0,00055286 |          |
| ENSGALG00000008988 | 11231,5561 | -0,442984401 | 0,11261589 | -3,933587  | 8,37E-05   | 0,00064373 | ZZZ3     |
| ENSGALG00000006403 | 20700,7028 | -0,442987653 | 0,10779744 | -4,1094449 | 3,97E-05   | 0,00033876 | MESDC2   |
| ENSGALG00000010957 | 23588,3054 | -0,443064247 | 0,10206261 | -4,3411023 | 1,42E-05   | 0,00014017 | USP1     |
| ENSGALG00000020879 | 1971,7439  | -0,443502872 | 0,13705801 | -3,2358771 | 0,0012127  | 0,00627312 | SLC30A7  |
| ENSGALG00000012696 | 9654,978   | -0,443665071 | 0,1168806  | -3,7958828 | 0,00014712 | 0,00104761 |          |
| ENSGALG00000012000 | 7157,91614 | -0,444031788 | 0,10961123 | -4,0509697 | 5,10E-05   | 0,00041817 | METTL14  |
| ENSGALG00000005206 | 7037,81003 | -0,444288079 | 0,11301214 | -3,9313307 | 8,45E-05   | 0,0006489  | ACSL3    |
| ENSGALG00000003861 | 8032,14284 | -0,444434747 | 0,10819238 | -4,1078193 | 3,99E-05   | 0,00034009 | HERC4    |
| ENSGALG00000005241 | 3696,95899 | -0,444802963 | 0,12608477 | -3,5278089 | 0,00041901 | 0,00258842 |          |
| ENSGALG00000029011 | 22651,8846 | -0,444941401 | 0,10030346 | -4,4359527 | 9,17E-06   | 9,53E-05   | SLC35F1  |
| ENSGALG00000026971 | 4341,37635 | -0,445130127 | 0,11930931 | -3,7308917 | 0,0001908  | 0,00131268 | RRAGD    |
| ENSGALG00000007704 | 19378,5947 | -0,445645488 | 0,1426064  | -3,1250034 | 0,00177803 | 0,00854496 |          |
| ENSGALG00000003400 | 9822,18573 | -0,446090625 | 0,10733726 | -4,155972  | 3,24E-05   | 0,0002836  | AIMP2    |
| ENSGALG00000009020 | 9304,45489 | -0,446477137 | 0,11401531 | -3,9159402 | 9,01E-05   | 0,0006861  | JAG1     |
| ENSGALG00000013131 | 1864,58441 | -0,447051346 | 0,13334241 | -3,3526569 | 0,0008004  | 0,00444793 | C18orf21 |
| ENSGALG00000002536 | 10005,1999 | -0,447408092 | 0,11487944 | -3,894588  | 9,84E-05   | 0,00073869 | STX2     |
| ENSGALG00000002863 | 21477,0924 | -0,447764784 | 0,12646631 | -3,5405856 | 0,00039924 | 0,00248203 | ERGIC1   |
| ENSGALG00000007437 | 4980,32711 | -0,447866955 | 0,11297477 | -3,9643095 | 7,36E-05   | 0,00057531 | DPP8     |
| ENSGALG00000010612 | 2716,32593 | -0,44797699  | 0,14444805 | -3,1013018 | 0,00192672 | 0,00914762 | PRKD3    |
| ENSGALG00000016385 | 1906,4631  | -0,448510168 | 0,13792552 | -3,2518287 | 0,00114665 | 0,00599848 | TSSC1    |
| ENSGALG00000011642 | 18424,3446 | -0,448893503 | 0,1458916  | -3,0768974 | 0,00209167 | 0,00980319 | ANKRD17  |
| ENSGALG00000001845 | 10040,8917 | -0,449444654 | 0,10707839 | -4,1973421 | 2,70E-05   | 0,00024254 | PHTF1    |
| ENSGALG00000012568 | 2033,21553 | -0,449796718 | 0,13848137 | -3,2480667 | 0,00116192 | 0,00605185 |          |
| ENSGALG00000006324 | 5540,59909 | -0,450353768 | 0,14477251 | -3,1107684 | 0,00186601 | 0,00888313 |          |
| ENSGALG00000012598 | 6595,51322 | -0,450640697 | 0,12253012 | -3,6777953 | 0,00023526 | 0,00157089 | NAA35    |
| ENSGALG00000002519 | 3426,12944 | -0,450983038 | 0,12415844 | -3,6323189 | 0,00028089 | 0,00183506 | SLC25A33 |
| ENSGALG00000007652 | 11015,3194 | -0,45121126  | 0,11033188 | -4,0895819 | 4,32E-05   | 0,00036185 | SUCLG2   |
| ENSGALG00000005959 | 3317,97301 | -0,451515508 | 0,12097245 | -3,732383  | 0,00018968 | 0,00130559 | GLMN     |
| ENSGALG00000016803 | 4775,60706 | -0,451555414 | 0,13299179 | -3,395363  | 0,00068538 | 0,0039109  | ST6GAL2  |
| ENSGALG00000002663 | 8380,31752 | -0,451591009 | 0,11688065 | -3,8636934 | 0,00011169 | 0,00082355 | ATR      |
| ENSGALG00000007075 | 11514,1233 | -0,451627608 | 0,12690022 | -3,5589189 | 0,00037238 | 0,00233857 | ATP13A3  |
| ENSGALG00000004049 | 11640,7727 | -0,45169714  | 0,10780601 | -4,1899069 | 2,79E-05   | 0,00024948 | ITFG1    |
| ENSGALG00000013233 | 9834,12864 | -0,4517759   | 0,11414632 | -3,9578665 | 7,56E-05   | 0,00058733 |          |
| ENSGALG00000006336 | 7051,08462 | -0,452052929 | 0,12470158 | -3,6250777 | 0,00028887 | 0,00188183 |          |
| ENSGALG00000007659 | 35189,3993 | -0,45246564  | 0,10270533 | -4,4054738 | 1,06E-05   | 0,00010813 | HYOU1    |
| ENSGALG00000008088 | 3813,14193 | -0,452924609 | 0,11705672 | -3,8692748 | 0,00010916 | 0,00080882 | ACSL4    |
| ENSGALG00000008848 | 8858,46011 | -0,453382128 | 0,10839768 | -4,1825813 | 2,88E-05   | 0,00025631 |          |
| ENSGALG00000009835 | 14808,4285 | -0,453500739 | 0,11172389 | -4,0591207 | 4,93E-05   | 0,00040645 | XPOT     |
| ENSGALG00000015458 | 9174,0129  | -0,453606012 | 0,13072342 | -3,4699674 | 0,00052052 | 0,00310149 | ILDR2    |
| ENSGALG00000005840 | 6869,83939 | -0,454270613 | 0,11585326 | -3,9210861 | 8,82E-05   | 0,00067425 | DENND5A  |
| ENSGALG00000006094 | 10694,3183 | -0,454736184 | 0,1116856  | -4,0715741 | 4,67E-05   | 0,00038696 | PHF6     |
| ENSGALG00000004713 | 12581,373  | -0,454819325 | 0,1044249  | -4,355468  | 1,33E-05   | 0,00013206 |          |
| ENSGALG00000005160 | 9338,8368  | -0,454934871 | 0,12551054 | -3,6246746 | 0,00028933 | 0,00188297 | VMP1     |
| ENSGALG00000021883 | 1337,96899 | -0,455471836 | 0,14673539 | -3,1040354 | 0,001909   | 0,00907827 |          |
| ENSGALG00000005489 | 5406,3342  | -0,455551792 | 0,12948295 | -3,5182378 | 0,00043442 | 0,00266338 |          |
| ENSGALG00000016196 | 5946,1092  | -0,455745009 | 0,13219264 | -3,4475824 | 0,00056563 | 0,00332514 |          |
| ENSGALG00000011191 | 11563,8832 | -0,455971006 | 0,10723132 | -4,2522187 | 2,12E-05   | 0,00019721 |          |
| ENSGALG00000008839 | 9872,74847 | -0,456849267 | 0,12866693 | -3,5506348 | 0,0003843  | 0,00239683 |          |
| ENSGALG00000008415 | 6540,80438 | -0,456904989 | 0,11868052 | -3,8498736 | 0,00011818 | 0,00086366 | ALS2     |
| ENSGALG00000000884 | 7194,47798 | -0,456928071 | 0,11254093 | -4,0601057 | 4,91E-05   | 0,00040499 | CXXC5    |
| ENSGALG00000002338 | 29369,7857 | -0,457290151 | 0,14291025 | -3,1998415 | 0,00137503 | 0,00695175 |          |
| ENSGALG00000001179 | 4301,53132 | -0,45735712  | 0,11540169 | -3,9631753 | 7,40E-05   | 0,00057772 |          |
| ENSGALG00000002954 | 6734,12402 | -0,457794297 | 0,12058072 | -3,7965796 | 0,00014671 | 0,00104576 | MBTD1    |
| ENSGALG00000008497 | 15581,4745 | -0,457962816 | 0,11566741 | -3,9593072 | 7,52E-05   | 0,00058414 | SLC38A2  |
| ENSGALG00000007777 | 3900,17866 | -0,45814234  | 0,12874776 | -3,5584491 | 0,00037305 | 0,0023406  | SLC39A10 |
| ENSGALG00000026322 | 5686,93416 | -0,458344915 | 0,11820551 | -3,8775258 | 0,00010552 | 0,00078767 |          |
| ENSGALG00000013647 | 1849,99539 | -0,458404091 | 0,13582178 | -3,3750411 | 0,00073805 | 0,00415399 | TFB1M    |
| ENSGALG00000026639 | 1529,36894 | -0,458562471 | 0,13972096 | -3,2819876 | 0,00103078 | 0,00547351 | SMCO4    |
| ENSGALG00000004531 | 7125,02349 | -0,458962037 | 0,11174171 | -4,1073476 | 4,00E-05   | 0,00034057 | PLOD1    |
| ENSGALG00000007842 | 5019,26998 | -0,459124954 | 0,11745791 | -3,9088467 | 9,27E-05   | 0,0007038  |          |
| ENSGALG00000016930 | 13372,7628 | -0,459461549 | 0,10645494 | -4,3160189 | 1,59E-05   | 0,0001534  | DIS3     |

|                    |            |              |            |            |            |            |           |
|--------------------|------------|--------------|------------|------------|------------|------------|-----------|
| ENSGALG00000008705 | 14944,0116 | -0,4597037   | 0,10963126 | -4,1931808 | 2,75E-05   | 0,00024622 |           |
| ENSGALG00000015773 | 9016,27354 | -0,459782065 | 0,10646265 | -4,318717  | 1,57E-05   | 0,00015208 |           |
| ENSGALG00000008482 | 22772,2201 | -0,459855147 | 0,11052584 | -4,1606122 | 3,17E-05   | 0,00027898 | STAG2     |
| ENSGALG00000010411 | 14781,2197 | -0,460452211 | 0,1181671  | -3,8966194 | 9,75E-05   | 0,00073496 | RNF13     |
| ENSGALG00000002501 | 3377,42917 | -0,46100497  | 0,12275816 | -3,7553917 | 0,00017307 | 0,00121087 |           |
| ENSGALG00000006281 | 5170,2004  | -0,461106682 | 0,11489632 | -4,0132414 | 5,99E-05   | 0,00048078 |           |
| ENSGALG00000006078 | 2849,4853  | -0,461126659 | 0,1296477  | -3,5567671 | 0,00037545 | 0,00235237 | PALB2     |
| ENSGALG00000013893 | 1508,86891 | -0,461829974 | 0,1439203  | -3,2089287 | 0,00133231 | 0,00677346 | MNS1      |
| ENSGALG00000015633 | 9547,40157 | -0,462141421 | 0,10577029 | -4,3692935 | 1,25E-05   | 0,00012525 |           |
| ENSGALG00000016980 | 3122,81674 | -0,462357479 | 0,12582273 | -3,6746738 | 0,00023815 | 0,00158711 | COG3      |
| ENSGALG00000013136 | 2283,14809 | -0,462408191 | 0,13185399 | -3,5069714 | 0,00045324 | 0,00275976 |           |
| ENSGALG00000000687 | 3686,83705 | -0,462411333 | 0,12645225 | -3,6568058 | 0,00025538 | 0,00168785 |           |
| ENSGALG00000016445 | 7095,59053 | -0,463408352 | 0,11403536 | -4,0637251 | 4,83E-05   | 0,000399   | NOL10     |
| ENSGALG00000009899 | 35232,7937 | -0,46345514  | 0,10855368 | -4,2693637 | 1,96E-05   | 0,00018445 |           |
| ENSGALG00000011794 | 10368,9097 | -0,463824908 | 0,11474911 | -4,0420785 | 5,30E-05   | 0,00043291 | DDX47     |
| ENSGALG00000007057 | 3861,26178 | -0,46473909  | 0,12088959 | -3,8443267 | 0,00012088 | 0,0008806  | LRRC28    |
| ENSGALG00000012655 | 11727,4649 | -0,4651119   | 0,10973943 | -4,2383297 | 2,25E-05   | 0,00020772 | POLR3B    |
| ENSGALG00000015138 | 14137,444  | -0,465157078 | 0,12418565 | -3,7456587 | 0,00017992 | 0,00125045 |           |
| ENSGALG00000002942 | 14672,6332 | -0,465828236 | 0,13435921 | -3,4670361 | 0,00052623 | 0,0031314  | JMJD1C    |
| ENSGALG00000014217 | 2291,12491 | -0,46602463  | 0,13899423 | -3,3528343 | 0,00079989 | 0,0044469  |           |
| ENSGALG00000010054 | 3266,33312 | -0,466429533 | 0,12708508 | -3,6702148 | 0,00024235 | 0,00161268 |           |
| ENSGALG00000004158 | 2874,23978 | -0,467330867 | 0,12292142 | -3,8018669 | 0,00014361 | 0,00102584 |           |
| ENSGALG00000028849 | 26828,63   | -0,467375912 | 0,11688987 | -3,9984296 | 6,38E-05   | 0,0005068  | SCAF11    |
| ENSGALG00000011309 | 5857,33759 | -0,467663025 | 0,12262631 | -3,8137249 | 0,00013689 | 0,00098656 | PLXNC1    |
| ENSGALG00000013728 | 12921,1551 | -0,467853342 | 0,10806143 | -4,3295129 | 1,49E-05   | 0,00014648 | PPAT      |
| ENSGALG00000013765 | 8392,68097 | -0,468026469 | 0,11553655 | -4,0508954 | 5,10E-05   | 0,00041817 |           |
| ENSGALG00000002282 | 2493,12249 | -0,468163907 | 0,13046007 | -3,5885608 | 0,00033251 | 0,0021254  | TMEM200A  |
| ENSGALG00000000895 | 27062,2913 | -0,468166268 | 0,11013528 | -4,2508292 | 2,13E-05   | 0,00019793 | NUDC      |
| ENSGALG00000002655 | 6693,97945 | -0,468798244 | 0,13255859 | -3,5365361 | 0,00040541 | 0,00251466 | ITGAV     |
| ENSGALG00000006121 | 11011,1981 | -0,468808823 | 0,11657303 | -4,0215891 | 5,78E-05   | 0,00046653 | PIK3C2A   |
| ENSGALG00000011232 | 2855,76217 | -0,469477808 | 0,12392263 | -3,7884753 | 0,00015157 | 0,00107652 |           |
| ENSGALG00000006638 | 2375,89839 | -0,469621749 | 0,13927345 | -3,3719401 | 0,00074641 | 0,00419411 | GRIK4     |
| ENSGALG00000009954 | 1375,37198 | -0,469791805 | 0,14501118 | -3,2396936 | 0,00119658 | 0,00620391 | DYNC2LI1  |
| ENSGALG00000007058 | 9479,72971 | -0,469857249 | 0,10779741 | -4,3587065 | 1,31E-05   | 0,00013031 | LSG1      |
| ENSGALG00000011101 | 5741,10347 | -0,47005983  | 0,1114966  | -4,2159117 | 2,49E-05   | 0,00022671 | URB2      |
| ENSGALG00000000843 | 7211,68859 | -0,471124949 | 0,14308635 | -3,2925919 | 0,00099268 | 0,00530016 | DOT1L     |
| ENSGALG00000011246 | 5026,82702 | -0,471179653 | 0,11657189 | -4,0419664 | 5,30E-05   | 0,00043291 |           |
| ENSGALG00000007564 | 1255,86877 | -0,471313446 | 0,14906226 | -3,1618562 | 0,00156767 | 0,00773047 |           |
| ENSGALG00000016836 | 6379,66167 | -0,471449962 | 0,11875041 | -3,9700911 | 7,18E-05   | 0,00056355 | TUBGCP3   |
| ENSGALG00000002439 | 1784,31098 | -0,471657703 | 0,15336793 | -3,0753347 | 0,00210266 | 0,00985127 |           |
| ENSGALG00000000721 | 4145,80621 | -0,47173717  | 0,14279654 | -3,3035616 | 0,00095465 | 0,00514755 | SLC41A1   |
| ENSGALG00000008837 | 13730,8475 | -0,471745405 | 0,10804461 | -4,3662094 | 1,26E-05   | 0,00012637 | PELI1     |
| ENSGALG00000026412 | 3599,37504 | -0,471881516 | 0,13799409 | -3,4195778 | 0,00062718 | 0,00362134 |           |
| ENSGALG00000016195 | 2664,10393 | -0,472549861 | 0,14052256 | -3,3628042 | 0,00077155 | 0,00431935 |           |
| ENSGALG00000004228 | 2475,78192 | -0,472593441 | 0,12611515 | -3,747317  | 0,00017874 | 0,00124475 | USP40     |
| ENSGALG00000012647 | 9993,64528 | -0,472701385 | 0,12593301 | -3,7535939 | 0,00017432 | 0,00121772 | RFX4      |
| ENSGALG00000001627 | 4772,90031 | -0,472962819 | 0,1154681  | -4,0960473 | 4,20E-05   | 0,00035452 |           |
| ENSGALG00000026192 | 2515,18021 | -0,473341595 | 0,1470736  | -3,2183994 | 0,00128908 | 0,00660055 | ST8SIA4   |
| ENSGALG00000028267 | 15487,1518 | -0,473386218 | 0,11459396 | -4,1309877 | 3,61E-05   | 0,00031165 |           |
| ENSGALG00000006296 | 11149,2649 | -0,47366212  | 0,10934983 | -4,3316217 | 1,48E-05   | 0,0001453  |           |
| ENSGALG00000004055 | 3994,96157 | -0,474043343 | 0,11949327 | -3,9671132 | 7,27E-05   | 0,00056956 | C7orf50   |
| ENSGALG00000027440 | 2934,02695 | -0,474361212 | 0,12732099 | -3,7257111 | 0,00019477 | 0,0013332  |           |
| ENSGALG00000004889 | 8112,95247 | -0,474641509 | 0,1093142  | -4,3419931 | 1,41E-05   | 0,00013971 | SLC2A1    |
| ENSGALG00000005211 | 6813,79977 | -0,474686708 | 0,11553568 | -4,1085724 | 3,98E-05   | 0,00033962 |           |
| ENSGALG00000010182 | 7219,05659 | -0,474781283 | 0,11239386 | -4,2242636 | 2,40E-05   | 0,00021949 | SLC29A1   |
| ENSGALG00000015925 | 3585,11623 | -0,475263897 | 0,12827839 | -3,7049413 | 0,00021144 | 0,00143436 |           |
| ENSGALG00000026989 | 16347,2783 | -0,47543634  | 0,12391447 | -3,8368104 | 0,00012464 | 0,00090555 | HOXA7     |
| ENSGALG00000002783 | 1895,83684 | -0,475653855 | 0,15057219 | -3,1589755 | 0,00158325 | 0,00778022 |           |
| ENSGALG00000016409 | 21993,092  | -0,475709899 | 0,1119047  | -4,2510269 | 2,13E-05   | 0,00019789 | KIDINS220 |
| ENSGALG00000008686 | 2315,39071 | -0,476496754 | 0,12925913 | -3,6863683 | 0,00022748 | 0,00152868 | TRDMT1    |
| ENSGALG00000006906 | 7509,2168  | -0,477103418 | 0,10793556 | -4,4202615 | 9,86E-06   | 0,0001016  | CHM       |
| ENSGALG00000009841 | 1397,50609 | -0,477667905 | 0,15523553 | -3,0770527 | 0,00209058 | 0,00980319 | FASTKD1   |



|                    |            |              |            |            |            |            |          |
|--------------------|------------|--------------|------------|------------|------------|------------|----------|
| ENSGALG00000011342 | 3208,67383 | -0,478233256 | 0,14250555 | -3,3558921 | 0,00079109 | 0,00441063 | FGD6     |
| ENSGALG00000002045 | 30343,4023 | -0,478318973 | 0,09981877 | -4,7918739 | 1,65E-06   | 2,05E-05   |          |
| ENSGALG00000002460 | 17009,9997 | -0,480154381 | 0,10514203 | -4,5667216 | 4,95E-06   | 5,50E-05   |          |
| ENSGALG00000002862 | 5434,26011 | -0,480739106 | 0,11106412 | -4,3284827 | 1,50E-05   | 0,00014706 |          |
| ENSGALG00000012484 | 32855,9599 | -0,4809575   | 0,12116285 | -3,969513  | 7,20E-05   | 0,00056451 | RIF1     |
| ENSGALG00000010884 | 11252,8159 | -0,481115067 | 0,11488944 | -4,1876351 | 2,82E-05   | 0,00025182 | DDX24    |
| ENSGALG00000015901 | 15729,8858 | -0,481643321 | 0,10542744 | -4,5684816 | 4,91E-06   | 5,46E-05   | SENP6    |
| ENSGALG00000023516 | 18924,6811 | -0,48179177  | 0,1052391  | -4,578068  | 4,69E-06   | 5,25E-05   |          |
| ENSGALG00000002294 | 3404,11815 | -0,482168758 | 0,12824623 | -3,7597109 | 0,00017011 | 0,00119322 | SEMA6A   |
| ENSGALG00000003078 | 20488,0185 | -0,483195985 | 0,10630098 | -4,5455457 | 5,48E-06   | 5,97E-05   | MMD      |
| ENSGALG00000008765 | 5344,75739 | -0,483352119 | 0,12788071 | -3,779711  | 0,00015701 | 0,00110992 | C1D      |
| ENSGALG00000005134 | 3683,92085 | -0,483437706 | 0,1457126  | -3,3177481 | 0,00090746 | 0,00493612 | ZSWIM8   |
| ENSGALG00000009967 | 51604,1361 | -0,483675694 | 0,10307537 | -4,6924466 | 2,70E-06   | 3,17E-05   | LRPPRC   |
| ENSGALG00000012702 | 17854,6411 | -0,483830731 | 0,11942579 | -4,0513085 | 5,09E-05   | 0,00041799 | JARID2   |
| ENSGALG00000015830 | 24016,1217 | -0,484314141 | 0,10300764 | -4,7017304 | 2,58E-06   | 3,04E-05   | SYNCRIP  |
| ENSGALG00000004887 | 17300,5109 | -0,484420703 | 0,10687429 | -4,5326215 | 5,83E-06   | 6,30E-05   |          |
| ENSGALG00000002781 | 17608,1718 | -0,484707648 | 0,12726008 | -3,8087958 | 0,00013965 | 0,00100278 |          |
| ENSGALG00000001950 | 14346,8445 | -0,484721287 | 0,11288002 | -4,2941281 | 1,75E-05   | 0,0001671  | PMPCA    |
| ENSGALG00000001777 | 2307,31017 | -0,484938734 | 0,14695286 | -3,2999612 | 0,00096698 | 0,00519347 | MFSD11   |
| ENSGALG00000002198 | 1337,36066 | -0,485078535 | 0,14899049 | -3,2557685 | 0,00113086 | 0,00592407 | FHOD1    |
| ENSGALG00000004416 | 1683,22849 | -0,485858255 | 0,14199597 | -3,4216342 | 0,00062246 | 0,00359944 | TTC19    |
| ENSGALG00000012258 | 6299,78758 | -0,485912726 | 0,11533315 | -4,2131229 | 2,52E-05   | 0,00022876 |          |
| ENSGALG00000013745 | 3956,92601 | -0,486562498 | 0,1295758  | -3,7550415 | 0,00017331 | 0,00121132 | RTTN     |
| ENSGALG00000008862 | 12336,5298 | -0,486712741 | 0,10633346 | -4,5772303 | 4,71E-06   | 5,26E-05   | DNAJC10  |
| ENSGALG00000008670 | 2394,2538  | -0,486758564 | 0,13455087 | -3,6176545 | 0,00029728 | 0,00192648 |          |
| ENSGALG00000009157 | 10495,9323 | -0,48696748  | 0,11167801 | -4,36046   | 1,30E-05   | 0,00012946 |          |
| ENSGALG00000002906 | 23481,0393 | -0,487686151 | 0,1087191  | -4,4857451 | 7,27E-06   | 7,71E-05   |          |
| ENSGALG00000005198 | 7882,46709 | -0,488262054 | 0,11634671 | -4,1966123 | 2,71E-05   | 0,00024316 | RPS6KB1  |
| ENSGALG00000004750 | 7577,76657 | -0,488295007 | 0,10928295 | -4,4681721 | 7,89E-06   | 8,32E-05   | NOL8     |
| ENSGALG00000010570 | 52092,719  | -0,488515596 | 0,10051531 | -4,8601111 | 1,17E-06   | 1,51E-05   | BTF3L4   |
| ENSGALG00000016909 | 4324,69907 | -0,488526858 | 0,11625721 | -4,2021211 | 2,64E-05   | 0,00023858 | NDFIP2   |
| ENSGALG00000004638 | 3370,76137 | -0,48870476  | 0,14148157 | -3,4541939 | 0,00055194 | 0,00325875 |          |
| ENSGALG00000001036 | 9684,70052 | -0,488799588 | 0,1105545  | -4,4213448 | 9,81E-06   | 0,00010117 | ELAC2    |
| ENSGALG00000009981 | 1405,74497 | -0,49003231  | 0,14652981 | -3,3442499 | 0,00082505 | 0,00454598 | PREPL    |
| ENSGALG00000010638 | 13156,3134 | -0,49033693  | 0,12087564 | -4,0565407 | 4,98E-05   | 0,00041072 | CASP3    |
| ENSGALG00000006252 | 14647,7489 | -0,49037706  | 0,13939868 | -3,5178027 | 0,00043514 | 0,00266623 | LMO4     |
| ENSGALG00000000272 | 5267,8402  | -0,490419343 | 0,13544359 | -3,6208384 | 0,00029365 | 0,00190591 |          |
| ENSGALG00000008553 | 5356,62728 | -0,490452503 | 0,13463719 | -3,6427714 | 0,00026972 | 0,00176719 | INO80    |
| ENSGALG00000016404 | 5806,16288 | -0,492286998 | 0,11929847 | -4,1265157 | 3,68E-05   | 0,00031657 |          |
| ENSGALG00000010335 | 1726,88898 | -0,492481433 | 0,14371477 | -3,4267976 | 0,00061074 | 0,0035505  |          |
| ENSGALG00000002141 | 14007,0584 | -0,492600599 | 0,10621413 | -4,6378068 | 3,52E-06   | 4,03E-05   | UGGT1    |
| ENSGALG00000008871 | 16063,5897 | -0,492812674 | 0,13495076 | -3,6517962 | 0,00026041 | 0,00171613 |          |
| ENSGALG00000015059 | 7575,55005 | -0,49315511  | 0,1131114  | -4,3599064 | 1,30E-05   | 0,00012969 |          |
| ENSGALG00000005652 | 5954,57786 | -0,493244478 | 0,11326504 | -4,3547812 | 1,33E-05   | 0,0001323  |          |
| ENSGALG00000023576 | 3299,29916 | -0,493564294 | 0,12078163 | -4,0864186 | 4,38E-05   | 0,0003657  | PIM3     |
| ENSGALG00000008798 | 4574,76494 | -0,493864419 | 0,11829778 | -4,1747565 | 2,98E-05   | 0,0002639  | ZMYND19  |
| ENSGALG00000020742 | 13114,1447 | -0,493871262 | 0,13939629 | -3,5429299 | 0,00039571 | 0,0024612  | PPRC1    |
| ENSGALG00000011962 | 7036,62107 | -0,494326456 | 0,13488463 | -3,6648093 | 0,00024752 | 0,00164472 |          |
| ENSGALG00000015478 | 5554,56829 | -0,494614804 | 0,13028443 | -3,796423  | 0,0001468  | 0,00104588 |          |
| ENSGALG00000007326 | 7076,35907 | -0,494698301 | 0,1094474  | -4,5199637 | 6,19E-06   | 6,66E-05   | PMM2     |
| ENSGALG00000005683 | 5447,0767  | -0,494902817 | 0,11790098 | -4,1976141 | 2,70E-05   | 0,00024241 | ARHGAP29 |
| ENSGALG00000000795 | 1504,93647 | -0,495778483 | 0,1425043  | -3,4790423 | 0,00050321 | 0,00301416 | MFSD12   |
| ENSGALG00000004273 | 11441,3705 | -0,495936282 | 0,1511882  | -3,2802578 | 0,00103712 | 0,00550504 | RALGPS2  |
| ENSGALG00000014998 | 1987,96101 | -0,495971981 | 0,15420457 | -3,2163248 | 0,00129844 | 0,00664345 |          |
| ENSGALG00000015684 | 4408,68885 | -0,496145153 | 0,11398344 | -4,3527826 | 1,34E-05   | 0,00013339 |          |
| ENSGALG00000004570 | 5026,79729 | -0,496270556 | 0,13511313 | -3,6730002 | 0,00023972 | 0,00159598 | NCOA3    |
| ENSGALG00000013257 | 123007,221 | -0,496798558 | 0,10262669 | -4,8408318 | 1,29E-06   | 1,64E-05   |          |
| ENSGALG00000027635 | 9027,18129 | -0,49702612  | 0,11896336 | -4,1779765 | 2,94E-05   | 0,00026087 | NME3     |
| ENSGALG00000003596 | 25796,9116 | -0,497856616 | 0,162082   | -3,0716343 | 0,0021289  | 0,00994712 | TRRAP    |
| ENSGALG00000010624 | 9648,37586 | -0,498764877 | 0,10861449 | -4,5920656 | 4,39E-06   | 4,91E-05   | MEMO1    |
| ENSGALG00000026865 | 1245,99167 | -0,49909443  | 0,16196027 | -3,0815855 | 0,00205901 | 0,00967338 | XRCC2    |
| ENSGALG00000007691 | 3206,91346 | -0,499115113 | 0,12945293 | -3,8555722 | 0,00011546 | 0,00084651 | ARMC9    |

|                     |            |              |            |            |            |            |          |
|---------------------|------------|--------------|------------|------------|------------|------------|----------|
| ENSGALG00000007155  | 2000,50129 | -0,499370494 | 0,14915389 | -3,3480218 | 0,00081391 | 0,00449729 | RMI2     |
| ENSGALG00000003874  | 8943,2552  | -0,499635075 | 0,10978836 | -4,5508931 | 5,34E-06   | 5,87E-05   |          |
| ENSGALG00000005695  | 3266,30309 | -0,500082186 | 0,13148632 | -3,803302  | 0,00014278 | 0,00102045 | CHEK2    |
| ENSGALG000000025792 | 3188,10638 | -0,500292681 | 0,12184936 | -4,1058293 | 4,03E-05   | 0,0003426  | FRRS1L   |
| ENSGALG000000011264 | 1925,3077  | -0,500518992 | 0,14795759 | -3,3828544 | 0,00071737 | 0,00406279 |          |
| ENSGALG000000016758 | 1465,78964 | -0,5005603   | 0,14656111 | -3,4153691 | 0,00063696 | 0,00366533 | LIPT1    |
| ENSGALG000000010716 | 5501,72957 | -0,50085931  | 0,11885573 | -4,2140106 | 2,51E-05   | 0,00022817 | AGA      |
| ENSGALG00000009269  | 3597,54557 | -0,501724842 | 0,13020726 | -3,8532784 | 0,00011655 | 0,00085403 | PTGR2    |
| ENSGALG000000011857 | 24467,2306 | -0,502240381 | 0,10517202 | -4,775418  | 1,79E-06   | 2,19E-05   |          |
| ENSGALG000000003719 | 6864,04349 | -0,502933526 | 0,135236   | -3,7189322 | 0,00020007 | 0,00136332 |          |
| ENSGALG000000006524 | 12378,2851 | -0,503792354 | 0,10770154 | -4,677671  | 2,90E-06   | 3,38E-05   |          |
| ENSGALG000000016781 | 17546,5065 | -0,504088725 | 0,12484349 | -4,0377654 | 5,40E-05   | 0,00043994 | MAP4K4   |
| ENSGALG000000014922 | 15076,9971 | -0,504425665 | 0,11868898 | -4,2499788 | 2,14E-05   | 0,00019855 | ROCK1    |
| ENSGALG000000004690 | 52340,4796 | -0,504461763 | 0,10076346 | -5,006396  | 5,55E-07   | 7,63E-06   |          |
| ENSGALG000000002728 | 6868,77576 | -0,504726866 | 0,12336417 | -4,0913571 | 4,29E-05   | 0,00035977 | SLC16A3  |
| ENSGALG000000011877 | 4219,79352 | -0,504776099 | 0,12198763 | -4,1379284 | 3,50E-05   | 0,00030411 |          |
| ENSGALG000000005533 | 4875,77262 | -0,504976403 | 0,12223566 | -4,1311708 | 3,61E-05   | 0,0003116  | ZMYM3    |
| ENSGALG000000013209 | 5984,63909 | -0,505418476 | 0,11156134 | -4,5304087 | 5,89E-06   | 6,36E-05   |          |
| ENSGALG000000015252 | 4947,94416 | -0,505578034 | 0,14235024 | -3,5516487 | 0,00038283 | 0,00238871 | ST3GAL6  |
| ENSGALG000000007234 | 4564,3675  | -0,505755971 | 0,11795303 | -4,2877742 | 1,80E-05   | 0,00017099 | CLCN5    |
| ENSGALG000000010034 | 2578,09523 | -0,50624459  | 0,13221838 | -3,8288518 | 0,00012874 | 0,00093236 |          |
| ENSGALG000000003540 | 2816,51357 | -0,506324474 | 0,14263664 | -3,5497505 | 0,0003856  | 0,0024027  | CEP95    |
| ENSGALG000000005992 | 1391,45334 | -0,506625581 | 0,15329789 | -3,3048438 | 0,00095029 | 0,0051298  | PDE8A    |
| ENSGALG000000006935 | 12264,1833 | -0,506724591 | 0,10942458 | -4,6308116 | 3,64E-06   | 4,15E-05   |          |
| ENSGALG000000019867 | 6166,97553 | -0,506841982 | 0,11192678 | -4,5283354 | 5,95E-06   | 6,41E-05   | WDCP     |
| ENSGALG000000008420 | 3322,24803 | -0,507225725 | 0,1221905  | -4,1511061 | 3,31E-05   | 0,00028877 | CAND2    |
| ENSGALG000000009782 | 45976,8535 | -0,507579083 | 0,10626981 | -4,7763242 | 1,79E-06   | 2,18E-05   | NAA15    |
| ENSGALG000000002424 | 2020,65689 | -0,508419582 | 0,16029303 | -3,1718134 | 0,0015149  | 0,0074947  | RECQL5   |
| ENSGALG000000002652 | 8163,31793 | -0,509052755 | 0,13652522 | -3,7286352 | 0,00019252 | 0,00132315 |          |
| ENSGALG000000005509 | 6460,5427  | -0,509428544 | 0,14277078 | -3,5681568 | 0,0003595  | 0,00226707 | DPYD     |
| ENSGALG000000004990 | 1688,4348  | -0,509590179 | 0,1471207  | -3,4637558 | 0,00053269 | 0,00316154 |          |
| ENSGALG000000010735 | 16013,9368 | -0,510060882 | 0,1046006  | -4,8762709 | 1,08E-06   | 1,40E-05   |          |
| ENSGALG000000003628 | 14552,598  | -0,510073233 | 0,14143166 | -3,6064997 | 0,00031036 | 0,00199787 |          |
| ENSGALG000000015787 | 3935,81115 | -0,510253054 | 0,14104041 | -3,6177791 | 0,00029714 | 0,00192647 | RNGTT    |
| ENSGALG000000008778 | 6210,22008 | -0,51039033  | 0,14919074 | -3,4210591 | 0,00062378 | 0,00360473 | SPRED2   |
| ENSGALG000000012135 | 48183,5814 | -0,511735314 | 0,10797482 | -4,7393951 | 2,14E-06   | 2,56E-05   | ATF4     |
| ENSGALG000000017085 | 4116,94944 | -0,511832688 | 0,12507401 | -4,0922387 | 4,27E-05   | 0,00035928 | SLC7A1   |
| ENSGALG000000002709 | 2938,4248  | -0,511853662 | 0,14024529 | -3,6497031 | 0,00026254 | 0,0017285  | MYO1C    |
| ENSGALG000000004621 | 8629,88481 | -0,512109985 | 0,12302965 | -4,1624925 | 3,15E-05   | 0,00027687 | PREX1    |
| ENSGALG000000005278 | 9525,24365 | -0,512823817 | 0,15834712 | -3,2386054 | 0,00120116 | 0,00622289 |          |
| ENSGALG000000014791 | 22071,9343 | -0,513191503 | 0,12375943 | -4,1466861 | 3,37E-05   | 0,00029365 | WDR3     |
| ENSGALG000000009825 | 16041,5695 | -0,51401966  | 0,11051134 | -4,6512843 | 3,30E-06   | 3,80E-05   | SRGAP1   |
| ENSGALG000000001441 | 10679,0004 | -0,514329303 | 0,10523513 | -4,8874299 | 1,02E-06   | 1,33E-05   | UBE2G1   |
| ENSGALG000000026468 | 7333,85705 | -0,514962132 | 0,10964748 | -4,6965248 | 2,65E-06   | 3,11E-05   | CHSY1    |
| ENSGALG000000002646 | 11173,6378 | -0,515104787 | 0,14774595 | -3,4864225 | 0,00048953 | 0,00294777 | FAM171B  |
| ENSGALG000000005653 | 3018,77554 | -0,515161656 | 0,12312595 | -4,1840218 | 2,86E-05   | 0,00025519 | NFKB2    |
| ENSGALG000000011707 | 2975,95888 | -0,516018775 | 0,13531464 | -3,8134734 | 0,00013703 | 0,00098658 |          |
| ENSGALG000000003566 | 2456,14829 | -0,516245691 | 0,13569542 | -3,8044444 | 0,00014212 | 0,00101682 | SMURF2   |
| ENSGALG000000003047 | 12574,6527 | -0,516252465 | 0,13206797 | -3,9089908 | 9,27E-05   | 0,0007038  | SUGP2    |
| ENSGALG000000007527 | 4564,36351 | -0,516973735 | 0,11834809 | -4,3682476 | 1,25E-05   | 0,00012548 | ADARB1   |
| ENSGALG000000012550 | 2418,32562 | -0,517745286 | 0,13904231 | -3,7236527 | 0,00019636 | 0,00134344 | HMOX1    |
| ENSGALG000000009207 | 1636,75887 | -0,518081559 | 0,15117707 | -3,426985  | 0,00061032 | 0,00354957 | TRIM2    |
| ENSGALG000000012207 | 4193,90666 | -0,518404651 | 0,11552573 | -4,4873522 | 7,21E-06   | 7,66E-05   | CCNT2    |
| ENSGALG000000009451 | 10542,6813 | -0,518444547 | 0,1054026  | -4,9187072 | 8,71E-07   | 1,14E-05   | PPID     |
| ENSGALG000000010189 | 6061,82346 | -0,518843565 | 0,11081881 | -4,6819089 | 2,84E-06   | 3,32E-05   |          |
| ENSGALG000000011596 | 8210,15954 | -0,519655791 | 0,1247256  | -4,1663925 | 3,09E-05   | 0,00027306 |          |
| ENSGALG000000006622 | 2389,74327 | -0,520113735 | 0,13317469 | -3,9054999 | 9,40E-05   | 0,00071163 | FRA10AC1 |
| ENSGALG000000014784 | 4045,40608 | -0,520975246 | 0,14051541 | -3,7076021 | 0,00020923 | 0,00142008 | MAST4    |
| ENSGALG000000009992 | 11680,4728 | -0,521017168 | 0,11356065 | -4,588008  | 4,47E-06   | 5,01E-05   | ARHGAP5  |
| ENSGALG000000015889 | 13285,7099 | -0,52134607  | 0,14846895 | -3,5114822 | 0,00044562 | 0,00272187 | PHIP     |
| ENSGALG000000007752 | 6790,46143 | -0,521363763 | 0,1083691  | -4,8110001 | 1,50E-06   | 1,88E-05   | COPS7B   |
| ENSGALG000000005850 | 15672,1065 | -0,521743975 | 0,10948222 | -4,7655589 | 1,88E-06   | 2,29E-05   | FNBP1L   |

|                    |            |              |            |            |            |            |          |
|--------------------|------------|--------------|------------|------------|------------|------------|----------|
| ENSGALG00000012354 | 2395,65855 | -0,521764337 | 0,15908224 | -3,2798402 | 0,00103866 | 0,00551105 |          |
| ENSGALG00000015314 | 12934,4444 | -0,521997148 | 0,10929519 | -4,7760302 | 1,79E-06   | 2,19E-05   | BEND3    |
| ENSGALG00000004397 | 3452,74049 | -0,523035736 | 0,1275508  | -4,1006073 | 4,12E-05   | 0,00034977 | MLXIP    |
| ENSGALG00000012592 | 3142,27379 | -0,523397807 | 0,14066624 | -3,7208488 | 0,00019855 | 0,00135573 | RMI1     |
| ENSGALG00000002487 | 10163,3626 | -0,523537895 | 0,1313011  | -3,9873079 | 6,68E-05   | 0,00052806 | SFSWAP   |
| ENSGALG00000003260 | 9438,41253 | -0,523953501 | 0,11054819 | -4,7395938 | 2,14E-06   | 2,56E-05   | UTP6     |
| ENSGALG00000012720 | 24474,404  | -0,524679114 | 0,11154136 | -4,7038973 | 2,55E-06   | 3,01E-05   | NUP153   |
| ENSGALG00000005425 | 38874,994  | -0,524696803 | 0,11835069 | -4,4334072 | 9,28E-06   | 9,63E-05   | OGT      |
| ENSGALG00000010861 | 2392,2986  | -0,524736464 | 0,13282156 | -3,9506874 | 7,79E-05   | 0,00060351 | OMA1     |
| ENSGALG00000004489 | 1483,19946 | -0,524803254 | 0,14557684 | -3,6049914 | 0,00031216 | 0,00200761 |          |
| ENSGALG00000011770 | 14710,9194 | -0,525890593 | 0,11884576 | -4,4249841 | 9,64E-06   | 9,98E-05   | UMPS     |
| ENSGALG00000002850 | 6570,40738 | -0,526275555 | 0,13474436 | -3,9057334 | 9,39E-05   | 0,00071134 | RASA2    |
| ENSGALG00000023562 | 1492,39213 | -0,526424205 | 0,1608921  | -3,2719084 | 0,00106824 | 0,00564929 |          |
| ENSGALG00000015836 | 3297,85416 | -0,526441345 | 0,13246596 | -3,9741633 | 7,06E-05   | 0,00055575 | CEP162   |
| ENSGALG00000014426 | 14003,0497 | -0,526522361 | 0,12072956 | -4,361172  | 1,29E-05   | 0,00012913 | KPNA1    |
| ENSGALG00000011982 | 5512,8717  | -0,527666168 | 0,14035943 | -3,7593924 | 0,00017033 | 0,00119413 | PDE5     |
| ENSGALG00000011149 | 879,074202 | -0,527681437 | 0,16261977 | -3,2448788 | 0,00117501 | 0,00610367 | PLA2R1   |
| ENSGALG00000008096 | 6070,98948 | -0,528190931 | 0,1247684  | -4,2333711 | 2,30E-05   | 0,00021135 | SUFU     |
| ENSGALG00000008847 | 3493,18836 | -0,528756478 | 0,12631689 | -4,1859522 | 2,84E-05   | 0,00025336 | VPS54    |
| ENSGALG00000013177 | 2545,01825 | -0,528877548 | 0,14123176 | -3,7447493 | 0,00018057 | 0,0012537  | BCAT1    |
| ENSGALG00000017392 | 1036,56961 | -0,528892969 | 0,15858794 | -3,3350138 | 0,00085295 | 0,00468075 | SPDYA    |
| ENSGALG00000012979 | 10526,2614 | -0,528975634 | 0,14809894 | -3,5717718 | 0,00035457 | 0,00224223 |          |
| ENSGALG00000000208 | 3421,17661 | -0,529383362 | 0,13520345 | -3,9154575 | 9,02E-05   | 0,00068709 | MCC      |
| ENSGALG00000004474 | 1133,2959  | -0,529777367 | 0,15342984 | -3,4528967 | 0,0005546  | 0,0032709  | PLEKHF1  |
| ENSGALG00000013203 | 7478,18622 | -0,52983334  | 0,11632258 | -4,5548622 | 5,24E-06   | 5,78E-05   |          |
| ENSGALG00000011419 | 3053,01947 | -0,529859697 | 0,12366202 | -4,2847409 | 1,83E-05   | 0,0001731  | DUSP4    |
| ENSGALG00000010159 | 4422,59589 | -0,529906457 | 0,12230696 | -4,3325945 | 1,47E-05   | 0,00014486 |          |
| ENSGALG00000002974 | 1015,77625 | -0,529999669 | 0,16832703 | -3,1486308 | 0,00164037 | 0,0080164  | SPHKAP   |
| ENSGALG00000002624 | 31172,8318 | -0,530323004 | 0,11239841 | -4,7182429 | 2,38E-06   | 2,82E-05   | BMS1     |
| ENSGALG00000006826 | 4092,14666 | -0,530661584 | 0,1454636  | -3,6480713 | 0,00026422 | 0,00173783 | KLHL25   |
| ENSGALG00000002253 | 1425,48713 | -0,530784268 | 0,14560305 | -3,6454199 | 0,00026696 | 0,00175077 | HEMK1    |
| ENSGALG00000011569 | 5815,29092 | -0,530885029 | 0,12042999 | -4,408246  | 1,04E-05   | 0,000107   | SCYL2    |
| ENSGALG00000003944 | 1246,48403 | -0,531232705 | 0,1600895  | -3,3183482 | 0,00090552 | 0,00492749 | FAM189A1 |
| ENSGALG00000004347 | 6495,16049 | -0,533321296 | 0,11036285 | -4,832435  | 1,35E-06   | 1,70E-05   | NEDD4    |
| ENSGALG00000000891 | 3716,06871 | -0,533422492 | 0,12306892 | -4,3343397 | 1,46E-05   | 0,00014396 | NSUN5    |
| ENSGALG00000015818 | 5198,53941 | -0,53353462  | 0,12660774 | -4,2140758 | 2,51E-05   | 0,00022817 |          |
| ENSGALG00000015448 | 2486,28528 | -0,533672096 | 0,16395778 | -3,2549362 | 0,00113418 | 0,00593689 |          |
| ENSGALG00000008312 | 1844,09907 | -0,534378374 | 0,13847665 | -3,8589783 | 0,00011386 | 0,00083706 | GSAP     |
| ENSGALG00000004506 | 11897,6421 | -0,534405871 | 0,11012391 | -4,8527686 | 1,22E-06   | 1,55E-05   | URI1     |
| ENSGALG00000013085 | 2436,82685 | -0,535478159 | 0,13668214 | -3,9176895 | 8,94E-05   | 0,00068237 | PTPRO    |
| ENSGALG00000008098 | 5171,85115 | -0,536763264 | 0,11526046 | -4,6569592 | 3,21E-06   | 3,70E-05   | NAMPT    |
| ENSGALG00000006856 | 8733,4208  | -0,537151634 | 0,11626332 | -4,6201299 | 3,83E-06   | 4,35E-05   | CD151    |
| ENSGALG00000011024 | 13428,0492 | -0,537183599 | 0,10486491 | -5,122625  | 3,01E-07   | 4,37E-06   | CACHD1   |
| ENSGALG00000010564 | 3014,7883  | -0,537373895 | 0,12339974 | -4,354741  | 1,33E-05   | 0,0001323  | TBCK     |
| ENSGALG00000015360 | 9022,70642 | -0,537653684 | 0,10556349 | -5,0931783 | 3,52E-07   | 5,05E-06   | KIAA1524 |
| ENSGALG00000026253 | 1652,9426  | -0,5379573   | 0,15060806 | -3,5719024 | 0,0003544  | 0,00224216 | TMEM144  |
| ENSGALG00000003705 | 3639,3367  | -0,538250704 | 0,12318514 | -4,3694452 | 1,25E-05   | 0,00012525 | VPS13C   |
| ENSGALG00000012468 | 13779,9504 | -0,538390713 | 0,13666178 | -3,9395852 | 8,16E-05   | 0,00062927 |          |
| ENSGALG00000016440 | 2000,28995 | -0,538612864 | 0,16061769 | -3,3533845 | 0,0007983  | 0,00444169 | KLF11    |
| ENSGALG00000016835 | 6008,91026 | -0,539714594 | 0,14683337 | -3,6756945 | 0,0002372  | 0,00158232 |          |
| ENSGALG00000002873 | 15190,7659 | -0,539979366 | 0,10838996 | -4,9818208 | 6,30E-07   | 8,52E-06   |          |
| ENSGALG00000015701 | 9337,57881 | -0,540112853 | 0,12997092 | -4,1556437 | 3,24E-05   | 0,00028383 |          |
| ENSGALG00000015180 | 15097,1011 | -0,540189844 | 0,11292112 | -4,7837805 | 1,72E-06   | 2,11E-05   | PSAT1    |
| ENSGALG00000001389 | 3052,28108 | -0,540945617 | 0,12602912 | -4,2922273 | 1,77E-05   | 0,00016818 | TTL11    |
| ENSGALG00000015491 | 4074,13394 | -0,541085652 | 0,12196746 | -4,4363116 | 9,15E-06   | 9,53E-05   |          |
| ENSGALG00000012121 | 12053,9223 | -0,541445831 | 0,10454307 | -5,179165  | 2,23E-07   | 3,34E-06   | RCN1     |
| ENSGALG00000013438 | 21891,8795 | -0,541667727 | 0,11204746 | -4,8342706 | 1,34E-06   | 1,69E-05   | TEX10    |
| ENSGALG00000001957 | 8870,63197 | -0,541703645 | 0,13410352 | -4,0394438 | 5,36E-05   | 0,00043733 |          |
| ENSGALG00000016460 | 6190,66257 | -0,541890883 | 0,14841996 | -3,6510648 | 0,00026116 | 0,00172019 |          |
| ENSGALG00000014573 | 17671,9053 | -0,541989088 | 0,11034447 | -4,9117921 | 9,02E-07   | 1,18E-05   | NAT10    |
| ENSGALG00000025884 | 6669,8373  | -0,543082298 | 0,11342421 | -4,7880633 | 1,68E-06   | 2,07E-05   | NABP1    |
| ENSGALG00000007835 | 1738,05901 | -0,543517994 | 0,14833732 | -3,6640679 | 0,00024824 | 0,00164868 | PUS10    |

|                     |            |              |            |            |            |            |           |
|---------------------|------------|--------------|------------|------------|------------|------------|-----------|
| ENSGALG00000006895  | 13372,5266 | -0,543915173 | 0,10588883 | -5,1366627 | 2,80E-07   | 4,09E-06   | CEP131    |
| ENSGALG00000004364  | 7914,97638 | -0,544307466 | 0,11563233 | -4,7072254 | 2,51E-06   | 2,97E-05   | ABR       |
| ENSGALG000000026452 | 7763,72006 | -0,545277299 | 0,13192983 | -4,1330858 | 3,58E-05   | 0,0003098  | MURC      |
| ENSGALG000000012223 | 1554,61989 | -0,545359079 | 0,13992319 | -3,8975604 | 9,72E-05   | 0,00073252 | ZRANB3    |
| ENSGALG000000003440 | 1101,0238  | -0,546469024 | 0,16030168 | -3,4090037 | 0,00065201 | 0,00373771 |           |
| ENSGALG000000011351 | 157820,465 | -0,547374715 | 0,15800979 | -3,4641822 | 0,00053185 | 0,00315791 |           |
| ENSGALG000000016768 | 7527,22871 | -0,54750013  | 0,11986999 | -4,5674497 | 4,94E-06   | 5,48E-05   | LONRF2    |
| ENSGALG000000009503 | 5606,80387 | -0,547842813 | 0,11865192 | -4,6172267 | 3,89E-06   | 4,41E-05   | RAB3GAP2  |
| ENSGALG000000015746 | 3303,51188 | -0,547863301 | 0,14036111 | -3,9032414 | 9,49E-05   | 0,00071632 | JAM2      |
| ENSGALG000000003937 | 13547,5021 | -0,548529686 | 0,13001502 | -4,2189717 | 2,45E-05   | 0,0002241  | GEMIN5    |
| ENSGALG000000005727 | 12274,5514 | -0,548590838 | 0,11540717 | -4,7535249 | 2,00E-06   | 2,41E-05   |           |
| ENSGALG000000017083 | 1252,48764 | -0,54907192  | 0,15967948 | -3,4385878 | 0,00058476 | 0,00341401 |           |
| ENSGALG000000006971 | 10409,6787 | -0,549657911 | 0,11864179 | -4,6329201 | 3,61E-06   | 4,12E-05   |           |
| ENSGALG000000003026 | 1987,5595  | -0,550107166 | 0,16872812 | -3,260317  | 0,00111288 | 0,00583885 | MKL2      |
| ENSGALG000000011400 | 12123,5934 | -0,550294288 | 0,10312199 | -5,3363428 | 9,48E-08   | 1,53E-06   | USP44     |
| ENSGALG000000028501 | 7019,46403 | -0,550742687 | 0,11797631 | -4,6682481 | 3,04E-06   | 3,52E-05   | DCK       |
| ENSGALG000000007097 | 2035,76357 | -0,551520351 | 0,16963125 | -3,2512898 | 0,00114883 | 0,00599972 | RPS6KA6   |
| ENSGALG000000017006 | 4626,73679 | -0,551986159 | 0,11796255 | -4,6793338 | 2,88E-06   | 3,35E-05   | SETDB2    |
| ENSGALG000000004071 | 3249,44294 | -0,552437495 | 0,12317196 | -4,4850915 | 7,29E-06   | 7,73E-05   | NETO2     |
| ENSGALG000000000684 | 3181,04311 | -0,552570682 | 0,14354544 | -3,849448  | 0,00011838 | 0,00086424 | KLHDC8A   |
| ENSGALG000000003835 | 27823,2079 | -0,552761335 | 0,10615776 | -5,20698   | 1,92E-07   | 2,92E-06   |           |
| ENSGALG000000016883 | 3231,09542 | -0,555002491 | 0,12790983 | -4,3390135 | 1,43E-05   | 0,00014131 | DOCK9     |
| ENSGALG000000004813 | 26912,1889 | -0,555221474 | 0,11731903 | -4,732578  | 2,22E-06   | 2,65E-05   | IARS      |
| ENSGALG000000005774 | 2418,90539 | -0,555555373 | 0,13336098 | -4,1658014 | 3,10E-05   | 0,00027359 |           |
| ENSGALG000000013635 | 10619,1615 | -0,555662229 | 0,12215986 | -4,5486483 | 5,40E-06   | 5,91E-05   | SCAF8     |
| ENSGALG000000016468 | 6793,09113 | -0,555855719 | 0,10894695 | -5,1020767 | 3,36E-07   | 4,84E-06   |           |
| ENSGALG000000013430 | 2775,68087 | -0,557212283 | 0,1237629  | -4,5022564 | 6,72E-06   | 7,16E-05   |           |
| ENSGALG000000021487 | 6790,2413  | -0,55890103  | 0,12790718 | -4,3695829 | 1,24E-05   | 0,00012525 |           |
| ENSGALG000000016231 | 123947,503 | -0,55907395  | 0,10983383 | -5,0901798 | 3,58E-07   | 5,11E-06   |           |
| ENSGALG000000019178 | 3990,13341 | -0,559313492 | 0,12498595 | -4,475011  | 7,64E-06   | 8,08E-05   | PRDM15    |
| ENSGALG000000010022 | 5530,32804 | -0,559381952 | 0,11898015 | -4,7014729 | 2,58E-06   | 3,04E-05   | PRMT9     |
| ENSGALG000000011692 | 9047,47741 | -0,559417827 | 0,11608282 | -4,8191269 | 1,44E-06   | 1,81E-05   | CDCA4     |
| ENSGALG000000000447 | 760,920402 | -0,559669779 | 0,17125604 | -3,2680295 | 0,00108299 | 0,00571066 |           |
| ENSGALG000000011541 | 6975,19884 | -0,559795067 | 0,14049051 | -3,9845755 | 6,76E-05   | 0,00053309 | BIN1      |
| ENSGALG000000003510 | 5135,23749 | -0,562160497 | 0,117815   | -4,771553  | 1,83E-06   | 2,23E-05   | UCK2      |
| ENSGALG000000012508 | 4886,27256 | -0,562203872 | 0,11484296 | -4,8954143 | 9,81E-07   | 1,28E-05   |           |
| ENSGALG000000027231 | 9354,14873 | -0,562988244 | 0,15371607 | -3,6625204 | 0,00024975 | 0,00165578 | NRARP     |
| ENSGALG000000016897 | 2920,76606 | -0,563110321 | 0,12347462 | -4,560535  | 5,10E-06   | 5,64E-05   | GPR180    |
| ENSGALG000000010081 | 2535,91839 | -0,563235953 | 0,1656002  | -3,4011791 | 0,00067096 | 0,00383667 | SH3D19    |
| ENSGALG000000003074 | 3831,59863 | -0,563796907 | 0,1286586  | -4,382116  | 1,18E-05   | 0,0001188  | HOMER3    |
| ENSGALG000000012256 | 15406,5047 | -0,563809375 | 0,16328803 | -3,4528519 | 0,00055469 | 0,0032709  | UTRN      |
| ENSGALG000000026438 | 2075,6069  | -0,563826313 | 0,13056342 | -4,3184093 | 1,57E-05   | 0,00015218 |           |
| ENSGALG000000008132 | 7657,49338 | -0,564518166 | 0,11630408 | -4,8538123 | 1,21E-06   | 1,55E-05   |           |
| ENSGALG000000022808 | 24156,7928 | -0,565497585 | 0,10524059 | -5,3733791 | 7,73E-08   | 1,27E-06   |           |
| ENSGALG000000011228 | 7018,88755 | -0,565699287 | 0,12484784 | -4,5311101 | 5,87E-06   | 6,35E-05   | WARS      |
| ENSGALG000000014940 | 2607,30528 | -0,566659105 | 0,15847617 | -3,575674  | 0,00034933 | 0,00221571 | ZUFSP     |
| ENSGALG000000016917 | 1018,50229 | -0,567495374 | 0,16489149 | -3,4416292 | 0,00057822 | 0,00338311 |           |
| ENSGALG000000015431 | 2610,45813 | -0,567537408 | 0,12799629 | -4,4340144 | 9,25E-06   | 9,61E-05   |           |
| ENSGALG000000009855 | 7273,65346 | -0,567662024 | 0,12230573 | -4,6413362 | 3,46E-06   | 3,97E-05   | TBC1D9    |
| ENSGALG000000017079 | 12990,6555 | -0,56791639  | 0,12482195 | -4,5498117 | 5,37E-06   | 5,89E-05   | USPL1     |
| ENSGALG000000000195 | 1824,65996 | -0,568283448 | 0,16007893 | -3,5500202 | 0,0003852  | 0,00240134 | SVCT2     |
| ENSGALG000000003906 | 12475,0381 | -0,568387401 | 0,10947502 | -5,1919368 | 2,08E-07   | 3,14E-06   | MPHOSPH10 |
| ENSGALG000000016281 | 11421,2288 | -0,569360911 | 0,1081146  | -5,2662723 | 1,39E-07   | 2,17E-06   | DMD       |
| ENSGALG000000016391 | 2197,60679 | -0,569812042 | 0,1354173  | -4,2078232 | 2,58E-05   | 0,00023357 | CNKS2     |
| ENSGALG000000015142 | 3202,10584 | -0,570285644 | 0,13342262 | -4,2742801 | 1,92E-05   | 0,00018068 | DSG2      |
| ENSGALG000000009714 | 1150,55938 | -0,570305895 | 0,15558254 | -3,6656163 | 0,00024674 | 0,00164114 | CBR4      |
| ENSGALG000000014783 | 10636,0999 | -0,572122303 | 0,12610507 | -4,5368701 | 5,71E-06   | 6,20E-05   |           |
| ENSGALG000000016910 | 23108,1995 | -0,572230903 | 0,11163907 | -5,1257228 | 2,96E-07   | 4,30E-06   | RBM26     |
| ENSGALG000000012849 | 5113,46952 | -0,57279907  | 0,14885384 | -3,8480636 | 0,00011906 | 0,00086774 | SLC37A3   |
| ENSGALG000000001363 | 21664,3518 | -0,573517858 | 0,10988778 | -5,2191233 | 1,80E-07   | 2,75E-06   | MYBBP1A   |
| ENSGALG000000003180 | 15412,6584 | -0,573999724 | 0,10818558 | -5,3056952 | 1,12E-07   | 1,78E-06   |           |
| ENSGALG000000013031 | 1094,94036 | -0,574014118 | 0,17360499 | -3,306438  | 0,0009449  | 0,0051051  | CECR1     |

|                    |            |              |            |            |            |            |              |
|--------------------|------------|--------------|------------|------------|------------|------------|--------------|
| ENSGALG00000016807 | 10081,6726 | -0,574724846 | 0,11386342 | -5,0474932 | 4,48E-07   | 6,28E-06   |              |
| ENSGALG00000016841 | 10674,7371 | -0,576008454 | 0,1276781  | -4,5114115 | 6,44E-06   | 6,90E-05   |              |
| ENSGALG00000020057 | 1737,42699 | -0,576621955 | 0,13651224 | -4,2239578 | 2,40E-05   | 0,00021964 | PIGF         |
| ENSGALG00000007992 | 6680,6643  | -0,5769061   | 0,10933512 | -5,2764942 | 1,32E-07   | 2,06E-06   | GGA3         |
| ENSGALG00000003591 | 1041,85294 | -0,577610116 | 0,17930224 | -3,2214327 | 0,00127551 | 0,00653599 |              |
| ENSGALG00000014939 | 2493,31868 | -0,579384653 | 0,17435114 | -3,3230906 | 0,00089026 | 0,00486197 | GFM2         |
| ENSGALG00000004612 | 6633,12124 | -0,579433401 | 0,10947713 | -5,2927345 | 1,21E-07   | 1,90E-06   | MTHFR        |
| ENSGALG00000007008 | 8124,26296 | -0,579649516 | 0,11753702 | -4,9316337 | 8,15E-07   | 1,08E-05   | POLR3E       |
| ENSGALG00000004140 | 1503,56079 | -0,579940212 | 0,16796039 | -3,4528392 | 0,00055472 | 0,0032709  | SH3BP4       |
| ENSGALG00000015629 | 16787,8501 | -0,581629702 | 0,10138489 | -5,736848  | 9,65E-09   | 1,91E-07   |              |
| ENSGALG00000010202 | 1508,60268 | -0,581722546 | 0,16884284 | -3,4453492 | 0,00057032 | 0,00334551 | ENTPD5       |
| ENSGALG00000006713 | 2292,89242 | -0,58181715  | 0,14500758 | -4,0123223 | 6,01E-05   | 0,00048209 |              |
| ENSGALG00000011464 | 79055,7934 | -0,582311331 | 0,10582388 | -5,5026456 | 3,74E-08   | 6,56E-07   | EIF5         |
| ENSGALG00000017130 | 3473,80286 | -0,582570563 | 0,12916331 | -4,510341  | 6,47E-06   | 6,91E-05   |              |
| ENSGALG00000015000 | 15510,2528 | -0,584898632 | 0,10441804 | -5,6015092 | 2,12E-08   | 3,93E-07   | LYAR         |
| ENSGALG00000020899 | 644,115695 | -0,585391733 | 0,1791404  | -3,2677818 | 0,00108394 | 0,00571345 |              |
| ENSGALG00000027517 | 979,679294 | -0,585667855 | 0,16395158 | -3,5722001 | 0,00035399 | 0,00224065 | gga-mir-3064 |
| ENSGALG00000007677 | 1856,87137 | -0,585818002 | 0,14520033 | -4,03455   | 5,47E-05   | 0,0004451  | THNSL1       |
| ENSGALG00000003426 | 1636,16491 | -0,587203746 | 0,15658355 | -3,7500986 | 0,00017677 | 0,00123292 | RHBDL3       |
| ENSGALG00000015765 | 12998,2541 | -0,587270267 | 0,1455632  | -4,0344695 | 5,47E-05   | 0,0004451  |              |
| ENSGALG00000015310 | 4463,74355 | -0,587354563 | 0,1636253  | -3,5896318 | 0,00033115 | 0,00211768 |              |
| ENSGALG00000004144 | 27007,8593 | -0,588131949 | 0,10975399 | -5,3586383 | 8,39E-08   | 1,37E-06   |              |
| ENSGALG00000012946 | 11580,0518 | -0,588849778 | 0,11469761 | -5,1339326 | 2,84E-07   | 4,13E-06   | FAM60A       |
| ENSGALG00000016187 | 8513,83254 | -0,588903063 | 0,11295401 | -5,2136534 | 1,85E-07   | 2,82E-06   | WDR4         |
| ENSGALG00000000284 | 7651,65914 | -0,589684267 | 0,12270008 | -4,8058996 | 1,54E-06   | 1,92E-05   | HOXB4        |
| ENSGALG00000015556 | 4802,19905 | -0,591646833 | 0,12793817 | -4,6244747 | 3,76E-06   | 4,27E-05   | AFAP1        |
| ENSGALG00000012147 | 18627,0418 | -0,591734529 | 0,11258805 | -5,255749  | 1,47E-07   | 2,30E-06   | DDX18        |
| ENSGALG00000008376 | 8424,82548 | -0,592197559 | 0,12144073 | -4,8764326 | 1,08E-06   | 1,40E-05   | EIF2B5       |
| ENSGALG00000005803 | 3271,76516 | -0,592808251 | 0,15820978 | -3,746976  | 0,00017898 | 0,0012457  |              |
| ENSGALG00000002326 | 890,069728 | -0,593338649 | 0,18376433 | -3,2288021 | 0,0012431  | 0,00640113 |              |
| ENSGALG00000011449 | 1934,52119 | -0,594721435 | 0,14281353 | -4,1643215 | 3,12E-05   | 0,00027501 |              |
| ENSGALG00000007536 | 1357,15347 | -0,59551277  | 0,15673099 | -3,7995852 | 0,00014494 | 0,0010337  |              |
| ENSGALG00000014213 | 4954,50424 | -0,596053951 | 0,12959904 | -4,5992158 | 4,24E-06   | 4,76E-05   | PRR5         |
| ENSGALG00000009458 | 5058,56826 | -0,596085417 | 0,1247109  | -4,7797377 | 1,76E-06   | 2,15E-05   |              |
| ENSGALG00000005171 | 1357,22705 | -0,597406416 | 0,14458    | -4,1320128 | 3,60E-05   | 0,00031066 | AP1S3        |
| ENSGALG00000005243 | 13547,5044 | -0,597738338 | 0,10284356 | -5,8121126 | 6,17E-09   | 1,27E-07   | PPP3CB       |
| ENSGALG00000020438 | 1854,20177 | -0,597817303 | 0,14024952 | -4,2625265 | 2,02E-05   | 0,00018927 |              |
| ENSGALG00000027159 | 3433,75807 | -0,598718251 | 0,16764923 | -3,5712556 | 0,00035527 | 0,00224353 | CNKSR3       |
| ENSGALG00000014615 | 13865,3358 | -0,598774766 | 0,14500125 | -4,1294456 | 3,64E-05   | 0,00031335 | LAMA1        |
| ENSGALG00000011210 | 4763,25316 | -0,598839459 | 0,11293547 | -5,3024922 | 1,14E-07   | 1,81E-06   | FAM175A      |
| ENSGALG00000020003 | 15165,0611 | -0,59891041  | 0,11112336 | -5,3895993 | 7,06E-08   | 1,17E-06   | MAP3K4       |
| ENSGALG00000015409 | 17031,8673 | -0,599227418 | 0,14738119 | -4,0658336 | 4,79E-05   | 0,00039565 | PROS1        |
| ENSGALG00000011710 | 2961,63072 | -0,599591029 | 0,18819478 | -3,186013  | 0,00144248 | 0,00722302 |              |
| ENSGALG00000001003 | 4385,75735 | -0,600081977 | 0,12148953 | -4,9393718 | 7,84E-07   | 1,04E-05   | SEPN1        |
| ENSGALG00000006256 | 7733,33351 | -0,600800071 | 0,11264625 | -5,3335117 | 9,63E-08   | 1,55E-06   |              |
| ENSGALG00000011280 | 7822,14955 | -0,603497491 | 0,12276846 | -4,9157374 | 8,84E-07   | 1,16E-05   | EEA1         |
| ENSGALG00000010603 | 12309,7524 | -0,604746743 | 0,10826314 | -5,585897  | 2,32E-08   | 4,26E-07   |              |
| ENSGALG00000005807 | 96623,5673 | -0,604834873 | 0,10467707 | -5,7781028 | 7,55E-09   | 1,52E-07   | IPO7         |
| ENSGALG00000007030 | 1042,03468 | -0,605544059 | 0,16028433 | -3,7779368 | 0,00015813 | 0,00111611 |              |
| ENSGALG00000010623 | 6764,86118 | -0,606701235 | 0,11188195 | -5,4226907 | 5,87E-08   | 9,92E-07   | ORC1         |
| ENSGALG00000006147 | 7732,277   | -0,607224855 | 0,1099367  | -5,5234047 | 3,32E-08   | 5,88E-07   | NUCB2        |
| ENSGALG00000009348 | 14314,7884 | -0,607303929 | 0,15062704 | -4,0318387 | 5,53E-05   | 0,00044957 |              |
| ENSGALG00000011522 | 2524,77962 | -0,607850232 | 0,13426355 | -4,5272914 | 5,97E-06   | 6,44E-05   | TRMT61A      |
| ENSGALG00000010538 | 11960,1749 | -0,60879058  | 0,11003246 | -5,5328272 | 3,15E-08   | 5,61E-07   |              |
| ENSGALG00000011618 | 1230,20769 | -0,609057453 | 0,18958218 | -3,2126303 | 0,00131525 | 0,0067043  | ADSSL1       |
| ENSGALG00000015689 | 13523,3466 | -0,609077567 | 0,14382998 | -4,2347051 | 2,29E-05   | 0,00021053 | KIAA0368     |
| ENSGALG00000005492 | 6703,97246 | -0,609713298 | 0,14208413 | -4,2912131 | 1,78E-05   | 0,00016883 |              |
| ENSGALG00000009698 | 6354,41268 | -0,610790424 | 0,15890149 | -3,8438306 | 0,00012113 | 0,00088176 | SLC38A1      |
| ENSGALG00000016302 | 7538,43287 | -0,61104581  | 0,14235289 | -4,2924722 | 1,77E-05   | 0,00016811 |              |
| ENSGALG00000000438 | 3178,97206 | -0,61235395  | 0,14457738 | -4,2354755 | 2,28E-05   | 0,00020995 | ERMP1        |
| ENSGALG00000004169 | 13748,9297 | -0,613558741 | 0,10706722 | -5,7305937 | 1,00E-08   | 1,97E-07   |              |
| ENSGALG00000013760 | 3088,02148 | -0,614432788 | 0,12107074 | -5,0749899 | 3,88E-07   | 5,50E-06   |              |

|                    |            |              |            |            |            |            |          |
|--------------------|------------|--------------|------------|------------|------------|------------|----------|
| ENSGALG00000016574 | 1715,06369 | -0,614768808 | 0,14203902 | -4,3281683 | 1,50E-05   | 0,00014706 | GEMIN8   |
| ENSGALG00000007703 | 1248,99291 | -0,614958252 | 0,15352984 | -4,005464  | 6,19E-05   | 0,00049426 |          |
| ENSGALG00000013480 | 4896,2242  | -0,615680556 | 0,12423491 | -4,9557774 | 7,20E-07   | 9,61E-06   |          |
| ENSGALG00000016808 | 40422,889  | -0,615970468 | 0,12307828 | -5,0047047 | 5,59E-07   | 7,68E-06   | RANBP2   |
| ENSGALG00000006237 | 12767,8147 | -0,616678741 | 0,12728487 | -4,8448706 | 1,27E-06   | 1,61E-05   | PKN2     |
| ENSGALG00000016951 | 1808,55603 | -0,617422601 | 0,13578215 | -4,5471559 | 5,44E-06   | 5,94E-05   | MTRF1    |
| ENSGALG00000008265 | 23793,5701 | -0,619236444 | 0,10979734 | -5,639813  | 1,70E-08   | 3,22E-07   |          |
| ENSGALG00000017388 | 6991,3984  | -0,619582917 | 0,11595165 | -5,3434592 | 9,12E-08   | 1,48E-06   |          |
| ENSGALG00000005815 | 11029,7481 | -0,619938317 | 0,10990838 | -5,6405009 | 1,70E-08   | 3,22E-07   | TMEM41B  |
| ENSGALG00000012533 | 37098,6017 | -0,619977689 | 0,14353496 | -4,3193496 | 1,56E-05   | 0,00015175 |          |
| ENSGALG00000001192 | 22737,8249 | -0,620466491 | 0,15464988 | -4,0120722 | 6,02E-05   | 0,00048223 |          |
| ENSGALG00000016653 | 1523,27891 | -0,621295808 | 0,14742536 | -4,2143076 | 2,51E-05   | 0,00022817 |          |
| ENSGALG00000012447 | 5839,1863  | -0,62156312  | 0,12782967 | -4,8624324 | 1,16E-06   | 1,49E-05   |          |
| ENSGALG00000008539 | 7630,14576 | -0,622137491 | 0,12115192 | -5,1351847 | 2,82E-07   | 4,11E-06   | ALG12    |
| ENSGALG00000023419 | 9218,5287  | -0,622730836 | 0,13105342 | -4,7517328 | 2,02E-06   | 2,42E-05   | HOXD4    |
| ENSGALG00000000234 | 2924,36008 | -0,623968223 | 0,14846856 | -4,2026959 | 2,64E-05   | 0,00023813 | EPB41L4A |
| ENSGALG00000005438 | 938,768709 | -0,624083264 | 0,1616022  | -3,8618489 | 0,00011253 | 0,00082862 | PARVA    |
| ENSGALG00000010975 | 6618,99977 | -0,624280901 | 0,11571015 | -5,3952131 | 6,84E-08   | 1,14E-06   | TMTC2    |
| ENSGALG00000005504 | 1081,65735 | -0,624552568 | 0,17314094 | -3,6071917 | 0,00030953 | 0,00199538 | HNF1B    |
| ENSGALG00000006609 | 9375,25541 | -0,624834648 | 0,13736708 | -4,5486491 | 5,40E-06   | 5,91E-05   | EPHB1    |
| ENSGALG00000014860 | 10686,5811 | -0,625239897 | 0,10707403 | -5,8393235 | 5,24E-09   | 1,09E-07   | YES1     |
| ENSGALG00000017159 | 5806,67135 | -0,626252438 | 0,14290102 | -4,3824212 | 1,17E-05   | 0,00011872 | ATM      |
| ENSGALG00000004046 | 1117,46957 | -0,627070394 | 0,16993702 | -3,6900164 | 0,00022424 | 0,00150916 | LARP6    |
| ENSGALG00000014855 | 4504,15014 | -0,627700184 | 0,1611556  | -3,8949947 | 9,82E-05   | 0,00073827 |          |
| ENSGALG00000010702 | 11951,0445 | -0,628390454 | 0,10835766 | -5,7992249 | 6,66E-09   | 1,36E-07   | ADSS     |
| ENSGALG00000015472 | 37144,6363 | -0,629536006 | 0,14753725 | -4,266963  | 1,98E-05   | 0,00018598 |          |
| ENSGALG00000012966 | 5358,75757 | -0,62976328  | 0,1160975  | -5,4244346 | 5,81E-08   | 9,83E-07   | ZBTB2    |
| ENSGALG00000005450 | 5500,73037 | -0,632586778 | 0,12083814 | -5,2349926 | 1,65E-07   | 2,54E-06   | CCDC66   |
| ENSGALG00000005256 | 11273,3374 | -0,63393871  | 0,16414924 | -3,8619656 | 0,00011248 | 0,00082862 | EPHA4    |
| ENSGALG00000014337 | 1369,70172 | -0,634337238 | 0,14622858 | -4,3379841 | 1,44E-05   | 0,00014177 | NWD2     |
| ENSGALG00000009850 | 11171,8574 | -0,63459607  | 0,10804099 | -5,8736605 | 4,26E-09   | 9,11E-08   | NOVA1    |
| ENSGALG00000004937 | 10776,4972 | -0,634904509 | 0,10951564 | -5,7973865 | 6,74E-09   | 1,37E-07   | VGLL4    |
| ENSGALG00000017368 | 7609,78676 | -0,635358308 | 0,10950994 | -5,8018322 | 6,56E-09   | 1,34E-07   | TRNT1    |
| ENSGALG00000007392 | 3781,92945 | -0,635704603 | 0,14088967 | -4,5120739 | 6,42E-06   | 6,88E-05   |          |
| ENSGALG00000003767 | 4407,98301 | -0,636798593 | 0,11771515 | -5,4096572 | 6,31E-08   | 1,06E-06   | NKD1     |
| ENSGALG00000007710 | 1737,58327 | -0,637223247 | 0,15253964 | -4,1774273 | 2,95E-05   | 0,00026123 |          |
| ENSGALG00000012813 | 15846,5259 | -0,637913408 | 0,12201058 | -5,228345  | 1,71E-07   | 2,63E-06   |          |
| ENSGALG00000005521 | 7067,27493 | -0,637995859 | 0,13170481 | -4,844135  | 1,27E-06   | 1,62E-05   | PER2     |
| ENSGALG00000022490 | 838,24845  | -0,638026939 | 0,20482582 | -3,1149732 | 0,00183962 | 0,00878204 |          |
| ENSGALG00000023451 | 10451,6138 | -0,638494594 | 0,10528216 | -6,0646041 | 1,32E-09   | 3,09E-08   | TRPM7    |
| ENSGALG00000007056 | 3476,50953 | -0,638790551 | 0,18102964 | -3,5286518 | 0,00041768 | 0,00258161 |          |
| ENSGALG00000003891 | 23052,983  | -0,638963678 | 0,10013766 | -6,3808527 | 1,76E-10   | 4,67E-09   | ZNF423   |
| ENSGALG00000012662 | 3593,37854 | -0,639523486 | 0,12409213 | -5,1536182 | 2,56E-07   | 3,78E-06   | NUAK1    |
| ENSGALG00000014138 | 4048,40305 | -0,640267154 | 0,14067976 | -4,5512386 | 5,33E-06   | 5,86E-05   | NFXL1    |
| ENSGALG00000011162 | 1836,73645 | -0,640538648 | 0,15156233 | -4,2262391 | 2,38E-05   | 0,00021772 | CYP46A1  |
| ENSGALG00000009240 | 3768,49084 | -0,641416186 | 0,11670261 | -5,4961599 | 3,88E-08   | 6,79E-07   | NFE2L2   |
| ENSGALG00000007352 | 21915,6386 | -0,641667347 | 0,10923519 | -5,8741815 | 4,25E-09   | 9,10E-08   |          |
| ENSGALG00000009445 | 3221,29491 | -0,642383978 | 0,12265432 | -5,2373531 | 1,63E-07   | 2,51E-06   | INPP5F   |
| ENSGALG00000010642 | 1388,2464  | -0,643267076 | 0,1679801  | -3,8294242 | 0,00012844 | 0,00093118 | IRF2     |
| ENSGALG00000005321 | 14326,6827 | -0,645095033 | 0,14628713 | -4,4097866 | 1,03E-05   | 0,0001064  |          |
| ENSGALG00000005024 | 4274,06304 | -0,645541534 | 0,13739879 | -4,6983057 | 2,62E-06   | 3,09E-05   | EFCC1    |
| ENSGALG00000026181 | 1587,87421 | -0,645581251 | 0,15765694 | -4,0948483 | 4,22E-05   | 0,00035587 |          |
| ENSGALG00000010536 | 11449,0338 | -0,646034394 | 0,1106982  | -5,8359971 | 5,35E-09   | 1,11E-07   | FAF1     |
| ENSGALG00000016480 | 10063,5827 | -0,647091328 | 0,12228762 | -5,2915523 | 1,21E-07   | 1,91E-06   | SDC1     |
| ENSGALG00000000258 | 23273,6972 | -0,649481888 | 0,12291472 | -5,2840043 | 1,26E-07   | 1,98E-06   |          |
| ENSGALG00000000761 | 2678,90106 | -0,649687901 | 0,13200757 | -4,9215959 | 8,58E-07   | 1,13E-05   | TSKU     |
| ENSGALG00000014902 | 5870,32391 | -0,650325285 | 0,12934166 | -5,0279647 | 4,96E-07   | 6,90E-06   |          |
| ENSGALG00000006864 | 655,136383 | -0,651213169 | 0,19973556 | -3,2603768 | 0,00111264 | 0,00583885 |          |
| ENSGALG00000014873 | 10860,5943 | -0,6514166   | 0,10605415 | -6,1423019 | 8,13E-10   | 1,95E-08   | GJA1     |
| ENSGALG00000012232 | 769,021092 | -0,652989979 | 0,19777702 | -3,3016474 | 0,00096119 | 0,00517256 | DNAAF2   |
| ENSGALG00000003154 | 3509,17671 | -0,653496705 | 0,12218795 | -5,3482908 | 8,88E-08   | 1,45E-06   | TXNDC11  |
| ENSGALG00000005845 | 8323,59423 | -0,655210424 | 0,12474397 | -5,2524419 | 1,50E-07   | 2,33E-06   | SLC7A5   |



|                    |            |              |            |            |            |            |          |
|--------------------|------------|--------------|------------|------------|------------|------------|----------|
| ENSGALG00000015241 | 1466,0595  | -0,655397927 | 0,14176198 | -4,6232279 | 3,78E-06   | 4,29E-05   |          |
| ENSGALG00000015653 | 733,019478 | -0,655959247 | 0,20273574 | -3,2355382 | 0,00121414 | 0,00627819 |          |
| ENSGALG00000016681 | 817,923627 | -0,656368052 | 0,1696389  | -3,8692071 | 0,00010919 | 0,00080882 | DHRX     |
| ENSGALG00000000690 | 5466,00123 | -0,657633862 | 0,14151675 | -4,6470389 | 3,37E-06   | 3,87E-05   | GDPD4    |
| ENSGALG00000016817 | 6729,25411 | -0,658902643 | 0,1108429  | -5,944473  | 2,77E-09   | 6,16E-08   | RASA3    |
| ENSGALG00000006975 | 7158,07962 | -0,659116429 | 0,117355   | -5,6164324 | 1,95E-08   | 3,65E-07   |          |
| ENSGALG00000006840 | 2751,68484 | -0,659559733 | 0,17118981 | -3,8527979 | 0,00011678 | 0,00085525 |          |
| ENSGALG00000006681 | 619,278693 | -0,660452265 | 0,21494413 | -3,0726695 | 0,00212153 | 0,009926   | BRK2     |
| ENSGALG00000010204 | 972,360103 | -0,660708753 | 0,16806539 | -3,9312602 | 8,45E-05   | 0,0006489  | KCNC2    |
| ENSGALG00000008551 | 7057,17591 | -0,661341847 | 0,12495655 | -5,2925743 | 1,21E-07   | 1,90E-06   | CRELD2   |
| ENSGALG00000007870 | 12818,5577 | -0,66197661  | 0,11665024 | -5,6748844 | 1,39E-08   | 2,68E-07   |          |
| ENSGALG00000005796 | 13227,6265 | -0,664735985 | 0,10635028 | -6,2504396 | 4,09E-10   | 1,01E-08   | XBP1     |
| ENSGALG00000008293 | 829,335943 | -0,66560113  | 0,20054725 | -3,3189242 | 0,00090365 | 0,00491931 | SH3PXD2A |
| ENSGALG00000009915 | 13723,0991 | -0,66741216  | 0,11515882 | -5,7955799 | 6,81E-09   | 1,39E-07   | EML4     |
| ENSGALG00000005512 | 8645,01109 | -0,667653797 | 0,11848963 | -5,6347026 | 1,75E-08   | 3,31E-07   |          |
| ENSGALG00000008418 | 2809,25172 | -0,668553187 | 0,12270622 | -5,4484051 | 5,08E-08   | 8,65E-07   | LARGE2   |
| ENSGALG00000011139 | 4725,82862 | -0,66929694  | 0,13400223 | -4,9946703 | 5,89E-07   | 8,03E-06   |          |
| ENSGALG00000011686 | 12938,7332 | -0,670528172 | 0,14703222 | -4,5604165 | 5,11E-06   | 5,64E-05   | SEMA5B   |
| ENSGALG00000008240 | 2340,29769 | -0,670953542 | 0,12956854 | -5,1783675 | 2,24E-07   | 3,35E-06   | CFLAR    |
| ENSGALG00000006080 | 30589,3035 | -0,672288685 | 0,10183892 | -6,6014906 | 4,07E-11   | 1,17E-09   | GPC4     |
| ENSGALG00000028291 | 15611,0719 | -0,672824764 | 0,13419575 | -5,0137561 | 5,34E-07   | 7,39E-06   |          |
| ENSGALG00000004715 | 1867,94138 | -0,672888292 | 0,15250355 | -4,4122795 | 1,02E-05   | 0,00010534 |          |
| ENSGALG00000015912 | 3388,05891 | -0,674238434 | 0,14603918 | -4,6168326 | 3,90E-06   | 4,41E-05   |          |
| ENSGALG00000015708 | 22628,5619 | -0,674375402 | 0,17848955 | -3,7782347 | 0,00015794 | 0,00111536 | FGFR3    |
| ENSGALG00000008684 | 70609,009  | -0,674536207 | 0,12880685 | -5,236804  | 1,63E-07   | 2,52E-06   |          |
| ENSGALG00000010049 | 749,198004 | -0,6748978   | 0,20825089 | -3,2407919 | 0,00119198 | 0,00618241 | PTPRB    |
| ENSGALG00000003249 | 7468,82123 | -0,675105103 | 0,11166729 | -6,0456838 | 1,49E-09   | 3,45E-08   | CWF19L1  |
| ENSGALG00000006035 | 6729,77158 | -0,676290578 | 0,10833566 | -6,2425484 | 4,30E-10   | 1,06E-08   | PDE3B    |
| ENSGALG00000004494 | 4756,9197  | -0,676838081 | 0,11957995 | -5,66013   | 1,51E-08   | 2,89E-07   | CCNE1    |
| ENSGALG00000016451 | 7945,90073 | -0,679900325 | 0,13943898 | -4,8759701 | 1,08E-06   | 1,40E-05   | ROCK2    |
| ENSGALG00000006437 | 3771,99053 | -0,682364759 | 0,12175344 | -5,6044805 | 2,09E-08   | 3,87E-07   |          |
| ENSGALG00000009156 | 5048,98485 | -0,682556058 | 0,16761459 | -4,0721757 | 4,66E-05   | 0,0003862  | CDAN1    |
| ENSGALG00000014274 | 3304,6353  | -0,683648491 | 0,13949356 | -4,9009322 | 9,54E-07   | 1,25E-05   |          |
| ENSGALG00000012390 | 2074,46154 | -0,684899295 | 0,14739748 | -4,6466147 | 3,37E-06   | 3,87E-05   |          |
| ENSGALG00000009152 | 8451,92517 | -0,685418448 | 0,13463812 | -5,0908202 | 3,57E-07   | 5,10E-06   | ATRNL1   |
| ENSGALG00000004631 | 4926,28212 | -0,686947368 | 0,19666311 | -3,4930159 | 0,0004776  | 0,00288615 | DRAXIN   |
| ENSGALG00000010836 | 1260,23388 | -0,688393097 | 0,16687599 | -4,1251777 | 3,70E-05   | 0,00031781 |          |
| ENSGALG00000015879 | 11968,4164 | -0,689623134 | 0,14800439 | -4,6594775 | 3,17E-06   | 3,66E-05   | HUNK     |
| ENSGALG00000008234 | 5250,56204 | -0,689849994 | 0,12730961 | -5,4186797 | 6,00E-08   | 1,01E-06   | ORC2     |
| ENSGALG00000016308 | 5133,40137 | -0,690314419 | 0,12814377 | -5,3870307 | 7,16E-08   | 1,18E-06   | MYC      |
| ENSGALG00000014686 | 1912,60456 | -0,691021625 | 0,17304639 | -3,9932738 | 6,52E-05   | 0,00051675 | FBN2     |
| ENSGALG00000025627 | 543,306297 | -0,691903941 | 0,1957541  | -3,5345567 | 0,00040846 | 0,00253126 | SNORD47  |
| ENSGALG00000008292 | 9417,47651 | -0,69263042  | 0,12226746 | -5,6648794 | 1,47E-08   | 2,83E-07   |          |
| ENSGALG00000011679 | 1487,18993 | -0,695574487 | 0,17407076 | -3,9959294 | 6,44E-05   | 0,00051158 |          |
| ENSGALG00000007371 | 25835,4514 | -0,695805113 | 0,11656083 | -5,9694591 | 2,38E-09   | 5,36E-08   | IGDCC3   |
| ENSGALG00000017220 | 8610,42217 | -0,695886193 | 0,12577786 | -5,5326606 | 3,15E-08   | 5,61E-07   |          |
| ENSGALG00000008758 | 3528,49517 | -0,696392948 | 0,11831828 | -5,8857597 | 3,96E-09   | 8,56E-08   |          |
| ENSGALG00000028415 | 2970,11444 | -0,698216592 | 0,20411152 | -3,4207604 | 0,00062446 | 0,00360716 |          |
| ENSGALG00000016834 | 1336,22512 | -0,698351437 | 0,16279355 | -4,2897979 | 1,79E-05   | 0,00016974 | MCF2L    |
| ENSGALG00000002316 | 6016,72913 | -0,700708149 | 0,10987572 | -6,3772792 | 1,80E-10   | 4,77E-09   | NUBP2    |
| ENSGALG00000002689 | 3193,98974 | -0,701352786 | 0,13477202 | -5,2039941 | 1,95E-07   | 2,96E-06   |          |
| ENSGALG00000007501 | 495,825919 | -0,702573548 | 0,22104241 | -3,1784559 | 0,00148062 | 0,00735447 |          |
| ENSGALG00000006592 | 563,467935 | -0,703616422 | 0,19089215 | -3,6859369 | 0,00022786 | 0,00153051 |          |
| ENSGALG00000021316 | 17378,3782 | -0,704586437 | 0,10231836 | -6,8862169 | 5,73E-12   | 1,88E-10   |          |
| ENSGALG00000012153 | 842,909942 | -0,706186244 | 0,17364706 | -4,0667908 | 4,77E-05   | 0,00039426 | METTL15  |
| ENSGALG00000002762 | 6873,84376 | -0,70662137  | 0,1320656  | -5,3505333 | 8,77E-08   | 1,43E-06   | UHRF1BP1 |
| ENSGALG00000002726 | 8639,35675 | -0,708755608 | 0,13953348 | -5,0794664 | 3,78E-07   | 5,38E-06   | KIF1B    |
| ENSGALG00000007141 | 2245,3684  | -0,70907976  | 0,1459375  | -4,8587906 | 1,18E-06   | 1,52E-05   | LRRK1    |
| ENSGALG00000011680 | 3554,59737 | -0,709602993 | 0,18365321 | -3,8638203 | 0,00011163 | 0,00082355 | EPHA5    |
| ENSGALG00000012848 | 3745,19397 | -0,711139877 | 0,17381561 | -4,0913464 | 4,29E-05   | 0,00035977 |          |
| ENSGALG00000022857 | 997,971589 | -0,711204976 | 0,16756929 | -4,2442441 | 2,19E-05   | 0,000203   |          |
| ENSGALG00000015733 | 14565,4266 | -0,711632203 | 0,17400694 | -4,0896772 | 4,32E-05   | 0,00036185 |          |

|                    |            |              |            |            |            |            |          |
|--------------------|------------|--------------|------------|------------|------------|------------|----------|
| ENSGALG00000017365 | 2855,56643 | -0,712049377 | 0,15174035 | -4,6925512 | 2,70E-06   | 3,17E-05   |          |
| ENSGALG00000009562 | 5126,97314 | -0,714412903 | 0,12876119 | -5,548356  | 2,88E-08   | 5,20E-07   |          |
| ENSGALG00000003970 | 25720,8179 | -0,714513793 | 0,12407312 | -5,7588122 | 8,47E-09   | 1,70E-07   |          |
| ENSGALG00000003161 | 1569,92422 | -0,715518291 | 0,16581373 | -4,3151933 | 1,59E-05   | 0,00015387 |          |
| ENSGALG00000016927 | 1190,18904 | -0,715628819 | 0,17643861 | -4,0559649 | 4,99E-05   | 0,00041123 |          |
| ENSGALG00000013615 | 780,849369 | -0,715808204 | 0,18333875 | -3,9042931 | 9,45E-05   | 0,00071361 |          |
| ENSGALG00000010036 | 359,240321 | -0,717787007 | 0,2219662  | -3,2337671 | 0,00122169 | 0,00630861 | FOSL2    |
| ENSGALG00000015122 | 2528,57664 | -0,719672556 | 0,13908654 | -5,174279  | 2,29E-07   | 3,42E-06   | TAF4B    |
| ENSGALG00000020805 | 5789,80169 | -0,719835862 | 0,11391762 | -6,318916  | 2,63E-10   | 6,72E-09   | LRRC8D   |
| ENSGALG00000005430 | 950,090619 | -0,72235333  | 0,20225367 | -3,5715216 | 0,00035491 | 0,00224229 | ALS2CL   |
| ENSGALG00000002553 | 2782,54105 | -0,723490416 | 0,16062171 | -4,5043127 | 6,66E-06   | 7,10E-05   | PCDH1    |
| ENSGALG00000007242 | 1612,83074 | -0,724284111 | 0,14362964 | -5,0427204 | 4,59E-07   | 6,42E-06   | SLITRK4  |
| ENSGALG00000008078 | 7758,49805 | -0,725207523 | 0,12521944 | -5,7914932 | 6,98E-09   | 1,42E-07   |          |
| ENSGALG00000006978 | 1693,58452 | -0,725851222 | 0,16965998 | -4,2782701 | 1,88E-05   | 0,00017784 | APOOL    |
| ENSGALG00000004004 | 8836,32885 | -0,725989536 | 0,12198937 | -5,9512525 | 2,66E-09   | 5,95E-08   | PHKB     |
| ENSGALG00000005246 | 9658,47999 | -0,7272373   | 0,12335529 | -5,8954691 | 3,74E-09   | 8,11E-08   |          |
| ENSGALG00000028294 | 3609,41474 | -0,727698928 | 0,13043446 | -5,5790387 | 2,42E-08   | 4,40E-07   | VWA5B2   |
| ENSGALG00000006939 | 26463,2292 | -0,728311968 | 0,1092521  | -6,6663427 | 2,62E-11   | 7,76E-10   | PFKP     |
| ENSGALG00000006555 | 1381,69164 | -0,729109536 | 0,15543069 | -4,6908983 | 2,72E-06   | 3,19E-05   |          |
| ENSGALG00000025743 | 3141,82765 | -0,729896626 | 0,1215881  | -6,0030268 | 1,94E-09   | 4,42E-08   | CDR2     |
| ENSGALG00000016078 | 860,370977 | -0,73004938  | 0,19386389 | -3,7657832 | 0,00016603 | 0,00116639 |          |
| ENSGALG00000014419 | 9837,23866 | -0,730417334 | 0,1131065  | -6,4577842 | 1,06E-10   | 2,87E-09   |          |
| ENSGALG00000020479 | 3560,77871 | -0,731996794 | 0,12990873 | -5,6347005 | 1,75E-08   | 3,31E-07   |          |
| ENSGALG00000003378 | 7303,91386 | -0,732735156 | 0,12423155 | -5,8981405 | 3,68E-09   | 8,01E-08   | USP42    |
| ENSGALG00000015627 | 1040,22039 | -0,73285779  | 0,21291454 | -3,4420279 | 0,00057737 | 0,00337958 |          |
| ENSGALG00000026349 | 29196,624  | -0,736634172 | 0,09993715 | -7,3709745 | 1,69E-13   | 6,80E-12   |          |
| ENSGALG00000007069 | 592,208375 | -0,738101541 | 0,23259838 | -3,1732876 | 0,00150723 | 0,00745945 |          |
| ENSGALG00000016537 | 11629,8341 | -0,739933749 | 0,1619397  | -4,5691932 | 4,90E-06   | 5,45E-05   | SCML2    |
| ENSGALG00000010448 | 40598,9396 | -0,742255902 | 0,1099244  | -6,7524215 | 1,45E-11   | 4,48E-10   | LTBP1    |
| ENSGALG00000002679 | 1869,60302 | -0,743662338 | 0,15155473 | -4,9068896 | 9,25E-07   | 1,21E-05   | GLT1D1   |
| ENSGALG00000007331 | 18072,4344 | -0,744880346 | 0,10843853 | -6,8691486 | 6,46E-12   | 2,09E-10   | SVIL     |
| ENSGALG00000027639 | 27019,6011 | -0,74689172  | 0,10811506 | -6,9083041 | 4,90E-12   | 1,61E-10   |          |
| ENSGALG00000010522 | 11132,1004 | -0,747786716 | 0,11992122 | -6,2356496 | 4,50E-10   | 1,11E-08   |          |
| ENSGALG00000003975 | 3354,11348 | -0,748226558 | 0,14508752 | -5,1570704 | 2,51E-07   | 3,71E-06   |          |
| ENSGALG00000008910 | 360,623018 | -0,749041615 | 0,22125446 | -3,3854305 | 0,00071067 | 0,00402652 | CERKL    |
| ENSGALG00000003149 | 1878,4222  | -0,749443102 | 0,15295343 | -4,8998124 | 9,59E-07   | 1,25E-05   |          |
| ENSGALG00000007011 | 11491,2627 | -0,750635431 | 0,11252384 | -6,6709014 | 2,54E-11   | 7,56E-10   |          |
| ENSGALG00000023464 | 2176,79492 | -0,751478603 | 0,16284203 | -4,6147706 | 3,94E-06   | 4,45E-05   |          |
| ENSGALG00000019961 | 8882,89233 | -0,7532835   | 0,12923015 | -5,8290072 | 5,58E-09   | 1,16E-07   | SLC18B1  |
| ENSGALG00000003430 | 9094,42264 | -0,754857044 | 0,10828451 | -6,9710529 | 3,15E-12   | 1,08E-10   | PMS2     |
| ENSGALG00000015862 | 12207,7026 | -0,756350316 | 0,14990125 | -5,0456572 | 4,52E-07   | 6,34E-06   |          |
| ENSGALG00000008318 | 18620,5264 | -0,756789619 | 0,11792666 | -6,4174599 | 1,39E-10   | 3,71E-09   | SLK      |
| ENSGALG00000010412 | 643,758245 | -0,756929566 | 0,17972006 | -4,2117143 | 2,53E-05   | 0,00023004 | WWTR1    |
| ENSGALG00000004981 | 3521,90259 | -0,757070103 | 0,13293065 | -5,6952262 | 1,23E-08   | 2,40E-07   | TSEN2    |
| ENSGALG00000006981 | 1290,89613 | -0,757579596 | 0,16920706 | -4,477234  | 7,56E-06   | 8,01E-05   |          |
| ENSGALG00000007667 | 1024,27903 | -0,757882718 | 0,16652285 | -4,5512235 | 5,33E-06   | 5,86E-05   | GPR158   |
| ENSGALG00000000742 | 7852,97756 | -0,757900463 | 0,13118075 | -5,777528  | 7,58E-09   | 1,53E-07   |          |
| ENSGALG00000001419 | 2086,70105 | -0,758492411 | 0,14074025 | -5,389307  | 7,07E-08   | 1,17E-06   | DAB2IP   |
| ENSGALG00000016294 | 651,260147 | -0,761040192 | 0,2034016  | -3,7415644 | 0,00018288 | 0,00126776 | HMGCLL1  |
| ENSGALG00000009748 | 12417,6034 | -0,762363604 | 0,12194724 | -6,2515854 | 4,06E-10   | 1,01E-08   | ASNS     |
| ENSGALG00000006167 | 4665,12691 | -0,763429455 | 0,16136845 | -4,7309711 | 2,23E-06   | 2,66E-05   | LRRC8B   |
| ENSGALG00000017462 | 3834,70932 | -0,763892042 | 0,11771244 | -6,4894761 | 8,61E-11   | 2,38E-09   | FNIP1    |
| ENSGALG00000028254 | 428,450125 | -0,764100303 | 0,21188759 | -3,6061588 | 0,00031076 | 0,00199955 | KIAA1033 |
| ENSGALG00000007300 | 11025,5462 | -0,764508198 | 0,12386685 | -6,1720162 | 6,74E-10   | 1,63E-08   |          |
| ENSGALG00000026862 | 22574,7451 | -0,764882325 | 0,16241479 | -4,7094378 | 2,48E-06   | 2,94E-05   | CLDN1    |
| ENSGALG00000008621 | 9873,26199 | -0,76612038  | 0,13164901 | -5,8194163 | 5,91E-09   | 1,22E-07   | NRP2     |
| ENSGALG00000027389 | 3852,81541 | -0,766788012 | 0,13085522 | -5,8598199 | 4,63E-09   | 9,83E-08   | RGS7BP   |
| ENSGALG00000013782 | 3281,28093 | -0,769533335 | 0,1760353  | -4,3714718 | 1,23E-05   | 0,00012439 | CDH7     |
| ENSGALG00000026897 | 591,300069 | -0,770711311 | 0,20311525 | -3,7944532 | 0,00014797 | 0,00105311 |          |
| ENSGALG00000028737 | 5045,35121 | -0,771568179 | 0,14540814 | -5,3062243 | 1,12E-07   | 1,78E-06   |          |
| ENSGALG00000026518 | 766,815675 | -0,773283921 | 0,17841103 | -4,3342831 | 1,46E-05   | 0,00014396 | RUNDC3A  |
| ENSGALG00000005610 | 640,252491 | -0,773621314 | 0,24264802 | -3,1882449 | 0,00143139 | 0,00718021 | SLC44A3  |

|                    |            |              |            |            |            |            |            |
|--------------------|------------|--------------|------------|------------|------------|------------|------------|
| ENSGALG00000004594 | 1038,5627  | -0,774792529 | 0,20891066 | -3,7087267 | 0,0002083  | 0,00141449 | CD74       |
| ENSGALG00000013627 | 453,51839  | -0,775913381 | 0,21080288 | -3,6807532 | 0,00023255 | 0,00155583 | SLC7A2     |
| ENSGALG00000015887 | 12708,1034 | -0,776552733 | 0,12924098 | -6,0085643 | 1,87E-09   | 4,28E-08   | URB1       |
| ENSGALG00000015208 | 6752,93068 | -0,778489641 | 0,1611505  | -4,8308236 | 1,36E-06   | 1,72E-05   | ROR2       |
| ENSGALG00000006258 | 9759,66383 | -0,778635815 | 0,12249805 | -6,3563117 | 2,07E-10   | 5,40E-09   | SPOCK1     |
| ENSGALG00000009514 | 5928,6059  | -0,779501664 | 0,11478642 | -6,7908877 | 1,11E-11   | 3,50E-10   | NRCAM      |
| ENSGALG00000001020 | 7177,33389 | -0,780112538 | 0,1084839  | -7,1910444 | 6,43E-13   | 2,41E-11   |            |
| ENSGALG00000013683 | 18236,9052 | -0,780228434 | 0,15315117 | -5,0944986 | 3,50E-07   | 5,02E-06   | ARID1B     |
| ENSGALG00000008961 | 32098,1427 | -0,780468343 | 0,16688611 | -4,6766524 | 2,92E-06   | 3,39E-05   |            |
| ENSGALG00000012834 | 693,301303 | -0,78090617  | 0,24310402 | -3,2122306 | 0,00131709 | 0,00671113 | AKR1D1     |
| ENSGALG00000009393 | 806,584777 | -0,782303357 | 0,19134913 | -4,088356  | 4,34E-05   | 0,00036327 |            |
| ENSGALG00000012329 | 10571,2971 | -0,782765701 | 0,1633862  | -4,7908925 | 1,66E-06   | 2,05E-05   |            |
| ENSGALG00000026970 | 1108,65361 | -0,785311616 | 0,15637208 | -5,0220706 | 5,11E-07   | 7,09E-06   |            |
| ENSGALG00000009252 | 7419,33117 | -0,788959505 | 0,12427971 | -6,3482569 | 2,18E-10   | 5,65E-09   |            |
| ENSGALG00000012808 | 5957,05996 | -0,789210521 | 0,13604537 | -5,8010834 | 6,59E-09   | 1,35E-07   | CDYL       |
| ENSGALG00000006908 | 14243,3267 | -0,789724754 | 0,14863119 | -5,3133179 | 1,08E-07   | 1,72E-06   | DLG1       |
| ENSGALG00000000639 | 611,516533 | -0,79001541  | 0,22610591 | -3,4940061 | 0,00047583 | 0,00287674 | LRRN2      |
| ENSGALG00000016412 | 2161,43136 | -0,791360693 | 0,13463882 | -5,8776562 | 4,16E-09   | 8,94E-08   | MBOAT2     |
| ENSGALG00000005785 | 2650,42523 | -0,791416097 | 0,18516638 | -4,274081  | 1,92E-05   | 0,00018071 |            |
| ENSGALG00000009428 | 6528,61969 | -0,792261942 | 0,14165832 | -5,5927667 | 2,23E-08   | 4,11E-07   | SUSD6      |
| ENSGALG00000004662 | 3631,94871 | -0,792400882 | 0,16649406 | -4,7593343 | 1,94E-06   | 2,35E-05   | DISP3      |
| ENSGALG00000001995 | 9089,14914 | -0,794307619 | 0,11001846 | -7,2197668 | 5,21E-13   | 1,99E-11   | LIMS2      |
| ENSGALG00000012317 | 261,455312 | -0,794799886 | 0,25524866 | -3,1138259 | 0,00184678 | 0,008807   |            |
| ENSGALG00000025464 | 234,066267 | -0,795229903 | 0,25312021 | -3,1417085 | 0,00167965 | 0,00816148 | SNORA68    |
| ENSGALG00000004132 | 38489,9584 | -0,797075856 | 0,11456459 | -6,9574364 | 3,47E-12   | 1,17E-10   |            |
| ENSGALG00000026486 | 578,46167  | -0,797913674 | 0,2123431  | -3,7576624 | 0,00017151 | 0,00120056 |            |
| ENSGALG00000008378 | 25019,9708 | -0,798096236 | 0,12248113 | -6,5160751 | 7,22E-11   | 2,01E-09   | SRGAP3     |
| ENSGALG00000009932 | 6037,71039 | -0,798314026 | 0,13917513 | -5,7360394 | 9,69E-09   | 1,92E-07   | THADA      |
| ENSGALG00000011045 | 4900,98782 | -0,799075807 | 0,1382254  | -5,7809621 | 7,43E-09   | 1,50E-07   |            |
| ENSGALG00000014907 | 2917,0076  | -0,80019622  | 0,15045066 | -5,3186621 | 1,05E-07   | 1,68E-06   | DCBLD1     |
| ENSGALG00000010910 | 3629,98348 | -0,801671392 | 0,12110467 | -6,619657  | 3,60E-11   | 1,04E-09   |            |
| ENSGALG00000012576 | 1359,57449 | -0,801916632 | 0,1553997  | -5,1603485 | 2,46E-07   | 3,65E-06   | RASEF      |
| ENSGALG00000000583 | 9340,93564 | -0,802342978 | 0,11958733 | -6,7092639 | 1,96E-11   | 5,94E-10   | SOX13      |
| ENSGALG00000002900 | 2509,77542 | -0,803716995 | 0,14588715 | -5,5091691 | 3,61E-08   | 6,34E-07   | NOTUM      |
| ENSGALG00000027521 | 307,657411 | -0,803725098 | 0,23936001 | -3,3578085 | 0,00078563 | 0,00439095 |            |
| ENSGALG00000013212 | 21085,1244 | -0,805085082 | 0,11564313 | -6,9618063 | 3,36E-12   | 1,14E-10   |            |
| ENSGALG00000001883 | 2479,1556  | -0,805297687 | 0,12694065 | -6,3438913 | 2,24E-10   | 5,80E-09   | ST6GALNAC2 |
| ENSGALG00000003105 | 820,425544 | -0,805784417 | 0,19045019 | -4,2309456 | 2,33E-05   | 0,00021336 | ANKFN1     |
| ENSGALG00000002461 | 9290,02388 | -0,808165073 | 0,1405519  | -5,7499407 | 8,93E-09   | 1,77E-07   |            |
| ENSGALG00000002242 | 344,643988 | -0,808545932 | 0,22942797 | -3,5241821 | 0,00042479 | 0,00262173 |            |
| ENSGALG00000017103 | 2337,4348  | -0,811501513 | 0,12799906 | -6,3399023 | 2,30E-10   | 5,93E-09   | WASF3      |
| ENSGALG00000014957 | 24709,1325 | -0,81285735  | 0,11248513 | -7,226354  | 4,96E-13   | 1,90E-11   | WDR1       |
| ENSGALG00000003427 | 8550,66088 | -0,813323099 | 0,12341029 | -6,5903992 | 4,39E-11   | 1,25E-09   | USP3       |
| ENSGALG00000011089 | 415,157392 | -0,814043658 | 0,22510112 | -3,6163466 | 0,00029879 | 0,00193531 |            |
| ENSGALG00000011643 | 20679,5817 | -0,816325927 | 0,14686948 | -5,5581725 | 2,73E-08   | 4,94E-07   | UTP20      |
| ENSGALG00000010785 | 498,938482 | -0,818155142 | 0,1993699  | -4,1037045 | 4,07E-05   | 0,00034533 | ACOT11     |
| ENSGALG00000001220 | 3875,78907 | -0,818155857 | 0,12990789 | -6,2979691 | 3,02E-10   | 7,62E-09   | HERPUD1    |
| ENSGALG00000002598 | 7963,93283 | -0,82047281  | 0,10859443 | -7,5553857 | 4,18E-14   | 1,82E-12   | TPST1      |
| ENSGALG00000011511 | 101055,806 | -0,820640197 | 0,12654102 | -6,4851715 | 8,86E-11   | 2,44E-09   | CKB        |
| ENSGALG00000003160 | 1417,99184 | -0,823423786 | 0,17588287 | -4,68166   | 2,85E-06   | 3,32E-05   |            |
| ENSGALG00000006872 | 8998,32455 | -0,823650254 | 0,11488863 | -7,1691189 | 7,55E-13   | 2,79E-11   | PISD       |
| ENSGALG00000007039 | 11318,9545 | -0,823801989 | 0,1338606  | -6,1541783 | 7,55E-10   | 1,82E-08   |            |
| ENSGALG00000004569 | 2222,44652 | -0,82424563  | 0,16546211 | -4,9814767 | 6,31E-07   | 8,53E-06   | UNC5B      |
| ENSGALG00000010507 | 1443,23999 | -0,824303692 | 0,1501991  | -5,4880735 | 4,06E-08   | 7,08E-07   |            |
| ENSGALG00000003391 | 10590,4517 | -0,827807721 | 0,10949157 | -7,5604701 | 4,02E-14   | 1,76E-12   | EIF2AK1    |
| ENSGALG00000009546 | 1643,01363 | -0,832251183 | 0,15248225 | -5,4580202 | 4,81E-08   | 8,27E-07   |            |
| ENSGALG00000007717 | 242,860186 | -0,834765713 | 0,25520347 | -3,270981  | 0,00107175 | 0,00566236 | GCNT7      |
| ENSGALG00000014954 | 7661,41015 | -0,835213371 | 0,11582931 | -7,2107259 | 5,57E-13   | 2,10E-11   | ZNF518B    |
| ENSGALG00000008469 | 4008,42168 | -0,83875822  | 0,14975785 | -5,6007628 | 2,13E-08   | 3,94E-07   | SPINT1     |
| ENSGALG00000002543 | 5887,09033 | -0,840502021 | 0,12400471 | -6,7779847 | 1,22E-11   | 3,81E-10   | CSGALNACT2 |
| ENSGALG00000015980 | 410,785738 | -0,841274637 | 0,25003277 | -3,3646576 | 0,00076639 | 0,00429398 |            |
| ENSGALG00000011388 | 12926,4854 | -0,842306194 | 0,12106876 | -6,9572544 | 3,47E-12   | 1,17E-10   | RABGGTB    |

|                    |            |              |            |            |            |            |         |
|--------------------|------------|--------------|------------|------------|------------|------------|---------|
| ENSGALG00000015519 | 4471,93343 | -0,844394446 | 0,12450731 | -6,7818863 | 1,19E-11   | 3,71E-10   | ROBO2   |
| ENSGALG00000015656 | 12813,5339 | -0,849003497 | 0,12458324 | -6,814749  | 9,44E-12   | 3,00E-10   |         |
| ENSGALG00000012998 | 2617,34593 | -0,849149352 | 0,17683084 | -4,8020434 | 1,57E-06   | 1,96E-05   | WNT5B   |
| ENSGALG00000024984 | 247,007719 | -0,849437052 | 0,24634113 | -3,4482145 | 0,00056431 | 0,00332167 | SNORD74 |
| ENSGALG00000023609 | 5841,30372 | -0,855145185 | 0,13510752 | -6,3293679 | 2,46E-10   | 6,31E-09   |         |
| ENSGALG00000014178 | 3963,51548 | -0,855544377 | 0,15025645 | -5,6938946 | 1,24E-08   | 2,41E-07   | SCUBE1  |
| ENSGALG00000012394 | 13948,8666 | -0,855781498 | 0,10361657 | -8,259118  | 1,47E-16   | 8,54E-15   | NID2    |
| ENSGALG00000003668 | 1594,44053 | -0,85921128  | 0,14225789 | -6,0398144 | 1,54E-09   | 3,57E-08   |         |
| ENSGALG00000007846 | 1019,28883 | -0,863598394 | 0,23089134 | -3,7402805 | 0,00018381 | 0,00127223 |         |
| ENSGALG00000010311 | 430,972494 | -0,865329105 | 0,20595707 | -4,2015023 | 2,65E-05   | 0,00023907 | NAV3    |
| ENSGALG00000015681 | 7286,43618 | -0,869123123 | 0,13859875 | -6,270786  | 3,59E-10   | 9,02E-09   | NRIP1   |
| ENSGALG00000010010 | 1250,74925 | -0,869227214 | 0,15347637 | -5,6635898 | 1,48E-08   | 2,84E-07   | RHOQ    |
| ENSGALG00000008815 | 1450,48158 | -0,86979829  | 0,16636094 | -5,2283804 | 1,71E-07   | 2,63E-06   | LRRN4   |
| ENSGALG00000011376 | 402,726863 | -0,870171475 | 0,21157345 | -4,1128575 | 3,91E-05   | 0,00033421 | ANKRD9  |
| ENSGALG00000016896 | 2175,65472 | -0,874558686 | 0,16022347 | -5,4583681 | 4,81E-08   | 8,26E-07   | ABCC4   |
| ENSGALG00000023581 | 218,882989 | -0,876769713 | 0,27869933 | -3,145934  | 0,00165557 | 0,00806463 |         |
| ENSGALG00000009129 | 1209,82081 | -0,878296092 | 0,17155705 | -5,1195568 | 3,06E-07   | 4,43E-06   | DLX5    |
| ENSGALG00000004542 | 7447,83595 | -0,879244031 | 0,1445917  | -6,0808747 | 1,20E-09   | 2,81E-08   | ZMYND8  |
| ENSGALG00000016462 | 9552,69875 | -0,880157248 | 0,13995983 | -6,2886421 | 3,20E-10   | 8,07E-09   | MYCN    |
| ENSGALG00000028602 | 5443,19542 | -0,881510014 | 0,15763284 | -5,5921725 | 2,24E-08   | 4,12E-07   |         |
| ENSGALG00000011120 | 494,969816 | -0,88227849  | 0,23574872 | -3,7424529 | 0,00018223 | 0,00126458 |         |
| ENSGALG00000003657 | 764,546995 | -0,88270712  | 0,19877995 | -4,4406246 | 8,97E-06   | 9,38E-05   |         |
| ENSGALG00000028320 | 417,903769 | -0,88451445  | 0,27202551 | -3,2515863 | 0,00114763 | 0,00599848 |         |
| ENSGALG00000001749 | 4549,2907  | -0,88875485  | 0,12757912 | -6,9663033 | 3,25E-12   | 1,11E-10   | ACSBG2  |
| ENSGALG00000005723 | 2016,64963 | -0,890647194 | 0,1398661  | -6,3678562 | 1,92E-10   | 5,03E-09   |         |
| ENSGALG00000009360 | 602,385427 | -0,890830846 | 0,19246128 | -4,6286237 | 3,68E-06   | 4,19E-05   | CAPN2   |
| ENSGALG00000002555 | 1358,14983 | -0,892902927 | 0,21167678 | -4,2182374 | 2,46E-05   | 0,00022468 | RET     |
| ENSGALG00000000307 | 8913,08352 | -0,894951246 | 0,11346269 | -7,8876258 | 3,08E-15   | 1,50E-13   |         |
| ENSGALG00000012012 | 5383,1455  | -0,895703636 | 0,17255692 | -5,1907721 | 2,09E-07   | 3,15E-06   |         |
| ENSGALG00000017870 | 493,118342 | -0,896459218 | 0,20520273 | -4,3686516 | 1,25E-05   | 0,00012543 | SNORD24 |
| ENSGALG00000008547 | 11178,1998 | -0,896850751 | 0,12624913 | -7,1038172 | 1,21E-12   | 4,41E-11   |         |
| ENSGALG00000008509 | 336,231933 | -0,897122538 | 0,26693729 | -3,3607988 | 0,00077717 | 0,00434905 |         |
| ENSGALG00000012814 | 2520,13193 | -0,898069575 | 0,12792713 | -7,0201654 | 2,22E-12   | 7,76E-11   | PXDC1   |
| ENSGALG00000017838 | 224,751439 | -0,898451215 | 0,26076736 | -3,4454129 | 0,00057019 | 0,00334551 | SNORA62 |
| ENSGALG00000009687 | 2155,9656  | -0,89897016  | 0,15726738 | -5,7161896 | 1,09E-08   | 2,13E-07   | KCNK2   |
| ENSGALG00000014645 | 469,375441 | -0,89901657  | 0,21753348 | -4,1327733 | 3,58E-05   | 0,00030983 | MEF2C   |
| ENSGALG00000006498 | 20254,306  | -0,899416586 | 0,16914983 | -5,3172776 | 1,05E-07   | 1,69E-06   |         |
| ENSGALG00000026790 | 419,691292 | -0,903869706 | 0,25606475 | -3,5298482 | 0,0004158  | 0,0025729  | DMRT2   |
| ENSGALG00000002704 | 377,643334 | -0,906514113 | 0,2414033  | -3,7551852 | 0,00017321 | 0,00121125 |         |
| ENSGALG00000026258 | 289,161398 | -0,909500707 | 0,24047052 | -3,7821713 | 0,00015547 | 0,00110014 | MAF     |
| ENSGALG00000004231 | 640,948749 | -0,911405982 | 0,18347202 | -4,9675475 | 6,78E-07   | 9,10E-06   | IFNLR1  |
| ENSGALG00000013861 | 1063,53974 | -0,913164571 | 0,17955855 | -5,0856088 | 3,66E-07   | 5,22E-06   | TNFAIP3 |
| ENSGALG00000020723 | 828,748724 | -0,913543779 | 0,17554467 | -5,204053  | 1,95E-07   | 2,96E-06   |         |
| ENSGALG00000005994 | 969,598357 | -0,91862167  | 0,17763077 | -5,1715232 | 2,32E-07   | 3,46E-06   | DERL3   |
| ENSGALG00000010683 | 599,988497 | -0,919156764 | 0,20193219 | -4,551809  | 5,32E-06   | 5,85E-05   |         |
| ENSGALG00000001656 | 26148,0576 | -0,922800056 | 0,11046642 | -8,3536705 | 6,62E-17   | 4,00E-15   |         |
| ENSGALG00000009540 | 5865,4242  | -0,9229711   | 0,11652612 | -7,9207228 | 2,36E-15   | 1,17E-13   | YAF2    |
| ENSGALG00000025166 | 165,346098 | -0,924288426 | 0,28745972 | -3,2153668 | 0,00130278 | 0,00665566 | SNORD75 |
| ENSGALG00000001000 | 110996,795 | -0,924720639 | 0,13746595 | -6,726907  | 1,73E-11   | 5,28E-10   |         |
| ENSGALG00000008305 | 1229,58651 | -0,925580955 | 0,18545643 | -4,9908269 | 6,01E-07   | 8,18E-06   |         |
| ENSGALG00000016843 | 7409,4478  | -0,926939677 | 0,12855412 | -7,2105013 | 5,57E-13   | 2,10E-11   | COL4A2  |
| ENSGALG00000012911 | 418,92558  | -0,929872331 | 0,26011606 | -3,5748363 | 0,00035045 | 0,00222129 | SYT10   |
| ENSGALG00000008811 | 6177,80088 | -0,931412058 | 0,14890526 | -6,255065  | 3,97E-10   | 9,87E-09   | SLC1A4  |
| ENSGALG00000007952 | 17655,501  | -0,932963194 | 0,1344416  | -6,9395427 | 3,93E-12   | 1,32E-10   | AMOT    |
| ENSGALG00000023241 | 1184,67586 | -0,938819916 | 0,18825868 | -4,9868614 | 6,14E-07   | 8,32E-06   |         |
| ENSGALG00000028708 | 6182,01115 | -0,938854547 | 0,12586313 | -7,4593292 | 8,70E-14   | 3,59E-12   |         |
| ENSGALG00000009415 | 20765,0987 | -0,939656238 | 0,14021273 | -6,7016471 | 2,06E-11   | 6,21E-10   | SMOC1   |
| ENSGALG00000012726 | 95084,9683 | -0,941672551 | 0,12611408 | -7,4668311 | 8,21E-14   | 3,42E-12   |         |
| ENSGALG00000015622 | 657,059398 | -0,944352456 | 0,21737746 | -4,344298  | 1,40E-05   | 0,00013845 |         |
| ENSGALG00000015028 | 404,3337   | -0,946739996 | 0,25007245 | -3,7858628 | 0,00015318 | 0,00108585 |         |
| ENSGALG00000011258 | 44996,7983 | -0,946927699 | 0,14493435 | -6,5334939 | 6,43E-11   | 1,81E-09   |         |
| ENSGALG00000011068 | 1649,85658 | -0,947751489 | 0,14451976 | -6,5579373 | 5,46E-11   | 1,54E-09   | COBLL1  |

|                     |            |              |            |            |            |            |         |
|---------------------|------------|--------------|------------|------------|------------|------------|---------|
| ENSGALG00000005601  | 522,730238 | -0,948098308 | 0,22540074 | -4,2062786 | 2,60E-05   | 0,00023462 |         |
| ENSGALG00000006808  | 9236,5969  | -0,948868926 | 0,10714219 | -8,8561653 | 8,28E-19   | 6,00E-17   | TSPAN6  |
| ENSGALG000000013193 | 667,613336 | -0,948945842 | 0,21648961 | -4,3833321 | 1,17E-05   | 0,00011831 | IRX2    |
| ENSGALG000000023608 | 3676,98571 | -0,950348621 | 0,13455102 | -7,0631096 | 1,63E-12   | 5,82E-11   |         |
| ENSGALG000000005805 | 4566,75731 | -0,954718819 | 0,14551669 | -6,5608886 | 5,35E-11   | 1,52E-09   | PLCD1   |
| ENSGALG000000023463 | 1598,1146  | -0,956997326 | 0,17129068 | -5,5869784 | 2,31E-08   | 4,24E-07   |         |
| ENSGALG000000004393 | 1366,86861 | -0,962441655 | 0,2126961  | -4,5249615 | 6,04E-06   | 6,51E-05   |         |
| ENSGALG000000004284 | 19106,5125 | -0,967926178 | 0,15442375 | -6,2679877 | 3,66E-10   | 9,15E-09   |         |
| ENSGALG000000027342 | 11330,7864 | -0,968330352 | 0,11546028 | -8,3866967 | 5,00E-17   | 3,08E-15   |         |
| ENSGALG000000015908 | 1062,96226 | -0,970529728 | 0,20345544 | -4,7702325 | 1,84E-06   | 2,24E-05   | COL12A1 |
| ENSGALG000000011833 | 13327,6665 | -0,971207285 | 0,11374653 | -8,5383464 | 1,36E-17   | 8,83E-16   |         |
| ENSGALG000000009381 | 15338,368  | -0,972226453 | 0,1330298  | -7,3083359 | 2,70E-13   | 1,06E-11   |         |
| ENSGALG000000015940 | 2397,4582  | -0,972506334 | 0,14243979 | -6,8274905 | 8,64E-12   | 2,76E-10   |         |
| ENSGALG000000007367 | 230,098228 | -0,973082329 | 0,26469761 | -3,6762037 | 0,00023673 | 0,00157994 | WFIKN2  |
| ENSGALG000000010597 | 2446,53537 | -0,973101915 | 0,12722398 | -7,6487303 | 2,03E-14   | 9,27E-13   |         |
| ENSGALG000000027497 | 292,355516 | -0,973179721 | 0,23408863 | -4,157313  | 3,22E-05   | 0,00028231 |         |
| ENSGALG000000019397 | 12676,4129 | -0,975439675 | 0,11488543 | -8,4905432 | 2,06E-17   | 1,31E-15   | CERK    |
| ENSGALG000000002103 | 289,282544 | -0,979001464 | 0,28612607 | -3,4215737 | 0,0006226  | 0,00359944 | TPPP3   |
| ENSGALG000000015624 | 34457,4291 | -0,97910183  | 0,17589785 | -5,5663091 | 2,60E-08   | 4,72E-07   | VCAN    |
| ENSGALG000000015164 | 3228,28619 | -0,982829392 | 0,14802221 | -6,6397428 | 3,14E-11   | 9,24E-10   |         |
| ENSGALG000000020788 | 1411,73564 | -0,986044977 | 0,14888196 | -6,6229983 | 3,52E-11   | 1,02E-09   |         |
| ENSGALG000000001371 | 2323,32831 | -0,990350626 | 0,1647412  | -6,0115541 | 1,84E-09   | 4,21E-08   |         |
| ENSGALG000000009758 | 793,28474  | -0,991410492 | 0,19270405 | -5,1447309 | 2,68E-07   | 3,94E-06   | SLC7A11 |
| ENSGALG000000015440 | 170,656307 | -0,996123586 | 0,28603433 | -3,4825316 | 0,0004967  | 0,00298434 |         |
| ENSGALG000000010692 | 6955,66893 | -0,996294098 | 0,13891979 | -7,1717217 | 7,41E-13   | 2,76E-11   | LRP8    |
| ENSGALG000000026582 | 1194,48697 | -0,997100015 | 0,19077348 | -5,2266176 | 1,73E-07   | 2,64E-06   |         |
| ENSGALG000000002532 | 116,305922 | -0,997428466 | 0,31689231 | -3,1475313 | 0,00164655 | 0,00803219 | GJA4    |
| ENSGALG000000010163 | 10928,5236 | -0,998496131 | 0,12690773 | -7,8678908 | 3,61E-15   | 1,74E-13   | LGR5    |
| ENSGALG000000007483 | 18280,1601 | -0,999963194 | 0,14992811 | -6,669618  | 2,56E-11   | 7,61E-10   | LRIG1   |
| ENSGALG000000005483 | 1190,77186 | -1,005472997 | 0,15529553 | -6,4745779 | 9,51E-11   | 2,59E-09   | CDH13   |
| ENSGALG000000011295 | 1389,14492 | -1,007421144 | 0,15807983 | -6,3728633 | 1,86E-10   | 4,90E-09   | SOCS2   |
| ENSGALG000000016627 | 15863,8272 | -1,008110823 | 0,10822868 | -9,3146368 | 1,22E-20   | 1,03E-18   |         |
| ENSGALG000000008281 | 355,49596  | -1,009962725 | 0,2355243  | -4,2881467 | 1,80E-05   | 0,00017082 | NEURL1  |
| ENSGALG000000015078 | 5440,75757 | -1,010765666 | 0,18233191 | -5,5435478 | 2,96E-08   | 5,32E-07   | MLLT3   |
| ENSGALG000000015112 | 8576,86268 | -1,013051509 | 0,1332664  | -7,6017026 | 2,92E-14   | 1,31E-12   |         |
| ENSGALG000000000949 | 297,083499 | -1,013784064 | 0,23293191 | -4,3522764 | 1,35E-05   | 0,0001336  | HBEGF   |
| ENSGALG000000016616 | 1435,92487 | -1,01551489  | 0,1675974  | -6,0592521 | 1,37E-09   | 3,18E-08   |         |
| ENSGALG000000009450 | 2394,04421 | -1,016064164 | 0,12964787 | -7,8371065 | 4,61E-15   | 2,19E-13   | DUSP10  |
| ENSGALG000000001009 | 527,817322 | -1,018620159 | 0,24676578 | -4,1278826 | 3,66E-05   | 0,00031509 |         |
| ENSGALG000000015896 | 2100,38648 | -1,023057651 | 0,16795043 | -6,0914263 | 1,12E-09   | 2,64E-08   |         |
| ENSGALG000000010156 | 274,639072 | -1,025083823 | 0,24796248 | -4,134028  | 3,56E-05   | 0,00030892 |         |
| ENSGALG000000013124 | 3974,90345 | -1,026819624 | 0,16230106 | -6,3266353 | 2,51E-10   | 6,40E-09   | FHOD3   |
| ENSGALG000000006138 | 2396,05253 | -1,026936244 | 0,15045199 | -6,825674  | 8,75E-12   | 2,79E-10   |         |
| ENSGALG000000010579 | 4573,02342 | -1,028169899 | 0,12570944 | -8,1789393 | 2,86E-16   | 1,62E-14   | STON2   |
| ENSGALG000000012439 | 1314,57587 | -1,028638845 | 0,22792485 | -4,5130614 | 6,39E-06   | 6,86E-05   |         |
| ENSGALG000000019077 | 11786,6675 | -1,030078317 | 0,1385218  | -7,436218  | 1,04E-13   | 4,25E-12   |         |
| ENSGALG000000000977 | 7324,72056 | -1,032464943 | 0,10973117 | -9,4090394 | 5,01E-21   | 4,29E-19   | MAPKAP1 |
| ENSGALG000000016754 | 1717,85966 | -1,034769759 | 0,17703324 | -5,8450593 | 5,06E-09   | 1,06E-07   |         |
| ENSGALG000000012412 | 7272,99248 | -1,036824012 | 0,14525293 | -7,1380593 | 9,47E-13   | 3,47E-11   | MTHFD1L |
| ENSGALG000000027213 | 84,2176986 | -1,037130822 | 0,33646244 | -3,0824565 | 0,002053   | 0,00965178 | ALX1    |
| ENSGALG000000007555 | 13407,2897 | -1,038877738 | 0,11478529 | -9,050617  | 1,42E-19   | 1,11E-17   | CCND1   |
| ENSGALG000000008465 | 8001,13375 | -1,045042375 | 0,12988092 | -8,0461579 | 8,54E-16   | 4,60E-14   | SORCS1  |
| ENSGALG000000022800 | 1489,66503 | -1,045072381 | 0,14566903 | -7,1742935 | 7,27E-13   | 2,72E-11   |         |
| ENSGALG000000017714 | 665,00414  | -1,052113718 | 0,20833312 | -5,050151  | 4,41E-07   | 6,20E-06   |         |
| ENSGALG000000015975 | 5069,41908 | -1,056406602 | 0,12845648 | -8,2238485 | 1,97E-16   | 1,13E-14   |         |
| ENSGALG000000011581 | 10286,8368 | -1,059360643 | 0,33858403 | -3,1287969 | 0,00175524 | 0,00846159 | KIF26A  |
| ENSGALG000000015736 | 279,628079 | -1,060236168 | 0,31923414 | -3,3211867 | 0,00089636 | 0,00488488 |         |
| ENSGALG000000003295 | 2261,70268 | -1,063705711 | 0,15858273 | -6,7075762 | 1,98E-11   | 6,00E-10   |         |
| ENSGALG000000009740 | 783,871387 | -1,063900656 | 0,18158266 | -5,8590432 | 4,66E-09   | 9,86E-08   | RASGRP1 |
| ENSGALG000000013604 | 164,158201 | -1,065244459 | 0,28526693 | -3,7342024 | 0,00018831 | 0,0012975  | VIP     |
| ENSGALG000000011236 | 190,29168  | -1,070413941 | 0,31505499 | -3,3975464 | 0,00067993 | 0,00388308 | BEGAIN  |
| ENSGALG000000017135 | 1406,42375 | -1,071209509 | 0,16120082 | -6,6451865 | 3,03E-11   | 8,92E-10   | CRYL1   |

|                     |            |              |            |            |            |            |           |
|---------------------|------------|--------------|------------|------------|------------|------------|-----------|
| ENSGALG00000002988  | 7561,04394 | -1,072357906 | 0,15209899 | -7,0503948 | 1,78E-12   | 6,33E-11   | PHGDH     |
| ENSGALG00000001370  | 1171,23107 | -1,073396904 | 0,19159469 | -5,6024356 | 2,11E-08   | 3,91E-07   | ADAMTS8   |
| ENSGALG000000027757 | 10827,9262 | -1,076478944 | 0,10801659 | -9,9658664 | 2,15E-23   | 2,27E-21   | ARL4A     |
| ENSGALG000000010891 | 1573,41259 | -1,079203445 | 0,18453813 | -5,8481327 | 4,97E-09   | 1,04E-07   | ABCB11    |
| ENSGALG000000027707 | 112,772942 | -1,082314729 | 0,31181061 | -3,4710644 | 0,0005184  | 0,0030902  | ESM1      |
| ENSGALG000000016899 | 32,6413126 | -1,08275528  | 0,35267355 | -3,0701346 | 0,00213962 | 0,00998662 | DCT       |
| ENSGALG00000000177  | 4145,02133 | -1,083701806 | 0,12196683 | -8,8852173 | 6,38E-19   | 4,70E-17   |           |
| ENSGALG000000025770 | 345,961225 | -1,089960517 | 0,25250889 | -4,3165234 | 1,59E-05   | 0,00015316 |           |
| ENSGALG000000028046 | 6843,87336 | -1,098357134 | 0,11398468 | -9,6360065 | 5,63E-22   | 5,11E-20   | INSIG2    |
| ENSGALG000000012917 | 4548,57829 | -1,102419391 | 0,19071062 | -5,7805874 | 7,44E-09   | 1,50E-07   | CDH6      |
| ENSGALG000000005842 | 443,936227 | -1,104947048 | 0,2118757  | -5,215072  | 1,84E-07   | 2,80E-06   | GDPD2     |
| ENSGALG000000012095 | 202,109683 | -1,108243378 | 0,27163773 | -4,079858  | 4,51E-05   | 0,00037525 | C14orf105 |
| ENSGALG000000002518 | 128,674403 | -1,109129449 | 0,33692493 | -3,2919186 | 0,00099506 | 0,00531078 |           |
| ENSGALG000000009567 | 5248,50516 | -1,113206952 | 0,1654659  | -6,7277124 | 1,72E-11   | 5,27E-10   | TLL1      |
| ENSGALG000000011439 | 1241,39048 | -1,116853678 | 0,16224057 | -6,8839359 | 5,82E-12   | 1,90E-10   |           |
| ENSGALG000000013548 | 35,2312467 | -1,118469658 | 0,33863762 | -3,3028512 | 0,00095707 | 0,00515652 | GZMA      |
| ENSGALG000000014852 | 15743,6418 | -1,119019515 | 0,11136376 | -10,048327 | 9,34E-24   | 1,05E-21   |           |
| ENSGALG000000009179 | 4347,97295 | -1,119360692 | 0,13379231 | -8,3664053 | 5,94E-17   | 3,63E-15   | TNFSF10   |
| ENSGALG000000011172 | 2541,5225  | -1,121518184 | 0,12741815 | -8,8018714 | 1,35E-18   | 9,35E-17   |           |
| ENSGALG000000013892 | 1340,40625 | -1,122648268 | 0,1612643  | -6,9615422 | 3,37E-12   | 1,14E-10   | MAP3K5    |
| ENSGALG000000001079 | 117,890946 | -1,122757301 | 0,33560094 | -3,345513  | 0,00082131 | 0,0045345  | WNT3      |
| ENSGALG000000016680 | 793,768127 | -1,12428894  | 0,23420199 | -4,8005098 | 1,58E-06   | 1,97E-05   | TFAP2B    |
| ENSGALG000000008014 | 284,580595 | -1,126068911 | 0,26416635 | -4,2627266 | 2,02E-05   | 0,00018923 | CEBPB     |
| ENSGALG000000006337 | 35,9815104 | -1,128489411 | 0,34919354 | -3,2317018 | 0,00123055 | 0,00634861 |           |
| ENSGALG000000020151 | 65,1037326 | -1,129234483 | 0,35223689 | -3,205895  | 0,00134643 | 0,0068343  | NMU       |
| ENSGALG000000006376 | 107,4182   | -1,138122247 | 0,32739087 | -3,4763409 | 0,00050831 | 0,00303934 | TMC3      |
| ENSGALG000000027210 | 288,324353 | -1,142415301 | 0,23806373 | -4,7987792 | 1,60E-06   | 1,98E-05   |           |
| ENSGALG000000001085 | 2988,78652 | -1,143093103 | 0,13119308 | -8,7130596 | 2,96E-18   | 1,98E-16   |           |
| ENSGALG000000001276 | 18773,5176 | -1,144775826 | 0,13161296 | -8,6980477 | 3,38E-18   | 2,24E-16   | HOXB9     |
| ENSGALG000000004155 | 218,309793 | -1,147734088 | 0,27623338 | -4,1549435 | 3,25E-05   | 0,00028451 | MYOM3     |
| ENSGALG000000027107 | 1206,95445 | -1,149521147 | 0,15677875 | -7,3321234 | 2,27E-13   | 9,02E-12   |           |
| ENSGALG000000014864 | 769,880572 | -1,150010609 | 0,17012701 | -6,7597182 | 1,38E-11   | 4,28E-10   |           |
| ENSGALG000000027885 | 31,9835607 | -1,151437329 | 0,34943778 | -3,295114  | 0,00098382 | 0,00526107 | C4orf19   |
| ENSGALG000000010926 | 145,649999 | -1,152009571 | 0,31597679 | -3,6458677 | 0,00026649 | 0,00175025 |           |
| ENSGALG000000008875 | 1752,66896 | -1,156831558 | 0,15899216 | -7,2760291 | 3,44E-13   | 1,34E-11   | PLCB1     |
| ENSGALG000000007268 | 3702,32926 | -1,168892699 | 0,14170635 | -8,2486969 | 1,60E-16   | 9,28E-15   |           |
| ENSGALG000000006584 | 535,759637 | -1,169466644 | 0,23137239 | -5,054478  | 4,32E-07   | 6,07E-06   |           |
| ENSGALG000000016114 | 1343,20194 | -1,174926553 | 0,19801604 | -5,9334919 | 2,97E-09   | 6,53E-08   |           |
| ENSGALG000000022871 | 818,020575 | -1,176605905 | 0,18677065 | -6,2997367 | 2,98E-10   | 7,55E-09   |           |
| ENSGALG000000026763 | 724,902739 | -1,177313255 | 0,20694833 | -5,6889236 | 1,28E-08   | 2,48E-07   |           |
| ENSGALG000000017411 | 73,3262064 | -1,17758282  | 0,34864579 | -3,3775909 | 0,00073124 | 0,00412419 | RXFP3     |
| ENSGALG000000016998 | 449,62073  | -1,177970615 | 0,21440175 | -5,494221  | 3,92E-08   | 6,86E-07   | LPAR6     |
| ENSGALG000000008941 | 29,8088387 | -1,184874519 | 0,3508426  | -3,3772253 | 0,00073221 | 0,00412626 | FEZF1     |
| ENSGALG000000002509 | 14719,4349 | -1,185807324 | 0,13269584 | -8,9362812 | 4,02E-19   | 2,98E-17   |           |
| ENSGALG000000012357 | 5240,54414 | -1,187472008 | 0,12252712 | -9,6915034 | 3,28E-22   | 3,16E-20   | CXCR4     |
| ENSGALG000000015665 | 1052,14248 | -1,188036426 | 0,17158557 | -6,9238716 | 4,39E-12   | 1,45E-10   | SH3BP2    |
| ENSGALG000000005619 | 863,255886 | -1,189698364 | 0,2239703  | -5,3118577 | 1,09E-07   | 1,73E-06   |           |
| ENSGALG000000005685 | 3302,12612 | -1,189953127 | 0,15706062 | -7,576394  | 3,55E-14   | 1,57E-12   | KSR1      |
| ENSGALG000000016083 | 216,722511 | -1,190269979 | 0,27117041 | -4,38938   | 1,14E-05   | 0,0001155  |           |
| ENSGALG000000000936 | 1054,13064 | -1,193444435 | 0,15734156 | -7,5850553 | 3,32E-14   | 1,47E-12   |           |
| ENSGALG000000006170 | 3710,82448 | -1,194070483 | 0,14887865 | -8,0204281 | 1,05E-15   | 5,52E-14   | LRRC8C    |
| ENSGALG000000015433 | 4115,11204 | -1,199115509 | 0,12542332 | -9,560547  | 1,17E-21   | 1,05E-19   | ABCA1     |
| ENSGALG000000002923 | 1146,0005  | -1,199213505 | 0,15769125 | -7,6048196 | 2,85E-14   | 1,29E-12   |           |
| ENSGALG000000011104 | 29,5888843 | -1,203717219 | 0,35160223 | -3,4235198 | 0,00061816 | 0,00358289 | GCG       |
| ENSGALG000000012224 | 1928,96823 | -1,20528636  | 0,15139325 | -7,961295  | 1,70E-15   | 8,65E-14   |           |
| ENSGALG000000003582 | 6407,42119 | -1,218636528 | 0,17846722 | -6,8283493 | 8,59E-12   | 2,75E-10   | SLC1A3    |
| ENSGALG000000009667 | 660,393085 | -1,219318734 | 0,24952478 | -4,8865638 | 1,03E-06   | 1,33E-05   | MFAP3L    |
| ENSGALG000000002632 | 1307,71653 | -1,220611399 | 0,17395739 | -7,0167265 | 2,27E-12   | 7,93E-11   | CALCRL    |
| ENSGALG000000009215 | 122,787447 | -1,220936874 | 0,30573548 | -3,9934419 | 6,51E-05   | 0,00051668 |           |
| ENSGALG000000000141 | 479,975266 | -1,223136562 | 0,25876918 | -4,7267474 | 2,28E-06   | 2,72E-05   | BLB1      |
| ENSGALG000000006473 | 340,04191  | -1,223226887 | 0,26548467 | -4,6075237 | 4,07E-06   | 4,58E-05   | PLXNA4    |
| ENSGALG000000007660 | 3604,79456 | -1,228207524 | 0,16378808 | -7,4987599 | 6,44E-14   | 2,69E-12   |           |



|                    |            |              |            |            |            |            |          |
|--------------------|------------|--------------|------------|------------|------------|------------|----------|
| ENSGALG00000013239 | 67578,5287 | -1,231185989 | 0,13442151 | -9,1591442 | 5,23E-20   | 4,24E-18   |          |
| ENSGALG00000008615 | 1056,6531  | -1,233824562 | 0,18606143 | -6,6312754 | 3,33E-11   | 9,74E-10   |          |
| ENSGALG00000003739 | 39854,6748 | -1,237172502 | 0,12123912 | -10,2044   | 1,89E-24   | 2,28E-22   |          |
| ENSGALG00000029023 | 187,057616 | -1,242039059 | 0,26924919 | -4,6129723 | 3,97E-06   | 4,48E-05   | DMRTB1   |
| ENSGALG00000009532 | 9821,7952  | -1,242374232 | 0,11357599 | -10,938705 | 7,53E-28   | 1,13E-25   | GXYLT1   |
| ENSGALG00000011867 | 2059,31955 | -1,242989678 | 0,14218556 | -8,7420246 | 2,29E-18   | 1,56E-16   | SERHL2   |
| ENSGALG00000005427 | 736,096188 | -1,25622691  | 0,18500374 | -6,7902783 | 1,12E-11   | 3,51E-10   |          |
| ENSGALG00000013237 | 693,51796  | -1,260226776 | 0,21528589 | -5,8537361 | 4,81E-09   | 1,01E-07   |          |
| ENSGALG00000010858 | 12929,1308 | -1,268608971 | 0,32118282 | -3,9498033 | 7,82E-05   | 0,00060506 | LRP2     |
| ENSGALG00000003353 | 12512,0835 | -1,269046359 | 0,17509801 | -7,2476344 | 4,24E-13   | 1,63E-11   | RAI14    |
| ENSGALG00000019552 | 24,9825451 | -1,269295425 | 0,34407756 | -3,6889806 | 0,00022515 | 0,00151456 | SERPINB2 |
| ENSGALG00000004361 | 87800,4537 | -1,276561341 | 0,12683773 | -10,064524 | 7,93E-24   | 8,99E-22   |          |
| ENSGALG00000008352 | 151,362805 | -1,283975751 | 0,29199529 | -4,3972481 | 1,10E-05   | 0,00011206 |          |
| ENSGALG00000002397 | 837,302305 | -1,291814757 | 0,2176946  | -5,9340689 | 2,96E-09   | 6,52E-08   | PSPH     |
| ENSGALG00000006401 | 4187,88984 | -1,299022844 | 0,12943055 | -10,036447 | 1,05E-23   | 1,16E-21   | OSBPL5   |
| ENSGALG00000014866 | 52452,7894 | -1,312013425 | 0,13134051 | -9,9894042 | 1,70E-23   | 1,83E-21   |          |
| ENSGALG00000005442 | 270,987771 | -1,327990169 | 0,28317276 | -4,6896819 | 2,74E-06   | 3,20E-05   | PALMD    |
| ENSGALG00000016602 | 1659,68203 | -1,339565689 | 0,16372183 | -8,1819615 | 2,79E-16   | 1,58E-14   |          |
| ENSGALG00000021879 | 40,0432745 | -1,34129965  | 0,34849488 | -3,8488361 | 0,00011868 | 0,00086593 |          |
| ENSGALG00000002443 | 492,983426 | -1,353430658 | 0,22722109 | -5,9564481 | 2,58E-09   | 5,77E-08   | FBXL16   |
| ENSGALG00000007771 | 2716,44612 | -1,353742442 | 0,15148338 | -8,9365738 | 4,01E-19   | 2,98E-17   | FAM210B  |
| ENSGALG00000008491 | 3635,92779 | -1,354708919 | 0,1393335  | -9,7227798 | 2,41E-22   | 2,38E-20   |          |
| ENSGALG00000009947 | 4729,08145 | -1,358616298 | 0,11919082 | -11,398666 | 4,25E-30   | 7,32E-28   | PLEKHH2  |
| ENSGALG00000001346 | 421,970817 | -1,362109597 | 0,2357782  | -5,7770803 | 7,60E-09   | 1,53E-07   |          |
| ENSGALG00000028048 | 17805,9742 | -1,362450241 | 0,10389675 | -13,113502 | 2,76E-39   | 8,73E-37   |          |
| ENSGALG00000028047 | 613,76602  | -1,369008166 | 0,2271663  | -6,026458  | 1,68E-09   | 3,86E-08   | RHOV     |
| ENSGALG00000010148 | 96,0680074 | -1,379685752 | 0,32859473 | -4,1987459 | 2,68E-05   | 0,00024168 |          |
| ENSGALG00000003706 | 2880,21855 | -1,390323026 | 0,15220073 | -9,1347989 | 6,55E-20   | 5,25E-18   |          |
| ENSGALG00000009405 | 351,467766 | -1,391691484 | 0,2252283  | -6,1790258 | 6,45E-10   | 1,57E-08   | GRIA2    |
| ENSGALG00000014983 | 1427,7077  | -1,39278689  | 0,17525642 | -7,9471375 | 1,91E-15   | 9,66E-14   | F2R      |
| ENSGALG00000002993 | 1938,95885 | -1,397301236 | 0,15816908 | -8,834225  | 1,01E-18   | 7,22E-17   | CA10     |
| ENSGALG00000015256 | 9909,97899 | -1,397562325 | 0,12338907 | -11,326468 | 9,70E-30   | 1,61E-27   | PAM      |
| ENSGALG00000003114 | 426,741711 | -1,398035927 | 0,21620264 | -6,4663221 | 1,00E-10   | 2,72E-09   | NOG      |
| ENSGALG00000011306 | 2909,70938 | -1,403496478 | 0,13240055 | -10,600382 | 2,97E-26   | 4,17E-24   | DES      |
| ENSGALG00000027133 | 162,089324 | -1,405319409 | 0,31973    | -4,3953317 | 1,11E-05   | 0,00011297 |          |
| ENSGALG00000001768 | 6648,81239 | -1,406520646 | 0,15682598 | -8,9686713 | 3,00E-19   | 2,27E-17   | TENM2    |
| ENSGALG00000005123 | 593,996105 | -1,408198856 | 0,22248629 | -6,3293737 | 2,46E-10   | 6,31E-09   | WNT7A    |
| ENSGALG00000000680 | 6447,75978 | -1,411570576 | 0,1125835  | -12,537988 | 4,63E-36   | 1,19E-33   |          |
| ENSGALG00000009530 | 697,310671 | -1,411853584 | 0,1982451  | -7,1217577 | 1,07E-12   | 3,88E-11   | PDZRN4   |
| ENSGALG00000014343 | 783,229712 | -1,412639292 | 0,1787261  | -7,9039341 | 2,70E-15   | 1,32E-13   |          |
| ENSGALG00000026557 | 168,826381 | -1,412974627 | 0,2911389  | -4,8532664 | 1,21E-06   | 1,55E-05   | PGF      |
| ENSGALG00000011319 | 10478,7818 | -1,42017882  | 0,12658897 | -11,218819 | 3,30E-29   | 5,34E-27   | ADGRL3   |
| ENSGALG00000014823 | 40,5162501 | -1,422401118 | 0,34565713 | -4,1150637 | 3,87E-05   | 0,00033124 |          |
| ENSGALG00000011468 | 1760,29824 | -1,424650779 | 0,18752858 | -7,5969793 | 3,03E-14   | 1,36E-12   | IGFBP5   |
| ENSGALG00000016297 | 52,4647782 | -1,427639697 | 0,35390644 | -4,0339466 | 5,48E-05   | 0,00044582 | HCRTR2   |
| ENSGALG00000019054 | 529,716619 | -1,427749976 | 0,24150691 | -5,911839  | 3,38E-09   | 7,38E-08   |          |
| ENSGALG00000011110 | 296,257233 | -1,431359085 | 0,24880708 | -5,7528873 | 8,77E-09   | 1,75E-07   |          |
| ENSGALG00000011207 | 13680,733  | -1,434035643 | 0,1207094  | -11,880066 | 1,50E-32   | 3,30E-30   | DUSP6    |
| ENSGALG00000012018 | 2349,85185 | -1,435600968 | 0,18691445 | -7,6805242 | 1,58E-14   | 7,29E-13   | UGT8     |
| ENSGALG00000013402 | 51,692715  | -1,446510354 | 0,35385338 | -4,0878805 | 4,35E-05   | 0,00036362 | AHRR     |
| ENSGALG00000011164 | 2326,41675 | -1,446841804 | 0,20831238 | -6,9455393 | 3,77E-12   | 1,26E-10   | CHN2     |
| ENSGALG00000028821 | 11178,852  | -1,46102831  | 0,14885453 | -9,8151415 | 9,69E-23   | 9,70E-21   | GLIPR2   |
| ENSGALG00000001169 | 20569,632  | -1,469628578 | 0,14537593 | -10,10916  | 5,03E-24   | 5,85E-22   | CRB2     |
| ENSGALG00000006072 | 43,451296  | -1,471939488 | 0,35393821 | -4,1587471 | 3,20E-05   | 0,0002809  | SCN10A   |
| ENSGALG00000005855 | 6149,83129 | -1,488520056 | 0,16245344 | -9,1627487 | 5,06E-20   | 4,12E-18   |          |
| ENSGALG00000026262 | 5433,56566 | -1,4922838   | 0,15452733 | -9,6570863 | 4,59E-22   | 4,25E-20   |          |
| ENSGALG00000001621 | 458,454887 | -1,495017381 | 0,22098058 | -6,7653791 | 1,33E-11   | 4,12E-10   | CLDN5    |
| ENSGALG00000011940 | 614,502923 | -1,496267605 | 0,21912179 | -6,8284747 | 8,58E-12   | 2,75E-10   |          |
| ENSGALG00000008978 | 15989,3853 | -1,505709648 | 0,13184171 | -11,420587 | 3,30E-30   | 5,76E-28   |          |
| ENSGALG00000025773 | 391,159032 | -1,506718569 | 0,21938214 | -6,8680093 | 6,51E-12   | 2,11E-10   |          |
| ENSGALG00000015388 | 3557,58163 | -1,507384513 | 0,13257512 | -11,370041 | 5,90E-30   | 1,00E-27   |          |
| ENSGALG00000007171 | 156,082312 | -1,518198388 | 0,29373826 | -5,1685414 | 2,36E-07   | 3,50E-06   | CIITA    |

|                    |            |              |            |            |          |          |          |
|--------------------|------------|--------------|------------|------------|----------|----------|----------|
| ENSGALG00000010258 | 1087,70771 | -1,528410178 | 0,23204878 | -6,5865901 | 4,50E-11 | 1,28E-09 | LTBP2    |
| ENSGALG00000006084 | 149,653293 | -1,531133293 | 0,30821845 | -4,9676886 | 6,78E-07 | 9,10E-06 |          |
| ENSGALG00000005499 | 52125,7921 | -1,531899327 | 0,15487524 | -9,8911829 | 4,55E-23 | 4,65E-21 | IL17RD   |
| ENSGALG00000001383 | 88,9612133 | -1,543511015 | 0,34200221 | -4,5131609 | 6,39E-06 | 6,86E-05 | HTR4     |
| ENSGALG00000017179 | 397,23584  | -1,548130217 | 0,2756174  | -5,6169539 | 1,94E-08 | 3,65E-07 | PDGFD    |
| ENSGALG00000000388 | 10384,9656 | -1,555950834 | 0,15057476 | -10,333411 | 4,98E-25 | 6,33E-23 | LIN28A   |
| ENSGALG00000016293 | 1486,8847  | -1,561397543 | 0,15239221 | -10,245914 | 1,23E-24 | 1,51E-22 | BMP5     |
| ENSGALG00000014657 | 1240,68069 | -1,561923173 | 0,21313827 | -7,3282155 | 2,33E-13 | 9,26E-12 |          |
| ENSGALG00000003957 | 1745,61798 | -1,565814231 | 0,14958689 | -10,46759  | 1,22E-25 | 1,66E-23 |          |
| ENSGALG00000017242 | 1988,33091 | -1,579394776 | 0,13593267 | -11,618949 | 3,30E-31 | 6,42E-29 | FZD4     |
| ENSGALG00000009170 | 1955,30232 | -1,581054934 | 0,13559524 | -11,660106 | 2,04E-31 | 4,02E-29 | NCEH1    |
| ENSGALG00000003323 | 100,589751 | -1,591926379 | 0,32090266 | -4,9607765 | 7,02E-07 | 9,41E-06 | OSGIN1   |
| ENSGALG00000001645 | 733,714958 | -1,608468631 | 0,20509442 | -7,8425762 | 4,41E-15 | 2,10E-13 | KCNT1    |
| ENSGALG00000011609 | 3466,23734 | -1,61436812  | 0,3265448  | -4,9437876 | 7,66E-07 | 1,02E-05 |          |
| ENSGALG00000003126 | 1209,63641 | -1,615974863 | 0,16174479 | -9,990893  | 1,67E-23 | 1,82E-21 | ERBB4    |
| ENSGALG00000019716 | 86,528621  | -1,618712644 | 0,32858792 | -4,9262694 | 8,38E-07 | 1,10E-05 | KRT20    |
| ENSGALG00000016102 | 256,085293 | -1,630912312 | 0,24814594 | -6,5723916 | 4,95E-11 | 1,41E-09 |          |
| ENSGALG00000010468 | 1107,42968 | -1,6309453   | 0,15736024 | -10,364405 | 3,60E-25 | 4,67E-23 | ISM2     |
| ENSGALG00000023521 | 1102,90608 | -1,651708778 | 0,19829188 | -8,3296843 | 8,11E-17 | 4,84E-15 | ADRA2A   |
| ENSGALG00000019261 | 1018,73464 | -1,655584971 | 0,22406874 | -7,3887368 | 1,48E-13 | 6,04E-12 |          |
| ENSGALG00000026892 | 80,0076125 | -1,6734567   | 0,34940022 | -4,7895124 | 1,67E-06 | 2,06E-05 |          |
| ENSGALG00000008353 | 2780,09542 | -1,679225856 | 0,19226914 | -8,7337255 | 2,46E-18 | 1,67E-16 |          |
| ENSGALG00000006997 | 745,789097 | -1,684979264 | 0,17360387 | -9,7058852 | 2,85E-22 | 2,77E-20 | BRINP1   |
| ENSGALG00000029175 | 12384,2511 | -1,685259625 | 0,16604046 | -10,149693 | 3,32E-24 | 3,90E-22 | EFNB2    |
| ENSGALG00000008918 | 724,315184 | -1,685987772 | 0,1865069  | -9,0398142 | 1,57E-19 | 1,22E-17 | LAMP5    |
| ENSGALG00000014930 | 4308,58674 | -1,696897635 | 0,15640418 | -10,849439 | 2,01E-27 | 2,94E-25 | ENC1     |
| ENSGALG00000005498 | 1151,84629 | -1,707286081 | 0,21532932 | -7,928721  | 2,21E-15 | 1,11E-13 |          |
| ENSGALG00000014235 | 549,444331 | -1,721709963 | 0,26416786 | -6,5174846 | 7,15E-11 | 1,99E-09 |          |
| ENSGALG00000013102 | 1811,9189  | -1,724325032 | 0,13966812 | -12,345874 | 5,13E-35 | 1,25E-32 | COBL     |
| ENSGALG00000007218 | 6209,27212 | -1,732428983 | 0,17353793 | -9,9829988 | 1,81E-23 | 1,94E-21 | MB21D2   |
| ENSGALG00000014908 | 2604,03468 | -1,732825245 | 0,16330677 | -10,61086  | 2,65E-26 | 3,76E-24 | FST      |
| ENSGALG00000005476 | 213,71162  | -1,752170936 | 0,31806755 | -5,5088013 | 3,61E-08 | 6,35E-07 | PTH1R    |
| ENSGALG00000011148 | 2471,49648 | -1,754606037 | 0,1499315  | -11,702718 | 1,23E-31 | 2,51E-29 |          |
| ENSGALG00000027874 | 793,364535 | -1,754956403 | 0,23265502 | -7,54317   | 4,59E-14 | 1,97E-12 | CHAC1    |
| ENSGALG00000012635 | 1110,85351 | -1,755097361 | 0,16645491 | -10,543981 | 5,42E-26 | 7,45E-24 |          |
| ENSGALG00000006995 | 175,827248 | -1,759714805 | 0,30239363 | -5,8192853 | 5,91E-09 | 1,22E-07 | APOD     |
| ENSGALG00000027316 | 126,113792 | -1,764476803 | 0,31211141 | -5,6533557 | 1,57E-08 | 3,00E-07 |          |
| ENSGALG00000005519 | 2075,75095 | -1,767947956 | 0,33351026 | -5,3010302 | 1,15E-07 | 1,82E-06 | TLL2     |
| ENSGALG00000009282 | 5108,51903 | -1,769054515 | 0,16415004 | -10,777058 | 4,42E-27 | 6,40E-25 | ELMSAN1  |
| ENSGALG00000007113 | 2619,56625 | -1,77145981  | 0,19094943 | -9,277115  | 1,74E-20 | 1,45E-18 |          |
| ENSGALG00000015148 | 101,324198 | -1,772924708 | 0,34687715 | -5,1111027 | 3,20E-07 | 4,62E-06 | ANXA1    |
| ENSGALG00000023406 | 3748,56647 | -1,774894708 | 0,1767754  | -10,040394 | 1,01E-23 | 1,12E-21 |          |
| ENSGALG00000004930 | 259,836288 | -1,782009807 | 0,32603449 | -5,4657095 | 4,61E-08 | 7,94E-07 | HRH1     |
| ENSGALG00000009920 | 1810,73161 | -1,80046145  | 0,20594812 | -8,742306  | 2,28E-18 | 1,56E-16 | COCH     |
| ENSGALG00000014159 | 18203,792  | -1,81424576  | 0,10616787 | -17,088464 | 1,81E-65 | 1,30E-62 | PACSIN2  |
| ENSGALG00000016875 | 1624,38522 | -1,825016077 | 0,18553233 | -9,836647  | 7,83E-23 | 7,89E-21 |          |
| ENSGALG00000004306 | 1596,76443 | -1,830041848 | 0,15669253 | -11,67919  | 1,63E-31 | 3,26E-29 | SYT12    |
| ENSGALG00000011708 | 13494,0054 | -1,833902608 | 0,12124784 | -15,12524  | 1,10E-51 | 6,01E-49 | MYLK     |
| ENSGALG00000002714 | 18305,7311 | -1,839377527 | 0,12313583 | -14,937793 | 1,87E-50 | 9,10E-48 | TMEM132C |
| ENSGALG00000007963 | 269,370346 | -1,84239576  | 0,2523089  | -7,3021434 | 2,83E-13 | 1,11E-11 | NFATC2   |
| ENSGALG00000014935 | 24043,958  | -1,864724119 | 0,16406086 | -11,366051 | 6,17E-30 | 1,04E-27 | GREB1L   |
| ENSGALG00000015089 | 1244,38805 | -1,867848339 | 0,21666451 | -8,6209242 | 6,64E-18 | 4,39E-16 | GAP43    |
| ENSGALG00000016906 | 16521,3421 | -1,870006943 | 0,10236052 | -18,268829 | 1,47E-74 | 2,00E-71 | SPRY2    |
| ENSGALG00000012392 | 124,624801 | -1,879813042 | 0,30530777 | -6,1571084 | 7,41E-10 | 1,79E-08 | IYD      |
| ENSGALG00000007786 | 809,873559 | -1,895122662 | 0,25833391 | -7,3359423 | 2,20E-13 | 8,79E-12 | DOK5     |
| ENSGALG00000003437 | 453,52356  | -1,896224168 | 0,2236049  | -8,4802444 | 2,25E-17 | 1,43E-15 |          |
| ENSGALG00000009693 | 162,98636  | -1,908196694 | 0,28491477 | -6,69743   | 2,12E-11 | 6,38E-10 | CPXM2    |
| ENSGALG00000026366 | 659,496965 | -1,956428809 | 0,25593066 | -7,6443705 | 2,10E-14 | 9,56E-13 |          |
| ENSGALG00000016377 | 39318,7205 | -1,984049771 | 0,15160151 | -13,087269 | 3,89E-39 | 1,20E-36 | PXDN     |
| ENSGALG00000007646 | 1162,43082 | -1,999886692 | 0,2341543  | -8,5408926 | 1,33E-17 | 8,72E-16 |          |
| ENSGALG00000014727 | 707,495402 | -2,02826974  | 0,22579434 | -8,982819  | 2,64E-19 | 2,02E-17 | PDE4D    |
| ENSGALG00000025941 | 508,274649 | -2,032822244 | 0,21082252 | -9,6423394 | 5,30E-22 | 4,84E-20 | RGS20    |

|                    |            |              |            |            |           |           |          |
|--------------------|------------|--------------|------------|------------|-----------|-----------|----------|
| ENSGALG00000016455 | 36148,3013 | -2,034647249 | 0,14156144 | -14,372892 | 7,66E-47  | 3,07E-44  | GREB1    |
| ENSGALG00000015332 | 1189,98649 | -2,044938557 | 0,2318737  | -8,8191915 | 1,15E-18  | 8,09E-17  | CPLX1    |
| ENSGALG00000001608 | 473,981577 | -2,081100043 | 0,22971307 | -9,059563  | 1,31E-19  | 1,03E-17  | UNC5D    |
| ENSGALG00000006797 | 719,73345  | -2,093089949 | 0,18254835 | -11,465949 | 1,96E-30  | 3,60E-28  | ADARB2   |
| ENSGALG00000005347 | 2547,96798 | -2,102469906 | 0,17281317 | -12,166144 | 4,71E-34  | 1,11E-31  | ADAMTS18 |
| ENSGALG00000005061 | 4294,17572 | -2,114741441 | 0,15753482 | -13,423962 | 4,38E-41  | 1,53E-38  | PPM1E    |
| ENSGALG00000006822 | 6099,69686 | -2,117548167 | 0,19086302 | -11,094596 | 1,33E-28  | 2,06E-26  | PCDH19   |
| ENSGALG00000002540 | 1690,5022  | -2,132167559 | 0,1444055  | -14,765141 | 2,46E-49  | 1,08E-46  |          |
| ENSGALG00000014872 | 706,849976 | -2,137267919 | 0,21173492 | -10,094074 | 5,87E-24  | 6,77E-22  | FGF10    |
| ENSGALG00000005000 | 10982,0355 | -2,158647655 | 0,15123051 | -14,27389  | 3,18E-46  | 1,24E-43  | COMTD1   |
| ENSGALG00000002816 | 1397,74927 | -2,170634895 | 0,17254974 | -12,579763 | 2,73E-36  | 7,28E-34  | STK10    |
| ENSGALG00000024083 | 2014,38425 | -2,175833689 | 0,16411916 | -13,257646 | 4,07E-40  | 1,39E-37  | C8orf4   |
| ENSGALG00000017244 | 1712,46975 | -2,189436741 | 0,14753276 | -14,840343 | 8,03E-50  | 3,65E-47  | PRSS23   |
| ENSGALG00000012106 | 326,650164 | -2,236831516 | 0,28466041 | -7,8578946 | 3,91E-15  | 1,87E-13  | SCTR     |
| ENSGALG00000005689 | 443,468063 | -2,271345118 | 0,23720344 | -9,575515  | 1,01E-21  | 9,14E-20  | Pax-2    |
| ENSGALG00000000600 | 217,113311 | -2,27272638  | 0,28275559 | -8,0377769 | 9,15E-16  | 4,85E-14  |          |
| ENSGALG00000019426 | 136,015643 | -2,280006749 | 0,30033938 | -7,5914345 | 3,16E-14  | 1,41E-12  |          |
| ENSGALG00000012594 | 465,978763 | -2,283939186 | 0,22484628 | -10,157781 | 3,06E-24  | 3,62E-22  | NTRK2    |
| ENSGALG00000012732 | 358,709185 | -2,298252682 | 0,22771061 | -10,092866 | 5,94E-24  | 6,80E-22  | PHACTR1  |
| ENSGALG00000004376 | 1102,6462  | -2,323750078 | 0,19821753 | -11,723232 | 9,69E-32  | 2,00E-29  | KCNJ2    |
| ENSGALG00000008118 | 2184,0618  | -2,340544818 | 0,13264091 | -17,645724 | 1,10E-69  | 1,15E-66  |          |
| ENSGALG00000010435 | 1040,62618 | -2,340611141 | 0,22142593 | -10,570628 | 4,08E-26  | 5,66E-24  | RASGRP3  |
| ENSGALG00000007346 | 9971,3513  | -2,361764382 | 0,15659212 | -15,082268 | 2,12E-51  | 1,11E-48  | KIAA1462 |
| ENSGALG00000017091 | 828,298355 | -2,363903034 | 0,17074536 | -13,844611 | 1,37E-43  | 5,05E-41  | FLT1     |
| ENSGALG00000012278 | 11240,1658 | -2,383840075 | 0,16389202 | -14,545187 | 6,27E-48  | 2,67E-45  |          |
| ENSGALG00000016785 | 93,1133081 | -2,405348378 | 0,32963393 | -7,2970291 | 2,94E-13  | 1,15E-11  | IL1RL1   |
| ENSGALG00000013033 | 107,445867 | -2,410715686 | 0,31956021 | -7,5438544 | 4,56E-14  | 1,97E-12  |          |
| ENSGALG00000007657 | 4917,86859 | -2,412172788 | 0,33438082 | -7,2138491 | 5,44E-13  | 2,06E-11  | CDX4     |
| ENSGALG00000012927 | 231,318015 | -2,419967236 | 0,26578914 | -9,1048386 | 8,64E-20  | 6,84E-18  |          |
| ENSGALG00000002183 | 431,198329 | -2,438499895 | 0,26607955 | -9,1645522 | 4,98E-20  | 4,08E-18  | PRR16    |
| ENSGALG00000015947 | 963,910906 | -2,438977585 | 0,18916847 | -12,893151 | 4,92E-38  | 1,46E-35  |          |
| ENSGALG00000008893 | 301,746209 | -2,444595373 | 0,24691931 | -9,9003817 | 4,15E-23  | 4,31E-21  |          |
| ENSGALG00000008890 | 114,859766 | -2,449553325 | 0,32616483 | -7,5101701 | 5,91E-14  | 2,49E-12  | ADGRL4   |
| ENSGALG00000008905 | 317,218524 | -2,456637668 | 0,23731673 | -10,351726 | 4,11E-25  | 5,28E-23  | HABP2    |
| ENSGALG00000026663 | 524,422448 | -2,478656591 | 0,20922664 | -11,846755 | 2,24E-32  | 4,76E-30  | CX3CL1   |
| ENSGALG00000012623 | 104,28468  | -2,482707417 | 0,32178291 | -7,7154733 | 1,21E-14  | 5,58E-13  |          |
| ENSGALG00000015826 | 274,530912 | -2,484029553 | 0,31827956 | -7,8045526 | 5,97E-15  | 2,81E-13  | HTR1E    |
| ENSGALG00000010224 | 221,988072 | -2,486198557 | 0,29117325 | -8,5385541 | 1,36E-17  | 8,83E-16  |          |
| ENSGALG00000007940 | 128,052277 | -2,542363859 | 0,32047998 | -7,9329879 | 2,14E-15  | 1,07E-13  |          |
| ENSGALG00000001560 | 195,37323  | -2,555527127 | 0,33829668 | -7,5541005 | 4,22E-14  | 1,83E-12  |          |
| ENSGALG00000008581 | 16731,9435 | -2,566439645 | 0,14745274 | -17,405167 | 7,54E-68  | 5,70E-65  | DUSP5    |
| ENSGALG00000016784 | 1039,85153 | -2,607549769 | 0,17414233 | -14,97367  | 1,09E-50  | 5,50E-48  |          |
| ENSGALG00000006112 | 988,653043 | -2,692857061 | 0,18990629 | -14,179926 | 1,22E-45  | 4,61E-43  | SCN5A    |
| ENSGALG00000016154 | 140,890158 | -2,742713554 | 0,30649601 | -8,948611  | 3,60E-19  | 2,71E-17  | ARC      |
| ENSGALG00000016145 | 1265,10116 | -2,754137035 | 0,17459535 | -15,774401 | 4,67E-56  | 2,76E-53  |          |
| ENSGALG00000011099 | 581,916765 | -2,760215905 | 0,26996697 | -10,224273 | 1,54E-24  | 1,88E-22  | FAP      |
| ENSGALG00000005209 | 4151,24313 | -2,791291062 | 0,34877784 | -8,0030631 | 1,21E-15  | 6,28E-14  | AQP1     |
| ENSGALG00000011562 | 1031,63999 | -2,817896047 | 0,18091223 | -15,576039 | 1,06E-54  | 6,01E-52  | PARK2    |
| ENSGALG00000007656 | 17151,759  | -2,823200316 | 0,30126808 | -9,3710569 | 7,18E-21  | 6,11E-19  |          |
| ENSGALG00000012051 | 829,367255 | -2,878544854 | 0,24824835 | -11,595424 | 4,35E-31  | 8,22E-29  |          |
| ENSGALG00000028250 | 102,796791 | -2,884651456 | 0,33080912 | -8,7199877 | 2,78E-18  | 1,88E-16  | ANKRD22  |
| ENSGALG00000007701 | 2491,57183 | -2,906313035 | 0,16540669 | -17,57071  | 4,13E-69  | 3,75E-66  | B3GNT7   |
| ENSGALG00000014984 | 5902,58959 | -2,931476354 | 0,14956936 | -19,599445 | 1,56E-85  | 3,04E-82  | F2RL1    |
| ENSGALG00000009704 | 18346,8673 | -2,934403789 | 0,16761639 | -17,506664 | 1,27E-68  | 1,02E-65  | CHST15   |
| ENSGALG00000016140 | 355,674118 | -2,998033733 | 0,24925729 | -12,027868 | 2,54E-33  | 5,76E-31  | FAM3B    |
| ENSGALG00000015358 | 3246,18076 | -3,063209848 | 0,14576096 | -21,015297 | 4,75E-98  | 1,29E-94  | MYH15    |
| ENSGALG00000002562 | 2027,1289  | -3,12939254  | 0,17645164 | -17,735129 | 2,25E-70  | 2,55E-67  | ARAP3    |
| ENSGALG00000007538 | 106,892168 | -3,275953369 | 0,34614117 | -9,4642118 | 2,96E-21  | 2,60E-19  |          |
| ENSGALG00000022962 | 106,156937 | -3,362304357 | 0,3346563  | -10,047037 | 9,47E-24  | 1,06E-21  |          |
| ENSGALG00000002594 | 1003,24058 | -3,661637709 | 0,2050909  | -17,853731 | 2,70E-71  | 3,35E-68  | TFPI     |
| ENSGALG00000013624 | 4838,43058 | -3,6799039   | 0,14627576 | -25,157305 | 1,18E-139 | 5,34E-136 |          |
| ENSGALG00000006421 | 916,754331 | -3,742853665 | 0,23704674 | -15,789517 | 3,67E-56  | 2,27E-53  | SLC16A12 |

|                    |            |              |            |            |           |           |         |
|--------------------|------------|--------------|------------|------------|-----------|-----------|---------|
| ENSGALG00000020359 | 246,794372 | -3,821393345 | 0,28450232 | -13,431853 | 3,93E-41  | 1,41E-38  | SIX6    |
| ENSGALG00000003456 | 187,124669 | -3,934712358 | 0,32478027 | -12,114998 | 8,80E-34  | 2,03E-31  | CA12    |
| ENSGALG00000023379 | 453,271455 | -3,949811074 | 0,23138338 | -17,070418 | 2,46E-65  | 1,68E-62  | F2RL2   |
| ENSGALG00000016431 | 670,260054 | -4,37340061  | 0,23581962 | -18,545533 | 8,86E-77  | 1,34E-73  | Pax5B   |
| ENSGALG00000014994 | 310,707645 | -5,043766073 | 0,28682666 | -17,584718 | 3,23E-69  | 3,14E-66  | CRHBP   |
| ENSGALG00000016783 | 9121,10854 | -5,301446621 | 0,14503512 | -36,552847 | 1,61E-292 | 2,19E-288 | IL1R1   |
| ENSGALG00000004221 | 898,014845 | -5,338632777 | 0,26991661 | -19,778823 | 4,53E-87  | 1,03E-83  | IL22RA1 |
