# Supplementary material for: HOXB8 Counteracts MAPK/ERK Oncogenic Signaling in a Chicken Embryo Model of Neoplasia
Source: MDPI journal article supplement (doi:10.3390/ijms22168911), 2021-08-18
Supplement: s1 [file s1]

**Table S4:** MEK1ca+HOXB8 versus MEK1ca differentially regulated genes (False Discovery Rate (padj) <= 0.05).

| ID                 | baseMean  | log2FoldChange | lfcSE     | stat      | pvalue    | padj      | Symbol   |
|--------------------|-----------|----------------|-----------|-----------|-----------|-----------|----------|
| ENSGALG00000026853 | 1756,7605 | 5,751530736    | 0,1962667 | 29,304673 | 9,04E-189 | 6,16E-185 | FGF3     |
| ENSGALG00000011433 | 901,86118 | 4,353428748    | 0,1979937 | 21,987719 | 3,77E-107 | 1,28E-103 | VIL1     |
| ENSGALG00000009778 | 267,92271 | 4,29765073     | 0,2973351 | 14,453898 | 2,37E-47  | 9,77E-45  | HCLS1    |
| ENSGALG00000011582 | 175,17021 | 4,101846269    | 0,3182796 | 12,887557 | 5,29E-38  | 1,53E-35  | SLC17A8  |
| ENSGALG00000027742 | 312,3427  | 3,96517198     | 0,2663087 | 14,889379 | 3,86E-50  | 1,81E-47  | KLHL33   |
| ENSGALG00000028044 | 194,51466 | 3,90733608     | 0,3041023 | 12,848755 | 8,74E-38  | 2,48E-35  | ADMP     |
| ENSGALG00000002108 | 813,37463 | 3,799830272    | 0,1965883 | 19,328872 | 3,07E-83  | 5,23E-80  | EVPL     |
| ENSGALG00000021395 | 138,40693 | 3,681673719    | 0,3287873 | 11,197736 | 4,18E-29  | 6,70E-27  |          |
| ENSGALG00000001080 | 589,09501 | 3,620989798    | 0,2231106 | 16,229571 | 3,12E-59  | 2,02E-56  | NR5A1    |
| ENSGALG00000005292 | 233,99511 | 3,593969871    | 0,2819274 | 12,747854 | 3,20E-37  | 8,90E-35  | KLHL40   |
| ENSGALG00000028376 | 1521,8358 | 3,47510163     | 0,1982878 | 17,525546 | 9,15E-69  | 7,78E-66  | FGF19    |
| ENSGALG00000023843 | 120,84193 | 3,393126537    | 0,3307759 | 10,258084 | 1,09E-24  | 1,35E-22  | FRMD7    |
| ENSGALG00000006471 | 279,29896 | 3,309144864    | 0,2889251 | 11,453298 | 2,26E-30  | 4,04E-28  | SLCO2A1  |
| ENSGALG00000028304 | 118,7931  | 3,251722149    | 0,3347604 | 9,7135804 | 2,64E-22  | 2,58E-20  |          |
| ENSGALG00000004526 | 421,69106 | 3,217263436    | 0,2437389 | 13,199628 | 8,82E-40  | 2,93E-37  | TNR      |
| ENSGALG00000008069 | 109,41167 | 3,182915984    | 0,3413839 | 9,3235675 | 1,12E-20  | 9,51E-19  | CYP2J6L3 |
| ENSGALG00000004134 | 133,43428 | 3,164728278    | 0,3267271 | 9,6861515 | 3,45E-22  | 3,31E-20  | GLRA1    |
| ENSGALG00000012254 | 87,731989 | 3,162704218    | 0,3459847 | 9,1411679 | 6,18E-20  | 4,98E-18  | KCNJ4    |
| ENSGALG00000006944 | 469,14467 | 3,116432937    | 0,2398381 | 12,993902 | 1,32E-38  | 4,01E-36  |          |
| ENSGALG00000028612 | 103,60478 | 3,070056483    | 0,3464928 | 8,8603749 | 7,97E-19  | 5,81E-17  | MYH1G    |
| ENSGALG00000005285 | 100,23743 | 2,996752626    | 0,3402533 | 8,8074179 | 1,28E-18  | 8,94E-17  | TBX4     |
| ENSGALG00000007335 | 107,29888 | 2,985281892    | 0,3405577 | 8,7658615 | 1,85E-18  | 1,28E-16  | KBTBD13  |
| ENSGALG00000001256 | 266,94499 | 2,963677659    | 0,2979331 | 9,9474608 | 2,59E-23  | 2,71E-21  | NLRC5    |
| ENSGALG00000016685 | 93,447456 | 2,945393761    | 0,3383685 | 8,7046936 | 3,18E-18  | 2,13E-16  | ASMT     |
| ENSGALG00000016721 | 160,3282  | 2,940591405    | 0,3042022 | 9,6665674 | 4,18E-22  | 3,93E-20  | PLCXD1   |
| ENSGALG00000026167 | 171,61409 | 2,925839411    | 0,3177833 | 9,2070258 | 3,35E-20  | 2,78E-18  | PIK3R5   |
| ENSGALG00000002926 | 76,22895  | 2,900739748    | 0,3500461 | 8,2867354 | 1,16E-16  | 6,86E-15  | DBH      |
| ENSGALG00000004700 | 97,840654 | 2,88173675     | 0,3343593 | 8,6186822 | 6,77E-18  | 4,45E-16  | NCF2     |
| ENSGALG00000016722 | 73,43112  | 2,829128945    | 0,3527315 | 8,0206314 | 1,05E-15  | 5,52E-14  | RGNL     |
| ENSGALG00000012830 | 227,95073 | 2,760094911    | 0,2851044 | 9,6809972 | 3,63E-22  | 3,44E-20  | IRF4     |
| ENSGALG00000027247 | 97,436329 | 2,75413056     | 0,3327446 | 8,2770098 | 1,26E-16  | 7,41E-15  | EOMES    |
| ENSGALG00000002823 | 276,03395 | 2,746001119    | 0,2565217 | 10,70475  | 9,67E-27  | 1,39E-24  |          |
| ENSGALG00000006614 | 540,92661 | 2,721769719    | 0,2601033 | 10,464189 | 1,26E-25  | 1,70E-23  | TECTA    |
| ENSGALG00000006744 | 446,95073 | 2,709854582    | 0,2639156 | 10,267881 | 9,83E-25  | 1,23E-22  | MUC2     |
| ENSGALG00000020485 | 352,82533 | 2,707785881    | 0,2864956 | 9,4514033 | 3,34E-21  | 2,90E-19  |          |
| ENSGALG00000015322 | 401,95748 | 2,694878773    | 0,2468716 | 10,916117 | 9,65E-28  | 1,43E-25  | IMPG2    |
| ENSGALG00000025886 | 234,93273 | 2,681244585    | 0,2769653 | 9,6807963 | 3,64E-22  | 3,44E-20  | SUSD3    |
| ENSGALG00000013922 | 145,69265 | 2,651462599    | 0,3144764 | 8,4313551 | 3,42E-17  | 2,11E-15  | ZP1      |
| ENSGALG00000026590 | 256,39028 | 2,649598672    | 0,2655285 | 9,9785844 | 1,89E-23  | 2,01E-21  | KLF13    |
| ENSGALG00000016325 | 669,81495 | 2,632246576    | 0,2229691 | 11,805432 | 3,66E-32  | 7,66E-30  | GSTA3    |
| ENSGALG00000026627 | 138,55984 | 2,620280418    | 0,325291  | 8,0551894 | 7,94E-16  | 4,29E-14  |          |
| ENSGALG00000001780 | 98,3971   | 2,613843166    | 0,3358627 | 7,7824758 | 7,11E-15  | 3,32E-13  | PROC     |
| ENSGALG00000002987 | 118,45636 | 2,607861451    | 0,3206775 | 8,1323505 | 4,21E-16  | 2,34E-14  | SERPINF2 |
| ENSGALG00000027059 | 200,39104 | 2,606173672    | 0,2890015 | 9,0178542 | 1,92E-19  | 1,48E-17  |          |
| ENSGALG00000023821 | 140,66943 | 2,605691323    | 0,3149662 | 8,2729246 | 1,31E-16  | 7,64E-15  | DHX58    |
| ENSGALG00000006032 | 296,77177 | 2,599165832    | 0,2722516 | 9,5469253 | 1,34E-21  | 1,19E-19  | IL13RA1  |
| ENSGALG00000002960 | 103,93249 | 2,574242623    | 0,3355369 | 7,6720094 | 1,69E-14  | 7,76E-13  | HMGCS2   |
| ENSGALG00000010841 | 110,20084 | 2,5587632      | 0,3321477 | 7,7036919 | 1,32E-14  | 6,10E-13  |          |
| ENSGALG00000002829 | 649,13345 | 2,553310959    | 0,2049577 | 12,457744 | 1,27E-35  | 3,20E-33  | SCARF1   |
| ENSGALG00000021198 | 61,503229 | 2,552636185    | 0,3511007 | 7,2703825 | 3,58E-13  | 1,39E-11  |          |
| ENSGALG00000015141 | 58,962649 | 2,548558749    | 0,3520748 | 7,2386848 | 4,53E-13  | 1,74E-11  | GDA      |
| ENSGALG00000005122 | 338,26914 | 2,528381619    | 0,242755  | 10,415364 | 2,11E-25  | 2,79E-23  | MYO1H    |
| ENSGALG00000010145 | 278,24749 | 2,508391386    | 0,3014197 | 8,3219221 | 8,65E-17  | 5,15E-15  | MDGA1    |
| ENSGALG00000014372 | 67,978413 | 2,495880293    | 0,3492839 | 7,1457073 | 8,95E-13  | 3,29E-11  | SLC34A2  |
| ENSGALG00000029144 | 72,328613 | 2,46980754     | 0,3488262 | 7,0803381 | 1,44E-12  | 5,17E-11  |          |
| ENSGALG00000021399 | 89,329511 | 2,464358792    | 0,336861  | 7,3156547 | 2,56E-13  | 1,01E-11  | ABCA8    |
| ENSGALG00000001111 | 752,30516 | 2,451755117    | 0,2113059 | 11,602872 | 3,98E-31  | 7,64E-29  | DNAH9    |
| ENSGALG00000012985 | 261,61267 | 2,44205884     | 0,2658681 | 9,185228  | 4,11E-20  | 3,39E-18  | SLC6A13  |
| ENSGALG00000008105 | 47,87761  | 2,404806479    | 0,3539579 | 6,7940461 | 1,09E-11  | 3,44E-10  | CYP2J6L2 |

|                     |           |             |           |           |          |          |              |
|---------------------|-----------|-------------|-----------|-----------|----------|----------|--------------|
| ENSGALG00000012812  | 176,06145 | 2,39422427  | 0,2959701 | 8,089412  | 6,00E-16 | 3,29E-14 | SVOPL        |
| ENSGALG00000002638  | 117,91406 | 2,388124012 | 0,3283139 | 7,2739052 | 3,49E-13 | 1,35E-11 | SRRL         |
| ENSGALG000000002318 | 63,409663 | 2,376044719 | 0,3494777 | 6,7988449 | 1,05E-11 | 3,33E-10 | LVRN         |
| ENSGALG000000002015 | 214,32321 | 2,374226325 | 0,2864093 | 8,2896265 | 1,14E-16 | 6,72E-15 | SNCG         |
| ENSGALG000000026256 | 199,83767 | 2,357924834 | 0,3332057 | 7,0764832 | 1,48E-12 | 5,30E-11 |              |
| ENSGALG000000007395 | 402,67751 | 2,356587415 | 0,2261671 | 10,419672 | 2,02E-25 | 2,69E-23 | ABCC2        |
| ENSGALG000000002046 | 463,72169 | 2,341658671 | 0,2422889 | 9,6647372 | 4,26E-22 | 3,97E-20 | SYT15        |
| ENSGALG000000007340 | 53,630639 | 2,338672246 | 0,3529687 | 6,6257213 | 3,46E-11 | 1,01E-09 | TMPRSS5      |
| ENSGALG000000023934 | 52,57595  | 2,337998666 | 0,3538351 | 6,6075938 | 3,91E-11 | 1,12E-09 |              |
| ENSGALG000000028341 | 324,38787 | 2,327426751 | 0,2360199 | 9,8611477 | 6,13E-23 | 6,23E-21 | MADCAM1      |
| ENSGALG000000002260 | 279,41384 | 2,326075861 | 0,254913  | 9,1249794 | 7,17E-20 | 5,71E-18 | CISH         |
| ENSGALG000000006402 | 199,28187 | 2,315345967 | 0,2776938 | 8,3377677 | 7,57E-17 | 4,56E-15 | NRROS        |
| ENSGALG000000008709 | 98,437291 | 2,291854243 | 0,3268395 | 7,0121701 | 2,35E-12 | 8,17E-11 | MCOLN3       |
| ENSGALG000000013006 | 357,98483 | 2,275189997 | 0,2579484 | 8,8203283 | 1,14E-18 | 8,05E-17 | ROPN1L       |
| ENSGALG000000006992 | 182,22358 | 2,270300547 | 0,2984455 | 7,6070847 | 2,80E-14 | 1,27E-12 | MMP9         |
| ENSGALG000000011113 | 527,00037 | 2,26759493  | 0,2713629 | 8,356319  | 6,47E-17 | 3,93E-15 | SGIP1        |
| ENSGALG000000023577 | 321,7197  | 2,257832359 | 0,2669922 | 8,4565486 | 2,75E-17 | 1,74E-15 | TBX2         |
| ENSGALG000000016852 | 56,030921 | 2,256531595 | 0,3516922 | 6,416211  | 1,40E-10 | 3,74E-09 | TNFSF13B     |
| ENSGALG000000027617 | 219,45804 | 2,255993416 | 0,2851339 | 7,9120503 | 2,53E-15 | 1,25E-13 | RP11-385J1.3 |
| ENSGALG000000003677 | 113,60782 | 2,250263529 | 0,3449597 | 6,5232654 | 6,88E-11 | 1,92E-09 | NTNG2        |
| ENSGALG000000023742 | 249,60413 | 2,24719921  | 0,2820489 | 7,9674098 | 1,62E-15 | 8,26E-14 |              |
| ENSGALG000000001589 | 111,25767 | 2,246033051 | 0,3441573 | 6,526182  | 6,75E-11 | 1,89E-09 | INPP5D       |
| ENSGALG000000016369 | 952,12228 | 2,242110682 | 0,1770401 | 12,664423 | 9,31E-37 | 2,54E-34 | FBXO32       |
| ENSGALG000000027703 | 404,86881 | 2,238234147 | 0,2535546 | 8,8274262 | 1,07E-18 | 7,64E-17 |              |
| ENSGALG000000003389 | 248,60083 | 2,230534118 | 0,2705236 | 8,2452465 | 1,65E-16 | 9,51E-15 | IFI30        |
| ENSGALG000000015244 | 123,74828 | 2,228224412 | 0,3204639 | 6,9531211 | 3,57E-12 | 1,20E-10 | TBX19        |
| ENSGALG000000001857 | 255,91037 | 2,203449137 | 0,2595043 | 8,4909939 | 2,05E-17 | 1,31E-15 | FAM132A      |
| ENSGALG000000019861 | 47,604267 | 2,196772492 | 0,3539452 | 6,2065321 | 5,42E-10 | 1,33E-08 |              |
| ENSGALG000000008514 | 959,21197 | 2,19329695  | 0,1769465 | 12,395254 | 2,77E-35 | 6,86E-33 | DLL4         |
| ENSGALG000000021714 | 88,405928 | 2,185372855 | 0,3343395 | 6,5363894 | 6,30E-11 | 1,78E-09 | PADI1        |
| ENSGALG000000009499 | 136,98531 | 2,185164296 | 0,3152046 | 6,932526  | 4,13E-12 | 1,37E-10 | NPY5R        |
| ENSGALG000000026467 | 67,174686 | 2,184133106 | 0,3474873 | 6,2855052 | 3,27E-10 | 8,22E-09 | MESP1        |
| ENSGALG000000027532 | 181,56516 | 2,181261094 | 0,3353331 | 6,5047583 | 7,78E-11 | 2,16E-09 | COLEC11      |
| ENSGALG000000002817 | 43,721989 | 2,174112777 | 0,3531294 | 6,1567025 | 7,43E-10 | 1,79E-08 | CPLX4        |
| ENSGALG000000028339 | 572,22079 | 2,143746023 | 0,2535634 | 8,4544787 | 2,80E-17 | 1,76E-15 | AMIGO3       |
| ENSGALG000000003548 | 717,97931 | 2,131798574 | 0,1846233 | 11,546747 | 7,67E-31 | 1,43E-28 | BAIAP2L1     |
| ENSGALG000000029168 | 574,12283 | 2,125452005 | 0,2633801 | 8,069905  | 7,04E-16 | 3,85E-14 | TMEM27       |
| ENSGALG000000005062 | 695,37715 | 2,112402161 | 0,1891794 | 11,166133 | 5,97E-29 | 9,35E-27 | FOXN4        |
| ENSGALG000000001879 | 730,68274 | 2,106018407 | 0,1838916 | 11,4525   | 2,28E-30 | 4,04E-28 | GRID1        |
| ENSGALG000000028551 | 2508,945  | 2,105237568 | 0,1772334 | 11,878334 | 1,53E-32 | 3,32E-30 |              |
| ENSGALG000000001696 | 267,69848 | 2,102610472 | 0,2564004 | 8,2004945 | 2,39E-16 | 1,36E-14 | SAG          |
| ENSGALG000000008275 | 48,571485 | 2,098791425 | 0,3539549 | 5,9295439 | 3,04E-09 | 6,67E-08 | MESP2        |
| ENSGALG000000021567 | 284,86115 | 2,081191963 | 0,246615  | 8,4390326 | 3,20E-17 | 1,99E-15 | EPHA8        |
| ENSGALG000000001874 | 67,244987 | 2,080511409 | 0,3538919 | 5,8789453 | 4,13E-09 | 8,88E-08 |              |
| ENSGALG000000028654 | 92,92864  | 2,074935686 | 0,3457662 | 6,0009788 | 1,96E-09 | 4,45E-08 |              |
| ENSGALG000000006260 | 56,956461 | 2,062296513 | 0,3527945 | 5,8456027 | 5,05E-09 | 1,06E-07 | KLHL30       |
| ENSGALG000000007570 | 256,24389 | 2,055518081 | 0,2571315 | 7,9940356 | 1,31E-15 | 6,73E-14 | KLF8         |
| ENSGALG000000019527 | 38,897028 | 2,052781357 | 0,3521947 | 5,8285416 | 5,59E-09 | 1,16E-07 | SLC6A19      |
| ENSGALG000000000656 | 95,76214  | 2,036711968 | 0,3414768 | 5,964423  | 2,46E-09 | 5,51E-08 | TMEM81       |
| ENSGALG000000007104 | 125,61776 | 2,032418742 | 0,3200563 | 6,3501909 | 2,15E-10 | 5,59E-09 | LRRC15       |
| ENSGALG000000026541 | 175,99093 | 2,028653787 | 0,2976967 | 6,8144995 | 9,46E-12 | 3,00E-10 |              |
| ENSGALG000000014203 | 138,12328 | 2,025939839 | 0,3005882 | 6,7399175 | 1,58E-11 | 4,87E-10 | PARVG        |
| ENSGALG000000020195 | 143,5922  | 2,021370929 | 0,3033718 | 6,6630159 | 2,68E-11 | 7,92E-10 | DMP1         |
| ENSGALG000000012204 | 102,97928 | 2,019423041 | 0,32821   | 6,1528374 | 7,61E-10 | 1,83E-08 | FAM20CL      |
| ENSGALG000000005797 | 87,794264 | 2,014484064 | 0,3341899 | 6,0279615 | 1,66E-09 | 3,83E-08 | COL20A1      |
| ENSGALG000000000437 | 37,093294 | 2,013731373 | 0,3518291 | 5,7236071 | 1,04E-08 | 2,04E-07 |              |
| ENSGALG000000002931 | 53,692699 | 2,013598707 | 0,3534025 | 5,6977488 | 1,21E-08 | 2,37E-07 | REG4         |
| ENSGALG000000006273 | 107,39879 | 2,011386223 | 0,3229782 | 6,2276225 | 4,74E-10 | 1,16E-08 | MYLK2        |
| ENSGALG000000000722 | 46,564331 | 2,006522785 | 0,3537549 | 5,6720703 | 1,41E-08 | 2,72E-07 |              |
| ENSGALG000000028147 | 229,82466 | 2,001096858 | 0,2664367 | 7,5105891 | 5,89E-14 | 2,49E-12 | CTSK         |
| ENSGALG000000004248 | 56,901253 | 1,998749091 | 0,352065  | 5,6772168 | 1,37E-08 | 2,65E-07 | TACR2        |
| ENSGALG000000003075 | 93,078833 | 1,997443704 | 0,3325728 | 6,0060344 | 1,90E-09 | 4,34E-08 | SLC34A1      |

|                    |           |             |           |           |          |          |              |
|--------------------|-----------|-------------|-----------|-----------|----------|----------|--------------|
| ENSGALG00000001571 | 57,11691  | 1,994083312 | 0,35177   | 5,6687129 | 1,44E-08 | 2,77E-07 | MYO1F        |
| ENSGALG00000010458 | 184,3782  | 1,990178775 | 0,2802188 | 7,1022313 | 1,23E-12 | 4,45E-11 | NOXRED1      |
| ENSGALG00000011889 | 230,92302 | 1,988400853 | 0,2676563 | 7,4289338 | 1,09E-13 | 4,48E-12 | RP11-47I22.4 |
| ENSGALG00000010924 | 209,96874 | 1,986898996 | 0,2874232 | 6,9127999 | 4,75E-12 | 1,56E-10 | NFIA         |
| ENSGALG00000015846 | 313,73062 | 1,982793598 | 0,2465855 | 8,0409991 | 8,91E-16 | 4,78E-14 | SNAP91       |
| ENSGALG00000006835 | 112,62877 | 1,974805269 | 0,3171624 | 6,2264797 | 4,77E-10 | 1,17E-08 | TNNC2        |
| ENSGALG00000013253 | 157,86205 | 1,972349113 | 0,3198156 | 6,1671455 | 6,95E-10 | 1,68E-08 | INSRR        |
| ENSGALG00000009302 | 367,16268 | 1,971912015 | 0,2879884 | 6,8471929 | 7,53E-12 | 2,42E-10 | EMX2         |
| ENSGALG00000004414 | 101,95784 | 1,959564216 | 0,3212322 | 6,1001479 | 1,06E-09 | 2,50E-08 | LUZP2        |
| ENSGALG00000009489 | 127,74049 | 1,956908773 | 0,320476  | 6,1062578 | 1,02E-09 | 2,42E-08 | FSTL5        |
| ENSGALG00000005822 | 147,05646 | 1,951526015 | 0,3027027 | 6,447005  | 1,14E-10 | 3,07E-09 | KCNQ2        |
| ENSGALG00000027147 | 228,05825 | 1,950896881 | 0,2801413 | 6,9639743 | 3,31E-12 | 1,13E-10 | SUB1L1       |
| ENSGALG00000021869 | 645,94199 | 1,950468731 | 0,2435545 | 8,0083473 | 1,16E-15 | 6,04E-14 | PODN         |
| ENSGALG00000028975 | 532,93063 | 1,945491073 | 0,2058434 | 9,4513148 | 3,35E-21 | 2,90E-19 | FRMPD3       |
| ENSGALG00000007666 | 61,970313 | 1,945055405 | 0,3514319 | 5,5346576 | 3,12E-08 | 5,56E-07 | KCNIP2       |
| ENSGALG00000021656 | 37,511821 | 1,943986445 | 0,3507973 | 5,5416231 | 3,00E-08 | 5,37E-07 | PTPN22       |
| ENSGALG00000008188 | 164,94281 | 1,939910796 | 0,2907086 | 6,6730415 | 2,51E-11 | 7,46E-10 | TRIM36       |
| ENSGALG00000010362 | 56,130567 | 1,930559856 | 0,3538155 | 5,456402  | 4,86E-08 | 8,33E-07 | SUCNR1       |
| ENSGALG00000000560 | 58,758167 | 1,925570368 | 0,353335  | 5,4497022 | 5,05E-08 | 8,61E-07 | PI16         |
| ENSGALG00000015021 | 44,681844 | 1,923323022 | 0,3539578 | 5,4337643 | 5,52E-08 | 9,36E-07 | TMEM174      |
| ENSGALG00000015551 | 1931,1282 | 1,921428632 | 0,1720637 | 11,16696  | 5,92E-29 | 9,35E-27 | GRIN3A       |
| ENSGALG00000010867 | 80,266993 | 1,919026004 | 0,3407804 | 5,6312691 | 1,79E-08 | 3,37E-07 | TACSTD2      |
| ENSGALG00000001004 | 271,27145 | 1,914258624 | 0,2596069 | 7,3736827 | 1,66E-13 | 6,69E-12 | MPO          |
| ENSGALG00000011347 | 48,911798 | 1,909599526 | 0,3539061 | 5,3957801 | 6,82E-08 | 1,14E-06 | IHH          |
| ENSGALG00000006413 | 117,16579 | 1,90767902  | 0,3112895 | 6,1283111 | 8,88E-10 | 2,11E-08 | CEMIP        |
| ENSGALG00000003836 | 138,24842 | 1,907173269 | 0,3450544 | 5,5271675 | 3,25E-08 | 5,78E-07 | RBM44        |
| ENSGALG00000007345 | 111,97256 | 1,905774604 | 0,3245679 | 5,8717287 | 4,31E-09 | 9,20E-08 | TMEM114      |
| ENSGALG00000008701 | 97,136553 | 1,905747917 | 0,3400514 | 5,6042938 | 2,09E-08 | 3,87E-07 | XDHI         |
| ENSGALG00000010853 | 484,76878 | 1,904256394 | 0,2172677 | 8,7645617 | 1,88E-18 | 1,29E-16 | C8B          |
| ENSGALG00000000221 | 51,676802 | 1,900065815 | 0,35396   | 5,3680237 | 7,96E-08 | 1,31E-06 | PROM2        |
| ENSGALG00000001617 | 1078,3293 | 1,898502237 | 0,2123138 | 8,9419639 | 3,82E-19 | 2,86E-17 | CAMKK1       |
| ENSGALG00000019290 | 78,123837 | 1,892925943 | 0,3496984 | 5,4130245 | 6,20E-08 | 1,04E-06 | SLC6A12      |
| ENSGALG00000009265 | 88,174325 | 1,891791729 | 0,3459146 | 5,4689565 | 4,53E-08 | 7,80E-07 | KCNK18       |
| ENSGALG00000003923 | 2335,3387 | 1,889033194 | 0,1503705 | 12,562527 | 3,39E-36 | 8,88E-34 | COL6A3       |
| ENSGALG00000008995 | 104,54637 | 1,882652598 | 0,3282959 | 5,7346211 | 9,77E-09 | 1,93E-07 | MAMDC4       |
| ENSGALG00000000544 | 347,72624 | 1,877518925 | 0,2328757 | 8,0623238 | 7,49E-16 | 4,08E-14 |              |
| ENSGALG00000007706 | 86,703491 | 1,877381913 | 0,3347682 | 5,6080061 | 2,05E-08 | 3,82E-07 | FGF8         |
| ENSGALG00000015347 | 73,173206 | 1,876981559 | 0,3445279 | 5,4479816 | 5,09E-08 | 8,66E-07 | ZPLD1        |
| ENSGALG00000009078 | 124,06611 | 1,868595491 | 0,3338294 | 5,5974556 | 2,18E-08 | 4,01E-07 | GALNT14      |
| ENSGALG00000000899 | 303,59428 | 1,867380532 | 0,252928  | 7,3830526 | 1,55E-13 | 6,29E-12 | PSD2         |
| ENSGALG00000023459 | 62,523363 | 1,863475253 | 0,3506341 | 5,314586  | 1,07E-07 | 1,71E-06 | MC1R         |
| ENSGALG00000013953 | 153,51081 | 1,853929495 | 0,316158  | 5,8639338 | 4,52E-09 | 9,60E-08 | TACR1        |
| ENSGALG00000020316 | 66,987938 | 1,852228829 | 0,3437054 | 5,3890016 | 7,09E-08 | 1,17E-06 | IL13RA2      |
| ENSGALG00000014770 | 4689,6836 | 1,850573228 | 0,1917177 | 9,6525964 | 4,79E-22 | 4,41E-20 | EPB41L3      |
| ENSGALG00000015406 | 32,824277 | 1,850052547 | 0,3495416 | 5,2927962 | 1,20E-07 | 1,90E-06 | MOS          |
| ENSGALG00000007047 | 78,987356 | 1,844593336 | 0,3380656 | 5,4563178 | 4,86E-08 | 8,33E-07 | GAL          |
| ENSGALG00000011421 | 155,78727 | 1,840566258 | 0,2941943 | 6,2562953 | 3,94E-10 | 9,81E-09 | HAL          |
| ENSGALG00000003751 | 52,948026 | 1,835104614 | 0,3538037 | 5,186787  | 2,14E-07 | 3,22E-06 | ASAH2        |
| ENSGALG00000021693 | 69,312923 | 1,830329106 | 0,3430516 | 5,3354333 | 9,53E-08 | 1,54E-06 |              |
| ENSGALG00000005634 | 92,232146 | 1,826798031 | 0,3274114 | 5,5795183 | 2,41E-08 | 4,40E-07 | CRYBA4       |
| ENSGALG00000005644 | 54,639892 | 1,819377424 | 0,3504577 | 5,1914323 | 2,09E-07 | 3,15E-06 | MYO1G        |
| ENSGALG00000029006 | 89,819678 | 1,803532169 | 0,3296621 | 5,4708508 | 4,48E-08 | 7,73E-07 | SYPL1        |
| ENSGALG00000010126 | 116,19587 | 1,799221778 | 0,3298899 | 5,4540074 | 4,92E-08 | 8,42E-07 | BEST4        |
| ENSGALG00000019361 | 44,228613 | 1,792121861 | 0,3538597 | 5,0644988 | 4,09E-07 | 5,78E-06 | FAM19A2      |
| ENSGALG00000020982 | 53,872261 | 1,789263062 | 0,3513204 | 5,092966  | 3,53E-07 | 5,05E-06 | BPIFB3       |
| ENSGALG00000004841 | 236,70913 | 1,788099107 | 0,2763588 | 6,4702084 | 9,79E-11 | 2,66E-09 | APLNR        |
| ENSGALG00000008845 | 211,0907  | 1,784489653 | 0,2697983 | 6,6141623 | 3,74E-11 | 1,08E-09 | HAO1         |
| ENSGALG00000023354 | 87,321322 | 1,782015396 | 0,3447223 | 5,1694224 | 2,35E-07 | 3,49E-06 | FSCN2        |
| ENSGALG00000010364 | 75,712359 | 1,777216343 | 0,3496501 | 5,0828426 | 3,72E-07 | 5,29E-06 | AADACL2      |
| ENSGALG00000027090 | 122,23539 | 1,772101833 | 0,3238631 | 5,4717629 | 4,46E-08 | 7,70E-07 |              |
| ENSGALG00000005043 | 168,0345  | 1,771501032 | 0,2886982 | 6,13617   | 8,45E-10 | 2,02E-08 | ACACB        |
| ENSGALG00000005747 | 39,000743 | 1,767653479 | 0,3536042 | 4,998961  | 5,76E-07 | 7,89E-06 |              |

|                    |           |             |           |           |          |          |           |
|--------------------|-----------|-------------|-----------|-----------|----------|----------|-----------|
| ENSGALG00000014252 | 107,13553 | 1,765576737 | 0,346339  | 5,0978281 | 3,44E-07 | 4,94E-06 |           |
| ENSGALG00000006007 | 80,52031  | 1,763247242 | 0,3431655 | 5,1381839 | 2,77E-07 | 4,06E-06 | SAMD10    |
| ENSGALG00000000630 | 44,986023 | 1,762139369 | 0,352772  | 4,9951231 | 5,88E-07 | 8,02E-06 | HAS3      |
| ENSGALG00000013971 | 623,6268  | 1,754983652 | 0,2217786 | 7,9132227 | 2,51E-15 | 1,24E-13 | SGK1      |
| ENSGALG00000025804 | 57,829823 | 1,753854275 | 0,3486801 | 5,0299803 | 4,91E-07 | 6,84E-06 | CLCN2     |
| ENSGALG00000016233 | 282,39076 | 1,751740847 | 0,2591609 | 6,7592786 | 1,39E-11 | 4,28E-10 | TG        |
| ENSGALG00000000299 | 146,62252 | 1,750555222 | 0,3173752 | 5,5157274 | 3,47E-08 | 6,13E-07 | PKP1      |
| ENSGALG00000015154 | 107,54458 | 1,749162012 | 0,3192627 | 5,4787551 | 4,28E-08 | 7,43E-07 | TRPM6     |
| ENSGALG00000028801 | 326,04496 | 1,749152851 | 0,2317152 | 7,548717  | 4,40E-14 | 1,90E-12 | YPEL2     |
| ENSGALG00000003103 | 147,01296 | 1,745350116 | 0,2934725 | 5,9472356 | 2,73E-09 | 6,09E-08 | MST1R     |
| ENSGALG00000010408 | 48,693762 | 1,74244975  | 0,3525174 | 4,9428754 | 7,70E-07 | 1,02E-05 | OPN4-1    |
| ENSGALG00000016580 | 156,41685 | 1,740943756 | 0,3137577 | 5,5486878 | 2,88E-08 | 5,20E-07 | SCARA5    |
| ENSGALG00000020779 | 287,43405 | 1,737619419 | 0,2447032 | 7,1009277 | 1,24E-12 | 4,48E-11 |           |
| ENSGALG00000015544 | 64,576519 | 1,719200832 | 0,3511965 | 4,895268  | 9,82E-07 | 1,28E-05 | ALDOB     |
| ENSGALG00000015305 | 121,8353  | 1,715527315 | 0,3092461 | 5,547451  | 2,90E-08 | 5,21E-07 | NR2E1     |
| ENSGALG00000008926 | 1594,7541 | 1,713961304 | 0,1563378 | 10,963191 | 5,74E-28 | 8,69E-26 | CADPS2    |
| ENSGALG00000002957 | 403,40008 | 1,713056332 | 0,2361807 | 7,2531612 | 4,07E-13 | 1,57E-11 | SLC12A3   |
| ENSGALG00000017212 | 76,54735  | 1,710911672 | 0,3424068 | 4,9967228 | 5,83E-07 | 7,97E-06 | GPR83     |
| ENSGALG00000004827 | 60,764569 | 1,70800582  | 0,3466264 | 4,9275126 | 8,33E-07 | 1,10E-05 | PAK6      |
| ENSGALG00000003242 | 570,22011 | 1,707949225 | 0,2101315 | 8,1280036 | 4,36E-16 | 2,42E-14 | STAR      |
| ENSGALG00000001912 | 146,49438 | 1,699528733 | 0,3012842 | 5,6409491 | 1,69E-08 | 3,21E-07 | EPHA10    |
| ENSGALG00000003003 | 42,669769 | 1,694427776 | 0,3520315 | 4,8132841 | 1,48E-06 | 1,86E-05 | CCL20     |
| ENSGALG00000016261 | 158,70666 | 1,693178751 | 0,3145024 | 5,3836747 | 7,30E-08 | 1,20E-06 | CYBB      |
| ENSGALG00000011007 | 1150,329  | 1,688733669 | 0,1907765 | 8,8518972 | 8,60E-19 | 6,20E-17 | OSBPL3    |
| ENSGALG00000015117 | 149,51437 | 1,688648354 | 0,2954854 | 5,7148283 | 1,10E-08 | 2,15E-07 | DRD3      |
| ENSGALG00000012429 | 6013,8279 | 1,680823476 | 0,1520104 | 11,05729  | 2,02E-28 | 3,09E-26 | BMP4      |
| ENSGALG00000000458 | 427,66514 | 1,679795969 | 0,2174489 | 7,7250163 | 1,12E-14 | 5,20E-13 | TMPRSS9   |
| ENSGALG00000011622 | 28,65156  | 1,67904306  | 0,3460309 | 4,8522925 | 1,22E-06 | 1,56E-05 | MAS1      |
| ENSGALG00000016572 | 77,200694 | 1,678816771 | 0,3434432 | 4,8881939 | 1,02E-06 | 1,32E-05 | C3H8ORF80 |
| ENSGALG00000001084 | 353,56487 | 1,677708871 | 0,2418689 | 6,9364397 | 4,02E-12 | 1,34E-10 | ATP8B3    |
| ENSGALG00000026473 | 1522,1511 | 1,674638021 | 0,2112768 | 7,9262761 | 2,26E-15 | 1,13E-13 | CHST11    |
| ENSGALG00000008178 | 111,71167 | 1,67186128  | 0,3225826 | 5,1827379 | 2,19E-07 | 3,28E-06 | CYP2J2L5  |
| ENSGALG00000005140 | 240,21489 | 1,671709253 | 0,257977  | 6,48007   | 9,17E-11 | 2,52E-09 | RRAD      |
| ENSGALG00000001234 | 40,862653 | 1,668621796 | 0,3539185 | 4,7147069 | 2,42E-06 | 2,87E-05 | CETP      |
| ENSGALG00000006514 | 1126,0055 | 1,665636549 | 0,1751467 | 9,5099504 | 1,91E-21 | 1,69E-19 | FSTL4     |
| ENSGALG00000004936 | 57,472904 | 1,658043102 | 0,3494689 | 4,744466  | 2,09E-06 | 2,51E-05 | GLRA4     |
| ENSGALG00000028174 | 599,32727 | 1,656109672 | 0,2408103 | 6,877239  | 6,10E-12 | 1,98E-10 | SDPR      |
| ENSGALG00000011882 | 446,5677  | 1,655648124 | 0,2116439 | 7,8228016 | 5,17E-15 | 2,44E-13 | CDCP1     |
| ENSGALG00000020143 | 148,7819  | 1,654526791 | 0,3218985 | 5,1399029 | 2,75E-07 | 4,02E-06 | GABRG1    |
| ENSGALG00000027314 | 27,97681  | 1,648583002 | 0,3452618 | 4,7748783 | 1,80E-06 | 2,19E-05 | SAXO1     |
| ENSGALG00000019019 | 89,671454 | 1,647447024 | 0,3439031 | 4,7904393 | 1,66E-06 | 2,05E-05 | NTRK1     |
| ENSGALG00000026161 | 123,20926 | 1,647025641 | 0,3125278 | 5,2700132 | 1,36E-07 | 2,13E-06 |           |
| ENSGALG00000024298 | 32,030697 | 1,646495761 | 0,3488596 | 4,7196511 | 2,36E-06 | 2,81E-05 | ADAMTSL5  |
| ENSGALG00000004394 | 167,65918 | 1,640660466 | 0,2837407 | 5,7822521 | 7,37E-09 | 1,49E-07 | PCBP3     |
| ENSGALG00000016262 | 396,40337 | 1,640510999 | 0,2287869 | 7,1704758 | 7,47E-13 | 2,77E-11 | XK        |
| ENSGALG00000015905 | 84,004407 | 1,632452898 | 0,3358609 | 4,860503  | 1,17E-06 | 1,51E-05 | SLC7A7    |
| ENSGALG00000005293 | 115,92754 | 1,631397185 | 0,3272119 | 4,9857512 | 6,17E-07 | 8,36E-06 | GNG13     |
| ENSGALG00000025946 | 137,58478 | 1,630278266 | 0,3118772 | 5,2273088 | 1,72E-07 | 2,64E-06 | MOB3C     |
| ENSGALG00000011806 | 33,35332  | 1,625032877 | 0,3475057 | 4,6762767 | 2,92E-06 | 3,39E-05 | MUC13     |
| ENSGALG00000010721 | 516,48932 | 1,61713725  | 0,1982525 | 8,1569561 | 3,44E-16 | 1,92E-14 | GLIS1     |
| ENSGALG00000008133 | 122,89128 | 1,61551597  | 0,3252043 | 4,9676957 | 6,78E-07 | 9,10E-06 | AS3MT     |
| ENSGALG00000000820 | 127,58617 | 1,614544959 | 0,3185699 | 5,068102  | 4,02E-07 | 5,68E-06 | HTR1D     |
| ENSGALG00000002832 | 501,68162 | 1,610990532 | 0,2127694 | 7,5715338 | 3,69E-14 | 1,62E-12 | IFI35     |
| ENSGALG00000006606 | 3620,8517 | 1,610976489 | 0,1224776 | 13,153237 | 1,63E-39 | 5,29E-37 | KIAA1324L |
| ENSGALG00000011200 | 907,82877 | 1,609360966 | 0,246667  | 6,5244282 | 6,83E-11 | 1,91E-09 | THBS2     |
| ENSGALG00000007980 | 258,34488 | 1,607363167 | 0,2746243 | 5,8529528 | 4,83E-09 | 1,02E-07 | KCNG1     |
| ENSGALG00000001062 | 680,57905 | 1,606326071 | 0,191836  | 8,3734359 | 5,60E-17 | 3,43E-15 | GGT7      |
| ENSGALG00000003106 | 661,98127 | 1,604428011 | 0,2222828 | 7,217957  | 5,28E-13 | 2,01E-11 | TOX2      |
| ENSGALG00000007815 | 333,86581 | 1,603027021 | 0,2797129 | 5,7309725 | 9,99E-09 | 1,96E-07 | ANKK1     |
| ENSGALG00000015366 | 80,07277  | 1,602600172 | 0,3432645 | 4,6687031 | 3,03E-06 | 3,52E-05 |           |
| ENSGALG00000005725 | 91,108572 | 1,601523904 | 0,352027  | 4,5494347 | 5,38E-06 | 5,90E-05 | CSF1R     |
| ENSGALG00000022644 | 26,874228 | 1,595235245 | 0,3437941 | 4,6400892 | 3,48E-06 | 3,98E-05 | CCDC36    |

|                    |           |             |           |           |          |           |                |
|--------------------|-----------|-------------|-----------|-----------|----------|-----------|----------------|
| ENSGALG00000007759 | 856,86635 | 1,594985498 | 0,1989057 | 8,0188035 | 1,07E-15 | 5,57E-14  | TMEFF2         |
| ENSGALG00000008830 | 781,04938 | 1,591806155 | 0,2114024 | 7,5297432 | 5,08E-14 | 2,17E-12  | BMP2           |
| ENSGALG00000006412 | 53,058714 | 1,591456503 | 0,3527925 | 4,5110267 | 6,45E-06 | 6,90E-05  | VGLL1          |
| ENSGALG00000029174 | 5348,1501 | 1,589321167 | 0,1290901 | 12,311717 | 7,83E-35 | 1,87E-32  |                |
| ENSGALG00000006245 | 402,97003 | 1,589094556 | 0,227751  | 6,9773328 | 3,01E-12 | 1,04E-10  | KLF15          |
| ENSGALG00000026733 | 77,5006   | 1,588089103 | 0,3406644 | 4,6617403 | 3,14E-06 | 3,62E-05  | FFAR4          |
| ENSGALG00000016138 | 93,251278 | 1,581494384 | 0,3296626 | 4,7973118 | 1,61E-06 | 2,00E-05  | DSCAM          |
| ENSGALG00000016498 | 94,791705 | 1,580375213 | 0,3294934 | 4,7963786 | 1,62E-06 | 2,01E-05  | MFSD2B         |
| ENSGALG00000011343 | 80,565753 | 1,579403764 | 0,3348001 | 4,7174527 | 2,39E-06 | 2,83E-05  | SLC23A3        |
| ENSGALG00000000733 | 1063,131  | 1,578595816 | 0,1987694 | 7,941845  | 1,99E-15 | 1,00E-13  | MYO7A          |
| ENSGALG00000028175 | 72,934835 | 1,575180638 | 0,35396   | 4,4501653 | 8,58E-06 | 9,01E-05  | GJA9           |
| ENSGALG00000015293 | 333,00466 | 1,574970296 | 0,2444462 | 6,4430147 | 1,17E-10 | 3,15E-09  | TMEM45A        |
| ENSGALG00000012115 | 228,29439 | 1,572479232 | 0,2734467 | 5,7505884 | 8,89E-09 | 1,77E-07  |                |
| ENSGALG00000004692 | 57,025385 | 1,559793633 | 0,3537015 | 4,4099148 | 1,03E-05 | 0,0001064 | FDX1L          |
| ENSGALG00000005958 | 558,63577 | 1,558583818 | 0,2329918 | 6,6894354 | 2,24E-11 | 6,70E-10  | TRIM66         |
| ENSGALG00000000826 | 97,953466 | 1,551558986 | 0,3236865 | 4,7933999 | 1,64E-06 | 2,03E-05  | MAPK13         |
| ENSGALG00000007690 | 2070,9973 | 1,54950396  | 0,1755538 | 8,8263752 | 1,08E-18 | 7,67E-17  | TFAP2C         |
| ENSGALG00000006964 | 225,19101 | 1,546629935 | 0,2930271 | 5,2781128 | 1,31E-07 | 2,05E-06  | SDR42E2        |
| ENSGALG00000005967 | 735,63667 | 1,545091384 | 0,2216792 | 6,9699438 | 3,17E-12 | 1,09E-10  | LMO1           |
| ENSGALG00000008440 | 429,09527 | 1,543692993 | 0,21647   | 7,1312088 | 9,95E-13 | 3,64E-11  | CHST1          |
| ENSGALG00000001882 | 38,709827 | 1,540579881 | 0,352114  | 4,3752309 | 1,21E-05 | 0,0001224 | TNFRSF18       |
| ENSGALG00000015373 | 27,601769 | 1,538791481 | 0,3445115 | 4,4665892 | 7,95E-06 | 8,37E-05  | PDE6B          |
| ENSGALG00000011577 | 399,56293 | 1,531134988 | 0,217286  | 7,0466337 | 1,83E-12 | 6,48E-11  | CNTNAP5        |
| ENSGALG00000025774 | 5724,9696 | 1,527733684 | 0,1270402 | 12,025592 | 2,61E-33 | 5,82E-31  | HOXB2          |
| ENSGALG00000005473 | 107,68664 | 1,527501434 | 0,3207303 | 4,7625734 | 1,91E-06 | 2,31E-05  |                |
| ENSGALG00000000479 | 244,69562 | 1,527264642 | 0,2552088 | 5,984374  | 2,17E-09 | 4,90E-08  | PADI3          |
| ENSGALG00000011071 | 944,33324 | 1,527069671 | 0,169472  | 9,0107512 | 2,05E-19 | 1,57E-17  | CLMN           |
| ENSGALG00000020459 | 25,515422 | 1,526419374 | 0,3416733 | 4,4674817 | 7,91E-06 | 8,34E-05  |                |
| ENSGALG00000014267 | 99,335217 | 1,525149591 | 0,3197285 | 4,7701403 | 1,84E-06 | 2,24E-05  | RBM47          |
| ENSGALG00000007803 | 165,80729 | 1,522432144 | 0,2956669 | 5,1491467 | 2,62E-07 | 3,86E-06  |                |
| ENSGALG00000001569 | 88,715373 | 1,518412601 | 0,3422278 | 4,4368471 | 9,13E-06 | 9,51E-05  | RHOC           |
| ENSGALG00000020745 | 195,27404 | 1,515524715 | 0,2743093 | 5,5248748 | 3,30E-08 | 5,85E-07  | RHO            |
| ENSGALG00000011227 | 778,97981 | 1,515331444 | 0,1818025 | 8,3350423 | 7,75E-17 | 4,65E-15  | CDS1           |
| ENSGALG00000007594 | 126,92297 | 1,512071087 | 0,3020168 | 5,0065791 | 5,54E-07 | 7,63E-06  | ASB12          |
| ENSGALG00000002314 | 85,131488 | 1,511687395 | 0,3333097 | 4,5353841 | 5,75E-06 | 6,23E-05  | CDHR1          |
| ENSGALG00000002353 | 221,89831 | 1,511078773 | 0,2623724 | 5,7592906 | 8,45E-09 | 1,69E-07  | C1orf216       |
| ENSGALG00000024397 | 46,37702  | 1,510326295 | 0,3539532 | 4,2670226 | 1,98E-05 | 0,000186  |                |
| ENSGALG00000023866 | 254,33653 | 1,510055693 | 0,2802587 | 5,3880776 | 7,12E-08 | 1,18E-06  | ALPI           |
| ENSGALG00000026089 | 41,811297 | 1,509966763 | 0,3504419 | 4,3087509 | 1,64E-05 | 0,0001581 | SLC26A6        |
| ENSGALG00000028386 | 982,7252  | 1,507238343 | 0,1699771 | 8,8673018 | 7,49E-19 | 5,49E-17  | SPEG           |
| ENSGALG00000006479 | 34,346853 | 1,50588664  | 0,3481979 | 4,3248009 | 1,53E-05 | 0,0001484 | CCM2L          |
| ENSGALG00000005297 | 304,6597  | 1,505251197 | 0,2455725 | 6,1295583 | 8,81E-10 | 2,10E-08  | HHATL          |
| ENSGALG00000004448 | 547,11485 | 1,504790559 | 0,2323026 | 6,4777179 | 9,31E-11 | 2,55E-09  | BRINP2         |
| ENSGALG00000026983 | 590,10355 | 1,50209184  | 0,2137064 | 7,0287654 | 2,08E-12 | 7,31E-11  | CHRD           |
| ENSGALG00000024264 | 40,681213 | 1,501303133 | 0,349559  | 4,2948485 | 1,75E-05 | 0,0001668 | CTD-2207O23.12 |
| ENSGALG00000028347 | 76,972548 | 1,501152953 | 0,3426288 | 4,381281  | 1,18E-05 | 0,0001192 | SDCBP2         |
| ENSGALG00000016556 | 93,532731 | 1,500831481 | 0,3253057 | 4,6136038 | 3,96E-06 | 4,47E-05  | GVIN1          |
| ENSGALG00000008424 | 31,555997 | 1,500581439 | 0,3495073 | 4,2934189 | 1,76E-05 | 0,0001675 | CALML3         |
| ENSGALG00000016287 | 253,69324 | 1,497802744 | 0,250661  | 5,9754121 | 2,30E-09 | 5,17E-08  | NR0B1          |
| ENSGALG00000028069 | 276,23402 | 1,497716991 | 0,2556436 | 5,858613  | 4,67E-09 | 9,87E-08  | WNT16          |
| ENSGALG00000015410 | 210,47767 | 1,497100835 | 0,2682786 | 5,5803964 | 2,40E-08 | 4,38E-07  | BVES           |
| ENSGALG00000014074 | 676,43326 | 1,49566297  | 0,191936  | 7,7925091 | 6,57E-15 | 3,08E-13  | CPEB4          |
| ENSGALG00000003713 | 62,007135 | 1,494159857 | 0,3495106 | 4,2750063 | 1,91E-05 | 0,0001803 | CLCNKB         |
| ENSGALG00000007409 | 87,08015  | 1,493981037 | 0,3289914 | 4,5410949 | 5,60E-06 | 6,09E-05  | SCN4B          |
| ENSGALG00000028823 | 172,11814 | 1,491796906 | 0,2989787 | 4,9896427 | 6,05E-07 | 8,21E-06  | C9orf172       |
| ENSGALG00000026585 | 53,571101 | 1,487448109 | 0,3507492 | 4,240774  | 2,23E-05 | 0,0002057 | FAM19A3        |
| ENSGALG00000027548 | 35,763933 | 1,48608799  | 0,3490327 | 4,2577329 | 2,07E-05 | 0,0001927 | PROK1          |
| ENSGALG00000028770 | 169,21444 | 1,483894729 | 0,3097948 | 4,7899285 | 1,67E-06 | 2,06E-05  | INHBB          |
| ENSGALG00000015237 | 27,293769 | 1,481694783 | 0,3444717 | 4,3013545 | 1,70E-05 | 0,0001626 | PPIL6          |
| ENSGALG00000015084 | 1284,7693 | 1,480304896 | 0,1853415 | 7,9869029 | 1,38E-15 | 7,11E-14  | IGSF11         |
| ENSGALG00000027357 | 83,363535 | 1,478068348 | 0,3342619 | 4,4218869 | 9,78E-06 | 0,000101  | PTGES          |
| ENSGALG00000007908 | 523,87573 | 1,477721596 | 0,2119438 | 6,9722343 | 3,12E-12 | 1,08E-10  | EFEMP1         |

|                    |           |             |           |           |          |           |          |
|--------------------|-----------|-------------|-----------|-----------|----------|-----------|----------|
| ENSGALG00000008888 | 216,09563 | 1,475198435 | 0,2663438 | 5,5386996 | 3,05E-08 | 5,45E-07  | IL1RAPL2 |
| ENSGALG00000000984 | 31,631294 | 1,47391651  | 0,3504148 | 4,2062051 | 2,60E-05 | 0,0002346 | AGPAT1L  |
| ENSGALG00000007862 | 431,76183 | 1,47265082  | 0,2334046 | 6,3094329 | 2,80E-10 | 7,11E-09  | CNTN3    |
| ENSGALG00000016538 | 1671,2767 | 1,472170836 | 0,1444523 | 10,191396 | 2,17E-24 | 2,59E-22  | RAI2     |
| ENSGALG00000002442 | 183,2009  | 1,464263461 | 0,2851722 | 5,1346638 | 2,83E-07 | 4,12E-06  | ANKS4B   |
| ENSGALG00000010107 | 1860,6289 | 1,462273804 | 0,1417872 | 10,313158 | 6,14E-25 | 7,75E-23  | FHDC1    |
| ENSGALG00000026677 | 510,78911 | 1,461550873 | 0,2721661 | 5,3700699 | 7,87E-08 | 1,29E-06  | F10      |
| ENSGALG00000000703 | 748,40789 | 1,459568013 | 0,2288692 | 6,3773027 | 1,80E-10 | 4,77E-09  | SLC45A3  |
| ENSGALG00000026069 | 33,975719 | 1,459502097 | 0,3469009 | 4,207259  | 2,58E-05 | 0,0002339 |          |
| ENSGALG00000001319 | 188,5387  | 1,458388464 | 0,2745911 | 5,3111274 | 1,09E-07 | 1,73E-06  | CAMK1G   |
| ENSGALG00000014297 | 511,06078 | 1,457150717 | 0,2085114 | 6,9883507 | 2,78E-12 | 9,64E-11  | IRF7     |
| ENSGALG00000004565 | 123,01022 | 1,456247274 | 0,3389164 | 4,2967747 | 1,73E-05 | 0,0001657 | PHYHD1   |
| ENSGALG00000010024 | 105,10355 | 1,453185654 | 0,3195715 | 4,5472947 | 5,43E-06 | 5,94E-05  |          |
| ENSGALG00000014941 | 729,89146 | 1,451697765 | 0,1864124 | 7,7875602 | 6,83E-15 | 3,20E-13  | STXBP5L  |
| ENSGALG00000018878 | 40,669529 | 1,44967545  | 0,3538085 | 4,0973448 | 4,18E-05 | 0,000353  |          |
| ENSGALG00000015128 | 44,346554 | 1,44940013  | 0,3539598 | 4,0948156 | 4,23E-05 | 0,0003559 | AQP4     |
| ENSGALG00000006751 | 459,34864 | 1,449311054 | 0,2141744 | 6,7669659 | 1,32E-11 | 4,09E-10  | THY1     |
| ENSGALG00000017041 | 876,05201 | 1,44806939  | 0,2013684 | 7,1911442 | 6,43E-13 | 2,41E-11  | FREM2    |
| ENSGALG00000007211 | 323,24032 | 1,44654086  | 0,2459257 | 5,8820245 | 4,05E-09 | 8,74E-08  | CDH22    |
| ENSGALG00000001727 | 728,89366 | 1,445847057 | 0,1802658 | 8,0206403 | 1,05E-15 | 5,52E-14  | LZTS1    |
| ENSGALG00000006239 | 29,398702 | 1,443346989 | 0,3491735 | 4,1336095 | 3,57E-05 | 0,0003093 |          |
| ENSGALG00000023395 | 151,59782 | 1,441830671 | 0,2999274 | 4,807265  | 1,53E-06 | 1,91E-05  | PLIN1    |
| ENSGALG00000013640 | 91,822966 | 1,440450208 | 0,3243745 | 4,4407017 | 8,97E-06 | 9,38E-05  | MBP      |
| ENSGALG00000014962 | 26,464506 | 1,440003001 | 0,3431954 | 4,1958697 | 2,72E-05 | 0,0002436 | FAM26F   |
| ENSGALG00000008267 | 52,964686 | 1,439464257 | 0,3533811 | 4,0734046 | 4,63E-05 | 0,0003844 | IL5RA    |
| ENSGALG00000011202 | 37,140825 | 1,438867662 | 0,3522352 | 4,0849627 | 4,41E-05 | 0,0003675 | COLQ     |
| ENSGALG00000012652 | 778,18023 | 1,438231617 | 0,2169215 | 6,6301938 | 3,35E-11 | 9,79E-10  | KCNG2    |
| ENSGALG00000001710 | 36,697213 | 1,437606263 | 0,3472289 | 4,1402264 | 3,47E-05 | 0,0003013 |          |
| ENSGALG00000014695 | 237,14245 | 1,436054042 | 0,2846492 | 5,0449961 | 4,54E-07 | 6,35E-06  | CLCN1    |
| ENSGALG00000024368 | 80,858185 | 1,435967902 | 0,3383077 | 4,2445619 | 2,19E-05 | 0,0002029 | AMH      |
| ENSGALG00000003678 | 3218,3918 | 1,429238494 | 0,1247553 | 11,456331 | 2,19E-30 | 3,97E-28  | GLUL     |
| ENSGALG00000012313 | 84,383689 | 1,428353126 | 0,34636   | 4,1238977 | 3,73E-05 | 0,0003194 | H1FO     |
| ENSGALG00000000914 | 24,818166 | 1,42659313  | 0,3378824 | 4,2221587 | 2,42E-05 | 0,0002211 |          |
| ENSGALG00000006565 | 175,49957 | 1,424795357 | 0,3261375 | 4,3686951 | 1,25E-05 | 0,0001254 | GGT1     |
| ENSGALG00000011888 | 40,65783  | 1,420709802 | 0,353895  | 4,0144953 | 5,96E-05 | 0,0004785 | TGM4     |
| ENSGALG00000010213 | 97,780516 | 1,420151903 | 0,3251042 | 4,3682976 | 1,25E-05 | 0,0001255 | VSX2     |
| ENSGALG00000008901 | 121,60703 | 1,417468594 | 0,3085387 | 4,594136  | 4,35E-06 | 4,87E-05  | PTGFR    |
| ENSGALG00000009596 | 108,17405 | 1,416089625 | 0,3214369 | 4,4054986 | 1,06E-05 | 0,0001081 | TMEM117  |
| ENSGALG00000014412 | 49,062969 | 1,415817045 | 0,3518535 | 4,0238822 | 5,72E-05 | 0,0004628 | CSTA     |
| ENSGALG00000000589 | 81,385408 | 1,415474788 | 0,3386211 | 4,1801144 | 2,91E-05 | 0,0002588 | BTN1A1   |
| ENSGALG00000023834 | 58,026469 | 1,413727582 | 0,350805  | 4,0299523 | 5,58E-05 | 0,0004527 |          |
| ENSGALG00000018998 | 220,94684 | 1,412120959 | 0,2810636 | 5,0242041 | 5,06E-07 | 7,03E-06  | UNC5A    |
| ENSGALG00000013081 | 81,619637 | 1,411618895 | 0,3443628 | 4,0992204 | 4,15E-05 | 0,0003508 | VWC2     |
| ENSGALG00000027520 | 176,34242 | 1,409426755 | 0,294554  | 4,7849521 | 1,71E-06 | 2,10E-05  |          |
| ENSGALG00000020423 | 91,673069 | 1,409349068 | 0,344453  | 4,0915566 | 4,28E-05 | 0,0003598 | NKX2-1   |
| ENSGALG00000026957 | 482,71907 | 1,407844107 | 0,20929   | 6,726761  | 1,73E-11 | 5,28E-10  | SEMA4G   |
| ENSGALG00000010486 | 221,46033 | 1,406315246 | 0,2602657 | 5,4033833 | 6,54E-08 | 1,10E-06  | JAKMIP3  |
| ENSGALG00000028936 | 318,09117 | 1,405167114 | 0,2341016 | 6,0023824 | 1,94E-09 | 4,43E-08  |          |
| ENSGALG00000002637 | 48,952453 | 1,404353552 | 0,3533799 | 3,9740621 | 7,07E-05 | 0,0005557 | RBP7     |
| ENSGALG00000026948 | 265,89811 | 1,40406892  | 0,2839426 | 4,9449037 | 7,62E-07 | 1,01E-05  | ADD2     |
| ENSGALG00000016782 | 106,88039 | 1,400781577 | 0,3284889 | 4,2643192 | 2,01E-05 | 0,000188  | IL1R2    |
| ENSGALG00000015918 | 313,69588 | 1,399804901 | 0,2380455 | 5,8804082 | 4,09E-09 | 8,82E-08  | NECAB1   |
| ENSGALG00000011594 | 42,210813 | 1,39976735  | 0,3539056 | 3,9552003 | 7,65E-05 | 0,0005929 | NR1H4    |
| ENSGALG00000009390 | 538,73431 | 1,398258988 | 0,2055508 | 6,8024979 | 1,03E-11 | 3,26E-10  | MET      |
| ENSGALG00000004252 | 60,119703 | 1,3977567   | 0,3472961 | 4,0246834 | 5,71E-05 | 0,0004615 |          |
| ENSGALG00000019864 | 58,892366 | 1,392548079 | 0,3487729 | 3,9927067 | 6,53E-05 | 0,0005177 |          |
| ENSGALG00000029083 | 179,60714 | 1,390642479 | 0,2814687 | 4,9406649 | 7,79E-07 | 1,03E-05  | NXPH2    |
| ENSGALG00000012875 | 68,467203 | 1,389711553 | 0,3440597 | 4,0391582 | 5,36E-05 | 0,0004376 | WEE2     |
| ENSGALG00000023689 | 74,977508 | 1,388126911 | 0,3405714 | 4,0758757 | 4,58E-05 | 0,0003808 | ASS1     |
| ENSGALG00000026536 | 52,51215  | 1,387507758 | 0,3536902 | 3,9229466 | 8,75E-05 | 0,0006706 | IP6K3    |
| ENSGALG00000014857 | 696,58457 | 1,387229623 | 0,1828391 | 7,587161  | 3,27E-14 | 1,45E-12  | SEPP1    |
| ENSGALG00000002319 | 151,6038  | 1,386034084 | 0,2938554 | 4,7167213 | 2,40E-06 | 2,84E-05  | TEKT2    |



|                    |           |             |           |           |           |           |            |
|--------------------|-----------|-------------|-----------|-----------|-----------|-----------|------------|
| ENSGALG00000015776 | 28,48922  | 1,382386109 | 0,3437254 | 4,0217745 | 5,78E-05  | 0,0004664 | GABRR2     |
| ENSGALG00000007636 | 33,478978 | 1,381489214 | 0,3508105 | 3,9379927 | 8,22E-05  | 0,0006327 | PCK1       |
| ENSGALG00000007014 | 150,69691 | 1,378668928 | 0,2898641 | 4,7562591 | 1,97E-06  | 2,38E-05  | PYROXD2    |
| ENSGALG00000027973 | 59,731595 | 1,378158223 | 0,3525539 | 3,909071  | 9,27E-05  | 0,0007038 | CATH1      |
| ENSGALG00000017099 | 99,501102 | 1,377440865 | 0,3228202 | 4,266898  | 1,98E-05  | 0,000186  | RASL11A    |
| ENSGALG00000005493 | 91,862545 | 1,375327372 | 0,3276333 | 4,1977643 | 2,70E-05  | 0,0002424 | ITGB1BP2   |
| ENSGALG00000006522 | 45,353339 | 1,373172    | 0,3533367 | 3,8862984 | 0,0001018 | 0,0007623 | HCK        |
| ENSGALG00000012956 | 1426,5049 | 1,372804533 | 0,1863192 | 7,3680244 | 1,73E-13  | 6,93E-12  | TMTC1      |
| ENSGALG00000002105 | 44,541184 | 1,371897103 | 0,3536727 | 3,8790025 | 0,0001049 | 0,0007838 | FOXI1      |
| ENSGALG00000016584 | 157,58752 | 1,371284929 | 0,2995639 | 4,5776048 | 4,70E-06  | 5,25E-05  | EGFL6      |
| ENSGALG00000000730 | 181,14132 | 1,369179792 | 0,2801686 | 4,8869848 | 1,02E-06  | 1,33E-05  | CACNA1S    |
| ENSGALG00000009151 | 104,26311 | 1,368816021 | 0,3214356 | 4,2584453 | 2,06E-05  | 0,0001922 | FCN2       |
| ENSGALG00000027420 | 141,8792  | 1,367365407 | 0,2942071 | 4,6476294 | 3,36E-06  | 3,86E-05  | POPDC3     |
| ENSGALG00000012971 | 180,16128 | 1,365874431 | 0,2750242 | 4,9663794 | 6,82E-07  | 9,15E-06  | CCDC170    |
| ENSGALG00000005852 | 42,716737 | 1,364112477 | 0,3537079 | 3,8566077 | 0,000115  | 0,0008438 | SRMS       |
| ENSGALG00000020458 | 27,129951 | 1,361629377 | 0,3397843 | 4,0073347 | 6,14E-05  | 0,0004906 | PLA2G4E    |
| ENSGALG00000013221 | 46,584811 | 1,36089575  | 0,3526259 | 3,8593185 | 0,0001137 | 0,0008363 | ARHGEF33   |
| ENSGALG00000016155 | 67,519598 | 1,359832396 | 0,3425225 | 3,9700528 | 7,19E-05  | 0,0005636 | COL19A1    |
| ENSGALG00000004840 | 833,06506 | 1,358453061 | 0,1689566 | 8,0402477 | 8,97E-16  | 4,78E-14  | RPH3A      |
| ENSGALG00000014913 | 89,586553 | 1,358196979 | 0,3332154 | 4,0760324 | 4,58E-05  | 0,0003808 | ROS1       |
| ENSGALG00000028822 | 179,37935 | 1,357789969 | 0,2792664 | 4,861989  | 1,16E-06  | 1,50E-05  | RNF152     |
| ENSGALG00000001932 | 150,41219 | 1,357009459 | 0,310456  | 4,3710208 | 1,24E-05  | 0,0001245 | SRRM3      |
| ENSGALG00000006104 | 74,225594 | 1,356707559 | 0,3368845 | 4,027219  | 5,64E-05  | 0,0004571 | ADAMTSL3   |
| ENSGALG00000013914 | 741,46351 | 1,355434386 | 0,2231994 | 6,0727508 | 1,26E-09  | 2,95E-08  | SERINC4    |
| ENSGALG00000001863 | 95,573016 | 1,354146203 | 0,3495798 | 3,8736396 | 0,0001072 | 0,0007966 | VTG2       |
| ENSGALG00000024064 | 33,370003 | 1,353791502 | 0,3529207 | 3,835965  | 0,0001251 | 0,0009082 | BMP8B      |
| ENSGALG00000017036 | 3151,4224 | 1,353726483 | 0,1434983 | 9,4337437 | 3,96E-21  | 3,41E-19  | LHFP       |
| ENSGALG00000016342 | 64,688956 | 1,353678127 | 0,3480736 | 3,8890574 | 0,0001006 | 0,0007541 | MYOM2      |
| ENSGALG00000028162 | 25,784822 | 1,353451729 | 0,3407708 | 3,9717367 | 7,14E-05  | 0,0005606 |            |
| ENSGALG00000025857 | 83,462878 | 1,352908608 | 0,3353198 | 4,0346816 | 5,47E-05  | 0,0004451 |            |
| ENSGALG00000005898 | 30,859755 | 1,351366295 | 0,3483263 | 3,8795984 | 0,0001046 | 0,0007823 | DND1       |
| ENSGALG00000026817 | 190,25856 | 1,350039834 | 0,3072699 | 4,3936618 | 1,11E-05  | 0,0001138 |            |
| ENSGALG00000011259 | 318,18554 | 1,346953088 | 0,237873  | 5,6624895 | 1,49E-08  | 2,86E-07  | RPE65      |
| ENSGALG00000015186 | 1129,1529 | 1,345677898 | 0,1669938 | 8,0582487 | 7,74E-16  | 4,20E-14  | KLHL14     |
| ENSGALG00000027568 | 132,01086 | 1,344832291 | 0,3108069 | 4,3269066 | 1,51E-05  | 0,0001475 |            |
| ENSGALG00000003671 | 47,547146 | 1,341551712 | 0,3538875 | 3,7908993 | 0,0001501 | 0,0010672 |            |
| ENSGALG00000007106 | 977,16123 | 1,340640592 | 0,2071983 | 6,4703268 | 9,78E-11  | 2,66E-09  | DNAH17     |
| ENSGALG00000002466 | 67,363583 | 1,337320513 | 0,3459423 | 3,8657324 | 0,0001108 | 0,0008178 | SLC2A5     |
| ENSGALG00000008283 | 62,956159 | 1,336619904 | 0,3480958 | 3,8398045 | 0,0001231 | 0,0008951 | CYP2J2L6   |
| ENSGALG00000009058 | 854,57904 | 1,336327117 | 0,176152  | 7,5862168 | 3,29E-14  | 1,46E-12  | ENTPD2     |
| ENSGALG00000014523 | 712,2168  | 1,335395904 | 0,1808886 | 7,3824225 | 1,55E-13  | 6,30E-12  | MATN2      |
| ENSGALG00000027624 | 90,7092   | 1,332865286 | 0,324427  | 4,1083672 | 3,98E-05  | 0,0003397 |            |
| ENSGALG00000020380 | 160,77545 | 1,332253662 | 0,2975792 | 4,476972  | 7,57E-06  | 8,01E-05  |            |
| ENSGALG00000014117 | 36,1409   | 1,330198207 | 0,3537602 | 3,7601691 | 0,0001698 | 0,0011923 | AVP        |
| ENSGALG00000005330 | 2519,7711 | 1,328511787 | 0,1342416 | 9,8964213 | 4,31E-23  | 4,45E-21  | SNCAIP     |
| ENSGALG00000013481 | 89,334053 | 1,327640637 | 0,3315342 | 4,0045364 | 6,21E-05  | 0,0004953 | IKZF3      |
| ENSGALG00000008434 | 453,34748 | 1,327566577 | 0,2234773 | 5,9404989 | 2,84E-09  | 6,30E-08  | SORCS3     |
| ENSGALG00000006134 | 56,091168 | 1,326807835 | 0,348696  | 3,8050556 | 0,0001418 | 0,0010148 | HOGA1      |
| ENSGALG00000004903 | 45,997304 | 1,326402261 | 0,3537178 | 3,7498888 | 0,0001769 | 0,0012333 | CHST8      |
| ENSGALG00000015309 | 102,61836 | 1,321942011 | 0,3301857 | 4,0036322 | 6,24E-05  | 0,0004969 | SCML4      |
| ENSGALG00000016551 | 5221,0551 | 1,321564075 | 0,1177455 | 11,223902 | 3,11E-29  | 5,11E-27  | AC025048.1 |
| ENSGALG00000013302 | 789,25879 | 1,321288665 | 0,1757375 | 7,5185339 | 5,54E-14  | 2,35E-12  | SYT7       |
| ENSGALG00000009315 | 90,474554 | 1,318764229 | 0,3335429 | 3,9538073 | 7,69E-05  | 0,000596  | PAPLN      |
| ENSGALG00000027575 | 153,60071 | 1,316495304 | 0,2966273 | 4,4382135 | 9,07E-06  | 9,46E-05  | RAMP3      |
| ENSGALG00000003050 | 83,782773 | 1,314582894 | 0,3351464 | 3,9224135 | 8,77E-05  | 0,0006717 | ADRA2B     |
| ENSGALG00000002792 | 26,932942 | 1,31306542  | 0,34508   | 3,8051042 | 0,0001417 | 0,0010148 | SPDEF      |
| ENSGALG00000016368 | 37,747118 | 1,308737431 | 0,3539388 | 3,6976373 | 0,0002176 | 0,0014711 | KLHL38     |
| ENSGALG00000002389 | 532,14602 | 1,308458099 | 0,1976049 | 6,6215867 | 3,55E-11  | 1,03E-09  | ITGB4      |
| ENSGALG00000000164 | 213,8267  | 1,307977843 | 0,2786458 | 4,6940518 | 2,68E-06  | 3,15E-05  | MYBPH      |
| ENSGALG00000007732 | 613,17499 | 1,306274335 | 0,1852621 | 7,0509534 | 1,78E-12  | 6,32E-11  | RTN4R      |
| ENSGALG00000013838 | 384,54265 | 1,305966304 | 0,2158246 | 6,0510536 | 1,44E-09  | 3,34E-08  |            |
| ENSGALG00000003316 | 80,926571 | 1,303670454 | 0,3335441 | 3,9085405 | 9,29E-05  | 0,0007043 | FMO3       |

|                     |           |             |           |           |           |           |            |
|---------------------|-----------|-------------|-----------|-----------|-----------|-----------|------------|
| ENSGALG00000005802  | 409,59537 | 1,302158184 | 0,2262217 | 5,7561153 | 8,61E-09  | 1,72E-07  | FLT4       |
| ENSGALG00000016109  | 151,6721  | 1,299400996 | 0,288909  | 4,4976137 | 6,87E-06  | 7,31E-05  | KCNV1      |
| ENSGALG00000009700  | 477,10962 | 1,299326338 | 0,2326682 | 5,5844594 | 2,34E-08  | 4,28E-07  | PDK4       |
| ENSGALG00000006045  | 136,04518 | 1,297721233 | 0,3015022 | 4,3041847 | 1,68E-05  | 0,0001609 | SH3GL3     |
| ENSGALG00000006165  | 67,169846 | 1,296804529 | 0,3443385 | 3,7660745 | 0,0001658 | 0,0011656 | WDFY4      |
| ENSGALG00000002234  | 407,0013  | 1,296274176 | 0,217295  | 5,9655032 | 2,44E-09  | 5,48E-08  | UNC13D     |
| ENSGALG00000002051  | 21,039089 | 1,294841211 | 0,3323973 | 3,895462  | 9,80E-05  | 0,0007377 | DNASE1     |
| ENSGALG00000008022  | 294,02931 | 1,293915137 | 0,239607  | 5,4001556 | 6,66E-08  | 1,11E-06  | TAPBP      |
| ENSGALG00000000775  | 136,7775  | 1,291374316 | 0,3199881 | 4,0356942 | 5,44E-05  | 0,0004436 | CTSS       |
| ENSGALG00000010540  | 264,70457 | 1,289706596 | 0,2432527 | 5,3019215 | 1,15E-07  | 1,81E-06  | TTC39A     |
| ENSGALG00000005790  | 146,07742 | 1,289660896 | 0,3149604 | 4,0946765 | 4,23E-05  | 0,0003559 | DEPTOR     |
| ENSGALG00000004859  | 354,90162 | 1,288425333 | 0,2477818 | 5,1998389 | 1,99E-07  | 3,02E-06  | ZNFX1      |
| ENSGALG00000003118  | 754,37839 | 1,286216079 | 0,1877588 | 6,8503656 | 7,37E-12  | 2,38E-10  | GPR124     |
| ENSGALG00000006779  | 194,18454 | 1,285794374 | 0,2904687 | 4,4266201 | 9,57E-06  | 9,92E-05  | PDZD3      |
| ENSGALG00000012362  | 940,67168 | 1,285048698 | 0,1725255 | 7,4484556 | 9,44E-14  | 3,88E-12  | THSD7B     |
| ENSGALG00000004044  | 637,18108 | 1,285008651 | 0,1978538 | 6,4947372 | 8,32E-11  | 2,30E-09  | CSRP3      |
| ENSGALG00000003580  | 1991,2953 | 1,284312011 | 0,1942227 | 6,6125738 | 3,78E-11  | 1,09E-09  | MMP2       |
| ENSGALG00000002855  | 1183,6448 | 1,278753967 | 0,1621147 | 7,8879566 | 3,07E-15  | 1,50E-13  | SARDH      |
| ENSGALG00000016564  | 80,407544 | 1,275019755 | 0,3413328 | 3,7354158 | 0,0001874 | 0,0012926 | PTK2B      |
| ENSGALG00000001028  | 434,61935 | 1,272121671 | 0,2282446 | 5,5735011 | 2,50E-08  | 4,54E-07  | RNF43      |
| ENSGALG00000007078  | 141,27907 | 1,270778013 | 0,3066415 | 4,1441819 | 3,41E-05  | 0,0002963 | ENTPD1     |
| ENSGALG00000009689  | 798,33378 | 1,269454305 | 0,1789844 | 7,0925427 | 1,32E-12  | 4,74E-11  | PON2       |
| ENSGALG00000012740  | 435,21639 | 1,269186578 | 0,2159823 | 5,8763447 | 4,19E-09  | 8,99E-08  | ADAM12     |
| ENSGALG00000000909  | 237,54325 | 1,268775969 | 0,2625461 | 4,832584  | 1,35E-06  | 1,70E-05  | GFAP       |
| ENSGALG00000016967  | 712,9034  | 1,267335006 | 0,2153024 | 5,8863033 | 3,95E-09  | 8,55E-08  | ENOX1      |
| ENSGALG00000019797  | 403,10583 | 1,266041829 | 0,2858329 | 4,429307  | 9,45E-06  | 9,81E-05  |            |
| ENSGALG00000007562  | 30,687084 | 1,263491411 | 0,3496081 | 3,6140222 | 0,0003015 | 0,00195   | FGF4       |
| ENSGALG00000008953  | 507,74233 | 1,263384491 | 0,2035775 | 6,2059148 | 5,44E-10  | 1,33E-08  | AASS       |
| ENSGALG00000001795  | 978,86532 | 1,261084777 | 0,1873221 | 6,7321726 | 1,67E-11  | 5,13E-10  | GFRA2      |
| ENSGALG00000012978  | 566,09757 | 1,261073108 | 0,1899643 | 6,6384742 | 3,17E-11  | 9,30E-10  | CDYL2      |
| ENSGALG00000006725  | 183,57715 | 1,259943343 | 0,3248929 | 3,8780263 | 0,0001053 | 0,0007865 | ACAN       |
| ENSGALG00000014398  | 578,99454 | 1,259804122 | 0,2168754 | 5,8088844 | 6,29E-09  | 1,29E-07  | PPARGC1A   |
| ENSGALG00000015598  | 190,82086 | 1,259472248 | 0,277866  | 4,5326611 | 5,82E-06  | 6,30E-05  | RASGRF2    |
| ENSGALG00000002647  | 518,74694 | 1,258418808 | 0,2451254 | 5,1337755 | 2,84E-07  | 4,13E-06  | PLS1       |
| ENSGALG00000003490  | 147,80461 | 1,25835771  | 0,2972254 | 4,2336817 | 2,30E-05  | 0,0002112 | ALDH3B1    |
| ENSGALG00000005458  | 78,515702 | 1,258264066 | 0,3397845 | 3,7031237 | 0,000213  | 0,0014432 | RPL3L      |
| ENSGALG00000005843  | 363,33688 | 1,25767053  | 0,2724846 | 4,6155656 | 3,92E-06  | 4,43E-05  | EEF1A2     |
| ENSGALG00000006809  | 89,492709 | 1,25736391  | 0,3250463 | 3,8682605 | 0,0001096 | 0,0008106 | POU2AF1    |
| ENSGALG00000014014  | 690,53146 | 1,255177749 | 0,1779605 | 7,0531265 | 1,75E-12  | 6,24E-11  | LAMA2      |
| ENSGALG00000001348  | 34,354329 | 1,253857774 | 0,350669  | 3,5756163 | 0,0003494 | 0,0022157 | TEKT3      |
| ENSGALG000000021855 | 271,81428 | 1,251787198 | 0,252542  | 4,9567492 | 7,17E-07  | 9,57E-06  | CCDC39     |
| ENSGALG00000007193  | 236,11491 | 1,251769992 | 0,2743537 | 4,5626132 | 5,05E-06  | 5,59E-05  | HRASLS     |
| ENSGALG00000018557  | 36,565332 | 1,251460959 | 0,3537306 | 3,537893  | 0,0004033 | 0,0025029 | SOD3       |
| ENSGALG00000025896  | 117,28876 | 1,251281202 | 0,3211612 | 3,8961159 | 9,77E-05  | 0,0007361 | PLPPR4     |
| ENSGALG00000012547  | 219,75607 | 1,25117298  | 0,2908698 | 4,3014887 | 1,70E-05  | 0,0001626 | ACVR1C     |
| ENSGALG00000013356  | 85,223066 | 1,250931573 | 0,339616  | 3,6833703 | 0,0002302 | 0,001543  | IKBKE      |
| ENSGALG00000003404  | 2332,0677 | 1,24748878  | 0,1390419 | 8,972036  | 2,91E-19  | 2,21E-17  | TFEB       |
| ENSGALG00000001206  | 49,037007 | 1,247009104 | 0,3530765 | 3,5318378 | 0,0004127 | 0,0025563 |            |
| ENSGALG000000028496 | 22,12018  | 1,24376929  | 0,3359139 | 3,7026432 | 0,0002134 | 0,0014453 |            |
| ENSGALG00000007065  | 27,838516 | 1,239888336 | 0,3478406 | 3,5645304 | 0,0003645 | 0,0022955 | GJD4       |
| ENSGALG00000015345  | 537,38522 | 1,237723953 | 0,2000428 | 6,187296  | 6,12E-10  | 1,49E-08  |            |
| ENSGALG00000028448  | 68,098086 | 1,236909029 | 0,3465147 | 3,5695715 | 0,0003576 | 0,002257  | SH2D1B     |
| ENSGALG00000001564  | 906,15479 | 1,234344815 | 0,196986  | 6,2661565 | 3,70E-10  | 9,23E-09  | ATP2A3     |
| ENSGALG00000023036  | 562,73194 | 1,234170444 | 0,2058267 | 5,9961639 | 2,02E-09  | 4,57E-08  | FRMPD1     |
| ENSGALG00000010927  | 22,212585 | 1,233723332 | 0,3353328 | 3,6791008 | 0,0002341 | 0,0015644 | MEPE       |
| ENSGALG00000028681  | 168,61801 | 1,232657979 | 0,2905515 | 4,2424766 | 2,21E-05  | 0,0002043 |            |
| ENSGALG00000015573  | 43,775019 | 1,232214926 | 0,3535094 | 3,4856638 | 0,0004909 | 0,0029548 | FHL5       |
| ENSGALG00000005298  | 800,81856 | 1,231219861 | 0,1718969 | 7,1625504 | 7,92E-13  | 2,92E-11  | ST6GALNAC6 |
| ENSGALG00000016112  | 539,87209 | 1,228482119 | 0,2093942 | 5,8668384 | 4,44E-09  | 9,46E-08  | NOV        |
| ENSGALG00000000107  | 237,72923 | 1,227291307 | 0,277099  | 4,4290711 | 9,46E-06  | 9,81E-05  | TRIM7.1    |
| ENSGALG00000002086  | 83,650156 | 1,225708617 | 0,3336205 | 3,6739612 | 0,0002388 | 0,0015908 | RASL10B    |
| ENSGALG00000002667  | 699,19963 | 1,225466735 | 0,1768396 | 6,9298206 | 4,21E-12  | 1,40E-10  | OLFML2B    |



|                    |           |             |           |           |           |           |          |
|--------------------|-----------|-------------|-----------|-----------|-----------|-----------|----------|
| ENSGALG00000013431 | 35,449073 | 1,223926576 | 0,3535105 | 3,4622067 | 0,0005358 | 0,0031756 | RAX2     |
| ENSGALG00000028031 | 210,36093 | 1,22342747  | 0,2837755 | 4,3112512 | 1,62E-05  | 0,0001564 | C1QL1    |
| ENSGALG00000012019 | 150,4401  | 1,222353012 | 0,2981526 | 4,0997566 | 4,14E-05  | 0,0003505 | ARSJ     |
| ENSGALG00000000048 | 677,12707 | 1,221920851 | 0,1990761 | 6,1379597 | 8,36E-10  | 2,00E-08  |          |
| ENSGALG00000028946 | 391,05664 | 1,217039733 | 0,2510887 | 4,8470509 | 1,25E-06  | 1,59E-05  | CSRP2    |
| ENSGALG00000014407 | 118,55781 | 1,216198172 | 0,3199077 | 3,801716  | 0,0001437 | 0,0010259 | CASR     |
| ENSGALG00000012658 | 2563,9636 | 1,214376265 | 0,1523893 | 7,9689058 | 1,60E-15  | 8,19E-14  | TCP11L2  |
| ENSGALG00000028402 | 33,811586 | 1,211737057 | 0,3495685 | 3,466379  | 0,0005275 | 0,0031377 |          |
| ENSGALG00000003345 | 1065,5168 | 1,211546204 | 0,160937  | 7,5280764 | 5,15E-14  | 2,19E-12  | PLCD4    |
| ENSGALG00000005083 | 47,868272 | 1,210240985 | 0,3512641 | 3,4453881 | 0,0005702 | 0,0033455 | SLC5A10  |
| ENSGALG00000003803 | 110,85757 | 1,208011558 | 0,3397797 | 3,555279  | 0,0003776 | 0,0023603 | DAB2     |
| ENSGALG00000026578 | 55,333978 | 1,20748664  | 0,3538872 | 3,4120664 | 0,0006447 | 0,0037053 |          |
| ENSGALG00000014126 | 18,992333 | 1,207239433 | 0,3279747 | 3,6808919 | 0,0002324 | 0,0015558 | ENDOUL   |
| ENSGALG00000015764 | 5967,7523 | 1,20416113  | 0,1908692 | 6,3088274 | 2,81E-10  | 7,13E-09  | FABP5    |
| ENSGALG00000015528 | 170,23305 | 1,204136401 | 0,3006436 | 4,0051957 | 6,20E-05  | 0,0004943 | JAKMIP1  |
| ENSGALG00000002355 | 234,00639 | 1,203134529 | 0,2548917 | 4,7201799 | 2,36E-06  | 2,80E-05  | RBPMS2   |
| ENSGALG00000004641 | 146,28084 | 1,20257315  | 0,2965454 | 4,0552753 | 5,01E-05  | 0,0004122 | MYO5C    |
| ENSGALG00000026903 | 111,36196 | 1,200671289 | 0,3283141 | 3,6570806 | 0,0002551 | 0,0016869 | CALB2    |
| ENSGALG00000004745 | 1802,3575 | 1,199713581 | 0,141877  | 8,4560121 | 2,77E-17  | 1,74E-15  | NATD1    |
| ENSGALG00000013890 | 33,560749 | 1,1996045   | 0,3520141 | 3,4078307 | 0,0006548 | 0,0037491 | MC5R     |
| ENSGALG00000019280 | 990,72458 | 1,199070585 | 0,1733998 | 6,915063  | 4,68E-12  | 1,54E-10  | LMO3     |
| ENSGALG00000004066 | 55,61946  | 1,199060923 | 0,3539016 | 3,3881191 | 0,0007037 | 0,0039939 | HTR6     |
| ENSGALG00000002082 | 57,1028   | 1,198569946 | 0,3484813 | 3,4394093 | 0,000583  | 0,0034066 | AMPD1    |
| ENSGALG00000013090 | 44,714809 | 1,197838739 | 0,3538143 | 3,3855007 | 0,0007105 | 0,0040265 | LOXL4    |
| ENSGALG00000014696 | 222,59602 | 1,197793931 | 0,2597544 | 4,6112558 | 4,00E-06  | 4,51E-05  | ZBTB7C   |
| ENSGALG00000006922 | 19,384458 | 1,194740346 | 0,3271281 | 3,6522095 | 0,00026   | 0,0017142 | KCNJ14   |
| ENSGALG00000011489 | 4656,6813 | 1,193784841 | 0,1216657 | 9,8120096 | 1,00E-22  | 9,93E-21  |          |
| ENSGALG00000016590 | 18,890623 | 1,192009768 | 0,3270811 | 3,6443865 | 0,000268  | 0,001757  | TLR7     |
| ENSGALG00000002407 | 144,98036 | 1,191296249 | 0,3041418 | 3,9169112 | 8,97E-05  | 0,0006837 | HYDIN    |
| ENSGALG00000012890 | 273,96599 | 1,191168201 | 0,2640739 | 4,5107378 | 6,46E-06  | 6,90E-05  | DGKI     |
| ENSGALG00000027218 | 239,44089 | 1,190798556 | 0,2757781 | 4,317959  | 1,57E-05  | 0,0001524 |          |
| ENSGALG00000017040 | 33,080589 | 1,190245244 | 0,3523261 | 3,3782489 | 0,0007295 | 0,0041177 |          |
| ENSGALG00000008362 | 175,02358 | 1,190011885 | 0,2754196 | 4,3207232 | 1,56E-05  | 0,000151  | SSTR4    |
| ENSGALG00000004521 | 401,35326 | 1,187877806 | 0,2197321 | 5,4060281 | 6,44E-08  | 1,08E-06  | GPX3     |
| ENSGALG00000006074 | 272,24078 | 1,186152058 | 0,28359   | 4,1826293 | 2,88E-05  | 0,0002563 | SOX6     |
| ENSGALG00000003842 | 39,781188 | 1,185854219 | 0,3538378 | 3,3514066 | 0,000804  | 0,0044662 | GHRH     |
| ENSGALG00000021882 | 58,697437 | 1,185518376 | 0,3468224 | 3,4182285 | 0,0006303 | 0,0036347 |          |
| ENSGALG00000002744 | 252,46116 | 1,184999187 | 0,2518537 | 4,705109  | 2,54E-06  | 3,00E-05  | PCDH15   |
| ENSGALG00000006768 | 37,969199 | 1,18499895  | 0,3536582 | 3,3506896 | 0,0008061 | 0,0044728 |          |
| ENSGALG00000014812 | 711,71818 | 1,183271769 | 0,1870163 | 6,3271055 | 2,50E-10  | 6,39E-09  | SIDT1    |
| ENSGALG00000017331 | 630,73395 | 1,182854332 | 0,188652  | 6,2700317 | 3,61E-10  | 9,05E-09  | GDPD5    |
| ENSGALG00000005547 | 144,89722 | 1,180323703 | 0,2989787 | 3,9478524 | 7,89E-05  | 0,0006093 | PIK3AP1  |
| ENSGALG00000017291 | 662,46181 | 1,180080414 | 0,209044  | 5,6451284 | 1,65E-08  | 3,14E-07  | FAR2     |
| ENSGALG00000006308 | 28,078472 | 1,179461013 | 0,3370947 | 3,4989008 | 0,0004672 | 0,0028338 |          |
| ENSGALG00000013112 | 320,80404 | 1,179282262 | 0,2330597 | 5,0600015 | 4,19E-07  | 5,90E-06  | RERGL    |
| ENSGALG00000007333 | 325,51856 | 1,178440858 | 0,2584425 | 4,5597804 | 5,12E-06  | 5,65E-05  | UBAP1L   |
| ENSGALG00000001021 | 191,27134 | 1,17756894  | 0,2838137 | 4,1490906 | 3,34E-05  | 0,0002911 | MYOCD    |
| ENSGALG00000003821 | 322,04402 | 1,177115475 | 0,2347575 | 5,0141754 | 5,33E-07  | 7,38E-06  | RAMP1    |
| ENSGALG00000003164 | 243,86317 | 1,17697714  | 0,2590714 | 4,5430608 | 5,54E-06  | 6,04E-05  | DNM3     |
| ENSGALG00000016651 | 946,90096 | 1,174964335 | 0,1848632 | 6,35586   | 2,07E-10  | 5,41E-09  | TDH      |
| ENSGALG00000002435 | 70,191489 | 1,174947125 | 0,34691   | 3,3868933 | 0,0007069 | 0,0040085 | DUOX2    |
| ENSGALG00000001331 | 1782,6492 | 1,174179888 | 0,1437468 | 8,16839   | 3,13E-16  | 1,75E-14  | ST14     |
| ENSGALG00000009114 | 216,59264 | 1,170782693 | 0,2608026 | 4,4891525 | 7,15E-06  | 7,60E-05  | DGAT2    |
| ENSGALG00000028580 | 59,186277 | 1,170297276 | 0,3494653 | 3,3488229 | 0,0008116 | 0,0044934 | C15orf48 |
| ENSGALG00000006099 | 3185,4261 | 1,169037408 | 0,1372144 | 8,5197869 | 1,60E-17  | 1,03E-15  | ZFPM1    |
| ENSGALG00000014261 | 23192,424 | 1,166708788 | 0,1480767 | 7,8790822 | 3,30E-15  | 1,59E-13  | UCHL1    |
| ENSGALG00000006627 | 44,723529 | 1,164076921 | 0,352923  | 3,2983882 | 0,0009724 | 0,0052103 | UPB1     |
| ENSGALG00000012668 | 622,84546 | 1,1628752   | 0,2448035 | 4,7502395 | 2,03E-06  | 2,44E-05  | DCDC2    |
| ENSGALG00000011446 | 368,84385 | 1,161895934 | 0,2215158 | 5,2452066 | 1,56E-07  | 2,42E-06  | TNFAIP2  |
| ENSGALG00000005630 | 38,097087 | 1,161740711 | 0,3428362 | 3,3886172 | 0,0007025 | 0,0039883 | CRYBB1   |
| ENSGALG00000023879 | 439,21059 | 1,160823609 | 0,2116765 | 5,4839511 | 4,16E-08  | 7,24E-07  |          |
| ENSGALG00000007596 | 99,216367 | 1,160341621 | 0,3237884 | 3,5836422 | 0,0003388 | 0,0021608 |          |

|                    |           |             |           |           |           |           |          |
|--------------------|-----------|-------------|-----------|-----------|-----------|-----------|----------|
| ENSGALG00000005721 | 236,12764 | 1,159323873 | 0,251452  | 4,6105181 | 4,02E-06  | 4,52E-05  | DGKG     |
| ENSGALG00000013911 | 546,72587 | 1,159209839 | 0,2024827 | 5,7249821 | 1,03E-08  | 2,03E-07  | ZC3HAV1  |
| ENSGALG00000011418 | 18,242274 | 1,158885244 | 0,3251653 | 3,5639875 | 0,0003653 | 0,002297  | CCR6     |
| ENSGALG00000028489 | 20,536962 | 1,158414063 | 0,3317704 | 3,4916132 | 0,0004801 | 0,0029001 |          |
| ENSGALG00000001031 | 327,10314 | 1,156740289 | 0,2440319 | 4,7401197 | 2,14E-06  | 2,56E-05  | HSF5     |
| ENSGALG00000002016 | 953,70998 | 1,156233761 | 0,1649483 | 7,0096752 | 2,39E-12  | 8,30E-11  | PRKCD    |
| ENSGALG00000001095 | 18,255475 | 1,156162616 | 0,3249866 | 3,5575704 | 0,0003743 | 0,0023463 | CCDC183  |
| ENSGALG00000013980 | 288,26492 | 1,155390063 | 0,2983628 | 3,8724333 | 0,0001078 | 0,0007995 | SLC2A12  |
| ENSGALG00000026241 | 639,21895 | 1,154849081 | 0,2302822 | 5,0149306 | 5,31E-07  | 7,36E-06  | GRIN3B   |
| ENSGALG00000006208 | 100,69013 | 1,154488936 | 0,3219519 | 3,5859053 | 0,0003359 | 0,0021441 | OTOG     |
| ENSGALG00000009641 | 18352,412 | 1,153845642 | 0,1458991 | 7,9085187 | 2,60E-15  | 1,28E-13  | COL1A2   |
| ENSGALG00000012288 | 52,934002 | 1,152071153 | 0,3501204 | 3,2905002 | 0,0010001 | 0,0053293 | SLC16A8  |
| ENSGALG00000015932 | 523,70552 | 1,152042382 | 0,2240419 | 5,1420853 | 2,72E-07  | 3,98E-06  | KCNQ5    |
| ENSGALG00000003789 | 56,043715 | 1,151405842 | 0,3500328 | 3,2894227 | 0,0010039 | 0,0053476 | FAM78A   |
| ENSGALG00000010365 | 313,07869 | 1,151056068 | 0,2620814 | 4,39198   | 1,12E-05  | 0,0001143 | ESRRB    |
| ENSGALG00000017691 | 74,633315 | 1,149429932 | 0,3427848 | 3,3532112 | 0,0007988 | 0,0044427 |          |
| ENSGALG00000017374 | 478,61541 | 1,149174538 | 0,2222568 | 5,1704808 | 2,33E-07  | 3,48E-06  | SLITRK3  |
| ENSGALG00000028710 | 21,101173 | 1,148265888 | 0,3321095 | 3,4574919 | 0,0005452 | 0,0032233 |          |
| ENSGALG00000012374 | 515,33143 | 1,147327656 | 0,1949041 | 5,8866278 | 3,94E-09  | 8,55E-08  | FRMD6    |
| ENSGALG00000016328 | 5259,3238 | 1,146952103 | 0,1404012 | 8,1691038 | 3,11E-16  | 1,75E-14  | GSTA     |
| ENSGALG00000025721 | 19,243146 | 1,146921853 | 0,324147  | 3,5382766 | 0,0004027 | 0,0025004 |          |
| ENSGALG00000012365 | 9658,5394 | 1,146353139 | 0,1101377 | 10,408358 | 2,27E-25  | 2,97E-23  | PYGL     |
| ENSGALG00000005540 | 392,97544 | 1,145405784 | 0,219512  | 5,2179637 | 1,81E-07  | 2,76E-06  | MICAL2   |
| ENSGALG00000028702 | 48,721731 | 1,145044679 | 0,3522221 | 3,2509165 | 0,0011503 | 0,0060053 | EVX1     |
| ENSGALG00000022819 | 93,418767 | 1,14482978  | 0,3365037 | 3,4021308 | 0,0006686 | 0,0038249 | PCP4     |
| ENSGALG00000001968 | 55,570176 | 1,14394352  | 0,3522778 | 3,2472771 | 0,0011651 | 0,006064  | SYT6     |
| ENSGALG00000012505 | 1173,094  | 1,142096363 | 0,156235  | 7,3101186 | 2,67E-13  | 1,05E-11  | LRFN5    |
| ENSGALG00000015758 | 1198,984  | 1,141437782 | 0,170779  | 6,6837117 | 2,33E-11  | 6,96E-10  | PAG1     |
| ENSGALG00000003876 | 41,544916 | 1,140755556 | 0,3447861 | 3,3085895 | 0,0009377 | 0,0050721 | TIMD4    |
| ENSGALG00000009791 | 992,57388 | 1,140657464 | 0,2126878 | 5,3630614 | 8,18E-08  | 1,34E-06  | PROX1    |
| ENSGALG00000028130 | 1683,1758 | 1,140619832 | 0,1589917 | 7,1740827 | 7,28E-13  | 2,72E-11  | KIAA1644 |
| ENSGALG00000010673 | 22,777798 | 1,139845847 | 0,3403007 | 3,3495255 | 0,0008095 | 0,0044839 | SLC1A7   |
| ENSGALG00000006436 | 58,776846 | 1,138634151 | 0,3530266 | 3,2253491 | 0,0012582 | 0,0064643 | AQP12    |
| ENSGALG00000000620 | 143,16144 | 1,137872957 | 0,293674  | 3,8746119 | 0,0001068 | 0,0007954 | FABP3    |
| ENSGALG00000013818 | 524,97865 | 1,136933045 | 0,2108978 | 5,3909206 | 7,01E-08  | 1,17E-06  | CITED2   |
| ENSGALG00000007236 | 26,585317 | 1,136243459 | 0,3440899 | 3,30217   | 0,0009594 | 0,005167  | PLA2G1BL |
| ENSGALG00000023643 | 36,522348 | 1,136155947 | 0,3539078 | 3,2103166 | 0,0013259 | 0,0067509 |          |
| ENSGALG00000007129 | 549,58573 | 1,134513156 | 0,2759889 | 4,1107204 | 3,94E-05  | 0,0003371 | ALDH1A3  |
| ENSGALG00000001442 | 382,78952 | 1,131898366 | 0,2156493 | 5,248791  | 1,53E-07  | 2,37E-06  | OPCML    |
| ENSGALG00000000217 | 558,86585 | 1,131400306 | 0,2196843 | 5,1501182 | 2,60E-07  | 3,84E-06  | PPFIA4   |
| ENSGALG00000000911 | 18,802113 | 1,131377385 | 0,3232235 | 3,5002948 | 0,0004647 | 0,002821  | IL19     |
| ENSGALG00000003028 | 252,86338 | 1,131167716 | 0,2536539 | 4,4594925 | 8,22E-06  | 8,64E-05  | ADAMTS13 |
| ENSGALG00000027626 | 26,263554 | 1,129092221 | 0,3472331 | 3,251684  | 0,0011472 | 0,0059985 |          |
| ENSGALG00000008063 | 112,83661 | 1,129089778 | 0,3199799 | 3,5286266 | 0,0004177 | 0,0025816 | NOX5     |
| ENSGALG00000016592 | 75,509326 | 1,127895523 | 0,3458232 | 3,2614806 | 0,0011083 | 0,0058217 | PRPS2    |
| ENSGALG00000021529 | 183,02929 | 1,127864143 | 0,273066  | 4,1303714 | 3,62E-05  | 0,0003123 | GP1BB    |
| ENSGALG00000006503 | 1322,5302 | 1,127315674 | 0,1739831 | 6,4794533 | 9,21E-11  | 2,52E-09  | VDAC1    |
| ENSGALG00000026333 | 170,5148  | 1,126889713 | 0,280963  | 4,0108121 | 6,05E-05  | 0,0004843 | GNGT2    |
| ENSGALG00000015348 | 3709,6553 | 1,126202791 | 0,1601094 | 7,03396   | 2,01E-12  | 7,08E-11  | ALCAM    |
| ENSGALG00000027872 | 562,41556 | 1,125834202 | 0,2065498 | 5,4506672 | 5,02E-08  | 8,57E-07  |          |
| ENSGALG00000007964 | 712,00528 | 1,125506336 | 0,1939073 | 5,8043524 | 6,46E-09  | 1,32E-07  | GATSL3   |
| ENSGALG00000008940 | 122,07312 | 1,125469701 | 0,3044547 | 3,6966742 | 0,0002184 | 0,0014752 | SPTBN5   |
| ENSGALG00000012252 | 31,066473 | 1,124245419 | 0,3463855 | 3,2456478 | 0,0011718 | 0,0060895 |          |
| ENSGALG00000009237 | 283,64685 | 1,124183808 | 0,2526532 | 4,4495132 | 8,61E-06  | 9,03E-05  | TLR2A    |
| ENSGALG00000008629 | 362,4306  | 1,122527446 | 0,2874644 | 3,9049269 | 9,43E-05  | 0,0007125 |          |
| ENSGALG00000004649 | 115,31891 | 1,122312882 | 0,3390875 | 3,3098029 | 0,0009336 | 0,0050602 | TRPV1    |
| ENSGALG00000016821 | 91,586414 | 1,121951764 | 0,3275569 | 3,4252114 | 0,0006143 | 0,0035683 | TMEM255B |
| ENSGALG00000000994 | 36,33755  | 1,120119947 | 0,3533528 | 3,1699761 | 0,0015245 | 0,0075368 | RAB42    |
| ENSGALG00000009943 | 1812,2354 | 1,119992507 | 0,1420982 | 7,8818219 | 3,23E-15  | 1,56E-13  | FAM117A  |
| ENSGALG00000028795 | 3146,8331 | 1,118039364 | 0,160426  | 6,9691886 | 3,19E-12  | 1,09E-10  | CADM3    |
| ENSGALG00000026758 | 74,554613 | 1,11741437  | 0,3353836 | 3,33175   | 0,000863  | 0,0047277 |          |
| ENSGALG00000001204 | 1443,1255 | 1,117076992 | 0,1466887 | 7,6152892 | 2,63E-14  | 1,19E-12  | ENKD1    |

|                    |           |             |           |           |           |           |               |
|--------------------|-----------|-------------|-----------|-----------|-----------|-----------|---------------|
| ENSGALG00000012055 | 30,631938 | 1,115864912 | 0,3495485 | 3,1923038 | 0,0014114 | 0,0070989 | TGFBR2L       |
| ENSGALG00000015469 | 3626,2078 | 1,115704157 | 0,1321025 | 8,4457457 | 3,02E-17  | 1,89E-15  | IGSF3         |
| ENSGALG00000009963 | 76,780039 | 1,114244364 | 0,3375856 | 3,3006277 | 0,0009647 | 0,0051852 | LYZ           |
| ENSGALG00000011414 | 712,8987  | 1,112714675 | 0,1796621 | 6,1933742 | 5,89E-10  | 1,44E-08  | AMDHD1        |
| ENSGALG00000015454 | 87,061362 | 1,111985108 | 0,3376828 | 3,2929875 | 0,0009913 | 0,0052948 | CA8           |
| ENSGALG00000010233 | 149,38519 | 1,111330421 | 0,289789  | 3,8349641 | 0,0001256 | 0,0009114 | SYNDIG1L      |
| ENSGALG00000024411 | 95,571509 | 1,110994905 | 0,322591  | 3,4439741 | 0,0005732 | 0,0033582 | C2orf82       |
| ENSGALG00000003016 | 111,9759  | 1,109545556 | 0,3100714 | 3,5783554 | 0,0003458 | 0,0021977 | MASP2         |
| ENSGALG00000006792 | 447,85614 | 1,109047707 | 0,21888   | 5,0669216 | 4,04E-07  | 5,71E-06  | VSTM2L        |
| ENSGALG00000009823 | 207,86307 | 1,108978484 | 0,2670183 | 4,1531933 | 3,28E-05  | 0,0002863 | PTPRE         |
| ENSGALG00000027501 | 1178,2304 | 1,108782799 | 0,1555553 | 7,1279016 | 1,02E-12  | 3,72E-11  | ANPEP         |
| ENSGALG00000004017 | 335,24395 | 1,108435951 | 0,2275944 | 4,8702245 | 1,11E-06  | 1,44E-05  | TOR1AIP2      |
| ENSGALG00000025912 | 62,633971 | 1,108425226 | 0,3437693 | 3,2243285 | 0,0012627 | 0,00648   |               |
| ENSGALG00000000158 | 209,10615 | 1,107475494 | 0,2643096 | 4,1900691 | 2,79E-05  | 0,0002495 | DMA           |
| ENSGALG00000002610 | 604,59063 | 1,105862871 | 0,189678  | 5,8302128 | 5,54E-09  | 1,15E-07  |               |
| ENSGALG00000023621 | 702,55001 | 1,105773477 | 0,197195  | 5,6075141 | 2,05E-08  | 3,82E-07  | SFXN3         |
| ENSGALG00000009574 | 24,975698 | 1,105678443 | 0,3438055 | 3,216     | 0,0012999 | 0,0066483 | IL12A         |
| ENSGALG00000006000 | 170,90987 | 1,105166021 | 0,292418  | 3,7794044 | 0,0001572 | 0,0011107 | ADAMTS2       |
| ENSGALG00000001011 | 623,47251 | 1,104831537 | 0,2206424 | 5,00734   | 5,52E-07  | 7,61E-06  | CNGB1         |
| ENSGALG00000011473 | 347,60043 | 1,104703027 | 0,2275411 | 4,8549595 | 1,20E-06  | 1,54E-05  | RPS6KA2       |
| ENSGALG00000026834 | 233,70852 | 1,10373431  | 0,2598301 | 4,2479073 | 2,16E-05  | 0,0002001 | PPAP2C        |
| ENSGALG00000006003 | 58,995483 | 1,10329195  | 0,3504724 | 3,1480138 | 0,0016438 | 0,0080223 | C10orf10      |
| ENSGALG00000001281 | 270,65777 | 1,101845994 | 0,2489516 | 4,4259451 | 9,60E-06  | 9,94E-05  | PHOSPHO1      |
| ENSGALG00000006407 | 926,88526 | 1,100961832 | 0,1782262 | 6,1773296 | 6,52E-10  | 1,58E-08  |               |
| ENSGALG00000011003 | 180,05065 | 1,099169303 | 0,2856147 | 3,8484334 | 0,0001189 | 0,0008669 | SLC35F3       |
| ENSGALG00000000168 | 20,237218 | 1,099055711 | 0,3363625 | 3,2674737 | 0,0010851 | 0,0057152 | ADORA1        |
| ENSGALG00000014798 | 1444,6552 | 1,098754437 | 0,1853247 | 5,9288075 | 3,05E-09  | 6,69E-08  | RP11-296A16.1 |
| ENSGALG00000015076 | 118,81874 | 1,094512369 | 0,3047536 | 3,5914667 | 0,0003288 | 0,0021068 |               |
| ENSGALG00000002579 | 438,86248 | 1,09231668  | 0,2407976 | 4,5362436 | 5,73E-06  | 6,21E-05  | RIMBP2        |
| ENSGALG00000027102 | 27,931361 | 1,090659115 | 0,3485566 | 3,129073  | 0,0017536 | 0,0084616 |               |
| ENSGALG00000007740 | 159,04973 | 1,089704597 | 0,297943  | 3,6574259 | 0,0002548 | 0,0016854 |               |
| ENSGALG00000004972 | 200,69424 | 1,089536909 | 0,3028577 | 3,5975215 | 0,0003213 | 0,0020613 | ALKBH5        |
| ENSGALG00000004538 | 131,20236 | 1,088596778 | 0,3003085 | 3,6249277 | 0,000289  | 0,001882  | TNN           |
| ENSGALG00000005470 | 915,92774 | 1,087631823 | 0,1770332 | 6,1436603 | 8,06E-10  | 1,93E-08  | LPPR5         |
| ENSGALG00000006189 | 81,047665 | 1,08750661  | 0,3396623 | 3,2017288 | 0,0013661 | 0,0069166 | CRYGN         |
| ENSGALG00000001716 | 219,08602 | 1,084481493 | 0,276627  | 3,9203751 | 8,84E-05  | 0,0006759 | C15orf59      |
| ENSGALG00000017106 | 609,78404 | 1,082115941 | 0,1927819 | 5,6131603 | 1,99E-08  | 3,72E-07  | ATP8A2        |
| ENSGALG00000014264 | 24,119483 | 1,081789708 | 0,3421863 | 3,1614055 | 0,0015701 | 0,0077368 | NSUN7         |
| ENSGALG00000001470 | 804,49858 | 1,081645785 | 0,1818986 | 5,9464233 | 2,74E-09  | 6,10E-08  | STOML1        |
| ENSGALG00000023636 | 80,78387  | 1,079731402 | 0,3357478 | 3,2159003 | 0,0013004 | 0,0066483 | REM1          |
| ENSGALG00000021303 | 70,179062 | 1,078464744 | 0,3387078 | 3,1840559 | 0,0014523 | 0,0072578 | NPY7R         |
| ENSGALG00000011353 | 167,02407 | 1,077984355 | 0,2948088 | 3,6565536 | 0,0002556 | 0,0016887 | TNNI3K        |
| ENSGALG00000027354 | 35,225101 | 1,077448801 | 0,3534209 | 3,048628  | 0,0022989 | 0,0105741 | MPND          |
| ENSGALG00000026651 | 469,2115  | 1,076820994 | 0,2627359 | 4,0984919 | 4,16E-05  | 0,0003517 | SCARA3        |
| ENSGALG00000005031 | 222,86675 | 1,076697936 | 0,2761103 | 3,8995209 | 9,64E-05  | 0,000727  | DRP2          |
| ENSGALG00000005076 | 658,30851 | 1,075685444 | 0,2013532 | 5,3422809 | 9,18E-08  | 1,49E-06  | GUCY1B4       |
| ENSGALG00000013180 | 23,783592 | 1,075255786 | 0,3379303 | 3,1818859 | 0,0014632 | 0,0072892 | SLC6A18       |
| ENSGALG00000004043 | 1743,1221 | 1,074636101 | 0,1810984 | 5,9339914 | 2,96E-09  | 6,52E-08  | NBL1          |
| ENSGALG00000008822 | 37,095962 | 1,073866227 | 0,3512806 | 3,0570039 | 0,0022356 | 0,0103284 |               |
| ENSGALG00000000420 | 275,78606 | 1,072751202 | 0,2433406 | 4,4084345 | 1,04E-05  | 0,000107  | KLHDC7A       |
| ENSGALG00000021559 | 51,236888 | 1,072736007 | 0,3500464 | 3,0645537 | 0,00218   | 0,0101332 | CD14          |
| ENSGALG00000003640 | 1881,5268 | 1,071788322 | 0,1472843 | 7,2770018 | 3,41E-13  | 1,33E-11  | FAM20C        |
| ENSGALG00000009355 | 164,05056 | 1,070935457 | 0,2815733 | 3,8033985 | 0,0001427 | 0,0010204 | CLDN11        |
| ENSGALG00000026748 | 19,49545  | 1,069944148 | 0,3278792 | 3,2632271 | 0,0011015 | 0,0057881 | MYH1A         |
| ENSGALG00000020492 | 36,098876 | 1,069561713 | 0,3538691 | 3,0224786 | 0,0025071 | 0,0113329 | MUC6          |
| ENSGALG00000004406 | 128,12145 | 1,066534863 | 0,3115962 | 3,4228111 | 0,0006198 | 0,0035892 | LRRC43        |
| ENSGALG00000006370 | 31,168172 | 1,066397762 | 0,3455845 | 3,0857802 | 0,0020302 | 0,0095644 | TULP1         |
| ENSGALG00000012377 | 68,881814 | 1,065846022 | 0,3384914 | 3,148813  | 0,0016394 | 0,0080143 | HNMT          |
| ENSGALG00000006344 | 48,374655 | 1,06541292  | 0,3514839 | 3,0311857 | 0,002436  | 0,0110921 | GSTT1         |
| ENSGALG00000010752 | 133,53254 | 1,063752645 | 0,3170147 | 3,3555312 | 0,0007921 | 0,0044138 | CDCP2         |
| ENSGALG00000021049 | 25,160532 | 1,063749147 | 0,3349924 | 3,175443  | 0,0014961 | 0,0074177 | FNDC11        |
| ENSGALG00000006374 | 154,22163 | 1,06372742  | 0,3461141 | 3,0733436 | 0,0021167 | 0,0099138 | TBX6          |

|                     |           |             |           |           |           |           |           |
|---------------------|-----------|-------------|-----------|-----------|-----------|-----------|-----------|
| ENSGALG00000007780  | 1769,7678 | 1,063721106 | 0,1641554 | 6,4799655 | 9,17E-11  | 2,52E-09  | EIF4E3    |
| ENSGALG00000004149  | 50,119553 | 1,06296288  | 0,353007  | 3,0111663 | 0,0026025 | 0,01169   | KCNK15    |
| ENSGALG000000021542 | 348,90792 | 1,061917275 | 0,2447028 | 4,3396212 | 1,43E-05  | 0,000141  | SNCB      |
| ENSGALG00000002055  | 5059,126  | 1,061032342 | 0,1289624 | 8,2274527 | 1,91E-16  | 1,10E-14  | HES4      |
| ENSGALG000000028742 | 318,00325 | 1,06018982  | 0,2447624 | 4,3315054 | 1,48E-05  | 0,0001453 |           |
| ENSGALG00000001040  | 379,37277 | 1,060173693 | 0,2265161 | 4,6803463 | 2,86E-06  | 3,34E-05  | MEGF6     |
| ENSGALG00000008734  | 1277,1497 | 1,060092794 | 0,1784849 | 5,9393992 | 2,86E-09  | 6,33E-08  | PCSK2     |
| ENSGALG000000025771 | 418,4548  | 1,059868939 | 0,2130592 | 4,9745277 | 6,54E-07  | 8,82E-06  | PLCD3     |
| ENSGALG000000017311 | 141,94595 | 1,059578058 | 0,2931335 | 3,6146605 | 0,0003007 | 0,0019465 | P4HA3     |
| ENSGALG000000026017 | 67,59259  | 1,059475908 | 0,3510549 | 3,0179783 | 0,0025447 | 0,0114759 | DRGX      |
| ENSGALG00000002554  | 211,29924 | 1,058725863 | 0,2726542 | 3,8830359 | 0,0001032 | 0,0007721 | TSPAN2    |
| ENSGALG000000011898 | 1941,7841 | 1,056447793 | 0,1400944 | 7,5409707 | 4,66E-14  | 2,00E-12  | FAM109B   |
| ENSGALG000000012545 | 20,395626 | 1,051934631 | 0,3331292 | 3,1577373 | 0,00159   | 0,0078066 | CYTIP     |
| ENSGALG000000016620 | 37,122352 | 1,049979269 | 0,351653  | 2,9858389 | 0,002828  | 0,0125541 | PNOC      |
| ENSGALG000000010497 | 795,79291 | 1,048579632 | 0,1787889 | 5,8649021 | 4,49E-09  | 9,56E-08  | SLC29A4   |
| ENSGALG000000000503 | 90,521684 | 1,0483641   | 0,3288307 | 3,1881578 | 0,0014318 | 0,0071802 | PADI2     |
| ENSGALG000000007959 | 24,992818 | 1,04699816  | 0,3339903 | 3,134816  | 0,0017196 | 0,0083253 | SLC26A3   |
| ENSGALG000000012045 | 94,161025 | 1,046487546 | 0,3346828 | 3,1268044 | 0,0017672 | 0,0085078 | SLC12A8   |
| ENSGALG000000009340 | 441,50856 | 1,044750001 | 0,2505951 | 4,1690755 | 3,06E-05  | 0,0002702 | TRIM63    |
| ENSGALG000000007617 | 161,13247 | 1,044420437 | 0,3032396 | 3,4442081 | 0,0005727 | 0,0033568 | ANO1      |
| ENSGALG000000006854 | 35,896481 | 1,044373279 | 0,3538993 | 2,9510467 | 0,003167  | 0,0137583 | NEURL2    |
| ENSGALG000000007837 | 153,44217 | 1,044277791 | 0,317273  | 3,2914167 | 0,0009968 | 0,0053161 | KAZALD1   |
| ENSGALG000000001252 | 75,259479 | 1,044188086 | 0,3423423 | 3,0501291 | 0,0022874 | 0,0105321 | CREB3L3   |
| ENSGALG000000009588 | 47,706596 | 1,044149084 | 0,3525375 | 2,9618103 | 0,0030584 | 0,0133846 |           |
| ENSGALG000000016020 | 82,686873 | 1,041815502 | 0,331022  | 3,1472698 | 0,001648  | 0,0080365 | CLIC6     |
| ENSGALG000000016608 | 1071,038  | 1,041630113 | 0,1614881 | 6,4501978 | 1,12E-10  | 3,01E-09  | ADCY3     |
| ENSGALG000000014258 | 1564,4528 | 1,040436704 | 0,1704968 | 6,1023832 | 1,04E-09  | 2,47E-08  | LIMCH1    |
| ENSGALG000000027096 | 1851,9247 | 1,040113834 | 0,1377861 | 7,5487579 | 4,39E-14  | 1,90E-12  | LGALSL    |
| ENSGALG000000024369 | 197,40751 | 1,038738473 | 0,2651565 | 3,917454  | 8,95E-05  | 0,0006826 |           |
| ENSGALG000000028234 | 617,7355  | 1,03829388  | 0,1910987 | 5,4332854 | 5,53E-08  | 9,37E-07  | SYNDIG1   |
| ENSGALG000000007219 | 1265,6281 | 1,038287687 | 0,1548697 | 6,7042673 | 2,02E-11  | 6,12E-10  | FGF12     |
| ENSGALG000000007253 | 1268,2995 | 1,036667095 | 0,1580585 | 6,5587573 | 5,43E-11  | 1,54E-09  | IL1RAP    |
| ENSGALG000000005460 | 763,14713 | 1,036332157 | 0,1841326 | 5,6281837 | 1,82E-08  | 3,43E-07  | SLCO4A1   |
| ENSGALG000000005951 | 50,333342 | 1,035951706 | 0,3500228 | 2,9596694 | 0,0030797 | 0,0134575 | VPS29L    |
| ENSGALG000000026714 | 2323,4921 | 1,035206481 | 0,1567075 | 6,6059781 | 3,95E-11  | 1,13E-09  | SHISA2    |
| ENSGALG000000024122 | 36,985836 | 1,03453695  | 0,3344358 | 3,0933796 | 0,0019789 | 0,0093558 | TNFRSF13B |
| ENSGALG000000023779 | 766,12884 | 1,033222085 | 0,198913  | 5,1943408 | 2,05E-07  | 3,11E-06  | TMEM82    |
| ENSGALG000000028318 | 1679,8373 | 1,033139386 | 0,1849882 | 5,584894  | 2,34E-08  | 4,28E-07  | CDKN1A    |
| ENSGALG000000005114 | 245,74674 | 1,032666035 | 0,2545785 | 4,0563754 | 4,98E-05  | 0,0004108 | CES1      |
| ENSGALG000000028628 | 176,65893 | 1,032210406 | 0,27931   | 3,6955723 | 0,0002194 | 0,0014809 | LAPTM4B   |
| ENSGALG000000011875 | 520,49686 | 1,032103241 | 0,2093207 | 4,9307268 | 8,19E-07  | 1,08E-05  | TRPC3     |
| ENSGALG000000001304 | 107,91968 | 1,031984172 | 0,3164648 | 3,2609758 | 0,0011103 | 0,0058298 | TMEM52    |
| ENSGALG000000002459 | 72,761835 | 1,030692731 | 0,3400622 | 3,0308944 | 0,0024383 | 0,0110991 |           |
| ENSGALG000000004860 | 237,1229  | 1,03038994  | 0,2518626 | 4,0910789 | 4,29E-05  | 0,00036   | RASD1     |
| ENSGALG000000010566 | 1230,6364 | 1,029946325 | 0,1643356 | 6,2673336 | 3,67E-10  | 9,18E-09  | NPNT      |
| ENSGALG000000012791 | 100,57094 | 1,028853172 | 0,3257471 | 3,1584418 | 0,0015861 | 0,0077906 | TBXAS1    |
| ENSGALG000000024024 | 333,88236 | 1,028182094 | 0,2283532 | 4,5025956 | 6,71E-06  | 7,16E-05  | TGFA      |
| ENSGALG000000009739 | 1255,1864 | 1,027863615 | 0,1833266 | 5,6067343 | 2,06E-08  | 3,83E-07  | AMIGO2    |
| ENSGALG000000010078 | 138,04602 | 1,027109659 | 0,2951454 | 3,4800125 | 0,0005014 | 0,0030072 | GLP1R     |
| ENSGALG000000003349 | 284,81496 | 1,025286613 | 0,2360846 | 4,3428788 | 1,41E-05  | 0,0001392 | PLEKHA2   |
| ENSGALG000000009722 | 2700,6877 | 1,024969081 | 0,1274848 | 8,0399312 | 8,99E-16  | 4,78E-14  | DYNC1I1   |
| ENSGALG000000013200 | 141,95986 | 1,024952745 | 0,3004034 | 3,4119214 | 0,0006451 | 0,0037057 | GABBR2    |
| ENSGALG000000029169 | 143,48628 | 1,024627176 | 0,2979791 | 3,4385878 | 0,0005848 | 0,003414  | HHEX      |
| ENSGALG000000026420 | 49,217095 | 1,024145559 | 0,3514259 | 2,9142577 | 0,0035654 | 0,0152027 | CSF3      |
| ENSGALG000000013934 | 77,966051 | 1,022547067 | 0,3347704 | 3,0544729 | 0,0022546 | 0,0103983 | FAM196A   |
| ENSGALG000000002370 | 25,819164 | 1,022537057 | 0,3456971 | 2,957899  | 0,0030974 | 0,0135165 | SH2D4B    |
| ENSGALG000000028153 | 28,525881 | 1,022401628 | 0,3430351 | 2,9804582 | 0,0028782 | 0,012727  | FOXE1     |
| ENSGALG000000012470 | 43,321678 | 1,020606107 | 0,3536746 | 2,8857204 | 0,0039052 | 0,0163839 | LYPD6     |
| ENSGALG000000026070 | 69,472965 | 1,019730322 | 0,3407891 | 2,9922619 | 0,0027692 | 0,0123558 |           |
| ENSGALG000000025906 | 86,105418 | 1,019071961 | 0,3299575 | 3,088495  | 0,0020117 | 0,0094905 |           |
| ENSGALG000000012564 | 122,7387  | 1,018929434 | 0,3020158 | 3,3737619 | 0,0007415 | 0,0041682 |           |
| ENSGALG000000009686 | 819,70472 | 1,017336386 | 0,2030924 | 5,0092304 | 5,46E-07  | 7,54E-06  | PPP1R9A   |

|                     |           |             |           |           |           |           |         |
|---------------------|-----------|-------------|-----------|-----------|-----------|-----------|---------|
| ENSGALG00000001698  | 101,57773 | 1,017252154 | 0,3196233 | 3,1826597 | 0,0014593 | 0,0072777 | GABRA1  |
| ENSGALG00000002991  | 1547,8463 | 1,016425478 | 0,1518876 | 6,6919594 | 2,20E-11  | 6,60E-10  | ARID5B  |
| ENSGALG00000001191  | 726,03044 | 1,014738695 | 0,1760749 | 5,7631095 | 8,26E-09  | 1,66E-07  | MEOX1   |
| ENSGALG00000009066  | 83,156898 | 1,013658719 | 0,3282182 | 3,0883687 | 0,0020126 | 0,0094913 | KCND2   |
| ENSGALG00000003571  | 35,860323 | 1,013482972 | 0,3515721 | 2,882717  | 0,0039426 | 0,0164962 | KIF12   |
| ENSGALG000000024381 | 18,525889 | 1,013267738 | 0,3321669 | 3,050478  | 0,0022848 | 0,0105234 | LARP6L  |
| ENSGALG000000016223 | 759,19748 | 1,013131958 | 0,1825727 | 5,5491961 | 2,87E-08  | 5,19E-07  | MAOB    |
| ENSGALG000000012307 | 29,303894 | 1,012697653 | 0,3486352 | 2,904749  | 0,0036755 | 0,015599  | GALR3   |
| ENSGALG000000010203 | 639,91361 | 1,012100046 | 0,1964193 | 5,1527526 | 2,57E-07  | 3,79E-06  |         |
| ENSGALG000000017362 | 22,179359 | 1,011846131 | 0,3421939 | 2,9569383 | 0,0031071 | 0,0135504 |         |
| ENSGALG000000008874 | 19,446543 | 1,010524458 | 0,323522  | 3,1235106 | 0,0017871 | 0,0085793 | SLC13A1 |
| ENSGALG000000022718 | 221,71371 | 1,010197798 | 0,2618613 | 3,8577596 | 0,0001144 | 0,0008403 | FUT4    |
| ENSGALG000000014455 | 15,37556  | 1,009369671 | 0,3151604 | 3,2027176 | 0,0013614 | 0,0068955 | LPAR5   |
| ENSGALG000000008080 | 251,32912 | 1,008867324 | 0,2511963 | 4,01625   | 5,91E-05  | 0,0004755 | C1QTNF4 |
| ENSGALG000000021655 | 77,574154 | 1,008428495 | 0,3474014 | 2,902776  | 0,0036987 | 0,015683  | BCL2L15 |
| ENSGALG000000001951 | 315,95633 | 1,007959576 | 0,2412905 | 4,1773687 | 2,95E-05  | 0,0002612 | FAM102B |
| ENSGALG000000025876 | 51,163718 | 1,007886002 | 0,3524372 | 2,8597604 | 0,0042396 | 0,0175022 | THPO    |
| ENSGALG000000027712 | 289,19222 | 1,006836187 | 0,246269  | 4,0883601 | 4,34E-05  | 0,0003633 |         |
| ENSGALG000000005094 | 32,433793 | 1,005780474 | 0,350919  | 2,8661325 | 0,0041552 | 0,0172007 | GRAP    |
| ENSGALG000000028186 | 897,73377 | 1,005437673 | 0,1860189 | 5,4050306 | 6,48E-08  | 1,09E-06  | RERG    |
| ENSGALG000000003816 | 91,378339 | 1,005135037 | 0,3271198 | 3,0726821 | 0,0021214 | 0,009926  | NT5C1A  |
| ENSGALG000000004653 | 66,385404 | 1,003752617 | 0,3500053 | 2,8678215 | 0,0041331 | 0,0171352 | CDH23   |
| ENSGALG000000007713 | 153,5491  | 1,002069085 | 0,297438  | 3,3690019 | 0,0007544 | 0,0042333 | CD300A  |
| ENSGALG000000026584 | 85,189769 | 1,001767633 | 0,3522109 | 2,844227  | 0,0044519 | 0,0181912 |         |
| ENSGALG000000016251 | 6835,3703 | 1,000647408 | 0,1546994 | 6,4683351 | 9,91E-11  | 2,69E-09  | TSPAN7  |
| ENSGALG000000028962 | 99,714152 | 1,000589641 | 0,3302214 | 3,030057  | 0,0024451 | 0,0111225 |         |
| ENSGALG000000023953 | 637,17536 | 0,998916427 | 0,1866162 | 5,3527844 | 8,66E-08  | 1,41E-06  |         |
| ENSGALG000000005887 | 163,6325  | 0,998359123 | 0,3075104 | 3,2465868 | 0,001168  | 0,0060741 | PXDNL   |
| ENSGALG000000009511 | 29,357161 | 0,996402413 | 0,3503011 | 2,8444172 | 0,0044493 | 0,0181858 | SI      |
| ENSGALG000000012480 | 541,53262 | 0,99597856  | 0,2064035 | 4,8253958 | 1,40E-06  | 1,76E-05  | NMI     |
| ENSGALG000000014681 | 398,45148 | 0,995892967 | 0,2311425 | 4,3085667 | 1,64E-05  | 0,0001581 | PCSK1   |
| ENSGALG000000000172 | 20,017715 | 0,995836198 | 0,3363958 | 2,9603109 | 0,0030733 | 0,013437  | MYOG    |
| ENSGALG000000017316 | 218,98095 | 0,995598244 | 0,3012626 | 3,3047519 | 0,0009506 | 0,0051298 | UCP3    |
| ENSGALG000000007045 | 32,468926 | 0,994891941 | 0,3526069 | 2,8215327 | 0,0047795 | 0,0193208 | GPR123  |
| ENSGALG000000005467 | 75,167039 | 0,994871662 | 0,3408309 | 2,9189596 | 0,003512  | 0,0150035 | HSD17B2 |
| ENSGALG000000001453 | 365,61787 | 0,994068241 | 0,2454962 | 4,0492198 | 5,14E-05  | 0,0004207 | FAM110D |
| ENSGALG000000002437 | 722,53208 | 0,993124174 | 0,1885536 | 5,2670664 | 1,39E-07  | 2,17E-06  | FAM69B  |
| ENSGALG000000012613 | 121,97261 | 0,992227725 | 0,3163097 | 3,1368866 | 0,0017075 | 0,0082733 | FBP1    |
| ENSGALG000000015094 | 84,375027 | 0,9904996   | 0,3373138 | 2,9364333 | 0,0033201 | 0,0142958 | ZBTB20  |
| ENSGALG000000028682 | 130,82591 | 0,990483134 | 0,3063312 | 3,2333734 | 0,0012234 | 0,006314  |         |
| ENSGALG000000013183 | 389,46671 | 0,988585254 | 0,2164446 | 4,5673816 | 4,94E-06  | 5,48E-05  | TERT    |
| ENSGALG000000002766 | 25,140518 | 0,98837641  | 0,3444585 | 2,8693625 | 0,004113  | 0,0170883 | MLKL    |
| ENSGALG000000009638 | 342,69847 | 0,988233263 | 0,2260661 | 4,3714351 | 1,23E-05  | 0,0001244 | ANO6    |
| ENSGALG000000016224 | 196,09798 | 0,988198095 | 0,2772614 | 3,5641386 | 0,0003651 | 0,0022968 | MAOA    |
| ENSGALG000000009052 | 3269,1548 | 0,987910707 | 0,1624129 | 6,0827127 | 1,18E-09  | 2,78E-08  | LBH     |
| ENSGALG000000026042 | 849,9138  | 0,987626868 | 0,2371785 | 4,1640662 | 3,13E-05  | 0,0002751 | SHISA3  |
| ENSGALG000000012536 | 763,86305 | 0,987580114 | 0,2116261 | 4,6666263 | 3,06E-06  | 3,54E-05  | GALNT13 |
| ENSGALG000000016599 | 16,001403 | 0,987073109 | 0,3131543 | 3,1520339 | 0,0016214 | 0,0079321 | MFAP4   |
| ENSGALG000000008638 | 22,301546 | 0,987044947 | 0,3280366 | 3,008948  | 0,0026215 | 0,011768  |         |
| ENSGALG000000009463 | 2838,7047 | 0,986691121 | 0,1403118 | 7,0321343 | 2,03E-12  | 7,16E-11  | DCAF5   |
| ENSGALG000000006812 | 66,925337 | 0,985329432 | 0,3466414 | 2,8425032 | 0,0044761 | 0,0182625 | TTC36   |
| ENSGALG000000001764 | 93,207252 | 0,985279854 | 0,3248167 | 3,0333416 | 0,0024186 | 0,0110206 | HCN4    |
| ENSGALG000000005030 | 1142,7214 | 0,984706358 | 0,1778942 | 5,5353473 | 3,11E-08  | 5,55E-07  | DOCK10  |
| ENSGALG000000009488 | 49,450774 | 0,98346472  | 0,3539444 | 2,7785852 | 0,0054596 | 0,0216083 | LRRN3   |
| ENSGALG000000027429 | 108,06142 | 0,983232181 | 0,3123358 | 3,1479968 | 0,0016439 | 0,0080223 | HSD17B1 |
| ENSGALG000000011203 | 97,875883 | 0,983177315 | 0,3203781 | 3,0688031 | 0,0021492 | 0,0100141 | HPSE    |
| ENSGALG000000005419 | 103,38309 | 0,983150481 | 0,3221858 | 3,0515019 | 0,002277  | 0,0104911 | ERC2    |
| ENSGALG000000015172 | 24,235396 | 0,982809248 | 0,3441667 | 2,85562   | 0,0042953 | 0,0176945 |         |
| ENSGALG000000023847 | 205,80734 | 0,981888346 | 0,2682741 | 3,6600198 | 0,0002522 | 0,0016692 |         |
| ENSGALG000000012552 | 632,63312 | 0,981819434 | 0,1820243 | 5,3938935 | 6,89E-08  | 1,15E-06  | TOM1    |
| ENSGALG000000027739 | 223,97962 | 0,981670308 | 0,2808826 | 3,4949492 | 0,0004742 | 0,0028704 | CPNE9   |
| ENSGALG000000000394 | 39,052306 | 0,981204777 | 0,3535388 | 2,7753805 | 0,0055137 | 0,0217718 | SLC6A17 |

|                    |           |             |           |           |           |           |          |
|--------------------|-----------|-------------|-----------|-----------|-----------|-----------|----------|
| ENSGALG00000005883 | 37,607236 | 0,980233834 | 0,3534383 | 2,7734226 | 0,005547  | 0,0218779 | BRICD5   |
| ENSGALG00000012715 | 380,22403 | 0,978917656 | 0,2453996 | 3,9890758 | 6,63E-05  | 0,0005244 | CAP2     |
| ENSGALG00000012709 | 399,32692 | 0,978132572 | 0,259146  | 3,774446  | 0,0001604 | 0,0011301 | ATXN1    |
| ENSGALG00000027489 | 17,903941 | 0,978014836 | 0,3301784 | 2,9620804 | 0,0030557 | 0,0133772 |          |
| ENSGALG00000026754 | 127,90019 | 0,977513049 | 0,3209323 | 3,0458545 | 0,0023202 | 0,0106577 |          |
| ENSGALG00000028301 | 585,85613 | 0,976931086 | 0,2053037 | 4,7584672 | 1,95E-06  | 2,36E-05  | TRIM47   |
| ENSGALG00000006882 | 2766,7066 | 0,976472658 | 0,130813  | 7,4646479 | 8,35E-14  | 3,47E-12  | ST8SIA2  |
| ENSGALG00000026027 | 52,610545 | 0,976263156 | 0,3534975 | 2,7617256 | 0,0057497 | 0,0224496 | CLIC3    |
| ENSGALG00000024059 | 15,053333 | 0,976199065 | 0,3125125 | 3,1237123 | 0,0017858 | 0,0085765 | PGA      |
| ENSGALG00000010797 | 412,00234 | 0,975073157 | 0,2100324 | 4,6424888 | 3,44E-06  | 3,95E-05  | SOSTDC1  |
| ENSGALG00000000902 | 273,8179  | 0,974915117 | 0,2442269 | 3,9918423 | 6,56E-05  | 0,0005187 | KDF1     |
| ENSGALG00000004591 | 574,2787  | 0,974905454 | 0,1969693 | 4,949529  | 7,44E-07  | 9,89E-06  | SERPINC1 |
| ENSGALG00000016715 | 46,103475 | 0,974213716 | 0,3521064 | 2,7668161 | 0,0056607 | 0,0221976 | MEP1A    |
| ENSGALG00000016944 | 4957,4542 | 0,973864805 | 0,3289279 | 2,9607247 | 0,0030692 | 0,0134233 | PCDH8    |
| ENSGALG00000018875 | 14,740412 | 0,973272591 | 0,3123576 | 3,1158922 | 0,0018339 | 0,0087609 | ACSM4    |
| ENSGALG00000004721 | 51,579363 | 0,972599162 | 0,3523855 | 2,7600432 | 0,0057794 | 0,0225397 | KCNJ12   |
| ENSGALG00000003886 | 1023,8773 | 0,971801068 | 0,1773944 | 5,4781962 | 4,30E-08  | 7,44E-07  | SGCD     |
| ENSGALG00000003069 | 21,65475  | 0,971652009 | 0,3390802 | 2,8655523 | 0,0041628 | 0,017227  | TNFSF4   |
| ENSGALG00000023869 | 23,260449 | 0,971412526 | 0,3437175 | 2,8261945 | 0,0047105 | 0,0190805 |          |
| ENSGALG00000019231 | 26,295329 | 0,970164482 | 0,3464496 | 2,8003049 | 0,0051054 | 0,0203963 | CD200R1  |
| ENSGALG00000023439 | 59,847743 | 0,969553596 | 0,3512997 | 2,7599043 | 0,0057818 | 0,0225428 |          |
| ENSGALG00000019325 | 54,610886 | 0,96951089  | 0,3507875 | 2,7638126 | 0,005713  | 0,0223258 |          |
| ENSGALG00000005844 | 1501,3882 | 0,969445519 | 0,1528693 | 6,3416622 | 2,27E-10  | 5,87E-09  | CASKIN1  |
| ENSGALG00000016820 | 787,30983 | 0,968970008 | 0,1783249 | 5,4337332 | 5,52E-08  | 9,36E-07  | GAS6     |
| ENSGALG00000027287 | 736,98606 | 0,968636988 | 0,1893148 | 5,11654   | 3,11E-07  | 4,50E-06  | HK3      |
| ENSGALG00000003170 | 1633,7315 | 0,967045053 | 0,1741681 | 5,552367  | 2,82E-08  | 5,10E-07  | DNAH10   |
| ENSGALG00000026870 | 2578,9703 | 0,966911139 | 0,1632907 | 5,9214111 | 3,19E-09  | 6,99E-08  | TMEM200C |
| ENSGALG00000027511 | 3914,707  | 0,966828969 | 0,1525889 | 6,3361698 | 2,36E-10  | 6,06E-09  | SP5      |
| ENSGALG00000021275 | 22,663889 | 0,966605206 | 0,3386389 | 2,8543832 | 0,004312  | 0,0177474 | LTC4S    |
| ENSGALG00000004734 | 21,747155 | 0,966247375 | 0,3385892 | 2,8537457 | 0,0043207 | 0,0177582 |          |
| ENSGALG00000015418 | 42,123895 | 0,966243505 | 0,353786  | 2,7311521 | 0,0063113 | 0,0242874 | EPHA6    |
| ENSGALG00000001209 | 151,27678 | 0,963839438 | 0,2885245 | 3,3405805 | 0,000836  | 0,0046009 | TP53INP2 |
| ENSGALG00000008932 | 24,822651 | 0,962818941 | 0,3469054 | 2,7754514 | 0,0055125 | 0,0217718 | ENTPD8   |
| ENSGALG00000012681 | 687,54966 | 0,96179459  | 0,1933738 | 4,9737578 | 6,57E-07  | 8,84E-06  | MBOAT1   |
| ENSGALG00000026914 | 303,14643 | 0,960831377 | 0,2341299 | 4,1038388 | 4,06E-05  | 0,0003453 | DOK3     |
| ENSGALG00000016597 | 546,5809  | 0,96044418  | 0,2115615 | 4,5397871 | 5,63E-06  | 6,12E-05  | STMN4    |
| ENSGALG00000006911 | 92,463176 | 0,960163411 | 0,3331134 | 2,8823917 | 0,0039467 | 0,0165082 | TMC5     |
| ENSGALG00000028041 | 172,71276 | 0,96010795  | 0,292817  | 3,2788668 | 0,0010422 | 0,0055242 | DKK2     |
| ENSGALG00000008317 | 155,9685  | 0,958791686 | 0,2982524 | 3,2146994 | 0,0013058 | 0,0066662 | SDSL     |
| ENSGALG00000006192 | 588,22456 | 0,958606154 | 0,1986953 | 4,824504  | 1,40E-06  | 1,77E-05  | USH1C    |
| ENSGALG00000012285 | 88,550664 | 0,958415036 | 0,3255253 | 2,9442104 | 0,0032378 | 0,0140066 | BAIAP2L2 |
| ENSGALG00000017274 | 44,802442 | 0,957455073 | 0,3539461 | 2,7050872 | 0,0068286 | 0,0258936 | CD9      |
| ENSGALG00000009896 | 1725,9341 | 0,956710434 | 0,138947  | 6,8854343 | 5,76E-12  | 1,88E-10  | TRERF1   |
| ENSGALG00000008936 | 346,61065 | 0,956545148 | 0,2393518 | 3,9963977 | 6,43E-05  | 0,0005109 | ENTPD8L  |
| ENSGALG00000012577 | 1716,8746 | 0,956309243 | 0,1378913 | 6,9352415 | 4,06E-12  | 1,35E-10  | FRMD3    |
| ENSGALG00000006375 | 24,972242 | 0,956253302 | 0,3445218 | 2,7755957 | 0,0055101 | 0,0217718 | TM4SF19  |
| ENSGALG00000012271 | 67,173186 | 0,955959348 | 0,3478063 | 2,7485396 | 0,0059861 | 0,0232197 | MTTP     |
| ENSGALG00000023271 | 71,780111 | 0,955084764 | 0,3439036 | 2,7771873 | 0,0054832 | 0,0216826 |          |
| ENSGALG00000016945 | 3627,6803 | 0,953551228 | 0,1270066 | 7,5078871 | 6,01E-14  | 2,53E-12  | LECT1    |
| ENSGALG00000003209 | 25,968303 | 0,953438931 | 0,3318207 | 2,8733556 | 0,0040614 | 0,0169048 | NODAL    |
| ENSGALG00000014843 | 607,09399 | 0,953307805 | 0,2111335 | 4,5151905 | 6,33E-06  | 6,80E-05  | TPD52L1  |
| ENSGALG00000029150 | 2513,115  | 0,953288378 | 0,1486082 | 6,414778  | 1,41E-10  | 3,76E-09  | AK1      |
| ENSGALG00000005118 | 32,326575 | 0,952825585 | 0,3518222 | 2,7082585 | 0,0067637 | 0,0257069 |          |
| ENSGALG00000000295 | 158,36113 | 0,951838119 | 0,2874721 | 3,3110626 | 0,0009294 | 0,0050415 | IGFN1    |
| ENSGALG00000002008 | 770,02151 | 0,951550674 | 0,2636914 | 3,6085762 | 0,0003079 | 0,0019866 | RNF157   |
| ENSGALG00000009216 | 17,250683 | 0,951287914 | 0,3202238 | 2,970697  | 0,0029712 | 0,0130664 |          |
| ENSGALG00000005472 | 26,534994 | 0,951255745 | 0,3483401 | 2,7308243 | 0,0063176 | 0,024288  | NAT      |
| ENSGALG00000017926 | 117,34516 | 0,950771836 | 0,3049521 | 3,1177741 | 0,0018222 | 0,0087174 |          |
| ENSGALG00000009123 | 138,33508 | 0,94996493  | 0,2943779 | 3,227025  | 0,0012508 | 0,006434  |          |
| ENSGALG00000017068 | 94,861308 | 0,947287623 | 0,3314816 | 2,8577385 | 0,0042667 | 0,0175875 | KL       |
| ENSGALG00000021696 | 69,405082 | 0,947251279 | 0,3378068 | 2,8041212 | 0,0050454 | 0,0202098 | TRIM50   |
| ENSGALG00000026793 | 20,910942 | 0,946537074 | 0,3217404 | 2,9419277 | 0,0032618 | 0,0140891 | CYP2C8   |



|                    |           |             |           |           |           |           |          |
|--------------------|-----------|-------------|-----------|-----------|-----------|-----------|----------|
| ENSGALG00000011046 | 918,66681 | 0,946061534 | 0,2245408 | 4,2133163 | 2,52E-05  | 0,0002287 | SNX10    |
| ENSGALG00000004792 | 282,6657  | 0,945718297 | 0,2609466 | 3,6241839 | 0,0002899 | 0,0018856 | PLCB2    |
| ENSGALG00000001091 | 62,437953 | 0,945610586 | 0,3444618 | 2,7451826 | 0,0060477 | 0,0234186 | C1orf116 |
| ENSGALG00000005857 | 90,998254 | 0,944585535 | 0,322613  | 2,9279211 | 0,0034124 | 0,0146283 | ALOX5    |
| ENSGALG00000006988 | 545,9632  | 0,944077449 | 0,2380928 | 3,9651665 | 7,33E-05  | 0,0005736 | RNF213   |
| ENSGALG00000009002 | 180,8252  | 0,943061124 | 0,2745333 | 3,4351427 | 0,0005922 | 0,0034533 | C7ORF58  |
| ENSGALG00000003370 | 6860,8975 | 0,941055859 | 0,1158875 | 8,120424  | 4,65E-16  | 2,56E-14  | KIAA1191 |
| ENSGALG00000015183 | 541,00251 | 0,940741895 | 0,2469295 | 3,8097593 | 0,0001391 | 0,0009994 |          |
| ENSGALG00000010977 | 629,76264 | 0,94045823  | 0,1853813 | 5,0731011 | 3,91E-07  | 5,55E-06  | FAM221A  |
| ENSGALG00000017169 | 2527,4044 | 0,94013642  | 0,1550564 | 6,0631902 | 1,33E-09  | 3,11E-08  | ELMOD1   |
| ENSGALG00000006351 | 260,93159 | 0,940035694 | 0,256606  | 3,6633421 | 0,0002489 | 0,0016526 | FAS      |
| ENSGALG00000016699 | 24,25844  | 0,939513809 | 0,3453851 | 2,7201919 | 0,0065244 | 0,0249662 | OPN5L2   |
| ENSGALG00000007415 | 599,16556 | 0,938743099 | 0,2370594 | 3,9599488 | 7,50E-05  | 0,0005829 | SH3RF2   |
| ENSGALG00000002678 | 150,0779  | 0,938682309 | 0,293615  | 3,1969839 | 0,0013887 | 0,007008  | CSPG4    |
| ENSGALG00000003832 | 1422,7636 | 0,938218604 | 0,1475404 | 6,3590641 | 2,03E-10  | 5,31E-09  | TEX264   |
| ENSGALG00000009725 | 763,67798 | 0,938023358 | 0,224257  | 4,182805  | 2,88E-05  | 0,0002563 | SCG5     |
| ENSGALG00000015967 | 204,24999 | 0,936813576 | 0,2634911 | 3,5553898 | 0,0003774 | 0,0023603 | LRRTM1   |
| ENSGALG00000003435 | 45,697878 | 0,936462652 | 0,3537379 | 2,6473351 | 0,0081129 | 0,0297327 | PGC      |
| ENSGALG00000002473 | 480,3177  | 0,93617222  | 0,2026166 | 4,6204127 | 3,83E-06  | 4,35E-05  | GPR157   |
| ENSGALG00000015926 | 1110,0554 | 0,934566237 | 0,1598776 | 5,84551   | 5,05E-09  | 1,06E-07  | RUNX1T1  |
| ENSGALG00000019312 | 16,25864  | 0,934023396 | 0,3177972 | 2,939055  | 0,0032921 | 0,0141844 |          |
| ENSGALG00000001398 | 801,87151 | 0,933503925 | 0,1756569 | 5,3143584 | 1,07E-07  | 1,71E-06  |          |
| ENSGALG00000010337 | 96,826556 | 0,93241733  | 0,319691  | 2,9166205 | 0,0035385 | 0,0151022 | GPR149   |
| ENSGALG00000028292 | 453,15086 | 0,931661788 | 0,2502644 | 3,7227094 | 0,0001971 | 0,0013471 | FAM19A4  |
| ENSGALG00000008735 | 158,65028 | 0,931477748 | 0,2951381 | 3,1560747 | 0,0015991 | 0,0078456 | BFSP1    |
| ENSGALG00000010139 | 381,67431 | 0,931031468 | 0,2175137 | 4,2803349 | 1,87E-05  | 0,0001763 | SSTR1    |
| ENSGALG00000002843 | 586,86661 | 0,930974563 | 0,1932115 | 4,8184228 | 1,45E-06  | 1,82E-05  | RILP     |
| ENSGALG00000001694 | 115,671   | 0,929649369 | 0,3250641 | 2,8598955 | 0,0042378 | 0,0175001 | FER1L4   |
| ENSGALG00000001287 | 117,66472 | 0,929543301 | 0,3091097 | 3,0071632 | 0,002637  | 0,0118295 | ABI3     |
| ENSGALG00000023626 | 1834,269  | 0,929476271 | 0,1654852 | 5,6166736 | 1,95E-08  | 3,65E-07  | NTN1     |
| ENSGALG00000002083 | 14,444586 | 0,928533788 | 0,3085021 | 3,0098139 | 0,0026141 | 0,0117383 | PLIN3    |
| ENSGALG00000027053 | 71,270094 | 0,927920334 | 0,3515108 | 2,6398059 | 0,0082954 | 0,0302791 | C18orf42 |
| ENSGALG00000028091 | 182,30387 | 0,927849672 | 0,2899177 | 3,2003896 | 0,0013724 | 0,0069433 | MYF5     |
| ENSGALG00000025801 | 28,789593 | 0,927018359 | 0,349612  | 2,6515632 | 0,008012  | 0,0294645 |          |
| ENSGALG00000000866 | 124,56244 | 0,926965653 | 0,3251101 | 2,8512364 | 0,004355  | 0,0178646 | SELENBP1 |
| ENSGALG00000006388 | 73,461217 | 0,926517942 | 0,3489684 | 2,6550197 | 0,0079304 | 0,029237  | IL16     |
| ENSGALG00000000919 | 14,595204 | 0,925422799 | 0,3081645 | 3,0030152 | 0,0026732 | 0,0119683 | PIGR     |
| ENSGALG00000023517 | 259,64579 | 0,925400404 | 0,2568731 | 3,602558  | 0,0003151 | 0,0020246 | AGPAT2   |
| ENSGALG00000005626 | 609,64517 | 0,92496767  | 0,2159097 | 4,2840488 | 1,84E-05  | 0,0001735 | TPST2    |
| ENSGALG00000001035 | 102,60165 | 0,924878686 | 0,3465453 | 2,6688536 | 0,0076111 | 0,028305  | NR1D1    |
| ENSGALG00000020233 | 23,832939 | 0,924086016 | 0,3386279 | 2,7289127 | 0,0063544 | 0,0243978 |          |
| ENSGALG00000000311 | 558,40847 | 0,92295118  | 0,2153587 | 4,2856468 | 1,82E-05  | 0,0001725 | DOCK5    |
| ENSGALG00000014988 | 88,836245 | 0,920904288 | 0,3383615 | 2,7216578 | 0,0064955 | 0,0248884 | POPDC2   |
| ENSGALG00000015207 | 1291,1294 | 0,92039826  | 0,1472006 | 6,2526786 | 4,03E-10  | 1,00E-08  | F5       |
| ENSGALG00000010417 | 18,919028 | 0,920255863 | 0,3320234 | 2,77166   | 0,0055771 | 0,0219585 | VDHAP    |
| ENSGALG00000010288 | 20,644022 | 0,918819724 | 0,3351049 | 2,7418866 | 0,0061087 | 0,0236079 |          |
| ENSGALG00000023936 | 805,04939 | 0,918539777 | 0,2012641 | 4,5638532 | 5,02E-06  | 5,56E-05  |          |
| ENSGALG00000009509 | 42,581938 | 0,91836029  | 0,3539579 | 2,5945464 | 0,0094716 | 0,0336435 | CALCR    |
| ENSGALG00000011709 | 513,36272 | 0,918333355 | 0,2317844 | 3,9620158 | 7,43E-05  | 0,0005792 | TMEM108  |
| ENSGALG00000027622 | 398,87687 | 0,916634803 | 0,2658647 | 3,4477494 | 0,0005653 | 0,0033245 | ADAM11   |
| ENSGALG00000015795 | 539,93954 | 0,91628777  | 0,2153216 | 4,2554383 | 2,09E-05  | 0,0001946 | ADAMTS5  |
| ENSGALG00000005120 | 2531,22   | 0,916224882 | 0,1549653 | 5,9124511 | 3,37E-09  | 7,37E-08  | FBLN2    |
| ENSGALG00000010736 | 93,908737 | 0,914854903 | 0,3255588 | 2,8101064 | 0,0049525 | 0,0199374 | DIO1     |
| ENSGALG00000013071 | 1399,4771 | 0,914850391 | 0,17423   | 5,2508198 | 1,51E-07  | 2,35E-06  | CALD1    |
| ENSGALG00000010382 | 346,13588 | 0,914779385 | 0,2280121 | 4,0119779 | 6,02E-05  | 0,0004822 | LRRC73   |
| ENSGALG00000004309 | 938,33548 | 0,913060877 | 0,1855348 | 4,9212369 | 8,60E-07  | 1,13E-05  | GDAP1L1  |
| ENSGALG00000028622 | 281,67527 | 0,912974481 | 0,2559896 | 3,566452  | 0,0003618 | 0,0022808 | PEAR1    |
| ENSGALG00000017214 | 131,47371 | 0,912890352 | 0,3103783 | 2,9412185 | 0,0032692 | 0,0141048 | HEPHL1   |
| ENSGALG00000016013 | 42,116835 | 0,912662466 | 0,3534877 | 2,5818789 | 0,0098264 | 0,0347137 | HTR7L    |
| ENSGALG00000026687 | 69,587609 | 0,912634606 | 0,347276  | 2,6279803 | 0,0085893 | 0,0311435 | PLCD4    |
| ENSGALG00000005331 | 677,48087 | 0,912514017 | 0,1798939 | 5,0725131 | 3,93E-07  | 5,56E-06  | GJC2     |
| ENSGALG00000003529 | 116,76012 | 0,912498344 | 0,3196723 | 2,8544806 | 0,0043107 | 0,0177474 | SYNC     |

|                    |           |             |           |           |           |           |          |
|--------------------|-----------|-------------|-----------|-----------|-----------|-----------|----------|
| ENSGALG00000027462 | 1468,6722 | 0,912376278 | 0,1432394 | 6,369589  | 1,90E-10  | 4,98E-09  | LEPREL4  |
| ENSGALG00000015789 | 559,92994 | 0,912066241 | 0,2123869 | 4,2943618 | 1,75E-05  | 0,000167  | CNR1     |
| ENSGALG00000026563 | 13,690632 | 0,912028647 | 0,3072132 | 2,9687161 | 0,0029905 | 0,0131255 | HAPLN4   |
| ENSGALG00000010551 | 919,31695 | 0,911984879 | 0,1832286 | 4,9773072 | 6,45E-07  | 8,70E-06  | CDC42EP3 |
| ENSGALG00000012298 | 550,04797 | 0,911513817 | 0,2224948 | 4,0967868 | 4,19E-05  | 0,0003536 | SLC39A8  |
| ENSGALG00000003588 | 1398,6038 | 0,911216657 | 0,1584852 | 5,7495378 | 8,95E-09  | 1,78E-07  |          |
| ENSGALG00000005814 | 212,00295 | 0,910795359 | 0,271855  | 3,3502982 | 0,0008072 | 0,0044752 |          |
| ENSGALG00000002581 | 512,90179 | 0,910753526 | 0,1951976 | 4,6658018 | 3,07E-06  | 3,56E-05  | HTATIP2  |
| ENSGALG00000004676 | 1678,5831 | 0,910530695 | 0,1433097 | 6,3535879 | 2,10E-10  | 5,48E-09  | BTG3     |
| ENSGALG00000008727 | 92,320134 | 0,910292988 | 0,3286188 | 2,7700573 | 0,0056046 | 0,022035  |          |
| ENSGALG00000023195 | 260,80986 | 0,909179266 | 0,2471713 | 3,6783362 | 0,0002348 | 0,0015683 | DLX6     |
| ENSGALG00000027013 | 1552,1008 | 0,908413942 | 0,3505249 | 2,5915816 | 0,0095536 | 0,0338377 | HOX1     |
| ENSGALG00000015725 | 901,98347 | 0,907979483 | 0,1701411 | 5,3366278 | 9,47E-08  | 1,53E-06  | FGFRL1   |
| ENSGALG00000007114 | 305,81852 | 0,907573399 | 0,2767971 | 3,2788398 | 0,0010423 | 0,0055242 | APOA1    |
| ENSGALG00000010635 | 38,448493 | 0,906970906 | 0,3515336 | 2,5800407 | 0,0098789 | 0,0348087 |          |
| ENSGALG00000011213 | 25,560047 | 0,906880966 | 0,3462592 | 2,619081  | 0,0088167 | 0,0317985 | DEGS2    |
| ENSGALG00000019635 | 32,562895 | 0,90677452  | 0,3521651 | 2,5748562 | 0,0100282 | 0,0352345 | PP2D1    |
| ENSGALG00000006202 | 116,81237 | 0,906421176 | 0,31598   | 2,8686028 | 0,0041229 | 0,0171086 | SCNN1B   |
| ENSGALG00000003018 | 309,19026 | 0,906093174 | 0,2488521 | 3,6410907 | 0,0002715 | 0,0017771 | SCARB1   |
| ENSGALG00000016076 | 120,93641 | 0,906052944 | 0,3046837 | 2,9737494 | 0,0029419 | 0,0129706 | DPYS     |
| ENSGALG00000015495 | 24,536119 | 0,904690337 | 0,3465615 | 2,6104756 | 0,0090416 | 0,0324294 | POU1F1   |
| ENSGALG00000013886 | 841,1366  | 0,904236576 | 0,1804703 | 5,0104453 | 5,43E-07  | 7,51E-06  | LDLRAD4  |
| ENSGALG00000005795 | 32,624744 | 0,904049889 | 0,343537  | 2,6315941 | 0,0084985 | 0,0308718 | CYP2H1   |
| ENSGALG00000021442 | 473,2158  | 0,903637173 | 0,225822  | 4,0015457 | 6,29E-05  | 0,000501  | RLTPR    |
| ENSGALG00000005014 | 159,55971 | 0,903243848 | 0,2894313 | 3,1207539 | 0,0018039 | 0,0086448 | AIPL1    |
| ENSGALG00000002963 | 189,40667 | 0,902926335 | 0,2699116 | 3,3452673 | 0,000822  | 0,0045354 | PID1     |
| ENSGALG00000000836 | 482,38155 | 0,902335572 | 0,2085245 | 4,3272398 | 1,51E-05  | 0,0001475 | RFX5     |
| ENSGALG00000011124 | 436,07123 | 0,902068067 | 0,2097494 | 4,3006934 | 1,70E-05  | 0,000163  | ARHGAP24 |
| ENSGALG00000010827 | 4357,4834 | 0,901311467 | 0,1146698 | 7,8600622 | 3,84E-15  | 1,84E-13  | ITPK1    |
| ENSGALG00000006756 | 144,39    | 0,900987054 | 0,2996417 | 3,0068817 | 0,0026394 | 0,0118366 | BPI      |
| ENSGALG00000006740 | 150,08447 | 0,900492229 | 0,3014742 | 2,9869628 | 0,0028176 | 0,0125162 |          |
| ENSGALG00000008461 | 387,65672 | 0,900341356 | 0,2481083 | 3,6288245 | 0,0002847 | 0,0018574 | HGF      |
| ENSGALG00000016761 | 58,000294 | 0,90015721  | 0,3467952 | 2,5956447 | 0,0094414 | 0,0335537 | LYG2     |
| ENSGALG00000010119 | 1290,7566 | 0,900097678 | 0,1879287 | 4,78957   | 1,67E-06  | 2,06E-05  | CDKL2    |
| ENSGALG00000020905 | 199,73795 | 0,899806675 | 0,2823411 | 3,1869491 | 0,0014378 | 0,007205  | KSR2     |
| ENSGALG00000009737 | 97,351691 | 0,899099989 | 0,342334  | 2,6263823 | 0,0086298 | 0,0312485 | TAC1     |
| ENSGALG00000006793 | 399,96964 | 0,898163749 | 0,2122528 | 4,2315762 | 2,32E-05  | 0,0002129 | NTRK3    |
| ENSGALG00000008632 | 774,98804 | 0,897411708 | 0,1727746 | 5,1941169 | 2,06E-07  | 3,11E-06  | ACSS1    |
| ENSGALG00000001896 | 633,5555  | 0,897398544 | 0,1829807 | 4,9043349 | 9,37E-07  | 1,23E-05  | NTNG1    |
| ENSGALG00000006083 | 883,4583  | 0,896818662 | 0,1847643 | 4,8538537 | 1,21E-06  | 1,55E-05  |          |
| ENSGALG00000023772 | 19,974194 | 0,896459603 | 0,3370772 | 2,6595087 | 0,0078255 | 0,02896   | HSPB7    |
| ENSGALG00000005853 | 55,709692 | 0,89635133  | 0,3538655 | 2,5330285 | 0,0113082 | 0,0387543 | HTR2C    |
| ENSGALG00000007052 | 507,96535 | 0,895651499 | 0,203478  | 4,4017107 | 1,07E-05  | 0,0001099 | PXK      |
| ENSGALG00000015977 | 788,48732 | 0,89563673  | 0,2070525 | 4,3256514 | 1,52E-05  | 0,0001481 | SMOX     |
| ENSGALG00000005349 | 125,03741 | 0,895405672 | 0,3020632 | 2,9642993 | 0,0030337 | 0,0132897 | MSLN     |
| ENSGALG00000005085 | 110,02771 | 0,895178522 | 0,3179722 | 2,8152725 | 0,0048736 | 0,0196662 | DRD4     |
| ENSGALG00000008262 | 171,78981 | 0,894529697 | 0,2811864 | 3,1812692 | 0,0014663 | 0,0072994 | RASGRF1  |
| ENSGALG00000000374 | 1105,8431 | 0,894239416 | 0,1877046 | 4,7640791 | 1,90E-06  | 2,30E-05  | RNPEP    |
| ENSGALG00000017204 | 419,66256 | 0,891856915 | 0,2224702 | 4,0088824 | 6,10E-05  | 0,000488  | SESN3    |
| ENSGALG00000002854 | 440,26532 | 0,890941536 | 0,2420509 | 3,6808025 | 0,0002325 | 0,0015558 | PDZD2    |
| ENSGALG00000008599 | 20,776579 | 0,889603293 | 0,3339725 | 2,6637025 | 0,0077286 | 0,0286811 |          |
| ENSGALG00000005203 | 773,68467 | 0,889220424 | 0,2133641 | 4,1676197 | 3,08E-05  | 0,0002718 | OLFM3    |
| ENSGALG00000027603 | 933,53527 | 0,889190298 | 0,1666499 | 5,335677  | 9,52E-08  | 1,54E-06  | ZHX3     |
| ENSGALG00000003932 | 494,66101 | 0,888085177 | 0,2291723 | 3,8751853 | 0,0001065 | 0,000794  | SDC4     |
| ENSGALG00000007388 | 193,87974 | 0,887520344 | 0,3042223 | 2,9173416 | 0,0035303 | 0,0150721 | SRRM4    |
| ENSGALG00000013265 | 26,768688 | 0,887507398 | 0,3491977 | 2,5415617 | 0,0110358 | 0,0380484 | GYS2     |
| ENSGALG00000001917 | 36,330226 | 0,88709327  | 0,3537861 | 2,5074281 | 0,0121613 | 0,0410137 | SSC4D    |
| ENSGALG00000021666 | 75,893072 | 0,886771767 | 0,3536689 | 2,5073499 | 0,012164  | 0,0410137 | TMEM240  |
| ENSGALG00000010269 | 1110,1934 | 0,886301871 | 0,1651233 | 5,3675161 | 7,98E-08  | 1,31E-06  | KCNAB1   |
| ENSGALG00000004093 | 635,62125 | 0,885654514 | 0,2097536 | 4,2223558 | 2,42E-05  | 0,0002211 | TBX22    |
| ENSGALG00000009256 | 32,540437 | 0,884987978 | 0,3436981 | 2,5748992 | 0,0100269 | 0,0352345 | LEFTY2   |
| ENSGALG00000004729 | 91,741024 | 0,88490464  | 0,3219745 | 2,7483686 | 0,0059893 | 0,0232252 | SLC7A10  |

|                    |           |             |           |           |           |           |              |
|--------------------|-----------|-------------|-----------|-----------|-----------|-----------|--------------|
| ENSGALG00000008722 | 81,303501 | 0,884773994 | 0,3362693 | 2,6311471 | 0,0085097 | 0,030896  | MCOLN2       |
| ENSGALG00000015788 | 630,45937 | 0,884593035 | 0,2015792 | 4,3883151 | 1,14E-05  | 0,000116  | CHMP4C       |
| ENSGALG00000004970 | 368,25658 | 0,884420332 | 0,2518256 | 3,5120356 | 0,0004447 | 0,0027174 | SVOP         |
| ENSGALG00000026152 | 376,28373 | 0,884418189 | 0,2320545 | 3,8112524 | 0,0001383 | 0,0009939 | GBP          |
| ENSGALG00000002252 | 31,22735  | 0,883701655 | 0,3473707 | 2,5439732 | 0,0109599 | 0,0378538 |              |
| ENSGALG00000010862 | 27,986731 | 0,883307692 | 0,3482432 | 2,5364677 | 0,0111977 | 0,0384768 | FERD3L       |
| ENSGALG00000004854 | 90,659457 | 0,882798305 | 0,3265019 | 2,7038079 | 0,006855  | 0,0259757 |              |
| ENSGALG00000025733 | 660,61374 | 0,882587352 | 0,1955092 | 4,5143008 | 6,35E-06  | 6,83E-05  |              |
| ENSGALG00000006008 | 1270,6534 | 0,882382705 | 0,1743852 | 5,0599632 | 4,19E-07  | 5,90E-06  | HOMER2       |
| ENSGALG00000027027 | 1969,0809 | 0,882215122 | 0,163127  | 5,4081483 | 6,37E-08  | 1,07E-06  | FBXL7        |
| ENSGALG00000011235 | 63,312192 | 0,882157118 | 0,3457444 | 2,5514721 | 0,0107269 | 0,0372093 | GALNT15      |
| ENSGALG00000003270 | 387,81088 | 0,881994372 | 0,2135989 | 4,1292087 | 3,64E-05  | 0,0003135 | DRD1         |
| ENSGALG00000020160 | 119,73819 | 0,881263086 | 0,3087394 | 2,8543913 | 0,0043119 | 0,0177474 | ADH6         |
| ENSGALG00000011234 | 31,35804  | 0,880790396 | 0,3529516 | 2,4954988 | 0,012578  | 0,0422005 | INHA         |
| ENSGALG00000001519 | 27,987195 | 0,879960975 | 0,3507261 | 2,5089692 | 0,0121084 | 0,0408565 | NEU2         |
| ENSGALG00000009580 | 19,504731 | 0,879798414 | 0,32149   | 2,7366276 | 0,0062073 | 0,0239207 | IQCJ         |
| ENSGALG00000016986 | 175,40028 | 0,879609126 | 0,2982944 | 2,9487952 | 0,0031902 | 0,0138545 | LCP1         |
| ENSGALG00000008349 | 209,56657 | 0,879571782 | 0,2609378 | 3,3708107 | 0,0007495 | 0,0042079 | LMCD1        |
| ENSGALG00000009601 | 8743,3872 | 0,878730197 | 0,1376458 | 6,3839954 | 1,73E-10  | 4,59E-09  | NELL2        |
| ENSGALG00000008121 | 42,835354 | 0,876566467 | 0,3539561 | 2,4764833 | 0,0132684 | 0,0439535 | CYP17A1      |
| ENSGALG00000008364 | 36,778976 | 0,876075442 | 0,3534635 | 2,4785458 | 0,0131919 | 0,0437898 |              |
| ENSGALG00000023415 | 29,787572 | 0,875042862 | 0,3509632 | 2,4932611 | 0,0126576 | 0,0424047 | HMX3         |
| ENSGALG00000027920 | 386,75217 | 0,874011674 | 0,2284444 | 3,8259279 | 0,0001303 | 0,0009425 | CPLX2        |
| ENSGALG00000026059 | 270,41633 | 0,873870501 | 0,2397099 | 3,6455337 | 0,0002668 | 0,0017508 | TWIST1       |
| ENSGALG00000004788 | 68,83418  | 0,873507388 | 0,3452821 | 2,5298369 | 0,0114116 | 0,0389981 | TNFAIP8L3    |
| ENSGALG00000011219 | 83,302927 | 0,873388378 | 0,3403042 | 2,5664933 | 0,0102733 | 0,0359195 | GCGR         |
| ENSGALG00000016017 | 590,76905 | 0,873175292 | 0,2154495 | 4,0528075 | 5,06E-05  | 0,000416  | SLC4A11      |
| ENSGALG00000005974 | 256,91419 | 0,872920311 | 0,2521004 | 3,4625904 | 0,000535  | 0,0031739 | COL6A1       |
| ENSGALG00000012422 | 27,355404 | 0,872315124 | 0,3483618 | 2,5040496 | 0,0122781 | 0,0413266 | SH3BP1       |
| ENSGALG00000026939 | 41,153772 | 0,872255445 | 0,3538073 | 2,4653407 | 0,0136883 | 0,044964  |              |
| ENSGALG00000009640 | 27,779879 | 0,872186333 | 0,3505999 | 2,487697  | 0,0128573 | 0,0429155 | CHRM5        |
| ENSGALG00000001840 | 243,72168 | 0,872138912 | 0,2890387 | 3,0173773 | 0,0025497 | 0,0114911 | TEK          |
| ENSGALG00000001129 | 1785,0406 | 0,871868135 | 0,1530444 | 5,69683   | 1,22E-08  | 2,38E-07  | KIRREL3      |
| ENSGALG00000028928 | 43,951223 | 0,871728708 | 0,3534532 | 2,4663203 | 0,0136509 | 0,0448931 | LCAT         |
| ENSGALG00000001532 | 54,980298 | 0,870029294 | 0,3496522 | 2,4882708 | 0,0128366 | 0,0428667 | WNT2B        |
| ENSGALG00000009867 | 212,19054 | 0,869748432 | 0,2675059 | 3,2513241 | 0,0011487 | 0,0059997 | WIF1         |
| ENSGALG00000027364 | 6291,5882 | 0,867638443 | 0,1162491 | 7,4636145 | 8,42E-14  | 3,48E-12  | HEY1         |
| ENSGALG00000026246 | 29,222799 | 0,867468639 | 0,3517182 | 2,4663739 | 0,0136489 | 0,0448931 | GIF          |
| ENSGALG00000020876 | 244,82737 | 0,867421463 | 0,2948139 | 2,942268  | 0,0032582 | 0,0140826 | AOX2         |
| ENSGALG00000011624 | 479,03518 | 0,867273579 | 0,2018671 | 4,2962601 | 1,74E-05  | 0,000166  | PNLDC1       |
| ENSGALG00000016384 | 268,59226 | 0,867172927 | 0,2685681 | 3,2288758 | 0,0012428 | 0,0064011 | MYT1L        |
| ENSGALG00000013515 | 39,808741 | 0,866546513 | 0,3539601 | 2,4481471 | 0,0143593 | 0,0467149 | RP11-287D1.3 |
| ENSGALG00000000225 | 112,7664  | 0,866321273 | 0,3372745 | 2,5685943 | 0,0102112 | 0,0357668 | MGAT4C       |
| ENSGALG00000011354 | 21,346176 | 0,866050474 | 0,3402355 | 2,5454444 | 0,0109139 | 0,0377138 | CRYBA2       |
| ENSGALG00000027965 | 101,43615 | 0,865747962 | 0,3205874 | 2,700505  | 0,0069234 | 0,0261695 | OPRL1        |
| ENSGALG00000026172 | 493,17496 | 0,865691508 | 0,2111797 | 4,0993117 | 4,14E-05  | 0,0003508 | CYBA         |
| ENSGALG00000016115 | 186,82276 | 0,864642259 | 0,2830702 | 3,0545156 | 0,0022542 | 0,0103983 | SAMD12       |
| ENSGALG00000027380 | 43,976414 | 0,862762922 | 0,3539532 | 2,4375054 | 0,014789  | 0,0478271 |              |
| ENSGALG00000002206 | 95,268458 | 0,862737257 | 0,3285875 | 2,6255938 | 0,0086498 | 0,031296  | SNX22        |
| ENSGALG00000019804 | 21,501251 | 0,862231301 | 0,3371774 | 2,5572037 | 0,0105517 | 0,0367422 |              |
| ENSGALG00000003895 | 788,02112 | 0,861640305 | 0,2589823 | 3,3270233 | 0,0008778 | 0,0047996 | PRDM12       |
| ENSGALG00000012072 | 201,72423 | 0,861021311 | 0,2753299 | 3,1272347 | 0,0017646 | 0,0084984 | PARP14       |
| ENSGALG00000007838 | 40,646821 | 0,860354034 | 0,3539557 | 2,4306829 | 0,0150704 | 0,0485568 | NLRC3        |
| ENSGALG00000000953 | 1344,7125 | 0,860062109 | 0,1616375 | 5,3209304 | 1,03E-07  | 1,66E-06  | TEAD3        |
| ENSGALG00000009902 | 340,49684 | 0,859561208 | 0,2490936 | 3,4507553 | 0,000559  | 0,0032934 | CFAP57       |
| ENSGALG00000005655 | 299,93592 | 0,858231064 | 0,2557112 | 3,3562518 | 0,0007901 | 0,0044067 | TSPEAR       |
| ENSGALG00000017072 | 1099,8408 | 0,857400203 | 0,1810022 | 4,7369608 | 2,17E-06  | 2,59E-05  | N4BP2L1      |
| ENSGALG00000025919 | 2494,4885 | 0,857090747 | 0,142817  | 6,0013216 | 1,96E-09  | 4,45E-08  | BAMBI        |
| ENSGALG00000016473 | 44,778577 | 0,856849135 | 0,3459792 | 2,4765913 | 0,0132644 | 0,0439509 | OSR1         |
| ENSGALG00000017228 | 49,296654 | 0,856739492 | 0,3532728 | 2,4251498 | 0,0153021 | 0,0491478 | MTNR1B       |
| ENSGALG00000016755 | 172,26247 | 0,856689481 | 0,2873424 | 2,9814236 | 0,0028691 | 0,0126954 | KIAA1211L    |
| ENSGALG00000007376 | 87,397516 | 0,856687427 | 0,3445883 | 2,4861189 | 0,0129145 | 0,0430009 | CCDC60       |

|                    |           |             |           |           |           |           |            |
|--------------------|-----------|-------------|-----------|-----------|-----------|-----------|------------|
| ENSGALG00000015768 | 2710,7019 | 0,855142896 | 0,1297486 | 6,5907703 | 4,38E-11  | 1,25E-09  | ANKRD6     |
| ENSGALG00000026896 | 77,09018  | 0,854217305 | 0,3380109 | 2,527189  | 0,011498  | 0,0392048 |            |
| ENSGALG00000012515 | 43,853432 | 0,854026842 | 0,3512742 | 2,4312255 | 0,0150478 | 0,0485029 | TPPP       |
| ENSGALG00000010664 | 712,1771  | 0,852579615 | 0,2288179 | 3,7260174 | 0,0001945 | 0,0013328 | KIF26B     |
| ENSGALG00000001189 | 452,19238 | 0,851541498 | 0,2063764 | 4,126158  | 3,69E-05  | 0,0003169 | NCF1       |
| ENSGALG00000009536 | 446,62772 | 0,851130737 | 0,2275785 | 3,7399437 | 0,0001841 | 0,0012727 |            |
| ENSGALG00000003612 | 268,62308 | 0,850682606 | 0,2669792 | 3,1863255 | 0,0014409 | 0,0072179 | RNLS       |
| ENSGALG00000023172 | 1255,7616 | 0,849498162 | 0,1537527 | 5,5250928 | 3,29E-08  | 5,85E-07  |            |
| ENSGALG00000004511 | 28,137324 | 0,848004478 | 0,350316  | 2,4206844 | 0,0154913 | 0,0496386 | MTTPL      |
| ENSGALG00000026671 | 2116,5692 | 0,847898773 | 0,1425868 | 5,9465465 | 2,74E-09  | 6,10E-08  |            |
| ENSGALG00000002742 | 2787,3387 | 0,847416181 | 0,1449021 | 5,8481963 | 4,97E-09  | 1,04E-07  | TMEM132B   |
| ENSGALG00000015670 | 217,38931 | 0,846232332 | 0,2802832 | 3,0192043 | 0,0025344 | 0,0114409 | HNF4G      |
| ENSGALG00000005791 | 520,60885 | 0,84592391  | 0,2039846 | 4,146998  | 3,37E-05  | 0,0002934 | JPH3       |
| ENSGALG00000009603 | 307,91481 | 0,844955114 | 0,2387657 | 3,5388467 | 0,0004019 | 0,0024962 |            |
| ENSGALG00000006379 | 1670,5263 | 0,844378171 | 0,1827468 | 4,6204804 | 3,83E-06  | 4,35E-05  | SHH        |
| ENSGALG00000005895 | 481,78824 | 0,844174027 | 0,2049844 | 4,1182354 | 3,82E-05  | 0,0003271 | FYTTD1L    |
| ENSGALG00000026103 | 166,74522 | 0,842618716 | 0,3162093 | 2,6647499 | 0,0077046 | 0,0286293 | CACNG3     |
| ENSGALG00000016677 | 26,013707 | 0,842209203 | 0,3459083 | 2,4347759 | 0,014901  | 0,0481322 | IL17F      |
| ENSGALG00000003952 | 60,952026 | 0,841003956 | 0,3435108 | 2,4482605 | 0,0143548 | 0,0467114 | RBPJL      |
| ENSGALG00000007043 | 22,708865 | 0,840648204 | 0,3395839 | 2,4755244 | 0,0133041 | 0,0440503 |            |
| ENSGALG00000007775 | 18,86724  | 0,840390709 | 0,3327596 | 2,525519  | 0,0115528 | 0,0393522 | USH1G      |
| ENSGALG00000000731 | 28,360648 | 0,840347147 | 0,3458767 | 2,4296148 | 0,0151149 | 0,0486392 | THEMIS2    |
| ENSGALG00000004593 | 2963,7081 | 0,839985137 | 0,1559067 | 5,3877418 | 7,13E-08  | 1,18E-06  | SULF2      |
| ENSGALG00000010857 | 11562,252 | 0,839106931 | 0,1136809 | 7,381249  | 1,57E-13  | 6,34E-12  | DAB1       |
| ENSGALG00000004946 | 111,2048  | 0,83835973  | 0,3100886 | 2,7036139 | 0,006859  | 0,0259771 | COL4A4     |
| ENSGALG00000010762 | 102,40709 | 0,837861719 | 0,3182395 | 2,6328025 | 0,0084684 | 0,0307881 | OPN3       |
| ENSGALG00000005204 | 101,3211  | 0,837525509 | 0,330602  | 2,5333346 | 0,0112983 | 0,0387374 | GSTT1L     |
| ENSGALG00000026505 | 1579,9758 | 0,837091894 | 0,1526832 | 5,48254   | 4,19E-08  | 7,29E-07  | RDH10      |
| ENSGALG00000003354 | 276,83001 | 0,837083394 | 0,2477788 | 3,3783489 | 0,0007292 | 0,0041177 | KCNH4      |
| ENSGALG00000011205 | 1172,7422 | 0,836341019 | 0,2011925 | 4,1569189 | 3,23E-05  | 0,0002826 | SMOC2      |
| ENSGALG00000005161 | 2738,7124 | 0,836184904 | 0,1385814 | 6,0338884 | 1,60E-09  | 3,70E-08  | PHF2       |
| ENSGALG00000006014 | 961,40069 | 0,836085862 | 0,1594344 | 5,2440759 | 1,57E-07  | 2,43E-06  | PRKCB      |
| ENSGALG00000007770 | 193,51785 | 0,835610241 | 0,2684966 | 3,1121814 | 0,0018571 | 0,00885   | FADS6      |
| ENSGALG00000020515 | 13,200692 | 0,834854635 | 0,2996969 | 2,7856631 | 0,0053418 | 0,0211799 |            |
| ENSGALG00000010044 | 118,46337 | 0,834748583 | 0,304154  | 2,7444935 | 0,0060604 | 0,0234611 | KCNMB4     |
| ENSGALG00000001071 | 194,63937 | 0,834483858 | 0,2807285 | 2,9725654 | 0,0029532 | 0,0130039 | ELN        |
| ENSGALG00000026098 | 20,591793 | 0,833498696 | 0,3202723 | 2,6024691 | 0,0092555 | 0,0330238 | IL8L2      |
| ENSGALG00000028582 | 1565,1403 | 0,832821984 | 0,1507685 | 5,5238471 | 3,32E-08  | 5,87E-07  | LMO2       |
| ENSGALG00000005481 | 1783,1099 | 0,83266607  | 0,1448108 | 5,7500286 | 8,92E-09  | 1,77E-07  | ARHGEF3    |
| ENSGALG00000015660 | 2889,8193 | 0,831570906 | 0,1228249 | 6,7703746 | 1,28E-11  | 4,00E-10  | SNX30      |
| ENSGALG00000028125 | 921,39565 | 0,831550629 | 0,1803628 | 4,6104334 | 4,02E-06  | 4,52E-05  | CACNG4     |
| ENSGALG00000011883 | 233,92984 | 0,831245154 | 0,2791409 | 2,9778696 | 0,0029026 | 0,0128183 | CLEC3B     |
| ENSGALG00000027201 | 25,956081 | 0,831158121 | 0,3370736 | 2,4658058 | 0,0136705 | 0,0449359 |            |
| ENSGALG00000011808 | 15,036213 | 0,830943596 | 0,3107832 | 2,6737086 | 0,0075018 | 0,0279749 | CCR9       |
| ENSGALG00000002771 | 197,13737 | 0,83021733  | 0,2733379 | 3,0373302 | 0,0023868 | 0,01091   | AL928654.7 |
| ENSGALG00000025776 | 414,67908 | 0,83014723  | 0,214629  | 3,8678243 | 0,0001098 | 0,0008117 | EMID1      |
| ENSGALG00000027903 | 10650,644 | 0,829170411 | 0,110533  | 7,501567  | 6,31E-14  | 2,64E-12  | HOXB5      |
| ENSGALG00000010500 | 3026,4125 | 0,828235743 | 0,1300266 | 6,3697426 | 1,89E-10  | 4,98E-09  | NKX6-2     |
| ENSGALG00000024487 | 160,03616 | 0,827463833 | 0,3258506 | 2,5393961 | 0,0111044 | 0,0382267 | C8orf22    |
| ENSGALG00000020002 | 21,954447 | 0,826702298 | 0,3346434 | 2,4703975 | 0,0134963 | 0,0445036 | SLC22A3    |
| ENSGALG00000007015 | 336,01016 | 0,825119263 | 0,2296496 | 3,5929492 | 0,000327  | 0,0020958 | CD40       |
| ENSGALG00000015720 | 662,9716  | 0,824601233 | 0,2077728 | 3,9687648 | 7,22E-05  | 0,000566  | CHODL      |
| ENSGALG00000011744 | 1298,602  | 0,824149013 | 0,1729843 | 4,7642989 | 1,90E-06  | 2,30E-05  | KALRN      |
| ENSGALG00000015575 | 115,532   | 0,823970797 | 0,3263661 | 2,5246826 | 0,0115803 | 0,0394262 | HTRA3      |
| ENSGALG00000017155 | 286,34498 | 0,823340146 | 0,2794831 | 2,9459393 | 0,0032198 | 0,0139435 | C11orf87   |
| ENSGALG00000016558 | 512,36729 | 0,822973317 | 0,2009905 | 4,0945888 | 4,23E-05  | 0,0003559 | FIGF       |
| ENSGALG00000002383 | 12,21302  | 0,822929288 | 0,2987538 | 2,75454   | 0,0058775 | 0,0228764 | CD72AG     |
| ENSGALG00000006833 | 142,93183 | 0,822822635 | 0,2953281 | 2,7861304 | 0,0053341 | 0,0211609 | ITIH2      |
| ENSGALG00000005662 | 148,91563 | 0,822087333 | 0,2869197 | 2,865217  | 0,0041672 | 0,01724   | AMPD3      |
| ENSGALG00000001688 | 9554,3654 | 0,822044682 | 0,1265194 | 6,497383  | 8,17E-11  | 2,27E-09  | sept-05    |
| ENSGALG00000015941 | 330,15649 | 0,819153887 | 0,2336045 | 3,5065841 | 0,0004539 | 0,0027625 | AP000295.9 |
| ENSGALG00000019768 | 3223,3224 | 0,819142269 | 0,1222158 | 6,7024262 | 2,05E-11  | 6,19E-10  | ACSF2      |

|                     |           |             |           |           |           |           |          |
|---------------------|-----------|-------------|-----------|-----------|-----------|-----------|----------|
| ENSGALG00000003360  | 122,83324 | 0,818748241 | 0,302344  | 2,7080025 | 0,006769  | 0,0257069 | ARL10    |
| ENSGALG000000026276 | 151,57437 | 0,818604795 | 0,2887563 | 2,834933  | 0,0045835 | 0,0186339 | TCF15    |
| ENSGALG000000003014 | 83,658638 | 0,818530331 | 0,3298981 | 2,4811612 | 0,0130955 | 0,0435185 | CHRNA3   |
| ENSGALG000000005175 | 201,26271 | 0,818212824 | 0,2767102 | 2,9569306 | 0,0031072 | 0,0135504 | BAAT     |
| ENSGALG000000017089 | 188,71558 | 0,817752266 | 0,2686445 | 3,0439946 | 0,0023346 | 0,0107165 | SLC46A3  |
| ENSGALG000000016774 | 140,17126 | 0,817235755 | 0,294664  | 2,7734498 | 0,0055465 | 0,0218779 | NPAS2    |
| ENSGALG000000010698 | 1578,3511 | 0,816916741 | 0,1404823 | 5,8150867 | 6,06E-09  | 1,25E-07  | RPS6KA5  |
| ENSGALG000000012628 | 1115,1061 | 0,816609796 | 0,1882236 | 4,3385098 | 1,43E-05  | 0,0001415 | HABP4    |
| ENSGALG000000027830 | 138,16537 | 0,816343449 | 0,2952222 | 2,7651828 | 0,0056891 | 0,0222705 | CACNG2   |
| ENSGALG000000027534 | 844,14704 | 0,815389343 | 0,1740275 | 4,6854054 | 2,79E-06  | 3,27E-05  | GM2A     |
| ENSGALG000000023601 | 110,08849 | 0,814252411 | 0,3257765 | 2,4994207 | 0,0124397 | 0,0418084 |          |
| ENSGALG000000010397 | 282,5332  | 0,813527008 | 0,2534717 | 3,2095382 | 0,0013295 | 0,0067667 | GRID2    |
| ENSGALG000000027338 | 409,81098 | 0,813282814 | 0,2198892 | 3,6986034 | 0,0002168 | 0,0014663 |          |
| ENSGALG000000015297 | 1260,5465 | 0,81224071  | 0,1674371 | 4,8510192 | 1,23E-06  | 1,57E-05  | FOXO3    |
| ENSGALG000000000954 | 405,07056 | 0,812029159 | 0,2420413 | 3,3549193 | 0,0007939 | 0,0044207 | SMPD2    |
| ENSGALG000000028570 | 89,253148 | 0,811507626 | 0,3263252 | 2,4868067 | 0,0128895 | 0,0429494 | C6orf132 |
| ENSGALG000000006480 | 1820,4374 | 0,810690895 | 0,1479509 | 5,4794584 | 4,27E-08  | 7,41E-07  | TCF7     |
| ENSGALG000000011861 | 430,59758 | 0,810665245 | 0,2125716 | 3,8136096 | 0,000137  | 0,0009866 | SYT16    |
| ENSGALG000000011615 | 12,005704 | 0,809627409 | 0,2973783 | 2,7225505 | 0,006478  | 0,0248312 | SLC22A2  |
| ENSGALG000000009680 | 349,5215  | 0,809243098 | 0,2208092 | 3,6648968 | 0,0002474 | 0,0016447 | PAQR7    |
| ENSGALG000000001605 | 101,47062 | 0,807232306 | 0,3186097 | 2,5336084 | 0,0112895 | 0,0387248 | PPM1J    |
| ENSGALG000000015051 | 777,65205 | 0,807158582 | 0,1825122 | 4,4224914 | 9,76E-06  | 0,0001009 | CDK19    |
| ENSGALG000000013051 | 1092,6973 | 0,806546944 | 0,1922229 | 4,1958947 | 2,72E-05  | 0,0002436 | SEMA5A   |
| ENSGALG000000024090 | 246,87805 | 0,806200799 | 0,263668  | 3,0576358 | 0,0022309 | 0,0103145 | UNC93B1  |
| ENSGALG000000005147 | 486,92842 | 0,80606613  | 0,2005832 | 4,0186116 | 5,85E-05  | 0,0004713 | AMY1A    |
| ENSGALG000000013600 | 13,810453 | 0,805946686 | 0,307319  | 2,6225087 | 0,0087285 | 0,0315473 |          |
| ENSGALG000000004260 | 114,05372 | 0,805411915 | 0,3114119 | 2,5863235 | 0,0097006 | 0,0343137 | PKP3     |
| ENSGALG000000008980 | 97,942464 | 0,805130642 | 0,3170949 | 2,5390838 | 0,0111143 | 0,0382415 | VWA2     |
| ENSGALG000000017016 | 265,33781 | 0,804980828 | 0,247719  | 3,2495724 | 0,0011558 | 0,0060245 | FAM124A  |
| ENSGALG000000015608 | 746,79897 | 0,802634493 | 0,1733654 | 4,629727  | 3,66E-06  | 4,17E-05  | ADRA2C   |
| ENSGALG000000011394 | 463,3825  | 0,801850887 | 0,2051329 | 3,9089335 | 9,27E-05  | 0,0007038 | CYP2J2L3 |
| ENSGALG000000003261 | 114,4772  | 0,800174677 | 0,3173455 | 2,5214623 | 0,0116868 | 0,0397492 | PTRF     |
| ENSGALG000000007186 | 16,312433 | 0,798835823 | 0,3250305 | 2,457726  | 0,013982  | 0,0457372 | C9orf91  |
| ENSGALG000000007565 | 677,7029  | 0,798729286 | 0,2213224 | 3,6088951 | 0,0003075 | 0,0019851 | PPP2R2B  |
| ENSGALG000000027043 | 126,47192 | 0,798613446 | 0,3175009 | 2,515311  | 0,0118927 | 0,0403187 | KCNH2    |
| ENSGALG000000012073 | 470,07631 | 0,797159786 | 0,2039204 | 3,9091719 | 9,26E-05  | 0,0007038 | SFRP4    |
| ENSGALG000000008408 | 1323,0351 | 0,796075417 | 0,1521355 | 5,2326742 | 1,67E-07  | 2,57E-06  | GAB3     |
| ENSGALG000000014122 | 10545,592 | 0,795943411 | 0,1349861 | 5,8964838 | 3,71E-09  | 8,08E-08  | CYB5R3   |
| ENSGALG000000000865 | 119,7276  | 0,795679669 | 0,3113005 | 2,5559862 | 0,0105887 | 0,0368427 |          |
| ENSGALG000000014313 | 191,48762 | 0,795282607 | 0,2722671 | 2,9209643 | 0,0034895 | 0,0149206 |          |
| ENSGALG000000013489 | 630,05884 | 0,794845244 | 0,1872111 | 4,2457157 | 2,18E-05  | 0,000202  | CCDC82   |
| ENSGALG000000015233 | 5666,2368 | 0,794464087 | 0,1575131 | 5,0437964 | 4,56E-07  | 6,39E-06  | ATP1B1   |
| ENSGALG000000006507 | 1217,4322 | 0,793097237 | 0,1534206 | 5,169432  | 2,35E-07  | 3,49E-06  | CLMP     |
| ENSGALG000000017267 | 12,565544 | 0,792427514 | 0,2952723 | 2,6837179 | 0,0072809 | 0,0272932 | THRSP    |
| ENSGALG000000026605 | 1028,743  | 0,792369586 | 0,1581582 | 5,0099806 | 5,44E-07  | 7,52E-06  | BAG2     |
| ENSGALG000000007720 | 244,44298 | 0,792327844 | 0,2555746 | 3,1001818 | 0,001934  | 0,009178  | AIFM3    |
| ENSGALG000000006319 | 831,26714 | 0,791303644 | 0,1737644 | 4,5538886 | 5,27E-06  | 5,80E-05  | TGFBI    |
| ENSGALG000000028576 | 735,47031 | 0,790565069 | 0,2313869 | 3,4166365 | 0,000634  | 0,0036529 | PAX1     |
| ENSGALG000000010708 | 2290,4638 | 0,790532368 | 0,1502852 | 5,2602149 | 1,44E-07  | 2,24E-06  | ICA1     |
| ENSGALG000000021589 | 1830,7464 | 0,790216265 | 0,177386  | 4,4547837 | 8,40E-06  | 8,83E-05  | RTN4RL1  |
| ENSGALG000000027458 | 914,19579 | 0,790135397 | 0,1634873 | 4,8330066 | 1,34E-06  | 1,70E-05  |          |
| ENSGALG000000014300 | 310,95646 | 0,790002156 | 0,2504565 | 3,1542493 | 0,0016091 | 0,0078863 | KLB      |
| ENSGALG000000013862 | 6295,0756 | 0,789845326 | 0,1439094 | 5,4884886 | 4,05E-08  | 7,08E-07  | OLIG3    |
| ENSGALG000000026899 | 678,26051 | 0,789824953 | 0,18654   | 4,2340774 | 2,29E-05  | 0,000211  | CHSY3    |
| ENSGALG000000020522 | 2265,9648 | 0,78974705  | 0,152638  | 5,1739888 | 2,29E-07  | 3,42E-06  | MYRF     |
| ENSGALG000000009039 | 1670,7449 | 0,789311851 | 0,1468245 | 5,375886  | 7,62E-08  | 1,25E-06  | NPDC1    |
| ENSGALG000000003933 | 4489,5312 | 0,788744436 | 0,1311022 | 6,0162586 | 1,78E-09  | 4,11E-08  | QSOX1    |
| ENSGALG000000013642 | 1029,7112 | 0,788560165 | 0,1619937 | 4,8678436 | 1,13E-06  | 1,46E-05  | KAZN     |
| ENSGALG000000006453 | 2069,6286 | 0,788464487 | 0,1533354 | 5,1420896 | 2,72E-07  | 3,98E-06  | TF       |
| ENSGALG000000007623 | 3327,2226 | 0,788173273 | 0,1396726 | 5,6430046 | 1,67E-08  | 3,18E-07  | CACNA1G  |
| ENSGALG000000024097 | 498,63238 | 0,787003033 | 0,253676  | 3,102395  | 0,0019196 | 0,0091192 | AGBL2    |
| ENSGALG000000011913 | 446,23727 | 0,78594155  | 0,2729807 | 2,8791099 | 0,003988  | 0,0166514 | sept-03  |

|                     |           |             |           |           |           |           |             |
|---------------------|-----------|-------------|-----------|-----------|-----------|-----------|-------------|
| ENSGALG00000005849  | 1033,3817 | 0,784505411 | 0,1637307 | 4,7914382 | 1,66E-06  | 2,05E-05  | PPDPF       |
| ENSGALG00000000076  | 922,87992 | 0,7843985   | 0,1622181 | 4,8354571 | 1,33E-06  | 1,68E-05  | NRBP2       |
| ENSGALG000000016507 | 201,43925 | 0,784023754 | 0,2659211 | 2,9483321 | 0,0031949 | 0,0138709 | FNDC4       |
| ENSGALG000000012116 | 675,67694 | 0,783832372 | 0,1875924 | 4,1783795 | 2,94E-05  | 0,0002606 | EEPD1       |
| ENSGALG000000006508 | 175,86669 | 0,783784604 | 0,2797588 | 2,8016444 | 0,0050843 | 0,0203416 | FGF13       |
| ENSGALG000000011635 | 890,9248  | 0,783625313 | 0,1778317 | 4,4065551 | 1,05E-05  | 0,0001078 | TFCP2L1     |
| ENSGALG000000000313 | 165,09493 | 0,78307364  | 0,2881217 | 2,7178574 | 0,0065706 | 0,0251007 | TNNI1       |
| ENSGALG000000003900 | 14,168362 | 0,782866932 | 0,3173181 | 2,467136  | 0,0136199 | 0,0448342 | CACNG1      |
| ENSGALG000000027788 | 2064,8116 | 0,782858625 | 0,1847884 | 4,2365144 | 2,27E-05  | 0,0002093 | CPE         |
| ENSGALG000000009866 | 599,48537 | 0,782677583 | 0,2085508 | 3,7529357 | 0,0001748 | 0,0012203 | CAMK1D      |
| ENSGALG000000023069 | 225,10329 | 0,782582264 | 0,2592407 | 3,0187478 | 0,0025382 | 0,0114506 | MYRIP       |
| ENSGALG000000020376 | 2337,0409 | 0,781084057 | 0,129917  | 6,0121758 | 1,83E-09  | 4,20E-08  |             |
| ENSGALG000000024447 | 255,3388  | 0,780783451 | 0,2581275 | 3,0247981 | 0,002488  | 0,0112763 | NMB         |
| ENSGALG000000007357 | 1727,6304 | 0,780757803 | 0,1788255 | 4,3660311 | 1,27E-05  | 0,0001264 | BCL6        |
| ENSGALG000000021240 | 149,64373 | 0,780471598 | 0,2990547 | 2,6097954 | 0,0090596 | 0,0324549 |             |
| ENSGALG000000009407 | 420,64448 | 0,780277328 | 0,2147109 | 3,6340831 | 0,000279  | 0,0018234 |             |
| ENSGALG000000021620 | 400,19342 | 0,780112352 | 0,215822  | 3,6146106 | 0,0003008 | 0,0019465 | TMEM59L     |
| ENSGALG000000005657 | 1485,5044 | 0,780089243 | 0,2099353 | 3,7158564 | 0,0002025 | 0,0013786 | CRHR2       |
| ENSGALG000000017327 | 228,75567 | 0,779838018 | 0,2748161 | 2,8376719 | 0,0045444 | 0,0184913 | P2RY6       |
| ENSGALG000000017065 | 605,99073 | 0,779643959 | 0,2212955 | 3,5230893 | 0,0004265 | 0,0026302 | STARD13     |
| ENSGALG000000015379 | 3926,961  | 0,779239634 | 0,1720773 | 4,5284285 | 5,94E-06  | 6,41E-05  | TAGLN3      |
| ENSGALG000000010898 | 121,86089 | 0,778406503 | 0,3067735 | 2,5373979 | 0,011168  | 0,0383873 | BMP3        |
| ENSGALG000000001735 | 332,00127 | 0,778269785 | 0,3162815 | 2,4606869 | 0,0138671 | 0,0454285 | LHX4        |
| ENSGALG000000005418 | 474,48986 | 0,777790922 | 0,2764455 | 2,8135412 | 0,0048999 | 0,019755  | FRRS1       |
| ENSGALG000000015615 | 136,43246 | 0,777196481 | 0,3023569 | 2,5704607 | 0,0101563 | 0,0355929 | DOK7        |
| ENSGALG000000005539 | 507,50867 | 0,77704495  | 0,1983441 | 3,9176614 | 8,94E-05  | 0,0006824 | ITM2C       |
| ENSGALG000000009612 | 1284,262  | 0,776962988 | 0,1567277 | 4,9574072 | 7,14E-07  | 9,55E-06  | TGFB2       |
| ENSGALG000000005421 | 527,43362 | 0,776882668 | 0,193304  | 4,0189685 | 5,85E-05  | 0,0004709 | TEX2L       |
| ENSGALG000000017086 | 244,06613 | 0,776712467 | 0,2590522 | 2,9982852 | 0,002715  | 0,0121396 | MTUS2       |
| ENSGALG000000026326 | 2889,7968 | 0,77526969  | 0,1465876 | 5,2887801 | 1,23E-07  | 1,94E-06  | WBP1L       |
| ENSGALG000000003747 | 210,55966 | 0,773681017 | 0,268223  | 2,8844693 | 0,0039207 | 0,0164299 | OSMR        |
| ENSGALG000000002708 | 2271,2308 | 0,772455755 | 0,1693238 | 4,5620036 | 5,07E-06  | 5,60E-05  | LINGO1      |
| ENSGALG000000011986 | 13,457929 | 0,772453397 | 0,3038739 | 2,5420199 | 0,0110214 | 0,0380183 | FABP2       |
| ENSGALG000000004183 | 169,51264 | 0,772146407 | 0,2847172 | 2,7119762 | 0,0066883 | 0,0255075 | FAM20A      |
| ENSGALG000000013404 | 465,07043 | 0,770980594 | 0,2045333 | 3,7694617 | 0,0001636 | 0,0011517 | AK8         |
| ENSGALG000000002283 | 1172,584  | 0,770174106 | 0,1718025 | 4,482905  | 7,36E-06  | 7,80E-05  | MAPKAPK3    |
| ENSGALG000000017208 | 521,56067 | 0,769802089 | 0,1959747 | 3,9280679 | 8,56E-05  | 0,0006572 | AMOTL1      |
| ENSGALG000000013350 | 163,60204 | 0,766573209 | 0,2847601 | 2,6919969 | 0,0071026 | 0,0267426 | MTMR11      |
| ENSGALG000000027592 | 1174,3515 | 0,765780883 | 0,1667631 | 4,5920291 | 4,39E-06  | 4,91E-05  | ERN1        |
| ENSGALG000000005779 | 2301,589  | 0,765244932 | 0,1290039 | 5,9319529 | 2,99E-09  | 6,58E-08  | FBXO31      |
| ENSGALG000000006900 | 414,72698 | 0,764663976 | 0,2420639 | 3,158934  | 0,0015835 | 0,0077802 | ST6GALNAC2L |
| ENSGALG000000004323 | 3702,9555 | 0,7637615   | 0,1520557 | 5,0229053 | 5,09E-07  | 7,07E-06  | RASAL2      |
| ENSGALG000000007744 | 1224,4032 | 0,76351713  | 0,1645392 | 4,6403371 | 3,48E-06  | 3,98E-05  | CASS4       |
| ENSGALG000000000897 | 268,90562 | 0,763363816 | 0,249632  | 3,0579566 | 0,0022285 | 0,0103145 | LHFPL5      |
| ENSGALG000000004491 | 190,54596 | 0,761794314 | 0,2733192 | 2,7871964 | 0,0053166 | 0,0211161 | DMGDH       |
| ENSGALG000000002069 | 610,16885 | 0,761037525 | 0,2096031 | 3,6308501 | 0,0002825 | 0,0018438 | FAM214B     |
| ENSGALG000000013948 | 736,87288 | 0,760675086 | 0,1727814 | 4,402528  | 1,07E-05  | 0,0001095 | RASL11B     |
| ENSGALG000000006642 | 162,08607 | 0,760653303 | 0,2972229 | 2,5592016 | 0,0104913 | 0,0365597 | ADORA2A     |
| ENSGALG000000015115 | 155,99801 | 0,760473682 | 0,2860137 | 2,6588715 | 0,0078403 | 0,028999  | MAMDC2      |
| ENSGALG000000002804 | 155,62632 | 0,759679339 | 0,2858837 | 2,6573024 | 0,0078769 | 0,0290949 | RND2        |
| ENSGALG000000007956 | 2266,7266 | 0,759404394 | 0,1455052 | 5,2190893 | 1,80E-07  | 2,75E-06  | PLXDC2      |
| ENSGALG000000007748 | 2468,6975 | 0,758936347 | 0,126557  | 5,9967954 | 2,01E-09  | 4,56E-08  | SLC16A2     |
| ENSGALG000000004170 | 385,32134 | 0,75875998  | 0,2343812 | 3,23729   | 0,0012067 | 0,0062493 | ADA         |
| ENSGALG000000015688 | 1188,5305 | 0,758515207 | 0,1730216 | 4,3839346 | 1,17E-05  | 0,0001181 | MXD4        |
| ENSGALG000000006576 | 399,34369 | 0,758241661 | 0,2615129 | 2,8994424 | 0,0037383 | 0,015831  | GRM3        |
| ENSGALG000000001933 | 120,41471 | 0,757286355 | 0,3102287 | 2,4410587 | 0,0146443 | 0,0474719 | CORO2A      |
| ENSGALG000000003115 | 505,20482 | 0,756684773 | 0,2022143 | 3,7419946 | 0,0001826 | 0,0012662 | COL4A3      |
| ENSGALG000000007889 | 769,26198 | 0,756666335 | 0,1846622 | 4,0975693 | 4,18E-05  | 0,0003529 | CCDC85A     |
| ENSGALG000000006346 | 1339,3203 | 0,756405715 | 0,1832878 | 4,1268742 | 3,68E-05  | 0,0003163 | CXCL14      |
| ENSGALG000000026153 | 524,42092 | 0,755983234 | 0,2314691 | 3,2660225 | 0,0010907 | 0,0057424 | FOXO6       |
| ENSGALG000000026091 | 117,64664 | 0,755485898 | 0,3112696 | 2,4271108 | 0,0152196 | 0,0489092 |             |
| ENSGALG000000002958 | 2112,9504 | 0,755313619 | 0,167448  | 4,510735  | 6,46E-06  | 6,90E-05  | DNER        |



|                    |           |             |           |           |           |           |               |
|--------------------|-----------|-------------|-----------|-----------|-----------|-----------|---------------|
| ENSGALG00000001311 | 1301,9009 | 0,752137925 | 0,1518518 | 4,9531061 | 7,30E-07  | 9,72E-06  | ARHGAP44      |
| ENSGALG00000027905 | 3422,0143 | 0,751625166 | 0,132987  | 5,6518692 | 1,59E-08  | 3,03E-07  | CSRNPI        |
| ENSGALG00000009439 | 631,53261 | 0,751125582 | 0,2024985 | 3,7092895 | 0,0002078 | 0,0014128 | GPR85         |
| ENSGALG00000006795 | 336,85781 | 0,75042189  | 0,2480756 | 3,0249723 | 0,0024866 | 0,0112763 | ABCG4         |
| ENSGALG00000029047 | 339,90745 | 0,749178885 | 0,226666  | 3,30521   | 0,0009491 | 0,0051255 | TMEM204       |
| ENSGALG00000015729 | 1439,0922 | 0,747405326 | 0,14976   | 4,9906871 | 6,02E-07  | 8,18E-06  | LPAR1         |
| ENSGALG00000019030 | 11,696679 | 0,747320322 | 0,2902826 | 2,5744581 | 0,0100397 | 0,035266  |               |
| ENSGALG00000006203 | 182,30527 | 0,747208785 | 0,2854721 | 2,6174493 | 0,008859  | 0,0319171 |               |
| ENSGALG00000001969 | 1252,395  | 0,746864271 | 0,1550045 | 4,8183402 | 1,45E-06  | 1,82E-05  | LPPR3         |
| ENSGALG00000006050 | 280,4499  | 0,74642112  | 0,2472463 | 3,0189372 | 0,0025366 | 0,0114472 | CYP2R1        |
| ENSGALG00000004420 | 2554,1446 | 0,745430944 | 0,1535099 | 4,8559134 | 1,20E-06  | 1,54E-05  | SDK1          |
| ENSGALG00000018733 | 341,10493 | 0,744919582 | 0,2235871 | 3,3316754 | 0,0008632 | 0,0047277 |               |
| ENSGALG00000023828 | 228,11537 | 0,744788155 | 0,2585381 | 2,8807671 | 0,0039671 | 0,0165833 | LDHD          |
| ENSGALG00000007849 | 195,07279 | 0,744715772 | 0,2780479 | 2,6783724 | 0,0073981 | 0,0276565 | CD44          |
| ENSGALG00000005063 | 630,43033 | 0,74466275  | 0,1956389 | 3,8063128 | 0,0001411 | 0,0010113 | ST6GALNAC4    |
| ENSGALG00000017050 | 201,15206 | 0,743800542 | 0,2755212 | 2,6996126 | 0,006942  | 0,0262325 | SMAD9         |
| ENSGALG00000026919 | 497,57567 | 0,743491927 | 0,2001741 | 3,7142261 | 0,0002038 | 0,0013869 |               |
| ENSGALG00000025937 | 424,74226 | 0,743354667 | 0,2192559 | 3,3903524 | 0,000698  | 0,0039714 | FXVD6         |
| ENSGALG00000012712 | 2097,8069 | 0,742584862 | 0,1498005 | 4,9571602 | 7,15E-07  | 9,56E-06  | RBM24         |
| ENSGALG00000015994 | 1103,9909 | 0,741778145 | 0,1550114 | 4,7853126 | 1,71E-06  | 2,10E-05  | MAVS          |
| ENSGALG00000016622 | 136,85244 | 0,741316835 | 0,3044477 | 2,4349564 | 0,0148936 | 0,0481221 | STS           |
| ENSGALG00000001449 | 3789,5374 | 0,740070536 | 0,1451567 | 5,0984252 | 3,42E-07  | 4,93E-06  | STRA6         |
| ENSGALG00000006467 | 165,38559 | 0,739825587 | 0,2835935 | 2,6087534 | 0,0090873 | 0,0325074 | XKR7          |
| ENSGALG00000003022 | 149,11768 | 0,738879702 | 0,2881931 | 2,5638358 | 0,0103522 | 0,0361678 |               |
| ENSGALG00000026449 | 3878,5798 | 0,737442369 | 0,1336353 | 5,5183189 | 3,42E-08  | 6,04E-07  |               |
| ENSGALG00000011524 | 227,70396 | 0,737317525 | 0,2799    | 2,6342174 | 0,0084331 | 0,0306998 | PPEF2         |
| ENSGALG00000002539 | 465,9328  | 0,737264559 | 0,2112723 | 3,4896412 | 0,0004837 | 0,002919  | KCNN2         |
| ENSGALG00000022001 | 220,24358 | 0,737013016 | 0,2592948 | 2,8423753 | 0,0044779 | 0,0182643 | CAMKV         |
| ENSGALG00000016749 | 204,45908 | 0,736312128 | 0,2623793 | 2,8062894 | 0,0050116 | 0,0200861 | CNGA3         |
| ENSGALG00000008339 | 615,63573 | 0,736061451 | 0,1948925 | 3,776756  | 0,0001589 | 0,0011208 | GRM7          |
| ENSGALG00000013002 | 3217,4534 | 0,734684533 | 0,1469698 | 4,9988824 | 5,77E-07  | 7,89E-06  | DAP           |
| ENSGALG00000019087 | 2799,7159 | 0,734240753 | 0,1295389 | 5,6681115 | 1,44E-08  | 2,78E-07  | RFXAP         |
| ENSGALG00000011059 | 526,88294 | 0,733913318 | 0,20212   | 3,6310777 | 0,0002822 | 0,001843  | HOX1B         |
| ENSGALG00000019291 | 131,18453 | 0,733807509 | 0,2877581 | 2,5500843 | 0,0107697 | 0,0373103 |               |
| ENSGALG00000010326 | 286,24182 | 0,733495449 | 0,2372268 | 3,0919588 | 0,0019884 | 0,0093882 | FLVCR2        |
| ENSGALG00000008433 | 2910,7777 | 0,732487    | 0,1303149 | 5,6209017 | 1,90E-08  | 3,57E-07  | FZD2          |
| ENSGALG00000008076 | 5047,2961 | 0,731953468 | 0,1274268 | 5,7441112 | 9,24E-09  | 1,83E-07  | TMEM164       |
| ENSGALG00000006897 | 1904,4846 | 0,73176707  | 0,1370838 | 5,3381014 | 9,39E-08  | 1,52E-06  |               |
| ENSGALG00000025916 | 1511,635  | 0,730226914 | 0,1971166 | 3,7045423 | 0,0002118 | 0,0014359 | EMILIN3       |
| ENSGALG00000002651 | 2712,1143 | 0,730025866 | 0,128861  | 5,6652212 | 1,47E-08  | 2,82E-07  | ST3GAL2       |
| ENSGALG00000012191 | 7671,5827 | 0,72968259  | 0,1256369 | 5,8078663 | 6,33E-09  | 1,30E-07  | LGR4          |
| ENSGALG00000002451 | 1225,1572 | 0,728956851 | 0,1533766 | 4,7527269 | 2,01E-06  | 2,41E-05  | KCNT2         |
| ENSGALG00000019317 | 6925,165  | 0,728083244 | 0,1200043 | 6,0671438 | 1,30E-09  | 3,05E-08  | JOSD1         |
| ENSGALG00000001561 | 154,80244 | 0,72739532  | 0,2918515 | 2,4923472 | 0,0126902 | 0,0424526 | MXRA8         |
| ENSGALG00000013925 | 194,37903 | 0,727322252 | 0,27832   | 2,6132593 | 0,0089683 | 0,0321919 | KIT           |
| ENSGALG00000000400 | 352,09264 | 0,727285624 | 0,2194005 | 3,3148775 | 0,0009168 | 0,0049811 | KCNC4         |
| ENSGALG00000013143 | 266,7402  | 0,72680287  | 0,2471882 | 2,9402819 | 0,0032791 | 0,0141417 | PDE3A         |
| ENSGALG00000014910 | 3784,5308 | 0,72588259  | 0,1623113 | 4,4721633 | 7,74E-06  | 8,18E-05  | COLEC12       |
| ENSGALG00000023083 | 215,10004 | 0,725643274 | 0,2997631 | 2,4207225 | 0,0154897 | 0,0496386 | KIAA1958      |
| ENSGALG00000004875 | 3335,2739 | 0,724796191 | 0,1381226 | 5,2474846 | 1,54E-07  | 2,39E-06  | PEMT          |
| ENSGALG00000015123 | 798,45006 | 0,722653298 | 0,1722336 | 4,1957734 | 2,72E-05  | 0,0002436 | ZDHHC23       |
| ENSGALG00000026864 | 531,42097 | 0,721498621 | 0,203036  | 3,5535495 | 0,0003801 | 0,0023748 | ZCCHC24       |
| ENSGALG00000011426 | 2063,2289 | 0,721230387 | 0,1613379 | 4,4703085 | 7,81E-06  | 8,24E-05  | RP11-514O12.4 |
| ENSGALG00000000723 | 8396,3268 | 0,72079059  | 0,1405098 | 5,1298237 | 2,90E-07  | 4,21E-06  | STX12         |
| ENSGALG00000008914 | 183,84781 | 0,720697485 | 0,2822547 | 2,5533588 | 0,010669  | 0,0370556 | NRAP          |
| ENSGALG00000002558 | 389,45186 | 0,720642154 | 0,2290837 | 3,1457591 | 0,0016566 | 0,0080666 | ASL1          |
| ENSGALG00000001459 | 1037,3333 | 0,719793089 | 0,1787902 | 4,0259094 | 5,68E-05  | 0,0004594 | TNNC1         |
| ENSGALG00000007981 | 2067,6116 | 0,719546729 | 0,1428586 | 5,0367766 | 4,73E-07  | 6,61E-06  | CLN6          |
| ENSGALG00000009042 | 1726,6169 | 0,719468223 | 0,1493757 | 4,8165026 | 1,46E-06  | 1,83E-05  | ISM1          |
| ENSGALG00000017296 | 332,74685 | 0,719276435 | 0,2726134 | 2,6384485 | 0,0083286 | 0,0303762 | KLHL42        |
| ENSGALG00000003855 | 2094,2466 | 0,719100031 | 0,1368455 | 5,2548333 | 1,48E-07  | 2,31E-06  | SRC           |
| ENSGALG00000017031 | 283,53237 | 0,718524914 | 0,2888562 | 2,4874835 | 0,012865  | 0,0429181 | TPTE2         |

|                    |           |             |           |           |           |           |               |
|--------------------|-----------|-------------|-----------|-----------|-----------|-----------|---------------|
| ENSGALG00000015403 | 10307,491 | 0,718054416 | 0,1317872 | 5,4485916 | 5,08E-08  | 8,65E-07  | EPHA3         |
| ENSGALG00000007383 | 515,08856 | 0,717575013 | 0,2017592 | 3,5565912 | 0,0003757 | 0,0023529 | HSPB8         |
| ENSGALG00000012792 | 5661,7981 | 0,717520705 | 0,1251036 | 5,7354139 | 9,73E-09  | 1,92E-07  | HIPK2         |
| ENSGALG00000013583 | 619,65104 | 0,717484093 | 0,2169479 | 3,3071723 | 0,0009424 | 0,0050958 | FAM114A1      |
| ENSGALG00000024012 | 315,05149 | 0,716701131 | 0,2440127 | 2,937147  | 0,0033125 | 0,0142674 | TDRKH         |
| ENSGALG00000023607 | 192,83095 | 0,714467677 | 0,2785112 | 2,5653106 | 0,0103083 | 0,0360237 | ASCL2         |
| ENSGALG00000004812 | 420,51393 | 0,714148656 | 0,2276151 | 3,1375277 | 0,0017038 | 0,0082611 | FAM129A       |
| ENSGALG00000003340 | 440,9962  | 0,714011033 | 0,2132487 | 3,3482552 | 0,0008132 | 0,0044953 | GBGT1         |
| ENSGALG00000001233 | 1022,3151 | 0,713516886 | 0,1751304 | 4,0742031 | 4,62E-05  | 0,0003833 | RHCE          |
| ENSGALG00000026230 | 11,282047 | 0,713226116 | 0,2861696 | 2,49232   | 0,0126912 | 0,0424526 |               |
| ENSGALG00000007244 | 345,61048 | 0,711922899 | 0,2206692 | 3,2261997 | 0,0012545 | 0,0064477 | SIRT4         |
| ENSGALG00000009628 | 330,24566 | 0,711918795 | 0,2307632 | 3,085062  | 0,0020351 | 0,0095809 |               |
| ENSGALG00000003282 | 5419,4179 | 0,711820753 | 0,1111661 | 6,4032191 | 1,52E-10  | 4,05E-09  | STAT5B        |
| ENSGALG00000007196 | 4102,6967 | 0,710478048 | 0,1280928 | 5,5465879 | 2,91E-08  | 5,23E-07  | STXBP1        |
| ENSGALG00000003805 | 6589,8039 | 0,710406685 | 0,1297333 | 5,4759004 | 4,35E-08  | 7,53E-07  | PRKG1         |
| ENSGALG00000001130 | 1241,2514 | 0,709264893 | 0,1624051 | 4,3672563 | 1,26E-05  | 0,0001259 | WBSCR17       |
| ENSGALG00000020794 | 10,814613 | 0,707249449 | 0,285562  | 2,4766932 | 0,0132606 | 0,0439509 |               |
| ENSGALG00000002038 | 769,11793 | 0,706334316 | 0,1755894 | 4,0226475 | 5,75E-05  | 0,000465  | DENND2C       |
| ENSGALG00000007618 | 10,281175 | 0,705775117 | 0,2855705 | 2,4714563 | 0,0134564 | 0,0444413 | BTG4          |
| ENSGALG00000028443 | 5716,4355 | 0,705249503 | 0,169055  | 4,1717175 | 3,02E-05  | 0,0002673 | CSPG5         |
| ENSGALG00000023738 | 705,32888 | 0,704601132 | 0,2001565 | 3,5202511 | 0,0004311 | 0,0026513 |               |
| ENSGALG00000010320 | 1626,0227 | 0,704383823 | 0,138468  | 5,0869789 | 3,64E-07  | 5,19E-06  | PAWR          |
| ENSGALG00000028685 | 205,34816 | 0,704382223 | 0,2842057 | 2,4784238 | 0,0131964 | 0,0437898 |               |
| ENSGALG00000001640 | 312,33982 | 0,704326284 | 0,2358711 | 2,9860645 | 0,0028259 | 0,0125489 | RNF122        |
| ENSGALG00000000599 | 300,39451 | 0,703788264 | 0,2449165 | 2,8735847 | 0,0040584 | 0,0168977 | mars-02       |
| ENSGALG00000026437 | 5573,4884 | 0,703536871 | 0,1156883 | 6,0813142 | 1,19E-09  | 2,80E-08  |               |
| ENSGALG00000004735 | 2180,5981 | 0,703327732 | 0,1488288 | 4,7257505 | 2,29E-06  | 2,73E-05  | MAP2K3        |
| ENSGALG00000026973 | 1340,8175 | 0,702510997 | 0,1463553 | 4,8000384 | 1,59E-06  | 1,97E-05  | KIF3C         |
| ENSGALG00000026873 | 606,99857 | 0,701267796 | 0,1971895 | 3,5563142 | 0,0003761 | 0,0023543 | RSPO2         |
| ENSGALG00000017269 | 189,52991 | 0,70061916  | 0,2816451 | 2,4875958 | 0,012861  | 0,0429172 | USP35         |
| ENSGALG00000023266 | 1017,6993 | 0,69953934  | 0,177551  | 3,9399339 | 8,15E-05  | 0,0006287 | INPP5J        |
| ENSGALG00000027058 | 1118,3528 | 0,699526976 | 0,185719  | 3,7665882 | 0,0001655 | 0,001164  | EMP2          |
| ENSGALG00000028018 | 221,75017 | 0,69904366  | 0,2851436 | 2,4515496 | 0,0142243 | 0,0463753 | RAB38         |
| ENSGALG00000020497 | 375,96471 | 0,698148301 | 0,21726   | 3,2134229 | 0,0013116 | 0,0066923 | IFITM10       |
| ENSGALG00000008902 | 238,20892 | 0,6980432   | 0,2801236 | 2,4919118 | 0,0127058 | 0,0424825 | GIPC2         |
| ENSGALG00000004647 | 2581,3028 | 0,697164089 | 0,1609537 | 4,3314572 | 1,48E-05  | 0,0001453 | C5H15ORF57    |
| ENSGALG00000015181 | 1358,5983 | 0,696928823 | 0,1980876 | 3,518286  | 0,0004343 | 0,0026634 | GAREM1        |
| ENSGALG00000016299 | 188,53968 | 0,696461514 | 0,2699353 | 2,5801055 | 0,009877  | 0,0348087 | FAM83B        |
| ENSGALG00000028945 | 1325,8832 | 0,696399862 | 0,1972938 | 3,5297611 | 0,0004159 | 0,0025729 | LGI2          |
| ENSGALG00000007349 | 388,2147  | 0,696333265 | 0,2142206 | 3,2505423 | 0,0011519 | 0,0060109 | RASL12        |
| ENSGALG00000008455 | 4612,7445 | 0,695894902 | 0,1608753 | 4,3256789 | 1,52E-05  | 0,0001481 | SEMA3C        |
| ENSGALG00000010094 | 8338,3892 | 0,695566561 | 0,1102371 | 6,3097346 | 2,80E-10  | 7,11E-09  | B4GALT2       |
| ENSGALG00000008250 | 259,75115 | 0,695347261 | 0,2674448 | 2,5999651 | 0,0093233 | 0,0332035 | TBX3          |
| ENSGALG00000010331 | 1143,0104 | 0,693784562 | 0,1997471 | 3,4733156 | 0,0005141 | 0,0030671 | MME           |
| ENSGALG00000010406 | 684,71072 | 0,693540735 | 0,1775952 | 3,9051762 | 9,42E-05  | 0,0007122 | TMEM63C       |
| ENSGALG00000001889 | 934,57066 | 0,693259058 | 0,1726852 | 4,0145828 | 5,96E-05  | 0,0004785 | CARD9         |
| ENSGALG00000008651 | 2483,2004 | 0,693028969 | 0,1577851 | 4,3922326 | 1,12E-05  | 0,0001142 | APMAP         |
| ENSGALG00000005103 | 1726,7826 | 0,692645693 | 0,1383584 | 5,0061716 | 5,55E-07  | 7,63E-06  | GDPD1         |
| ENSGALG00000023188 | 975,83818 | 0,692540652 | 0,1600052 | 4,3282373 | 1,50E-05  | 0,0001471 | NANP          |
| ENSGALG00000001697 | 10,047458 | 0,69224725  | 0,2838775 | 2,4385418 | 0,0147467 | 0,0477354 | ITIH3         |
| ENSGALG00000002192 | 251,47548 | 0,692054061 | 0,2782223 | 2,4874138 | 0,0128676 | 0,0429181 | PTPRC         |
| ENSGALG00000003636 | 432,59045 | 0,690941222 | 0,2090885 | 3,3045388 | 0,0009513 | 0,0051317 | FBLIM1        |
| ENSGALG00000020575 | 447,18026 | 0,690014438 | 0,2210762 | 3,1211618 | 0,0018014 | 0,0086359 | ERMN          |
| ENSGALG00000023655 | 726,63007 | 0,689103212 | 0,1781324 | 3,8684889 | 0,0001095 | 0,0008103 |               |
| ENSGALG00000019436 | 255,33631 | 0,68869647  | 0,2721433 | 2,5306391 | 0,0113855 | 0,0389481 | MAL2          |
| ENSGALG00000011356 | 243,58893 | 0,688404159 | 0,2584311 | 2,6637818 | 0,0077268 | 0,0286811 |               |
| ENSGALG00000003122 | 2359,0002 | 0,68839827  | 0,1635612 | 4,2088128 | 2,57E-05  | 0,0002327 | ZFAND2A       |
| ENSGALG00000026361 | 265,71557 | 0,687466561 | 0,2597715 | 2,6464277 | 0,0081347 | 0,0297885 | SLITRK5       |
| ENSGALG00000002749 | 1561,2531 | 0,687223145 | 0,1398964 | 4,9123728 | 9,00E-07  | 1,18E-05  | RP11-565P22.6 |
| ENSGALG00000001342 | 285,4866  | 0,686942007 | 0,2446203 | 2,8081975 | 0,004982  | 0,0200146 | HCN2          |
| ENSGALG00000016844 | 1336,9691 | 0,685906484 | 0,1561619 | 4,3922785 | 1,12E-05  | 0,0001142 | RAB20         |
| ENSGALG00000016123 | 816,29325 | 0,685692574 | 0,2096562 | 3,2705578 | 0,0010734 | 0,0056686 | TRPS1         |

|                    |           |             |           |           |           |           |              |
|--------------------|-----------|-------------|-----------|-----------|-----------|-----------|--------------|
| ENSGALG00000002204 | 670,70196 | 0,684953864 | 0,196026  | 3,4941984 | 0,0004755 | 0,0028759 | SLC7A4       |
| ENSGALG00000009444 | 276,54744 | 0,684544481 | 0,2525059 | 2,7110044 | 0,006708  | 0,0255466 | HHIPL2       |
| ENSGALG00000014559 | 1808,9059 | 0,684328525 | 0,1507966 | 4,5380898 | 5,68E-06  | 6,17E-05  | MEF2D        |
| ENSGALG00000016570 | 213,7613  | 0,684262758 | 0,2599004 | 2,6327884 | 0,0084687 | 0,0307881 |              |
| ENSGALG00000009075 | 1175,3212 | 0,683878573 | 0,1540118 | 4,44043   | 8,98E-06  | 9,38E-05  | CD99L2       |
| ENSGALG00000010770 | 1614,3878 | 0,683740122 | 0,1643769 | 4,159587  | 3,19E-05  | 0,0002801 | SCIN         |
| ENSGALG00000026269 | 172,06551 | 0,683345796 | 0,2809077 | 2,432635  | 0,0149894 | 0,0483604 | TAP1         |
| ENSGALG00000009523 | 834,57418 | 0,681144754 | 0,1860744 | 3,6606041 | 0,0002516 | 0,0016663 | CNTN1        |
| ENSGALG00000007251 | 3608,0883 | 0,681060329 | 0,121444  | 5,6080193 | 2,05E-08  | 3,82E-07  | PCYT2        |
| ENSGALG00000004341 | 261,34286 | 0,680949124 | 0,262149  | 2,5975655 | 0,0093887 | 0,0333927 |              |
| ENSGALG00000019702 | 11617,301 | 0,678512546 | 0,132661  | 5,1146335 | 3,14E-07  | 4,54E-06  | RP4-613B23.5 |
| ENSGALG00000000674 | 418,54848 | 0,67836471  | 0,2130129 | 3,1846173 | 0,0014495 | 0,00725   | MYO1D        |
| ENSGALG00000020688 | 589,72193 | 0,678030575 | 0,2132646 | 3,1792929 | 0,0014763 | 0,0073359 | CYP4B1L      |
| ENSGALG00000026986 | 1312,7721 | 0,67793682  | 0,1686465 | 4,0198699 | 5,82E-05  | 0,0004694 | KIAA1324     |
| ENSGALG00000004240 | 977,7105  | 0,676367039 | 0,1738198 | 3,8911964 | 9,98E-05  | 0,0007483 | ORAI1        |
| ENSGALG00000025764 | 5164,9467 | 0,675250138 | 0,1225181 | 5,5114325 | 3,56E-08  | 6,27E-07  | FKBP10       |
| ENSGALG00000002028 | 1196,673  | 0,675138088 | 0,1985373 | 3,4005596 | 0,0006725 | 0,0038438 | GPRC5B       |
| ENSGALG00000015425 | 550,05237 | 0,674783987 | 0,2346154 | 2,8761286 | 0,0040259 | 0,0167724 | LPL          |
| ENSGALG00000012583 | 448,70952 | 0,674342421 | 0,2079713 | 3,242479  | 0,0011849 | 0,0061506 | IDNK         |
| ENSGALG00000016471 | 262,57308 | 0,674081782 | 0,2520085 | 2,6748379 | 0,0074765 | 0,0278962 | NT5C1B       |
| ENSGALG00000021345 | 271,10964 | 0,673475888 | 0,2582429 | 2,6079164 | 0,0091095 | 0,0325699 | B3GNT9       |
| ENSGALG00000016399 | 1323,2505 | 0,673456474 | 0,1609458 | 4,1843685 | 2,86E-05  | 0,000255  | SNTB1        |
| ENSGALG00000004472 | 11283,073 | 0,672299012 | 0,1222317 | 5,5002025 | 3,79E-08  | 6,65E-07  | ASTN1        |
| ENSGALG00000005041 | 1267,2443 | 0,67175632  | 0,1650486 | 4,0700516 | 4,70E-05  | 0,0003893 | TMEM35       |
| ENSGALG00000011896 | 1990,3879 | 0,671754963 | 0,1334515 | 5,0337007 | 4,81E-07  | 6,71E-06  | SIDT2        |
| ENSGALG00000007038 | 2302,528  | 0,670533206 | 0,1352237 | 4,9586965 | 7,10E-07  | 9,50E-06  | ASTN2        |
| ENSGALG00000005069 | 1045,9472 | 0,669583836 | 0,1580685 | 4,2360364 | 2,27E-05  | 0,0002096 | PTGS2        |
| ENSGALG00000006700 | 425,17548 | 0,669478691 | 0,2185126 | 3,0637986 | 0,0021855 | 0,0101553 | PROSER2      |
| ENSGALG00000000040 | 692,57517 | 0,669045681 | 0,1867751 | 3,5820926 | 0,0003409 | 0,0021706 | FAM195A      |
| ENSGALG00000000920 | 727,43745 | 0,668851002 | 0,1978996 | 3,3797499 | 0,0007255 | 0,0041021 | CGN          |
| ENSGALG00000016415 | 1383,1065 | 0,668618298 | 0,1866966 | 3,581309  | 0,0003419 | 0,0021744 | MAP7D2       |
| ENSGALG00000002551 | 236,59495 | 0,667886193 | 0,2539141 | 2,6303623 | 0,0085294 | 0,0309591 | TTC18        |
| ENSGALG00000016617 | 4902,5535 | 0,667497538 | 0,1287787 | 5,1832934 | 2,18E-07  | 3,27E-06  | NCOA1        |
| ENSGALG00000008970 | 735,02263 | 0,666872911 | 0,1806417 | 3,6916889 | 0,0002228 | 0,0015    | NRK          |
| ENSGALG00000006449 | 910,14644 | 0,666661271 | 0,1961576 | 3,3985997 | 0,0006773 | 0,0038698 | GRIP2        |
| ENSGALG00000003736 | 312,42816 | 0,665332911 | 0,230427  | 2,8873912 | 0,0038845 | 0,0163183 | ABCB9        |
| ENSGALG00000007324 | 392,14542 | 0,66463294  | 0,2296182 | 2,8945136 | 0,0037975 | 0,0160169 | TP63         |
| ENSGALG00000003457 | 3064,2612 | 0,662964808 | 0,1431321 | 4,6318371 | 3,62E-06  | 4,14E-05  | CNP          |
| ENSGALG00000013766 | 661,355   | 0,662853472 | 0,1976254 | 3,35409   | 0,0007963 | 0,0044322 | DSEL         |
| ENSGALG00000008135 | 345,6592  | 0,662771473 | 0,2243246 | 2,9545197 | 0,0031316 | 0,0136305 | SATB2        |
| ENSGALG00000010316 | 7099,3915 | 0,662660688 | 0,1194525 | 5,5474833 | 2,90E-08  | 5,21E-07  | FRAS1        |
| ENSGALG00000016800 | 213,64071 | 0,662047446 | 0,2628994 | 2,5182536 | 0,0117938 | 0,0400432 | C2orf40      |
| ENSGALG00000006775 | 290,55417 | 0,661623797 | 0,267005  | 2,4779452 | 0,0132141 | 0,0438272 | TGM2         |
| ENSGALG00000002775 | 509,11695 | 0,661278251 | 0,2056466 | 3,2156052 | 0,0013017 | 0,0066526 | FA2H         |
| ENSGALG00000012710 | 1279,2972 | 0,660750331 | 0,1586684 | 4,1643484 | 3,12E-05  | 0,000275  | NCS1         |
| ENSGALG00000023708 | 346,0463  | 0,660417389 | 0,226761  | 2,9123934 | 0,0035867 | 0,0152699 | UBXN10       |
| ENSGALG00000018815 | 410,19043 | 0,659828915 | 0,2173041 | 3,0364305 | 0,002394  | 0,0109266 | PCGF2        |
| ENSGALG00000006236 | 481,20913 | 0,65916962  | 0,2166125 | 3,0430824 | 0,0023417 | 0,0107419 | TPH1         |
| ENSGALG00000016411 | 1960,7449 | 0,657856223 | 0,1571317 | 4,1866556 | 2,83E-05  | 0,0002527 | COL14A1      |
| ENSGALG00000006152 | 1208,2078 | 0,657637784 | 0,1593989 | 4,125736  | 3,70E-05  | 0,0003172 |              |
| ENSGALG00000025698 | 1218,1933 | 0,657354664 | 0,227163  | 2,8937581 | 0,0038066 | 0,0160455 |              |
| ENSGALG00000018967 | 1911,6852 | 0,656123394 | 0,1849185 | 3,5481766 | 0,0003879 | 0,0024149 | LYN          |
| ENSGALG00000016543 | 3236,9117 | 0,654951402 | 0,1701332 | 3,8496396 | 0,0001183 | 0,000864  | NHS          |
| ENSGALG00000010732 | 284,29764 | 0,654838117 | 0,2441236 | 2,6824038 | 0,0073095 | 0,027378  | GALNTL6      |
| ENSGALG00000009473 | 257,7395  | 0,654742804 | 0,2591149 | 2,5268436 | 0,0115093 | 0,0392335 | EFCAB1       |
| ENSGALG00000012092 | 321,27125 | 0,654654529 | 0,2674895 | 2,4474025 | 0,014389  | 0,046778  | ESYT3        |
| ENSGALG00000012023 | 986,86948 | 0,654468757 | 0,1614892 | 4,0527095 | 5,06E-05  | 0,000416  | DACT1        |
| ENSGALG00000003845 | 2106,1901 | 0,653837192 | 0,1371393 | 4,7676855 | 1,86E-06  | 2,26E-05  | MKNK2        |
| ENSGALG00000006676 | 521,68608 | 0,652541968 | 0,2289326 | 2,8503676 | 0,0043669 | 0,0179081 | RLBP1        |
| ENSGALG00000003589 | 5654,7984 | 0,652278144 | 0,1207315 | 5,4027172 | 6,56E-08  | 1,10E-06  | VTN          |
| ENSGALG00000001426 | 1341,2118 | 0,651807691 | 0,1484727 | 4,3900856 | 1,13E-05  | 0,0001152 | MECR         |
| ENSGALG00000002403 | 2862,6989 | 0,651643976 | 0,1530067 | 4,2589243 | 2,05E-05  | 0,0001919 | ULK1         |

|                     |           |             |           |           |           |           |              |
|---------------------|-----------|-------------|-----------|-----------|-----------|-----------|--------------|
| ENSGALG00000001956  | 2538,005  | 0,650817237 | 0,1761305 | 3,6950845 | 0,0002198 | 0,001483  | OLFML3       |
| ENSGALG000000014225 | 320,24798 | 0,65009587  | 0,2560628 | 2,5388138 | 0,0111229 | 0,0382613 | KCTD8        |
| ENSGALG000000008120 | 6095,8052 | 0,649872522 | 0,1262195 | 5,1487478 | 2,62E-07  | 3,86E-06  | TLE3         |
| ENSGALG000000024104 | 1479,6002 | 0,64969951  | 0,1504929 | 4,3171453 | 1,58E-05  | 0,0001528 |              |
| ENSGALG000000005145 | 354,77662 | 0,64926713  | 0,2184796 | 2,9717518 | 0,0029611 | 0,0130342 | SS18L1       |
| ENSGALG000000024488 | 3112,8373 | 0,649250333 | 0,1855727 | 3,4986306 | 0,0004677 | 0,0028349 | CD99         |
| ENSGALG000000008763 | 548,60866 | 0,64905793  | 0,2030908 | 3,1959002 | 0,001394  | 0,0070213 | SSX2IP       |
| ENSGALG000000007090 | 354,84899 | 0,648812032 | 0,2646101 | 2,4519552 | 0,0142082 | 0,0463564 | CPN1         |
| ENSGALG000000008780 | 291,63944 | 0,648139707 | 0,2519098 | 2,5729041 | 0,0100849 | 0,0354064 | CTBS         |
| ENSGALG000000007848 | 1247,6356 | 0,647083546 | 0,1839624 | 3,5174772 | 0,0004357 | 0,0026671 | PTS          |
| ENSGALG000000010422 | 5513,2698 | 0,646628908 | 0,1246783 | 5,1863789 | 2,14E-07  | 3,22E-06  | FEZ1         |
| ENSGALG000000010719 | 1138,2128 | 0,646215963 | 0,1598376 | 4,0429522 | 5,28E-05  | 0,0004319 | NEIL3        |
| ENSGALG000000006036 | 6926,7297 | 0,644947298 | 0,1418361 | 4,547131  | 5,44E-06  | 5,94E-05  |              |
| ENSGALG000000003655 | 1118,2527 | 0,643488267 | 0,1848793 | 3,4805866 | 0,0005003 | 0,0030021 | GAS2         |
| ENSGALG000000000402 | 743,97016 | 0,642116084 | 0,180432  | 3,5587699 | 0,0003726 | 0,0023388 | LOXL2        |
| ENSGALG000000006947 | 23413,053 | 0,64187784  | 0,1108573 | 5,7901257 | 7,03E-09  | 1,43E-07  | BDH1         |
| ENSGALG000000003568 | 441,24282 | 0,640936632 | 0,2094653 | 3,0598708 | 0,0022143 | 0,0102684 | PPP1R16B     |
| ENSGALG000000011335 | 567,87108 | 0,64086738  | 0,205863  | 3,113077  | 0,0018515 | 0,0088263 | NHEJ1        |
| ENSGALG000000008479 | 572,78152 | 0,640276298 | 0,2217437 | 2,8874605 | 0,0038837 | 0,0163183 | PLEKHM3      |
| ENSGALG000000026159 | 2624,117  | 0,639768169 | 0,1366904 | 4,6804192 | 2,86E-06  | 3,34E-05  | PDLIM7       |
| ENSGALG000000004074 | 504,98036 | 0,63919781  | 0,2089342 | 3,0593254 | 0,0022184 | 0,0102792 | KCNS1        |
| ENSGALG000000026295 | 3751,1713 | 0,638993968 | 0,1256122 | 5,0870391 | 3,64E-07  | 5,19E-06  | CDR2L        |
| ENSGALG000000000935 | 1038,8243 | 0,638135684 | 0,1951826 | 3,2694289 | 0,0010776 | 0,0056891 | TUFT1        |
| ENSGALG000000009478 | 877,18337 | 0,637933371 | 0,2202594 | 2,8962816 | 0,0037761 | 0,0159566 | BCHE         |
| ENSGALG000000028506 | 1185,606  | 0,637581477 | 0,166917  | 3,8197523 | 0,0001336 | 0,0009649 |              |
| ENSGALG000000003527 | 1639,1106 | 0,636215476 | 0,1470878 | 4,3254142 | 1,52E-05  | 0,0001482 | ARRDC2       |
| ENSGALG000000028756 | 1081,2256 | 0,636133999 | 0,1663302 | 3,8245244 | 0,000131  | 0,0009474 | SLC4A2       |
| ENSGALG000000004585 | 1609,3421 | 0,634633954 | 0,1652199 | 3,841147  | 0,0001225 | 0,0008907 | SLC29A3      |
| ENSGALG000000020726 | 246,91021 | 0,63266925  | 0,2559148 | 2,4721867 | 0,0134289 | 0,0443774 | PDZD7        |
| ENSGALG000000008057 | 2849,9643 | 0,63255389  | 0,1469667 | 4,3040624 | 1,68E-05  | 0,0001609 | LLGL2        |
| ENSGALG000000011053 | 10065,657 | 0,630484727 | 0,107695  | 5,8543543 | 4,79E-09  | 1,01E-07  | HOXA2        |
| ENSGALG000000008151 | 5862,8164 | 0,629127593 | 0,1186504 | 5,3023621 | 1,14E-07  | 1,81E-06  | WSB2         |
| ENSGALG000000027658 | 594,25398 | 0,628365542 | 0,1906089 | 3,2966228 | 0,0009785 | 0,005237  | TESK1        |
| ENSGALG000000002664 | 1165,5467 | 0,627944771 | 0,1531652 | 4,0997864 | 4,14E-05  | 0,0003505 | ANXA11       |
| ENSGALG000000029000 | 1142,4251 | 0,627547484 | 0,158422  | 3,9612397 | 7,46E-05  | 0,0005808 | HYAL3        |
| ENSGALG000000028204 | 8948,3531 | 0,626531339 | 0,1218206 | 5,1430676 | 2,70E-07  | 3,97E-06  | GPX1         |
| ENSGALG000000001100 | 796,40837 | 0,626475621 | 0,1802096 | 3,4763714 | 0,0005082 | 0,0030393 | ST3GAL4      |
| ENSGALG000000002313 | 2718,417  | 0,626374122 | 0,1346423 | 4,6521335 | 3,29E-06  | 3,79E-05  | SLC38A7      |
| ENSGALG000000016745 | 455,542   | 0,625941712 | 0,2478958 | 2,5250189 | 0,0115692 | 0,0393984 | GABRB3       |
| ENSGALG000000026762 | 1809,4015 | 0,625670937 | 0,1367941 | 4,5738152 | 4,79E-06  | 5,34E-05  | WBSCR27      |
| ENSGALG000000008728 | 894,54762 | 0,625207283 | 0,1707065 | 3,6624697 | 0,0002498 | 0,0016558 | PTER         |
| ENSGALG000000011856 | 1033,6518 | 0,624422163 | 0,1575632 | 3,9629959 | 7,40E-05  | 0,0005778 | C7orf55      |
| ENSGALG000000007267 | 4451,8628 | 0,623851268 | 0,1170233 | 5,3309986 | 9,77E-08  | 1,57E-06  | MVD          |
| ENSGALG000000014890 | 1413,3331 | 0,620763059 | 0,1462687 | 4,2439922 | 2,20E-05  | 0,0002031 | TNFRSF1A     |
| ENSGALG000000000426 | 554,75724 | 0,620684473 | 0,1991349 | 3,1169053 | 0,0018276 | 0,0087369 | IGSF21       |
| ENSGALG000000006114 | 909,8822  | 0,61972927  | 0,1710742 | 3,6225768 | 0,0002917 | 0,0018965 |              |
| ENSGALG000000016595 | 534,98984 | 0,618865991 | 0,2042    | 3,0306858 | 0,00244   | 0,0111031 | TRIM35       |
| ENSGALG000000011900 | 1365,0771 | 0,61861917  | 0,1798125 | 3,440356  | 0,0005809 | 0,0033976 | NAGA         |
| ENSGALG000000007076 | 2564,3514 | 0,617550884 | 0,1437626 | 4,2956288 | 1,74E-05  | 0,0001663 | CCNY         |
| ENSGALG000000016934 | 244,09661 | 0,616949085 | 0,2531836 | 2,4367659 | 0,0148193 | 0,0479038 | PCDH20       |
| ENSGALG000000014561 | 290,72868 | 0,616417234 | 0,2372422 | 2,5982612 | 0,0093697 | 0,0333426 | PTPN6        |
| ENSGALG000000007647 | 329,01065 | 0,615818159 | 0,2520071 | 2,443654  | 0,0145394 | 0,0471767 | MYO3A        |
| ENSGALG000000007381 | 1220,4425 | 0,615500074 | 0,1553201 | 3,9627846 | 7,41E-05  | 0,000578  | SERPING1     |
| ENSGALG000000028543 | 1301,4945 | 0,614319385 | 0,1647996 | 3,7276752 | 0,0001933 | 0,0013256 | FGFR4        |
| ENSGALG000000015734 | 903,95178 | 0,61429478  | 0,1983985 | 3,0962669 | 0,0019597 | 0,0092839 | ZC2HC1A      |
| ENSGALG000000016728 | 5650,4017 | 0,613362339 | 0,115156  | 5,3263591 | 1,00E-07  | 1,61E-06  | RP2          |
| ENSGALG000000023881 | 330,14663 | 0,612305207 | 0,2457805 | 2,4912681 | 0,0127288 | 0,0425491 | PLXDC1       |
| ENSGALG000000016092 | 954,71804 | 0,611645343 | 0,1643983 | 3,720508  | 0,0001988 | 0,0013569 | RAB11FIP5    |
| ENSGALG000000011975 | 2830,8254 | 0,61116717  | 0,1227563 | 4,9787019 | 6,40E-07  | 8,65E-06  | FBXL2        |
| ENSGALG000000014699 | 806,27033 | 0,610005378 | 0,2334147 | 2,6133976 | 0,0089647 | 0,0321873 | MEGF10       |
| ENSGALG000000012495 | 822,21166 | 0,608707981 | 0,2014447 | 3,0217131 | 0,0025135 | 0,0113541 | Q9DEH4_CHICK |
| ENSGALG000000016143 | 5447,091  | 0,607480677 | 0,1713253 | 3,5457739 | 0,0003915 | 0,0024359 | RHPN1        |

|                    |           |             |           |           |           |           |            |
|--------------------|-----------|-------------|-----------|-----------|-----------|-----------|------------|
| ENSGALG00000004103 | 351,09074 | 0,607102605 | 0,2488829 | 2,4393098 | 0,0147153 | 0,0476455 | FAM81A     |
| ENSGALG00000008512 | 665,49717 | 0,606896507 | 0,1931945 | 3,141375  | 0,0016816 | 0,0081679 | GRIA3      |
| ENSGALG00000008272 | 1496,8242 | 0,6063144   | 0,1570984 | 3,8594554 | 0,0001136 | 0,0008363 | TMED3      |
| ENSGALG00000012934 | 686,11794 | 0,606004522 | 0,2092753 | 2,8957294 | 0,0037828 | 0,0159748 | BICD1      |
| ENSGALG00000016071 | 698,48269 | 0,605474788 | 0,1980237 | 3,0575882 | 0,0022313 | 0,0103145 | CTHRC1     |
| ENSGALG00000015414 | 1285,1197 | 0,605396806 | 0,1804212 | 3,3554643 | 0,0007923 | 0,0044138 | NSUN3      |
| ENSGALG00000002930 | 5292,4924 | 0,603605896 | 0,1376656 | 4,3845818 | 1,16E-05  | 0,0001178 | STX7       |
| ENSGALG00000005303 | 729,47439 | 0,603106981 | 0,1827363 | 3,3004217 | 0,0009654 | 0,005187  | CCDC13     |
| ENSGALG00000006742 | 8579,7495 | 0,60288418  | 0,1075096 | 5,6077227 | 2,05E-08  | 3,82E-07  | NECTIN1    |
| ENSGALG00000013964 | 1158,3447 | 0,602864404 | 0,163189  | 3,6942711 | 0,0002205 | 0,0014863 | SPATA18    |
| ENSGALG00000015075 | 452,11233 | 0,602809512 | 0,2158206 | 2,7931043 | 0,0052205 | 0,0207767 |            |
| ENSGALG00000000608 | 482,47931 | 0,60269407  | 0,1990068 | 3,0285101 | 0,0024576 | 0,0111684 | CDH1       |
| ENSGALG00000000739 | 566,84692 | 0,602546305 | 0,188602  | 3,1948037 | 0,0013993 | 0,0070455 | XKR8       |
| ENSGALG00000009047 | 3574,1219 | 0,601534497 | 0,1392573 | 4,3195906 | 1,56E-05  | 0,0001517 | YPEL5      |
| ENSGALG00000005628 | 1589,6542 | 0,601333554 | 0,1810639 | 3,3211128 | 0,0008966 | 0,0048849 | COL9A3     |
| ENSGALG00000029021 | 4810,2675 | 0,600451025 | 0,1243158 | 4,830046  | 1,37E-06  | 1,72E-05  | CACNA2D2   |
| ENSGALG00000023435 | 807,96294 | 0,600270173 | 0,1899681 | 3,1598469 | 0,0015785 | 0,0077671 | GATM       |
| ENSGALG00000028023 | 391,94362 | 0,598578703 | 0,2158662 | 2,7729159 | 0,0055556 | 0,0219007 | C14ORF166B |
| ENSGALG00000023876 | 5804,1712 | 0,598475769 | 0,1258285 | 4,7562796 | 1,97E-06  | 2,38E-05  | PRKCQ      |
| ENSGALG00000016330 | 507,71021 | 0,598164421 | 0,2008484 | 2,9781891 | 0,0028996 | 0,0128091 | ANGPT2     |
| ENSGALG00000008475 | 1732,9827 | 0,598095279 | 0,145561  | 4,1088979 | 3,98E-05  | 0,0003394 | ARRDC1     |
| ENSGALG00000013167 | 14635,204 | 0,597899753 | 0,1179107 | 5,0707829 | 3,96E-07  | 5,61E-06  | SDHA       |
| ENSGALG00000007801 | 1966,8829 | 0,597201094 | 0,1460776 | 4,0882463 | 4,35E-05  | 0,0003633 | CORO7      |
| ENSGALG00000027450 | 1958,1012 | 0,596865465 | 0,1360214 | 4,3880272 | 1,14E-05  | 0,000116  |            |
| ENSGALG00000005839 | 281,11607 | 0,595553706 | 0,2359627 | 2,5239319 | 0,011605  | 0,0394908 | ARID3C     |
| ENSGALG00000002818 | 12498,951 | 0,595523293 | 0,1252741 | 4,7537617 | 2,00E-06  | 2,41E-05  | VAT1       |
| ENSGALG00000015399 | 371,45534 | 0,595444245 | 0,2198201 | 2,7087794 | 0,0067531 | 0,0256826 | FUT10      |
| ENSGALG00000008285 | 2205,3966 | 0,594659875 | 0,1335709 | 4,4520161 | 8,51E-06  | 8,94E-05  | NAPEPLD    |
| ENSGALG00000026756 | 608,70147 | 0,593058479 | 0,1859613 | 3,1891498 | 0,0014269 | 0,0071635 |            |
| ENSGALG00000022661 | 267,36767 | 0,593055191 | 0,2440949 | 2,429609  | 0,0151151 | 0,0486392 |            |
| ENSGALG00000011145 | 3513,1587 | 0,5922185   | 0,1195159 | 4,9551454 | 7,23E-07  | 9,63E-06  | TRIL       |
| ENSGALG00000026180 | 4122,3044 | 0,591162305 | 0,1425421 | 4,1472816 | 3,36E-05  | 0,0002933 | MSX2       |
| ENSGALG00000005999 | 5083,9087 | 0,591144605 | 0,1218787 | 4,8502694 | 1,23E-06  | 1,57E-05  | ABTB1      |
| ENSGALG00000004596 | 540,83556 | 0,59090413  | 0,1964513 | 3,0078909 | 0,0026307 | 0,0118051 | AR         |
| ENSGALG00000013436 | 9895,6737 | 0,590008237 | 0,1280495 | 4,6076575 | 4,07E-06  | 4,58E-05  | TET3       |
| ENSGALG00000013742 | 6102,599  | 0,589905166 | 0,1472857 | 4,0051753 | 6,20E-05  | 0,0004943 | EZR        |
| ENSGALG00000025745 | 2020,2184 | 0,589609597 | 0,1655708 | 3,5610734 | 0,0003693 | 0,0023216 | ARHGAP27   |
| ENSGALG00000026081 | 3861,3662 | 0,588777417 | 0,1223416 | 4,8125694 | 1,49E-06  | 1,86E-05  | RBM38      |
| ENSGALG00000013882 | 324,83067 | 0,587886739 | 0,2342948 | 2,5091749 | 0,0121014 | 0,0408428 | MXD1       |
| ENSGALG00000000464 | 6973,1204 | 0,587838297 | 0,1100043 | 5,3437778 | 9,10E-08  | 1,48E-06  | RHOBTB2    |
| ENSGALG00000004900 | 814,58968 | 0,587812156 | 0,240363  | 2,4455181 | 0,0144644 | 0,0469671 | FAM101B    |
| ENSGALG00000005102 | 2254,4611 | 0,58732124  | 0,1676607 | 3,503035  | 0,00046   | 0,0027934 | CDH4       |
| ENSGALG00000016594 | 1080,5684 | 0,58674351  | 0,1703086 | 3,4451783 | 0,0005707 | 0,0033462 | FRMPD4     |
| ENSGALG00000010934 | 813,60176 | 0,586239182 | 0,1706421 | 3,4354907 | 0,0005915 | 0,0034503 | INADL      |
| ENSGALG00000025822 | 1186,6239 | 0,586217768 | 0,1900116 | 3,0851675 | 0,0020344 | 0,0095808 | CYP1B1     |
| ENSGALG00000017558 | 835,37967 | 0,585776262 | 0,1728652 | 3,3886308 | 0,0007024 | 0,0039883 |            |
| ENSGALG00000000407 | 552,43307 | 0,58498369  | 0,2033571 | 2,876632  | 0,0040194 | 0,0167507 |            |
| ENSGALG00000002169 | 5307,0492 | 0,58477373  | 0,1393007 | 4,1979236 | 2,69E-05  | 0,0002424 | PLEKHB2    |
| ENSGALG00000016108 | 377,17299 | 0,58441259  | 0,2150799 | 2,7171887 | 0,0065839 | 0,0251303 | SYBU       |
| ENSGALG00000025738 | 2313,9355 | 0,584187633 | 0,1378228 | 4,2386855 | 2,25E-05  | 0,0002075 | RHOU       |
| ENSGALG00000028942 | 551,36062 | 0,584183813 | 0,2020534 | 2,8912352 | 0,0038373 | 0,0161649 | ZBTB25     |
| ENSGALG00000015938 | 2888,9851 | 0,583396297 | 0,1447547 | 4,0302413 | 5,57E-05  | 0,0004524 | IFNAR2     |
| ENSGALG00000001574 | 3769,6924 | 0,583342794 | 0,1296384 | 4,499767  | 6,80E-06  | 7,24E-05  | MLLT6      |
| ENSGALG00000014242 | 1647,3047 | 0,583190799 | 0,1556527 | 3,7467429 | 0,0001791 | 0,0012457 | BEND4      |
| ENSGALG00000008999 | 3276,8472 | 0,583129446 | 0,1551657 | 3,7581073 | 0,0001712 | 0,001199  | AFAP1L2    |
| ENSGALG00000010706 | 6618,9625 | 0,582943162 | 0,1129494 | 5,161101  | 2,46E-07  | 3,64E-06  | TENM3      |
| ENSGALG00000015952 | 611,25698 | 0,582757747 | 0,2345109 | 2,4849925 | 0,0129554 | 0,0431161 | B3GAT2     |
| ENSGALG00000004844 | 6201,28   | 0,581688828 | 0,1476751 | 3,9389777 | 8,18E-05  | 0,0006305 | SEMA6D     |
| ENSGALG00000009604 | 5450,2438 | 0,581479374 | 0,1323792 | 4,392529  | 1,12E-05  | 0,0001142 | DBX2       |
| ENSGALG00000001446 | 6585,1604 | 0,581431635 | 0,1501068 | 3,8734532 | 0,0001073 | 0,0007966 | GSN        |
| ENSGALG00000023768 | 4728,0275 | 0,58136874  | 0,1164642 | 4,9918245 | 5,98E-07  | 8,14E-06  | EPHA2      |
| ENSGALG00000002707 | 937,59842 | 0,58133458  | 0,1802757 | 3,2246966 | 0,0012611 | 0,0064766 | CHRNA2     |

|                    |           |             |            |           |           |           |              |
|--------------------|-----------|-------------|------------|-----------|-----------|-----------|--------------|
| ENSGALG00000029020 | 1577,3992 | 0,581217481 | 0,1719893  | 3,3793821 | 0,0007265 | 0,0041059 | PPAPDC1A     |
| ENSGALG00000028478 | 1030,9127 | 0,580829913 | 0,1824278  | 3,1838898 | 0,0014531 | 0,0072578 | CELF3        |
| ENSGALG00000007531 | 904,34237 | 0,57752222  | 0,1731776  | 3,3348561 | 0,0008534 | 0,0046815 | ZFYVE27      |
| ENSGALG00000006054 | 759,82179 | 0,576882549 | 0,1820676  | 3,1685082 | 0,0015322 | 0,0075694 | CALCA        |
| ENSGALG00000022926 | 4686,6657 | 0,576442566 | 0,1261533  | 4,569381  | 4,89E-06  | 5,45E-05  | GPR162       |
| ENSGALG00000013185 | 3965,0445 | 0,575558846 | 0,1485635  | 3,8741602 | 0,000107  | 0,0007965 | PITPNM1      |
| ENSGALG00000000869 | 855,33376 | 0,574690811 | 0,1735124  | 3,3121031 | 0,000926  | 0,0050248 | ZDHHC18      |
| ENSGALG00000006885 | 6383,5426 | 0,574664846 | 0,1264083  | 4,5461019 | 5,46E-06  | 5,96E-05  | HRAS         |
| ENSGALG00000017150 | 518,06641 | 0,574401936 | 0,1974777  | 2,9086925 | 0,0036294 | 0,0154277 | ARHGAP20     |
| ENSGALG00000015110 | 438,79213 | 0,573807714 | 0,2198442  | 2,6100658 | 0,0090525 | 0,0324512 | FAM189A2     |
| ENSGALG00000015136 | 2417,8066 | 0,573614313 | 0,1609296  | 3,5643815 | 0,0003647 | 0,0022957 | ILDR1        |
| ENSGALG00000015744 | 3529,1332 | 0,573305804 | 0,1255432  | 4,5666009 | 4,96E-06  | 5,50E-05  | RP11-26J3.4  |
| ENSGALG00000001489 | 8334,3262 | 0,572451499 | 0,129456   | 4,4219762 | 9,78E-06  | 0,000101  | SSU72        |
| ENSGALG00000014911 | 1071,9721 | 0,572338387 | 0,1572272  | 3,6402005 | 0,0002724 | 0,0017824 | ARL15        |
| ENSGALG00000015351 | 2719,2778 | 0,572206068 | 0,1704231  | 3,357561  | 0,0007863 | 0,0043931 | CBLB         |
| ENSGALG00000025818 | 8546,9056 | 0,571475138 | 0,109953   | 5,1974483 | 2,02E-07  | 3,06E-06  | KCNK5        |
| ENSGALG00000005549 | 1034,7545 | 0,569387138 | 0,1561531  | 3,6463379 | 0,000266  | 0,0017479 | CUEDC1       |
| ENSGALG00000024153 | 1062,2502 | 0,56872295  | 0,170972   | 3,326409  | 0,0008797 | 0,0048083 | NLRX1        |
| ENSGALG00000000186 | 787,09326 | 0,568415238 | 0,1771285  | 3,2090555 | 0,0013317 | 0,006773  | MTCH1        |
| ENSGALG00000001146 | 1103,9797 | 0,568231367 | 0,1686686  | 3,3689227 | 0,0007546 | 0,0042333 | UBXN6        |
| ENSGALG00000026471 | 418,38308 | 0,568003242 | 0,2176763  | 2,6093938 | 0,0090703 | 0,0324722 | CRIP2        |
| ENSGALG00000009403 | 580,12466 | 0,567910527 | 0,2061904  | 2,7543016 | 0,0058818 | 0,02288   | GRK5         |
| ENSGALG00000012788 | 1309,5248 | 0,567748724 | 0,1613363  | 3,5190387 | 0,0004331 | 0,0026598 | PARP12       |
| ENSGALG00000026703 | 524,51341 | 0,567716959 | 0,1939681  | 2,926857  | 0,0034241 | 0,0146738 | SLC2A4RG     |
| ENSGALG00000027275 | 1081,3036 | 0,567504466 | 0,2139281  | 2,6527819 | 0,0079831 | 0,0293917 | PPP1R3B      |
| ENSGALG00000008682 | 380,85967 | 0,566238069 | 0,2325764  | 2,4346325 | 0,0149069 | 0,0481399 | SLC25A43     |
| ENSGALG00000009880 | 899,08782 | 0,565731325 | 0,2142452  | 2,6405788 | 0,0082765 | 0,0302345 | INPP4B       |
| ENSGALG00000006873 | 2079,2766 | 0,565449117 | 0,1310751  | 4,3139312 | 1,60E-05  | 0,0001546 | RASSF7       |
| ENSGALG00000007358 | 319,01574 | 0,565211229 | 0,2295584  | 2,462168  | 0,01381   | 0,0452631 | CILP         |
| ENSGALG00000007093 | 1910,9478 | 0,563647311 | 0,1531316  | 3,6808026 | 0,0002325 | 0,0015558 | CYTH1        |
| ENSGALG00000002778 | 10757,974 | 0,563240809 | 0,1099995  | 5,1203932 | 3,05E-07  | 4,42E-06  | C6orf106     |
| ENSGALG00000028605 | 2035,8396 | 0,561167945 | 0,1578097  | 3,5559782 | 0,0003766 | 0,0023562 | CRELD1       |
| ENSGALG00000001478 | 436,63763 | 0,560376671 | 0,2038738  | 2,7486445 | 0,0059842 | 0,0232189 |              |
| ENSGALG00000002681 | 1896,5953 | 0,559637304 | 0,1492264  | 3,750257  | 0,0001767 | 0,0012328 | HSD17B7      |
| ENSGALG00000008416 | 491,34771 | 0,559354461 | 0,2224807  | 2,5141709 | 0,0119313 | 0,040409  | CFAP61       |
| ENSGALG00000016152 | 7208,3385 | 0,558712272 | 0,1259225  | 4,4369523 | 9,12E-06  | 9,51E-05  | LY6E         |
| ENSGALG00000021079 | 356,52842 | 0,558275751 | 0,2206598  | 2,5300293 | 0,0114053 | 0,0389865 | RGS19        |
| ENSGALG00000010307 | 1309,92   | 0,558082008 | 0,160225   | 3,4831137 | 0,0004956 | 0,0029792 | ACYP1        |
| ENSGALG00000007997 | 607,00115 | 0,557958539 | 0,1934786  | 2,883826  | 0,0039288 | 0,0164585 | ACCS         |
| ENSGALG00000011604 | 1003,2775 | 0,557581352 | 0,1841576  | 3,0277409 | 0,0024639 | 0,0111932 | SLC4A4       |
| ENSGALG00000010614 | 5022,3744 | 0,557460992 | 0,1255639  | 4,4396588 | 9,01E-06  | 9,41E-05  | SLC25A4      |
| ENSGALG00000001682 | 1516,3508 | 0,557286636 | 0,150105   | 3,712645  | 0,0002051 | 0,0013949 | FBXL20       |
| ENSGALG00000001238 | 3616,0144 | 0,556401234 | 0,1285764  | 4,3273971 | 1,51E-05  | 0,0001475 | STX8         |
| ENSGALG00000002286 | 73998,022 | 0,555324016 | 0,11110271 | 5,0016995 | 5,68E-07  | 7,79E-06  | H3F3C        |
| ENSGALG00000025787 | 2442,8908 | 0,554206894 | 0,1300356  | 4,2619625 | 2,03E-05  | 0,0001895 | CDK5RAP3     |
| ENSGALG00000004849 | 4017,8273 | 0,553445556 | 0,1159402  | 4,7735421 | 1,81E-06  | 2,21E-05  | WSCD2        |
| ENSGALG00000013929 | 1086,8441 | 0,552883419 | 0,2064792  | 2,6776709 | 0,0074136 | 0,0277069 | PDGFRA       |
| ENSGALG00000001766 | 1421,2057 | 0,552758547 | 0,1737186  | 3,1819197 | 0,001463  | 0,0072892 | RNF165       |
| ENSGALG00000005377 | 707,88046 | 0,551995057 | 0,1867603  | 2,9556343 | 0,0031203 | 0,0135944 | WWOX         |
| ENSGALG00000023025 | 647,83568 | 0,551042888 | 0,1904818  | 2,8928903 | 0,0038171 | 0,0160849 | ZBTB42       |
| ENSGALG00000010982 | 4422,5508 | 0,55035484  | 0,1393577  | 3,9492248 | 7,84E-05  | 0,0006062 | NID1         |
| ENSGALG00000000316 | 1699,5534 | 0,549437781 | 0,1376171  | 3,9925111 | 6,54E-05  | 0,0005177 | PKNOX2       |
| ENSGALG00000027194 | 1293,5716 | 0,548094206 | 0,1517129  | 3,6127065 | 0,000303  | 0,001959  | PMVK         |
| ENSGALG00000016166 | 3894,3455 | 0,547970517 | 0,1393864  | 3,9313064 | 8,45E-05  | 0,0006489 | SLC45A4      |
| ENSGALG00000006663 | 9717,8185 | 0,547489923 | 0,1171093  | 4,6750332 | 2,94E-06  | 3,41E-05  | ARHGEF12     |
| ENSGALG00000009092 | 736,78214 | 0,546285921 | 0,1858557  | 2,9393012 | 0,0032895 | 0,0141776 | GTF2A1L      |
| ENSGALG00000001966 | 2313,195  | 0,545673399 | 0,1456394  | 3,7467418 | 0,0001791 | 0,0012457 | RP11-106M3.5 |
| ENSGALG00000001864 | 1163,993  | 0,545343287 | 0,1686132  | 3,2342865 | 0,0012195 | 0,006301  | C9orf72      |
| ENSGALG00000003201 | 647,35709 | 0,545148693 | 0,199247   | 2,7360447 | 0,0062183 | 0,0239563 | RP11-5A19.5  |
| ENSGALG00000006598 | 2327,6663 | 0,544504824 | 0,1375901  | 3,9574412 | 7,58E-05  | 0,0005879 | SORL1        |
| ENSGALG00000004272 | 762,39975 | 0,543009602 | 0,1799766  | 3,017113  | 0,0025519 | 0,0114973 | ASB1         |
| ENSGALG00000015107 | 1737,1601 | 0,542439326 | 0,135653   | 3,9987266 | 6,37E-05  | 0,0005065 | PIP5K1B      |



|                     |           |             |           |           |           |           |             |
|---------------------|-----------|-------------|-----------|-----------|-----------|-----------|-------------|
| ENSGALG00000008860  | 2251,9145 | 0,541261109 | 0,1571898 | 3,4433603 | 0,0005745 | 0,0033644 | LONRF3      |
| ENSGALG00000004438  | 432,7024  | 0,540948656 | 0,2158033 | 2,5066749 | 0,0121873 | 0,0410717 | ARSB        |
| ENSGALG00000005315  | 1118,2152 | 0,540760838 | 0,1598616 | 3,3826823 | 0,0007178 | 0,0040636 | RPUSD1      |
| ENSGALG00000004033  | 1001,8846 | 0,540669975 | 0,1647104 | 3,2825495 | 0,0010287 | 0,0054647 | GALNT10     |
| ENSGALG000000016176 | 404,69822 | 0,540238641 | 0,2176628 | 2,4819979 | 0,0130648 | 0,0434589 | BAI3        |
| ENSGALG000000022713 | 4245,7427 | 0,539793648 | 0,1498998 | 3,6010297 | 0,000317  | 0,0020356 | FAM181B     |
| ENSGALG000000025800 | 976,78159 | 0,538353026 | 0,1626794 | 3,3092876 | 0,0009353 | 0,0050615 |             |
| ENSGALG000000028513 | 5510,2985 | 0,53711532  | 0,1123093 | 4,7824632 | 1,73E-06  | 2,12E-05  | TMUB1       |
| ENSGALG000000026466 | 809,72654 | 0,537047161 | 0,1854082 | 2,8965663 | 0,0037727 | 0,015947  |             |
| ENSGALG000000015437 | 3953,661  | 0,536831128 | 0,1328102 | 4,0420929 | 5,30E-05  | 0,0004329 | MPC2        |
| ENSGALG000000024049 | 660,99489 | 0,536773384 | 0,1891289 | 2,8381347 | 0,0045378 | 0,0184744 | RAB33A      |
| ENSGALG000000029027 | 627,86616 | 0,53597017  | 0,182674  | 2,9340251 | 0,003346  | 0,0143844 |             |
| ENSGALG00000007389  | 2084,8413 | 0,53455468  | 0,1327207 | 4,0276668 | 5,63E-05  | 0,0004565 | ANKRD40     |
| ENSGALG000000021313 | 982,25761 | 0,534412472 | 0,180088  | 2,9675073 | 0,0030023 | 0,0131729 | PDGFRB      |
| ENSGALG000000016037 | 768,10735 | 0,532870331 | 0,1779289 | 2,9948499 | 0,0027458 | 0,0122611 | SPAG1       |
| ENSGALG000000009805 | 563,53778 | 0,53211751  | 0,1982743 | 2,6837437 | 0,0072803 | 0,0272932 | PPM1H       |
| ENSGALG000000026039 | 442,77163 | 0,531809088 | 0,2097706 | 2,5351933 | 0,0112385 | 0,0385811 |             |
| ENSGALG000000016167 | 2827,4394 | 0,530005093 | 0,1278741 | 4,1447408 | 3,40E-05  | 0,0002958 | DENND3      |
| ENSGALG000000027498 | 3720,6236 | 0,529700401 | 0,1865582 | 2,8393312 | 0,0045208 | 0,0184174 | FOXB1       |
| ENSGALG000000023189 | 809,88073 | 0,529094048 | 0,1674238 | 3,1602079 | 0,0015766 | 0,0077603 | UMAD1       |
| ENSGALG000000009433 | 12972,3   | 0,528259009 | 0,1367266 | 3,8636145 | 0,0001117 | 0,0008235 | BAG3        |
| ENSGALG000000011350 | 565,5219  | 0,52709173  | 0,1912783 | 2,7556272 | 0,005858  | 0,0228071 | NEGR1       |
| ENSGALG000000015372 | 6118,1225 | 0,526646329 | 0,1098598 | 4,7938042 | 1,64E-06  | 2,03E-05  | ATP5I       |
| ENSGALG000000024346 | 1302,1617 | 0,525612903 | 0,1486838 | 3,5351054 | 0,0004076 | 0,0025272 | FAM46B      |
| ENSGALG000000013839 | 706,87354 | 0,524875259 | 0,1772725 | 2,9608384 | 0,003068  | 0,0134226 |             |
| ENSGALG000000015306 | 3107,5418 | 0,524586766 | 0,1467809 | 3,5739432 | 0,0003516 | 0,0022279 | OSTM1       |
| ENSGALG000000026545 | 5534,2449 | 0,524540794 | 0,126285  | 4,1536273 | 3,27E-05  | 0,000286  |             |
| ENSGALG000000002777 | 12410,374 | 0,524514209 | 0,1049816 | 4,996249  | 5,85E-07  | 7,98E-06  | ACAA2       |
| ENSGALG000000015326 | 10708,875 | 0,524363909 | 0,1179079 | 4,4472344 | 8,70E-06  | 9,12E-05  | CLTA        |
| ENSGALG000000014846 | 1408,263  | 0,524315684 | 0,1475731 | 3,5529214 | 0,000381  | 0,0023794 | OXCT1       |
| ENSGALG000000011945 | 1101,0533 | 0,524157211 | 0,1675307 | 3,1287225 | 0,0017557 | 0,0084616 | SCRN2       |
| ENSGALG000000011349 | 1290,6252 | 0,523508946 | 0,2028294 | 2,5810314 | 0,0098506 | 0,0347594 | MNR2        |
| ENSGALG000000006901 | 2767,4012 | 0,523326668 | 0,1242839 | 4,2107361 | 2,55E-05  | 0,0002309 | AATK        |
| ENSGALG000000026113 | 4499,0711 | 0,523056553 | 0,1465805 | 3,5683905 | 0,0003592 | 0,0022661 | CARHSP1     |
| ENSGALG000000000433 | 145504,42 | 0,523011809 | 0,1027427 | 5,0905032 | 3,57E-07  | 5,11E-06  | TUBA4A      |
| ENSGALG000000016886 | 6214,4284 | 0,522545779 | 0,1102341 | 4,7403267 | 2,13E-06  | 2,56E-05  | FARP1       |
| ENSGALG000000014321 | 925,70397 | 0,522295082 | 0,1727289 | 3,0237853 | 0,0024963 | 0,0113033 | SMIM14      |
| ENSGALG000000008367 | 12605,915 | 0,522250337 | 0,1198719 | 4,3567381 | 1,32E-05  | 0,0001314 | MDK         |
| ENSGALG000000023812 | 573,55559 | 0,520869219 | 0,1910734 | 2,7260163 | 0,0064104 | 0,024599  | CCNI2       |
| ENSGALG000000008911 | 1167,8871 | 0,520705327 | 0,1637362 | 3,1801469 | 0,001472  | 0,0073224 | RNF208      |
| ENSGALG000000023338 | 5372,4298 | 0,520605081 | 0,1279451 | 4,0689734 | 4,72E-05  | 0,0003908 | CBX2        |
| ENSGALG000000016266 | 844,50002 | 0,519693116 | 0,1718383 | 3,0243148 | 0,002492  | 0,0112906 | PRRG1       |
| ENSGALG000000027069 | 549,10808 | 0,519660528 | 0,2040614 | 2,5465893 | 0,0108781 | 0,037619  | TSC22D3     |
| ENSGALG000000001944 | 1567,5072 | 0,519218499 | 0,1502243 | 3,4562878 | 0,0005477 | 0,0032349 | TBC1D2      |
| ENSGALG000000000059 | 125389,82 | 0,519152064 | 0,1205209 | 4,307569  | 1,65E-05  | 0,0001587 | TUBB3       |
| ENSGALG000000004775 | 978,22061 | 0,519049003 | 0,1721556 | 3,0149984 | 0,0025698 | 0,0115624 | COLGALT2    |
| ENSGALG000000005346 | 2351,8167 | 0,518505546 | 0,1295966 | 4,0009207 | 6,31E-05  | 0,0005021 | PPIC        |
| ENSGALG000000026560 | 1526,6551 | 0,518030334 | 0,1900719 | 2,7254446 | 0,0064215 | 0,0246347 | PRDM8       |
| ENSGALG000000028033 | 2016,6076 | 0,517359519 | 0,1337773 | 3,8673194 | 0,00011   | 0,0008129 | PURA        |
| ENSGALG000000026891 | 1109,4806 | 0,516642503 | 0,1835376 | 2,814914  | 0,004879  | 0,0196824 | NINJ1       |
| ENSGALG000000013024 | 1376,2985 | 0,516485359 | 0,1557483 | 3,3161536 | 0,0009127 | 0,0049604 | IL17RA      |
| ENSGALG000000028567 | 2485,7677 | 0,515072598 | 0,1278731 | 4,027999  | 5,63E-05  | 0,0004562 | MYL9        |
| ENSGALG000000001998 | 1765,5757 | 0,514536405 | 0,138305  | 3,7203024 | 0,000199  | 0,0013569 | R3HDM4      |
| ENSGALG000000027073 | 784,17281 | 0,514122556 | 0,1915064 | 2,684623  | 0,0072612 | 0,0272551 | AAMDC       |
| ENSGALG000000012089 | 5360,5907 | 0,513995299 | 0,1209653 | 4,2491144 | 2,15E-05  | 0,0001992 | C14orf37    |
| ENSGALG000000013708 | 5397,0941 | 0,513478256 | 0,1315099 | 3,9044846 | 9,44E-05  | 0,0007134 | CYB5A       |
| ENSGALG000000029159 | 2974,1732 | 0,51305649  | 0,129165  | 3,9721007 | 7,12E-05  | 0,00056   | APBB1       |
| ENSGALG000000005901 | 2799,2351 | 0,510684045 | 0,1324352 | 3,8561047 | 0,0001152 | 0,0008451 | PCMTD2      |
| ENSGALG000000023786 | 1008,229  | 0,510469642 | 0,1622026 | 3,1471121 | 0,0016489 | 0,008038  | PLEKHH3     |
| ENSGALG000000017053 | 1433,2665 | 0,50974214  | 0,1465107 | 3,4792149 | 0,0005029 | 0,0030135 | SPG20       |
| ENSGALG000000004741 | 5108,3909 | 0,509578858 | 0,1446763 | 3,5221998 | 0,000428  | 0,0026378 | EPHB2       |
| ENSGALG000000012644 | 1843,5171 | 0,509005651 | 0,1372404 | 3,7088609 | 0,0002082 | 0,0014145 | FOXD3_CHICK |

|                    |           |             |           |           |           |           |          |
|--------------------|-----------|-------------|-----------|-----------|-----------|-----------|----------|
| ENSGALG00000012697 | 713,61608 | 0,508988728 | 0,1895408 | 2,6853778 | 0,0072448 | 0,0272029 | SLC41A2  |
| ENSGALG00000016014 | 587,48188 | 0,508625141 | 0,2007004 | 2,534251  | 0,0112688 | 0,0386655 | RCAN1    |
| ENSGALG00000029036 | 2011,0671 | 0,506773529 | 0,1625524 | 3,1176018 | 0,0018233 | 0,0087194 | ZNF687   |
| ENSGALG00000016708 | 1004,6127 | 0,506256389 | 0,1774268 | 2,8533257 | 0,0043264 | 0,0177744 | ENPP4    |
| ENSGALG00000011324 | 77589,574 | 0,50624037  | 0,1039388 | 4,8705612 | 1,11E-06  | 1,44E-05  | TUBA4B   |
| ENSGALG00000015597 | 932,24281 | 0,505967585 | 0,1755067 | 2,8828969 | 0,0039404 | 0,0164962 | CPZ      |
| ENSGALG00000005757 | 2287,1727 | 0,505955901 | 0,148039  | 3,4177214 | 0,0006315 | 0,0036399 | IRF8     |
| ENSGALG00000011942 | 693,1373  | 0,505923034 | 0,1765129 | 2,8662097 | 0,0041542 | 0,0172007 |          |
| ENSGALG00000003175 | 433,6143  | 0,505815122 | 0,2067003 | 2,4470941 | 0,0144013 | 0,0467957 | STKLD1   |
| ENSGALG00000012670 | 2710,2763 | 0,505329169 | 0,1395627 | 3,6208026 | 0,0002937 | 0,0019059 | NRSN1    |
| ENSGALG00000028145 | 4237,9607 | 0,505320547 | 0,1554994 | 3,2496615 | 0,0011554 | 0,0060245 |          |
| ENSGALG00000027891 | 10377,445 | 0,504324315 | 0,1084665 | 4,649585  | 3,33E-06  | 3,83E-05  | NREP     |
| ENSGALG00000024295 | 3217,4381 | 0,504249612 | 0,1324209 | 3,8079298 | 0,0001401 | 0,0010058 |          |
| ENSGALG00000008631 | 3955,1009 | 0,503418102 | 0,1318317 | 3,8186431 | 0,0001342 | 0,0009682 | TYRO3    |
| ENSGALG00000015026 | 714,61563 | 0,503288049 | 0,182056  | 2,7644677 | 0,0057016 | 0,0223002 | TRAF3IP2 |
| ENSGALG00000005811 | 1644,0505 | 0,503226947 | 0,1577089 | 3,1908596 | 0,0014185 | 0,0071292 | COL7A1   |
| ENSGALG00000006802 | 2159,6578 | 0,502556738 | 0,1878266 | 2,6756417 | 0,0074586 | 0,0278522 | LAMB2    |
| ENSGALG00000025977 | 2572,6109 | 0,502103804 | 0,1296104 | 3,8739483 | 0,0001071 | 0,0007966 | GADD45A  |
| ENSGALG00000023554 | 790,06032 | 0,500814372 | 0,1776938 | 2,8184128 | 0,0048262 | 0,0194807 | PIGW     |
| ENSGALG00000024398 | 21096,229 | 0,500531072 | 0,1162284 | 4,3064435 | 1,66E-05  | 0,0001594 | RPS28    |
| ENSGALG00000004851 | 3943,1572 | 0,500191453 | 0,1444617 | 3,4624504 | 0,0005353 | 0,0031741 | MED9     |
| ENSGALG00000008341 | 3732,2674 | 0,499807137 | 0,1274369 | 3,9219961 | 8,78E-05  | 0,0006725 | FURIN    |
| ENSGALG00000012487 | 1459,0736 | 0,499098415 | 0,1787383 | 2,7923417 | 0,0052328 | 0,0208196 | MPST     |
| ENSGALG00000011326 | 2703,9221 | 0,4983963   | 0,1426307 | 3,4943128 | 0,0004753 | 0,0028759 | STK16    |
| ENSGALG00000000842 | 2625,6895 | 0,49824929  | 0,1497155 | 3,3279751 | 0,0008748 | 0,0047852 | NDUFA2   |
| ENSGALG00000011181 | 876,58708 | 0,497942212 | 0,1756687 | 2,834553  | 0,004589  | 0,0186403 | FKBP14   |
| ENSGALG00000018819 | 651,0396  | 0,497763645 | 0,1880595 | 2,6468407 | 0,0081248 | 0,0297602 | TBCEL    |
| ENSGALG00000007370 | 4047,939  | 0,4969378   | 0,1207586 | 4,115134  | 3,87E-05  | 0,0003312 | CLP1     |
| ENSGALG00000012947 | 2224,1495 | 0,495800698 | 0,1377049 | 3,6004578 | 0,0003177 | 0,0020391 | CAPRIN2  |
| ENSGALG00000013067 | 8815,6345 | 0,494753671 | 0,1163549 | 4,2521102 | 2,12E-05  | 0,0001972 | AKR1B1   |
| ENSGALG00000007441 | 1294,7426 | 0,494713822 | 0,1878271 | 2,633879  | 0,0084416 | 0,030714  | MAP6     |
| ENSGALG00000000527 | 6471,7809 | 0,494652161 | 0,1195904 | 4,1362185 | 3,53E-05  | 0,0003062 | SH3BGRL3 |
| ENSGALG00000012540 | 1788,9218 | 0,494557337 | 0,1380803 | 3,5816639 | 0,0003414 | 0,0021731 | RBFOX2   |
| ENSGALG00000011778 | 2592,1932 | 0,494085012 | 0,1468186 | 3,3652744 | 0,0007647 | 0,0042862 | ITGB5    |
| ENSGALG00000009090 | 635,87673 | 0,493735019 | 0,1952486 | 2,5287506 | 0,0114469 | 0,0390797 | UAP1L1   |
| ENSGALG00000001242 | 570,55086 | 0,493511493 | 0,1867093 | 2,6432083 | 0,0082124 | 0,030041  |          |
| ENSGALG00000027824 | 1654,6946 | 0,493225579 | 0,1467768 | 3,360379  | 0,0007784 | 0,0043539 | MRPL55   |
| ENSGALG00000005897 | 4766,7142 | 0,493064333 | 0,1262096 | 3,9067089 | 9,36E-05  | 0,0007093 | HMCES    |
| ENSGALG00000012816 | 2261,4061 | 0,492973169 | 0,1565978 | 3,1480205 | 0,0016438 | 0,0080223 | SLC22A23 |
| ENSGALG00000005071 | 6694,0161 | 0,492854493 | 0,1137172 | 4,3340352 | 1,46E-05  | 0,000144  | MPP1     |
| ENSGALG00000000336 | 3779,8129 | 0,492268059 | 0,1394428 | 3,5302496 | 0,0004152 | 0,0025705 | PPP1R12B |
| ENSGALG00000004351 | 891,83433 | 0,49204731  | 0,1689419 | 2,9125234 | 0,0035852 | 0,0152683 |          |
| ENSGALG00000004902 | 4281,0079 | 0,491426093 | 0,1175409 | 4,1808935 | 2,90E-05  | 0,0002581 | TOM1L2   |
| ENSGALG00000026195 | 759,73378 | 0,491395512 | 0,1717565 | 2,8610013 | 0,0042231 | 0,017455  | GALT     |
| ENSGALG00000011894 | 1400,2218 | 0,491394089 | 0,1454582 | 3,3782503 | 0,0007295 | 0,0041177 | CYP2D6   |
| ENSGALG00000017076 | 6428,3314 | 0,490620681 | 0,1467776 | 3,3426126 | 0,0008299 | 0,0045704 | B3GLCT   |
| ENSGALG00000008409 | 5336,4487 | 0,490103959 | 0,1431132 | 3,4245884 | 0,0006157 | 0,0035734 | GSTO1    |
| ENSGALG00000005751 | 599,07782 | 0,487576383 | 0,1863158 | 2,6169354 | 0,0088723 | 0,0319489 | RAB26    |
| ENSGALG00000005299 | 758,00774 | 0,487367317 | 0,1823876 | 2,6721512 | 0,0075367 | 0,028082  | ANXA7    |
| ENSGALG00000010230 | 677,39962 | 0,486896744 | 0,1774474 | 2,7438932 | 0,0060715 | 0,0234907 | TESK2    |
| ENSGALG00000011531 | 2214,443  | 0,486736013 | 0,1514726 | 3,2133593 | 0,0013119 | 0,0066923 | APAF1    |
| ENSGALG00000006915 | 1392,1391 | 0,485309324 | 0,1555538 | 3,1198817 | 0,0018092 | 0,0086661 | BAIAP2   |
| ENSGALG00000011798 | 1079,8245 | 0,484782273 | 0,1756184 | 2,7604306 | 0,0057725 | 0,0225205 | HEBP1    |
| ENSGALG00000017419 | 644,62948 | 0,484006649 | 0,1950269 | 2,4817427 | 0,0130742 | 0,0434688 | HPS1     |
| ENSGALG00000000947 | 2256,1097 | 0,482847185 | 0,1494215 | 3,2314447 | 0,0012317 | 0,0063519 | FKBP5    |
| ENSGALG00000027173 | 1663,1472 | 0,482690141 | 0,1744895 | 2,7662985 | 0,0056697 | 0,0222137 | TMEM159  |
| ENSGALG00000008604 | 829,00435 | 0,482676253 | 0,1667486 | 2,8946345 | 0,003796  | 0,0160157 | TMEM255A |
| ENSGALG00000014581 | 2314,88   | 0,482286067 | 0,1382204 | 3,4892527 | 0,0004844 | 0,0029219 | MEF2BNB  |
| ENSGALG00000011738 | 6621,7844 | 0,482221251 | 0,1182329 | 4,0785695 | 4,53E-05  | 0,0003771 | ARHGDIB  |
| ENSGALG00000027688 | 6057,2057 | 0,481915396 | 0,1181641 | 4,0783585 | 4,54E-05  | 0,0003772 | NDUFB4   |
| ENSGALG00000004476 | 498,99618 | 0,48187718  | 0,1958501 | 2,4604391 | 0,0138767 | 0,045449  | SEMA3G   |
| ENSGALG00000000625 | 1809,062  | 0,481753107 | 0,1576512 | 3,0558166 | 0,0022445 | 0,0103589 | MAPT     |

|                     |           |             |           |           |           |           |            |
|---------------------|-----------|-------------|-----------|-----------|-----------|-----------|------------|
| ENSGALG00000015774  | 1090,9886 | 0,481727224 | 0,159212  | 3,0256962 | 0,0024806 | 0,0112579 | CYYR1      |
| ENSGALG00000001763  | 1095,0503 | 0,481398992 | 0,1634996 | 2,9443437 | 0,0032364 | 0,0140062 | CZH18ORF25 |
| ENSGALG000000005713 | 4508,0892 | 0,480930735 | 0,1143118 | 4,2071834 | 2,59E-05  | 0,0002339 | NCKIPSD    |
| ENSGALG000000022838 | 522,00396 | 0,480740174 | 0,1959359 | 2,4535587 | 0,014145  | 0,0461834 | GAREM2     |
| ENSGALG000000003405 | 5095,9892 | 0,480657067 | 0,1124415 | 4,2747319 | 1,91E-05  | 0,0001804 | BSDC1      |
| ENSGALG000000002033 | 6624,4207 | 0,480537464 | 0,1111006 | 4,3252479 | 1,52E-05  | 0,0001482 | NDUFB6     |
| ENSGALG000000001531 | 815,50813 | 0,480440457 | 0,1690567 | 2,8418887 | 0,0044847 | 0,0182867 | FN3K       |
| ENSGALG000000029135 | 7403,5283 | 0,479980361 | 0,1296505 | 3,7021087 | 0,0002138 | 0,0014476 | YEATS4     |
| ENSGALG000000011436 | 3916,7711 | 0,477975314 | 0,1192676 | 4,0075871 | 6,13E-05  | 0,0004904 | TMBIM1     |
| ENSGALG000000003466 | 4818,2759 | 0,477695903 | 0,1342072 | 3,5593901 | 0,0003717 | 0,0023355 | AKR1B1L    |
| ENSGALG000000007661 | 1313,7584 | 0,477627101 | 0,1756565 | 2,7190975 | 0,006546  | 0,0250419 | MYCBPAP    |
| ENSGALG000000029123 | 831,21662 | 0,477624117 | 0,1743995 | 2,7386782 | 0,0061687 | 0,0238124 | RBFOX3     |
| ENSGALG000000001606 | 1726,3623 | 0,477443775 | 0,1469062 | 3,2499912 | 0,0011541 | 0,0060203 | INPP5B     |
| ENSGALG000000000785 | 1523,6714 | 0,476932316 | 0,1468983 | 3,2466828 | 0,0011676 | 0,0060741 | HYAL1      |
| ENSGALG000000028573 | 1369,3549 | 0,476874115 | 0,1566656 | 3,0438978 | 0,0023353 | 0,0107165 | SAYSD1     |
| ENSGALG000000014765 | 2914,6817 | 0,476665637 | 0,1245755 | 3,8263205 | 0,0001301 | 0,0009415 | TRIM23     |
| ENSGALG000000016994 | 1571,3108 | 0,474313428 | 0,1588828 | 2,9853031 | 0,002833  | 0,012572  | NUDT15     |
| ENSGALG000000000943 | 4846,5059 | 0,473716041 | 0,112782  | 4,2002794 | 2,67E-05  | 0,0002402 | WDTC1      |
| ENSGALG000000006588 | 1949,8657 | 0,473632802 | 0,1386756 | 3,4154005 | 0,0006369 | 0,0036653 | LRRC75B    |
| ENSGALG000000012704 | 1775,4396 | 0,473322212 | 0,1740897 | 2,7188406 | 0,0065511 | 0,0250543 | MYLIP      |
| ENSGALG000000002615 | 1139,5869 | 0,472751564 | 0,1639644 | 2,883258  | 0,0039358 | 0,0164831 | DEF6       |
| ENSGALG000000023157 | 3625,8738 | 0,472554642 | 0,1422354 | 3,3223424 | 0,0008927 | 0,0048731 | REEP5      |
| ENSGALG000000001849 | 1893,9454 | 0,47187756  | 0,1796068 | 2,6272817 | 0,008607  | 0,0311909 | BSN        |
| ENSGALG000000006702 | 2572,8058 | 0,471728545 | 0,1314835 | 3,5877394 | 0,0003336 | 0,0021305 | MFGE8      |
| ENSGALG000000003359 | 6429,5457 | 0,469661247 | 0,1200374 | 3,9126251 | 9,13E-05  | 0,0006948 | RAB5C      |
| ENSGALG000000027377 | 1588,8633 | 0,469161575 | 0,1429069 | 3,2829883 | 0,0010271 | 0,0054584 | NKAIN3     |
| ENSGALG000000013511 | 6097,6262 | 0,469095656 | 0,1205264 | 3,892056  | 9,94E-05  | 0,000746  | ANKRA2     |
| ENSGALG000000014963 | 978,12348 | 0,468684934 | 0,1590044 | 2,9476227 | 0,0032023 | 0,0138939 | DSE        |
| ENSGALG000000016988 | 780,62352 | 0,468570179 | 0,173966  | 2,6934591 | 0,0070715 | 0,026633  | KIAA0226L  |
| ENSGALG000000003348 | 1706,407  | 0,468370054 | 0,138122  | 3,3909876 | 0,0006964 | 0,0039639 | HIGD2A     |
| ENSGALG000000027993 | 718,86063 | 0,467989481 | 0,184762  | 2,5329319 | 0,0113113 | 0,0387543 | MXD3       |
| ENSGALG000000028342 | 3684,9232 | 0,4672884   | 0,1405267 | 3,3252632 | 0,0008834 | 0,0048262 | CHAC1      |
| ENSGALG000000004581 | 7502,7339 | 0,466855623 | 0,1169353 | 3,9924255 | 6,54E-05  | 0,0005177 | NDST1      |
| ENSGALG000000013795 | 1427,0027 | 0,466841888 | 0,1691704 | 2,759595  | 0,0057873 | 0,0225577 | HIVEP2     |
| ENSGALG000000007238 | 3294,4647 | 0,466556765 | 0,1396865 | 3,3400276 | 0,0008377 | 0,0046082 | PCSK6      |
| ENSGALG000000001556 | 1997,4095 | 0,466292104 | 0,1362595 | 3,4220882 | 0,0006214 | 0,0035957 | ROMO1      |
| ENSGALG000000006942 | 9942,2696 | 0,465540173 | 0,155783  | 2,988388  | 0,0028045 | 0,0124702 | PIK3IP1    |
| ENSGALG000000009655 | 1343,4112 | 0,465196113 | 0,1463089 | 3,1795467 | 0,0014751 | 0,0073322 | AADAT      |
| ENSGALG000000005074 | 969,33864 | 0,464823262 | 0,1663096 | 2,7949274 | 0,0051911 | 0,020684  | FAM102A    |
| ENSGALG000000002485 | 4126,4279 | 0,464623616 | 0,1275886 | 3,6415767 | 0,000271  | 0,0017746 | PHKG1      |
| ENSGALG000000011474 | 2398,5188 | 0,463345487 | 0,1386209 | 3,3425371 | 0,0008302 | 0,0045704 | OSBPL10    |
| ENSGALG000000013698 | 1914,3877 | 0,462883571 | 0,1399784 | 3,3068211 | 0,0009436 | 0,0051001 | EFHD2      |
| ENSGALG000000007582 | 9089,3986 | 0,462276159 | 0,111854  | 4,1328546 | 3,58E-05  | 0,0003098 | DPYSL3     |
| ENSGALG000000003976 | 1632,2576 | 0,461042882 | 0,1442377 | 3,1964111 | 0,0013915 | 0,0070167 | BCORL1     |
| ENSGALG000000024391 | 9415,8207 | 0,460947942 | 0,1147209 | 4,0179932 | 5,87E-05  | 0,0004723 | CACTIN     |
| ENSGALG000000027418 | 872,62308 | 0,460841146 | 0,1699387 | 2,7118078 | 0,0066917 | 0,0255122 | HINT2      |
| ENSGALG000000003406 | 1016,1622 | 0,460645128 | 0,185859  | 2,4784659 | 0,0131949 | 0,0437898 | RXRG       |
| ENSGALG000000014818 | 715,41879 | 0,460609845 | 0,1805705 | 2,5508589 | 0,0107458 | 0,0372559 | TRIM45     |
| ENSGALG000000024034 | 3571,4505 | 0,460548751 | 0,1231211 | 3,740617  | 0,0001836 | 0,0012713 | PI4KB      |
| ENSGALG000000014226 | 4001,8851 | 0,460133597 | 0,1394922 | 3,2986321 | 0,0009716 | 0,0052095 | KIAA0930   |
| ENSGALG000000022980 | 7902,7397 | 0,459059074 | 0,1123607 | 4,0855838 | 4,40E-05  | 0,0003668 | CDKN1B     |
| ENSGALG000000001728 | 1860,8126 | 0,458348865 | 0,1498189 | 3,0593533 | 0,0022182 | 0,0102792 | NACC2      |
| ENSGALG000000014324 | 2616,4144 | 0,458208088 | 0,1484479 | 3,0866594 | 0,0020242 | 0,0095394 | SLC2A3     |
| ENSGALG000000026871 | 2483,7701 | 0,457953468 | 0,1821233 | 2,5145249 | 0,0119193 | 0,0403885 | SC5D       |
| ENSGALG000000015972 | 3109,9302 | 0,45786464  | 0,1525893 | 3,0006332 | 0,0026942 | 0,0120504 | IFNGR2     |
| ENSGALG000000001881 | 2571,7226 | 0,456046301 | 0,1474962 | 3,0919195 | 0,0019887 | 0,0093882 | DNLZ       |
| ENSGALG000000001779 | 903,85433 | 0,455324974 | 0,1721096 | 2,6455517 | 0,0081558 | 0,0298497 | KIAA0895L  |
| ENSGALG000000000921 | 4858,4012 | 0,454646053 | 0,1160077 | 3,9191038 | 8,89E-05  | 0,0006791 | SLC9A1     |
| ENSGALG000000004537 | 5387,8208 | 0,454616982 | 0,1154772 | 3,9368562 | 8,26E-05  | 0,0006354 | EFNB1      |
| ENSGALG000000016870 | 5615,9964 | 0,454001604 | 0,1190199 | 3,8145028 | 0,0001365 | 0,000984  | TMTC4      |
| ENSGALG000000011655 | 1599,7524 | 0,452530841 | 0,1507993 | 3,0008809 | 0,002692  | 0,0120445 | IQCB1      |
| ENSGALG000000011592 | 753,887   | 0,452054353 | 0,1756234 | 2,5739982 | 0,0100531 | 0,0353038 | MRAS       |

|                    |           |             |           |           |           |           |               |
|--------------------|-----------|-------------|-----------|-----------|-----------|-----------|---------------|
| ENSGALG00000027963 | 10511,195 | 0,451771641 | 0,1053151 | 4,2897137 | 1,79E-05  | 0,0001697 | COX7C         |
| ENSGALG00000012110 | 938,42508 | 0,451377511 | 0,1665857 | 2,7095817 | 0,0067368 | 0,0256277 | KIAA0895      |
| ENSGALG00000009054 | 1742,5243 | 0,451368563 | 0,1444522 | 3,1246911 | 0,0017799 | 0,008551  | TMEM141       |
| ENSGALG00000017351 | 2392,614  | 0,45115395  | 0,1297902 | 3,4760237 | 0,0005089 | 0,0030416 | STIM1         |
| ENSGALG00000007286 | 2211,1348 | 0,450759437 | 0,1433837 | 3,1437292 | 0,0016681 | 0,0081111 | SIRT7         |
| ENSGALG00000004623 | 967,41624 | 0,450139696 | 0,1793951 | 2,5092091 | 0,0121002 | 0,0408428 | AGTRAP        |
| ENSGALG00000001376 | 9938,3188 | 0,45012042  | 0,1054385 | 4,2690347 | 1,96E-05  | 0,0001846 | ARID3B        |
| ENSGALG00000017126 | 2105,4507 | 0,449836372 | 0,1445661 | 3,111632  | 0,0018606 | 0,0088634 | ZDHHC20       |
| ENSGALG00000004353 | 9460,5472 | 0,448918917 | 0,1126661 | 3,9845069 | 6,76E-05  | 0,0005331 | TBCA          |
| ENSGALG00000015780 | 22777,794 | 0,447991765 | 0,1105939 | 4,0507816 | 5,10E-05  | 0,0004182 | PNRC1         |
| ENSGALG00000026200 | 2407,7782 | 0,447943252 | 0,1654706 | 2,7070867 | 0,0067877 | 0,0257707 | FAM134B       |
| ENSGALG00000012218 | 3810,3697 | 0,44776649  | 0,1283039 | 3,4898898 | 0,0004832 | 0,0029175 | CBY1          |
| ENSGALG00000008274 | 1660,0276 | 0,446767639 | 0,1420336 | 3,1455061 | 0,001658  | 0,0080707 | CRBN          |
| ENSGALG00000005608 | 3810,2468 | 0,44662731  | 0,1300871 | 3,4332951 | 0,0005963 | 0,0034739 | SLC9A3R2      |
| ENSGALG00000007296 | 1317,9251 | 0,446130433 | 0,1486148 | 3,0019248 | 0,0026828 | 0,0120073 | MAFG          |
| ENSGALG00000016545 | 1336,374  | 0,445723593 | 0,1531647 | 2,910094  | 0,0036132 | 0,0153682 | REPS2         |
| ENSGALG00000017329 | 3706,9673 | 0,44555284  | 0,1363133 | 3,2685934 | 0,0010808 | 0,0057037 | FCHSD2        |
| ENSGALG00000016210 | 979,19029 | 0,445450514 | 0,1608438 | 2,7694608 | 0,0056149 | 0,0220587 | ST3GAL1       |
| ENSGALG00000015987 | 4807,1926 | 0,445391941 | 0,1245569 | 3,5758102 | 0,0003491 | 0,0022157 | TP53INP1      |
| ENSGALG00000008681 | 1024,5364 | 0,444903231 | 0,167862  | 2,65041   | 0,0080394 | 0,029535  | NSMF          |
| ENSGALG00000000067 | 2534,6314 | 0,444870546 | 0,1286038 | 3,4592336 | 0,0005417 | 0,0032081 | SPR           |
| ENSGALG00000011921 | 3797,7786 | 0,444716768 | 0,1414811 | 3,1432948 | 0,0016706 | 0,0081203 | DHRS7         |
| ENSGALG00000000233 | 2504,2434 | 0,444272958 | 0,1492937 | 2,9758312 | 0,002922  | 0,0128913 | SP2           |
| ENSGALG00000015344 | 1754,4897 | 0,442789405 | 0,1532928 | 2,88852   | 0,0038706 | 0,0162799 | NXPE3         |
| ENSGALG00000027337 | 6395,1608 | 0,441351335 | 0,1148234 | 3,8437395 | 0,0001212 | 0,0008818 | CLDND1        |
| ENSGALG00000004907 | 2377,2693 | 0,441232207 | 0,1337197 | 3,2996803 | 0,000968  | 0,0051966 | KCTD15        |
| ENSGALG00000002626 | 1744,7946 | 0,440405851 | 0,1788023 | 2,4630889 | 0,0137746 | 0,0451855 | RXRA          |
| ENSGALG00000017096 | 2040,4546 | 0,440278375 | 0,1337931 | 3,29074   | 0,0009992 | 0,0053268 | LNX2          |
| ENSGALG00000012043 | 13548,036 | 0,439717314 | 0,1042663 | 4,2172536 | 2,47E-05  | 0,0002255 | PDCD6IP       |
| ENSGALG00000012265 | 3656,8809 | 0,439419657 | 0,1289098 | 3,4087374 | 0,0006526 | 0,0037398 | MICALL1       |
| ENSGALG00000015988 | 2456,5859 | 0,439214581 | 0,1576704 | 2,785651  | 0,005342  | 0,0211799 | PLEKHF2       |
| ENSGALG00000002986 | 2686,672  | 0,439006087 | 0,125125  | 3,5085396 | 0,0004506 | 0,0027448 | WNK4          |
| ENSGALG00000010811 | 7190,0128 | 0,438424216 | 0,1472899 | 2,9766068 | 0,0029146 | 0,0128629 | LGMN          |
| ENSGALG00000005820 | 8527,7428 | 0,438136271 | 0,1128485 | 3,8825187 | 0,0001034 | 0,0007734 | RNF130        |
| ENSGALG00000012913 | 1327,8126 | 0,437865562 | 0,1766936 | 2,478107  | 0,0132082 | 0,043818  | PKP2          |
| ENSGALG00000006204 | 1464,0386 | 0,437842966 | 0,1451037 | 3,0174484 | 0,0025491 | 0,0114911 | CHST13        |
| ENSGALG00000012136 | 1595,9568 | 0,437388472 | 0,1538246 | 2,8434236 | 0,0044632 | 0,0182316 | MPPED2        |
| ENSGALG00000026116 | 1987,2825 | 0,437155594 | 0,135619  | 3,2234086 | 0,0012667 | 0,006496  | MAPRE3        |
| ENSGALG00000013091 | 2461,6299 | 0,436802578 | 0,1334788 | 3,272449  | 0,0010662 | 0,0056418 | EPS8          |
| ENSGALG00000008444 | 16562,743 | 0,436671101 | 0,1126641 | 3,8758677 | 0,0001062 | 0,0007926 | TUBAL3        |
| ENSGALG00000012821 | 60743,332 | 0,436526282 | 0,1102259 | 3,9602861 | 7,49E-05  | 0,0005824 | TUBB2B        |
| ENSGALG00000016322 | 1469,7377 | 0,435481617 | 0,165226  | 2,6356732 | 0,0083971 | 0,030593  |               |
| ENSGALG00000006399 | 2888,1679 | 0,435019992 | 0,1286562 | 3,38126   | 0,0007215 | 0,0040828 | MESDC1        |
| ENSGALG00000001289 | 1028,449  | 0,434897808 | 0,1641592 | 2,6492441 | 0,0080672 | 0,0296038 | SHC2          |
| ENSGALG00000010134 | 2529,1958 | 0,434710794 | 0,126122  | 3,4467496 | 0,0005674 | 0,003334  | ZFAND3        |
| ENSGALG00000000270 | 895,80796 | 0,434589704 | 0,1737942 | 2,500599  | 0,0123983 | 0,0416902 | THRA          |
| ENSGALG00000016059 | 2071,2967 | 0,434358409 | 0,1376843 | 3,1547427 | 0,0016064 | 0,0078758 | ETS2          |
| ENSGALG00000000049 | 1247,3305 | 0,433824072 | 0,1496385 | 2,8991468 | 0,0037418 | 0,015841  | CSDC2         |
| ENSGALG00000006655 | 1295,5112 | 0,433042079 | 0,15427   | 2,8070402 | 0,0049999 | 0,0200672 | MAP3K13       |
| ENSGALG00000021365 | 7390,78   | 0,432965219 | 0,1172033 | 3,6941392 | 0,0002206 | 0,0014864 | DCTN3         |
| ENSGALG00000003447 | 2587,3652 | 0,432921053 | 0,1381602 | 3,1334707 | 0,0017275 | 0,0083553 | FRS3          |
| ENSGALG00000015607 | 3625,3575 | 0,432451982 | 0,1684544 | 2,5671749 | 0,0102531 | 0,035895  | NCOA2         |
| ENSGALG00000004725 | 7054,5494 | 0,431307897 | 0,129893  | 3,3204852 | 0,0008986 | 0,0048938 | RP11-162P23.2 |
| ENSGALG00000014410 | 1635,3072 | 0,430076039 | 0,1754863 | 2,450767  | 0,0142552 | 0,0464477 | CSTB          |
| ENSGALG00000029157 | 4821,9983 | 0,430051945 | 0,1512627 | 2,8430801 | 0,004468  | 0,0182458 | MBNL3         |
| ENSGALG00000000551 | 4770,6021 | 0,428841133 | 0,1175738 | 3,6474204 | 0,0002649 | 0,0017414 | C6orf89       |
| ENSGALG00000014804 | 1784,8867 | 0,427778224 | 0,1683627 | 2,5408135 | 0,0110595 | 0,0381106 | THBS4         |
| ENSGALG00000005295 | 1837,9552 | 0,4276113   | 0,1611793 | 2,653017  | 0,0079776 | 0,029382  | BCAS3         |
| ENSGALG00000023612 | 4284,8687 | 0,427551312 | 0,1222371 | 3,4977227 | 0,0004692 | 0,0028433 | LZTS2         |
| ENSGALG00000010838 | 5580,7171 | 0,427079258 | 0,1310404 | 3,2591413 | 0,0011175 | 0,0058586 | ERO1LB        |
| ENSGALG00000016605 | 1894,8074 | 0,426964808 | 0,1498455 | 2,8493661 | 0,0043806 | 0,0179484 | EFR3B         |
| ENSGALG00000007630 | 1371,8459 | 0,426278895 | 0,1475832 | 2,8883966 | 0,0038721 | 0,0162813 | CDIP1         |

|                    |           |             |           |           |           |           |            |
|--------------------|-----------|-------------|-----------|-----------|-----------|-----------|------------|
| ENSGALG00000026022 | 1208,8026 | 0,425857109 | 0,1749797 | 2,4337512 | 0,0149433 | 0,0482458 | CREG2      |
| ENSGALG00000027822 | 849,07694 | 0,425453865 | 0,1646142 | 2,5845511 | 0,0097506 | 0,0344727 |            |
| ENSGALG00000015304 | 5360,7582 | 0,425237788 | 0,1168587 | 3,6389042 | 0,0002738 | 0,0017905 | SNX3       |
| ENSGALG00000020528 | 5739,52   | 0,424819785 | 0,1109172 | 3,8300637 | 0,0001281 | 0,0009293 | INIP       |
| ENSGALG00000014569 | 787,05235 | 0,42466715  | 0,1733979 | 2,4490901 | 0,0143218 | 0,0466262 | PNPLA2     |
| ENSGALG00000015603 | 3809,7497 | 0,424497436 | 0,1338532 | 3,171366  | 0,0015172 | 0,0075035 | ZCCHC9     |
| ENSGALG00000021688 | 803,0907  | 0,424387775 | 0,170819  | 2,4844292 | 0,0129759 | 0,0431738 | CD320      |
| ENSGALG00000001975 | 1467,2899 | 0,42427092  | 0,1628237 | 2,6057072 | 0,0091685 | 0,0327635 | TMEM120A   |
| ENSGALG00000026692 | 7703,2554 | 0,424103985 | 0,1361891 | 3,1140823 | 0,0018452 | 0,0088024 | NRAS       |
| ENSGALG00000013194 | 2699,5463 | 0,423818786 | 0,1417822 | 2,9892249 | 0,0027969 | 0,0124483 | IRX1       |
| ENSGALG00000015903 | 1395,6597 | 0,423426358 | 0,1458209 | 2,9037432 | 0,0036873 | 0,0156395 | FILIP1     |
| ENSGALG00000012009 | 3507,1232 | 0,422977808 | 0,1235894 | 3,4224446 | 0,0006206 | 0,0035925 | JKAMP      |
| ENSGALG00000009107 | 1525,7253 | 0,422108392 | 0,149748  | 2,8187922 | 0,0048205 | 0,0194634 | NRXN1      |
| ENSGALG00000008257 | 1616,4159 | 0,421896886 | 0,1646167 | 2,5629047 | 0,0103801 | 0,036237  | MERTK      |
| ENSGALG00000027710 | 12308,995 | 0,421872733 | 0,1075864 | 3,9212473 | 8,81E-05  | 0,0006742 | DAG1       |
| ENSGALG00000000436 | 3616,9217 | 0,421563067 | 0,1280766 | 3,2914916 | 0,0009966 | 0,0053161 | RABIF      |
| ENSGALG00000008613 | 2544,3778 | 0,420884082 | 0,1331062 | 3,1620172 | 0,0015668 | 0,007729  | NDUFA1     |
| ENSGALG00000028302 | 1437,8585 | 0,420702301 | 0,1488301 | 2,826728  | 0,0047026 | 0,0190554 |            |
| ENSGALG00000012131 | 1906,2436 | 0,419815141 | 0,1493221 | 2,8114727 | 0,0049315 | 0,0198588 | ELOVL6     |
| ENSGALG00000009595 | 1381,8135 | 0,419771594 | 0,1544649 | 2,7175851 | 0,006576  | 0,0251107 | TWF1       |
| ENSGALG00000007619 | 4223,0444 | 0,419444023 | 0,1439729 | 2,9133548 | 0,0035757 | 0,015242  | UBALD1     |
| ENSGALG00000007025 | 838,27153 | 0,41933553  | 0,165861  | 2,5282343 | 0,0114638 | 0,0391176 | CPNE8      |
| ENSGALG00000007054 | 5550,7308 | 0,419262331 | 0,1227261 | 3,4162453 | 0,0006349 | 0,0036566 | TBC1D16    |
| ENSGALG00000017675 | 6606,9674 | 0,417757976 | 0,11207   | 3,7276537 | 0,0001933 | 0,0013256 | NDUFS8     |
| ENSGALG00000008818 | 5178,1883 | 0,417517144 | 0,1293144 | 3,2286974 | 0,0012436 | 0,0064011 | IDH1       |
| ENSGALG00000004038 | 1559,4978 | 0,417388311 | 0,1404734 | 2,9712977 | 0,0029654 | 0,0130493 | ADAL       |
| ENSGALG00000026394 | 6922,0955 | 0,417110916 | 0,1102725 | 3,782546  | 0,0001552 | 0,0010991 | CORO1B     |
| ENSGALG00000002840 | 4242,1731 | 0,415750464 | 0,1518147 | 2,7385381 | 0,0061713 | 0,0238158 | GRM4       |
| ENSGALG00000007220 | 48744,176 | 0,415111704 | 0,1048964 | 3,9573492 | 7,58E-05  | 0,0005879 | FTH1       |
| ENSGALG00000001816 | 2247,2353 | 0,414935997 | 0,1327278 | 3,1262169 | 0,0017707 | 0,0085128 | MAGI3      |
| ENSGALG00000028812 | 2137,7927 | 0,414162814 | 0,1436705 | 2,8827261 | 0,0039425 | 0,0164962 | CREBL2     |
| ENSGALG00000015352 | 2437,8785 | 0,413775598 | 0,1391873 | 2,9727977 | 0,002951  | 0,0130039 | GAK        |
| ENSGALG00000026802 | 39202,809 | 0,413746284 | 0,1146157 | 3,6098563 | 0,0003064 | 0,0019787 | TUBB2A     |
| ENSGALG00000015915 | 2924,5989 | 0,413737551 | 0,1308763 | 3,1612868 | 0,0015707 | 0,0077372 | TMEM64     |
| ENSGALG00000020626 | 1251,1665 | 0,41305269  | 0,1546192 | 2,6714191 | 0,0075531 | 0,0281203 | C3ORF55    |
| ENSGALG00000012426 | 3567,3724 | 0,412512543 | 0,125055  | 3,2986494 | 0,0009715 | 0,0052095 | DDHD1      |
| ENSGALG00000004918 | 890,67566 | 0,411822203 | 0,1629138 | 2,5278534 | 0,0114762 | 0,0391454 | RAB9B      |
| ENSGALG00000001201 | 7498,136  | 0,411468635 | 0,10775   | 3,8187341 | 0,0001341 | 0,0009682 | GFOD2      |
| ENSGALG00000024081 | 3055,1077 | 0,410810718 | 0,129763  | 3,1658532 | 0,0015463 | 0,0076361 |            |
| ENSGALG00000004873 | 2191,1914 | 0,410670756 | 0,1393688 | 2,9466478 | 0,0032124 | 0,0139255 | PHACTR3    |
| ENSGALG00000017405 | 1260,4536 | 0,410522272 | 0,1629615 | 2,5191367 | 0,0117643 | 0,0399927 | NPR3       |
| ENSGALG00000003750 | 7887,3706 | 0,409049332 | 0,1094937 | 3,7358254 | 0,0001871 | 0,0012918 | PLCG1      |
| ENSGALG00000016828 | 4406,9031 | 0,407053917 | 0,1467975 | 2,7728942 | 0,005556  | 0,0219007 | GRTP1      |
| ENSGALG00000000478 | 3159,4613 | 0,406777826 | 0,1532189 | 2,6548799 | 0,0079337 | 0,0292412 | TANC2      |
| ENSGALG00000015004 | 7430,1607 | 0,406416416 | 0,1365123 | 2,9771421 | 0,0029095 | 0,0128446 | RIOK3      |
| ENSGALG00000011488 | 1838,711  | 0,405575212 | 0,1659995 | 2,443232  | 0,0145564 | 0,0472207 | CMTM7      |
| ENSGALG00000008597 | 7184,8669 | 0,404910294 | 0,1198878 | 3,37741   | 0,0007317 | 0,0041252 | MRPL2      |
| ENSGALG00000006505 | 3147,8767 | 0,40439474  | 0,1221546 | 3,310517  | 0,0009312 | 0,0050493 | ZFAND6     |
| ENSGALG00000014981 | 1640,2876 | 0,404127478 | 0,1524452 | 2,6509683 | 0,0080261 | 0,0295009 | COX17      |
| ENSGALG00000008143 | 14658,924 | 0,402789538 | 0,1063945 | 3,7858132 | 0,0001532 | 0,0010858 | UACA       |
| ENSGALG00000003924 | 3485,2604 | 0,402077112 | 0,1262253 | 3,1853918 | 0,0014456 | 0,0072359 | ACBD6      |
| ENSGALG00000027768 | 2765,0207 | 0,401592495 | 0,1379224 | 2,9117282 | 0,0035944 | 0,0152976 | CTDSP1     |
| ENSGALG00000028931 | 2027,2809 | 0,401212621 | 0,1470133 | 2,7290911 | 0,0063509 | 0,0243915 | IGFBP4     |
| ENSGALG00000008508 | 3096,6728 | 0,401158456 | 0,1203234 | 3,3340018 | 0,0008561 | 0,004694  | PYGB       |
| ENSGALG00000010704 | 15057,888 | 0,401049242 | 0,1064765 | 3,7665529 | 0,0001655 | 0,001164  | GLCCI1     |
| ENSGALG00000003371 | 6971,3556 | 0,400787786 | 0,1174349 | 3,4128513 | 0,0006429 | 0,0036962 | ELL        |
| ENSGALG00000003575 | 5543,8738 | 0,400668854 | 0,1362202 | 2,9413311 | 0,003268  | 0,0141048 | DNTTIP1    |
| ENSGALG00000026316 | 1590,1424 | 0,400010985 | 0,1398143 | 2,8610159 | 0,0042229 | 0,017455  | TMEM136    |
| ENSGALG00000001473 | 2324,7953 | 0,399774883 | 0,1339201 | 2,9851752 | 0,0028342 | 0,0125732 | MIB2       |
| ENSGALG00000000253 | 2196,4708 | 0,399568995 | 0,1345932 | 2,9687154 | 0,0029905 | 0,0131255 | SLC25A46   |
| ENSGALG00000001096 | 5395,305  | 0,399476875 | 0,1210243 | 3,3007994 | 0,0009641 | 0,0051841 | AC005943.2 |
| ENSGALG00000002492 | 1100,2646 | 0,398681223 | 0,1527657 | 2,6097562 | 0,0090607 | 0,0324549 | H6PD       |

|                    |           |             |           |           |           |           |            |
|--------------------|-----------|-------------|-----------|-----------|-----------|-----------|------------|
| ENSGALG00000016191 | 3940,4435 | 0,398485008 | 0,1411098 | 2,8239358 | 0,0047438 | 0,0191937 | PKNOX1     |
| ENSGALG00000000972 | 1494,0966 | 0,398341588 | 0,1611855 | 2,4713244 | 0,0134614 | 0,0444414 | PBX3       |
| ENSGALG00000015961 | 15590,16  | 0,398310373 | 0,130734  | 3,0467236 | 0,0023135 | 0,0106334 | SUCLG1     |
| ENSGALG00000003412 | 4305,4895 | 0,398169298 | 0,118859  | 3,34993   | 0,0008083 | 0,0044792 | RALGDS     |
| ENSGALG00000016549 | 1882,0348 | 0,397970824 | 0,1562578 | 2,5468866 | 0,0108689 | 0,037606  | CTPS2      |
| ENSGALG00000004176 | 2961,1415 | 0,397874037 | 0,1416462 | 2,8089278 | 0,0049707 | 0,0199869 | ATOX1      |
| ENSGALG00000014970 | 13935,559 | 0,397421157 | 0,1074971 | 3,6970395 | 0,0002181 | 0,0014739 | FSTL1      |
| ENSGALG00000003422 | 9411,1693 | 0,397187449 | 0,1102449 | 3,6027755 | 0,0003148 | 0,0020238 | TRIM3      |
| ENSGALG00000017262 | 1782,0171 | 0,39670681  | 0,1365862 | 2,9044423 | 0,0036791 | 0,0156094 | NARS2      |
| ENSGALG00000006736 | 1555,2322 | 0,396360498 | 0,1559292 | 2,5419267 | 0,0110243 | 0,0380183 | AEN        |
| ENSGALG00000006889 | 2493,8401 | 0,396136143 | 0,1473921 | 2,6876356 | 0,007196  | 0,0270495 | TMC7       |
| ENSGALG00000014233 | 13243,506 | 0,394951392 | 0,1481986 | 2,6650135 | 0,0076985 | 0,0286146 | FBLN1      |
| ENSGALG00000005046 | 2539,1359 | 0,394497591 | 0,1359729 | 2,9012952 | 0,0037162 | 0,0157524 | SHMT1      |
| ENSGALG00000001572 | 4170,7383 | 0,394480266 | 0,1178093 | 3,3484648 | 0,0008126 | 0,0044938 | COMMD4     |
| ENSGALG00000028470 | 5093,1917 | 0,39443368  | 0,1241813 | 3,1762725 | 0,0014918 | 0,007402  | GSR        |
| ENSGALG00000005675 | 3085,819  | 0,394073439 | 0,1342631 | 2,9350829 | 0,0033346 | 0,014349  | PTTG1IP    |
| ENSGALG00000021047 | 9190,8891 | 0,393972396 | 0,122897  | 3,2057124 | 0,0013473 | 0,0068343 | KIFAP3     |
| ENSGALG00000008039 | 2411,3069 | 0,392392533 | 0,1551271 | 2,5294903 | 0,0114228 | 0,0390268 | MFSD13A    |
| ENSGALG00000008050 | 1623,9365 | 0,391124824 | 0,1411515 | 2,7709581 | 0,0055892 | 0,0219805 | HBP1       |
| ENSGALG00000013348 | 2256,8618 | 0,390928939 | 0,128295  | 3,0471095 | 0,0023105 | 0,0106241 | OTUD7B     |
| ENSGALG00000010490 | 10248,566 | 0,389494511 | 0,1117875 | 3,4842389 | 0,0004935 | 0,002968  | DPYSL4     |
| ENSGALG00000013000 | 7034,8497 | 0,388948819 | 0,1248778 | 3,1146355 | 0,0018417 | 0,008789  | ADIPOR2    |
| ENSGALG00000026095 | 1420,7135 | 0,388637494 | 0,1454616 | 2,6717534 | 0,0075456 | 0,0281076 | CDC26      |
| ENSGALG00000000955 | 5256,5616 | 0,388613492 | 0,1145617 | 3,3921753 | 0,0006934 | 0,0039501 | TMEM222    |
| ENSGALG00000011035 | 1343,9931 | 0,388589204 | 0,1474226 | 2,6358867 | 0,0083918 | 0,0305819 | AK4        |
| ENSGALG00000008386 | 1936,8714 | 0,388150893 | 0,1387904 | 2,7966699 | 0,0051632 | 0,0205937 | KIZ        |
| ENSGALG00000015311 | 2435,4616 | 0,387705603 | 0,1261741 | 3,0727833 | 0,0021207 | 0,009926  | RNF38      |
| ENSGALG00000014496 | 6279,2131 | 0,385917845 | 0,134402  | 2,8713694 | 0,004087  | 0,0169958 | PROM1      |
| ENSGALG00000004011 | 4239,1769 | 0,385892717 | 0,1224058 | 3,1525685 | 0,0016184 | 0,0079204 | CAMKK2     |
| ENSGALG00000005337 | 6236,1037 | 0,385644449 | 0,1096926 | 3,5156828 | 0,0004386 | 0,0026828 | SNX2       |
| ENSGALG00000004086 | 6417,7852 | 0,385423377 | 0,1245819 | 3,0937355 | 0,0019765 | 0,0093504 | CHMP1B     |
| ENSGALG00000026102 | 19802,423 | 0,385336727 | 0,121726  | 3,1656082 | 0,0015476 | 0,0076398 | CHTOP      |
| ENSGALG00000015898 | 1319,6724 | 0,384642657 | 0,1580612 | 2,4335051 | 0,0149534 | 0,0482633 | MYO6       |
| ENSGALG00000016639 | 3515,2869 | 0,384196385 | 0,1227968 | 3,1287174 | 0,0017557 | 0,0084616 | KIF13B     |
| ENSGALG00000026188 | 5641,8964 | 0,384179427 | 0,1152566 | 3,3332525 | 0,0008584 | 0,0047048 | TMEM8A     |
| ENSGALG00000008736 | 6339,8487 | 0,384117634 | 0,1174006 | 3,271854  | 0,0010684 | 0,0056493 | PNPLA7     |
| ENSGALG00000020005 | 6706,2183 | 0,383841955 | 0,130019  | 2,9521995 | 0,0031552 | 0,0137158 | SFT2D1     |
| ENSGALG00000014808 | 2216,3488 | 0,383214364 | 0,1540134 | 2,488189  | 0,0128395 | 0,0428667 | USF3       |
| ENSGALG00000001536 | 1337,5687 | 0,382405736 | 0,149925  | 2,5506477 | 0,0107523 | 0,0372615 | ARHGAP39   |
| ENSGALG00000028635 | 2927,7161 | 0,382285105 | 0,1328162 | 2,8783008 | 0,0039982 | 0,0166777 | C9ORF58    |
| ENSGALG00000000456 | 4419,0221 | 0,381123553 | 0,1256788 | 3,0325206 | 0,0024252 | 0,0110469 | MRPS21     |
| ENSGALG00000011325 | 5273,0258 | 0,380378399 | 0,1366737 | 2,7831135 | 0,005384  | 0,0213339 | NDUFA12    |
| ENSGALG00000008297 | 4909,6132 | 0,379216929 | 0,1148855 | 3,3008262 | 0,000964  | 0,0051841 | SEMA4B     |
| ENSGALG00000001166 | 2588,454  | 0,378691011 | 0,1266846 | 2,9892423 | 0,0027967 | 0,0124483 | GATSL2     |
| ENSGALG00000007205 | 14498,189 | 0,37857906  | 0,1049589 | 3,6069259 | 0,0003098 | 0,0019961 | COX6A1     |
| ENSGALG00000015958 | 3885,4269 | 0,378120956 | 0,1313335 | 2,8790889 | 0,0039883 | 0,0166514 | EIF2AK3    |
| ENSGALG00000028128 | 3864,6629 | 0,378077792 | 0,1172702 | 3,2239889 | 0,0012642 | 0,0064852 | HOXD8      |
| ENSGALG00000015436 | 20607,243 | 0,377556464 | 0,1126811 | 3,3506644 | 0,0008062 | 0,0044728 | SDCBP      |
| ENSGALG00000002053 | 9601,2632 | 0,376194926 | 0,1115908 | 3,3711997 | 0,0007484 | 0,0042037 | POR        |
| ENSGALG00000027416 | 1624,7836 | 0,375994995 | 0,1449326 | 2,5942749 | 0,0094791 | 0,0336613 | ROMO1L     |
| ENSGALG00000002959 | 3279,2685 | 0,375394519 | 0,1495524 | 2,5101204 | 0,012069  | 0,0407741 | NRBF2      |
| ENSGALG00000009948 | 1430,5348 | 0,375138393 | 0,1485226 | 2,5258008 | 0,0115435 | 0,0393305 | HHIP       |
| ENSGALG00000023180 | 1278,6895 | 0,374920803 | 0,1483185 | 2,527809  | 0,0114777 | 0,0391454 |            |
| ENSGALG00000004191 | 5196,6988 | 0,374652449 | 0,1167651 | 3,2086007 | 0,0013338 | 0,0067774 | RIC8A      |
| ENSGALG00000009959 | 1836,2989 | 0,374451686 | 0,1402648 | 2,6696054 | 0,007594  | 0,0282649 | AC025263.3 |
| ENSGALG00000003717 | 5316,7007 | 0,373543889 | 0,1130969 | 3,3028656 | 0,000957  | 0,0051565 | MYO9B      |
| ENSGALG00000004324 | 3684,0767 | 0,373249102 | 0,1339589 | 2,7862949 | 0,0053314 | 0,0211564 | SETD1B     |
| ENSGALG00000008438 | 6164,0602 | 0,373204358 | 0,1216092 | 3,0688816 | 0,0021486 | 0,0100141 | SLC35C1    |
| ENSGALG00000001032 | 4578,5026 | 0,373005757 | 0,1227121 | 3,039681  | 0,0023683 | 0,010842  | STUB1      |
| ENSGALG00000026291 | 5117,1597 | 0,37266418  | 0,1170472 | 3,1838789 | 0,0014532 | 0,0072578 | CDH3       |
| ENSGALG00000026421 | 20179,815 | 0,372144283 | 0,1169454 | 3,1822057 | 0,0014616 | 0,0072865 | PSMB2      |
| ENSGALG00000002990 | 14374,489 | 0,371847834 | 0,1302887 | 2,8540301 | 0,0043168 | 0,017756  | PRELID1    |



|                    |           |             |           |           |           |           |                |
|--------------------|-----------|-------------|-----------|-----------|-----------|-----------|----------------|
| ENSGALG00000002605 | 7879,732  | 0,371275034 | 0,1234991 | 3,006297  | 0,0026445 | 0,0118554 | MRPL17         |
| ENSGALG00000009073 | 2474,3956 | 0,370739827 | 0,1479952 | 2,5050805 | 0,0122424 | 0,0412267 | PSEN2          |
| ENSGALG00000004357 | 2772,1991 | 0,370669228 | 0,1314113 | 2,8206804 | 0,0047922 | 0,019355  | ANXA6          |
| ENSGALG00000016850 | 6183,7618 | 0,369402589 | 0,1221012 | 3,0253801 | 0,0024832 | 0,0112659 | ANKRD10        |
| ENSGALG00000015543 | 2204,9702 | 0,369304606 | 0,1292142 | 2,8580804 | 0,0042621 | 0,0175766 | MRPL50         |
| ENSGALG00000003185 | 3436,5941 | 0,368988195 | 0,1514261 | 2,4367543 | 0,0148197 | 0,0479038 | SCPEP1         |
| ENSGALG00000015537 | 3286,5424 | 0,368709498 | 0,1440858 | 2,5589581 | 0,0104986 | 0,036576  | MAN2B2         |
| ENSGALG00000006857 | 3516,2609 | 0,36847671  | 0,1191186 | 3,0933594 | 0,001979  | 0,0093558 | SPATA20        |
| ENSGALG00000026716 | 2067,7158 | 0,368315116 | 0,1476133 | 2,4951349 | 0,0125909 | 0,042223  | CELF5          |
| ENSGALG00000000747 | 4334,9927 | 0,36652476  | 0,1212386 | 3,0231688 | 0,0025014 | 0,0113184 | CHD5           |
| ENSGALG00000028249 | 8201,3974 | 0,366515679 | 0,1075014 | 3,409405  | 0,000651  | 0,0037354 | MCL1           |
| ENSGALG00000006149 | 3876,2934 | 0,366158451 | 0,1322855 | 2,7679406 | 0,0056412 | 0,0221403 | MORN4          |
| ENSGALG00000012952 | 17818,525 | 0,365044211 | 0,1286631 | 2,8372099 | 0,004551  | 0,0185125 | BASP1          |
| ENSGALG00000013848 | 3142,0736 | 0,364984572 | 0,1264318 | 2,8868109 | 0,0038917 | 0,0163434 | MVK            |
| ENSGALG00000010621 | 3304,8585 | 0,364976716 | 0,1292617 | 2,8235486 | 0,0047495 | 0,0192112 | DPY30          |
| ENSGALG00000015663 | 10480,988 | 0,363842291 | 0,1220245 | 2,9817148 | 0,0028664 | 0,0126913 | HSDL2          |
| ENSGALG00000001597 | 12155,403 | 0,36336647  | 0,135585  | 2,6799894 | 0,0073624 | 0,027546  | PSMB3          |
| ENSGALG00000013876 | 3474,876  | 0,361738997 | 0,1264822 | 2,8599989 | 0,0042364 | 0,0174997 | FAM136A        |
| ENSGALG00000021692 | 6544,9246 | 0,361385734 | 0,1165284 | 3,1012667 | 0,0019269 | 0,0091476 | AC024592.12    |
| ENSGALG00000016333 | 1977,9922 | 0,361282215 | 0,1426527 | 2,5326003 | 0,011322  | 0,0387796 | MTSS1          |
| ENSGALG00000005704 | 10751,887 | 0,361085404 | 0,1196869 | 3,0169164 | 0,0025536 | 0,0115009 | RP11-411B6.6   |
| ENSGALG00000006630 | 3807,9216 | 0,360923749 | 0,1347522 | 2,6784253 | 0,0073969 | 0,0276565 | COMMD7         |
| ENSGALG00000014589 | 16537,437 | 0,360345797 | 0,1177437 | 3,0604243 | 0,0022102 | 0,0102529 |                |
| ENSGALG00000007589 | 8938,4163 | 0,360072922 | 0,1085811 | 3,3161649 | 0,0009126 | 0,0049604 | DEDD           |
| ENSGALG00000011435 | 8069,4783 | 0,35897775  | 0,1123046 | 3,1964666 | 0,0013912 | 0,0070167 | ELK3           |
| ENSGALG00000010171 | 1427,5927 | 0,358902977 | 0,1475799 | 2,4319235 | 0,0150189 | 0,048421  | NFKBIE         |
| ENSGALG00000001330 | 11236,984 | 0,358718136 | 0,1146464 | 3,128908  | 0,0017546 | 0,0084616 | ATP5G1         |
| ENSGALG00000006143 | 4041,5216 | 0,358630949 | 0,1180875 | 3,0369922 | 0,0023895 | 0,0109172 | RP11-548K23.11 |
| ENSGALG00000002159 | 5312,4581 | 0,35820654  | 0,1168583 | 3,0653076 | 0,0021745 | 0,0101146 | ACOX1          |
| ENSGALG00000005478 | 5105,9851 | 0,35705086  | 0,1183988 | 3,015662  | 0,0025642 | 0,011541  | SNX7           |
| ENSGALG00000026531 | 11386,746 | 0,356957338 | 0,1206613 | 2,9583418 | 0,003093  | 0,0135058 | CHST14         |
| ENSGALG00000026517 | 6681,3961 | 0,355711572 | 0,1112537 | 3,1973011 | 0,0013872 | 0,0070029 | RFC5           |
| ENSGALG00000011176 | 5734,5779 | 0,354690121 | 0,1402295 | 2,5293538 | 0,0114273 | 0,0390322 | SCRN1          |
| ENSGALG00000003096 | 2680,9001 | 0,354610608 | 0,1443928 | 2,455874  | 0,0140542 | 0,045942  | CBFA2T2        |
| ENSGALG00000001425 | 2462,9176 | 0,354258416 | 0,1359645 | 2,6055206 | 0,0091735 | 0,0327727 | SNX19          |
| ENSGALG00000023073 | 19350,483 | 0,353608475 | 0,1057356 | 3,3442711 | 0,000825  | 0,004546  | AKAP12         |
| ENSGALG00000013036 | 6599,1108 | 0,353370495 | 0,1362318 | 2,5938909 | 0,0094897 | 0,0336858 | ATP6V1E1       |
| ENSGALG00000014891 | 4747,3286 | 0,353275878 | 0,1368587 | 2,5813185 | 0,0098424 | 0,034752  | PELO           |
| ENSGALG00000026600 | 7491,3546 | 0,352554713 | 0,1374236 | 2,5654603 | 0,0103039 | 0,0360174 |                |
| ENSGALG00000026565 | 5799,2794 | 0,352044819 | 0,1113845 | 3,1606258 | 0,0015743 | 0,007752  | ENSA           |
| ENSGALG00000007396 | 5182,898  | 0,351138505 | 0,1196447 | 2,9348426 | 0,0033372 | 0,0143556 | TAOK3          |
| ENSGALG00000012229 | 22179,4   | 0,350504617 | 0,1021787 | 3,430311  | 0,0006029 | 0,0035093 | RPS29          |
| ENSGALG00000007305 | 2042,815  | 0,350349865 | 0,1310633 | 2,6731358 | 0,0075146 | 0,0280151 | NME1           |
| ENSGALG00000000461 | 6717,843  | 0,348147161 | 0,1224667 | 2,8427896 | 0,0044721 | 0,0182515 | MRC2           |
| ENSGALG00000016241 | 5823,7161 | 0,347015145 | 0,1359999 | 2,5515842 | 0,0107234 | 0,0372068 | ATP6AP2        |
| ENSGALG00000001381 | 43057,795 | 0,34689365  | 0,1163519 | 2,9814171 | 0,0028692 | 0,0126954 | ACTG1          |
| ENSGALG00000010347 | 11028,081 | 0,346318448 | 0,1080262 | 3,2058747 | 0,0013465 | 0,0068343 | CCNG2          |
| ENSGALG00000005135 | 11151,897 | 0,345569481 | 0,1285407 | 2,688405  | 0,0071794 | 0,0270058 | SERPINE2       |
| ENSGALG00000026300 | 11402,689 | 0,345400821 | 0,1081778 | 3,1928993 | 0,0014085 | 0,0070895 |                |
| ENSGALG00000020922 | 2968,9637 | 0,345299483 | 0,1246827 | 2,769425  | 0,0056155 | 0,0220587 | C1orf21        |
| ENSGALG00000023447 | 10483,165 | 0,344836567 | 0,1046431 | 3,2953598 | 0,000983  | 0,0052585 | RP11-343C2.11  |
| ENSGALG00000013563 | 2902,2623 | 0,344320197 | 0,1287254 | 2,6748425 | 0,0074764 | 0,0278962 | CCDC102A       |
| ENSGALG00000002484 | 4545,8313 | 0,343583814 | 0,1190666 | 2,8856437 | 0,0039061 | 0,0163839 | CRYM           |
| ENSGALG00000003215 | 4360,1328 | 0,343135123 | 0,1166654 | 2,9411903 | 0,0032695 | 0,0141048 | PEF1           |
| ENSGALG00000016665 | 8909,5125 | 0,342839663 | 0,1328584 | 2,5804883 | 0,0098661 | 0,0347816 | FDFT1          |
| ENSGALG00000026203 | 4631,9513 | 0,341949081 | 0,1195864 | 2,8594311 | 0,004244  | 0,0175151 | FAM174A        |
| ENSGALG00000012586 | 2037,1791 | 0,341920905 | 0,1360582 | 2,5130482 | 0,0119693 | 0,0405176 | GKAP1          |
| ENSGALG00000003293 | 12978,607 | 0,341652813 | 0,1149964 | 2,9709875 | 0,0029684 | 0,0130583 | MBTPS1         |
| ENSGALG00000012770 | 2998,9246 | 0,340485203 | 0,1279524 | 2,6610294 | 0,0077902 | 0,028853  | MAK            |
| ENSGALG00000013784 | 13631,601 | 0,339967639 | 0,1079829 | 3,1483476 | 0,001642  | 0,0080213 | CDT1           |
| ENSGALG00000006837 | 2354,847  | 0,339965168 | 0,1390009 | 2,4457766 | 0,0144541 | 0,0469446 | TSPAN4         |
| ENSGALG00000006463 | 6778,1634 | 0,33979504  | 0,1341936 | 2,5321248 | 0,0113374 | 0,0388225 | TMA7           |

|                    |           |             |           |           |           |           |              |
|--------------------|-----------|-------------|-----------|-----------|-----------|-----------|--------------|
| ENSGALG00000000833 | 15942,313 | 0,339708342 | 0,1136284 | 2,9896436 | 0,002793  | 0,0124394 | IK           |
| ENSGALG00000015998 | 9692,1223 | 0,339150714 | 0,1058855 | 3,2029939 | 0,0013601 | 0,0068915 | PTDSS1       |
| ENSGALG00000006056 | 5221,8645 | 0,338801705 | 0,1296    | 2,6142105 | 0,0089434 | 0,0321363 | CHCHD6       |
| ENSGALG00000027609 | 5715,7167 | 0,338322071 | 0,1138079 | 2,9727469 | 0,0029515 | 0,0130039 | RAB40C       |
| ENSGALG00000024261 | 6604,4448 | 0,336614329 | 0,1086574 | 3,0979431 | 0,0019487 | 0,0092412 | NHP2         |
| ENSGALG00000001476 | 3822,0948 | 0,335505795 | 0,1349976 | 2,485273  | 0,0129452 | 0,0430927 | RAP1A        |
| ENSGALG00000001329 | 7967,7759 | 0,33542437  | 0,1280369 | 2,6197481 | 0,0087995 | 0,0317532 | EPB41        |
| ENSGALG00000012093 | 2809,4561 | 0,335251509 | 0,1300305 | 2,5782533 | 0,0099301 | 0,0349712 | ELMO1        |
| ENSGALG00000002157 | 23751,205 | 0,335162629 | 0,1132861 | 2,958549  | 0,0030909 | 0,013501  | RPS17        |
| ENSGALG00000011476 | 10900,501 | 0,334810497 | 0,1121934 | 2,9842264 | 0,002843  | 0,0125999 | sept-11      |
| ENSGALG00000012277 | 5198,3118 | 0,33449799  | 0,122213  | 2,7370074 | 0,0062001 | 0,0239052 | MAFF         |
| ENSGALG00000024033 | 5551,4467 | 0,334154631 | 0,1192958 | 2,8010587 | 0,0050935 | 0,0203689 | PHLDB1       |
| ENSGALG00000012312 | 5618,5193 | 0,333752483 | 0,1164047 | 2,8671731 | 0,0041416 | 0,017158  | GCAT         |
| ENSGALG00000007519 | 2801,5468 | 0,333421083 | 0,1296588 | 2,5715271 | 0,0101251 | 0,0355292 | ACBD5        |
| ENSGALG00000009234 | 2846,7839 | 0,332951253 | 0,1239542 | 2,6860825 | 0,0072295 | 0,0271531 | RP11-20I23.3 |
| ENSGALG00000006546 | 6021,0715 | 0,332225604 | 0,1201276 | 2,765605  | 0,0056817 | 0,0222545 | CD81         |
| ENSGALG00000003934 | 3446,0691 | 0,332093035 | 0,1296938 | 2,5605934 | 0,0104494 | 0,0364416 | WIPF2        |
| ENSGALG00000013529 | 4334,8333 | 0,331833816 | 0,1204748 | 2,7543838 | 0,0058803 | 0,02288   | NUP210L      |
| ENSGALG00000014236 | 4088,5792 | 0,331720827 | 0,1185166 | 2,7989389 | 0,0051271 | 0,0204647 | ATP8A1       |
| ENSGALG00000001761 | 3252,5626 | 0,33061823  | 0,1263585 | 2,6165091 | 0,0088834 | 0,0319713 | HAUS1        |
| ENSGALG00000000905 | 28204,583 | 0,330518761 | 0,1072649 | 3,0813327 | 0,0020608 | 0,0096783 | PSMB4        |
| ENSGALG00000000055 | 4657,6107 | 0,330211238 | 0,1218412 | 2,7101775 | 0,0067247 | 0,0256032 | LAMTOR3      |
| ENSGALG00000002967 | 2956,1697 | 0,329951632 | 0,1271164 | 2,5956654 | 0,0094408 | 0,0335537 | ZNF365       |
| ENSGALG00000008457 | 3707,8992 | 0,329256556 | 0,1280479 | 2,5713549 | 0,0101301 | 0,0355377 | RIN2         |
| ENSGALG00000015844 | 18562,8   | 0,329214954 | 0,1087925 | 3,0260806 | 0,0024775 | 0,0112473 | SOD1         |
| ENSGALG00000000629 | 2184,8298 | 0,329174801 | 0,1291076 | 2,5496155 | 0,0107842 | 0,0373494 |              |
| ENSGALG00000010109 | 8235,1722 | 0,328812909 | 0,1134692 | 2,8978173 | 0,0037577 | 0,0158984 | RNF220       |
| ENSGALG00000029052 | 4904,723  | 0,328574855 | 0,1134688 | 2,8957295 | 0,0037828 | 0,0159748 | CERS2L1      |
| ENSGALG00000003331 | 9717,1633 | 0,328559948 | 0,1145187 | 2,8690497 | 0,0041171 | 0,0171    | FAF2         |
| ENSGALG00000002919 | 3330,9646 | 0,328149978 | 0,1337566 | 2,4533361 | 0,0141538 | 0,0462009 | MON1A        |
| ENSGALG00000007272 | 8940,9306 | 0,327852784 | 0,1056422 | 3,1034251 | 0,0019129 | 0,0090938 | RNF166       |
| ENSGALG00000001604 | 7206,5279 | 0,327620067 | 0,1148758 | 2,8519514 | 0,0043452 | 0,0178353 |              |
| ENSGALG00000010441 | 3362,4409 | 0,327510367 | 0,1300487 | 2,5183664 | 0,0117901 | 0,0400403 | GYG1         |
| ENSGALG00000008966 | 9784,0345 | 0,327459196 | 0,1078303 | 3,0368019 | 0,002391  | 0,0109204 | FBXW5        |
| ENSGALG00000006439 | 2469,3771 | 0,325297261 | 0,1285361 | 2,5307849 | 0,0113808 | 0,0389417 | ARHGEF6      |
| ENSGALG00000004000 | 3131,3983 | 0,325159334 | 0,1227269 | 2,6494547 | 0,0080622 | 0,0295947 | FLOT2        |
| ENSGALG00000008925 | 2847,1933 | 0,32505073  | 0,1271866 | 2,555699  | 0,0105975 | 0,0368637 | TMEM203      |
| ENSGALG00000006161 | 2625,1209 | 0,324498322 | 0,1340451 | 2,4208145 | 0,0154858 | 0,0496386 | CHMP1A       |
| ENSGALG00000004899 | 7704,948  | 0,323966145 | 0,1311985 | 2,469283  | 0,0135384 | 0,0446201 | PEPD         |
| ENSGALG00000013039 | 15959,11  | 0,323619    | 0,1177645 | 2,7480188 | 0,0059957 | 0,0232434 | BID          |
| ENSGALG00000014555 | 6185,863  | 0,32349139  | 0,119778  | 2,7007582 | 0,0069182 | 0,0261637 | C12orf57     |
| ENSGALG00000015259 | 6306,083  | 0,322565394 | 0,1124418 | 2,8687313 | 0,0041212 | 0,0171086 | RB1CC1       |
| ENSGALG00000015828 | 4399,085  | 0,322397999 | 0,1225293 | 2,6311901 | 0,0085086 | 0,030896  | BACH1        |
| ENSGALG00000010985 | 3705,9823 | 0,321700662 | 0,1306157 | 2,462956  | 0,0137797 | 0,0451855 | ATG4C        |
| ENSGALG00000028499 | 5696,2423 | 0,321645303 | 0,1148381 | 2,8008589 | 0,0050967 | 0,0203732 | FAM63A       |
| ENSGALG00000013738 | 7162,7044 | 0,321523306 | 0,1318588 | 2,4383909 | 0,0147528 | 0,0477354 | OPTN         |
| ENSGALG00000025781 | 5021,0191 | 0,321200342 | 0,1135034 | 2,8298746 | 0,0046566 | 0,0188803 | CERS2L2      |
| ENSGALG00000028937 | 3780,2165 | 0,321152786 | 0,1241263 | 2,5873067 | 0,0096729 | 0,0342248 | TIMM13       |
| ENSGALG00000008443 | 36760,133 | 0,321038212 | 0,1010416 | 3,1772886 | 0,0014866 | 0,0073788 | ARHGDIA      |
| ENSGALG00000003513 | 5800,0504 | 0,320426255 | 0,1140656 | 2,8091408 | 0,0049674 | 0,0199796 | KLHL20       |
| ENSGALG00000014682 | 2661,1178 | 0,320335943 | 0,1298503 | 2,4669635 | 0,0136264 | 0,044845  | CAST         |
| ENSGALG00000005701 | 4780,9727 | 0,319914204 | 0,1181292 | 2,708173  | 0,0067655 | 0,0257069 | IP6K2        |
| ENSGALG00000016172 | 54051,231 | 0,319415143 | 0,1086593 | 2,9396034 | 0,0032863 | 0,0141682 | RPLP1        |
| ENSGALG00000012843 | 3927,8364 | 0,319142472 | 0,131197  | 2,4325431 | 0,0149932 | 0,0483612 | GMDS         |
| ENSGALG00000015664 | 24898,273 | 0,319058165 | 0,1003222 | 3,1803344 | 0,0014711 | 0,0073203 | ADD1         |
| ENSGALG00000012546 | 35449,688 | 0,318249627 | 0,099977  | 3,1832278 | 0,0014564 | 0,0072688 | MCM5         |
| ENSGALG00000011192 | 4976,6178 | 0,317451368 | 0,1192137 | 2,6628766 | 0,0077476 | 0,0287264 | PHF10        |
| ENSGALG00000002595 | 4724,8428 | 0,316793207 | 0,1219683 | 2,5973403 | 0,0093949 | 0,0334059 |              |
| ENSGALG00000011238 | 46142,463 | 0,316616268 | 0,1021796 | 3,0986245 | 0,0019442 | 0,0092232 | WLS          |
| ENSGALG00000013242 | 4048,7621 | 0,316427862 | 0,1207163 | 2,621252  | 0,0087607 | 0,0316302 | MRPL24       |
| ENSGALG00000002891 | 7363,8293 | 0,315737267 | 0,1107929 | 2,8497977 | 0,0043747 | 0,0179348 | ACADL        |
| ENSGALG00000023308 | 5464,7909 | 0,314498813 | 0,1190501 | 2,6417343 | 0,0082483 | 0,0301558 | NPB          |

|                    |           |              |           |           |           |           |               |
|--------------------|-----------|--------------|-----------|-----------|-----------|-----------|---------------|
| ENSGALG00000020078 | 34717,171 | 0,313921783  | 0,0988798 | 3,174781  | 0,0014995 | 0,007432  |               |
| ENSGALG00000028600 | 142500,09 | 0,313870865  | 0,0985585 | 3,1846146 | 0,0014495 | 0,00725   |               |
| ENSGALG00000011106 | 5264,4735 | 0,312738357  | 0,1159112 | 2,698085  | 0,006974  | 0,0263167 | GALNT2        |
| ENSGALG00000006880 | 22127,188 | 0,310525591  | 0,1109413 | 2,7990071 | 0,005126  | 0,0204647 | SLC38A10      |
| ENSGALG00000011958 | 2755,4733 | 0,30674184   | 0,1239537 | 2,4746489 | 0,0133367 | 0,0441477 | TEF           |
| ENSGALG00000008586 | 62912,793 | 0,306372777  | 0,1047411 | 2,9250486 | 0,003444  | 0,0147454 | TUBB4B        |
| ENSGALG00000003691 | 21366,038 | 0,306291187  | 0,1008897 | 3,0359009 | 0,0023982 | 0,0109384 | RNF145        |
| ENSGALG00000014190 | 4272,095  | 0,305976217  | 0,1248086 | 2,4515639 | 0,0142237 | 0,0463753 | PNPLA3        |
| ENSGALG00000003428 | 8918,8411 | 0,30596567   | 0,1074998 | 2,8461972 | 0,0044245 | 0,0181062 | PIK3R2        |
| ENSGALG00000010997 | 7028,5315 | 0,305349661  | 0,119889  | 2,5469371 | 0,0108673 | 0,037606  | DFNA5         |
| ENSGALG00000001024 | 11719,39  | 0,304587459  | 0,1095728 | 2,779773  | 0,0054397 | 0,0215357 | TPRG1L        |
| ENSGALG00000004898 | 4936,2049 | 0,304436049  | 0,1215502 | 2,5046118 | 0,0122586 | 0,0412712 |               |
| ENSGALG00000015273 | 5611,3118 | 0,304040992  | 0,1190879 | 2,5530798 | 0,0106775 | 0,0370663 | TBC1D23       |
| ENSGALG00000000606 | 4262,8792 | 0,302883764  | 0,1188851 | 2,5477019 | 0,0108435 | 0,0375373 | ARL8A         |
| ENSGALG00000002712 | 8556,0623 | 0,302868054  | 0,1070979 | 2,8279558 | 0,0046846 | 0,0189881 | LIPG          |
| ENSGALG00000014118 | 12062,787 | 0,302595823  | 0,1052318 | 2,8755167 | 0,0040337 | 0,0167998 | MRPS26        |
| ENSGALG00000000094 | 5913,4414 | 0,30200193   | 0,1190933 | 2,5358428 | 0,0112177 | 0,0385193 | ADIPOR1       |
| ENSGALG00000000970 | 7143,9739 | 0,300853659  | 0,1087984 | 2,7652385 | 0,0056881 | 0,0222705 | CHEK1         |
| ENSGALG00000006876 | 3198,9684 | 0,300817961  | 0,1240621 | 2,4247362 | 0,0153195 | 0,0491923 | CTSA          |
| ENSGALG00000015211 | 3091,6006 | 0,300524293  | 0,1216505 | 2,4703913 | 0,0134965 | 0,0445036 | DTNA          |
| ENSGALG00000004156 | 5252,3729 | 0,300005854  | 0,114727  | 2,6149543 | 0,0089239 | 0,0320918 | KIF1BP        |
| ENSGALG00000003973 | 3666,163  | 0,297790777  | 0,1193872 | 2,4943284 | 0,0126196 | 0,0422982 | TLCD1         |
| ENSGALG00000027838 | 4595,5664 | 0,29706177   | 0,1173947 | 2,5304523 | 0,0113916 | 0,0389591 | HMG20B        |
| ENSGALG00000002279 | 6077,2003 | 0,297008819  | 0,1136905 | 2,6124335 | 0,00899   | 0,0322612 | CTD-2116N17.1 |
| ENSGALG00000017249 | 12265,651 | 0,295667982  | 0,1084027 | 2,7274952 | 0,0063817 | 0,0244959 | PCF11         |
| ENSGALG00000009570 | 6991,744  | 0,29562858   | 0,1160829 | 2,5467029 | 0,0108746 | 0,0376163 | ATP6V1D       |
| ENSGALG00000001913 | 13013,108 | 0,29356182   | 0,1209326 | 2,4274828 | 0,015204  | 0,048879  | DYNLRB1       |
| ENSGALG00000000944 | 3984,6591 | 0,29296383   | 0,1166894 | 2,5106287 | 0,0120516 | 0,0407356 | SUPT4H1       |
| ENSGALG00000014408 | 16252,764 | 0,292920829  | 0,1032929 | 2,8358262 | 0,0045707 | 0,0185874 | LLGL1         |
| ENSGALG00000023975 | 11745,641 | 0,291584025  | 0,1045871 | 2,7879551 | 0,0053042 | 0,0210728 | SLC25A39      |
| ENSGALG00000028356 | 9980,9657 | 0,288424278  | 0,1104192 | 2,6120845 | 0,0089992 | 0,0322857 | LMAN2         |
| ENSGALG00000006904 | 13921,155 | 0,287723415  | 0,1047262 | 2,7473884 | 0,0060072 | 0,0232815 | RNH1          |
| ENSGALG00000008865 | 4561,3827 | 0,286783741  | 0,1175361 | 2,4399621 | 0,0146888 | 0,0475709 | HDHD3         |
| ENSGALG00000013341 | 5963,8498 | 0,285851588  | 0,116546  | 2,4526925 | 0,0141791 | 0,0462726 | AGAP3         |
| ENSGALG00000007250 | 25520,219 | 0,285601509  | 0,1086627 | 2,6283308 | 0,0085805 | 0,0311198 | SNRPB         |
| ENSGALG00000021242 | 6224,5764 | 0,284935514  | 0,1141595 | 2,4959426 | 0,0125623 | 0,0421581 | PHPT1         |
| ENSGALG00000004410 | 6738,2931 | 0,28304622   | 0,1082646 | 2,6143925 | 0,0089386 | 0,0321276 | ANAPC16       |
| ENSGALG00000006073 | 7325,56   | 0,281547021  | 0,1095092 | 2,5709901 | 0,0101408 | 0,0355602 | NDUFAB1       |
| ENSGALG00000009940 | 12012,29  | 0,281084158  | 0,1035397 | 2,7147474 | 0,0066326 | 0,0253092 | SLC35E3       |
| ENSGALG00000014800 | 8363,7154 | 0,280973212  | 0,1136279 | 2,4727492 | 0,0134078 | 0,0443399 | ATP6V1A       |
| ENSGALG00000014467 | 5734,7231 | 0,280861046  | 0,1140326 | 2,462989  | 0,0137784 | 0,0451855 | COPS7A        |
| ENSGALG00000006917 | 6209,9134 | 0,280478545  | 0,1125356 | 2,4923538 | 0,01269   | 0,0424526 | CHKA          |
| ENSGALG00000001026 | 9235,9335 | 0,279930511  | 0,1055048 | 2,65325   | 0,0079721 | 0,0293748 | EPB41L1       |
| ENSGALG00000007260 | 8065,1993 | 0,279432916  | 0,1094636 | 2,5527474 | 0,0106877 | 0,0370923 | ZEB1          |
| ENSGALG00000014004 | 8156,8334 | 0,27938572   | 0,1132363 | 2,4672797 | 0,0136144 | 0,0448342 | EPB41L2       |
| ENSGALG00000002546 | 9375,5325 | 0,275701764  | 0,1107787 | 2,4887613 | 0,0128189 | 0,0428188 | COL5A1        |
| ENSGALG00000005138 | 8773,7935 | 0,274876887  | 0,1065601 | 2,5795489 | 0,0098929 | 0,0348493 | KCTD10        |
| ENSGALG00000003625 | 7388,448  | 0,273140927  | 0,1127098 | 2,4233993 | 0,015376  | 0,0493388 | NDUFS5        |
| ENSGALG00000006611 | 7163,1018 | 0,272646564  | 0,1103641 | 2,4704288 | 0,0134951 | 0,0445036 | KIF7          |
| ENSGALG00000011916 | 19570,61  | 0,271939056  | 0,112004  | 2,4279397 | 0,0151849 | 0,048829  | SREBF2        |
| ENSGALG00000008149 | 20254,48  | 0,269265878  | 0,1016307 | 2,6494538 | 0,0080622 | 0,0295947 | EWSR1         |
| ENSGALG00000004639 | 22048,421 | 0,266827236  | 0,1006911 | 2,6499598 | 0,0080501 | 0,0295664 | GNAI2         |
| ENSGALG00000008609 | 46235,247 | 0,259800517  | 0,1027436 | 2,5286292 | 0,0114509 | 0,0390835 | PTK7          |
| ENSGALG00000015617 | 50870,723 | 0,25500812   | 0,1021977 | 2,4952431 | 0,0125871 | 0,0422205 | RPS23         |
| ENSGALG00000017299 | 53500,096 | 0,254780179  | 0,1021944 | 2,4930939 | 0,0126635 | 0,0424143 | RPS11         |
| ENSGALG00000011951 | 179564,91 | 0,254345179  | 0,1001273 | 2,5402178 | 0,0110783 | 0,0381466 | RPSA          |
| ENSGALG00000008812 | 67809,432 | -0,244632027 | 0,100856  | -2,425557 | 0,0152849 | 0,0491044 | CCT4          |
| ENSGALG00000008038 | 49840,281 | -0,24989979  | 0,1024864 | -2,438371 | 0,0147536 | 0,0477354 | SF3B1         |
| ENSGALG00000010027 | 20404,953 | -0,251221533 | 0,1016636 | -2,471106 | 0,0134696 | 0,0444515 | CFL2          |
| ENSGALG00000009228 | 73654,992 | -0,251350219 | 0,0988688 | -2,54226  | 0,0110138 | 0,0380109 | PARP1         |
| ENSGALG00000001053 | 21507,706 | -0,251351424 | 0,101079  | -2,486682 | 0,0128941 | 0,0429539 | SRPRA         |
| ENSGALG00000009309 | 84581,571 | -0,253473054 | 0,1003203 | -2,526638 | 0,011516  | 0,0392467 | EIF5A2        |

|                    |           |              |           |           |           |           |               |
|--------------------|-----------|--------------|-----------|-----------|-----------|-----------|---------------|
| ENSGALG00000028484 | 18420,667 | -0,257706043 | 0,100811  | -2,556328 | 0,0105783 | 0,036816  |               |
| ENSGALG00000029167 | 20948,612 | -0,258969024 | 0,102918  | -2,516265 | 0,0118606 | 0,0402497 | THOP1         |
| ENSGALG00000010842 | 26982,926 | -0,259509696 | 0,1041078 | -2,492703 | 0,0126775 | 0,0424402 | UBR7          |
| ENSGALG00000008944 | 11174,776 | -0,259905745 | 0,1056639 | -2,459741 | 0,0139037 | 0,0455156 | FBXO11        |
| ENSGALG00000004040 | 10377,603 | -0,259935536 | 0,107237  | -2,423935 | 0,0153534 | 0,0492777 | MFAP3         |
| ENSGALG00000015706 | 7834,195  | -0,260107652 | 0,1070306 | -2,430217 | 0,0150898 | 0,0485921 | LETM1         |
| ENSGALG00000008962 | 22921,574 | -0,260994621 | 0,1007267 | -2,591116 | 0,0095665 | 0,0338747 | MSH2          |
| ENSGALG00000004965 | 10149,59  | -0,261538698 | 0,1058067 | -2,471854 | 0,0134414 | 0,044408  | SLC27A4       |
| ENSGALG00000002569 | 85602,751 | -0,262007268 | 0,1060299 | -2,47107  | 0,013471  | 0,0444515 | RAN           |
| ENSGALG00000015596 | 26927,118 | -0,262154887 | 0,1027805 | -2,550629 | 0,0107529 | 0,0372615 | MAP3K7        |
| ENSGALG00000015821 | 61741,915 | -0,262392566 | 0,1001176 | -2,620842 | 0,0087713 | 0,0316599 | CCT8          |
| ENSGALG00000002488 | 22309,721 | -0,262864461 | 0,100189  | -2,623685 | 0,0086984 | 0,0314552 | PAIP2         |
| ENSGALG00000008180 | 11420,002 | -0,263317561 | 0,1088104 | -2,419968 | 0,0155219 | 0,0497248 | SPG11         |
| ENSGALG00000008500 | 8629,7439 | -0,263668812 | 0,1056933 | -2,494659 | 0,0126078 | 0,0422692 | RBSN          |
| ENSGALG00000012405 | 16329,496 | -0,26384951  | 0,1069456 | -2,467137 | 0,0136198 | 0,0448342 | EZH2          |
| ENSGALG00000001350 | 6586,6747 | -0,264940499 | 0,1094289 | -2,421119 | 0,0154728 | 0,0496142 | RSPRY1        |
| ENSGALG00000001515 | 15194,726 | -0,265107192 | 0,1041998 | -2,54422  | 0,0109522 | 0,0378366 | ATAD3A        |
| ENSGALG00000016042 | 8800,9648 | -0,265273818 | 0,1060345 | -2,501769 | 0,0123574 | 0,0415732 | CHAF1B        |
| ENSGALG00000000581 | 14682,192 | -0,265993327 | 0,1094668 | -2,4299   | 0,015103  | 0,0486232 | DDX42         |
| ENSGALG00000014330 | 13035,527 | -0,266560386 | 0,1080798 | -2,466329 | 0,0136506 | 0,0448931 | NECAP1        |
| ENSGALG00000011504 | 43957,582 | -0,266735415 | 0,0983735 | -2,711456 | 0,0066988 | 0,0255261 | TMPO          |
| ENSGALG00000016226 | 14374,267 | -0,266804523 | 0,10248   | -2,603479 | 0,0092283 | 0,0329512 | CASK          |
| ENSGALG00000009781 | 15826,657 | -0,267258812 | 0,1074538 | -2,487198 | 0,0128754 | 0,0429337 | DOCK1         |
| ENSGALG00000009941 | 12598,143 | -0,268249202 | 0,1049288 | -2,556488 | 0,0105735 | 0,0368085 | SLC35B1       |
| ENSGALG00000017118 | 10000,178 | -0,268386575 | 0,1059335 | -2,533537 | 0,0112918 | 0,0387248 | MIPEP         |
| ENSGALG00000011553 | 8178,0483 | -0,268405007 | 0,1061309 | -2,528999 | 0,0114389 | 0,0390619 | UTP3          |
| ENSGALG00000016417 | 8419,6417 | -0,268534668 | 0,1066163 | -2,518702 | 0,0117788 | 0,0400122 | DSCC1         |
| ENSGALG00000016894 | 12688,39  | -0,268921468 | 0,1105656 | -2,432233 | 0,015006  | 0,0483911 | DNAJC3        |
| ENSGALG00000005587 | 297190,08 | -0,269468112 | 0,0978414 | -2,754133 | 0,0058848 | 0,0228853 | EIF4G2        |
| ENSGALG00000026111 | 15113,012 | -0,269770034 | 0,1052633 | -2,562812 | 0,0103828 | 0,0362374 | SAAL1         |
| ENSGALG00000006113 | 19999,679 | -0,272100604 | 0,1073343 | -2,535075 | 0,0112423 | 0,0385844 | ZNF326        |
| ENSGALG00000028900 | 8664,7981 | -0,272551766 | 0,1086758 | -2,507935 | 0,0121439 | 0,0409661 |               |
| ENSGALG00000010284 | 17075,328 | -0,272708241 | 0,1031857 | -2,642887 | 0,0082202 | 0,0300614 | GMPS          |
| ENSGALG00000016953 | 7971,8105 | -0,272857363 | 0,1064399 | -2,563488 | 0,0103626 | 0,0361948 | NAA16         |
| ENSGALG00000012402 | 11643,369 | -0,273460141 | 0,1041025 | -2,626836 | 0,0086183 | 0,0312235 | CUL1          |
| ENSGALG00000005870 | 10634,139 | -0,27364395  | 0,1062314 | -2,575923 | 0,0099973 | 0,0351622 | MCM10         |
| ENSGALG00000014331 | 49106,781 | -0,273875014 | 0,1046006 | -2,618292 | 0,0088371 | 0,0318637 | FKBP4         |
| ENSGALG00000005654 | 13436,846 | -0,27412231  | 0,1031825 | -2,656674 | 0,0078916 | 0,0291333 | PITPNB        |
| ENSGALG00000000907 | 34606,894 | -0,274397863 | 0,1051305 | -2,610069 | 0,0090524 | 0,0324512 | KARS          |
| ENSGALG00000006974 | 21987,582 | -0,275795791 | 0,1053463 | -2,617992 | 0,0088449 | 0,0318788 | DDX27         |
| ENSGALG00000014439 | 23731,455 | -0,275802443 | 0,1013775 | -2,72055  | 0,0065173 | 0,024948  | NCAPD2        |
| ENSGALG00000012244 | 14183,266 | -0,27619833  | 0,1043027 | -2,648045 | 0,0080959 | 0,0296783 | KLHDC2        |
| ENSGALG00000011130 | 11036,561 | -0,276443798 | 0,1084288 | -2,549541 | 0,0107865 | 0,0373494 | COPS4         |
| ENSGALG00000007491 | 11685,784 | -0,276864687 | 0,1090804 | -2,538171 | 0,0111433 | 0,0383219 | VWA9          |
| ENSGALG00000000856 | 7768,1765 | -0,277333067 | 0,1078018 | -2,57262  | 0,0100932 | 0,0354264 | EIF2D         |
| ENSGALG00000017128 | 6812,3227 | -0,278120188 | 0,1105176 | -2,516523 | 0,0118519 | 0,0402303 | SKA3          |
| ENSGALG00000002179 | 5553,9071 | -0,278228201 | 0,1141171 | -2,438094 | 0,0147649 | 0,0477607 | RP11-552F3.12 |
| ENSGALG00000008394 | 17588,746 | -0,278483321 | 0,1028235 | -2,708363 | 0,0067616 | 0,0257069 | THUMPD3       |
| ENSGALG00000007712 | 6385,5881 | -0,27852982  | 0,1114303 | -2,499589 | 0,0124338 | 0,0417989 | MYO1B         |
| ENSGALG00000003532 | 126353,26 | -0,278703141 | 0,1005665 | -2,771332 | 0,0055828 | 0,0219743 | DDX5          |
| ENSGALG00000009774 | 8409,19   | -0,279620047 | 0,1118848 | -2,499177 | 0,0124482 | 0,0418268 | ELF2          |
| ENSGALG00000014425 | 11773,73  | -0,280179605 | 0,1054976 | -2,655791 | 0,0079123 | 0,0291781 | NCAPG         |
| ENSGALG00000016340 | 46321,016 | -0,280763167 | 0,1135687 | -2,472187 | 0,0134289 | 0,0443774 | EIF2S3L       |
| ENSGALG00000012798 | 32319,553 | -0,280818753 | 0,1118437 | -2,510814 | 0,0120453 | 0,0407243 | SSR1          |
| ENSGALG00000016447 | 53614,037 | -0,281195284 | 0,1001808 | -2,806878 | 0,0050024 | 0,0200672 | PDIA6         |
| ENSGALG00000023682 | 6598,1149 | -0,28149273  | 0,1105533 | -2,546216 | 0,0108898 | 0,0376475 | GTF2H3        |
| ENSGALG00000026390 | 10622,058 | -0,281499002 | 0,1082118 | -2,60137  | 0,0092852 | 0,0330938 | BAHD1         |
| ENSGALG00000011762 | 7368,3608 | -0,281679323 | 0,1102252 | -2,55549  | 0,0106038 | 0,03687   | UBA6          |
| ENSGALG00000000726 | 16204,608 | -0,284722338 | 0,1131864 | -2,515517 | 0,0118858 | 0,0403051 | ELAVL1        |
| ENSGALG00000003248 | 40887,68  | -0,284935192 | 0,0989747 | -2,878868 | 0,003991  | 0,0166579 | SUB1          |
| ENSGALG00000011171 | 7789,5801 | -0,285220301 | 0,1097597 | -2,59859  | 0,0093608 | 0,0333194 | TBP           |
| ENSGALG00000015285 | 36051,228 | -0,286253589 | 0,1140443 | -2,510021 | 0,0120724 | 0,0407754 | TOMM70        |

|                    |           |              |           |           |           |           |              |
|--------------------|-----------|--------------|-----------|-----------|-----------|-----------|--------------|
| ENSGALG00000014773 | 11518,187 | -0,287175691 | 0,1109758 | -2,587732 | 0,009661  | 0,0342004 | ERBB2IP      |
| ENSGALG00000008086 | 20675,956 | -0,2873629   | 0,1034267 | -2,778421 | 0,0054624 | 0,021613  | ACTR1A       |
| ENSGALG00000026761 | 29796,866 | -0,287544813 | 0,1163484 | -2,471412 | 0,0134581 | 0,0444413 | LIN28B       |
| ENSGALG00000007101 | 5189,3303 | -0,287687091 | 0,1145161 | -2,512197 | 0,0119982 | 0,0406054 | ZPR1         |
| ENSGALG00000000823 | 24312,395 | -0,287692196 | 0,1169353 | -2,460268 | 0,0138833 | 0,0454597 | BAZ1B        |
| ENSGALG00000001219 | 4265,8107 | -0,287809408 | 0,1164176 | -2,472216 | 0,0134278 | 0,0443774 | PIGU         |
| ENSGALG00000010925 | 7979,9749 | -0,288036245 | 0,1081614 | -2,663022 | 0,0077442 | 0,0287218 | FAM126A      |
| ENSGALG00000005302 | 10087,37  | -0,288116362 | 0,105057  | -2,742476 | 0,0060978 | 0,0235755 | SASS6        |
| ENSGALG00000016238 | 8227,2702 | -0,288804451 | 0,1172255 | -2,463666 | 0,0137524 | 0,0451396 | MED14        |
| ENSGALG00000001277 | 6953,8461 | -0,28888441  | 0,1159131 | -2,492249 | 0,0126937 | 0,0424526 | STAG1        |
| ENSGALG00000003086 | 11675,474 | -0,289022537 | 0,1042361 | -2,772768 | 0,0055582 | 0,0219029 | EXOSC10      |
| ENSGALG00000010829 | 17151,788 | -0,289288545 | 0,1076078 | -2,68836  | 0,0071804 | 0,0270058 | CDCA7        |
| ENSGALG00000014570 | 6323,6704 | -0,289387372 | 0,1174534 | -2,463847 | 0,0137455 | 0,0451277 | LPCAT3       |
| ENSGALG00000010318 | 35384,519 | -0,289579204 | 0,1116994 | -2,592487 | 0,0095285 | 0,0337839 | TMED10       |
| ENSGALG00000015804 | 7311,6424 | -0,289600409 | 0,1113075 | -2,601805 | 0,0092734 | 0,0330778 | LTN1         |
| ENSGALG00000003355 | 8990,1272 | -0,289601526 | 0,1161151 | -2,49409  | 0,0126281 | 0,0423163 | NOP16        |
| ENSGALG00000008095 | 17234,199 | -0,289644341 | 0,113924  | -2,542434 | 0,0110083 | 0,0380016 | KIF23        |
| ENSGALG00000005769 | 9850,6081 | -0,289680709 | 0,1121661 | -2,582606 | 0,0098057 | 0,0346586 | WEE1         |
| ENSGALG00000010167 | 23334,849 | -0,289818191 | 0,1045631 | -2,771707 | 0,0055763 | 0,0219585 | PNN          |
| ENSGALG00000003194 | 7179,1586 | -0,290381921 | 0,1074323 | -2,702929 | 0,0068731 | 0,0260208 | ATP6V0A2     |
| ENSGALG00000011304 | 6781,2258 | -0,290613007 | 0,1160055 | -2,505165 | 0,0122394 | 0,0412267 | NGLY1        |
| ENSGALG00000005858 | 11910,812 | -0,290886069 | 0,1040132 | -2,796626 | 0,0051639 | 0,0205937 | DR1          |
| ENSGALG00000006706 | 5131,464  | -0,290887314 | 0,1158194 | -2,511558 | 0,0120199 | 0,0406486 | USP6NL       |
| ENSGALG00000013369 | 5721,3826 | -0,290969648 | 0,1118474 | -2,601488 | 0,009282  | 0,0330933 | NCLN         |
| ENSGALG00000001443 | 24266,064 | -0,291025391 | 0,1058054 | -2,750573 | 0,0059491 | 0,0231222 | PTPRU        |
| ENSGALG00000014854 | 16295,817 | -0,291513975 | 0,1167727 | -2,496423 | 0,0125453 | 0,0421114 | MYL12A       |
| ENSGALG00000006934 | 7206,0363 | -0,291528022 | 0,1149418 | -2,536309 | 0,0112028 | 0,0384778 | PATZ1        |
| ENSGALG00000007254 | 3754,7945 | -0,291530428 | 0,1205128 | -2,419082 | 0,0155597 | 0,0498226 | ARHGAP12     |
| ENSGALG00000006884 | 8596,5657 | -0,291624168 | 0,113545  | -2,568359 | 0,0102181 | 0,0357819 | mars-05      |
| ENSGALG00000015120 | 9551,3619 | -0,291739099 | 0,116855  | -2,49659  | 0,0125394 | 0,042102  | QTRT2        |
| ENSGALG00000001438 | 13509,485 | -0,292098905 | 0,1078016 | -2,709598 | 0,0067365 | 0,0256277 | WDR77        |
| ENSGALG00000015483 | 16683,55  | -0,292201948 | 0,1099352 | -2,657946 | 0,0078618 | 0,029063  | PNISR        |
| ENSGALG00000002341 | 9767,8137 | -0,292212762 | 0,1068419 | -2,735002 | 0,006238  | 0,0240255 | AP3S1        |
| ENSGALG00000001733 | 10762,095 | -0,292618206 | 0,1060051 | -2,760415 | 0,0057728 | 0,0225205 | LRIG2        |
| ENSGALG00000015933 | 13856,149 | -0,292842928 | 0,1142604 | -2,562944 | 0,0103789 | 0,036237  | PAXBP1       |
| ENSGALG00000007516 | 13969,274 | -0,293041961 | 0,1052871 | -2,783265 | 0,0053815 | 0,0213301 | RP11-449H3.3 |
| ENSGALG00000002136 | 3591,7129 | -0,293341559 | 0,1202128 | -2,440185 | 0,0146797 | 0,0475641 | AP3B2        |
| ENSGALG00000016106 | 14612,023 | -0,293596343 | 0,1087124 | -2,700671 | 0,00692   | 0,0261637 | NUDCD1       |
| ENSGALG00000013424 | 3938,6768 | -0,293681861 | 0,1183319 | -2,481848 | 0,0130703 | 0,0434666 | TULP3        |
| ENSGALG00000008529 | 7562,5902 | -0,293829308 | 0,1095259 | -2,682737 | 0,0073022 | 0,0273583 | FASTKD2      |
| ENSGALG00000001175 | 5051,078  | -0,294210197 | 0,1151299 | -2,555462 | 0,0106047 | 0,03687   | C4BPA        |
| ENSGALG00000000890 | 14838,887 | -0,29430607  | 0,1074987 | -2,737765 | 0,0061858 | 0,0238651 | SRPK1        |
| ENSGALG00000001503 | 12542,871 | -0,294569539 | 0,1129054 | -2,608993 | 0,0090809 | 0,0325017 | TBCD         |
| ENSGALG00000005927 | 7896,7145 | -0,295114532 | 0,1102438 | -2,676927 | 0,0074301 | 0,0277608 | ST5          |
| ENSGALG00000016006 | 15900,752 | -0,295193317 | 0,10687   | -2,762171 | 0,0057418 | 0,0224255 | ITSN1        |
| ENSGALG00000011392 | 3156,1633 | -0,295432379 | 0,1200153 | -2,461624 | 0,013831  | 0,045321  | MSH4         |
| ENSGALG00000001301 | 23007,802 | -0,295608227 | 0,1064113 | -2,777977 | 0,0054699 | 0,0216363 | CLTCL1       |
| ENSGALG00000003262 | 4105,2449 | -0,296160558 | 0,1196838 | -2,474525 | 0,0133413 | 0,0441513 | VAMP4        |
| ENSGALG00000002134 | 7387,1514 | -0,296314687 | 0,1196419 | -2,47668  | 0,0132611 | 0,0439509 | THUMPD1      |
| ENSGALG00000016270 | 5777,0167 | -0,296663159 | 0,109934  | -2,698557 | 0,0069641 | 0,0262954 | EFR3A        |
| ENSGALG00000002670 | 23872,138 | -0,297199956 | 0,1006311 | -2,953362 | 0,0031433 | 0,0136686 | ZC3H15       |
| ENSGALG00000008094 | 100007,59 | -0,297620991 | 0,1010893 | -2,94414  | 0,0032385 | 0,0140066 | HSPD1        |
| ENSGALG00000010787 | 8044,4352 | -0,297642358 | 0,1129413 | -2,635371 | 0,0084045 | 0,030612  | TTC4         |
| ENSGALG00000016203 | 5413,6009 | -0,297788719 | 0,1132631 | -2,629177 | 0,0085592 | 0,0310507 | KHDRBS3      |
| ENSGALG00000017134 | 4848,4656 | -0,298805127 | 0,1142181 | -2,616093 | 0,0088942 | 0,0320019 | IFT88        |
| ENSGALG00000023703 | 6517,2936 | -0,298876557 | 0,1228202 | -2,433448 | 0,0149558 | 0,0482633 | GIT1         |
| ENSGALG00000006646 | 12074,844 | -0,299111546 | 0,108755  | -2,750324 | 0,0059536 | 0,0231332 | ABCC1        |
| ENSGALG00000008325 | 37371,278 | -0,299659865 | 0,1093847 | -2,739505 | 0,0061532 | 0,0237661 | CKAP5        |
| ENSGALG00000011445 | 6835,5845 | -0,299863462 | 0,1227479 | -2,442921 | 0,0145689 | 0,0472501 | AAMP         |
| ENSGALG00000013382 | 5584,8468 | -0,299878268 | 0,1168395 | -2,566582 | 0,0102706 | 0,0359195 | SCO1         |
| ENSGALG00000012561 | 14201,494 | -0,299998657 | 0,1061635 | -2,825817 | 0,004716  | 0,0190927 | PKP4         |
| ENSGALG00000010120 | 15856,807 | -0,300036521 | 0,1036618 | -2,894379 | 0,0037991 | 0,0160188 | KIF2C        |

|                    |           |              |           |           |           |           |             |
|--------------------|-----------|--------------|-----------|-----------|-----------|-----------|-------------|
| ENSGALG00000010818 | 4623,916  | -0,300127816 | 0,1207061 | -2,486435 | 0,012903  | 0,0429732 | PLPP3       |
| ENSGALG00000010619 | 3449,0695 | -0,300249899 | 0,1235308 | -2,430566 | 0,0150752 | 0,0485568 | CC2D1B      |
| ENSGALG00000001964 | 6474,3266 | -0,300692826 | 0,114042  | -2,636685 | 0,0083721 | 0,0305182 | INPP5E      |
| ENSGALG00000014370 | 5230,6919 | -0,300941728 | 0,1119644 | -2,687833 | 0,0071917 | 0,027041  | SEL1L3      |
| ENSGALG00000010275 | 8613,432  | -0,301228493 | 0,1133946 | -2,656462 | 0,0078965 | 0,0291438 | FCF1        |
| ENSGALG00000015611 | 5412,5223 | -0,301903565 | 0,1149449 | -2,626507 | 0,0086266 | 0,0312454 | CASP8AP2    |
| ENSGALG00000007351 | 8585,3707 | -0,301983    | 0,1078117 | -2,801023 | 0,0050941 | 0,0203689 | MTPAP       |
| ENSGALG00000014248 | 12329,033 | -0,30224682  | 0,1037621 | -2,912883 | 0,0035811 | 0,0152603 | TMEM33      |
| ENSGALG00000011301 | 5632,1725 | -0,302449789 | 0,1176772 | -2,570164 | 0,010165  | 0,0356142 | LRRC40      |
| ENSGALG00000005786 | 13742,557 | -0,302474038 | 0,1235613 | -2,447967 | 0,0143665 | 0,046727  | DNTTIP2     |
| ENSGALG00000016872 | 5074,8717 | -0,30261365  | 0,1222955 | -2,474446 | 0,0133443 | 0,0441513 | PCCA        |
| ENSGALG00000009990 | 5003,3757 | -0,302651446 | 0,112748  | -2,684317 | 0,0072678 | 0,0272594 | SRBD1       |
| ENSGALG00000005054 | 41673,988 | -0,303560897 | 0,1093589 | -2,775822 | 0,0055062 | 0,0217675 | DKC1        |
| ENSGALG00000005525 | 43269,502 | -0,303682785 | 0,1060484 | -2,863624 | 0,0041882 | 0,0173217 | SRSF1       |
| ENSGALG00000013573 | 4217,1955 | -0,303884724 | 0,1221979 | -2,486825 | 0,0128889 | 0,0429494 | ALG2        |
| ENSGALG00000020454 | 8238,8869 | -0,304067404 | 0,1241364 | -2,449462 | 0,014307  | 0,0465892 | C5H14ORF169 |
| ENSGALG00000001726 | 4862,9398 | -0,304268782 | 0,1143657 | -2,660491 | 0,0078027 | 0,0288914 | NUDCD2      |
| ENSGALG00000007102 | 6521,5758 | -0,304336302 | 0,1232551 | -2,469158 | 0,0135432 | 0,0446249 | MLEC        |
| ENSGALG00000000627 | 7600,7154 | -0,305117543 | 0,1084461 | -2,81354  | 0,0048999 | 0,019755  | DNAJC11     |
| ENSGALG00000026838 | 4227,5246 | -0,305207931 | 0,1214042 | -2,513982 | 0,0119377 | 0,0404206 | MDFIC       |
| ENSGALG00000003052 | 7714,0905 | -0,30523634  | 0,1156088 | -2,640252 | 0,0082844 | 0,0302474 | AGFG1       |
| ENSGALG00000006418 | 20583,346 | -0,305254291 | 0,1100474 | -2,773843 | 0,0055398 | 0,0218623 | PDPK1       |
| ENSGALG00000015013 | 17595,102 | -0,305329384 | 0,1094445 | -2,789809 | 0,0052739 | 0,0209647 | MSX1        |
| ENSGALG00000006488 | 10099,124 | -0,305368261 | 0,1111059 | -2,749605 | 0,0059667 | 0,0231774 | RYK         |
| ENSGALG00000009856 | 9272,2302 | -0,305500873 | 0,1237141 | -2,46941  | 0,0135336 | 0,044615  | GNS         |
| ENSGALG00000001007 | 27355,205 | -0,305959563 | 0,1072059 | -2,853942 | 0,004318  | 0,017756  | MMP15       |
| ENSGALG00000015465 | 4968,7172 | -0,305990751 | 0,1148791 | -2,66359  | 0,0077312 | 0,0286811 | ASCC3       |
| ENSGALG00000001267 | 9421,3215 | -0,306647481 | 0,1081863 | -2,83444  | 0,0045906 | 0,0186403 | MAP2K2      |
| ENSGALG00000013064 | 12429,63  | -0,306789618 | 0,1032068 | -2,972572 | 0,0029532 | 0,0130039 | NSUN2       |
| ENSGALG00000010042 | 7954,106  | -0,30721043  | 0,1081752 | -2,839935 | 0,0045123 | 0,0183881 | CNOT2       |
| ENSGALG00000007307 | 30782,066 | -0,307584455 | 0,1030681 | -2,984284 | 0,0028424 | 0,0125999 | USP7        |
| ENSGALG00000015331 | 7117,5258 | -0,308171718 | 0,1237599 | -2,490077 | 0,0127715 | 0,0426815 | GNE         |
| ENSGALG00000012109 | 33178,661 | -0,308358257 | 0,1122444 | -2,747204 | 0,0060106 | 0,023288  | EIF3M       |
| ENSGALG00000017073 | 7452,5062 | -0,308364987 | 0,1160232 | -2,657786 | 0,0078656 | 0,0290689 | BRCA2       |
| ENSGALG00000006445 | 15242,685 | -0,308553523 | 0,1035516 | -2,979708 | 0,0028852 | 0,012754  | ARNT2       |
| ENSGALG00000003373 | 12183,365 | -0,309311012 | 0,1178882 | -2,623766 | 0,0086964 | 0,0314552 | BRIX1       |
| ENSGALG00000000990 | 39372,44  | -0,309348416 | 0,12727   | -2,430646 | 0,0150719 | 0,0485568 | SRSF6       |
| ENSGALG00000012936 | 8859,5776 | -0,309500805 | 0,1175868 | -2,632105 | 0,0084858 | 0,0308336 | KIAA1551    |
| ENSGALG00000020164 | 4566,1787 | -0,31008137  | 0,1239655 | -2,501353 | 0,012372  | 0,0416118 | GAR1        |
| ENSGALG00000001504 | 8296,3292 | -0,31053349  | 0,1111444 | -2,793964 | 0,0052066 | 0,0207336 | DDX20       |
| ENSGALG00000010961 | 89733,227 | -0,310634298 | 0,100957  | -3,076896 | 0,0020917 | 0,0098032 | IGF2BP3     |
| ENSGALG00000008211 | 5098,0335 | -0,311240889 | 0,1149304 | -2,708081 | 0,0067673 | 0,0257069 | ACP2        |
| ENSGALG00000003815 | 34063,921 | -0,31144656  | 0,1009753 | -3,084385 | 0,0020397 | 0,0095994 | RPN2        |
| ENSGALG00000007905 | 37631,106 | -0,311643664 | 0,1126417 | -2,766681 | 0,005663  | 0,0222004 | LAMB1       |
| ENSGALG00000016267 | 13457,673 | -0,312264026 | 0,115716  | -2,698538 | 0,0069645 | 0,0262954 | PHF3        |
| ENSGALG00000010344 | 30762,544 | -0,312514856 | 0,1018116 | -3,069541 | 0,0021439 | 0,0100027 | DHX36       |
| ENSGALG00000001848 | 13173,32  | -0,312572754 | 0,1053696 | -2,96644  | 0,0030127 | 0,0132102 | UBE2J2      |
| ENSGALG00000002106 | 4264,2615 | -0,312942638 | 0,1236027 | -2,531844 | 0,0113465 | 0,0388341 | CLCC1       |
| ENSGALG00000013462 | 2483,9812 | -0,3130983   | 0,1273973 | -2,457652 | 0,0139849 | 0,0457372 | STX17       |
| ENSGALG00000008714 | 4292,5321 | -0,313343892 | 0,1254822 | -2,497119 | 0,0125207 | 0,04206   | ABI2        |
| ENSGALG00000011797 | 18609,134 | -0,313395866 | 0,1178867 | -2,65845  | 0,0078501 | 0,0290274 | MTHFD1      |
| ENSGALG00000007089 | 17474,95  | -0,313684689 | 0,1041053 | -3,013149 | 0,0025855 | 0,0116254 | KDEL2       |
| ENSGALG00000005647 | 9129,0785 | -0,313707238 | 0,1081392 | -2,900958 | 0,0037202 | 0,0157595 | ABCD3       |
| ENSGALG00000016736 | 23809,889 | -0,314343681 | 0,1027519 | -3,05925  | 0,0022189 | 0,0102792 | CYFIP1      |
| ENSGALG00000001973 | 14919,644 | -0,314418391 | 0,103095  | -3,049793 | 0,00229   | 0,0105372 | GNL2        |
| ENSGALG00000007410 | 10084,856 | -0,314498411 | 0,1237962 | -2,540453 | 0,0110709 | 0,0381306 | IGDCC4      |
| ENSGALG00000012827 | 3045,2609 | -0,314591513 | 0,12464   | -2,524001 | 0,0116028 | 0,0394908 | RIPK1       |
| ENSGALG00000016072 | 4693,3951 | -0,314891598 | 0,1172976 | -2,684553 | 0,0072627 | 0,0272551 | SLC25A32    |
| ENSGALG00000003419 | 3186,2022 | -0,314999563 | 0,1269361 | -2,481561 | 0,0130808 | 0,0434804 | MPHOSPH9    |
| ENSGALG00000016893 | 6244,0698 | -0,315224782 | 0,1174264 | -2,684447 | 0,007265  | 0,0272563 | UGGT2       |
| ENSGALG00000006356 | 8494,9234 | -0,315726233 | 0,1090464 | -2,895338 | 0,0037875 | 0,0159897 | MKLN1       |
| ENSGALG00000013174 | 3418,9295 | -0,315789129 | 0,1225684 | -2,576431 | 0,0099826 | 0,0351244 | RECQL       |



|                    |           |              |           |           |           |           |          |
|--------------------|-----------|--------------|-----------|-----------|-----------|-----------|----------|
| ENSGALG00000003948 | 5405,0125 | -0,315917308 | 0,1189483 | -2,65592  | 0,0079092 | 0,0291748 | ALAS1    |
| ENSGALG00000010115 | 2409,6668 | -0,316246717 | 0,1295797 | -2,440558 | 0,0146646 | 0,0475264 | SCLT1    |
| ENSGALG00000009305 | 39225,132 | -0,31625936  | 0,1073859 | -2,945072 | 0,0032288 | 0,0139777 | LBR      |
| ENSGALG00000014378 | 6758,1006 | -0,3165666   | 0,1112178 | -2,846367 | 0,0044221 | 0,018102  | ANAPC4   |
| ENSGALG00000025996 | 45890,797 | -0,316767046 | 0,1146038 | -2,76402  | 0,0057094 | 0,0223244 | MKI67    |
| ENSGALG00000009438 | 13859,101 | -0,316803968 | 0,1103871 | -2,869936 | 0,0041056 | 0,0170626 | SLC39A9  |
| ENSGALG00000002158 | 4001,6826 | -0,31684048  | 0,1201134 | -2,637844 | 0,0083435 | 0,0304223 | GOLGA3   |
| ENSGALG00000004375 | 15903,904 | -0,317187722 | 0,1029166 | -3,081989 | 0,0020562 | 0,0096636 | VPS35    |
| ENSGALG00000005518 | 5338,317  | -0,317368673 | 0,1224356 | -2,592127 | 0,0095385 | 0,0338105 | ADRBK2   |
| ENSGALG00000005567 | 4701,7613 | -0,317423466 | 0,1173805 | -2,704227 | 0,0068464 | 0,0259502 |          |
| ENSGALG00000016056 | 26843,51  | -0,317775278 | 0,1063633 | -2,98764  | 0,0028114 | 0,0124926 | AZIN1    |
| ENSGALG00000003753 | 2677,8795 | -0,317987251 | 0,1281857 | -2,480677 | 0,0131133 | 0,0435671 | CYLD     |
| ENSGALG00000028935 | 5415,5214 | -0,318166766 | 0,1109111 | -2,868666 | 0,0041221 | 0,0171086 | BCL10    |
| ENSGALG00000016243 | 13413,478 | -0,318335491 | 0,1120682 | -2,840551 | 0,0045036 | 0,0183581 | PHF20L1  |
| ENSGALG00000006525 | 5626,0083 | -0,318337533 | 0,1236191 | -2,575147 | 0,0100197 | 0,035223  | NCAPG2   |
| ENSGALG00000008045 | 3399,549  | -0,318998276 | 0,1242709 | -2,566959 | 0,0102595 | 0,0359082 | SLC9A8   |
| ENSGALG00000010748 | 12682,351 | -0,319116199 | 0,1031995 | -3,092226 | 0,0019866 | 0,0093851 | EXO1     |
| ENSGALG00000006861 | 3243,9283 | -0,319421528 | 0,1239662 | -2,576682 | 0,0099754 | 0,0351124 | COQ7     |
| ENSGALG00000006400 | 5333,2312 | -0,319435266 | 0,1204467 | -2,652088 | 0,0079996 | 0,0294363 | LMBR1    |
| ENSGALG00000004283 | 4377,1001 | -0,319446156 | 0,1200243 | -2,661512 | 0,007779  | 0,0288274 | GCOM1    |
| ENSGALG00000009854 | 6064,675  | -0,319466559 | 0,1106787 | -2,886432 | 0,0038964 | 0,016358  | NEK2     |
| ENSGALG00000003294 | 7834,3924 | -0,31979622  | 0,1079493 | -2,962467 | 0,0030518 | 0,0133647 | ATAD5    |
| ENSGALG00000010312 | 8288,8613 | -0,319830197 | 0,1182081 | -2,705655 | 0,006817  | 0,0258605 | PLCH1    |
| ENSGALG00000000847 | 5954,7792 | -0,320140743 | 0,1166802 | -2,743746 | 0,0060743 | 0,0234946 | GARNL3   |
| ENSGALG00000015983 | 15093,436 | -0,320176555 | 0,1272555 | -2,516013 | 0,0118691 | 0,0402685 | GART     |
| ENSGALG00000012160 | 7671,7979 | -0,320265774 | 0,1148045 | -2,789663 | 0,0052763 | 0,0209681 | KIF18A   |
| ENSGALG00000005139 | 53456,399 | -0,320485908 | 0,1129243 | -2,838059 | 0,0045389 | 0,0184744 | CLTC     |
| ENSGALG00000011568 | 15058,649 | -0,320702144 | 0,1071903 | -2,991896 | 0,0027725 | 0,0123601 | GRSF1    |
| ENSGALG00000010677 | 4086,7271 | -0,320970598 | 0,1263152 | -2,54103  | 0,0110526 | 0,0380966 | NRDE2    |
| ENSGALG00000005367 | 6338,6685 | -0,320977764 | 0,116103  | -2,764594 | 0,0056994 | 0,022298  | MRPS22   |
| ENSGALG00000004197 | 7479,7717 | -0,321070935 | 0,1089802 | -2,94614  | 0,0032177 | 0,0139429 | SUPV3L1  |
| ENSGALG00000005668 | 17427,249 | -0,321274618 | 0,102142  | -3,145373 | 0,0016588 | 0,0080714 | WSB1     |
| ENSGALG00000001817 | 20809,427 | -0,321828859 | 0,1040048 | -3,094366 | 0,0019723 | 0,0093338 | CTCF     |
| ENSGALG00000000235 | 25074,326 | -0,321994098 | 0,1026312 | -3,13739  | 0,0017046 | 0,008262  | PPP2R2A  |
| ENSGALG00000016496 | 7694,8086 | -0,322028168 | 0,1163281 | -2,768276 | 0,0056354 | 0,0221302 | ATAD2B   |
| ENSGALG00000007021 | 10708,327 | -0,322236639 | 0,122335  | -2,634052 | 0,0084373 | 0,0307066 | PCNT     |
| ENSGALG00000010178 | 15181,256 | -0,322485727 | 0,103283  | -3,122351 | 0,0017941 | 0,0086102 | PUM3     |
| ENSGALG00000012415 | 30254,104 | -0,322526711 | 0,1060731 | -3,040608 | 0,002361  | 0,010816  | PDIA4    |
| ENSGALG00000010629 | 6077,087  | -0,322714728 | 0,1236984 | -2,608883 | 0,0090838 | 0,0325036 | ZCCHC11  |
| ENSGALG00000015420 | 5618,1384 | -0,322913162 | 0,1200773 | -2,689211 | 0,0071621 | 0,0269519 | MINA     |
| ENSGALG00000016312 | 24555,619 | -0,323062498 | 0,1115176 | -2,896963 | 0,0037679 | 0,0159318 | POLA1    |
| ENSGALG00000027524 | 18598,963 | -0,323112776 | 0,1191737 | -2,711276 | 0,0067025 | 0,0255328 | TNKS1BP1 |
| ENSGALG00000004905 | 15958,906 | -0,323232118 | 0,1254595 | -2,576385 | 0,0099839 | 0,0351244 | MYEF2    |
| ENSGALG00000026825 | 4552,9877 | -0,323431285 | 0,117936  | -2,742431 | 0,0060986 | 0,0235755 | CENPL    |
| ENSGALG00000005758 | 19288,831 | -0,323694502 | 0,1027713 | -3,149659 | 0,0016346 | 0,007994  | SPPL2A   |
| ENSGALG00000012795 | 9238,0512 | -0,32399695  | 0,115695  | -2,80044  | 0,0051033 | 0,0203938 | RIOK1    |
| ENSGALG00000006477 | 10679,273 | -0,324083678 | 0,1040257 | -3,11542  | 0,0018368 | 0,0087718 | DNAJB6   |
| ENSGALG00000001225 | 6585,9552 | -0,324115689 | 0,1122468 | -2,887527 | 0,0038828 | 0,0163183 | RABGAP1  |
| ENSGALG00000002248 | 6999,8386 | -0,324167266 | 0,1095291 | -2,959644 | 0,0030799 | 0,0134575 | NAB1     |
| ENSGALG00000004468 | 4954,5803 | -0,324300015 | 0,1240229 | -2,61484  | 0,0089269 | 0,0320941 | RMDN3    |
| ENSGALG00000001774 | 27937,325 | -0,324482091 | 0,1102622 | -2,942822 | 0,0032524 | 0,0140619 | NEO1     |
| ENSGALG00000014740 | 9788,9965 | -0,324585149 | 0,1200564 | -2,703606 | 0,0068592 | 0,0259771 | IPO11    |
| ENSGALG00000002222 | 13238,295 | -0,324594377 | 0,102741  | -3,159348 | 0,0015812 | 0,0077775 | NOC2L    |
| ENSGALG00000001691 | 7796,647  | -0,324650287 | 0,1188991 | -2,73047  | 0,0063244 | 0,0243034 | CPSF3L   |
| ENSGALG00000016630 | 14201,696 | -0,324650816 | 0,1156607 | -2,806924 | 0,0050017 | 0,0200672 | EXTL3    |
| ENSGALG00000008963 | 9612,6755 | -0,324767208 | 0,1203182 | -2,699236 | 0,0069499 | 0,0262549 | DBF4     |
| ENSGALG00000016383 | 4080,3919 | -0,324853698 | 0,1238239 | -2,623513 | 0,0087028 | 0,0314627 | TBC1D31  |
| ENSGALG00000000814 | 43324,255 | -0,325022823 | 0,0992306 | -3,275429 | 0,001055  | 0,0055891 | HNRNPR   |
| ENSGALG00000014575 | 10529,411 | -0,325103377 | 0,1055361 | -3,080496 | 0,0020666 | 0,0096988 | SEPHS1   |
| ENSGALG00000010228 | 4674,7787 | -0,325552019 | 0,1143948 | -2,845863 | 0,0044291 | 0,0181143 | TOE1     |
| ENSGALG00000017098 | 6011,3801 | -0,325598928 | 0,1104524 | -2,947867 | 0,0031997 | 0,0138873 | GTF3A    |
| ENSGALG00000013626 | 6229,0015 | -0,325639127 | 0,1131349 | -2,878325 | 0,0039979 | 0,0166777 | GMNN     |

|                    |           |              |           |           |           |           |         |
|--------------------|-----------|--------------|-----------|-----------|-----------|-----------|---------|
| ENSGALG00000011251 | 4075,2982 | -0,326088701 | 0,1204829 | -2,706514 | 0,0067994 | 0,025808  | TBC1D5  |
| ENSGALG00000004780 | 17002,116 | -0,326184617 | 0,1040438 | -3,135071 | 0,0017181 | 0,0083217 | NAA25   |
| ENSGALG00000006512 | 270063,95 | -0,326293391 | 0,1225651 | -2,662205 | 0,0077631 | 0,028776  | HSPA8   |
| ENSGALG00000017200 | 4010,3886 | -0,326558761 | 0,134864  | -2,421394 | 0,0154611 | 0,0495885 | MTMR2   |
| ENSGALG00000003303 | 8501,0081 | -0,326575058 | 0,1195862 | -2,730875 | 0,0063166 | 0,024288  | IDH3A   |
| ENSGALG00000012986 | 12589,688 | -0,326734663 | 0,1169574 | -2,793621 | 0,0052122 | 0,0207496 | KDM5A   |
| ENSGALG00000011091 | 12877,91  | -0,326829517 | 0,1036675 | -3,152671 | 0,0016178 | 0,0079204 | NUP133  |
| ENSGALG00000010185 | 21490,623 | -0,326946921 | 0,1096738 | -2,981085 | 0,0028723 | 0,0127051 | HSPA4L  |
| ENSGALG00000004263 | 8041,9782 | -0,32716572  | 0,1124664 | -2,909008 | 0,0036258 | 0,0154169 | MYDGF   |
| ENSGALG00000001386 | 15479,004 | -0,32719689  | 0,1250442 | -2,61665  | 0,0088797 | 0,0319666 | PI4KA   |
| ENSGALG00000015118 | 7147,4862 | -0,327224219 | 0,1258447 | -2,600222 | 0,0093163 | 0,0331874 | SMC5    |
| ENSGALG00000004691 | 6193,4106 | -0,327404992 | 0,1145398 | -2,85844  | 0,0042573 | 0,0175646 | NLE1    |
| ENSGALG00000001262 | 15946,322 | -0,32743844  | 0,1065971 | -3,07174  | 0,0021282 | 0,0099471 | CLIC4   |
| ENSGALG00000003624 | 5974,0185 | -0,32749199  | 0,132372  | -2,474028 | 0,0133599 | 0,0441923 | KLHL10  |
| ENSGALG00000021128 | 30791,423 | -0,32759269  | 0,1148555 | -2,852217 | 0,0043415 | 0,0178311 | FSCN1   |
| ENSGALG00000004161 | 24484,078 | -0,327725215 | 0,1031907 | -3,175919 | 0,0014936 | 0,0074083 | CCNB2   |
| ENSGALG00000012192 | 7395,3976 | -0,328017116 | 0,1315753 | -2,492999 | 0,0126669 | 0,0424152 | NT5C3A  |
| ENSGALG00000015367 | 2777,8919 | -0,328321788 | 0,124308  | -2,641195 | 0,0082614 | 0,0301957 | PVRL3   |
| ENSGALG00000009944 | 17813,767 | -0,328405469 | 0,1120225 | -2,931602 | 0,0033722 | 0,0144834 | MYST2   |
| ENSGALG00000006829 | 14523,345 | -0,328581471 | 0,1344576 | -2,443756 | 0,0145352 | 0,0471746 | SMG1    |
| ENSGALG00000014286 | 15937,559 | -0,329230926 | 0,1063546 | -3,095595 | 0,0019642 | 0,0093017 | PDS5A   |
| ENSGALG00000015334 | 2718,7701 | -0,329290061 | 0,1296871 | -2,539112 | 0,0111134 | 0,0382415 | ZBTB11  |
| ENSGALG00000027091 | 4014,8809 | -0,329390279 | 0,1266481 | -2,60083  | 0,0092998 | 0,0331373 | GPR27   |
| ENSGALG00000013962 | 7389,8352 | -0,329646116 | 0,1086383 | -3,034345 | 0,0024106 | 0,0109913 | HBS1L   |
| ENSGALG00000007603 | 19301,424 | -0,329941075 | 0,1204714 | -2,738749 | 0,0061673 | 0,0238124 | RRP12   |
| ENSGALG00000002062 | 16195,779 | -0,329944458 | 0,105102  | -3,139279 | 0,0016936 | 0,0082195 | SRP68   |
| ENSGALG00000001962 | 54240,973 | -0,330389801 | 0,103799  | -3,182976 | 0,0014577 | 0,0072725 | PTBP1   |
| ENSGALG00000001283 | 38879,748 | -0,330483919 | 0,1158085 | -2,853711 | 0,0043212 | 0,0177582 | SRRM1   |
| ENSGALG00000010576 | 13964,899 | -0,330632554 | 0,1026092 | -3,22225  | 0,0012719 | 0,0065198 | GTF2A1  |
| ENSGALG00000010481 | 12612,575 | -0,330642085 | 0,1059113 | -3,121879 | 0,001797  | 0,008621  | CMPK1   |
| ENSGALG00000028637 | 4067,4699 | -0,330733659 | 0,135202  | -2,446219 | 0,0144363 | 0,0468982 | PTPN23  |
| ENSGALG00000010341 | 71633,337 | -0,33081711  | 0,1033707 | -3,2003   | 0,0013728 | 0,0069433 | XPO5    |
| ENSGALG00000015540 | 16673,279 | -0,330835071 | 0,1205533 | -2,744306 | 0,0060639 | 0,0234679 | RAD23B  |
| ENSGALG00000007387 | 14223,805 | -0,330955786 | 0,1065147 | -3,107138 | 0,0018891 | 0,0089867 | GTF3C1  |
| ENSGALG00000021683 | 8310,9409 | -0,330974467 | 0,1292911 | -2,559917 | 0,0104697 | 0,0364939 | RER1    |
| ENSGALG00000003547 | 13605,07  | -0,331189406 | 0,1062178 | -3,118021 | 0,0018207 | 0,0087131 | SKP2    |
| ENSGALG00000002889 | 12683,471 | -0,331591263 | 0,1090874 | -3,039685 | 0,0023683 | 0,010842  | ASPSCR1 |
| ENSGALG00000001788 | 3234,7706 | -0,331738591 | 0,1195268 | -2,775432 | 0,0055128 | 0,0217718 | ADPGK   |
| ENSGALG00000014445 | 19258,2   | -0,331954776 | 0,1074559 | -3,08922  | 0,0020068 | 0,0094707 | NOP2    |
| ENSGALG00000011904 | 3328,8747 | -0,332013213 | 0,1288249 | -2,577244 | 0,0099592 | 0,0350644 | TRMT5   |
| ENSGALG00000007590 | 10666,564 | -0,332146464 | 0,1081338 | -3,071625 | 0,002129  | 0,0099471 | MTMR8   |
| ENSGALG00000004806 | 7000,4013 | -0,332607085 | 0,1094342 | -3,039334 | 0,002371  | 0,0108489 | EDEM3   |
| ENSGALG00000004108 | 32339,09  | -0,332634184 | 0,1003676 | -3,314158 | 0,0009192 | 0,004992  | CCAR1   |
| ENSGALG00000015813 | 10809,928 | -0,332684119 | 0,1173697 | -2,834497 | 0,0045898 | 0,0186403 | USP16   |
| ENSGALG00000010967 | 21405,06  | -0,332907911 | 0,1160936 | -2,867581 | 0,0041362 | 0,017143  | DOCK7   |
| ENSGALG00000007528 | 28367,48  | -0,33311917  | 0,1060953 | -3,139811 | 0,0016906 | 0,0082087 | TCERG1  |
| ENSGALG00000016766 | 4441,5098 | -0,333177403 | 0,118864  | -2,803014 | 0,0050627 | 0,0202733 | REV1    |
| ENSGALG00000006051 | 6105,2991 | -0,333204336 | 0,1106146 | -3,0123   | 0,0025928 | 0,0116542 | CDC7    |
| ENSGALG00000005177 | 21314,802 | -0,333333735 | 0,1014573 | -3,285458 | 0,0010182 | 0,0054171 | FAM120A |
| ENSGALG00000001976 | 9937,8689 | -0,333600989 | 0,1086579 | -3,070194 | 0,0021392 | 0,0099866 | TRIM33  |
| ENSGALG00000011704 | 13971,193 | -0,333952521 | 0,1117683 | -2,987901 | 0,002809  | 0,012486  | PTPLB   |
| ENSGALG00000010282 | 7159,3971 | -0,334004467 | 0,1089729 | -3,065022 | 0,0021765 | 0,0101207 | TMEM63B |
| ENSGALG00000026315 | 3315,4842 | -0,334081105 | 0,119333  | -2,799571 | 0,0051171 | 0,0204367 | RAB34   |
| ENSGALG00000015505 | 6307,2082 | -0,334198908 | 0,1151962 | -2,901129 | 0,0037182 | 0,0157558 | YTHDF3  |
| ENSGALG00000009332 | 24425,521 | -0,334253024 | 0,1022919 | -3,26764  | 0,0010845 | 0,0057141 | RBM25   |
| ENSGALG00000005042 | 3847,7663 | -0,334275581 | 0,1289111 | -2,593071 | 0,0095123 | 0,0337354 | IQSEC1  |
| ENSGALG00000003169 | 2023,2915 | -0,334437759 | 0,1334861 | -2,505413 | 0,0122309 | 0,0412084 | CBFB    |
| ENSGALG00000012130 | 1792,2693 | -0,334703976 | 0,1357589 | -2,46543  | 0,0136849 | 0,044964  | DNAJC24 |
| ENSGALG00000004325 | 13667,765 | -0,334704266 | 0,1162502 | -2,879172 | 0,0039872 | 0,0166514 | P4HA1   |
| ENSGALG00000004088 | 4344,9033 | -0,335048738 | 0,1281962 | -2,613561 | 0,0089604 | 0,0321873 | FNBP1   |
| ENSGALG00000009500 | 5544,5023 | -0,33525036  | 0,1244385 | -2,694104 | 0,0070578 | 0,0265889 | VPS50   |
| ENSGALG00000010733 | 14379,472 | -0,335293656 | 0,1230465 | -2,724935 | 0,0064314 | 0,0246658 | CEP170  |

|                    |           |              |           |           |           |           |               |
|--------------------|-----------|--------------|-----------|-----------|-----------|-----------|---------------|
| ENSGALG00000015858 | 4190,1025 | -0,335665691 | 0,1163166 | -2,885795 | 0,0039043 | 0,0163839 | DOPEY1        |
| ENSGALG00000004523 | 6662,5854 | -0,335874075 | 0,1147961 | -2,925833 | 0,0034354 | 0,0147175 | MFN2          |
| ENSGALG00000011533 | 4440,3034 | -0,335898283 | 0,1139943 | -2,946625 | 0,0032126 | 0,0139255 | XRCC3         |
| ENSGALG00000014298 | 14009,413 | -0,335955725 | 0,1061838 | -3,163909 | 0,0015567 | 0,0076817 | RFC1          |
| ENSGALG00000028471 | 3553,6714 | -0,335976223 | 0,1281632 | -2,621473 | 0,0087551 | 0,0316265 | CNPY3         |
| ENSGALG00000014822 | 2960,1308 | -0,336894676 | 0,1318948 | -2,554268 | 0,0106411 | 0,0369778 | CTC1          |
| ENSGALG00000003231 | 28849,937 | -0,336908133 | 0,1031629 | -3,265788 | 0,0010916 | 0,0057449 | KIF20A        |
| ENSGALG00000018800 | 6576,7401 | -0,337277222 | 0,1183588 | -2,849617 | 0,0043772 | 0,0179396 | POP1          |
| ENSGALG00000016898 | 2197,9018 | -0,33731956  | 0,1297596 | -2,599573 | 0,009334  | 0,0332327 | TGDS          |
| ENSGALG00000006617 | 7019,2341 | -0,337429872 | 0,117642  | -2,868278 | 0,0041271 | 0,0171209 | BCCIP         |
| ENSGALG00000009494 | 6742,6053 | -0,337457352 | 0,1118976 | -3,015769 | 0,0025633 | 0,0115407 | THAP5         |
| ENSGALG00000009410 | 4067,5004 | -0,337671951 | 0,1159276 | -2,912783 | 0,0035822 | 0,0152603 | PEX1          |
| ENSGALG00000009097 | 3815,7028 | -0,338568689 | 0,1171869 | -2,889135 | 0,003863  | 0,0162676 | SNAP23        |
| ENSGALG00000009464 | 6021,3203 | -0,338614502 | 0,1119841 | -3,023773 | 0,0024964 | 0,0113033 | GOLIM4        |
| ENSGALG00000014327 | 7067,9269 | -0,338948318 | 0,1081812 | -3,133152 | 0,0017294 | 0,0083614 | ARID4B        |
| ENSGALG00000002302 | 11281,327 | -0,339317581 | 0,1087619 | -3,119821 | 0,0018096 | 0,0086661 | YEATS2        |
| ENSGALG00000020569 | 5039,2721 | -0,339770586 | 0,1193898 | -2,845892 | 0,0044287 | 0,0181143 | DIMT1         |
| ENSGALG00000012617 | 6367,5718 | -0,339828609 | 0,1237855 | -2,745303 | 0,0060455 | 0,0234167 | TGFBF1        |
| ENSGALG00000000408 | 12091,853 | -0,339880371 | 0,121973  | -2,786521 | 0,0053277 | 0,0211518 | LSM7          |
| ENSGALG00000013403 | 2742,2413 | -0,340019904 | 0,1302877 | -2,609761 | 0,0090605 | 0,0324549 | MSANTD3       |
| ENSGALG00000004089 | 8925,1812 | -0,340215935 | 0,1167229 | -2,914732 | 0,0035599 | 0,0151891 | PRDM2         |
| ENSGALG00000005966 | 13999,743 | -0,340533213 | 0,1101239 | -3,092273 | 0,0019863 | 0,0093851 | SEC61A1       |
| ENSGALG00000016255 | 2201,4032 | -0,340652705 | 0,131986  | -2,580977 | 0,0098521 | 0,0347594 | RPGR          |
| ENSGALG00000006601 | 4208,8165 | -0,340895714 | 0,1177608 | -2,894815 | 0,0037938 | 0,0160114 | MTMR14        |
| ENSGALG00000012202 | 8130,087  | -0,341191282 | 0,1080608 | -3,157402 | 0,0015918 | 0,0078127 | KBTBD2        |
| ENSGALG00000004759 | 3321,8502 | -0,341574811 | 0,1390989 | -2,455626 | 0,0140639 | 0,0459627 | DHRS7B        |
| ENSGALG00000007989 | 28672,589 | -0,341827011 | 0,1092587 | -3,128603 | 0,0017564 | 0,0084619 | ADNP          |
| ENSGALG00000003263 | 5162,4302 | -0,341906085 | 0,1243755 | -2,748982 | 0,0059781 | 0,0232054 | SFXN1         |
| ENSGALG00000010361 | 9329,7103 | -0,342127455 | 0,1233327 | -2,774021 | 0,0055368 | 0,0218567 | MBNL1         |
| ENSGALG00000004515 | 10691,241 | -0,342166688 | 0,1169935 | -2,924664 | 0,0034483 | 0,014759  | KNTC1         |
| ENSGALG00000010541 | 14976,655 | -0,3427229   | 0,1277901 | -2,681921 | 0,0073201 | 0,02741   | BIRC6         |
| ENSGALG00000004628 | 2015,8556 | -0,342763414 | 0,1400684 | -2,447115 | 0,0144005 | 0,0467957 | CTNS          |
| ENSGALG00000005237 | 11277,397 | -0,342909039 | 0,1056363 | -3,24613  | 0,0011699 | 0,0060815 | FGD3          |
| ENSGALG00000005420 | 7995,347  | -0,343276467 | 0,1261306 | -2,721596 | 0,0064967 | 0,0248884 | AATF          |
| ENSGALG00000002648 | 3882,3909 | -0,343349251 | 0,1203014 | -2,854076 | 0,0043162 | 0,017756  | FUK           |
| ENSGALG00000016314 | 22102,711 | -0,343364339 | 0,1069912 | -3,209276 | 0,0013307 | 0,0067704 | ELOVL5        |
| ENSGALG00000006455 | 4218,2466 | -0,343579981 | 0,1158475 | -2,965794 | 0,003019  | 0,0132318 | SMPD4         |
| ENSGALG00000012239 | 9046,4232 | -0,343596083 | 0,1058983 | -3,244586 | 0,0011762 | 0,0061076 | METAP1        |
| ENSGALG00000004624 | 11632,549 | -0,34416889  | 0,1347829 | -2,553506 | 0,0106645 | 0,0370494 | MYO5A         |
| ENSGALG00000003365 | 1822,7969 | -0,344340057 | 0,1360837 | -2,530355 | 0,0113947 | 0,0389601 | RAD1          |
| ENSGALG00000002527 | 4444,3372 | -0,344545241 | 0,1227619 | -2,806613 | 0,0050065 | 0,0200778 | TMEM201       |
| ENSGALG00000009813 | 1922,5946 | -0,344705696 | 0,1334833 | -2,582388 | 0,0098119 | 0,0346715 | B0LHV3_CHICK  |
| ENSGALG00000013053 | 3803,4898 | -0,345339591 | 0,1218833 | -2,833364 | 0,0046061 | 0,0186977 | MTRR          |
| ENSGALG00000001494 | 9000,8803 | -0,345374318 | 0,1246336 | -2,771118 | 0,0055864 | 0,021976  | NISCH         |
| ENSGALG00000011884 | 7925,1907 | -0,345461445 | 0,1150003 | -3,004005 | 0,0026645 | 0,0119412 | EXOSC9        |
| ENSGALG00000001236 | 5792,0595 | -0,345759524 | 0,1103803 | -3,132439 | 0,0017336 | 0,0083777 | ZBTB26        |
| ENSGALG00000005261 | 15832,957 | -0,345768981 | 0,1275962 | -2,70987  | 0,006731  | 0,0256198 | RP11-403P17.5 |
| ENSGALG00000012837 | 7840,9496 | -0,345878883 | 0,1096612 | -3,154068 | 0,0016101 | 0,0078884 | EXOC2         |
| ENSGALG00000006307 | 2423,8788 | -0,346032557 | 0,1338086 | -2,586026 | 0,009709  | 0,0343344 | NSMCE1        |
| ENSGALG00000003434 | 9368,6549 | -0,346127339 | 0,1194628 | -2,897364 | 0,0037631 | 0,0159164 | C17orf75      |
| ENSGALG00000006153 | 2844,7772 | -0,346474519 | 0,1286035 | -2,69413  | 0,0070573 | 0,0265889 | EXOGE         |
| ENSGALG00000006475 | 6864,1942 | -0,347016477 | 0,1079405 | -3,214886 | 0,001305  | 0,0066643 | KIAA0430      |
| ENSGALG00000002276 | 1478,127  | -0,34721896  | 0,1416798 | -2,45073  | 0,0142567 | 0,0464477 | EME2          |
| ENSGALG00000015553 | 10445,976 | -0,347410904 | 0,1127    | -3,082616 | 0,0020519 | 0,0096499 | ARFGEF1       |
| ENSGALG00000011831 | 9083,6449 | -0,347478626 | 0,1108523 | -3,13461  | 0,0017208 | 0,0083259 | ANKRD50       |
| ENSGALG00000004269 | 64393,653 | -0,347526191 | 0,103785  | -3,348521 | 0,0008124 | 0,0044938 | EIF3B         |
| ENSGALG00000004548 | 15606,046 | -0,347529204 | 0,1215975 | -2,85803  | 0,0042628 | 0,0175766 | RP11-101E3.5  |
| ENSGALG00000005477 | 8038,2726 | -0,347589933 | 0,1308189 | -2,657031 | 0,0078832 | 0,0291104 | MPHOSPH6      |
| ENSGALG00000004200 | 11378,582 | -0,347970886 | 0,1075116 | -3,236588 | 0,0012097 | 0,0062623 | DPP9          |
| ENSGALG00000012364 | 4848,5693 | -0,348109095 | 0,1264902 | -2,752064 | 0,0059221 | 0,0230238 | PPIL4         |
| ENSGALG00000016887 | 64639,106 | -0,348222743 | 0,0978749 | -3,557836 | 0,0003739 | 0,002345  | IPO5          |
| ENSGALG00000013649 | 18631,187 | -0,348311839 | 0,1020152 | -3,414312 | 0,0006394 | 0,003678  | CNOT7         |

|                     |           |              |           |           |           |           |              |
|---------------------|-----------|--------------|-----------|-----------|-----------|-----------|--------------|
| ENSGALG00000017241  | 2897,41   | -0,348538577 | 0,1300034 | -2,680995 | 0,0073404 | 0,0274784 | TMEM135      |
| ENSGALG00000016931  | 5043,2864 | -0,348656857 | 0,1247665 | -2,794476 | 0,0051984 | 0,0207069 | BORA         |
| ENSGALG00000002469  | 8118,1027 | -0,348923543 | 0,1164279 | -2,996907 | 0,0027273 | 0,0121867 | CDC73        |
| ENSGALG00000004168  | 7087,525  | -0,349365069 | 0,1171636 | -2,981857 | 0,0028651 | 0,0126896 | FEM1A        |
| ENSGALG000000027444 | 3608,9781 | -0,349517124 | 0,1245455 | -2,806341 | 0,0050108 | 0,0200861 |              |
| ENSGALG00000017139  | 10651,91  | -0,349554954 | 0,107047  | -3,265433 | 0,001093  | 0,0057499 | ZMYM2        |
| ENSGALG00000002719  | 17659,446 | -0,349571816 | 0,1018084 | -3,433625 | 0,0005956 | 0,0034712 | CSNK1D       |
| ENSGALG00000008645  | 8917,9646 | -0,349922505 | 0,1156037 | -3,026915 | 0,0024706 | 0,0112201 | NKRF         |
| ENSGALG00000004042  | 4817,4388 | -0,349988244 | 0,1306697 | -2,67842  | 0,007397  | 0,0276565 | NUFIP2       |
| ENSGALG00000009633  | 4605,1827 | -0,350007911 | 0,1141085 | -3,067326 | 0,0021598 | 0,0100534 | KATNBL1      |
| ENSGALG00000007500  | 4924,5265 | -0,350118918 | 0,1432067 | -2,44485  | 0,0144912 | 0,047043  | DENND4A      |
| ENSGALG00000009249  | 5232,7054 | -0,350123017 | 0,1287908 | -2,71854  | 0,0065571 | 0,0250618 | UBR1         |
| ENSGALG00000008454  | 36878,682 | -0,351028215 | 0,1038189 | -3,38116  | 0,0007218 | 0,0040828 | NOP58        |
| ENSGALG00000016727  | 9641,1293 | -0,351861521 | 0,1225244 | -2,871766 | 0,0040818 | 0,0169796 | JADE3        |
| ENSGALG00000001023  | 2133,9525 | -0,352229585 | 0,1347749 | -2,613466 | 0,0089629 | 0,0321873 | BZRAP1       |
| ENSGALG00000017026  | 9366,3877 | -0,352330056 | 0,1086684 | -3,24225  | 0,0011859 | 0,0061532 | VPS36        |
| ENSGALG00000007861  | 11084,886 | -0,352469383 | 0,1082462 | -3,256183 | 0,0011292 | 0,0059177 | MAGT1        |
| ENSGALG00000005569  | 11340,438 | -0,352585966 | 0,10935   | -3,224379 | 0,0012625 | 0,00648   | USP47        |
| ENSGALG00000009283  | 5220,1674 | -0,352608684 | 0,1245251 | -2,831627 | 0,0046312 | 0,0187848 | KIAA1715     |
| ENSGALG00000006612  | 7533,7656 | -0,353107966 | 0,1223847 | -2,885229 | 0,0039113 | 0,0164004 | ASXL1        |
| ENSGALG00000009913  | 62516,864 | -0,353547892 | 0,0988051 | -3,578237 | 0,0003459 | 0,0021977 | SMARCA5      |
| ENSGALG00000011620  | 9603,3836 | -0,353615473 | 0,1055478 | -3,350286 | 0,0008073 | 0,0044752 | AKT1         |
| ENSGALG00000010177  | 12046,319 | -0,353917428 | 0,1080741 | -3,274766 | 0,0010575 | 0,0056001 | ZFC3H1       |
| ENSGALG00000015043  | 11145,365 | -0,35411601  | 0,1099631 | -3,220318 | 0,0012805 | 0,006559  | RPF2         |
| ENSGALG00000011368  | 2716,7046 | -0,354344153 | 0,1315134 | -2,694357 | 0,0070525 | 0,0265834 | ZNF839       |
| ENSGALG00000015024  | 3631,7153 | -0,355056011 | 0,138118  | -2,570671 | 0,0101502 | 0,0355805 | RCL1         |
| ENSGALG00000013863  | 3597,6259 | -0,35519316  | 0,1205708 | -2,94593  | 0,0032199 | 0,0139435 | PSMG2        |
| ENSGALG00000009380  | 1987,1722 | -0,355339175 | 0,1456281 | -2,440045 | 0,0146854 | 0,0475709 | ST7          |
| ENSGALG00000008036  | 5782,6274 | -0,355406874 | 0,1116416 | -3,183463 | 0,0014552 | 0,0072656 | TMEM209      |
| ENSGALG00000014383  | 9301,5506 | -0,355665092 | 0,1163485 | -3,056896 | 0,0022364 | 0,0103287 | PI4K2B       |
| ENSGALG00000010805  | 16069,419 | -0,355813089 | 0,1260649 | -2,822459 | 0,0047657 | 0,0192708 | USP24        |
| ENSGALG00000021031  | 4102,9147 | -0,355958904 | 0,1319256 | -2,698179 | 0,006972  | 0,0263165 | ACKR3        |
| ENSGALG00000005125  | 7959,3271 | -0,356020767 | 0,1067406 | -3,335383 | 0,0008518 | 0,0046764 | LSM14B       |
| ENSGALG00000012717  | 4761,9391 | -0,356301296 | 0,1163989 | -3,061036 | 0,0022057 | 0,0102355 | NFYB         |
| ENSGALG00000006123  | 7411,1798 | -0,356657256 | 0,13028   | -2,73762  | 0,0061885 | 0,0238689 | RTEL1        |
| ENSGALG00000006254  | 6379,7603 | -0,357023226 | 0,1173769 | -3,041681 | 0,0023526 | 0,0107811 | ERCC6        |
| ENSGALG00000001811  | 14773,974 | -0,357025162 | 0,1141916 | -3,126546 | 0,0017687 | 0,0085114 | RP4-614O4.11 |
| ENSGALG00000003441  | 4610,7331 | -0,357140672 | 0,1182742 | -3,0196   | 0,0025311 | 0,0114298 | GTF3C5       |
| ENSGALG00000008957  | 22456,525 | -0,357191503 | 0,1156693 | -3,088042 | 0,0020148 | 0,0094985 | MSH6         |
| ENSGALG00000012782  | 4940,896  | -0,35754473  | 0,1182911 | -3,022584 | 0,0025063 | 0,0113327 | BLOC1S5      |
| ENSGALG00000013657  | 2568,382  | -0,35785969  | 0,136842  | -2,615131 | 0,0089193 | 0,0320837 | ZNF236       |
| ENSGALG00000008218  | 3293,8403 | -0,357888042 | 0,1386724 | -2,580816 | 0,0098567 | 0,0347614 | DDB2         |
| ENSGALG00000009330  | 6639,4947 | -0,358006963 | 0,1142065 | -3,134734 | 0,0017201 | 0,0083253 | DEGS1        |
| ENSGALG00000010763  | 6453,8983 | -0,358059956 | 0,1126815 | -3,177629 | 0,0014848 | 0,0073728 | TRIP11       |
| ENSGALG00000008507  | 23518,146 | -0,358201653 | 0,1023769 | -3,498854 | 0,0004673 | 0,0028338 | THOC2        |
| ENSGALG00000009839  | 30979,576 | -0,358257804 | 0,1012165 | -3,539518 | 0,0004009 | 0,002491  | PPIG         |
| ENSGALG00000010349  | 7048,1543 | -0,358393493 | 0,1129044 | -3,174309 | 0,0015019 | 0,0074414 | POLR1C       |
| ENSGALG00000007721  | 11622,16  | -0,358457512 | 0,1098179 | -3,264109 | 0,0010981 | 0,0057724 | ARHGAP21     |
| ENSGALG00000012414  | 1870,7753 | -0,358664924 | 0,1359051 | -2,639084 | 0,0083131 | 0,0303275 | GNPNAT1      |
| ENSGALG00000016419  | 4650,1008 | -0,358846606 | 0,1220043 | -2,941261 | 0,0032688 | 0,0141048 | ASAP2        |
| ENSGALG00000002399  | 4037,3816 | -0,359044332 | 0,1192358 | -3,011213 | 0,0026021 | 0,01169   | GTF2H2       |
| ENSGALG00000014795  | 5578,5367 | -0,359083857 | 0,1276747 | -2,812491 | 0,0049159 | 0,0198137 | TGIF1        |
| ENSGALG00000005694  | 30867,661 | -0,359162398 | 0,1021823 | -3,514918 | 0,0004399 | 0,0026893 | GARS         |
| ENSGALG00000016598  | 5686,2877 | -0,359376196 | 0,1202475 | -2,988638 | 0,0028022 | 0,0124641 | MSL3         |
| ENSGALG00000008254  | 17757,266 | -0,35964551  | 0,1079509 | -3,331565 | 0,0008636 | 0,0047277 | ANAPC1       |
| ENSGALG00000007683  | 31803,136 | -0,359759566 | 0,1106419 | -3,251567 | 0,0011477 | 0,0059985 |              |
| ENSGALG00000005374  | 3276,9339 | -0,359759753 | 0,1426205 | -2,522497 | 0,0116525 | 0,0396423 | MYO19        |
| ENSGALG00000004670  | 7571,3318 | -0,360055666 | 0,109156  | -3,298544 | 0,0009719 | 0,0052095 | ATRIP        |
| ENSGALG00000024039  | 12181,866 | -0,36099515  | 0,1049573 | -3,439449 | 0,0005829 | 0,0034066 | UTP14A       |
| ENSGALG00000004379  | 20460,522 | -0,361272684 | 0,1033693 | -3,494972 | 0,0004741 | 0,0028704 | BCL7A        |
| ENSGALG00000000463  | 2471,2656 | -0,361708293 | 0,131949  | -2,741273 | 0,0061202 | 0,0236453 | DDX25        |
| ENSGALG00000006955  | 3003,9828 | -0,36242424  | 0,1397632 | -2,59313  | 0,0095107 | 0,0337354 | CCNJ         |

|                     |           |              |            |           |           |           |               |
|---------------------|-----------|--------------|------------|-----------|-----------|-----------|---------------|
| ENSGALG00000012763  | 12297,883 | -0,362574608 | 0,1084037  | -3,344671 | 0,0008238 | 0,0045427 | GNPTAB        |
| ENSGALG00000001942  | 6053,3632 | -0,362623052 | 0,1158608  | -3,129817 | 0,0017492 | 0,0084479 | SPDL1         |
| ENSGALG000000012638 | 9149,4343 | -0,362691803 | 0,1227328  | -2,955134 | 0,0031253 | 0,0136121 | CRY1          |
| ENSGALG000000012916 | 8111,1057 | -0,362729901 | 0,1091942  | -3,321879 | 0,0008941 | 0,0048792 | DROSHA        |
| ENSGALG000000002139 | 98917,168 | -0,362887161 | 0,1016046  | -3,571563 | 0,0003549 | 0,0022423 | CSDE1         |
| ENSGALG000000009325 | 21860,643 | -0,363294006 | 0,11110082 | -3,272678 | 0,0010653 | 0,0056394 | OLA1          |
| ENSGALG000000015993 | 4919,2212 | -0,363761464 | 0,123068   | -2,955776 | 0,0031188 | 0,0135925 | MTERF3        |
| ENSGALG000000015363 | 3478,9826 | -0,363849789 | 0,1186073  | -3,067684 | 0,0021572 | 0,0100482 | HJURP         |
| ENSGALG000000003826 | 8394,886  | -0,363869123 | 0,1071172  | -3,396925 | 0,0006815 | 0,0038903 | RP11-478C19.2 |
| ENSGALG000000001790 | 14734,645 | -0,363943316 | 0,1104661  | -3,294616 | 0,0009856 | 0,0052683 | RP11-318A15.7 |
| ENSGALG000000004553 | 9745,0828 | -0,363967467 | 0,1049477  | -3,468085 | 0,0005242 | 0,0031206 | SGPL1         |
| ENSGALG000000002471 | 4521,5673 | -0,363984132 | 0,1261711  | -2,884846 | 0,0039161 | 0,0164153 | ZNF592        |
| ENSGALG000000001663 | 10259,573 | -0,364202029 | 0,1099047  | -3,3138   | 0,0009204 | 0,0049964 | MAK16         |
| ENSGALG000000007199 | 3668,9433 | -0,36428019  | 0,1273389  | -2,860714 | 0,0042269 | 0,0174655 | TRIAP1        |
| ENSGALG000000010900 | 12043,923 | -0,364291872 | 0,1128172  | -3,229045 | 0,001242  | 0,0064006 | SPC25         |
| ENSGALG000000010618 | 2510,6274 | -0,364367021 | 0,127904   | -2,848755 | 0,0043891 | 0,0179775 | SLC30A6       |
| ENSGALG000000003563 | 13287,766 | -0,364389392 | 0,1101047  | -3,309482 | 0,0009347 | 0,0050615 | YARS          |
| ENSGALG000000000638 | 12789,677 | -0,364411808 | 0,1251634  | -2,911488 | 0,0035971 | 0,0153046 | UTP4          |
| ENSGALG000000010006 | 4182,5012 | -0,364534028 | 0,1219632  | -2,988885 | 0,0028    | 0,0124581 | SLC10A7       |
| ENSGALG000000002137 | 15220,893 | -0,364569255 | 0,1047688  | -3,479749 | 0,0005019 | 0,0030089 | PGAM5         |
| ENSGALG000000004485 | 1975,7552 | -0,364730971 | 0,1340663  | -2,720526 | 0,0065178 | 0,024948  | DOLPP1        |
| ENSGALG000000004467 | 5426,4673 | -0,365351749 | 0,1191675  | -3,065867 | 0,0021704 | 0,0100991 | CLIP1         |
| ENSGALG000000001126 | 13435,921 | -0,365650894 | 0,1039475  | -3,51765  | 0,0004354 | 0,0026666 | CHAF1A        |
| ENSGALG000000003674 | 4753,1822 | -0,365887371 | 0,1502656  | -2,434938 | 0,0148943 | 0,0481221 | DHTKD1        |
| ENSGALG000000015874 | 13228,099 | -0,365980992 | 0,1079617  | -3,389915 | 0,0006991 | 0,0039761 | TTK           |
| ENSGALG000000003339 | 10767,061 | -0,366040447 | 0,1177244  | -3,109301 | 0,0018753 | 0,0089243 | MTOR          |
| ENSGALG000000010400 | 7431,8392 | -0,366106792 | 0,1070902  | -3,418676 | 0,0006293 | 0,0036317 | SMARCAD1      |
| ENSGALG000000012205 | 2497,2514 | -0,366370844 | 0,1293829  | -2,831679 | 0,0046304 | 0,0187848 | AVL9          |
| ENSGALG000000014867 | 5553,4309 | -0,366420731 | 0,1173966  | -3,12122  | 0,001801  | 0,0086359 | PAIP1         |
| ENSGALG000000006193 | 20925,466 | -0,366551091 | 0,1152835  | -3,179563 | 0,001475  | 0,0073322 | TXNRD3        |
| ENSGALG000000012807 | 3029,2492 | -0,366699033 | 0,1239604  | -2,958195 | 0,0030945 | 0,0135079 | RPP40         |
| ENSGALG000000009587 | 5817,192  | -0,366858159 | 0,1201432  | -3,053508 | 0,0022618 | 0,0104283 | GPHN          |
| ENSGALG000000011242 | 2355,7326 | -0,367017354 | 0,1308827  | -2,80417  | 0,0050446 | 0,0202098 | OBSL1         |
| ENSGALG000000005353 | 4596,566  | -0,367159893 | 0,1195448  | -3,071317 | 0,0021312 | 0,009954  | FAR1          |
| ENSGALG000000001872 | 9491,7801 | -0,367383699 | 0,1243406  | -2,954657 | 0,0031302 | 0,0136288 | SDF4          |
| ENSGALG000000015683 | 11433,193 | -0,367498221 | 0,1101651  | -3,335886 | 0,0008503 | 0,0046699 | GNG10         |
| ENSGALG000000003171 | 20304,055 | -0,367614474 | 0,1019213  | -3,606847 | 0,0003099 | 0,0019961 | IREB2         |
| ENSGALG000000028828 | 22676,693 | -0,367651199 | 0,1028075  | -3,576112 | 0,0003487 | 0,0022146 | EIF4E         |
| ENSGALG000000009637 | 4483,6182 | -0,367846509 | 0,1376888  | -2,671578 | 0,0075495 | 0,0281146 | EMC7          |
| ENSGALG000000013100 | 3042,9761 | -0,368006107 | 0,1414611  | -2,601465 | 0,0092826 | 0,0330933 | GRB10         |
| ENSGALG000000015009 | 1981,8828 | -0,368164733 | 0,1354772  | -2,71754  | 0,0065769 | 0,0251107 | ZBTB49        |
| ENSGALG000000024159 | 24561,804 | -0,368265263 | 0,1065192  | -3,457267 | 0,0005457 | 0,0032246 |               |
| ENSGALG000000003881 | 9972,6997 | -0,368271023 | 0,1180506  | -3,119604 | 0,0018109 | 0,0086695 | ERCC6L        |
| ENSGALG000000015957 | 2851,4747 | -0,368440661 | 0,1383223  | -2,663638 | 0,0077301 | 0,0286811 | RNF151        |
| ENSGALG000000001619 | 9403,9871 | -0,368532524 | 0,1142023  | -3,227015 | 0,0012509 | 0,006434  | ATG16L1       |
| ENSGALG000000004115 | 26356,095 | -0,369026879 | 0,1077431  | -3,425063 | 0,0006147 | 0,0035687 | DNAJA2        |
| ENSGALG000000012266 | 5845,0519 | -0,369135559 | 0,1123441  | -3,285757 | 0,0010171 | 0,0054135 | LRRFIP2       |
| ENSGALG000000015355 | 10608,533 | -0,369224786 | 0,1221453  | -3,022833 | 0,0025042 | 0,0113271 | CD47          |
| ENSGALG000000008526 | 11139,841 | -0,369313202 | 0,1088311  | -3,393452 | 0,0006902 | 0,003935  | BRD1          |
| ENSGALG000000001618 | 4391,5637 | -0,369471319 | 0,1261006  | -2,929973 | 0,0033899 | 0,0145504 | OGFOD3        |
| ENSGALG000000001485 | 7897,8046 | -0,369653264 | 0,1079491  | -3,424331 | 0,0006163 | 0,0035753 | TOP3B         |
| ENSGALG000000012263 | 9464,4086 | -0,36996383  | 0,1064406  | -3,475778 | 0,0005094 | 0,0030417 | NEMF          |
| ENSGALG000000007509 | 10510,151 | -0,37005709  | 0,1074005  | -3,44558  | 0,0005698 | 0,0033455 | GNAS          |
| ENSGALG000000008807 | 7903,608  | -0,370129883 | 0,107044   | -3,457735 | 0,0005447 | 0,0032218 | DCUN1D1       |
| ENSGALG000000009547 | 3006,9462 | -0,370182446 | 0,1224834  | -3,022307 | 0,0025086 | 0,0113355 | PPHLN1        |
| ENSGALG000000014582 | 21606,21  | -0,370326496 | 0,1092612  | -3,389368 | 0,0007005 | 0,0039824 | CADM1         |
| ENSGALG000000010052 | 1789,2611 | -0,370466621 | 0,138855   | -2,668012 | 0,0076302 | 0,0283683 | PPP2R3C       |
| ENSGALG000000010296 | 6483,9405 | -0,370634079 | 0,1153594  | -3,212864 | 0,0013142 | 0,0067014 | MRPS18A       |
| ENSGALG000000011215 | 4111,7689 | -0,370718656 | 0,1158847  | -3,199029 | 0,0013789 | 0,0069662 | POC1B         |
| ENSGALG000000004254 | 3591,4431 | -0,370755667 | 0,1184788  | -3,1293   | 0,0017522 | 0,0084598 | TMEM120B      |
| ENSGALG000000015649 | 13211,542 | -0,370890117 | 0,1067035  | -3,475894 | 0,0005092 | 0,0030417 | NOP14         |
| ENSGALG000000008557 | 15377,869 | -0,371010327 | 0,1075723  | -3,44894  | 0,0005628 | 0,0033142 | ARL5B         |

|                    |           |              |           |           |           |           |          |
|--------------------|-----------|--------------|-----------|-----------|-----------|-----------|----------|
| ENSGALG00000004224 | 5462,5737 | -0,371126705 | 0,1408849 | -2,634254 | 0,0084322 | 0,0306998 | MAD1L1   |
| ENSGALG00000008795 | 3264,8024 | -0,371277159 | 0,1212162 | -3,062934 | 0,0021918 | 0,0101812 | GPAM     |
| ENSGALG00000006586 | 3512,8975 | -0,371428946 | 0,1391432 | -2,6694   | 0,0075987 | 0,0282744 | PLAGL2   |
| ENSGALG00000016614 | 8922,873  | -0,371522735 | 0,1401003 | -2,651835 | 0,0080056 | 0,0294504 | SHROOM2  |
| ENSGALG00000015847 | 1545,0428 | -0,371535052 | 0,1402786 | -2,64855  | 0,0080838 | 0,02965   | PRSS35   |
| ENSGALG00000009817 | 1241,5525 | -0,371617458 | 0,1484632 | -2,503095 | 0,0123113 | 0,041428  | ZNF770   |
| ENSGALG00000005935 | 6194,9397 | -0,371684146 | 0,110711  | -3,357247 | 0,0007872 | 0,0043945 | EVI5     |
| ENSGALG00000009807 | 6561,2068 | -0,371941676 | 0,1238286 | -3,003683 | 0,0026673 | 0,011946  | FLVCR1   |
| ENSGALG00000004834 | 12710,539 | -0,372460145 | 0,1085125 | -3,432418 | 0,0005982 | 0,0034837 | COPS3    |
| ENSGALG00000016578 | 7057,3465 | -0,372483757 | 0,11837   | -3,146774 | 0,0016508 | 0,0080444 |          |
| ENSGALG00000003039 | 8776,92   | -0,372512284 | 0,1093684 | -3,406031 | 0,0006591 | 0,0037723 | SRM      |
| ENSGALG00000008787 | 2268,5743 | -0,372527529 | 0,1464722 | -2,543332 | 0,0109801 | 0,0379137 | CEP68    |
| ENSGALG00000015705 | 13014,296 | -0,372615903 | 0,1210163 | -3,079056 | 0,0020766 | 0,0097424 | WHSC1    |
| ENSGALG00000015800 | 3887,9053 | -0,37263738  | 0,128126  | -2,908367 | 0,0036332 | 0,0154341 | ORC3     |
| ENSGALG00000011713 | 7918,9457 | -0,372947939 | 0,1156001 | -3,226189 | 0,0012545 | 0,0064477 | CDV3     |
| ENSGALG00000001513 | 6151,0051 | -0,373009041 | 0,1249789 | -2,984577 | 0,0028397 | 0,0125937 | CNTRL    |
| ENSGALG00000023536 | 26304,92  | -0,373188455 | 0,1263177 | -2,954363 | 0,0031332 | 0,0136331 | FZD7     |
| ENSGALG00000000412 | 5015,4199 | -0,373361237 | 0,1191944 | -3,132372 | 0,001734  | 0,0083777 | CCDC15   |
| ENSGALG00000003942 | 9873,2639 | -0,373719716 | 0,1078722 | -3,464467 | 0,0005313 | 0,0031559 | LONP2    |
| ENSGALG00000016236 | 30922,987 | -0,374432078 | 0,1135095 | -3,298685 | 0,0009714 | 0,0052095 | USP9X    |
| ENSGALG00000005618 | 12381,341 | -0,374714579 | 0,1064892 | -3,518803 | 0,0004335 | 0,002661  | CTR9     |
| ENSGALG00000010744 | 5078,2186 | -0,375014992 | 0,1175988 | -3,188937 | 0,001428  | 0,0071662 | GALNT7   |
| ENSGALG00000012689 | 4208,649  | -0,375087396 | 0,1416897 | -2,647245 | 0,0081151 | 0,0297327 | KIF13A   |
| ENSGALG00000001939 | 11757,482 | -0,375413327 | 0,1227756 | -3,057719 | 0,0022303 | 0,0103145 | HIPK1    |
| ENSGALG00000009626 | 5852,8685 | -0,375704266 | 0,1201786 | -3,126215 | 0,0017707 | 0,0085128 | THBS1    |
| ENSGALG00000021251 | 12519,129 | -0,375765974 | 0,1228993 | -3,057511 | 0,0022318 | 0,0103145 | DDX6     |
| ENSGALG00000003325 | 1577,6189 | -0,375811622 | 0,1416562 | -2,652984 | 0,0079784 | 0,029382  | KMT5A    |
| ENSGALG00000013034 | 8837,0774 | -0,375844048 | 0,1530686 | -2,455396 | 0,0140729 | 0,045981  | CECR2    |
| ENSGALG00000009677 | 24959,786 | -0,376298569 | 0,10418   | -3,612004 | 0,0003038 | 0,0019633 | SSB      |
| ENSGALG00000003776 | 26231,392 | -0,376541512 | 0,1408091 | -2,674127 | 0,0074924 | 0,0279477 | PRRC2B   |
| ENSGALG00000004867 | 10358,587 | -0,376546151 | 0,1068635 | -3,523619 | 0,0004257 | 0,0026261 | CEBPG    |
| ENSGALG00000000085 | 18552,019 | -0,37666785  | 0,1073497 | -3,508793 | 0,0004501 | 0,0027434 | GFPT1    |
| ENSGALG00000007929 | 3448,5443 | -0,376720223 | 0,1459515 | -2,581133 | 0,0098477 | 0,0347594 | DIXDC1   |
| ENSGALG00000011281 | 6523,2043 | -0,37690737  | 0,1178655 | -3,197776 | 0,0013849 | 0,0069939 | SGOL1    |
| ENSGALG00000003740 | 3014,38   | -0,377276945 | 0,1362236 | -2,769542 | 0,0056135 | 0,0220587 | IKBKB    |
| ENSGALG00000016337 | 3166,2527 | -0,377573201 | 0,1356955 | -2,782504 | 0,0053941 | 0,0213616 | TATDN1   |
| ENSGALG00000012251 | 2154,1949 | -0,377607005 | 0,1483053 | -2,546147 | 0,0108919 | 0,0376475 | KDEL3    |
| ENSGALG00000008247 | 7600,6846 | -0,377692943 | 0,109538  | -3,448054 | 0,0005646 | 0,0033222 | ARFGAP2  |
| ENSGALG00000005006 | 11070,754 | -0,377708377 | 0,1075988 | -3,510339 | 0,0004475 | 0,0027311 | UBA2     |
| ENSGALG00000000978 | 4782,6943 | -0,377763607 | 0,1179131 | -3,203745 | 0,0013565 | 0,0068761 | CEP104   |
| ENSGALG00000013146 | 5329,2902 | -0,377879987 | 0,1326893 | -2,847857 | 0,0044015 | 0,0180229 | PLXNB2   |
| ENSGALG00000006558 | 1973,6885 | -0,378031821 | 0,1426055 | -2,650891 | 0,008028  | 0,0295009 | WDR60    |
| ENSGALG00000005468 | 6023,6864 | -0,378125454 | 0,1402851 | -2,695408 | 0,0070303 | 0,026507  | SYNRG    |
| ENSGALG00000009093 | 6655,7671 | -0,378156036 | 0,1279163 | -2,956277 | 0,0031138 | 0,0135748 | PN01     |
| ENSGALG00000002985 | 14604,542 | -0,378678888 | 0,1056758 | -3,583404 | 0,0003391 | 0,0021617 | UTP18    |
| ENSGALG00000016200 | 6807,9958 | -0,378720539 | 0,1505954 | -2,514821 | 0,0119093 | 0,0403647 | SIK1     |
| ENSGALG00000016851 | 8342,7517 | -0,378897954 | 0,1201029 | -3,154778 | 0,0016062 | 0,0078758 | ARHGEF7  |
| ENSGALG00000008195 | 5727,1148 | -0,378910892 | 0,1131533 | -3,348651 | 0,0008121 | 0,0044938 | NPHP1    |
| ENSGALG00000003326 | 2369,3349 | -0,379089886 | 0,1276328 | -2,97016  | 0,0029764 | 0,0130808 | AMACR    |
| ENSGALG00000011015 | 2757,9302 | -0,379357377 | 0,1543896 | -2,457143 | 0,0140047 | 0,045791  | NTPCR    |
| ENSGALG00000014085 | 1445,5651 | -0,379926489 | 0,1417435 | -2,68038  | 0,0073539 | 0,0275214 | TM7SF3   |
| ENSGALG00000006011 | 4210,2643 | -0,380179632 | 0,1512099 | -2,51425  | 0,0119286 | 0,040409  | KIAA0753 |
| ENSGALG00000024047 | 6900,307  | -0,380223912 | 0,115759  | -3,284616 | 0,0010212 | 0,0054312 | MYCL     |
| ENSGALG00000003322 | 2664,8777 | -0,380407199 | 0,1320573 | -2,880623 | 0,0039689 | 0,0165858 | TBC1D2B  |
| ENSGALG00000007036 | 8649,5744 | -0,380541953 | 0,1060007 | -3,589994 | 0,0003307 | 0,0021167 | PITRM1   |
| ENSGALG00000005573 | 47811,321 | -0,380592325 | 0,1004918 | -3,787297 | 0,0001523 | 0,0010811 | NOLC1    |
| ENSGALG00000008187 | 22960,701 | -0,380821067 | 0,1023642 | -3,720256 | 0,000199  | 0,0013569 | EIF3J    |
| ENSGALG00000000864 | 4682,0682 | -0,380939683 | 0,115984  | -3,284416 | 0,0010219 | 0,0054329 | FBXW2    |
| ENSGALG00000004696 | 6529,7846 | -0,381141883 | 0,109965  | -3,46603  | 0,0005282 | 0,0031404 | LEO1     |
| ENSGALG00000011330 | 86092,558 | -0,381207584 | 0,1173583 | -3,248237 | 0,0011612 | 0,0060506 | DYNC1H1  |
| ENSGALG00000000543 | 2560,0751 | -0,381260503 | 0,1306196 | -2,91886  | 0,0035131 | 0,0150036 | TNFRSF9  |
| ENSGALG00000005776 | 1699,2203 | -0,38126111  | 0,1437588 | -2,65209  | 0,0079995 | 0,0294363 | TECR     |



|                    |           |              |           |           |           |           |          |
|--------------------|-----------|--------------|-----------|-----------|-----------|-----------|----------|
| ENSGALG00000007354 | 7140,2177 | -0,381532857 | 0,1451021 | -2,629409 | 0,0085533 | 0,0310378 | CIT      |
| ENSGALG00000011484 | 5458,5585 | -0,381581605 | 0,1495733 | -2,551135 | 0,0107373 | 0,0372359 | CMTM8    |
| ENSGALG00000012953 | 7564,6193 | -0,381744469 | 0,1101496 | -3,465692 | 0,0005289 | 0,003143  | IPO8     |
| ENSGALG00000007559 | 4279,2164 | -0,381904484 | 0,1214524 | -3,144479 | 0,0016638 | 0,0080933 | PDSS1    |
| ENSGALG00000017333 | 5175,4799 | -0,382465165 | 0,1273235 | -3,003886 | 0,0026656 | 0,0119419 | LCMT2    |
| ENSGALG00000010680 | 1744,2067 | -0,38261968  | 0,1387981 | -2,756664 | 0,0058394 | 0,0227414 | TTC7B    |
| ENSGALG00000015226 | 1410,5634 | -0,382624366 | 0,1475175 | -2,593756 | 0,0094934 | 0,0336858 | SPIDR    |
| ENSGALG00000008587 | 12026,073 | -0,382953864 | 0,1040771 | -3,679521 | 0,0002337 | 0,0015626 | NDUFAF1  |
| ENSGALG00000008493 | 1237,0726 | -0,38325533  | 0,1561662 | -2,45415  | 0,0141218 | 0,0461297 | METTL21A |
| ENSGALG00000005301 | 7189,628  | -0,383471192 | 0,1309696 | -2,92794  | 0,0034122 | 0,0146283 | CYB5R2   |
| ENSGALG00000027355 | 3798,5712 | -0,383473155 | 0,1422345 | -2,696064 | 0,0070164 | 0,0264622 | TPBG     |
| ENSGALG00000001596 | 12885,592 | -0,383722949 | 0,1090252 | -3,51958  | 0,0004322 | 0,0026566 | MLLT1    |
| ENSGALG00000000054 | 13558,561 | -0,383859531 | 0,1440809 | -2,664195 | 0,0077173 | 0,0286687 | OAT      |
| ENSGALG00000004839 | 5677,6109 | -0,383869776 | 0,1125796 | -3,409763 | 0,0006502 | 0,003732  | GPATCH1  |
| ENSGALG00000002346 | 7982,3843 | -0,383971209 | 0,1121749 | -3,422968 | 0,0006194 | 0,0035886 | CLSPN    |
| ENSGALG00000007556 | 1766,8481 | -0,384355829 | 0,1442884 | -2,663803 | 0,0077263 | 0,0286811 | ORAOV1   |
| ENSGALG00000016040 | 7227,3379 | -0,384424184 | 0,1139331 | -3,374123 | 0,0007405 | 0,0041657 | MORC3    |
| ENSGALG00000011881 | 17920,009 | -0,384788496 | 0,101237  | -3,800869 | 0,0001442 | 0,0010289 | CCNA2    |
| ENSGALG00000016751 | 19933,902 | -0,385163412 | 0,1317503 | -2,923435 | 0,0034619 | 0,0148127 | TMEM131  |
| ENSGALG00000017105 | 3524,6327 | -0,385190009 | 0,1190655 | -3,235111 | 0,001216  | 0,0062852 | RNF6     |
| ENSGALG00000015010 | 9588,3759 | -0,38521292  | 0,1153698 | -3,338939 | 0,000841  | 0,0046244 | NSG1     |
| ENSGALG00000010061 | 5963,3093 | -0,385385873 | 0,159264  | -2,419792 | 0,0155294 | 0,0497371 | LRBA     |
| ENSGALG00000008542 | 24254,362 | -0,385688801 | 0,137665  | -2,801647 | 0,0050842 | 0,0203416 | ADD3     |
| ENSGALG00000015040 | 4593,8104 | -0,38608617  | 0,1172115 | -3,293928 | 0,000988  | 0,0052792 | SLC16A10 |
| ENSGALG00000001876 | 1186,4565 | -0,386144808 | 0,1524506 | -2,532918 | 0,0113118 | 0,0387543 | RASA4    |
| ENSGALG00000013061 | 7957,2214 | -0,38617661  | 0,1127911 | -3,423821 | 0,0006175 | 0,0035805 | PAPD7    |
| ENSGALG00000011357 | 6554,7154 | -0,387039211 | 0,1110437 | -3,485467 | 0,0004913 | 0,0029557 | VEZT     |
| ENSGALG00000006259 | 19676,996 | -0,387217866 | 0,1021071 | -3,792272 | 0,0001493 | 0,0010619 | KIRREL   |
| ENSGALG00000027774 | 12094,125 | -0,387231267 | 0,1136139 | -3,40831  | 0,0006537 | 0,0037441 | ALMS1    |
| ENSGALG00000002143 | 8359,2157 | -0,387272727 | 0,1268467 | -3,053076 | 0,0022651 | 0,0104398 | ANKLE2   |
| ENSGALG00000008280 | 7969,0775 | -0,387606949 | 0,1111093 | -3,48903  | 0,0004848 | 0,002923  | PMPCB    |
| ENSGALG00000012724 | 10174,958 | -0,387874274 | 0,1052864 | -3,683992 | 0,0002296 | 0,001541  | PAK1IP1  |
| ENSGALG00000015247 | 7003,5436 | -0,387982807 | 0,1080781 | -3,589838 | 0,0003309 | 0,002117  | GPR161   |
| ENSGALG00000027262 | 21153,65  | -0,388074983 | 0,1013462 | -3,829203 | 0,0001286 | 0,0009315 | CAB39    |
| ENSGALG00000005575 | 18548,779 | -0,388395592 | 0,1080882 | -3,593321 | 0,0003265 | 0,0020938 | AKAP1    |
| ENSGALG00000010609 | 3709,2893 | -0,388677075 | 0,1243181 | -3,126472 | 0,0017692 | 0,0085114 | NDUFAF7  |
| ENSGALG00000005012 | 6065,171  | -0,388993034 | 0,1215819 | -3,199432 | 0,001377  | 0,006959  | ISY1     |
| ENSGALG00000005904 | 32126,543 | -0,389017981 | 0,1104816 | -3,521111 | 0,0004297 | 0,0026439 | TMED5    |
| ENSGALG00000011103 | 30281,636 | -0,389199345 | 0,1020702 | -3,813057 | 0,0001373 | 0,0009872 | PAPOLA   |
| ENSGALG00000007788 | 4541,3087 | -0,389226557 | 0,117185  | -3,321472 | 0,0008954 | 0,0048844 | ABCB7    |
| ENSGALG00000001073 | 7165,4084 | -0,389421011 | 0,147194  | -2,645631 | 0,0081539 | 0,0298497 | NR6A1    |
| ENSGALG00000003166 | 4550,9206 | -0,38962163  | 0,1147713 | -3,394765 | 0,0006869 | 0,0039178 | REXO4    |
| ENSGALG00000002129 | 6971,2134 | -0,390332447 | 0,1113848 | -3,504359 | 0,0004577 | 0,0027845 | WDR47    |
| ENSGALG00000027696 | 2856,8564 | -0,390616277 | 0,1467859 | -2,661129 | 0,0077879 | 0,0288524 |          |
| ENSGALG00000007485 | 13617,236 | -0,391583137 | 0,1247391 | -3,139217 | 0,001694  | 0,0082195 | TFRC     |
| ENSGALG00000008983 | 6819,4343 | -0,391807233 | 0,114877  | -3,410666 | 0,000648  | 0,0037213 | GNB4     |
| ENSGALG00000009364 | 15815,387 | -0,391850394 | 0,1069886 | -3,662544 | 0,0002497 | 0,0016558 | PRKCI    |
| ENSGALG00000015396 | 993,36818 | -0,391937266 | 0,1599566 | -2,450272 | 0,0142748 | 0,0464956 | CD200    |
| ENSGALG00000028035 | 5338,9185 | -0,391942986 | 0,1230917 | -3,184154 | 0,0014518 | 0,0072578 | FBXO22   |
| ENSGALG00000025858 | 3504,3476 | -0,392172869 | 0,1322344 | -2,96574  | 0,0030196 | 0,0132318 | LUZP1    |
| ENSGALG00000017064 | 15165,119 | -0,392266132 | 0,1075067 | -3,648759 | 0,0002635 | 0,001734  | RFC3     |
| ENSGALG00000013410 | 8555,6915 | -0,392331865 | 0,1073488 | -3,654738 | 0,0002574 | 0,0016999 | UBA3     |
| ENSGALG00000003277 | 6528,6806 | -0,393093094 | 0,1163756 | -3,377797 | 0,0007307 | 0,0041228 | SUZ12    |
| ENSGALG00000007312 | 1591,4187 | -0,393109181 | 0,1537105 | -2,557464 | 0,0105438 | 0,0367241 | GNPDA1   |
| ENSGALG00000002682 | 5643,0549 | -0,393160876 | 0,1228268 | -3,200938 | 0,0013698 | 0,0069331 | BRD3     |
| ENSGALG00000004481 | 5167,7274 | -0,39336646  | 0,121645  | -3,233724 | 0,0012219 | 0,0063086 | EDA      |
| ENSGALG00000015865 | 4560,3514 | -0,393610955 | 0,1160346 | -3,392187 | 0,0006934 | 0,0039501 | FAM46A   |
| ENSGALG00000009569 | 11508,232 | -0,393918558 | 0,1069286 | -3,683939 | 0,0002297 | 0,001541  | TLK1     |
| ENSGALG00000009201 | 11168,289 | -0,39393497  | 0,1118548 | -3,521842 | 0,0004286 | 0,0026399 | CCNF     |
| ENSGALG00000028133 | 7664,2653 | -0,394703045 | 0,1165319 | -3,387082 | 0,0007064 | 0,0040074 | UBE2V2   |
| ENSGALG00000028883 | 9007,8407 | -0,394818784 | 0,1358341 | -2,906626 | 0,0036535 | 0,0155154 | NOL11    |
| ENSGALG00000028898 | 2507,0991 | -0,395098922 | 0,1286111 | -3,072045 | 0,002126  | 0,0099434 | GLTPD1   |

|                     |           |              |           |           |           |           |              |
|---------------------|-----------|--------------|-----------|-----------|-----------|-----------|--------------|
| ENSGALG00000014166  | 1449,8688 | -0,395137478 | 0,1437153 | -2,749445 | 0,0059696 | 0,0231821 | TSPO         |
| ENSGALG00000016467  | 8711,5563 | -0,395365049 | 0,1194699 | -3,309327 | 0,0009352 | 0,0050615 | SMC6         |
| ENSGALG00000003043  | 3489,7523 | -0,395518744 | 0,1229266 | -3,217519 | 0,001293  | 0,0066184 | BBS2         |
| ENSGALG00000017024  | 1501,8199 | -0,395600818 | 0,1535883 | -2,575722 | 0,0100031 | 0,0351736 | NEK3         |
| ENSGALG00000008738  | 1562,619  | -0,395613631 | 0,1395655 | -2,83461  | 0,0045882 | 0,0186403 |              |
| ENSGALG00000002076  | 11878,124 | -0,395918706 | 0,1140373 | -3,471836 | 0,0005169 | 0,0030827 | DGCR8        |
| ENSGALG00000008521  | 16274,178 | -0,395949661 | 0,1276174 | -3,10263  | 0,0019181 | 0,0091151 | TP53BP1      |
| ENSGALG00000014688  | 9710,7864 | -0,396059354 | 0,1249828 | -3,16891  | 0,0015301 | 0,0075617 | ZYX          |
| ENSGALG00000003273  | 1825,9769 | -0,396166645 | 0,1597575 | -2,4798   | 0,0131456 | 0,0436637 | HSDL1        |
| ENSGALG00000004256  | 8236,2208 | -0,396589984 | 0,1140041 | -3,478736 | 0,0005038 | 0,003015  | DHRS3        |
| ENSGALG00000010643  | 4501,8566 | -0,396627508 | 0,117516  | -3,375094 | 0,0007379 | 0,004154  | ZYG11B       |
| ENSGALG00000012759  | 9679,7293 | -0,396656849 | 0,1130301 | -3,509303 | 0,0004493 | 0,0027403 | NUP37        |
| ENSGALG00000004435  | 2804,793  | -0,396797105 | 0,1243897 | -3,189952 | 0,001423  | 0,0071489 | RAB27A       |
| ENSGALG00000009608  | 5107,6787 | -0,396825966 | 0,1273293 | -3,116534 | 0,0018299 | 0,0087449 | UBR3         |
| ENSGALG00000009838  | 16688,775 | -0,397053502 | 0,1016373 | -3,906571 | 9,36E-05  | 0,0007093 | AQR          |
| ENSGALG00000009533  | 7127,7941 | -0,397081701 | 0,1281809 | -3,097822 | 0,0019495 | 0,0092417 | NMD3         |
| ENSGALG00000006563  | 2968,8404 | -0,397183147 | 0,1427397 | -2,78257  | 0,005393  | 0,0213616 | SEMA3D       |
| ENSGALG00000015435  | 3490,2323 | -0,397319834 | 0,1216986 | -3,264786 | 0,0010955 | 0,0057608 | DCAF6        |
| ENSGALG00000010886  | 2623,1957 | -0,397321501 | 0,1327902 | -2,992101 | 0,0027706 | 0,0123558 | PAQR3        |
| ENSGALG00000015215  | 6704,2917 | -0,397390834 | 0,1204862 | -3,298228 | 0,000973  | 0,0052112 | MAPRE2       |
| ENSGALG00000013776  | 3256,8373 | -0,397455529 | 0,1277422 | -3,111389 | 0,0018621 | 0,0088676 | CEP135       |
| ENSGALG00000002675  | 3557,3289 | -0,397531672 | 0,1252523 | -3,173848 | 0,0015043 | 0,0074478 | SCUBE3       |
| ENSGALG00000009322  | 5962,2024 | -0,397973054 | 0,1135762 | -3,504017 | 0,0004583 | 0,0027868 | NVL          |
| ENSGALG00000001576  | 13166,504 | -0,398019961 | 0,106825  | -3,725905 | 0,0001946 | 0,0013328 | HIRA         |
| ENSGALG00000003675  | 2269,9539 | -0,398220954 | 0,1307081 | -3,046644 | 0,0023141 | 0,0106334 | PRKAR1B      |
| ENSGALG00000010256  | 2730,229  | -0,398269176 | 0,1444457 | -2,757224 | 0,0058294 | 0,0227155 | TIPARP       |
| ENSGALG00000000838  | 3236,5634 | -0,398388838 | 0,1429731 | -2,786459 | 0,0053287 | 0,0211518 | THAP12       |
| ENSGALG00000008889  | 7462,9462 | -0,398667809 | 0,107895  | -3,694959 | 0,0002199 | 0,001483  | TTC14        |
| ENSGALG00000010674  | 9662,4596 | -0,399166032 | 0,1113474 | -3,58487  | 0,0003372 | 0,0021516 | DCTD         |
| ENSGALG00000011186  | 1570,9959 | -0,399261707 | 0,1516141 | -2,633408 | 0,0084533 | 0,0307484 | ERMARD       |
| ENSGALG00000006483  | 5623,947  | -0,399267586 | 0,1210637 | -3,297995 | 0,0009738 | 0,0052135 | AMOTL2       |
| ENSGALG00000004368  | 3768,914  | -0,39990946  | 0,1253746 | -3,189717 | 0,0014241 | 0,0071521 | GNA12        |
| ENSGALG00000001377  | 9703,5691 | -0,400093128 | 0,1073106 | -3,728364 | 0,0001927 | 0,0013239 | POLRMT       |
| ENSGALG000000023725 | 1256,3767 | -0,400126756 | 0,1588481 | -2,518927 | 0,0117713 | 0,0399966 | IER5         |
| ENSGALG000000020251 | 2658,2357 | -0,40015479  | 0,1247153 | -3,208547 | 0,0013341 | 0,0067774 | FNIP2        |
| ENSGALG00000007663  | 14617,833 | -0,400171791 | 0,1147124 | -3,488479 | 0,0004858 | 0,0029278 | KDM3B        |
| ENSGALG00000016437  | 3164,1402 | -0,40025509  | 0,1368097 | -2,925634 | 0,0034375 | 0,0147223 | TAF1B        |
| ENSGALG00000008289  | 17537,453 | -0,401142997 | 0,1117051 | -3,59109  | 0,0003293 | 0,0021088 | RBM19        |
| ENSGALG00000000332  | 20852,835 | -0,401294712 | 0,1053884 | -3,80777  | 0,0001402 | 0,0010059 | FTSJ3        |
| ENSGALG00000016747  | 15836,06  | -0,401466819 | 0,10405   | -3,858403 | 0,0001141 | 0,0008386 | UBE3A        |
| ENSGALG00000011542  | 3771,8431 | -0,401482328 | 0,1540301 | -2,606518 | 0,0091468 | 0,0326946 | METTL6       |
| ENSGALG00000001094  | 14665,623 | -0,40156915  | 0,1240977 | -3,235912 | 0,0012125 | 0,0062731 | ADGRD2       |
| ENSGALG00000011493  | 4936,2961 | -0,401631833 | 0,1189649 | -3,376053 | 0,0007353 | 0,0041422 | TMEM169      |
| ENSGALG00000010304  | 4399,9164 | -0,401743756 | 0,1198974 | -3,350729 | 0,000806  | 0,0044728 | MLH3         |
| ENSGALG00000001422  | 12037,379 | -0,402405365 | 0,1260368 | -3,192761 | 0,0014092 | 0,0070902 | RRP9         |
| ENSGALG00000005516  | 8167,2279 | -0,402406965 | 0,1079699 | -3,72703  | 0,0001937 | 0,0013282 | HEATR6       |
| ENSGALG00000010903  | 1862,2125 | -0,40247318  | 0,14557   | -2,764808 | 0,0056956 | 0,0222898 | RASGEF1B     |
| ENSGALG00000012138  | 29874,231 | -0,402996238 | 0,1040941 | -3,871462 | 0,0001082 | 0,0008023 | sept-07      |
| ENSGALG00000011379  | 3502,2993 | -0,403264726 | 0,1218523 | -3,309456 | 0,0009348 | 0,0050615 | SLC44A5      |
| ENSGALG00000004486  | 7663,2736 | -0,403537703 | 0,1189928 | -3,391278 | 0,0006957 | 0,0039614 | ZCCHC8       |
| ENSGALG00000011505  | 19437,736 | -0,403647787 | 0,1041549 | -3,875456 | 0,0001064 | 0,0007935 | MARK3        |
| ENSGALG00000007610  | 8753,2545 | -0,403710794 | 0,1080893 | -3,734976 | 0,0001877 | 0,0012942 | CDC23        |
| ENSGALG00000003219  | 2817,8802 | -0,403748967 | 0,1250219 | -3,229426 | 0,0012404 | 0,0063945 | RP11-77K12.7 |
| ENSGALG00000002602  | 3162,965  | -0,403772578 | 0,1577228 | -2,560015 | 0,0104668 | 0,036493  | CSMD2        |
| ENSGALG00000012919  | 4205,6363 | -0,40384181  | 0,1377531 | -2,931636 | 0,0033718 | 0,0144834 | YARS2        |
| ENSGALG00000015033  | 6515,5396 | -0,403855123 | 0,1645709 | -2,453988 | 0,0141282 | 0,0461393 | REV3L        |
| ENSGALG00000003033  | 4208,0329 | -0,4040823   | 0,1239451 | -3,260173 | 0,0011134 | 0,0058396 | STXBP4       |
| ENSGALG00000009887  | 7499,0415 | -0,404219345 | 0,1116137 | -3,621592 | 0,0002928 | 0,0019019 | DIEXF        |
| ENSGALG00000016070  | 5235,9258 | -0,404284672 | 0,1139162 | -3,548966 | 0,0003867 | 0,0024088 | WRB          |
| ENSGALG00000028679  | 2739,4279 | -0,404433944 | 0,1560396 | -2,591867 | 0,0095457 | 0,0338272 | RRP8         |
| ENSGALG00000005558  | 18603,537 | -0,404537586 | 0,1021007 | -3,962142 | 7,43E-05  | 0,0005792 | TBL3         |
| ENSGALG00000003358  | 9790,289  | -0,404595333 | 0,1105122 | -3,661092 | 0,0002511 | 0,0016639 | UBIAD1       |

|                     |           |              |           |           |           |           |         |
|---------------------|-----------|--------------|-----------|-----------|-----------|-----------|---------|
| ENSGALG00000010428  | 7926,1945 | -0,404704607 | 0,1082049 | -3,74017  | 0,0001839 | 0,0012722 | FAM98A  |
| ENSGALG00000012509  | 6088,1178 | -0,40489721  | 0,1172775 | -3,452472 | 0,0005555 | 0,0032739 | ARL5A   |
| ENSGALG00000016034  | 11941,122 | -0,4051791   | 0,11639   | -3,481218 | 0,0004991 | 0,0029977 | ATRN    |
| ENSGALG00000016397  | 10814,151 | -0,405217096 | 0,1464803 | -2,766359 | 0,0056686 | 0,0222137 | SOX11   |
| ENSGALG00000009015  | 5602,2699 | -0,40522305  | 0,1351963 | -2,997294 | 0,0027239 | 0,0121752 | PIGK    |
| ENSGALG00000011405  | 5639,0186 | -0,405273633 | 0,1171817 | -3,458507 | 0,0005432 | 0,0032154 | SLC4A7  |
| ENSGALG00000002042  | 9110,0202 | -0,405517273 | 0,1100944 | -3,683359 | 0,0002302 | 0,001543  | KNOP1   |
| ENSGALG00000015313  | 1727,1874 | -0,405609451 | 0,1673222 | -2,424122 | 0,0153455 | 0,049264  | PDSS2   |
| ENSGALG00000011118  | 5098,9857 | -0,405615226 | 0,1135418 | -3,572385 | 0,0003537 | 0,0022401 | MIER1   |
| ENSGALG00000012756  | 1600,2653 | -0,405783919 | 0,1444512 | -2,809142 | 0,0049674 | 0,0199796 | PARPBP  |
| ENSGALG00000004300  | 11426,337 | -0,405827457 | 0,1082534 | -3,748866 | 0,0001776 | 0,0012377 | PTDSS2  |
| ENSGALG00000002107  | 25522,201 | -0,406162719 | 0,1018979 | -3,985977 | 6,72E-05  | 0,0005304 | RANBP1  |
| ENSGALG00000011571  | 3230,4791 | -0,406488263 | 0,1210977 | -3,356697 | 0,0007888 | 0,0044014 | AGPAT4  |
| ENSGALG00000015439  | 3241,7503 | -0,406514431 | 0,1539648 | -2,640308 | 0,0082831 | 0,0302474 | SLC44A1 |
| ENSGALG00000009800  | 11257,087 | -0,406824322 | 0,137832  | -2,951596 | 0,0031614 | 0,0137382 | SETD7   |
| ENSGALG00000014404  | 9644,7108 | -0,407214942 | 0,1124218 | -3,622207 | 0,0002921 | 0,0018983 | GPR125  |
| ENSGALG00000004001  | 29564,347 | -0,407260268 | 0,1220375 | -3,337173 | 0,0008464 | 0,0046501 | LARP1   |
| ENSGALG00000014165  | 2563,4692 | -0,407468645 | 0,1414422 | -2,880813 | 0,0039665 | 0,0165833 | MCAT    |
| ENSGALG00000000275  | 5245,7551 | -0,407767805 | 0,1196134 | -3,409049 | 0,0006519 | 0,0037377 | KCTD9   |
| ENSGALG00000013661  | 4102,8132 | -0,40778269  | 0,1293022 | -3,153718 | 0,001612  | 0,007895  | MICU3   |
| ENSGALG00000009534  | 2852,2534 | -0,408065762 | 0,1282621 | -3,1815   | 0,0014651 | 0,0072963 | PLEKHA1 |
| ENSGALG00000013715  | 2414,831  | -0,408079285 | 0,1364191 | -2,991364 | 0,0027773 | 0,0123776 | DLC1    |
| ENSGALG00000003143  | 15625,053 | -0,408123735 | 0,1067545 | -3,823012 | 0,0001318 | 0,0009527 | ZC3H7A  |
| ENSGALG00000001616  | 13431,828 | -0,408530697 | 0,1073575 | -3,805328 | 0,0001416 | 0,0010148 | CDC45   |
| ENSGALG00000003995  | 3806,3629 | -0,408610387 | 0,1221472 | -3,34523  | 0,0008221 | 0,0045354 | ERAL1   |
| ENSGALG000000028536 | 1522,6438 | -0,40868801  | 0,1548439 | -2,639355 | 0,0083064 | 0,0303114 | MPEG1   |
| ENSGALG00000011100  | 3743,986  | -0,408960809 | 0,1243724 | -3,288197 | 0,0010083 | 0,0053689 | HIBADH  |
| ENSGALG00000008523  | 12531,511 | -0,409027447 | 0,1050057 | -3,895289 | 9,81E-05  | 0,0007378 | XPNPEP1 |
| ENSGALG00000012607  | 5903,9235 | -0,409282973 | 0,1276687 | -3,20582  | 0,0013468 | 0,0068343 | ZCCHC6  |
| ENSGALG00000009483  | 9325,7747 | -0,409303762 | 0,1092985 | -3,744826 | 0,0001805 | 0,0012537 | MARK1   |
| ENSGALG00000008658  | 2008,7076 | -0,409694565 | 0,1367947 | -2,994959 | 0,0027448 | 0,0122607 | ZNHIT6  |
| ENSGALG00000013858  | 2841,1323 | -0,410414198 | 0,1233001 | -3,328579 | 0,0008729 | 0,0047767 | CEP76   |
| ENSGALG00000002673  | 4173,3236 | -0,41052388  | 0,114577  | -3,582951 | 0,0003397 | 0,0021645 | GRPEL2  |
| ENSGALG00000016345  | 4179,8127 | -0,410542245 | 0,1255035 | -3,271162 | 0,0010711 | 0,0056609 | KLHL15  |
| ENSGALG00000006404  | 23302,915 | -0,411265326 | 0,1022948 | -4,020395 | 5,81E-05  | 0,0004686 | DDX46   |
| ENSGALG00000002830  | 2218,8919 | -0,411355669 | 0,1470401 | -2,797575 | 0,0051488 | 0,0205453 | NUDT3   |
| ENSGALG00000011662  | 25762,115 | -0,412100057 | 0,1171723 | -3,517043 | 0,0004364 | 0,0026703 | NUP205  |
| ENSGALG00000006157  | 6346,9334 | -0,412112134 | 0,1105255 | -3,728661 | 0,0001925 | 0,0013231 | DDX26B  |
| ENSGALG00000015944  | 3056,9164 | -0,412472548 | 0,1405652 | -2,934387 | 0,0033421 | 0,0143722 | RIMS1   |
| ENSGALG00000000780  | 20148,91  | -0,413093901 | 0,1091845 | -3,783448 | 0,0001547 | 0,0010956 | SMPD3   |
| ENSGALG00000010734  | 12330,712 | -0,413140268 | 0,115155  | -3,587689 | 0,0003336 | 0,0021305 | PPP4R3A |
| ENSGALG00000027373  | 11590,467 | -0,413207621 | 0,1275875 | -3,238621 | 0,0012011 | 0,0062229 |         |
| ENSGALG00000014811  | 9624,081  | -0,413279775 | 0,1068315 | -3,868519 | 0,0001095 | 0,0008103 | SMCHD1  |
| ENSGALG00000000860  | 3991,9401 | -0,413426982 | 0,141168  | -2,928617 | 0,0034047 | 0,0146048 | SLC7A6  |
| ENSGALG00000014464  | 1467,51   | -0,413666995 | 0,1677373 | -2,466159 | 0,0136571 | 0,0449024 | MTR     |
| ENSGALG00000027864  | 1064,9642 | -0,413669777 | 0,1682884 | -2,458101 | 0,0139674 | 0,045702  | NFKBIA  |
| ENSGALG00000009300  | 6311,4725 | -0,413699825 | 0,1174909 | -3,521122 | 0,0004297 | 0,0026439 | NUMB    |
| ENSGALG00000014978  | 5258,7361 | -0,41400107  | 0,1181716 | -3,503389 | 0,0004594 | 0,0027915 | IQGAP2  |
| ENSGALG00000004947  | 6549,1555 | -0,414737624 | 0,1229203 | -3,374037 | 0,0007407 | 0,0041657 | POLR3A  |
| ENSGALG00000001613  | 28424,625 | -0,414922322 | 0,1050352 | -3,950318 | 7,80E-05  | 0,0006041 | GNL3    |
| ENSGALG00000013943  | 3049,8006 | -0,414996341 | 0,1265367 | -3,279652 | 0,0010394 | 0,0055126 | FIP1L1  |
| ENSGALG00000012241  | 2635,2581 | -0,415005332 | 0,1298425 | -3,196222 | 0,0013924 | 0,0070187 | KLHDC1  |
| ENSGALG00000014708  | 1768,2325 | -0,415209722 | 0,1395692 | -2,974938 | 0,0029305 | 0,0129247 | GSTK1   |
| ENSGALG00000027593  | 7745,809  | -0,415214085 | 0,1233358 | -3,366535 | 0,0007612 | 0,0042684 | ZNF292  |
| ENSGALG00000000800  | 3898,7504 | -0,415275292 | 0,1200235 | -3,459951 | 0,0005403 | 0,003201  | PRMT7   |
| ENSGALG00000027666  | 1353,3857 | -0,415292257 | 0,1696173 | -2,448407 | 0,014349  | 0,0467036 | TMEM80  |
| ENSGALG00000012608  | 2590,1311 | -0,415354931 | 0,1398222 | -2,970593 | 0,0029723 | 0,0130666 | DAPK1   |
| ENSGALG00000009634  | 10679,835 | -0,415471196 | 0,1072605 | -3,873478 | 0,0001073 | 0,0007966 | GFM1    |
| ENSGALG00000012030  | 9331,9586 | -0,415761326 | 0,140767  | -2,953543 | 0,0031415 | 0,013665  | QSER1   |
| ENSGALG00000016972  | 5736,7284 | -0,415815188 | 0,1184924 | -3,509213 | 0,0004494 | 0,0027403 | NUFIP1  |
| ENSGALG00000026470  | 13532,223 | -0,41655555  | 0,1120502 | -3,71758  | 0,0002011 | 0,0013699 | BOD1L1  |
| ENSGALG00000010996  | 3758,0298 | -0,416979888 | 0,1506983 | -2,766985 | 0,0056577 | 0,0221925 | IRF2BP2 |

|                    |           |              |           |           |           |           |              |
|--------------------|-----------|--------------|-----------|-----------|-----------|-----------|--------------|
| ENSGALG00000003737 | 3492,3176 | -0,417242803 | 0,1329577 | -3,138163 | 0,0017001 | 0,0082461 | TOX3         |
| ENSGALG00000006818 | 7817,9637 | -0,417614565 | 0,1586281 | -2,632664 | 0,0084718 | 0,0307911 | KMT2A        |
| ENSGALG00000014386 | 4214,1295 | -0,417751127 | 0,1215158 | -3,437832 | 0,0005864 | 0,0034221 | SEPSECS      |
| ENSGALG00000014013 | 11695,533 | -0,418753457 | 0,1054585 | -3,970791 | 7,16E-05  | 0,0005625 | ARHGAP18     |
| ENSGALG00000015132 | 49891,397 | -0,418923213 | 0,1007384 | -4,158527 | 3,20E-05  | 0,000281  | CDH2         |
| ENSGALG00000004121 | 4190,9905 | -0,419252057 | 0,1222891 | -3,428369 | 0,0006072 | 0,003533  | LPAR4        |
| ENSGALG00000013681 | 3809,2674 | -0,419314087 | 0,1641248 | -2,55485  | 0,0106234 | 0,0369255 | ZNF407       |
| ENSGALG00000009961 | 27537,675 | -0,419402034 | 0,1063815 | -3,942434 | 8,07E-05  | 0,0006229 | ABCE1        |
| ENSGALG00000010201 | 4830,0616 | -0,41947829  | 0,1360243 | -3,083848 | 0,0020434 | 0,0096134 | ABHD18       |
| ENSGALG00000006526 | 6573,3308 | -0,419710882 | 0,1536968 | -2,730772 | 0,0063186 | 0,024288  | PLXNB1       |
| ENSGALG00000004716 | 1607,3564 | -0,41985683  | 0,1470278 | -2,855629 | 0,0042952 | 0,0176945 | ZC4H2        |
| ENSGALG00000019228 | 2351,715  | -0,419863222 | 0,1356378 | -3,095474 | 0,001965  | 0,0093023 | SFT2D2       |
| ENSGALG00000007227 | 17010,789 | -0,420130207 | 0,125082  | -3,358839 | 0,0007827 | 0,0043764 | MSI1         |
| ENSGALG00000000975 | 4091,6956 | -0,420207875 | 0,1199453 | -3,50333  | 0,0004595 | 0,0027915 |              |
| ENSGALG00000003985 | 6692,4044 | -0,42022626  | 0,1152659 | -3,645711 | 0,0002667 | 0,0017505 | TARSL2       |
| ENSGALG00000007736 | 8209,2388 | -0,420323444 | 0,1102306 | -3,813127 | 0,0001372 | 0,0009872 | ZWILCH       |
| ENSGALG00000014827 | 2639,1918 | -0,420567115 | 0,1657257 | -2,537731 | 0,0111574 | 0,0383605 | KIAA0408     |
| ENSGALG00000012188 | 1607,0265 | -0,420636341 | 0,1572383 | -2,675152 | 0,0074695 | 0,0278853 | BBS9         |
| ENSGALG00000008989 | 27837,925 | -0,420708851 | 0,1092049 | -3,852471 | 0,0001169 | 0,0008555 | WDR43        |
| ENSGALG00000017119 | 1864,3003 | -0,420708881 | 0,1365688 | -3,080563 | 0,0020661 | 0,0096988 | TNFRSF19     |
| ENSGALG00000023650 | 764,17678 | -0,420788842 | 0,1697354 | -2,479087 | 0,0131719 | 0,0437404 |              |
| ENSGALG00000010630 | 14099,6   | -0,420914921 | 0,1126811 | -3,735454 | 0,0001874 | 0,0012926 | AHCTF1       |
| ENSGALG00000004310 | 3386,8687 | -0,4211147   | 0,1211839 | -3,475005 | 0,0005108 | 0,0030492 | TTYH3        |
| ENSGALG00000010671 | 83381,23  | -0,421121888 | 0,1031007 | -4,084569 | 4,42E-05  | 0,0003679 | HNRNPU       |
| ENSGALG00000008466 | 2872,7321 | -0,421406429 | 0,1332906 | -3,16156  | 0,0015693 | 0,0077355 | FAM117B      |
| ENSGALG00000027311 | 10812,972 | -0,421551178 | 0,1501476 | -2,807579 | 0,0049915 | 0,0200413 | NGFR         |
| ENSGALG00000014937 | 3129,4872 | -0,421603891 | 0,1255788 | -3,357285 | 0,0007871 | 0,0043945 | KPNA5        |
| ENSGALG00000018803 | 3405,6338 | -0,421885923 | 0,1263968 | -3,33779  | 0,0008445 | 0,0046417 | TMEM198      |
| ENSGALG00000011965 | 3023,1564 | -0,422009879 | 0,1389961 | -3,036128 | 0,0023964 | 0,0109339 | ZC3H7B       |
| ENSGALG00000015692 | 1953,5689 | -0,422243248 | 0,1336531 | -3,159247 | 0,0015818 | 0,0077775 | POLN         |
| ENSGALG00000012579 | 13996,553 | -0,422359298 | 0,1452155 | -2,908501 | 0,0036317 | 0,0154323 | BAZ2B        |
| ENSGALG00000013607 | 7250,9812 | -0,422561681 | 0,11201   | -3,772535 | 0,0001616 | 0,0011382 | FBXO5        |
| ENSGALG00000016276 | 1028,3831 | -0,422833677 | 0,1624303 | -2,60317  | 0,0092366 | 0,0329724 | KHDRBS2      |
| ENSGALG00000015589 | 4158,3548 | -0,422922749 | 0,1597028 | -2,648186 | 0,0080925 | 0,029674  | MSH3         |
| ENSGALG00000006002 | 2601,7776 | -0,422978689 | 0,1302324 | -3,247876 | 0,0011627 | 0,0060536 | WHDC1        |
| ENSGALG00000006652 | 5529,9226 | -0,423060365 | 0,1599744 | -2,644551 | 0,0081799 | 0,0299301 | DIP2C        |
| ENSGALG00000027334 | 5378,2134 | -0,423190484 | 0,1394998 | -3,033628 | 0,0024163 | 0,0110138 |              |
| ENSGALG00000002763 | 8455,8856 | -0,423193935 | 0,11583   | -3,653579 | 0,0002586 | 0,0017067 | FRZB         |
| ENSGALG00000000962 | 2645,4224 | -0,423212428 | 0,1264405 | -3,347126 | 0,0008165 | 0,00451   | PUS3         |
| ENSGALG00000008708 | 9031,5502 | -0,423296325 | 0,1063024 | -3,982003 | 6,83E-05  | 0,0005384 | ESF1         |
| ENSGALG00000004297 | 1889,6269 | -0,42334794  | 0,1444708 | -2,930335 | 0,003386  | 0,014538  | DNAH1        |
| ENSGALG00000014568 | 6675,2521 | -0,423460012 | 0,1137337 | -3,723259 | 0,0001967 | 0,0013449 | RP3-461F17.3 |
| ENSGALG00000012216 | 1240,2281 | -0,423752018 | 0,1593085 | -2,659946 | 0,0078153 | 0,0289303 | BMPR1B       |
| ENSGALG00000001850 | 22801,494 | -0,423798382 | 0,1070003 | -3,960721 | 7,47E-05  | 0,0005817 | RARS         |
| ENSGALG00000016701 | 2038,8685 | -0,423807866 | 0,1319527 | -3,211817 | 0,001319  | 0,0067183 |              |
| ENSGALG00000003288 | 22428,698 | -0,423843105 | 0,1239826 | -3,418569 | 0,0006295 | 0,0036317 | TARS         |
| ENSGALG00000009177 | 7539,3588 | -0,423896895 | 0,110067  | -3,851261 | 0,0001175 | 0,0008592 | FMR1         |
| ENSGALG00000012852 | 33011,495 | -0,42431457  | 0,1189985 | -3,565714 | 0,0003629 | 0,0022862 | MKRN1        |
| ENSGALG00000002288 | 13379,292 | -0,424413539 | 0,1057585 | -4,013044 | 5,99E-05  | 0,0004809 | LIG3         |
| ENSGALG00000000644 | 5332,9382 | -0,424448701 | 0,1720142 | -2,467522 | 0,0136052 | 0,0448185 | NFASC        |
| ENSGALG00000011177 | 6032,2306 | -0,424449663 | 0,1147226 | -3,699791 | 0,0002158 | 0,0014601 | CEP290       |
| ENSGALG00000005945 | 41976,029 | -0,425016747 | 0,1048948 | -4,051839 | 5,08E-05  | 0,0004173 | CANX         |
| ENSGALG00000002119 | 6930,5852 | -0,425364527 | 0,1209038 | -3,518206 | 0,0004345 | 0,0026634 | C16orf62     |
| ENSGALG00000000033 | 3918,6949 | -0,425866952 | 0,1266041 | -3,363768 | 0,0007689 | 0,0043061 | NFU1         |
| ENSGALG00000004181 | 1761,4875 | -0,425938272 | 0,1375166 | -3,09736  | 0,0019525 | 0,0092529 | GAA          |
| ENSGALG00000016911 | 5511,4642 | -0,426013919 | 0,1155064 | -3,688227 | 0,0002258 | 0,0015183 | RNF219       |
| ENSGALG00000001229 | 3132,3073 | -0,426291988 | 0,1628978 | -2,616929 | 0,0088725 | 0,0319489 | SKI          |
| ENSGALG00000005205 | 5076,6373 | -0,426364463 | 0,1335815 | -3,191793 | 0,0014139 | 0,0071088 | RNFT1        |
| ENSGALG00000016955 | 4576,7081 | -0,426960619 | 0,1306354 | -3,268337 | 0,0010818 | 0,0057067 | VWA8         |
| ENSGALG00000008616 | 22133,522 | -0,427012968 | 0,114208  | -3,738907 | 0,0001848 | 0,0012773 | GTF2H4       |
| ENSGALG00000001181 | 1351,4114 | -0,427049071 | 0,1574822 | -2,711729 | 0,0066933 | 0,0255122 | KCNJ5        |
| ENSGALG00000004104 | 16560,152 | -0,427862285 | 0,1288312 | -3,321108 | 0,0008966 | 0,0048849 | INTS1        |

|                     |           |              |           |           |           |           |           |
|---------------------|-----------|--------------|-----------|-----------|-----------|-----------|-----------|
| ENSGALG00000002262  | 28425,435 | -0,428265663 | 0,1046681 | -4,091655 | 4,28E-05  | 0,0003598 | ETF1      |
| ENSGALG00000009145  | 1321,8829 | -0,428291708 | 0,1635071 | -2,619407 | 0,0088083 | 0,0317766 | STARD9    |
| ENSGALG000000012068 | 1109,9265 | -0,428298706 | 0,1525081 | -2,808367 | 0,0049793 | 0,0200099 | ZGRF1     |
| ENSGALG000000005164 | 1906,2497 | -0,428309171 | 0,1642287 | -2,608005 | 0,0091072 | 0,0325699 | MTG2      |
| ENSGALG000000004776 | 7278,2903 | -0,428490556 | 0,1147583 | -3,733852 | 0,0001886 | 0,0012986 | AP4E1     |
| ENSGALG000000012227 | 10485,474 | -0,428492425 | 0,1091678 | -3,92508  | 8,67E-05  | 0,000665  | TSPAN5    |
| ENSGALG000000017111 | 14958,655 | -0,428517877 | 0,1112294 | -3,852559 | 0,0001169 | 0,0008555 | NUP58     |
| ENSGALG000000008844 | 4547,7203 | -0,428880605 | 0,1351184 | -3,17411  | 0,001503  | 0,0074438 | SLC31A1   |
| ENSGALG000000023571 | 6639,2137 | -0,428973189 | 0,1232423 | -3,480731 | 0,0005    | 0,0030018 | TRIM59    |
| ENSGALG000000014953 | 10323,626 | -0,429472364 | 0,1343816 | -3,195916 | 0,0013939 | 0,0070213 | RWDD1     |
| ENSGALG000000016454 | 3850,1908 | -0,429504414 | 0,1220362 | -3,519484 | 0,0004324 | 0,0026566 | E2F6      |
| ENSGALG000000000346 | 4943,5232 | -0,429865287 | 0,1169676 | -3,675082 | 0,0002378 | 0,0015854 | ZNF606    |
| ENSGALG000000004133 | 28687,584 | -0,430003398 | 0,1149324 | -3,741359 | 0,000183  | 0,0012682 | SRSF10    |
| ENSGALG000000006730 | 17262,845 | -0,430049755 | 0,1029557 | -4,177038 | 2,95E-05  | 0,0002614 | PM5       |
| ENSGALG000000027835 | 5051,5612 | -0,430117051 | 0,1151335 | -3,735813 | 0,0001871 | 0,0012918 | PCBD1     |
| ENSGALG000000001501 | 5273,6643 | -0,430190725 | 0,1139513 | -3,775216 | 0,0001599 | 0,0011272 | MAPK1     |
| ENSGALG000000006500 | 13286,475 | -0,430344251 | 0,1186807 | -3,626068 | 0,0002878 | 0,0018755 | NDE1      |
| ENSGALG000000004986 | 14224,048 | -0,430376609 | 0,1189456 | -3,618265 | 0,0002966 | 0,0019238 | CERCAM    |
| ENSGALG000000004756 | 2781,9182 | -0,43117271  | 0,1246958 | -3,457796 | 0,0005446 | 0,0032218 | CEP89     |
| ENSGALG000000015184 | 7792,5962 | -0,431383947 | 0,1228874 | -3,510399 | 0,0004474 | 0,0027311 | TLE4      |
| ENSGALG000000007705 | 251805,66 | -0,431935045 | 0,0988918 | -4,367752 | 1,26E-05  | 0,0001257 | NCL       |
| ENSGALG000000011555 | 11516,332 | -0,431962973 | 0,1142249 | -3,781689 | 0,0001558 | 0,0011017 | QKI       |
| ENSGALG000000014222 | 26624,515 | -0,431998929 | 0,0998402 | -4,326904 | 1,51E-05  | 0,0001475 | NUP50     |
| ENSGALG000000011013 | 3992,5007 | -0,43257266  | 0,1184225 | -3,65279  | 0,0002594 | 0,0017112 | PCNX2     |
| ENSGALG000000015635 | 5954,0554 | -0,432598021 | 0,1516977 | -2,851712 | 0,0043485 | 0,0178433 | HTT       |
| ENSGALG000000008413 | 12232,739 | -0,432788919 | 0,1151054 | -3,759937 | 0,00017   | 0,0011928 | PPP4R1    |
| ENSGALG000000007481 | 6576,2725 | -0,43296248  | 0,1091555 | -3,966473 | 7,29E-05  | 0,0005708 | HACD3     |
| ENSGALG000000006378 | 6236,1912 | -0,43312035  | 0,1311772 | -3,301795 | 0,0009607 | 0,0051719 | LIPA      |
| ENSGALG000000013920 | 7232,4329 | -0,433479079 | 0,1210408 | -3,581264 | 0,0003419 | 0,0021744 | SUV39H2   |
| ENSGALG000000002877 | 3840,7613 | -0,433897954 | 0,1361261 | -3,187471 | 0,0014352 | 0,0071946 | LRRC45    |
| ENSGALG000000011548 | 3329,6306 | -0,434202614 | 0,128113  | -3,389215 | 0,0007009 | 0,003983  | PPP1R13B  |
| ENSGALG000000016279 | 1166,2207 | -0,434455337 | 0,1634837 | -2,657485 | 0,0078726 | 0,029087  | RAB23     |
| ENSGALG000000010976 | 5423,3364 | -0,434636867 | 0,1246154 | -3,487825 | 0,000487  | 0,0029336 | CCDC126   |
| ENSGALG000000009930 | 17651,917 | -0,434701609 | 0,1010801 | -4,300564 | 1,70E-05  | 0,000163  | STRN3     |
| ENSGALG000000006221 | 21172,656 | -0,434757063 | 0,1020087 | -4,261961 | 2,03E-05  | 0,0001895 | KIF1A     |
| ENSGALG000000028462 | 7479,587  | -0,434862527 | 0,1269541 | -3,425353 | 0,000614  | 0,0035679 | USP36     |
| ENSGALG000000008355 | 3052,8201 | -0,434887931 | 0,1335972 | -3,255217 | 0,0011331 | 0,0059333 | CASP8     |
| ENSGALG000000011543 | 9465,1404 | -0,435034048 | 0,1235278 | -3,521751 | 0,0004287 | 0,0026399 | SDAD1     |
| ENSGALG000000009519 | 11233,674 | -0,43521067  | 0,1059425 | -4,107988 | 3,99E-05  | 0,0003401 | ARG2      |
| ENSGALG000000009598 | 50606,56  | -0,435652779 | 0,1207717 | -3,607242 | 0,0003095 | 0,0019954 | EPRS      |
| ENSGALG000000006409 | 11343,942 | -0,436770571 | 0,1258794 | -3,469755 | 0,0005209 | 0,0031026 | PODXL     |
| ENSGALG000000028675 | 1287,5833 | -0,436847257 | 0,1749597 | -2,496845 | 0,0125304 | 0,0420822 |           |
| ENSGALG000000001717 | 40955,931 | -0,437024576 | 0,1153453 | -3,788837 | 0,0001514 | 0,0010755 | SLC16A1   |
| ENSGALG000000012680 | 2735,4526 | -0,437301833 | 0,1231056 | -3,552249 | 0,000382  | 0,0023844 | E2F3      |
| ENSGALG000000026093 | 981,75895 | -0,437495765 | 0,1708286 | -2,561021 | 0,0104365 | 0,0364061 | PTPRN     |
| ENSGALG000000011475 | 4517,3627 | -0,437819648 | 0,1241287 | -3,527143 | 0,0004201 | 0,0025938 | SMARCA1   |
| ENSGALG000000014375 | 10299,481 | -0,437825336 | 0,1079876 | -4,054405 | 5,03E-05  | 0,0004135 |           |
| ENSGALG000000017038 | 6592,4492 | -0,437833021 | 0,1366122 | -3,204934 | 0,0013509 | 0,0068503 | PROSER1   |
| ENSGALG000000012642 | 14397,962 | -0,437930988 | 0,1176937 | -3,720938 | 0,0001985 | 0,0013557 | RIC8B     |
| ENSGALG000000008796 | 7379,0553 | -0,438293488 | 0,1157441 | -3,786746 | 0,0001526 | 0,0010829 | RPF1      |
| ENSGALG000000007999 | 6686,6947 | -0,438325223 | 0,1112507 | -3,939978 | 8,15E-05  | 0,0006287 | MRPS7     |
| ENSGALG000000009448 | 19270,632 | -0,43880669  | 0,1070346 | -4,099673 | 4,14E-05  | 0,0003505 | IFRD1     |
| ENSGALG000000008163 | 17633,406 | -0,439350797 | 0,1262915 | -3,478863 | 0,0005035 | 0,0030149 | PSME4     |
| ENSGALG000000004522 | 17438,777 | -0,439397212 | 0,1129665 | -3,889624 | 0,0001004 | 0,0007527 |           |
| ENSGALG000000005854 | 8969,9116 | -0,439557852 | 0,1134785 | -3,87349  | 0,0001073 | 0,0007966 | CLUH      |
| ENSGALG000000014870 | 12682,587 | -0,439767118 | 0,1169979 | -3,75876  | 0,0001708 | 0,0011965 | HSF2      |
| ENSGALG000000009731 | 11305,313 | -0,439893222 | 0,106114  | -4,145476 | 3,39E-05  | 0,000295  | ARHGAP11A |
| ENSGALG000000006427 | 15012,164 | -0,439960428 | 0,10348   | -4,251647 | 2,12E-05  | 0,0001975 | CARS      |
| ENSGALG000000012497 | 3402,6563 | -0,440007974 | 0,1212931 | -3,627643 | 0,000286  | 0,001865  | SLC12A7   |
| ENSGALG000000022802 | 18215,83  | -0,44018485  | 0,113024  | -3,894614 | 9,84E-05  | 0,0007387 | PWP2      |
| ENSGALG000000000430 | 10996,849 | -0,440297246 | 0,1104513 | -3,986348 | 6,71E-05  | 0,0005299 | SPPL2B    |
| ENSGALG000000007145 | 45254,09  | -0,440432711 | 0,0991199 | -4,443434 | 8,85E-06  | 9,27E-05  | ITGB1     |

|                     |           |              |           |           |           |           |          |
|---------------------|-----------|--------------|-----------|-----------|-----------|-----------|----------|
| ENSGALG00000002732  | 1764,9109 | -0,440734535 | 0,1504889 | -2,928684 | 0,003404  | 0,0146048 | AKAP7    |
| ENSGALG00000003071  | 6465,8929 | -0,441229907 | 0,1183654 | -3,727693 | 0,0001932 | 0,0013256 | OGFOD1   |
| ENSGALG000000015049 | 15802,948 | -0,441268065 | 0,1109947 | -3,975577 | 7,02E-05  | 0,0005529 | AMD1     |
| ENSGALG00000008988  | 11231,556 | -0,442984401 | 0,1126159 | -3,933587 | 8,37E-05  | 0,0006437 | ZZZ3     |
| ENSGALG00000006403  | 20700,703 | -0,442987653 | 0,1077974 | -4,109445 | 3,97E-05  | 0,0003388 | MESDC2   |
| ENSGALG000000010957 | 23588,305 | -0,443064247 | 0,1020626 | -4,341102 | 1,42E-05  | 0,0001402 | USP1     |
| ENSGALG00000004820  | 1103,092  | -0,443483479 | 0,1622612 | -2,733145 | 0,0062733 | 0,0241546 | FAM57A   |
| ENSGALG000000020879 | 1971,7439 | -0,443502872 | 0,137058  | -3,235877 | 0,0012127 | 0,0062731 | SLC30A7  |
| ENSGALG000000012696 | 9654,978  | -0,443665071 | 0,1168806 | -3,795883 | 0,0001471 | 0,0010476 | RANBP9   |
| ENSGALG000000012000 | 7157,9161 | -0,444031788 | 0,1096112 | -4,05097  | 5,10E-05  | 0,0004182 | METTTL14 |
| ENSGALG00000005206  | 7037,81   | -0,444288079 | 0,1130121 | -3,931331 | 8,45E-05  | 0,0006489 | ACSL3    |
| ENSGALG00000003861  | 8032,1428 | -0,444434747 | 0,1081924 | -4,107819 | 3,99E-05  | 0,0003401 | HERC4    |
| ENSGALG00000005241  | 3696,959  | -0,444802963 | 0,1260848 | -3,527809 | 0,000419  | 0,0025884 | DYNC1LI2 |
| ENSGALG000000029011 | 22651,885 | -0,444941401 | 0,1003035 | -4,435953 | 9,17E-06  | 9,53E-05  | SLC35F1  |
| ENSGALG000000026971 | 4341,3764 | -0,445130127 | 0,1193093 | -3,730892 | 0,0001908 | 0,0013127 | RRAGD    |
| ENSGALG000000026753 | 1244,1641 | -0,445460857 | 0,1753388 | -2,540573 | 0,0110671 | 0,0381272 | FSBP     |
| ENSGALG00000007704  | 19378,595 | -0,445645488 | 0,1426064 | -3,125003 | 0,001778  | 0,008545  | NPM3     |
| ENSGALG000000010786 | 1210,4793 | -0,44600197  | 0,1746834 | -2,553203 | 0,0106737 | 0,0370627 | DGKB     |
| ENSGALG00000003400  | 9822,1857 | -0,446090625 | 0,1073373 | -4,155972 | 3,24E-05  | 0,0002836 | AIMP2    |
| ENSGALG00000009020  | 9304,4549 | -0,446477137 | 0,1140153 | -3,91594  | 9,01E-05  | 0,0006861 | JAG1     |
| ENSGALG00000000619  | 1429,9309 | -0,446602215 | 0,1730494 | -2,580779 | 0,0098578 | 0,0347614 | ANGPTL4  |
| ENSGALG000000013131 | 1864,5844 | -0,447051346 | 0,1333424 | -3,352657 | 0,0008004 | 0,0044479 | C18orf21 |
| ENSGALG00000002536  | 10005,2   | -0,447408092 | 0,1148794 | -3,894588 | 9,84E-05  | 0,0007387 | STX2     |
| ENSGALG00000002863  | 21477,092 | -0,447764784 | 0,1264663 | -3,540586 | 0,0003992 | 0,002482  | ERGIC1   |
| ENSGALG00000009645  | 4180,3141 | -0,447866483 | 0,1704432 | -2,627659 | 0,0085975 | 0,0311647 | ESRRG    |
| ENSGALG00000007437  | 4980,3271 | -0,447866955 | 0,1129748 | -3,96431  | 7,36E-05  | 0,0005753 | DPP8     |
| ENSGALG000000012914 | 8462,3227 | -0,447972492 | 0,15259   | -2,935792 | 0,003327  | 0,0143208 | PRKDC    |
| ENSGALG000000010612 | 2716,3259 | -0,44797699  | 0,144448  | -3,101302 | 0,0019267 | 0,0091476 | PRKD3    |
| ENSGALG000000013568 | 1779,8432 | -0,448058074 | 0,1709275 | -2,621333 | 0,0087587 | 0,0316302 | NR4A3    |
| ENSGALG000000016385 | 1906,4631 | -0,448510168 | 0,1379255 | -3,251829 | 0,0011467 | 0,0059985 | TSSC1    |
| ENSGALG00000000424  | 6758,6507 | -0,448587625 | 0,1462417 | -3,067441 | 0,002159  | 0,0100529 | CMTM3    |
| ENSGALG00000006656  | 4293,7935 | -0,448668509 | 0,1620852 | -2,768103 | 0,0056384 | 0,0221356 | FRMD4A   |
| ENSGALG000000011642 | 18424,345 | -0,448893503 | 0,1458916 | -3,076897 | 0,0020917 | 0,0098032 | ANKRD17  |
| ENSGALG000000001845 | 10040,892 | -0,449444654 | 0,1070784 | -4,197342 | 2,70E-05  | 0,0002425 | PHTF1    |
| ENSGALG000000012568 | 2033,2155 | -0,449796718 | 0,1384814 | -3,248067 | 0,0011619 | 0,0060519 | TIMP3    |
| ENSGALG00000006324  | 5540,5991 | -0,450353768 | 0,1447725 | -3,110768 | 0,001866  | 0,0088831 | PFKFB3   |
| ENSGALG000000012598 | 6595,5132 | -0,450640697 | 0,1225301 | -3,677795 | 0,0002353 | 0,0015709 | NAA35    |
| ENSGALG00000002519  | 3426,1294 | -0,450983038 | 0,1241584 | -3,632319 | 0,0002809 | 0,0018351 | SLC25A33 |
| ENSGALG00000007652  | 11015,319 | -0,451211126 | 0,1103319 | -4,089582 | 4,32E-05  | 0,0003619 | SUCLG2   |
| ENSGALG00000005959  | 3317,973  | -0,451515508 | 0,1209724 | -3,732383 | 0,0001897 | 0,0013056 | GLMN     |
| ENSGALG000000016803 | 4775,6071 | -0,451555414 | 0,1329918 | -3,395363 | 0,0006854 | 0,0039109 | ST6GAL2  |
| ENSGALG00000002663  | 8380,3175 | -0,451591009 | 0,1168807 | -3,863693 | 0,0001117 | 0,0008235 | ATR      |
| ENSGALG00000007075  | 11514,123 | -0,451627608 | 0,1269002 | -3,558919 | 0,0003724 | 0,0023386 | ATP13A3  |
| ENSGALG00000004049  | 11640,773 | -0,45169714  | 0,107806  | -4,189907 | 2,79E-05  | 0,0002495 | ITFG1    |
| ENSGALG000000013579 | 24869,718 | -0,451701092 | 0,1629664 | -2,771743 | 0,0055757 | 0,0219585 | FAT1     |
| ENSGALG000000013233 | 9834,1286 | -0,4517759   | 0,1141463 | -3,957866 | 7,56E-05  | 0,0005873 | PPP1R9B  |
| ENSGALG00000006336  | 7051,0846 | -0,452052929 | 0,1247016 | -3,625078 | 0,0002889 | 0,0018818 | PAXIP1   |
| ENSGALG00000007659  | 35189,399 | -0,45246564  | 0,1027053 | -4,405474 | 1,06E-05  | 0,0001081 | HYOU1    |
| ENSGALG00000008088  | 3813,1419 | -0,452924609 | 0,1170567 | -3,869275 | 0,0001092 | 0,0008088 | ACSL4    |
| ENSGALG00000004291  | 6511,6259 | -0,453004371 | 0,1491475 | -3,037292 | 0,0023871 | 0,01091   | VPS13D   |
| ENSGALG00000008848  | 8858,4601 | -0,453382128 | 0,1083977 | -4,182581 | 2,88E-05  | 0,0002563 | SOX2     |
| ENSGALG00000009835  | 14808,429 | -0,453500739 | 0,1117239 | -4,059121 | 4,93E-05  | 0,0004065 | XPOT     |
| ENSGALG000000023480 | 1643,2534 | -0,453589407 | 0,1642924 | -2,760867 | 0,0057648 | 0,0225023 | FBXO39   |
| ENSGALG000000015458 | 9174,0129 | -0,453606012 | 0,1307234 | -3,469967 | 0,0005205 | 0,0031015 | ILDR2    |
| ENSGALG00000005716  | 3689,9521 | -0,453921562 | 0,1547747 | -2,932789 | 0,0033593 | 0,0144372 | SBF2     |
| ENSGALG00000004971  | 14464,929 | -0,454228028 | 0,152979  | -2,969218 | 0,0029856 | 0,0131129 | URM1     |
| ENSGALG00000005840  | 6869,8394 | -0,454270613 | 0,1158533 | -3,921086 | 8,82E-05  | 0,0006743 | DENND5A  |
| ENSGALG000000016074 | 1091,7628 | -0,454409142 | 0,1579184 | -2,877493 | 0,0040085 | 0,0167153 | RIMS2    |
| ENSGALG00000006094  | 10694,318 | -0,454736184 | 0,1116856 | -4,071574 | 4,67E-05  | 0,000387  | PHF6     |
| ENSGALG00000004713  | 12581,373 | -0,454819325 | 0,1044249 | -4,355468 | 1,33E-05  | 0,0001321 | LAS1L    |
| ENSGALG00000005160  | 9338,8368 | -0,454934871 | 0,1255105 | -3,624675 | 0,0002893 | 0,001883  | VMP1     |
| ENSGALG000000021883 | 1337,969  | -0,455471836 | 0,1467354 | -3,104035 | 0,001909  | 0,0090783 |          |



|                    |           |              |           |           |           |           |               |
|--------------------|-----------|--------------|-----------|-----------|-----------|-----------|---------------|
| ENSGALG00000005489 | 5406,3342 | -0,455551792 | 0,1294829 | -3,518238 | 0,0004344 | 0,0026634 | DDX52         |
| ENSGALG00000016196 | 5946,1092 | -0,455745009 | 0,1321926 | -3,447582 | 0,0005656 | 0,0033251 | CBS           |
| ENSGALG00000011191 | 11563,883 | -0,455971006 | 0,1072313 | -4,252219 | 2,12E-05  | 0,0001972 | EML1          |
| ENSGALG00000008839 | 9872,7485 | -0,456849267 | 0,1286669 | -3,550635 | 0,0003843 | 0,0023968 | ATP11B        |
| ENSGALG00000008415 | 6540,8044 | -0,456904989 | 0,1186805 | -3,849874 | 0,0001182 | 0,0008637 | ALS2          |
| ENSGALG00000000884 | 7194,478  | -0,456928071 | 0,1125409 | -4,060106 | 4,91E-05  | 0,000405  | CXXC5         |
| ENSGALG00000021592 | 966,74998 | -0,457097931 | 0,1634651 | -2,796303 | 0,0051691 | 0,0206083 | TLCD2         |
| ENSGALG00000002338 | 29369,786 | -0,457290151 | 0,1429103 | -3,199841 | 0,001375  | 0,0069517 | ASPM          |
| ENSGALG00000001179 | 4301,5313 | -0,45735712  | 0,1154017 | -3,963175 | 7,40E-05  | 0,0005777 | ARMC8         |
| ENSGALG00000023193 | 1113,686  | -0,457481355 | 0,1527665 | -2,994644 | 0,0027477 | 0,0122653 | SOCS1B        |
| ENSGALG00000002954 | 6734,124  | -0,457794297 | 0,1205807 | -3,79658  | 0,0001467 | 0,0010458 | MBTD1         |
| ENSGALG00000008497 | 15581,475 | -0,457962816 | 0,1156674 | -3,959307 | 7,52E-05  | 0,0005841 | SLC38A2       |
| ENSGALG00000007777 | 3900,1787 | -0,45814234  | 0,1287478 | -3,558449 | 0,0003731 | 0,0023406 | SLC39A10      |
| ENSGALG00000026322 | 5686,9342 | -0,458344915 | 0,1182055 | -3,877526 | 0,0001055 | 0,0007877 | ARMT1         |
| ENSGALG00000013647 | 1849,9954 | -0,458404091 | 0,1358218 | -3,375041 | 0,000738  | 0,004154  | TFB1M         |
| ENSGALG00000026639 | 1529,3689 | -0,458562471 | 0,139721  | -3,281988 | 0,0010308 | 0,0054735 | SMCO4         |
| ENSGALG00000004531 | 7125,0235 | -0,458962037 | 0,1117417 | -4,107348 | 4,00E-05  | 0,0003406 | PLOD1         |
| ENSGALG00000007842 | 5019,27   | -0,459124954 | 0,1174579 | -3,908847 | 9,27E-05  | 0,0007038 | PDHX          |
| ENSGALG00000016930 | 13372,763 | -0,459461549 | 0,1064549 | -4,316019 | 1,59E-05  | 0,0001534 | DIS3          |
| ENSGALG00000008705 | 14944,012 | -0,4597037   | 0,1096313 | -4,193181 | 2,75E-05  | 0,0002462 | TRABD         |
| ENSGALG00000015773 | 9016,2735 | -0,459782065 | 0,1064627 | -4,318717 | 1,57E-05  | 0,0001521 | PTCD3         |
| ENSGALG00000008482 | 22772,22  | -0,459855147 | 0,1105258 | -4,160612 | 3,17E-05  | 0,000279  | STAG2         |
| ENSGALG00000013406 | 738,83887 | -0,460037256 | 0,1721459 | -2,672369 | 0,0075318 | 0,0280715 | EOGT          |
| ENSGALG00000010411 | 14781,22  | -0,460452211 | 0,1181671 | -3,896619 | 9,75E-05  | 0,000735  | RNF13         |
| ENSGALG00000002501 | 3377,4292 | -0,46100497  | 0,1227582 | -3,755392 | 0,0001731 | 0,0012109 | RP11-196G11.1 |
| ENSGALG00000006281 | 5170,2004 | -0,461106682 | 0,1148963 | -4,013241 | 5,99E-05  | 0,0004808 | GTF2H1        |
| ENSGALG00000006078 | 2849,4853 | -0,461126659 | 0,1296477 | -3,556767 | 0,0003754 | 0,0023524 | PALB2         |
| ENSGALG00000016216 | 6550,317  | -0,461519219 | 0,1642494 | -2,809869 | 0,0049562 | 0,0199462 | NDRG1         |
| ENSGALG00000013893 | 1508,8689 | -0,461829974 | 0,1439203 | -3,208929 | 0,0013323 | 0,0067735 | MNS1          |
| ENSGALG00000015633 | 9547,4016 | -0,462141421 | 0,1057703 | -4,369294 | 1,25E-05  | 0,0001252 | TERF1         |
| ENSGALG00000016980 | 3122,8167 | -0,462357479 | 0,1258227 | -3,674674 | 0,0002382 | 0,0015871 | COG3          |
| ENSGALG00000013136 | 2283,1481 | -0,462408191 | 0,131854  | -3,506971 | 0,0004532 | 0,0027598 | AEBP2         |
| ENSGALG00000000687 | 3686,837  | -0,462411333 | 0,1264523 | -3,656806 | 0,0002554 | 0,0016878 | KIAA0556      |
| ENSGALG00000013306 | 1859,3469 | -0,463147904 | 0,1696975 | -2,729256 | 0,0063477 | 0,0243862 | DAGLA         |
| ENSGALG00000016445 | 7095,5905 | -0,463408352 | 0,1140354 | -4,063725 | 4,83E-05  | 0,000399  | NOL10         |
| ENSGALG00000009899 | 35232,794 | -0,46345514  | 0,1085537 | -4,269364 | 1,96E-05  | 0,0001844 | CAND1         |
| ENSGALG00000009974 | 634,62537 | -0,463813865 | 0,1807038 | -2,566708 | 0,0102669 | 0,0359195 | MMAA          |
| ENSGALG00000011794 | 10368,91  | -0,463824908 | 0,1147491 | -4,042078 | 5,30E-05  | 0,0004329 | DDX47         |
| ENSGALG00000007057 | 3861,2618 | -0,46473909  | 0,1208896 | -3,844327 | 0,0001209 | 0,0008806 | LRRC28        |
| ENSGALG00000010234 | 635,90171 | -0,464990416 | 0,1851223 | -2,511801 | 0,0120117 | 0,0406308 | MMACHC        |
| ENSGALG00000012655 | 11727,465 | -0,4651119   | 0,1097394 | -4,23833  | 2,25E-05  | 0,0002077 | POLR3B        |
| ENSGALG00000011630 | 13721,826 | -0,465130144 | 0,1774121 | -2,62175  | 0,008748  | 0,0316092 | GLI2          |
| ENSGALG00000015138 | 14137,444 | -0,465157078 | 0,1241857 | -3,745659 | 0,0001799 | 0,0012504 | TMEM2         |
| ENSGALG00000009507 | 1700,6819 | -0,465226456 | 0,1787644 | -2,602456 | 0,0092559 | 0,0330238 | PLEKHH1       |
| ENSGALG00000011677 | 985,1206  | -0,465468876 | 0,1657897 | -2,807586 | 0,0049914 | 0,0200413 | HSPBAP1       |
| ENSGALG00000002942 | 14672,633 | -0,465828236 | 0,1343592 | -3,467036 | 0,0005262 | 0,0031314 | JMJD1C        |
| ENSGALG00000014217 | 2291,1249 | -0,46602463  | 0,1389942 | -3,352834 | 0,0007999 | 0,0044469 | GUF1          |
| ENSGALG00000010054 | 3266,3331 | -0,466429533 | 0,1270851 | -3,670215 | 0,0002423 | 0,0016127 | RP11-561B11.2 |
| ENSGALG00000004158 | 2874,2398 | -0,467330867 | 0,1229214 | -3,801867 | 0,0001436 | 0,0010258 | GPT2          |
| ENSGALG00000028849 | 26828,63  | -0,467375912 | 0,1168899 | -3,99843  | 6,38E-05  | 0,0005068 | SCAF11        |
| ENSGALG00000011309 | 5857,3376 | -0,467663025 | 0,1226263 | -3,813725 | 0,0001369 | 0,0009866 | PLXNC1        |
| ENSGALG00000013728 | 12921,155 | -0,467853342 | 0,1080614 | -4,329513 | 1,49E-05  | 0,0001465 | PPAT          |
| ENSGALG00000013765 | 8392,681  | -0,468026469 | 0,1155365 | -4,050895 | 5,10E-05  | 0,0004182 | RP3-468K18.7  |
| ENSGALG00000002282 | 2493,1225 | -0,468163907 | 0,1304601 | -3,588561 | 0,0003325 | 0,0021254 | TMEM200A      |
| ENSGALG00000000895 | 27062,291 | -0,468166268 | 0,1101353 | -4,250829 | 2,13E-05  | 0,0001979 | NUDC          |
| ENSGALG00000017309 | 912,73532 | -0,468669212 | 0,1805876 | -2,595246 | 0,0094523 | 0,0335839 | RNF169        |
| ENSGALG00000002655 | 6693,9795 | -0,468798244 | 0,1325586 | -3,536536 | 0,0004054 | 0,0025147 | ITGAV         |
| ENSGALG00000006121 | 11011,198 | -0,468808823 | 0,116573  | -4,021589 | 5,78E-05  | 0,0004665 | PIK3C2A       |
| ENSGALG00000011232 | 2855,7622 | -0,469477808 | 0,1239226 | -3,788475 | 0,0001516 | 0,0010765 | STK11IP       |
| ENSGALG00000006638 | 2375,8984 | -0,469621749 | 0,1392735 | -3,37194  | 0,0007464 | 0,0041941 | GRIK4         |
| ENSGALG00000009954 | 1375,372  | -0,469791805 | 0,1450112 | -3,239694 | 0,0011966 | 0,0062039 | DYNC2LI1      |
| ENSGALG00000007058 | 9479,7297 | -0,469857249 | 0,1077974 | -4,358706 | 1,31E-05  | 0,0001303 | LSG1          |

|                    |           |              |           |           |           |           |           |
|--------------------|-----------|--------------|-----------|-----------|-----------|-----------|-----------|
| ENSGALG00000011101 | 5741,1035 | -0,47005983  | 0,1114966 | -4,215912 | 2,49E-05  | 0,0002267 | URB2      |
| ENSGALG00000001424 | 896,527   | -0,470247    | 0,1654153 | -2,842827 | 0,0044715 | 0,0182515 | YDJC      |
| ENSGALG00000010434 | 945,24487 | -0,470849898 | 0,1876053 | -2,509791 | 0,0120803 | 0,0407919 | CP        |
| ENSGALG00000000843 | 7211,6886 | -0,471124949 | 0,1430863 | -3,292592 | 0,0009927 | 0,0053002 | DOT1L     |
| ENSGALG00000011246 | 5026,827  | -0,471179653 | 0,1165719 | -4,041966 | 5,30E-05  | 0,0004329 | CHPF      |
| ENSGALG00000007564 | 1255,8688 | -0,471313446 | 0,1490623 | -3,161856 | 0,0015677 | 0,0077305 |           |
| ENSGALG00000011537 | 2857,0805 | -0,471339277 | 0,1817158 | -2,593827 | 0,0094914 | 0,0336858 | PDE10A    |
| ENSGALG00000016836 | 6379,6617 | -0,471449962 | 0,1187504 | -3,970091 | 7,18E-05  | 0,0005636 | TUBGCP3   |
| ENSGALG00000002439 | 1784,311  | -0,471657703 | 0,1533679 | -3,075335 | 0,0021027 | 0,0098513 | BDP1      |
| ENSGALG00000000721 | 4145,8062 | -0,47173717  | 0,1427965 | -3,303562 | 0,0009546 | 0,0051475 | SLC41A1   |
| ENSGALG00000008837 | 13730,848 | -0,471745405 | 0,1080446 | -4,366209 | 1,26E-05  | 0,0001264 | PELI1     |
| ENSGALG00000026412 | 3599,375  | -0,471881516 | 0,1379941 | -3,419578 | 0,0006272 | 0,0036213 |           |
| ENSGALG00000016195 | 2664,1039 | -0,472549861 | 0,1405226 | -3,362804 | 0,0007716 | 0,0043194 | COL22A1   |
| ENSGALG00000004228 | 2475,7819 | -0,472593441 | 0,1261151 | -3,747317 | 0,0001787 | 0,0012448 | TRAF3IP1  |
| ENSGALG00000012647 | 9993,6453 | -0,472701385 | 0,125933  | -3,753594 | 0,0001743 | 0,0012177 | RFX4      |
| ENSGALG00000001627 | 4772,9003 | -0,472962819 | 0,1154681 | -4,096047 | 4,20E-05  | 0,0003545 | CPNE1     |
| ENSGALG00000026192 | 2515,1802 | -0,473341595 | 0,1470736 | -3,218399 | 0,0012891 | 0,0066005 | ST8SIA4   |
| ENSGALG00000028267 | 15487,152 | -0,473386218 | 0,114594  | -4,130988 | 3,61E-05  | 0,0003117 | GOLPH3    |
| ENSGALG00000006296 | 11149,265 | -0,47366212  | 0,1093498 | -4,331622 | 1,48E-05  | 0,0001453 | SON       |
| ENSGALG00000014903 | 1822,8102 | -0,474039661 | 0,1650108 | -2,87278  | 0,0040688 | 0,0169304 | ITGA2     |
| ENSGALG00000004055 | 3994,9616 | -0,474043343 | 0,1194933 | -3,967113 | 7,27E-05  | 0,0005696 | C7orf50   |
| ENSGALG00000027678 | 2192,33   | -0,474178987 | 0,1641393 | -2,888881 | 0,0038662 | 0,0162692 | SLC35G1   |
| ENSGALG00000027440 | 2934,027  | -0,474361212 | 0,127321  | -3,725711 | 0,0001948 | 0,0013332 | COX20     |
| ENSGALG00000004889 | 8112,9525 | -0,474641509 | 0,1093142 | -4,341993 | 1,41E-05  | 0,0001397 | SLC2A1    |
| ENSGALG00000005211 | 6813,7998 | -0,474686708 | 0,1155357 | -4,108572 | 3,98E-05  | 0,0003396 | NAE1      |
| ENSGALG00000026034 | 1070,3788 | -0,47474594  | 0,1567205 | -3,029253 | 0,0024516 | 0,0111484 | RGS17     |
| ENSGALG00000010182 | 7219,0566 | -0,474781283 | 0,1123939 | -4,224264 | 2,40E-05  | 0,0002195 | SLC29A1   |
| ENSGALG00000015925 | 3585,1162 | -0,475263897 | 0,1282784 | -3,704941 | 0,0002114 | 0,0014344 | MB21D1    |
| ENSGALG00000026989 | 16347,278 | -0,47543634  | 0,1239145 | -3,83681  | 0,0001246 | 0,0009056 |           |
| ENSGALG00000006698 | 967,37858 | -0,475588456 | 0,1653212 | -2,876753 | 0,0040179 | 0,0167494 | ABCC6     |
| ENSGALG00000002783 | 1895,8368 | -0,475653855 | 0,1505722 | -3,158976 | 0,0015832 | 0,0077802 | SLC43A2   |
| ENSGALG00000016409 | 21993,092 | -0,475709899 | 0,1119047 | -4,251027 | 2,13E-05  | 0,0001979 | KIDINS220 |
| ENSGALG00000004957 | 935,39904 | -0,476296229 | 0,1744085 | -2,730924 | 0,0063157 | 0,024288  | RHBDD1    |
| ENSGALG00000008686 | 2315,3907 | -0,476496754 | 0,1292591 | -3,686368 | 0,0002275 | 0,0015287 | TRDMT1    |
| ENSGALG00000006906 | 7509,2168 | -0,477103418 | 0,1079356 | -4,420261 | 9,86E-06  | 0,0001016 | CHM       |
| ENSGALG00000009841 | 1397,5061 | -0,477667905 | 0,1552355 | -3,077053 | 0,0020906 | 0,0098032 | FASTKD1   |
| ENSGALG00000011342 | 3208,6738 | -0,478233256 | 0,1425056 | -3,355892 | 0,0007911 | 0,0044106 | FGD6      |
| ENSGALG00000002045 | 30343,402 | -0,478318973 | 0,0998188 | -4,791874 | 1,65E-06  | 2,05E-05  | EIF2S2    |
| ENSGALG00000002460 | 17010     | -0,480154381 | 0,105142  | -4,566722 | 4,95E-06  | 5,50E-05  | WDR75     |
| ENSGALG00000002862 | 5434,2601 | -0,480739106 | 0,1110641 | -4,328483 | 1,50E-05  | 0,0001471 | RRN3      |
| ENSGALG00000012484 | 32855,96  | -0,4809575   | 0,1211628 | -3,969513 | 7,20E-05  | 0,0005645 | RIF1      |
| ENSGALG00000010884 | 11252,816 | -0,481115067 | 0,1148894 | -4,187635 | 2,82E-05  | 0,0002518 | DDX24     |
| ENSGALG00000015901 | 15729,886 | -0,481643321 | 0,1054274 | -4,568482 | 4,91E-06  | 5,46E-05  | SENP6     |
| ENSGALG00000023516 | 18924,681 | -0,48179177  | 0,1052391 | -4,578068 | 4,69E-06  | 5,25E-05  | PHRF1     |
| ENSGALG00000002294 | 3404,1182 | -0,482168758 | 0,1282462 | -3,759711 | 0,0001701 | 0,0011932 | SEMA6A    |
| ENSGALG00000007948 | 1369,1179 | -0,482500979 | 0,1814408 | -2,659276 | 0,0078309 | 0,0289722 | LRRC4C    |
| ENSGALG00000001612 | 1053,9675 | -0,482944134 | 0,1589083 | -3,039137 | 0,0023726 | 0,0108507 | HEXDC     |
| ENSGALG00000003078 | 20488,019 | -0,483195985 | 0,106301  | -4,545546 | 5,48E-06  | 5,97E-05  | MMD       |
| ENSGALG00000008765 | 5344,7574 | -0,483352119 | 0,1278807 | -3,779711 | 0,000157  | 0,0011099 | C1D       |
| ENSGALG00000005134 | 3683,9209 | -0,483437706 | 0,1457126 | -3,317748 | 0,0009075 | 0,0049361 | ZSWIM8    |
| ENSGALG00000000569 | 10192,548 | -0,483580181 | 0,1749621 | -2,763914 | 0,0057113 | 0,0223253 | SDC3      |
| ENSGALG00000009967 | 51604,136 | -0,483675694 | 0,1030754 | -4,692447 | 2,70E-06  | 3,17E-05  | LRPPRC    |
| ENSGALG00000012702 | 17854,641 | -0,483830731 | 0,1194258 | -4,051309 | 5,09E-05  | 0,000418  | JARID2    |
| ENSGALG00000015830 | 24016,122 | -0,484314141 | 0,1030076 | -4,70173  | 2,58E-06  | 3,04E-05  | SYNCRIP   |
| ENSGALG00000004887 | 17300,511 | -0,484420703 | 0,1068743 | -4,532622 | 5,83E-06  | 6,30E-05  | SART3     |
| ENSGALG00000002781 | 17608,172 | -0,484707648 | 0,1272601 | -3,808796 | 0,0001396 | 0,0010028 | BRCA1     |
| ENSGALG00000001950 | 14346,845 | -0,484721287 | 0,11288   | -4,294128 | 1,75E-05  | 0,0001671 | PMPCA     |
| ENSGALG00000001777 | 2307,3102 | -0,484938734 | 0,1469529 | -3,299961 | 0,000967  | 0,0051935 | MFSD11    |
| ENSGALG00000002198 | 1337,3607 | -0,485078535 | 0,1489905 | -3,255768 | 0,0011309 | 0,0059241 | FHOD1     |
| ENSGALG00000004416 | 1683,2285 | -0,485858255 | 0,141996  | -3,421634 | 0,0006225 | 0,0035994 | TTC19     |
| ENSGALG00000012258 | 6299,7876 | -0,485912726 | 0,1153331 | -4,213123 | 2,52E-05  | 0,0002288 | GOLGA4    |
| ENSGALG00000013745 | 3956,926  | -0,486562498 | 0,1295758 | -3,755041 | 0,0001733 | 0,0012113 | RTTN      |

|                     |           |              |           |           |           |           |               |
|---------------------|-----------|--------------|-----------|-----------|-----------|-----------|---------------|
| ENSGALG00000008862  | 12336,53  | -0,486712741 | 0,1063335 | -4,57723  | 4,71E-06  | 5,26E-05  | DNAJC10       |
| ENSGALG00000008670  | 2394,2538 | -0,486758564 | 0,1345509 | -3,617654 | 0,0002973 | 0,0019265 | C1orf52       |
| ENSGALG00000009157  | 10495,932 | -0,48696748  | 0,111678  | -4,36046  | 1,30E-05  | 0,0001295 | ECT2          |
| ENSGALG00000002906  | 23481,039 | -0,487686151 | 0,1087191 | -4,485745 | 7,27E-06  | 7,71E-05  | TARDBP        |
| ENSGALG00000008155  | 684,45488 | -0,487898949 | 0,1882495 | -2,591767 | 0,0095484 | 0,0338282 | KCTD18        |
| ENSGALG00000005198  | 7882,4671 | -0,488262054 | 0,1163467 | -4,196612 | 2,71E-05  | 0,0002432 | RPS6KB1       |
| ENSGALG00000004750  | 7577,7666 | -0,488295007 | 0,1092829 | -4,468172 | 7,89E-06  | 8,32E-05  | NOL8          |
| ENSGALG00000010570  | 52092,719 | -0,488515596 | 0,1005153 | -4,860111 | 1,17E-06  | 1,51E-05  | BTF3L4        |
| ENSGALG00000016909  | 4324,6991 | -0,488526858 | 0,1162572 | -4,202121 | 2,64E-05  | 0,0002386 | NDFIP2        |
| ENSGALG00000004638  | 3370,7614 | -0,48870476  | 0,1414816 | -3,454194 | 0,0005519 | 0,0032587 | HEPH          |
| ENSGALG00000001036  | 9684,7005 | -0,488799588 | 0,1105545 | -4,421345 | 9,81E-06  | 0,0001012 | ELAC2         |
| ENSGALG00000009981  | 1405,745  | -0,49003231  | 0,1465298 | -3,34425  | 0,0008251 | 0,004546  | PREPL         |
| ENSGALG00000010638  | 13156,313 | -0,49033693  | 0,1208756 | -4,056541 | 4,98E-05  | 0,0004107 | CASP3         |
| ENSGALG00000006252  | 14647,749 | -0,49037706  | 0,1393987 | -3,517803 | 0,0004351 | 0,0026662 | LMO4          |
| ENSGALG00000000272  | 5267,8402 | -0,490419343 | 0,1354436 | -3,620838 | 0,0002936 | 0,0019059 | CDCA2         |
| ENSGALG00000008553  | 5356,6273 | -0,490452503 | 0,1346372 | -3,642771 | 0,0002697 | 0,0017672 | INO80         |
| ENSGALG00000010013  | 1321,1558 | -0,490665695 | 0,1680223 | -2,920241 | 0,0034976 | 0,0149466 | EDNRA         |
| ENSGALG00000000367  | 793,50452 | -0,492073862 | 0,2010375 | -2,447672 | 0,0143783 | 0,0467543 | ASIC2         |
| ENSGALG00000016404  | 5806,1629 | -0,492286998 | 0,1192985 | -4,126516 | 3,68E-05  | 0,0003166 | MTBP          |
| ENSGALG00000010335  | 1726,889  | -0,492481433 | 0,1437148 | -3,426798 | 0,0006107 | 0,0035505 | PIK3R3        |
| ENSGALG000000002141 | 14007,058 | -0,492600599 | 0,1062141 | -4,637807 | 3,52E-06  | 4,03E-05  | UGGT1         |
| ENSGALG00000008871  | 16063,59  | -0,492812674 | 0,1349508 | -3,651796 | 0,0002604 | 0,0017161 | LPHN2         |
| ENSGALG00000015059  | 7575,55   | -0,49315511  | 0,1131114 | -4,359906 | 1,30E-05  | 0,0001297 |               |
| ENSGALG00000005652  | 5954,5779 | -0,493244478 | 0,113265  | -4,354781 | 1,33E-05  | 0,0001323 | DIDO1         |
| ENSGALG00000014218  | 876,2756  | -0,493463947 | 0,1862713 | -2,649168 | 0,008069  | 0,0296038 | PHF21B        |
| ENSGALG000000023576 | 3299,2992 | -0,493564294 | 0,1207816 | -4,086419 | 4,38E-05  | 0,0003657 | PIM3          |
| ENSGALG00000008798  | 4574,7649 | -0,493864419 | 0,1182978 | -4,174757 | 2,98E-05  | 0,0002639 | ZMYND19       |
| ENSGALG000000020742 | 13114,145 | -0,493871262 | 0,1393963 | -3,54293  | 0,0003957 | 0,0024612 | PPRC1         |
| ENSGALG00000011962  | 7036,6211 | -0,494326456 | 0,1348846 | -3,664809 | 0,0002475 | 0,0016447 | NDNF          |
| ENSGALG00000015478  | 5554,5683 | -0,494614804 | 0,1302844 | -3,796423 | 0,0001468 | 0,0010459 | USP45         |
| ENSGALG00000007326  | 7076,3591 | -0,494698301 | 0,1094474 | -4,519964 | 6,19E-06  | 6,66E-05  | PMM2          |
| ENSGALG00000005683  | 5447,0767 | -0,494902817 | 0,117901  | -4,197614 | 2,70E-05  | 0,0002424 | ARHGAP29      |
| ENSGALG00000010960  | 1065,9668 | -0,495730596 | 0,183425  | -2,702634 | 0,0068792 | 0,0260314 | GALNT3        |
| ENSGALG00000000795  | 1504,9365 | -0,495778483 | 0,1425043 | -3,479042 | 0,0005032 | 0,0030142 | MFSD12        |
| ENSGALG00000004273  | 11441,37  | -0,495936282 | 0,1511882 | -3,280258 | 0,0010371 | 0,005505  | RALGPS2       |
| ENSGALG00000014998  | 1987,961  | -0,495971981 | 0,1542046 | -3,216325 | 0,0012984 | 0,0066435 | CABLES1       |
| ENSGALG00000015684  | 4408,6888 | -0,496145153 | 0,1139834 | -4,352783 | 1,34E-05  | 0,0001334 | DNAJC25       |
| ENSGALG00000004570  | 5026,7973 | -0,496270556 | 0,1351131 | -3,673    | 0,0002397 | 0,001596  | NCOA3         |
| ENSGALG00000013257  | 123007,22 | -0,496798558 | 0,1026267 | -4,840832 | 1,29E-06  | 1,64E-05  | LDHB          |
| ENSGALG00000027635  | 9027,1813 | -0,49702612  | 0,1189634 | -4,177976 | 2,94E-05  | 0,0002609 | NME4          |
| ENSGALG00000005583  | 1029,2928 | -0,497171251 | 0,1674424 | -2,969208 | 0,0029857 | 0,0131129 | ALG14         |
| ENSGALG00000003596  | 25796,912 | -0,497856616 | 0,162082  | -3,071634 | 0,0021289 | 0,0099471 | TRRAP         |
| ENSGALG00000010624  | 9648,3759 | -0,498764877 | 0,1086145 | -4,592066 | 4,39E-06  | 4,91E-05  | MEMO1         |
| ENSGALG00000026865  | 1245,9917 | -0,49909443  | 0,1619603 | -3,081585 | 0,002059  | 0,0096734 | XRCC2         |
| ENSGALG00000007691  | 3206,9135 | -0,499115113 | 0,1294529 | -3,855572 | 0,0001155 | 0,0008465 | ARMC9         |
| ENSGALG00000007155  | 2000,5013 | -0,499370494 | 0,1491539 | -3,348022 | 0,0008139 | 0,0044973 | RMI2          |
| ENSGALG00000003874  | 8943,2552 | -0,499635075 | 0,1097884 | -4,550893 | 5,34E-06  | 5,87E-05  | HEATR3        |
| ENSGALG00000005695  | 3266,3031 | -0,500082186 | 0,1314863 | -3,803302 | 0,0001428 | 0,0010204 | CHEK2         |
| ENSGALG00000025792  | 3188,1064 | -0,500292681 | 0,1218494 | -4,105829 | 4,03E-05  | 0,0003426 | FRRS1L        |
| ENSGALG00000011264  | 1925,3077 | -0,500518992 | 0,1479576 | -3,382854 | 0,0007174 | 0,0040628 | SULF1         |
| ENSGALG00000016758  | 1465,7896 | -0,5005603   | 0,1465611 | -3,415369 | 0,000637  | 0,0036653 | LIPT1         |
| ENSGALG00000010716  | 5501,7296 | -0,50085931  | 0,1188557 | -4,214011 | 2,51E-05  | 0,0002282 | AGA           |
| ENSGALG00000009269  | 3597,5456 | -0,501724842 | 0,1302073 | -3,853278 | 0,0001165 | 0,000854  | RP5-1021I20.4 |
| ENSGALG00000011857  | 24467,231 | -0,502240381 | 0,105172  | -4,775418 | 1,79E-06  | 2,19E-05  | LUC7L2        |
| ENSGALG00000003719  | 6864,0435 | -0,502933526 | 0,135236  | -3,718932 | 0,0002001 | 0,0013633 | CHD9          |
| ENSGALG00000024035  | 1950,9384 | -0,503656541 | 0,1918019 | -2,625921 | 0,0086415 | 0,0312743 | EPS8L2        |
| ENSGALG00000006524  | 12378,285 | -0,503792354 | 0,1077015 | -4,677671 | 2,90E-06  | 3,38E-05  | NOC3L         |
| ENSGALG00000016781  | 17546,507 | -0,504088725 | 0,1248435 | -4,037765 | 5,40E-05  | 0,0004399 | MAP4K4        |
| ENSGALG00000014922  | 15076,997 | -0,504425665 | 0,118689  | -4,249979 | 2,14E-05  | 0,0001986 | ROCK1         |
| ENSGALG00000004690  | 52340,48  | -0,504461763 | 0,1007635 | -5,006396 | 5,55E-07  | 7,63E-06  | MAPK6         |
| ENSGALG00000002728  | 6868,7758 | -0,504726866 | 0,1233642 | -4,091357 | 4,29E-05  | 0,0003598 | SLC16A3       |
| ENSGALG00000011877  | 4219,7935 | -0,504776099 | 0,1219876 | -4,137928 | 3,50E-05  | 0,0003041 | LARS2         |

|                    |           |              |           |           |           |           |               |
|--------------------|-----------|--------------|-----------|-----------|-----------|-----------|---------------|
| ENSGALG00000005533 | 4875,7726 | -0,504976403 | 0,1222357 | -4,131171 | 3,61E-05  | 0,0003116 | ZMYM3         |
| ENSGALG00000013209 | 5984,6391 | -0,505418476 | 0,1115613 | -4,530409 | 5,89E-06  | 6,36E-05  | SLC39A6       |
| ENSGALG00000015252 | 4947,9442 | -0,505578034 | 0,1423502 | -3,551649 | 0,0003828 | 0,0023887 | ST3GAL6       |
| ENSGALG00000007234 | 4564,3675 | -0,505755971 | 0,117953  | -4,287774 | 1,80E-05  | 0,000171  | CLCN5         |
| ENSGALG00000010034 | 2578,0952 | -0,50624459  | 0,1322184 | -3,828852 | 0,0001287 | 0,0009324 |               |
| ENSGALG00000009556 | 2369,7227 | -0,506316289 | 0,2035819 | -2,487039 | 0,0128811 | 0,0429423 | PRICKLE1      |
| ENSGALG00000003540 | 2816,5136 | -0,506324474 | 0,1426366 | -3,549751 | 0,0003856 | 0,0024027 | CEP95         |
| ENSGALG00000005992 | 1391,4533 | -0,506625581 | 0,1532979 | -3,304844 | 0,0009503 | 0,0051298 | PDE8A         |
| ENSGALG00000000271 | 3107,1088 | -0,506687982 | 0,1663878 | -3,045222 | 0,0023251 | 0,0106766 | C2CD2L        |
| ENSGALG00000006935 | 12264,183 | -0,506724591 | 0,1094246 | -4,630812 | 3,64E-06  | 4,15E-05  | BTAF1         |
| ENSGALG00000019867 | 6166,9755 | -0,506841982 | 0,1119268 | -4,528335 | 5,95E-06  | 6,41E-05  | WDCP          |
| ENSGALG00000008420 | 3322,248  | -0,507225725 | 0,1221905 | -4,151106 | 3,31E-05  | 0,0002888 | CAND2         |
| ENSGALG00000012020 | 2468,0174 | -0,507245855 | 0,184003  | -2,756726 | 0,0058383 | 0,0227414 | KIAA1549L     |
| ENSGALG00000009782 | 45976,854 | -0,507579083 | 0,1062698 | -4,776324 | 1,79E-06  | 2,18E-05  | NAA15         |
| ENSGALG00000004118 | 1623,6627 | -0,508229667 | 0,1686061 | -3,014301 | 0,0025757 | 0,0115852 |               |
| ENSGALG00000002424 | 2020,6569 | -0,508419582 | 0,160293  | -3,171813 | 0,0015149 | 0,0074947 | RECQL5        |
| ENSGALG00000002652 | 8163,3179 | -0,509052755 | 0,1365252 | -3,728635 | 0,0001925 | 0,0013231 | FZD10         |
| ENSGALG00000005509 | 6460,5427 | -0,509428544 | 0,1427708 | -3,568157 | 0,0003595 | 0,0022671 | DPYD          |
| ENSGALG00000004990 | 1688,4348 | -0,509590179 | 0,1471207 | -3,463756 | 0,0005327 | 0,0031615 | C10orf11      |
| ENSGALG00000002505 | 458,85789 | -0,509844408 | 0,2099041 | -2,42894  | 0,015143  | 0,0487175 |               |
| ENSGALG00000010735 | 16013,937 | -0,510060882 | 0,1046006 | -4,876271 | 1,08E-06  | 1,40E-05  | NDC1          |
| ENSGALG00000003628 | 14552,598 | -0,510073233 | 0,1414317 | -3,6065   | 0,0003104 | 0,0019979 | TLN2          |
| ENSGALG00000015787 | 3935,8112 | -0,510253054 | 0,1410404 | -3,617779 | 0,0002971 | 0,0019265 | RNGTT         |
| ENSGALG00000008778 | 6210,2201 | -0,51039033  | 0,1491907 | -3,421059 | 0,0006238 | 0,0036047 | SPRED2        |
| ENSGALG00000012135 | 48183,581 | -0,511735314 | 0,1079748 | -4,739395 | 2,14E-06  | 2,56E-05  | ATF4          |
| ENSGALG00000017085 | 4116,9494 | -0,511832688 | 0,125074  | -4,092239 | 4,27E-05  | 0,0003593 | SLC7A1        |
| ENSGALG00000002709 | 2938,4248 | -0,511853662 | 0,1402453 | -3,649703 | 0,0002625 | 0,0017285 | MYO1C         |
| ENSGALG00000004621 | 8629,8848 | -0,512109985 | 0,1230296 | -4,162493 | 3,15E-05  | 0,0002769 | PREX1         |
| ENSGALG00000005278 | 9525,2437 | -0,512823817 | 0,1583471 | -3,238605 | 0,0012012 | 0,0062229 | CDH11         |
| ENSGALG00000014791 | 22071,934 | -0,513191503 | 0,1237594 | -4,146686 | 3,37E-05  | 0,0002936 | WDR3          |
| ENSGALG00000009825 | 16041,569 | -0,51401966  | 0,1105113 | -4,651284 | 3,30E-06  | 3,80E-05  | SRGAP1        |
| ENSGALG00000001441 | 10679     | -0,514329303 | 0,1052351 | -4,88743  | 1,02E-06  | 1,33E-05  | UBE2G1        |
| ENSGALG00000026468 | 7333,857  | -0,514962132 | 0,1096475 | -4,696525 | 2,65E-06  | 3,11E-05  | CHSY1         |
| ENSGALG00000002646 | 11173,638 | -0,515104787 | 0,1477459 | -3,486422 | 0,0004895 | 0,0029478 | FAM171B       |
| ENSGALG00000005653 | 3018,7755 | -0,515161656 | 0,1231259 | -4,184022 | 2,86E-05  | 0,0002552 | NFKB2         |
| ENSGALG00000011707 | 2975,9589 | -0,516018775 | 0,1353146 | -3,813473 | 0,000137  | 0,0009866 | UBA5          |
| ENSGALG00000003566 | 2456,1483 | -0,516245691 | 0,1356954 | -3,804444 | 0,0001421 | 0,0010168 | SMURF2        |
| ENSGALG00000003047 | 12574,653 | -0,516252465 | 0,132068  | -3,908991 | 9,27E-05  | 0,0007038 | SUGP2         |
| ENSGALG00000009784 | 1512,522  | -0,516604655 | 0,1915407 | -2,697101 | 0,0069946 | 0,0263872 | PTPN14        |
| ENSGALG00000006830 | 714,61116 | -0,51666647  | 0,1768872 | -2,920882 | 0,0034904 | 0,0149206 | CHID1         |
| ENSGALG00000007527 | 4564,3635 | -0,516973735 | 0,1183481 | -4,368248 | 1,25E-05  | 0,0001255 | ADARB1        |
| ENSGALG00000012550 | 2418,3256 | -0,517745286 | 0,1390423 | -3,723653 | 0,0001964 | 0,0013434 | HMOX1         |
| ENSGALG00000009207 | 1636,7589 | -0,518081559 | 0,1511771 | -3,426985 | 0,0006103 | 0,0035496 | TRIM2         |
| ENSGALG00000012207 | 4193,9067 | -0,518404651 | 0,1155257 | -4,487352 | 7,21E-06  | 7,66E-05  | CCNT2         |
| ENSGALG00000009451 | 10542,681 | -0,518444547 | 0,1054026 | -4,918707 | 8,71E-07  | 1,14E-05  | PPID          |
| ENSGALG00000010189 | 6061,8235 | -0,518843565 | 0,1108188 | -4,681909 | 2,84E-06  | 3,32E-05  | RP11-407N17.3 |
| ENSGALG00000011596 | 8210,1595 | -0,519655791 | 0,1247256 | -4,166392 | 3,09E-05  | 0,0002731 | PTPN4         |
| ENSGALG00000006622 | 2389,7433 | -0,520113735 | 0,1331747 | -3,9055   | 9,40E-05  | 0,0007116 | FRA10AC1      |
| ENSGALG00000014784 | 4045,4061 | -0,520975246 | 0,1405154 | -3,707602 | 0,0002092 | 0,0014201 | MAST4         |
| ENSGALG00000009992 | 11680,473 | -0,521017168 | 0,1135606 | -4,588008 | 4,47E-06  | 5,01E-05  | ARHGAP5       |
| ENSGALG00000015889 | 13285,71  | -0,52134607  | 0,1484689 | -3,511482 | 0,0004456 | 0,0027219 | PHIP          |
| ENSGALG00000007752 | 6790,4614 | -0,521363763 | 0,1083691 | -4,811    | 1,50E-06  | 1,88E-05  | COPS7B        |
| ENSGALG00000005850 | 15672,107 | -0,521743975 | 0,1094822 | -4,765559 | 1,88E-06  | 2,29E-05  | FNBP1L        |
| ENSGALG00000012354 | 2395,6585 | -0,521764337 | 0,1590822 | -3,27984  | 0,0010387 | 0,005511  | VOPP1         |
| ENSGALG00000015314 | 12934,444 | -0,521997148 | 0,1092952 | -4,77603  | 1,79E-06  | 2,19E-05  | BEND3         |
| ENSGALG00000001109 | 1011,8383 | -0,522206198 | 0,1701303 | -3,069449 | 0,0021445 | 0,0100027 | GTSF1         |
| ENSGALG00000004397 | 3452,7405 | -0,523035736 | 0,1275508 | -4,100607 | 4,12E-05  | 0,0003498 | MLXIP         |
| ENSGALG00000012592 | 3142,2738 | -0,523397807 | 0,1406662 | -3,720849 | 0,0001986 | 0,0013557 | RMI1          |
| ENSGALG00000006811 | 8467,8095 | -0,523451296 | 0,1844356 | -2,838125 | 0,0045379 | 0,0184744 | ZIC1          |
| ENSGALG00000002487 | 10163,363 | -0,523537895 | 0,1313011 | -3,987308 | 6,68E-05  | 0,0005281 | SFSWAP        |
| ENSGALG00000003260 | 9438,4125 | -0,523953501 | 0,1105482 | -4,739594 | 2,14E-06  | 2,56E-05  | UTP6          |
| ENSGALG00000012720 | 24474,404 | -0,524679114 | 0,1115414 | -4,703897 | 2,55E-06  | 3,01E-05  | NUP153        |

|                    |           |              |           |           |           |           |          |
|--------------------|-----------|--------------|-----------|-----------|-----------|-----------|----------|
| ENSGALG00000005425 | 38874,994 | -0,524696803 | 0,1183507 | -4,433407 | 9,28E-06  | 9,63E-05  | OGT      |
| ENSGALG00000010861 | 2392,2986 | -0,524736464 | 0,1328216 | -3,950687 | 7,79E-05  | 0,0006035 | OMA1     |
| ENSGALG00000004489 | 1483,1995 | -0,524803254 | 0,1455768 | -3,604991 | 0,0003122 | 0,0020076 |          |
| ENSGALG00000011770 | 14710,919 | -0,525890593 | 0,1188458 | -4,424984 | 9,64E-06  | 9,98E-05  | UMPS     |
| ENSGALG00000002850 | 6570,4074 | -0,526275555 | 0,1347444 | -3,905733 | 9,39E-05  | 0,0007113 | RASA2    |
| ENSGALG00000023562 | 1492,3921 | -0,526424205 | 0,1608921 | -3,271908 | 0,0010682 | 0,0056493 | TEX9     |
| ENSGALG00000015836 | 3297,8542 | -0,526441345 | 0,132466  | -3,974163 | 7,06E-05  | 0,0005557 | CEP162   |
| ENSGALG00000014426 | 14003,05  | -0,526522361 | 0,1207296 | -4,361172 | 1,29E-05  | 0,0001291 | KPNA1    |
| ENSGALG00000009172 | 566,03742 | -0,527120334 | 0,2081817 | -2,532021 | 0,0113407 | 0,0388242 | OSBPL6   |
| ENSGALG00000011982 | 5512,8717 | -0,527666168 | 0,1403594 | -3,759392 | 0,0001703 | 0,0011941 | PDE5A    |
| ENSGALG00000011149 | 879,0742  | -0,527681437 | 0,1626198 | -3,244879 | 0,001175  | 0,0061037 | PLA2R1   |
| ENSGALG00000008096 | 6070,9895 | -0,528190931 | 0,1247684 | -4,233371 | 2,30E-05  | 0,0002114 | SUFU     |
| ENSGALG00000007140 | 3712,2899 | -0,528407251 | 0,1869729 | -2,826116 | 0,0047116 | 0,0190805 | NRP1     |
| ENSGALG00000008847 | 3493,1884 | -0,528756478 | 0,1263169 | -4,185952 | 2,84E-05  | 0,0002534 | VPS54    |
| ENSGALG00000013177 | 2545,0183 | -0,528877548 | 0,1412318 | -3,744749 | 0,0001806 | 0,0012537 | BCAT1    |
| ENSGALG00000017392 | 1036,5696 | -0,528892969 | 0,1585879 | -3,335014 | 0,000853  | 0,0046807 | SPDYA    |
| ENSGALG00000012979 | 10526,261 | -0,528975634 | 0,1480989 | -3,571772 | 0,0003546 | 0,0022422 | TRIO     |
| ENSGALG00000000208 | 3421,1766 | -0,529383362 | 0,1352035 | -3,915457 | 9,02E-05  | 0,0006871 | MCC      |
| ENSGALG00000004474 | 1133,2959 | -0,529777367 | 0,1534298 | -3,452897 | 0,0005546 | 0,0032709 | PLEKHF1  |
| ENSGALG00000013203 | 7478,1862 | -0,52983334  | 0,1163226 | -4,554862 | 5,24E-06  | 5,78E-05  | ELP2     |
| ENSGALG00000011419 | 3053,0195 | -0,529859697 | 0,123662  | -4,284741 | 1,83E-05  | 0,0001731 | DUSP4    |
| ENSGALG00000010159 | 4422,5959 | -0,529906457 | 0,122307  | -4,332595 | 1,47E-05  | 0,0001449 | SLC20A2  |
| ENSGALG00000002974 | 1015,7762 | -0,529999669 | 0,168327  | -3,148631 | 0,0016404 | 0,0080164 | SPHKAP   |
| ENSGALG00000002624 | 31172,832 | -0,530323004 | 0,1123984 | -4,718243 | 2,38E-06  | 2,82E-05  | BMS1     |
| ENSGALG00000006826 | 4092,1467 | -0,530661584 | 0,1454636 | -3,648071 | 0,0002642 | 0,0017378 | KLHL25   |
| ENSGALG00000002253 | 1425,4871 | -0,530784268 | 0,1456031 | -3,64542  | 0,000267  | 0,0017508 | HEMK1    |
| ENSGALG00000011569 | 5815,2909 | -0,530885029 | 0,12043   | -4,408246 | 1,04E-05  | 0,000107  | SCYL2    |
| ENSGALG00000003944 | 1246,484  | -0,531232705 | 0,1600895 | -3,318348 | 0,0009055 | 0,0049275 | FAM189A1 |
| ENSGALG00000004347 | 6495,1605 | -0,533321296 | 0,1103628 | -4,832435 | 1,35E-06  | 1,70E-05  | NEDD4    |
| ENSGALG00000006710 | 714,0564  | -0,533378082 | 0,1783936 | -2,989895 | 0,0027907 | 0,0124332 | RAB36    |
| ENSGALG00000000891 | 3716,0687 | -0,533422492 | 0,1230689 | -4,33434  | 1,46E-05  | 0,000144  | NSUN5    |
| ENSGALG00000015818 | 5198,5394 | -0,53353462  | 0,1266077 | -4,214076 | 2,51E-05  | 0,0002282 | E2F5     |
| ENSGALG00000015448 | 2486,2853 | -0,533672096 | 0,1639578 | -3,254936 | 0,0011342 | 0,0059369 | TOX      |
| ENSGALG00000008312 | 1844,0991 | -0,534378374 | 0,1384766 | -3,858978 | 0,0001139 | 0,0008371 | GSAP     |
| ENSGALG00000004506 | 11897,642 | -0,534405871 | 0,1101239 | -4,852769 | 1,22E-06  | 1,55E-05  | URI1     |
| ENSGALG00000013085 | 2436,8268 | -0,535478159 | 0,1366821 | -3,917689 | 8,94E-05  | 0,0006824 | PTPRO    |
| ENSGALG00000008098 | 5171,8512 | -0,536763264 | 0,1152605 | -4,656959 | 3,21E-06  | 3,70E-05  | NAMPT    |
| ENSGALG00000016024 | 730,05733 | -0,537143611 | 0,1775788 | -3,024818 | 0,0024878 | 0,0112763 | SETD4    |
| ENSGALG00000006856 | 8733,4208 | -0,537151634 | 0,1162633 | -4,62013  | 3,83E-06  | 4,35E-05  | CD151    |
| ENSGALG00000011024 | 13428,049 | -0,537183599 | 0,1048649 | -5,122625 | 3,01E-07  | 4,37E-06  | CACHD1   |
| ENSGALG00000010564 | 3014,7883 | -0,537373895 | 0,1233997 | -4,354741 | 1,33E-05  | 0,0001323 | TBCK     |
| ENSGALG00000015360 | 9022,7064 | -0,537653684 | 0,1055635 | -5,093178 | 3,52E-07  | 5,05E-06  | KIAA1524 |
| ENSGALG00000026253 | 1652,9426 | -0,5379573   | 0,1506081 | -3,571902 | 0,0003544 | 0,0022422 | TMEM144  |
| ENSGALG00000003705 | 3639,3367 | -0,538250704 | 0,1231851 | -4,369445 | 1,25E-05  | 0,0001252 | VPS13C   |
| ENSGALG00000012468 | 13779,95  | -0,538390713 | 0,1366618 | -3,939585 | 8,16E-05  | 0,0006293 | PRPF39   |
| ENSGALG00000016440 | 2000,29   | -0,538612864 | 0,1606177 | -3,353384 | 0,0007983 | 0,0044417 | KLF11    |
| ENSGALG00000016835 | 6008,9103 | -0,539714594 | 0,1468334 | -3,675694 | 0,0002372 | 0,0015823 | ATP11A   |
| ENSGALG00000009476 | 2384,795  | -0,539812489 | 0,1852255 | -2,914353 | 0,0035643 | 0,0152027 | CDK6     |
| ENSGALG00000002873 | 15190,766 | -0,539979366 | 0,10839   | -4,981821 | 6,30E-07  | 8,52E-06  | RSL1D1   |
| ENSGALG00000015701 | 9337,5788 | -0,540112853 | 0,1299709 | -4,155644 | 3,24E-05  | 0,0002838 | CXADR    |
| ENSGALG00000015180 | 15097,101 | -0,540189844 | 0,1129211 | -4,78378  | 1,72E-06  | 2,11E-05  | PSAT1    |
| ENSGALG00000001389 | 3052,2811 | -0,540945617 | 0,1260291 | -4,292227 | 1,77E-05  | 0,0001682 | TTLL11   |
| ENSGALG00000029022 | 1420,5998 | -0,540984923 | 0,2146447 | -2,520374 | 0,011723  | 0,0398623 | NPAS3    |
| ENSGALG00000015491 | 4074,1339 | -0,541085652 | 0,1219675 | -4,436312 | 9,15E-06  | 9,53E-05  | GPR89B   |
| ENSGALG00000012121 | 12053,922 | -0,541445831 | 0,1045431 | -5,179165 | 2,23E-07  | 3,34E-06  | RCN1     |
| ENSGALG00000023089 | 788,71726 | -0,541614618 | 0,1982755 | -2,731627 | 0,0063022 | 0,0242593 | SSBP2    |
| ENSGALG00000013438 | 21891,879 | -0,541667727 | 0,1120475 | -4,834271 | 1,34E-06  | 1,69E-05  | TEX10    |
| ENSGALG00000001957 | 8870,632  | -0,541703645 | 0,1341035 | -4,039444 | 5,36E-05  | 0,0004373 | ITCH     |
| ENSGALG00000016460 | 6190,6626 | -0,541890883 | 0,14842   | -3,651065 | 0,0002612 | 0,0017202 | NBAS     |
| ENSGALG00000014573 | 17671,905 | -0,541989088 | 0,1103445 | -4,911792 | 9,02E-07  | 1,18E-05  | NAT10    |
| ENSGALG00000025884 | 6669,8373 | -0,543082298 | 0,1134242 | -4,788063 | 1,68E-06  | 2,07E-05  | NABP1    |
| ENSGALG00000007835 | 1738,059  | -0,543517994 | 0,1483373 | -3,664068 | 0,0002482 | 0,0016487 | PUS10    |

|                    |           |              |           |           |           |           |          |
|--------------------|-----------|--------------|-----------|-----------|-----------|-----------|----------|
| ENSGALG00000006895 | 13372,527 | -0,543915173 | 0,1058888 | -5,136663 | 2,80E-07  | 4,09E-06  | CEP131   |
| ENSGALG00000004364 | 7914,9764 | -0,544307466 | 0,1156323 | -4,707225 | 2,51E-06  | 2,97E-05  | ABR      |
| ENSGALG00000014769 | 613,98427 | -0,544618003 | 0,20267   | -2,687216 | 0,007205  | 0,0270761 | NLN      |
| ENSGALG00000026452 | 7763,7201 | -0,545277299 | 0,1319298 | -4,133086 | 3,58E-05  | 0,0003098 | MURC     |
| ENSGALG00000008623 | 615,02509 | -0,545289509 | 0,1967721 | -2,771173 | 0,0055855 | 0,021976  | TOR4A    |
| ENSGALG00000012223 | 1554,6199 | -0,545359079 | 0,1399232 | -3,89756  | 9,72E-05  | 0,0007325 | ZRANB3   |
| ENSGALG00000004879 | 617,17052 | -0,545838008 | 0,1927673 | -2,831591 | 0,0046317 | 0,0187848 | SLC6A11  |
| ENSGALG00000004744 | 525,6252  | -0,546332008 | 0,1957015 | -2,791659 | 0,0052439 | 0,0208575 | DISP2    |
| ENSGALG00000003440 | 1101,0238 | -0,546469024 | 0,1603017 | -3,409004 | 0,000652  | 0,0037377 |          |
| ENSGALG00000011351 | 157820,47 | -0,547374715 | 0,1580098 | -3,464182 | 0,0005318 | 0,0031579 | HSP90AA1 |
| ENSGALG00000016768 | 7527,2287 | -0,54750013  | 0,11987   | -4,56745  | 4,94E-06  | 5,48E-05  | LONRF2   |
| ENSGALG00000012894 | 568,24499 | -0,54779071  | 0,2155009 | -2,541941 | 0,0110239 | 0,0380183 | CHRM2    |
| ENSGALG00000009503 | 5606,8039 | -0,547842813 | 0,1186519 | -4,617227 | 3,89E-06  | 4,41E-05  | RAB3GAP2 |
| ENSGALG00000015746 | 3303,5119 | -0,547863301 | 0,1403611 | -3,903241 | 9,49E-05  | 0,0007163 | JAM2     |
| ENSGALG00000003937 | 13547,502 | -0,548529686 | 0,130015  | -4,218972 | 2,45E-05  | 0,0002241 | GEMIN5   |
| ENSGALG00000005727 | 12274,551 | -0,548590838 | 0,1154072 | -4,753525 | 2,00E-06  | 2,41E-05  | SLC7A3   |
| ENSGALG00000017083 | 1252,4876 | -0,54907192  | 0,1596795 | -3,438588 | 0,0005848 | 0,003414  | KATNAL1  |
| ENSGALG00000006971 | 10409,679 | -0,549657911 | 0,1186418 | -4,63292  | 3,61E-06  | 4,12E-05  | CDK5RAP2 |
| ENSGALG00000003026 | 1987,5595 | -0,550107166 | 0,1687281 | -3,260317 | 0,0011129 | 0,0058389 | MKL2     |
| ENSGALG00000029127 | 622,20536 | -0,550279038 | 0,2169523 | -2,536406 | 0,0111997 | 0,0384768 |          |
| ENSGALG00000011400 | 12123,593 | -0,550294288 | 0,103122  | -5,336343 | 9,48E-08  | 1,53E-06  | USP44    |
| ENSGALG00000028501 | 7019,464  | -0,550742687 | 0,1179763 | -4,668248 | 3,04E-06  | 3,52E-05  | DCK      |
| ENSGALG00000013503 | 838,79916 | -0,551514976 | 0,1874586 | -2,942063 | 0,0032603 | 0,0140874 | FAM149A  |
| ENSGALG00000007097 | 2035,7636 | -0,551520351 | 0,1696313 | -3,25129  | 0,0011488 | 0,0059997 | RPS6KA6  |
| ENSGALG00000017006 | 4626,7368 | -0,551986159 | 0,1179626 | -4,679334 | 2,88E-06  | 3,35E-05  | SETDB2   |
| ENSGALG00000004071 | 3249,4429 | -0,552437495 | 0,123172  | -4,485092 | 7,29E-06  | 7,73E-05  | NETO2    |
| ENSGALG00000000684 | 3181,0431 | -0,552570682 | 0,1435454 | -3,849448 | 0,0001184 | 0,0008642 | KLHDC8A  |
| ENSGALG00000003835 | 27823,208 | -0,552761335 | 0,1061578 | -5,20698  | 1,92E-07  | 2,92E-06  | ATP2A2   |
| ENSGALG00000011052 | 797,4232  | -0,553217179 | 0,2034892 | -2,718657 | 0,0065548 | 0,0250612 | SLC38A11 |
| ENSGALG00000010309 | 346,20571 | -0,554430553 | 0,2211705 | -2,506801 | 0,0121829 | 0,0410672 | ZC2HC1C  |
| ENSGALG00000016883 | 3231,0954 | -0,555002491 | 0,1279098 | -4,339014 | 1,43E-05  | 0,0001413 | DOCK9    |
| ENSGALG00000004813 | 26912,189 | -0,555221474 | 0,117319  | -4,732578 | 2,22E-06  | 2,65E-05  | IARS     |
| ENSGALG00000005774 | 2418,9054 | -0,555555373 | 0,133361  | -4,165801 | 3,10E-05  | 0,0002736 | NKAIN4   |
| ENSGALG00000013635 | 10619,161 | -0,555662229 | 0,1221599 | -4,548648 | 5,40E-06  | 5,91E-05  | SCAF8    |
| ENSGALG00000016468 | 6793,0911 | -0,555855719 | 0,108947  | -5,102077 | 3,36E-07  | 4,84E-06  | GEN1     |
| ENSGALG00000026379 | 480,26073 | -0,557143449 | 0,1981326 | -2,811973 | 0,0049239 | 0,0198356 | OPRD1    |
| ENSGALG00000013430 | 2775,6809 | -0,557212283 | 0,1237629 | -4,502256 | 6,72E-06  | 7,16E-05  |          |
| ENSGALG00000021487 | 6790,2413 | -0,55890103  | 0,1279072 | -4,369583 | 1,24E-05  | 0,0001252 |          |
| ENSGALG00000016231 | 123947,5  | -0,55907395  | 0,1098338 | -5,09018  | 3,58E-07  | 5,11E-06  | DDX3X    |
| ENSGALG00000019178 | 3990,1334 | -0,559313492 | 0,1249859 | -4,475011 | 7,64E-06  | 8,08E-05  | PRDM15   |
| ENSGALG00000010022 | 5530,328  | -0,559381952 | 0,1189802 | -4,701473 | 2,58E-06  | 3,04E-05  | PRMT9    |
| ENSGALG00000011692 | 9047,4774 | -0,559417827 | 0,1160828 | -4,819127 | 1,44E-06  | 1,81E-05  | CDCA4    |
| ENSGALG00000017021 | 332,60369 | -0,55959631  | 0,2270786 | -2,464329 | 0,013727  | 0,045078  | ATP7B    |
| ENSGALG00000000447 | 760,9204  | -0,559669779 | 0,171256  | -3,268029 | 0,001083  | 0,0057107 | KCNA3    |
| ENSGALG00000011541 | 6975,1988 | -0,559795067 | 0,1404905 | -3,984576 | 6,76E-05  | 0,0005331 | BIN1     |
| ENSGALG00000003510 | 5135,2375 | -0,562160497 | 0,117815  | -4,771553 | 1,83E-06  | 2,23E-05  | UCK2     |
| ENSGALG00000012508 | 4886,2726 | -0,562203872 | 0,114843  | -4,895414 | 9,81E-07  | 1,28E-05  | TRIP13   |
| ENSGALG00000027231 | 9354,1487 | -0,562988244 | 0,1537161 | -3,66252  | 0,0002497 | 0,0016558 | NRARP    |
| ENSGALG00000016897 | 2920,7661 | -0,563110321 | 0,1234746 | -4,560535 | 5,10E-06  | 5,64E-05  | GPR180   |
| ENSGALG00000010081 | 2535,9184 | -0,563235953 | 0,1656002 | -3,401179 | 0,000671  | 0,0038367 | SH3D19   |
| ENSGALG00000003074 | 3831,5986 | -0,563796907 | 0,1286586 | -4,382116 | 1,18E-05  | 0,0001188 | HOMER3   |
| ENSGALG00000012256 | 15406,505 | -0,563809375 | 0,163288  | -3,452852 | 0,0005547 | 0,0032709 | UTRN     |
| ENSGALG00000026438 | 2075,6069 | -0,563826313 | 0,1305634 | -4,318409 | 1,57E-05  | 0,0001522 |          |
| ENSGALG00000008132 | 7657,4934 | -0,564518166 | 0,1163041 | -4,853812 | 1,21E-06  | 1,55E-05  | PUS7     |
| ENSGALG00000013641 | 530,0064  | -0,565215365 | 0,2025498 | -2,790501 | 0,0052627 | 0,0209261 | MTMR7    |
| ENSGALG00000026583 | 481,9172  | -0,565402739 | 0,219019  | -2,581523 | 0,0098365 | 0,0347405 |          |
| ENSGALG00000022808 | 24156,793 | -0,565497585 | 0,1052406 | -5,373379 | 7,73E-08  | 1,27E-06  | RRP1B    |
| ENSGALG00000011228 | 7018,8875 | -0,565699287 | 0,1248478 | -4,53111  | 5,87E-06  | 6,35E-05  | WARS     |
| ENSGALG00000002623 | 550,49256 | -0,566538314 | 0,1922408 | -2,947024 | 0,0032085 | 0,0139164 | PCOLCE2  |
| ENSGALG00000014940 | 2607,3053 | -0,566659105 | 0,1584762 | -3,575674 | 0,0003493 | 0,0022157 | ZUFSP    |
| ENSGALG00000016917 | 1018,5023 | -0,567495374 | 0,1648915 | -3,441629 | 0,0005782 | 0,0033831 | CLN5     |
| ENSGALG00000015431 | 2610,4581 | -0,567537408 | 0,1279963 | -4,434014 | 9,25E-06  | 9,61E-05  | UBXN2B   |



|                    |           |              |           |           |           |           |              |
|--------------------|-----------|--------------|-----------|-----------|-----------|-----------|--------------|
| ENSGALG00000009855 | 7273,6535 | -0,567662024 | 0,1223057 | -4,641336 | 3,46E-06  | 3,97E-05  | TBC1D9       |
| ENSGALG00000017079 | 12990,655 | -0,56791639  | 0,124822  | -4,549812 | 5,37E-06  | 5,89E-05  | USPL1        |
| ENSGALG00000000195 | 1824,66   | -0,568283448 | 0,1600789 | -3,55002  | 0,0003852 | 0,0024013 | SLC23A2      |
| ENSGALG00000003906 | 12475,038 | -0,568387401 | 0,109475  | -5,191937 | 2,08E-07  | 3,14E-06  | MPHOSPH10    |
| ENSGALG00000016281 | 11421,229 | -0,569360911 | 0,1081146 | -5,266272 | 1,39E-07  | 2,17E-06  | DMD          |
| ENSGALG00000016391 | 2197,6068 | -0,569812042 | 0,1354173 | -4,207823 | 2,58E-05  | 0,0002336 | CNKS2        |
| ENSGALG00000015142 | 3202,1058 | -0,570285644 | 0,1334226 | -4,27428  | 1,92E-05  | 0,0001807 | DSG2         |
| ENSGALG00000009714 | 1150,5594 | -0,570305895 | 0,1555825 | -3,665616 | 0,0002467 | 0,0016411 | CBR4         |
| ENSGALG00000014783 | 10636,1   | -0,572122303 | 0,1261051 | -4,53687  | 5,71E-06  | 6,20E-05  | PTPRK        |
| ENSGALG00000016910 | 23108,199 | -0,572230903 | 0,1116391 | -5,125723 | 2,96E-07  | 4,30E-06  | RBM26        |
| ENSGALG00000012849 | 5113,4695 | -0,57279907  | 0,1488538 | -3,848064 | 0,0001191 | 0,0008677 | SLC37A3      |
| ENSGALG00000001363 | 21664,352 | -0,573517858 | 0,1098878 | -5,219123 | 1,80E-07  | 2,75E-06  | MYBBP1A      |
| ENSGALG00000003180 | 15412,658 | -0,573999724 | 0,1081856 | -5,305695 | 1,12E-07  | 1,78E-06  | TSR1         |
| ENSGALG00000013031 | 1094,9404 | -0,574014118 | 0,173605  | -3,306438 | 0,0009449 | 0,0051051 | CECR1        |
| ENSGALG00000010035 | 2145,4649 | -0,574430705 | 0,1965144 | -2,923098 | 0,0034657 | 0,0148241 | NR3C2        |
| ENSGALG00000016807 | 10081,673 | -0,574724846 | 0,1138634 | -5,047493 | 4,48E-07  | 6,28E-06  | LIMS1        |
| ENSGALG00000016841 | 10674,737 | -0,576008454 | 0,1276781 | -4,511411 | 6,44E-06  | 6,90E-05  | COL4A1       |
| ENSGALG00000020057 | 1737,427  | -0,576621955 | 0,1365122 | -4,223958 | 2,40E-05  | 0,0002196 | PIGF         |
| ENSGALG00000007992 | 6680,6643 | -0,5769061   | 0,1093351 | -5,276494 | 1,32E-07  | 2,06E-06  | GGA3         |
| ENSGALG00000003591 | 1041,8529 | -0,577610116 | 0,1793022 | -3,221433 | 0,0012755 | 0,006536  | FTO          |
| ENSGALG00000014939 | 2493,3187 | -0,579384653 | 0,1743511 | -3,323091 | 0,0008903 | 0,004862  | GFM2         |
| ENSGALG00000004612 | 6633,1212 | -0,579433401 | 0,1094771 | -5,292734 | 1,21E-07  | 1,90E-06  | MTHFR        |
| ENSGALG00000007008 | 8124,263  | -0,579649516 | 0,117537  | -4,931634 | 8,15E-07  | 1,08E-05  | POLR3E       |
| ENSGALG00000004140 | 1503,5608 | -0,579940212 | 0,1679604 | -3,452839 | 0,0005547 | 0,0032709 | SH3BP4       |
| ENSGALG00000015629 | 16787,85  | -0,581629702 | 0,1013849 | -5,736848 | 9,65E-09  | 1,91E-07  | TRAM1        |
| ENSGALG00000010202 | 1508,6027 | -0,581722546 | 0,1688428 | -3,445349 | 0,0005703 | 0,0033455 | ENTPD5       |
| ENSGALG00000006713 | 2292,8924 | -0,58181715  | 0,1450076 | -4,012322 | 6,01E-05  | 0,0004821 | CELF2        |
| ENSGALG00000011464 | 79055,793 | -0,582311331 | 0,1058239 | -5,502646 | 3,74E-08  | 6,56E-07  | EIF5         |
| ENSGALG00000017130 | 3473,8029 | -0,582570563 | 0,1291633 | -4,510341 | 6,47E-06  | 6,91E-05  | LATS2        |
| ENSGALG00000008288 | 656,98572 | -0,582969807 | 0,1906368 | -3,058013 | 0,0022281 | 0,0103145 | ARMC10       |
| ENSGALG00000015000 | 15510,253 | -0,584898632 | 0,104418  | -5,601509 | 2,12E-08  | 3,93E-07  | LYAR         |
| ENSGALG00000020899 | 644,11569 | -0,585391733 | 0,1791404 | -3,267782 | 0,0010839 | 0,0057134 |              |
| ENSGALG00000027517 | 979,67929 | -0,585667855 | 0,1639516 | -3,5722   | 0,000354  | 0,0022407 | gga-mir-3064 |
| ENSGALG00000007677 | 1856,8714 | -0,585818002 | 0,1452003 | -4,03455  | 5,47E-05  | 0,0004451 | THNSL1       |
| ENSGALG00000003426 | 1636,1649 | -0,587203746 | 0,1565835 | -3,750099 | 0,0001768 | 0,0012329 | RHBDL3       |
| ENSGALG00000015765 | 12998,254 | -0,587270267 | 0,1455632 | -4,034469 | 5,47E-05  | 0,0004451 | POLR1A       |
| ENSGALG00000015310 | 4463,7435 | -0,587354563 | 0,1636253 | -3,589632 | 0,0003311 | 0,0021177 | SOBP         |
| ENSGALG00000008263 | 616,84886 | -0,587476931 | 0,2027246 | -2,897907 | 0,0037566 | 0,0158984 | CNTN4        |
| ENSGALG00000004144 | 27007,859 | -0,588131949 | 0,109754  | -5,358638 | 8,39E-08  | 1,37E-06  | DDX50        |
| ENSGALG00000012946 | 11580,052 | -0,588849778 | 0,1146976 | -5,133933 | 2,84E-07  | 4,13E-06  | FAM60A       |
| ENSGALG00000016187 | 8513,8325 | -0,588903063 | 0,112954  | -5,213653 | 1,85E-07  | 2,82E-06  | WDR4         |
| ENSGALG00000000284 | 7651,6591 | -0,589684267 | 0,1227001 | -4,8059   | 1,54E-06  | 1,92E-05  | HOXB4        |
| ENSGALG00000025668 | 302,68906 | -0,590006716 | 0,2416858 | -2,441214 | 0,014638  | 0,0474627 |              |
| ENSGALG00000015556 | 4802,1991 | -0,591646833 | 0,1279382 | -4,624475 | 3,76E-06  | 4,27E-05  | AFAP1        |
| ENSGALG00000012147 | 18627,042 | -0,591734529 | 0,112588  | -5,255749 | 1,47E-07  | 2,30E-06  | DDX18        |
| ENSGALG00000008376 | 8424,8255 | -0,592197559 | 0,1214407 | -4,876433 | 1,08E-06  | 1,40E-05  | EIF2B5       |
| ENSGALG00000005803 | 3271,7652 | -0,592808251 | 0,1582098 | -3,746976 | 0,000179  | 0,0012457 | ZNRF3        |
| ENSGALG00000002326 | 890,06973 | -0,593338649 | 0,1837643 | -3,228802 | 0,0012431 | 0,0064011 |              |
| ENSGALG00000028863 | 286,98407 | -0,594135525 | 0,2453357 | -2,421725 | 0,015447  | 0,049555  |              |
| ENSGALG00000011449 | 1934,5212 | -0,594721435 | 0,1428135 | -4,164321 | 3,12E-05  | 0,000275  |              |
| ENSGALG00000007536 | 1357,1535 | -0,59551277  | 0,156731  | -3,799585 | 0,0001449 | 0,0010337 |              |
| ENSGALG00000007048 | 584,57505 | -0,595618933 | 0,2088367 | -2,85208  | 0,0043434 | 0,0178334 | SYNM         |
| ENSGALG00000005692 | 514,92687 | -0,595884023 | 0,2256362 | -2,640906 | 0,0082685 | 0,0302134 | CRISPLD2     |
| ENSGALG00000014213 | 4954,5042 | -0,596053951 | 0,129599  | -4,599216 | 4,24E-06  | 4,76E-05  | PRR5         |
| ENSGALG00000009458 | 5058,5683 | -0,596085417 | 0,1247109 | -4,779738 | 1,76E-06  | 2,15E-05  |              |
| ENSGALG00000005171 | 1357,2271 | -0,597406416 | 0,14458   | -4,132013 | 3,60E-05  | 0,0003107 | AP1S3        |
| ENSGALG00000005243 | 13547,504 | -0,597738338 | 0,1028436 | -5,812113 | 6,17E-09  | 1,27E-07  | PPP3CB       |
| ENSGALG00000020438 | 1854,2018 | -0,597817303 | 0,1402495 | -4,262527 | 2,02E-05  | 0,0001893 |              |
| ENSGALG00000027159 | 3433,7581 | -0,598718251 | 0,1676492 | -3,571256 | 0,0003553 | 0,0022435 | CNKS3        |
| ENSGALG00000014615 | 13865,336 | -0,598774766 | 0,1450012 | -4,129446 | 3,64E-05  | 0,0003134 | LAMA1        |
| ENSGALG00000011210 | 4763,2532 | -0,598839459 | 0,1129355 | -5,302492 | 1,14E-07  | 1,81E-06  | FAM175A      |
| ENSGALG00000020003 | 15165,061 | -0,59891041  | 0,1111234 | -5,389599 | 7,06E-08  | 1,17E-06  | MAP3K4       |

|                    |           |              |           |           |           |           |          |
|--------------------|-----------|--------------|-----------|-----------|-----------|-----------|----------|
| ENSGALG00000015409 | 17031,867 | -0,599227418 | 0,1473812 | -4,065834 | 4,79E-05  | 0,0003956 | PROS1    |
| ENSGALG00000011710 | 2961,6307 | -0,599591029 | 0,1881948 | -3,186013 | 0,0014425 | 0,007223  | BTBD6    |
| ENSGALG00000009437 | 2415,945  | -0,59959234  | 0,2125339 | -2,821161 | 0,004785  | 0,0193375 | MECOM    |
| ENSGALG00000001003 | 4385,7574 | -0,600081977 | 0,1214895 | -4,939372 | 7,84E-07  | 1,04E-05  | SEPN1    |
| ENSGALG00000006256 | 7733,3335 | -0,600800071 | 0,1126462 | -5,333512 | 9,63E-08  | 1,55E-06  | MAP7D3   |
| ENSGALG00000003110 | 375,89024 | -0,601903021 | 0,2441478 | -2,465322 | 0,013689  | 0,044964  |          |
| ENSGALG00000011280 | 7822,1495 | -0,603497491 | 0,1227685 | -4,915737 | 8,84E-07  | 1,16E-05  | EEA1     |
| ENSGALG00000010603 | 12309,752 | -0,604746743 | 0,1082631 | -5,585897 | 2,32E-08  | 4,26E-07  | CEBPZ    |
| ENSGALG00000005807 | 96623,567 | -0,604834873 | 0,1046771 | -5,778103 | 7,55E-09  | 1,52E-07  | IPO7     |
| ENSGALG00000007030 | 1042,0347 | -0,605544059 | 0,1602843 | -3,777937 | 0,0001581 | 0,0011161 |          |
| ENSGALG00000010623 | 6764,8612 | -0,606701235 | 0,111882  | -5,422691 | 5,87E-08  | 9,92E-07  | ORC1     |
| ENSGALG00000006147 | 7732,277  | -0,607224855 | 0,1099367 | -5,523405 | 3,32E-08  | 5,88E-07  | NUCB2    |
| ENSGALG00000009348 | 14314,788 | -0,607303929 | 0,150627  | -4,031839 | 5,53E-05  | 0,0004496 | AKAP9    |
| ENSGALG00000011522 | 2524,7796 | -0,607850232 | 0,1342636 | -4,527291 | 5,97E-06  | 6,44E-05  | TRMT61A  |
| ENSGALG00000012407 | 335,57386 | -0,607964974 | 0,2234167 | -2,721215 | 0,0065042 | 0,02491   | LRP1B    |
| ENSGALG00000010538 | 11960,175 | -0,60879058  | 0,1100325 | -5,532827 | 3,15E-08  | 5,61E-07  | TTC27    |
| ENSGALG00000011618 | 1230,2077 | -0,609057453 | 0,1895822 | -3,21263  | 0,0013153 | 0,0067043 | ADSSL1   |
| ENSGALG00000015689 | 13523,347 | -0,609077567 | 0,14383   | -4,234705 | 2,29E-05  | 0,0002105 | KIAA0368 |
| ENSGALG00000005492 | 6703,9725 | -0,609713298 | 0,1420841 | -4,291213 | 1,78E-05  | 0,0001688 | NBEAL2   |
| ENSGALG00000009698 | 6354,4127 | -0,610790424 | 0,1589015 | -3,843831 | 0,0001211 | 0,0008818 | SLC38A1  |
| ENSGALG00000016302 | 7538,4329 | -0,61104581  | 0,1423529 | -4,292472 | 1,77E-05  | 0,0001681 | ASAP1    |
| ENSGALG00000000769 | 395,02523 | -0,611277614 | 0,2259769 | -2,705045 | 0,0068295 | 0,0258936 | RAB7B    |
| ENSGALG00000000438 | 3178,9721 | -0,61235395  | 0,1445774 | -4,235475 | 2,28E-05  | 0,0002099 | ERMP1    |
| ENSGALG00000010607 | 463,53756 | -0,613528032 | 0,2050464 | -2,992142 | 0,0027703 | 0,0123558 | SPATA7   |
| ENSGALG00000004169 | 13748,93  | -0,613558741 | 0,1070672 | -5,730594 | 1,00E-08  | 1,97E-07  |          |
| ENSGALG00000013760 | 3088,0215 | -0,614432788 | 0,1210707 | -5,07499  | 3,88E-07  | 5,50E-06  | GFPT2    |
| ENSGALG00000016574 | 1715,0637 | -0,614768808 | 0,142039  | -4,328168 | 1,50E-05  | 0,0001471 | GEMIN8   |
| ENSGALG00000007703 | 1248,9929 | -0,614958252 | 0,1535298 | -4,005464 | 6,19E-05  | 0,0004943 |          |
| ENSGALG00000013480 | 4896,2242 | -0,615680556 | 0,1242349 | -4,955777 | 7,20E-07  | 9,61E-06  | MTHFD2   |
| ENSGALG00000016808 | 40422,889 | -0,615970468 | 0,1230783 | -5,004705 | 5,59E-07  | 7,68E-06  | RANBP2   |
| ENSGALG00000006237 | 12767,815 | -0,616678741 | 0,1272849 | -4,844871 | 1,27E-06  | 1,61E-05  | PKN2     |
| ENSGALG00000016951 | 1808,556  | -0,617422601 | 0,1357822 | -4,547156 | 5,44E-06  | 5,94E-05  | MTRF1    |
| ENSGALG00000007631 | 328,24576 | -0,617881783 | 0,2272908 | -2,718464 | 0,0065586 | 0,0250618 | MEGF11   |
| ENSGALG00000028279 | 367,51739 | -0,618647245 | 0,2374707 | -2,605152 | 0,0091834 | 0,0327994 |          |
| ENSGALG00000008265 | 23793,57  | -0,619236444 | 0,1097973 | -5,639813 | 1,70E-08  | 3,22E-07  | PDCD11   |
| ENSGALG00000017388 | 6991,3984 | -0,619582917 | 0,1159517 | -5,343459 | 9,12E-08  | 1,48E-06  | YY1      |
| ENSGALG00000005815 | 11029,748 | -0,619938317 | 0,1099084 | -5,640501 | 1,70E-08  | 3,22E-07  | TMEM41B  |
| ENSGALG00000012533 | 37098,602 | -0,619977689 | 0,143535  | -4,31935  | 1,56E-05  | 0,0001518 | MYH9     |
| ENSGALG00000001192 | 22737,825 | -0,620466491 | 0,1546499 | -4,012072 | 6,02E-05  | 0,0004822 | ARHGAP32 |
| ENSGALG00000011058 | 317,84832 | -0,620682204 | 0,234088  | -2,651491 | 0,0080137 | 0,0294645 | LEPR     |
| ENSGALG00000016653 | 1523,2789 | -0,621295808 | 0,1474254 | -4,214308 | 2,51E-05  | 0,0002282 | FAM167A  |
| ENSGALG00000012447 | 5839,1863 | -0,62156312  | 0,1278297 | -4,862432 | 1,16E-06  | 1,49E-05  | TNS3     |
| ENSGALG00000005319 | 350,2389  | -0,621682491 | 0,2536246 | -2,451192 | 0,0142384 | 0,0464103 | CDH8     |
| ENSGALG00000008539 | 7630,1458 | -0,622137491 | 0,1211519 | -5,135185 | 2,82E-07  | 4,11E-06  | ALG12    |
| ENSGALG00000023419 | 9218,5287 | -0,622730836 | 0,1310534 | -4,751733 | 2,02E-06  | 2,42E-05  | HOXD4    |
| ENSGALG00000015271 | 532,65573 | -0,623845538 | 0,2308973 | -2,701831 | 0,0068959 | 0,0260871 | FILIP1L  |
| ENSGALG00000000234 | 2924,3601 | -0,623968223 | 0,1484686 | -4,202696 | 2,64E-05  | 0,0002381 | EPB41L4A |
| ENSGALG00000005438 | 938,76871 | -0,624083264 | 0,1616022 | -3,861849 | 0,0001125 | 0,0008286 | PARVA    |
| ENSGALG00000010975 | 6618,9998 | -0,624280901 | 0,1157101 | -5,395213 | 6,84E-08  | 1,14E-06  | TMTC2    |
| ENSGALG00000005504 | 1081,6574 | -0,624552568 | 0,1731409 | -3,607192 | 0,0003095 | 0,0019954 | HNF1B    |
| ENSGALG00000006609 | 9375,2554 | -0,624834648 | 0,1373671 | -4,548649 | 5,40E-06  | 5,91E-05  | EPHB1    |
| ENSGALG00000014860 | 10686,581 | -0,625239897 | 0,107074  | -5,839324 | 5,24E-09  | 1,09E-07  | YES1     |
| ENSGALG00000017159 | 5806,6713 | -0,626252438 | 0,142901  | -4,382421 | 1,17E-05  | 0,0001187 | ATM      |
| ENSGALG00000004046 | 1117,4696 | -0,627070394 | 0,169937  | -3,690016 | 0,0002242 | 0,0015092 | LARP6    |
| ENSGALG00000014855 | 4504,1501 | -0,627700184 | 0,1611556 | -3,894995 | 9,82E-05  | 0,0007383 | GHR      |
| ENSGALG00000010702 | 11951,045 | -0,628390454 | 0,1083577 | -5,799225 | 6,66E-09  | 1,36E-07  | ADSS     |
| ENSGALG00000015472 | 37144,636 | -0,629536006 | 0,1475373 | -4,266963 | 1,98E-05  | 0,000186  | CHD7     |
| ENSGALG00000012966 | 5358,7576 | -0,62976328  | 0,1160975 | -5,424435 | 5,81E-08  | 9,83E-07  | ZBTB2    |
| ENSGALG00000005450 | 5500,7304 | -0,632586778 | 0,1208381 | -5,234993 | 1,65E-07  | 2,54E-06  | CCDC66   |
| ENSGALG00000005256 | 11273,337 | -0,63393871  | 0,1641492 | -3,861966 | 0,0001125 | 0,0008286 | EPHA4    |
| ENSGALG00000014337 | 1369,7017 | -0,634337238 | 0,1462286 | -4,337984 | 1,44E-05  | 0,0001418 | NWD2     |
| ENSGALG00000009850 | 11171,857 | -0,63459607  | 0,108041  | -5,87366  | 4,26E-09  | 9,11E-08  | NOVA1    |

|                    |           |              |           |           |           |           |             |
|--------------------|-----------|--------------|-----------|-----------|-----------|-----------|-------------|
| ENSGALG00000004937 | 10776,497 | -0,634904509 | 0,1095156 | -5,797386 | 6,74E-09  | 1,37E-07  | VGLL4       |
| ENSGALG00000017368 | 7609,7868 | -0,635358308 | 0,1095099 | -5,801832 | 6,56E-09  | 1,34E-07  | TRNT1       |
| ENSGALG00000007392 | 3781,9294 | -0,635704603 | 0,1408897 | -4,512074 | 6,42E-06  | 6,88E-05  | ADAMTS9     |
| ENSGALG00000003767 | 4407,983  | -0,636798593 | 0,1177151 | -5,409657 | 6,31E-08  | 1,06E-06  | NKD1        |
| ENSGALG00000007710 | 1737,5833 | -0,637223247 | 0,1525396 | -4,177427 | 2,95E-05  | 0,0002612 |             |
| ENSGALG00000012813 | 15846,526 | -0,637913408 | 0,1220106 | -5,228345 | 1,71E-07  | 2,63E-06  | PRPF4B      |
| ENSGALG00000005521 | 7067,2749 | -0,637995859 | 0,1317048 | -4,844135 | 1,27E-06  | 1,62E-05  | PER2        |
| ENSGALG00000022490 | 838,24845 | -0,638026939 | 0,2048258 | -3,114973 | 0,0018396 | 0,008782  | ARPC1B      |
| ENSGALG00000023451 | 10451,614 | -0,638494594 | 0,1052822 | -6,064604 | 1,32E-09  | 3,09E-08  | TRPM7       |
| ENSGALG00000007056 | 3476,5095 | -0,638790551 | 0,1810296 | -3,528652 | 0,0004177 | 0,0025816 | KLF6        |
| ENSGALG00000003891 | 23052,983 | -0,638963678 | 0,1001377 | -6,380853 | 1,76E-10  | 4,67E-09  | ZNF423      |
| ENSGALG00000008304 | 1332,9115 | -0,639371492 | 0,2087659 | -3,062623 | 0,0021941 | 0,0101883 | OBFC1       |
| ENSGALG00000012662 | 3593,3785 | -0,639523486 | 0,1240921 | -5,153618 | 2,56E-07  | 3,78E-06  | NUAK1       |
| ENSGALG00000014138 | 4048,403  | -0,640267154 | 0,1406798 | -4,551239 | 5,33E-06  | 5,86E-05  | NFXL1       |
| ENSGALG00000011162 | 1836,7364 | -0,640538648 | 0,1515623 | -4,226239 | 2,38E-05  | 0,0002177 | CYP46A1     |
| ENSGALG00000021238 | 337,09341 | -0,640934901 | 0,2252878 | -2,84496  | 0,0044417 | 0,0181603 | CYP2W1      |
| ENSGALG00000009240 | 3768,4908 | -0,641416186 | 0,1167026 | -5,49616  | 3,88E-08  | 6,79E-07  | NFE2L2      |
| ENSGALG00000007352 | 21915,639 | -0,641667347 | 0,1092352 | -5,874181 | 4,25E-09  | 9,10E-08  | SPAG9       |
| ENSGALG00000009445 | 3221,2949 | -0,642383978 | 0,1226543 | -5,237353 | 1,63E-07  | 2,51E-06  | INPP5F      |
| ENSGALG00000010642 | 1388,2464 | -0,643267076 | 0,1679801 | -3,829424 | 0,0001284 | 0,0009312 | IRF2        |
| ENSGALG00000027704 | 758,7446  | -0,643979597 | 0,2120706 | -3,036628 | 0,0023924 | 0,0109231 |             |
| ENSGALG00000005321 | 14326,683 | -0,645095033 | 0,1462871 | -4,409787 | 1,03E-05  | 0,0001064 | LAMA5       |
| ENSGALG00000005024 | 4274,063  | -0,645541534 | 0,1373988 | -4,698306 | 2,62E-06  | 3,09E-05  | EFCC1       |
| ENSGALG00000026181 | 1587,8742 | -0,645581251 | 0,1576569 | -4,094848 | 4,22E-05  | 0,0003559 | STRIP2      |
| ENSGALG00000010536 | 11449,034 | -0,646034394 | 0,1106982 | -5,835997 | 5,35E-09  | 1,11E-07  | FAF1        |
| ENSGALG00000016480 | 10063,583 | -0,647091328 | 0,1222876 | -5,291552 | 1,21E-07  | 1,91E-06  | SDC1        |
| ENSGALG00000000258 | 23273,697 | -0,649481888 | 0,1229147 | -5,284004 | 1,26E-07  | 1,98E-06  | HEATR1      |
| ENSGALG00000000761 | 2678,9011 | -0,649687901 | 0,1320076 | -4,921596 | 8,58E-07  | 1,13E-05  | TSKU        |
| ENSGALG00000014902 | 5870,3239 | -0,650325285 | 0,1293417 | -5,027965 | 4,96E-07  | 6,90E-06  | RP1-179P9.3 |
| ENSGALG00000012847 | 300,13784 | -0,651077536 | 0,259355  | -2,510372 | 0,0120604 | 0,0407551 |             |
| ENSGALG00000006864 | 655,13638 | -0,651213169 | 0,1997356 | -3,260377 | 0,0011126 | 0,0058389 | COL24A1     |
| ENSGALG00000014873 | 10860,594 | -0,6514166   | 0,1060541 | -6,142302 | 8,13E-10  | 1,95E-08  | GJA1        |
| ENSGALG00000012232 | 769,02109 | -0,652989979 | 0,197777  | -3,301647 | 0,0009612 | 0,0051726 | DNAAF2      |
| ENSGALG00000003154 | 3509,1767 | -0,653496705 | 0,122188  | -5,348291 | 8,88E-08  | 1,45E-06  | TXNDC11     |
| ENSGALG00000005845 | 8323,5942 | -0,655210424 | 0,124744  | -5,252442 | 1,50E-07  | 2,33E-06  | SLC7A5      |
| ENSGALG00000015241 | 1466,0595 | -0,655397927 | 0,141762  | -4,623228 | 3,78E-06  | 4,29E-05  | SNAI2       |
| ENSGALG00000015653 | 733,01948 | -0,655959247 | 0,2027357 | -3,235538 | 0,0012141 | 0,0062782 | JPH1        |
| ENSGALG00000016681 | 817,92363 | -0,656368052 | 0,1696389 | -3,869207 | 0,0001092 | 0,0008088 | DHR SX      |
| ENSGALG00000000690 | 5466,0012 | -0,657633862 | 0,1415168 | -4,647039 | 3,37E-06  | 3,87E-05  | GDPD4       |
| ENSGALG00000016817 | 6729,2541 | -0,658902643 | 0,1108429 | -5,944473 | 2,77E-09  | 6,16E-08  | RASA3       |
| ENSGALG00000006975 | 7158,0796 | -0,659116429 | 0,117355  | -5,616432 | 1,95E-08  | 3,65E-07  | TBC1D22A    |
| ENSGALG00000006840 | 2751,6848 | -0,659559733 | 0,1711898 | -3,852798 | 0,0001168 | 0,0008552 | AKAP13      |
| ENSGALG00000006681 | 619,27869 | -0,660452265 | 0,2149441 | -3,07267  | 0,0021215 | 0,009926  | BR SK2      |
| ENSGALG00000010204 | 972,3601  | -0,660708753 | 0,1680654 | -3,93126  | 8,45E-05  | 0,0006489 | KCNC2       |
| ENSGALG00000008551 | 7057,1759 | -0,661341847 | 0,1249566 | -5,292574 | 1,21E-07  | 1,90E-06  | CRELD2      |
| ENSGALG00000007870 | 12818,558 | -0,66197661  | 0,1166502 | -5,674884 | 1,39E-08  | 2,68E-07  | SMAD3       |
| ENSGALG00000001405 | 334,6643  | -0,663151012 | 0,2350856 | -2,820891 | 0,004789  | 0,019348  | IRF6        |
| ENSGALG00000005796 | 13227,627 | -0,664735985 | 0,1063503 | -6,25044  | 4,09E-10  | 1,01E-08  | XBP1        |
| ENSGALG00000008293 | 829,33594 | -0,66560113  | 0,2005473 | -3,318924 | 0,0009036 | 0,0049193 | SH3PXD2A    |
| ENSGALG00000016246 | 560,38544 | -0,667393695 | 0,2438472 | -2,736934 | 0,0062015 | 0,0239052 | KCNQ3       |
| ENSGALG00000009915 | 13723,099 | -0,66741216  | 0,1151588 | -5,79558  | 6,81E-09  | 1,39E-07  | EML4        |
| ENSGALG00000005512 | 8645,0111 | -0,667653797 | 0,1184896 | -5,634703 | 1,75E-08  | 3,31E-07  | KIAA1671    |
| ENSGALG00000008418 | 2809,2517 | -0,668553187 | 0,1227062 | -5,448405 | 5,08E-08  | 8,65E-07  | GYLTL1B     |
| ENSGALG00000011139 | 4725,8286 | -0,66929694  | 0,1340022 | -4,99467  | 5,89E-07  | 8,03E-06  | CCDC85C     |
| ENSGALG00000011686 | 12938,733 | -0,670528172 | 0,1470322 | -4,560417 | 5,11E-06  | 5,64E-05  | SEMA5B      |
| ENSGALG00000007278 | 350,13209 | -0,670809216 | 0,2308902 | -2,905317 | 0,0036688 | 0,0155756 | GRIN2A      |
| ENSGALG00000008240 | 2340,2977 | -0,670953542 | 0,1295685 | -5,178368 | 2,24E-07  | 3,35E-06  | CFLAR       |
| ENSGALG00000006080 | 30589,303 | -0,672288685 | 0,1018389 | -6,601491 | 4,07E-11  | 1,17E-09  | GPC4        |
| ENSGALG00000028291 | 15611,072 | -0,672824764 | 0,1341958 | -5,013756 | 5,34E-07  | 7,39E-06  | BCAR1       |
| ENSGALG00000004715 | 1867,9414 | -0,672888292 | 0,1525035 | -4,41228  | 1,02E-05  | 0,0001053 | ZC3H12B     |
| ENSGALG00000015912 | 3388,0589 | -0,674238434 | 0,1460392 | -4,616833 | 3,90E-06  | 4,41E-05  | NBN         |
| ENSGALG00000015708 | 22628,562 | -0,674375402 | 0,1784895 | -3,778235 | 0,0001579 | 0,0011154 | FGFR3       |

|                    |           |              |           |           |           |           |          |
|--------------------|-----------|--------------|-----------|-----------|-----------|-----------|----------|
| ENSGALG00000008684 | 70609,009 | -0,674536207 | 0,1288068 | -5,236804 | 1,63E-07  | 2,52E-06  | EIF4A2   |
| ENSGALG00000010049 | 749,198   | -0,6748978   | 0,2082509 | -3,240792 | 0,001192  | 0,0061824 | PTPRB    |
| ENSGALG00000003249 | 7468,8212 | -0,675105103 | 0,1116673 | -6,045684 | 1,49E-09  | 3,45E-08  | CWF19L1  |
| ENSGALG00000006035 | 6729,7716 | -0,676290578 | 0,1083357 | -6,242548 | 4,30E-10  | 1,06E-08  | PDE3B    |
| ENSGALG00000004494 | 4756,9197 | -0,676838081 | 0,11958   | -5,66013  | 1,51E-08  | 2,89E-07  | CCNE1    |
| ENSGALG00000016451 | 7945,9007 | -0,679900325 | 0,139439  | -4,87597  | 1,08E-06  | 1,40E-05  | ROCK2    |
| ENSGALG00000025674 | 227,33639 | -0,681326883 | 0,2807179 | -2,427088 | 0,0152206 | 0,0489092 |          |
| ENSGALG00000006437 | 3771,9905 | -0,682364759 | 0,1217534 | -5,60448  | 2,09E-08  | 3,87E-07  | NOM1     |
| ENSGALG00000009156 | 5048,9849 | -0,682556058 | 0,1676146 | -4,072176 | 4,66E-05  | 0,0003862 | CDAN1    |
| ENSGALG00000014274 | 3304,6353 | -0,683648491 | 0,1394936 | -4,900932 | 9,54E-07  | 1,25E-05  | RIMKLB   |
| ENSGALG00000012390 | 2074,4615 | -0,684899295 | 0,1473975 | -4,646615 | 3,37E-06  | 3,87E-05  | PPP1R14C |
| ENSGALG00000009152 | 8451,9252 | -0,685418448 | 0,1346381 | -5,09082  | 3,57E-07  | 5,10E-06  | ATRN1    |
| ENSGALG00000004631 | 4926,2821 | -0,686947368 | 0,1966631 | -3,493016 | 0,0004776 | 0,0028862 | DRAXIN   |
| ENSGALG00000010836 | 1260,2339 | -0,688393097 | 0,166876  | -4,125178 | 3,70E-05  | 0,0003178 | AHR      |
| ENSGALG00000005990 | 327,32624 | -0,688776212 | 0,2796142 | -2,463309 | 0,0137661 | 0,0451737 | MGLL     |
| ENSGALG00000003726 | 1048,3673 | -0,689550024 | 0,2280538 | -3,023628 | 0,0024976 | 0,0113049 | EGFLAM   |
| ENSGALG00000015879 | 11968,416 | -0,689623134 | 0,1480044 | -4,659477 | 3,17E-06  | 3,66E-05  | HUNK     |
| ENSGALG00000008234 | 5250,562  | -0,689849994 | 0,1273096 | -5,41868  | 6,00E-08  | 1,01E-06  | ORC2     |
| ENSGALG00000016308 | 5133,4014 | -0,690314419 | 0,1281438 | -5,387031 | 7,16E-08  | 1,18E-06  | MYC      |
| ENSGALG00000014686 | 1912,6046 | -0,691021625 | 0,1730464 | -3,993274 | 6,52E-05  | 0,0005167 | FBN2     |
| ENSGALG00000025627 | 543,3063  | -0,691903941 | 0,1957541 | -3,534557 | 0,0004085 | 0,0025313 |          |
| ENSGALG00000017866 | 156,05125 | -0,692156313 | 0,285038  | -2,428295 | 0,01517   | 0,0487927 |          |
| ENSGALG00000008292 | 9417,4765 | -0,69263042  | 0,1222675 | -5,664879 | 1,47E-08  | 2,83E-07  | LRP4     |
| ENSGALG00000017857 | 160,75501 | -0,693298969 | 0,2819397 | -2,459032 | 0,0139312 | 0,0455946 |          |
| ENSGALG00000011679 | 1487,1899 | -0,695574487 | 0,1740708 | -3,995929 | 6,44E-05  | 0,0005116 | DIRC2    |
| ENSGALG00000007371 | 25835,451 | -0,695805113 | 0,1165608 | -5,969459 | 2,38E-09  | 5,36E-08  | IGDCC3   |
| ENSGALG00000017220 | 8610,4222 | -0,695886193 | 0,1257779 | -5,532661 | 3,15E-08  | 5,61E-07  |          |
| ENSGALG00000008758 | 3528,4952 | -0,696392948 | 0,1183183 | -5,88576  | 3,96E-09  | 8,56E-08  | B3GNT5   |
| ENSGALG00000028415 | 2970,1144 | -0,698216592 | 0,2041115 | -3,42076  | 0,0006245 | 0,0036072 |          |
| ENSGALG00000016834 | 1336,2251 | -0,698351437 | 0,1627936 | -4,289798 | 1,79E-05  | 0,0001697 | MCF2L    |
| ENSGALG00000017812 | 214,0597  | -0,698433493 | 0,2584052 | -2,702862 | 0,0068745 | 0,0260208 |          |
| ENSGALG00000002316 | 6016,7291 | -0,700708149 | 0,1098757 | -6,377279 | 1,80E-10  | 4,77E-09  | NUBP2    |
| ENSGALG00000002689 | 3193,9897 | -0,701352786 | 0,134772  | -5,203994 | 1,95E-07  | 2,96E-06  | NUP35    |
| ENSGALG00000012654 | 165,03411 | -0,702415833 | 0,2836155 | -2,476648 | 0,0132623 | 0,0439509 | NFATC1   |
| ENSGALG00000007501 | 495,82592 | -0,702573548 | 0,2210424 | -3,178456 | 0,0014806 | 0,0073545 | P2RX3    |
| ENSGALG00000006592 | 563,46793 | -0,703616422 | 0,1908922 | -3,685937 | 0,0002279 | 0,0015305 | MEIKIN   |
| ENSGALG00000021316 | 17378,378 | -0,704586437 | 0,1023184 | -6,886217 | 5,73E-12  | 1,88E-10  | SLC12A4  |
| ENSGALG00000012153 | 842,90994 | -0,706186244 | 0,1736471 | -4,066791 | 4,77E-05  | 0,0003943 | METTL15  |
| ENSGALG00000002762 | 6873,8438 | -0,70662137  | 0,1320656 | -5,350533 | 8,77E-08  | 1,43E-06  | UHRF1BP1 |
| ENSGALG00000002726 | 8639,3567 | -0,708755608 | 0,1395335 | -5,079466 | 3,78E-07  | 5,38E-06  | KIF1B    |
| ENSGALG00000007141 | 2245,3684 | -0,70907976  | 0,1459375 | -4,858791 | 1,18E-06  | 1,52E-05  | LRRK1    |
| ENSGALG00000011680 | 3554,5974 | -0,709602993 | 0,1836532 | -3,86382  | 0,0001116 | 0,0008235 | EPHA5    |
| ENSGALG00000012848 | 3745,194  | -0,711139877 | 0,1738156 | -4,091346 | 4,29E-05  | 0,0003598 | KDM7A    |
| ENSGALG00000022857 | 997,97159 | -0,711204976 | 0,1675693 | -4,244244 | 2,19E-05  | 0,000203  |          |
| ENSGALG00000015733 | 14565,427 | -0,711632203 | 0,1740069 | -4,089677 | 4,32E-05  | 0,0003619 | MDN1     |
| ENSGALG00000017365 | 2855,5664 | -0,712049377 | 0,1517404 | -4,692551 | 2,70E-06  | 3,17E-05  | REEP2    |
| ENSGALG00000009562 | 5126,9731 | -0,714412903 | 0,1287612 | -5,548356 | 2,88E-08  | 5,20E-07  | PLEK2    |
| ENSGALG00000003970 | 25720,818 | -0,714513793 | 0,1240731 | -5,758812 | 8,47E-09  | 1,70E-07  | TJP1     |
| ENSGALG00000017871 | 177,34037 | -0,715510132 | 0,2848578 | -2,511815 | 0,0120112 | 0,0406308 |          |
| ENSGALG00000003161 | 1569,9242 | -0,715518291 | 0,1658137 | -4,315193 | 1,59E-05  | 0,0001539 | GDF3     |
| ENSGALG00000016927 | 1190,189  | -0,715628819 | 0,1764386 | -4,055965 | 4,99E-05  | 0,0004112 | KLF5     |
| ENSGALG00000013615 | 780,84937 | -0,715808204 | 0,1833387 | -3,904293 | 9,45E-05  | 0,0007136 | MTUS1    |
| ENSGALG00000011076 | 244,64999 | -0,715907242 | 0,2845675 | -2,515773 | 0,0118772 | 0,0402859 | SYNE3    |
| ENSGALG00000010036 | 359,24032 | -0,717787007 | 0,2219662 | -3,233767 | 0,0012217 | 0,0063086 | FOSL2    |
| ENSGALG00000015122 | 2528,5766 | -0,719672556 | 0,1390865 | -5,174279 | 2,29E-07  | 3,42E-06  | TAF4B    |
| ENSGALG00000020805 | 5789,8017 | -0,719835862 | 0,1139176 | -6,318916 | 2,63E-10  | 6,72E-09  | LRRC8D   |
| ENSGALG00000005430 | 950,09062 | -0,72235333  | 0,2022537 | -3,571522 | 0,0003549 | 0,0022423 | ALS2CL   |
| ENSGALG00000002553 | 2782,5411 | -0,723490416 | 0,1606217 | -4,504313 | 6,66E-06  | 7,10E-05  | PCDH1    |
| ENSGALG00000007242 | 1612,8307 | -0,724284111 | 0,1436296 | -5,04272  | 4,59E-07  | 6,42E-06  | SLITRK4  |
| ENSGALG00000008078 | 7758,4981 | -0,725207523 | 0,1252194 | -5,791493 | 6,98E-09  | 1,42E-07  | FUT8     |
| ENSGALG00000006978 | 1693,5845 | -0,725851222 | 0,16966   | -4,27827  | 1,88E-05  | 0,0001778 | APOOL    |
| ENSGALG00000004004 | 8836,3289 | -0,725989536 | 0,1219894 | -5,951253 | 2,66E-09  | 5,95E-08  | PHKB     |

|                    |           |              |           |           |           |           |               |
|--------------------|-----------|--------------|-----------|-----------|-----------|-----------|---------------|
| ENSGALG00000005246 | 9658,48   | -0,7272373   | 0,1233553 | -5,895469 | 3,74E-09  | 8,11E-08  | PAX3          |
| ENSGALG00000028294 | 3609,4147 | -0,727698928 | 0,1304345 | -5,579039 | 2,42E-08  | 4,40E-07  | VWA5B2        |
| ENSGALG00000006939 | 26463,229 | -0,728311968 | 0,1092521 | -6,666343 | 2,62E-11  | 7,76E-10  | PFKP          |
| ENSGALG00000004519 | 237,39511 | -0,728806195 | 0,2713012 | -2,686336 | 0,007224  | 0,02714   | TRPV2         |
| ENSGALG00000006555 | 1381,6916 | -0,729109536 | 0,1554307 | -4,690898 | 2,72E-06  | 3,19E-05  | IGF2          |
| ENSGALG00000025743 | 3141,8277 | -0,729896626 | 0,1215881 | -6,003027 | 1,94E-09  | 4,42E-08  | CDR2          |
| ENSGALG00000016078 | 860,37098 | -0,73004938  | 0,1938639 | -3,765783 | 0,000166  | 0,0011664 | ZFPM2         |
| ENSGALG00000014419 | 9837,2387 | -0,730417334 | 0,1131065 | -6,457784 | 1,06E-10  | 2,87E-09  | SLIT2         |
| ENSGALG00000020479 | 3560,7787 | -0,731996794 | 0,1299087 | -5,634701 | 1,75E-08  | 3,31E-07  | RP11-872D17.8 |
| ENSGALG00000003378 | 7303,9139 | -0,732735156 | 0,1242316 | -5,89814  | 3,68E-09  | 8,01E-08  | USP42         |
| ENSGALG00000015627 | 1040,2204 | -0,73285779  | 0,2129145 | -3,442028 | 0,0005774 | 0,0033796 | HAPLN1        |
| ENSGALG00000026349 | 29196,624 | -0,736634172 | 0,0999371 | -7,370975 | 1,69E-13  | 6,80E-12  | HSD17B12      |
| ENSGALG00000007069 | 592,20837 | -0,738101541 | 0,2325984 | -3,173288 | 0,0015072 | 0,0074595 | ADAMTS17      |
| ENSGALG00000016537 | 11629,834 | -0,739933749 | 0,1619397 | -4,569193 | 4,90E-06  | 5,45E-05  | SCML2         |
| ENSGALG00000010448 | 40598,94  | -0,742255902 | 0,1099244 | -6,752421 | 1,45E-11  | 4,48E-10  | LTBP1         |
| ENSGALG00000002679 | 1869,603  | -0,743662338 | 0,1515547 | -4,90689  | 9,25E-07  | 1,21E-05  | GLT1D1        |
| ENSGALG00000007331 | 18072,434 | -0,744880346 | 0,1084385 | -6,869149 | 6,46E-12  | 2,09E-10  | SVIL          |
| ENSGALG00000027639 | 27019,601 | -0,74689172  | 0,1081151 | -6,908304 | 4,90E-12  | 1,61E-10  | RGMA          |
| ENSGALG00000015077 | 367,6495  | -0,747092368 | 0,2656853 | -2,811945 | 0,0049243 | 0,0198356 | ARHGAP31      |
| ENSGALG00000010522 | 11132,1   | -0,747786716 | 0,1199212 | -6,23565  | 4,50E-10  | 1,11E-08  | ALDH18A1      |
| ENSGALG00000008741 | 273,37173 | -0,747824755 | 0,2458046 | -3,042355 | 0,0023474 | 0,0107607 |               |
| ENSGALG00000003975 | 3354,1135 | -0,748226558 | 0,1450875 | -5,15707  | 2,51E-07  | 3,71E-06  | CEP112        |
| ENSGALG00000008910 | 360,62302 | -0,749041615 | 0,2212545 | -3,385431 | 0,0007107 | 0,0040265 | CERKL         |
| ENSGALG00000003149 | 1878,4222 | -0,749443102 | 0,1529534 | -4,899812 | 9,59E-07  | 1,25E-05  | ITPR3         |
| ENSGALG00000012932 | 193,43191 | -0,749547645 | 0,2920342 | -2,566643 | 0,0102688 | 0,0359195 | FGD4          |
| ENSGALG00000016144 | 227,03636 | -0,75041933  | 0,282532  | -2,656051 | 0,0079062 | 0,0291714 | TMPRSS2       |
| ENSGALG00000007011 | 11491,263 | -0,750635431 | 0,1125238 | -6,670901 | 2,54E-11  | 7,56E-10  | ZBTB16        |
| ENSGALG00000023464 | 2176,7949 | -0,751478603 | 0,162842  | -4,614771 | 3,94E-06  | 4,45E-05  |               |
| ENSGALG00000018479 | 498,05044 | -0,753094112 | 0,2693867 | -2,795587 | 0,0051806 | 0,0206479 |               |
| ENSGALG00000019961 | 8882,8923 | -0,7532835   | 0,1292302 | -5,829007 | 5,58E-09  | 1,16E-07  | SLC18B1       |
| ENSGALG00000003430 | 9094,4226 | -0,754857044 | 0,1082845 | -6,971053 | 3,15E-12  | 1,08E-10  | PMS2          |
| ENSGALG00000015862 | 12207,703 | -0,756350316 | 0,1499013 | -5,045657 | 4,52E-07  | 6,34E-06  | CA2           |
| ENSGALG00000008318 | 18620,526 | -0,756789619 | 0,1179267 | -6,41746  | 1,39E-10  | 3,71E-09  | SLK           |
| ENSGALG00000010412 | 643,75824 | -0,756929566 | 0,1797201 | -4,211714 | 2,53E-05  | 0,00023   | WWTR1         |
| ENSGALG00000004981 | 3521,9026 | -0,757070103 | 0,1329306 | -5,695226 | 1,23E-08  | 2,40E-07  | TSEN2         |
| ENSGALG00000006981 | 1290,8961 | -0,757579596 | 0,1692071 | -4,477234 | 7,56E-06  | 8,01E-05  | MCTP2         |
| ENSGALG00000007667 | 1024,279  | -0,757882718 | 0,1665229 | -4,551224 | 5,33E-06  | 5,86E-05  | GPR158        |
| ENSGALG00000000742 | 7852,9776 | -0,757900463 | 0,1311808 | -5,777528 | 7,58E-09  | 1,53E-07  | PIM1          |
| ENSGALG00000001419 | 2086,701  | -0,758492411 | 0,1407402 | -5,389307 | 7,07E-08  | 1,17E-06  | DAB2IP        |
| ENSGALG00000016294 | 651,26015 | -0,761040192 | 0,2034016 | -3,741564 | 0,0001829 | 0,0012678 | HMGCLL1       |
| ENSGALG00000009748 | 12417,603 | -0,762363604 | 0,1219472 | -6,251585 | 4,06E-10  | 1,01E-08  | ASNS          |
| ENSGALG00000006167 | 4665,1269 | -0,763429455 | 0,1613684 | -4,730971 | 2,23E-06  | 2,66E-05  | LRRC8B        |
| ENSGALG00000017462 | 3834,7093 | -0,763892042 | 0,1177124 | -6,489476 | 8,61E-11  | 2,38E-09  | FNIP1         |
| ENSGALG00000028254 | 428,45012 | -0,764100303 | 0,2118876 | -3,606159 | 0,0003108 | 0,0019995 |               |
| ENSGALG00000007300 | 11025,546 | -0,764508198 | 0,1238668 | -6,172016 | 6,74E-10  | 1,63E-08  | PYCR2         |
| ENSGALG00000026862 | 22574,745 | -0,764882325 | 0,1624148 | -4,709438 | 2,48E-06  | 2,94E-05  | CLDN1         |
| ENSGALG00000008621 | 9873,262  | -0,76612038  | 0,131649  | -5,819416 | 5,91E-09  | 1,22E-07  | NRP2          |
| ENSGALG00000027389 | 3852,8154 | -0,766788012 | 0,1308552 | -5,85982  | 4,63E-09  | 9,83E-08  | RGS7BP        |
| ENSGALG00000010598 | 220,78888 | -0,767088888 | 0,2736996 | -2,802667 | 0,0050682 | 0,0202892 | KCNK10        |
| ENSGALG00000013782 | 3281,2809 | -0,769533335 | 0,1760353 | -4,371472 | 1,23E-05  | 0,0001244 | CDH7          |
| ENSGALG00000026897 | 591,30007 | -0,770711311 | 0,2031153 | -3,794453 | 0,000148  | 0,0010531 |               |
| ENSGALG00000028737 | 5045,3512 | -0,771568179 | 0,1454081 | -5,306224 | 1,12E-07  | 1,78E-06  |               |
| ENSGALG00000000317 | 6552,3317 | -0,771905791 | 0,3101223 | -2,489037 | 0,012809  | 0,0427961 | NEFM          |
| ENSGALG00000026518 | 766,81567 | -0,773283921 | 0,178411  | -4,334283 | 1,46E-05  | 0,000144  | RUNDC3A       |
| ENSGALG00000005610 | 640,25249 | -0,773621314 | 0,242648  | -3,188245 | 0,0014314 | 0,0071802 | SLC44A3       |
| ENSGALG00000004594 | 1038,5627 | -0,774792529 | 0,2089107 | -3,708727 | 0,0002083 | 0,0014145 | CD74          |
| ENSGALG00000013627 | 453,51839 | -0,775913381 | 0,2108029 | -3,680753 | 0,0002325 | 0,0015558 | SLC7A2        |
| ENSGALG00000015887 | 12708,103 | -0,776552733 | 0,129241  | -6,008564 | 1,87E-09  | 4,28E-08  | URB1          |
| ENSGALG00000015208 | 6752,9307 | -0,778489641 | 0,1611505 | -4,830824 | 1,36E-06  | 1,72E-05  | ROR2          |
| ENSGALG00000006258 | 9759,6638 | -0,778635815 | 0,1224981 | -6,356312 | 2,07E-10  | 5,40E-09  | SPOCK1        |
| ENSGALG00000009514 | 5928,6059 | -0,779501664 | 0,1147864 | -6,790888 | 1,11E-11  | 3,50E-10  | NRCAM         |
| ENSGALG00000001020 | 7177,3339 | -0,780112538 | 0,1084839 | -7,191044 | 6,43E-13  | 2,41E-11  | KIFC3         |

|                    |           |              |           |           |           |           |            |
|--------------------|-----------|--------------|-----------|-----------|-----------|-----------|------------|
| ENSGALG00000013683 | 18236,905 | -0,780228434 | 0,1531512 | -5,094499 | 3,50E-07  | 5,02E-06  | ARID1B     |
| ENSGALG00000008961 | 32098,143 | -0,780468343 | 0,1668861 | -4,676652 | 2,92E-06  | 3,39E-05  | PTPRZ1     |
| ENSGALG00000012834 | 693,3013  | -0,78090617  | 0,243104  | -3,212231 | 0,0013171 | 0,0067111 | AKR1D1     |
| ENSGALG00000024964 | 133,81844 | -0,781593119 | 0,3102875 | -2,518932 | 0,0117711 | 0,0399966 |            |
| ENSGALG00000009393 | 806,58478 | -0,782303357 | 0,1913491 | -4,088356 | 4,34E-05  | 0,0003633 | CAV1       |
| ENSGALG00000012329 | 10571,297 | -0,782765701 | 0,1633862 | -4,790892 | 1,66E-06  | 2,05E-05  | GLI3       |
| ENSGALG00000017864 | 140,93672 | -0,783664392 | 0,2920232 | -2,683569 | 0,0072841 | 0,0272978 |            |
| ENSGALG00000026970 | 1108,6536 | -0,785311616 | 0,1563721 | -5,022071 | 5,11E-07  | 7,09E-06  |            |
| ENSGALG00000009252 | 7419,3312 | -0,788959505 | 0,1242797 | -6,348257 | 2,18E-10  | 5,65E-09  | PLD1       |
| ENSGALG00000012808 | 5957,06   | -0,789210521 | 0,1360454 | -5,801083 | 6,59E-09  | 1,35E-07  | CDYL       |
| ENSGALG00000006908 | 14243,327 | -0,789724754 | 0,1486312 | -5,313318 | 1,08E-07  | 1,72E-06  | DLG1       |
| ENSGALG00000000639 | 611,51653 | -0,79001541  | 0,2261059 | -3,494006 | 0,0004758 | 0,0028767 | LRRN2      |
| ENSGALG00000008411 | 91,4625   | -0,790605178 | 0,3210824 | -2,462313 | 0,0138044 | 0,0452558 | GHRL       |
| ENSGALG00000016412 | 2161,4314 | -0,791360693 | 0,1346388 | -5,877656 | 4,16E-09  | 8,94E-08  | MBOAT2     |
| ENSGALG00000005785 | 2650,4252 | -0,791416097 | 0,1851664 | -4,274081 | 1,92E-05  | 0,0001807 | UBAP2      |
| ENSGALG00000009428 | 6528,6197 | -0,792261942 | 0,1416583 | -5,592767 | 2,23E-08  | 4,11E-07  | SUSD6      |
| ENSGALG00000004662 | 3631,9487 | -0,792400882 | 0,1664941 | -4,759334 | 1,94E-06  | 2,35E-05  | DISP3      |
| ENSGALG00000001995 | 9089,1491 | -0,794307619 | 0,1100185 | -7,219767 | 5,21E-13  | 1,99E-11  | LIMS2      |
| ENSGALG00000012317 | 261,45531 | -0,794799886 | 0,2552487 | -3,113826 | 0,0018468 | 0,008807  | ADGB       |
| ENSGALG00000003470 | 221,25413 | -0,795180239 | 0,2878091 | -2,762873 | 0,0057295 | 0,0223837 | ZMAT4      |
| ENSGALG00000025464 | 234,06627 | -0,795229903 | 0,2531202 | -3,141708 | 0,0016797 | 0,0081615 |            |
| ENSGALG00000009808 | 209,51024 | -0,795296038 | 0,2773049 | -2,867948 | 0,0041314 | 0,0171336 | AVPR1A     |
| ENSGALG00000012178 | 117,35655 | -0,79634844  | 0,3097478 | -2,570958 | 0,0101418 | 0,0355602 | PDGFB      |
| ENSGALG00000004132 | 38489,958 | -0,797075856 | 0,1145646 | -6,957436 | 3,47E-12  | 1,17E-10  | UHRF1      |
| ENSGALG00000026486 | 578,46167 | -0,797913674 | 0,2123431 | -3,757662 | 0,0001715 | 0,0012006 |            |
| ENSGALG00000008378 | 25019,971 | -0,798096236 | 0,1224811 | -6,516075 | 7,22E-11  | 2,01E-09  | SRGAP3     |
| ENSGALG00000009932 | 6037,7104 | -0,798314026 | 0,1391751 | -5,736039 | 9,69E-09  | 1,92E-07  | THADA      |
| ENSGALG00000011045 | 4900,9878 | -0,799075807 | 0,1382254 | -5,780962 | 7,43E-09  | 1,50E-07  | AFF1       |
| ENSGALG00000014907 | 2917,0076 | -0,80019622  | 0,1504507 | -5,318662 | 1,05E-07  | 1,68E-06  | DCBLD1     |
| ENSGALG00000010910 | 3629,9835 | -0,801671392 | 0,1211047 | -6,619657 | 3,60E-11  | 1,04E-09  | RAPGEF5    |
| ENSGALG00000012576 | 1359,5745 | -0,801916632 | 0,1553997 | -5,160349 | 2,46E-07  | 3,65E-06  | RASEF      |
| ENSGALG00000000583 | 9340,9356 | -0,802342978 | 0,1195873 | -6,709264 | 1,96E-11  | 5,94E-10  | SOX13      |
| ENSGALG00000017044 | 315,56866 | -0,803518305 | 0,2643771 | -3,039289 | 0,0023714 | 0,0108489 | TRPC4      |
| ENSGALG00000002900 | 2509,7754 | -0,803716995 | 0,1458872 | -5,509169 | 3,61E-08  | 6,34E-07  | NOTUM      |
| ENSGALG00000027521 | 307,65741 | -0,803725098 | 0,23936   | -3,357809 | 0,0007856 | 0,0043909 | ANKRD33B   |
| ENSGALG00000013212 | 21085,124 | -0,805085082 | 0,1156431 | -6,961806 | 3,36E-12  | 1,14E-10  | TMEFF1     |
| ENSGALG00000001883 | 2479,1556 | -0,805297687 | 0,1269406 | -6,343891 | 2,24E-10  | 5,80E-09  | ST6GALNAC2 |
| ENSGALG00000003105 | 820,42554 | -0,805784417 | 0,1904502 | -4,230946 | 2,33E-05  | 0,0002134 | ANKFN1     |
| ENSGALG00000002461 | 9290,0239 | -0,808165073 | 0,1405519 | -5,749941 | 8,93E-09  | 1,77E-07  | MMP17      |
| ENSGALG00000002242 | 344,64399 | -0,808545932 | 0,229428  | -3,524182 | 0,0004248 | 0,0026217 | GALNT9     |
| ENSGALG00000017103 | 2337,4348 | -0,811501513 | 0,1279991 | -6,339902 | 2,30E-10  | 5,93E-09  | WASF3      |
| ENSGALG00000014957 | 24709,132 | -0,81285735  | 0,1124851 | -7,226354 | 4,96E-13  | 1,90E-11  | WDR1       |
| ENSGALG00000003427 | 8550,6609 | -0,813323099 | 0,1234103 | -6,590399 | 4,39E-11  | 1,25E-09  | USP3       |
| ENSGALG00000001136 | 15067,474 | -0,813551169 | 0,3048155 | -2,668996 | 0,0076078 | 0,0283008 |            |
| ENSGALG00000011089 | 415,15739 | -0,814043658 | 0,2251011 | -3,616347 | 0,0002988 | 0,0019353 | IFIH1      |
| ENSGALG00000011643 | 20679,582 | -0,816325927 | 0,1468695 | -5,558172 | 2,73E-08  | 4,94E-07  | UTP20      |
| ENSGALG00000010785 | 498,93848 | -0,818155142 | 0,1993699 | -4,103705 | 4,07E-05  | 0,0003453 | ACOT11     |
| ENSGALG00000001220 | 3875,7891 | -0,818155857 | 0,1299079 | -6,297969 | 3,02E-10  | 7,62E-09  | HERPUD1    |
| ENSGALG00000002598 | 7963,9328 | -0,82047281  | 0,1085944 | -7,555386 | 4,18E-14  | 1,82E-12  | TPST1      |
| ENSGALG00000011511 | 101055,81 | -0,820640197 | 0,126541  | -6,485172 | 8,86E-11  | 2,44E-09  | CKB        |
| ENSGALG00000003160 | 1417,9918 | -0,823423786 | 0,1758829 | -4,68166  | 2,85E-06  | 3,32E-05  | CERS1      |
| ENSGALG00000026370 | 123,7781  | -0,823508807 | 0,3145625 | -2,61795  | 0,008846  | 0,0318788 |            |
| ENSGALG00000006872 | 8998,3245 | -0,823650254 | 0,1148886 | -7,169119 | 7,55E-13  | 2,79E-11  | PISD       |
| ENSGALG00000007039 | 11318,955 | -0,823801989 | 0,1338606 | -6,154178 | 7,55E-10  | 1,82E-08  | IGF1R      |
| ENSGALG00000004569 | 2222,4465 | -0,82424563  | 0,1654621 | -4,981477 | 6,31E-07  | 8,53E-06  | UNC5B      |
| ENSGALG00000010507 | 1443,24   | -0,824303692 | 0,1501991 | -5,488074 | 4,06E-08  | 7,08E-07  | FCRL2      |
| ENSGALG00000011623 | 9810,9245 | -0,826439103 | 0,3226307 | -2,561564 | 0,0104202 | 0,0363586 | ADAMTS3    |
| ENSGALG00000003391 | 10590,452 | -0,827807721 | 0,1094916 | -7,56047  | 4,02E-14  | 1,76E-12  | EIF2AK1    |
| ENSGALG00000017855 | 167,53221 | -0,830680639 | 0,3021834 | -2,748929 | 0,005979  | 0,0232054 |            |
| ENSGALG00000009546 | 1643,0136 | -0,832251183 | 0,1524822 | -5,45802  | 4,81E-08  | 8,27E-07  | HTRA1      |
| ENSGALG00000007717 | 242,86019 | -0,834765713 | 0,2552035 | -3,270981 | 0,0010718 | 0,0056624 | GCNT7      |
| ENSGALG00000014954 | 7661,4102 | -0,835213371 | 0,1158293 | -7,210726 | 5,57E-13  | 2,10E-11  | ZNF518B    |



|                     |           |              |           |           |           |           |              |
|---------------------|-----------|--------------|-----------|-----------|-----------|-----------|--------------|
| ENSGALG00000008469  | 4008,4217 | -0,83875822  | 0,1497579 | -5,600763 | 2,13E-08  | 3,94E-07  | SPINT1       |
| ENSGALG00000002543  | 5887,0903 | -0,840502021 | 0,1240047 | -6,777985 | 1,22E-11  | 3,81E-10  | CSGALNACT2   |
| ENSGALG000000015980 | 410,78574 | -0,841274637 | 0,2500328 | -3,364658 | 0,0007664 | 0,004294  |              |
| ENSGALG000000011388 | 12926,485 | -0,842306194 | 0,1210688 | -6,957254 | 3,47E-12  | 1,17E-10  | RABGGTB      |
| ENSGALG00000004627  | 119,19825 | -0,843337638 | 0,3097612 | -2,722542 | 0,0064782 | 0,0248312 | LAMC2        |
| ENSGALG000000015519 | 4471,9334 | -0,844394446 | 0,1245073 | -6,781886 | 1,19E-11  | 3,71E-10  | ROBO2        |
| ENSGALG000000015656 | 12813,534 | -0,849003497 | 0,1245832 | -6,814749 | 9,44E-12  | 3,00E-10  | AKAP2        |
| ENSGALG000000012998 | 2617,3459 | -0,849149352 | 0,1768308 | -4,802043 | 1,57E-06  | 1,96E-05  | WNT5B        |
| ENSGALG000000024984 | 247,00772 | -0,849437052 | 0,2463411 | -3,448214 | 0,0005643 | 0,0033217 |              |
| ENSGALG000000023609 | 5841,3037 | -0,855145185 | 0,1351075 | -6,329368 | 2,46E-10  | 6,31E-09  |              |
| ENSGALG000000014178 | 3963,5155 | -0,855544377 | 0,1502564 | -5,693895 | 1,24E-08  | 2,41E-07  | SCUBE1       |
| ENSGALG000000012394 | 13948,867 | -0,855781498 | 0,1036166 | -8,259118 | 1,47E-16  | 8,54E-15  | NID2         |
| ENSGALG000000012873 | 33,50313  | -0,858492519 | 0,3501442 | -2,451826 | 0,0142133 | 0,0463619 | SERPINB5     |
| ENSGALG000000003668 | 1594,4405 | -0,85921128  | 0,1422579 | -6,039814 | 1,54E-09  | 3,57E-08  | PITPNC1      |
| ENSGALG000000007846 | 1019,2888 | -0,863598394 | 0,2308913 | -3,740281 | 0,0001838 | 0,0012722 |              |
| ENSGALG000000010311 | 430,97249 | -0,865329105 | 0,2059571 | -4,201502 | 2,65E-05  | 0,0002391 | NAV3         |
| ENSGALG000000015681 | 7286,4362 | -0,869123123 | 0,1385988 | -6,270786 | 3,59E-10  | 9,02E-09  | NRIP1        |
| ENSGALG000000010010 | 1250,7492 | -0,869227214 | 0,1534764 | -5,66359  | 1,48E-08  | 2,84E-07  | RHOQ         |
| ENSGALG000000008815 | 1450,4816 | -0,86979829  | 0,1663609 | -5,22838  | 1,71E-07  | 2,63E-06  | LRRN4        |
| ENSGALG000000011376 | 402,72686 | -0,870171475 | 0,2115735 | -4,112858 | 3,91E-05  | 0,0003342 | ANKRD9       |
| ENSGALG000000020703 | 83,715675 | -0,87414394  | 0,3266079 | -2,676432 | 0,0074411 | 0,0277943 | GRB14        |
| ENSGALG000000016896 | 2175,6547 | -0,874558686 | 0,1602235 | -5,458368 | 4,81E-08  | 8,26E-07  | ABCC4        |
| ENSGALG000000016981 | 36,264584 | -0,876405769 | 0,3539545 | -2,476041 | 0,0132848 | 0,0439973 | SPERT        |
| ENSGALG000000023581 | 218,88299 | -0,876769713 | 0,2786993 | -3,145934 | 0,0016556 | 0,0080646 |              |
| ENSGALG000000009129 | 1209,8208 | -0,878296092 | 0,1715571 | -5,119557 | 3,06E-07  | 4,43E-06  | DLX5         |
| ENSGALG000000004542 | 7447,8359 | -0,879244031 | 0,1445917 | -6,080875 | 1,20E-09  | 2,81E-08  | ZMYND8       |
| ENSGALG000000016462 | 9552,6988 | -0,880157248 | 0,1399598 | -6,288642 | 3,20E-10  | 8,07E-09  | MYCN         |
| ENSGALG000000028602 | 5443,1954 | -0,881510014 | 0,1576328 | -5,592172 | 2,24E-08  | 4,12E-07  |              |
| ENSGALG000000011120 | 494,96982 | -0,88227849  | 0,2357487 | -3,742453 | 0,0001822 | 0,0012646 | SLC4A10      |
| ENSGALG000000003657 | 764,547   | -0,88270712  | 0,1987799 | -4,440625 | 8,97E-06  | 9,38E-05  | UNC119       |
| ENSGALG000000027633 | 124,92778 | -0,88394595  | 0,3059642 | -2,88905  | 0,0038641 | 0,0162676 | RASSF9       |
| ENSGALG000000028320 | 417,90377 | -0,88451445  | 0,2720255 | -3,251586 | 0,0011476 | 0,0059985 |              |
| ENSGALG000000001749 | 4549,2907 | -0,88875485  | 0,1275791 | -6,966303 | 3,25E-12  | 1,11E-10  | ACSBG2       |
| ENSGALG000000005723 | 2016,6496 | -0,890647194 | 0,1398661 | -6,367856 | 1,92E-10  | 5,03E-09  | RP11-96O20.4 |
| ENSGALG000000009360 | 602,38543 | -0,890830846 | 0,1924613 | -4,628624 | 3,68E-06  | 4,19E-05  | CAPN2        |
| ENSGALG000000002555 | 1358,1498 | -0,892902927 | 0,2116768 | -4,218237 | 2,46E-05  | 0,0002247 | RET          |
| ENSGALG000000000307 | 8913,0835 | -0,894951246 | 0,1134627 | -7,887626 | 3,08E-15  | 1,50E-13  | CERS4        |
| ENSGALG000000012012 | 5383,1455 | -0,895703636 | 0,1725569 | -5,190772 | 2,09E-07  | 3,15E-06  | CMIP         |
| ENSGALG000000017870 | 493,11834 | -0,896459218 | 0,2052027 | -4,368652 | 1,25E-05  | 0,0001254 |              |
| ENSGALG000000008547 | 11178,2   | -0,896850751 | 0,1262491 | -7,103817 | 1,21E-12  | 4,41E-11  | ZBED4        |
| ENSGALG000000008509 | 336,23193 | -0,897122538 | 0,2669373 | -3,360799 | 0,0007772 | 0,004349  | SEMA3E       |
| ENSGALG000000012814 | 2520,1319 | -0,898069575 | 0,1279271 | -7,020165 | 2,22E-12  | 7,76E-11  | PXDC1        |
| ENSGALG000000017838 | 224,75144 | -0,898451215 | 0,2607674 | -3,445413 | 0,0005702 | 0,0033455 |              |
| ENSGALG000000027269 | 123,982   | -0,898861923 | 0,3460342 | -2,59761  | 0,0093875 | 0,0333927 | GUCA2B       |
| ENSGALG000000009687 | 2155,9656 | -0,89897016  | 0,1572674 | -5,71619  | 1,09E-08  | 2,13E-07  | KCNK2        |
| ENSGALG000000014645 | 469,37544 | -0,89901657  | 0,2175335 | -4,132773 | 3,58E-05  | 0,0003098 | MEF2C        |
| ENSGALG000000006498 | 20254,306 | -0,899416586 | 0,1691498 | -5,317278 | 1,05E-07  | 1,69E-06  | PTPRN2       |
| ENSGALG000000013149 | 142,93297 | -0,899640208 | 0,2949853 | -3,04978  | 0,0022901 | 0,0105372 | MOCOS        |
| ENSGALG000000025723 | 123,40432 | -0,903219239 | 0,3196649 | -2,825519 | 0,0047204 | 0,0191048 | NKX1-1       |
| ENSGALG000000026790 | 419,69129 | -0,903869706 | 0,2560648 | -3,529848 | 0,0004158 | 0,0025729 | DMRT2        |
| ENSGALG000000002704 | 377,64333 | -0,906514113 | 0,2414033 | -3,755185 | 0,0001732 | 0,0012112 | AFAP1L1      |
| ENSGALG000000027960 | 55,099779 | -0,908090032 | 0,3479917 | -2,609516 | 0,009067  | 0,0324691 | GRPR         |
| ENSGALG000000017876 | 51,084697 | -0,908586905 | 0,3511323 | -2,587592 | 0,0096649 | 0,0342054 |              |
| ENSGALG000000026258 | 289,1614  | -0,909500707 | 0,2404705 | -3,782171 | 0,0001555 | 0,0011001 |              |
| ENSGALG000000004231 | 640,94875 | -0,911405982 | 0,183472  | -4,967547 | 6,78E-07  | 9,10E-06  | IFNLR1       |
| ENSGALG000000013861 | 1063,5397 | -0,913164571 | 0,1795586 | -5,085609 | 3,66E-07  | 5,22E-06  | TNFAIP3      |
| ENSGALG000000020723 | 828,74872 | -0,913543779 | 0,1755447 | -5,204053 | 1,95E-07  | 2,96E-06  | NOG2         |
| ENSGALG000000019622 | 6843,9055 | -0,918336915 | 0,3199295 | -2,870435 | 0,0040991 | 0,0170409 | TRIM71       |
| ENSGALG000000005994 | 969,59836 | -0,91862167  | 0,1776308 | -5,171523 | 2,32E-07  | 3,46E-06  | DERL3        |
| ENSGALG000000010683 | 599,9885  | -0,919156764 | 0,2019322 | -4,551809 | 5,32E-06  | 5,85E-05  | S1PR3        |
| ENSGALG000000001656 | 26148,058 | -0,922800056 | 0,1104664 | -8,35367  | 6,62E-17  | 4,00E-15  | sept-09      |
| ENSGALG000000009540 | 5865,4242 | -0,9229711   | 0,1165261 | -7,920723 | 2,36E-15  | 1,17E-13  | YAF2         |

|                     |           |              |           |           |           |           |         |
|---------------------|-----------|--------------|-----------|-----------|-----------|-----------|---------|
| ENSGALG00000025166  | 165,3461  | -0,924288426 | 0,2874597 | -3,215367 | 0,0013028 | 0,0066557 |         |
| ENSGALG00000001000  | 110996,8  | -0,924720639 | 0,1374659 | -6,726907 | 1,73E-11  | 5,28E-10  | HSPA5   |
| ENSGALG000000008305 | 1229,5865 | -0,925580955 | 0,1854564 | -4,990827 | 6,01E-07  | 8,18E-06  | CASP10  |
| ENSGALG00000016843  | 7409,4478 | -0,926939677 | 0,1285541 | -7,210501 | 5,57E-13  | 2,10E-11  | COL4A2  |
| ENSGALG000000023100 | 28,255969 | -0,928527718 | 0,3431483 | -2,705908 | 0,0068118 | 0,025848  |         |
| ENSGALG00000014961  | 70,382782 | -0,928667888 | 0,3536337 | -2,626073 | 0,0086376 | 0,0312686 | FAM26E  |
| ENSGALG00000009262  | 127,08834 | -0,928869092 | 0,3039249 | -3,056245 | 0,0022413 | 0,0103476 | FGB     |
| ENSGALG00000012911  | 418,92558 | -0,929872331 | 0,2601161 | -3,574836 | 0,0003504 | 0,0022213 | SYT10   |
| ENSGALG000000008811 | 6177,8009 | -0,931412058 | 0,1489053 | -6,255065 | 3,97E-10  | 9,87E-09  | SLC1A4  |
| ENSGALG00000007952  | 17655,501 | -0,932963194 | 0,1344416 | -6,939543 | 3,93E-12  | 1,32E-10  | AMOT    |
| ENSGALG00000023241  | 1184,6759 | -0,938819916 | 0,1882587 | -4,986861 | 6,14E-07  | 8,32E-06  |         |
| ENSGALG00000028708  | 6182,0112 | -0,938854547 | 0,1258631 | -7,459329 | 8,70E-14  | 3,59E-12  |         |
| ENSGALG00000009415  | 20765,099 | -0,939656238 | 0,1402127 | -6,701647 | 2,06E-11  | 6,21E-10  | SMOC1   |
| ENSGALG00000012726  | 95084,968 | -0,941672551 | 0,1261141 | -7,466831 | 8,21E-14  | 3,42E-12  | HSP90B1 |
| ENSGALG00000015622  | 657,0594  | -0,944352456 | 0,2173775 | -4,344298 | 1,40E-05  | 0,0001385 | EYA1    |
| ENSGALG00000015028  | 404,3337  | -0,946739996 | 0,2500725 | -3,785863 | 0,0001532 | 0,0010858 | RLN1    |
| ENSGALG00000011258  | 44996,798 | -0,946927699 | 0,1449344 | -6,533494 | 6,43E-11  | 1,81E-09  | ATP2B1  |
| ENSGALG00000011068  | 1649,8566 | -0,947751489 | 0,1445198 | -6,557937 | 5,46E-11  | 1,54E-09  | COBL1   |
| ENSGALG00000005601  | 522,73024 | -0,948098308 | 0,2254007 | -4,206279 | 2,60E-05  | 0,0002346 | DNAH12  |
| ENSGALG00000006808  | 9236,5969 | -0,948868926 | 0,1071422 | -8,856165 | 8,28E-19  | 6,00E-17  | TSPAN6  |
| ENSGALG00000013193  | 667,61334 | -0,948945842 | 0,2164896 | -4,383332 | 1,17E-05  | 0,0001183 | IRX2    |
| ENSGALG00000023608  | 3676,9857 | -0,950348621 | 0,134551  | -7,06311  | 1,63E-12  | 5,82E-11  |         |
| ENSGALG00000027260  | 44,084585 | -0,951699131 | 0,3538862 | -2,68928  | 0,0071606 | 0,0269519 | MC3R    |
| ENSGALG00000005805  | 4566,7573 | -0,954718819 | 0,1455167 | -6,560889 | 5,35E-11  | 1,52E-09  | PLCD1   |
| ENSGALG00000023463  | 1598,1146 | -0,956997326 | 0,1712907 | -5,586978 | 2,31E-08  | 4,24E-07  |         |
| ENSGALG00000017875  | 78,294933 | -0,958367374 | 0,3317498 | -2,888825 | 0,0038668 | 0,0162692 |         |
| ENSGALG00000002577  | 53,909401 | -0,959612138 | 0,3537853 | -2,712414 | 0,0066795 | 0,025481  | STARD10 |
| ENSGALG00000004393  | 1366,8686 | -0,962441655 | 0,2126961 | -4,524962 | 6,04E-06  | 6,51E-05  |         |
| ENSGALG00000004284  | 19106,512 | -0,967926178 | 0,1544238 | -6,267988 | 3,66E-10  | 9,15E-09  | LFNG    |
| ENSGALG00000027342  | 11330,786 | -0,968330352 | 0,1154603 | -8,386697 | 5,00E-17  | 3,08E-15  | METR1   |
| ENSGALG00000015908  | 1062,9623 | -0,970529728 | 0,2034554 | -4,770232 | 1,84E-06  | 2,24E-05  | COL12A1 |
| ENSGALG00000011833  | 13327,666 | -0,971207285 | 0,1137465 | -8,538346 | 1,36E-17  | 8,83E-16  | SPATA5  |
| ENSGALG00000009381  | 15338,368 | -0,972226453 | 0,1330298 | -7,308336 | 2,70E-13  | 1,06E-11  | SIPA1L1 |
| ENSGALG00000015940  | 2397,4582 | -0,972506334 | 0,1424398 | -6,827491 | 8,64E-12  | 2,76E-10  | TMEM67  |
| ENSGALG00000007367  | 230,09823 | -0,973082329 | 0,2646976 | -3,676204 | 0,0002367 | 0,0015799 | WFIK1   |
| ENSGALG00000010597  | 2446,5354 | -0,973101915 | 0,127224  | -7,64873  | 2,03E-14  | 9,27E-13  | CRIM1   |
| ENSGALG00000027497  | 292,35552 | -0,973179721 | 0,2340886 | -4,157313 | 3,22E-05  | 0,0002823 | CFD     |
| ENSGALG00000019397  | 12676,413 | -0,975439675 | 0,1148854 | -8,490543 | 2,06E-17  | 1,31E-15  | CERK    |
| ENSGALG00000026995  | 97,429549 | -0,97623355  | 0,3272256 | -2,983365 | 0,002851  | 0,0126313 | RHOG    |
| ENSGALG00000002103  | 289,28254 | -0,979001464 | 0,2861261 | -3,421574 | 0,0006226 | 0,0035994 | TPP3    |
| ENSGALG00000015624  | 34457,429 | -0,97910183  | 0,1758979 | -5,566309 | 2,60E-08  | 4,72E-07  | VCAN    |
| ENSGALG00000012418  | 35,255982 | -0,979401863 | 0,3538633 | -2,767741 | 0,0056446 | 0,0221474 | KYNU    |
| ENSGALG00000015164  | 3228,2862 | -0,982829392 | 0,1480222 | -6,639743 | 3,14E-11  | 9,24E-10  | PCSK5   |
| ENSGALG00000020788  | 1411,7356 | -0,986044977 | 0,148882  | -6,622998 | 3,52E-11  | 1,02E-09  | CCDC141 |
| ENSGALG00000001371  | 2323,3283 | -0,990350626 | 0,1647412 | -6,011554 | 1,84E-09  | 4,21E-08  |         |
| ENSGALG00000009758  | 793,28474 | -0,991410492 | 0,1927041 | -5,144731 | 2,68E-07  | 3,94E-06  | SLC7A11 |
| ENSGALG00000015914  | 35,887211 | -0,993778818 | 0,3538558 | -2,808429 | 0,0049784 | 0,0200099 | CALB1   |
| ENSGALG00000015440  | 170,65631 | -0,996123586 | 0,2860343 | -3,482532 | 0,0004967 | 0,0029843 | RCSD1   |
| ENSGALG00000010692  | 6955,6689 | -0,996294098 | 0,1389198 | -7,171722 | 7,41E-13  | 2,76E-11  | LRP8    |
| ENSGALG00000026582  | 1194,487  | -0,997100015 | 0,1907735 | -5,226618 | 1,73E-07  | 2,64E-06  | SOX18   |
| ENSGALG00000002532  | 116,30592 | -0,997428466 | 0,3168923 | -3,147531 | 0,0016466 | 0,0080322 | GJA4    |
| ENSGALG00000010163  | 10928,524 | -0,998496131 | 0,1269077 | -7,867891 | 3,61E-15  | 1,74E-13  | LGR5    |
| ENSGALG00000007483  | 18280,16  | -0,999963194 | 0,1499281 | -6,669618 | 2,56E-11  | 7,61E-10  | LRIG1   |
| ENSGALG00000005483  | 1190,7719 | -1,005472997 | 0,1552955 | -6,474578 | 9,51E-11  | 2,59E-09  | CDH13   |
| ENSGALG00000012454  | 37,219552 | -1,005696393 | 0,3507698 | -2,867112 | 0,0041424 | 0,017158  | CYTH4   |
| ENSGALG00000011295  | 1389,1449 | -1,007421144 | 0,1580798 | -6,372863 | 1,86E-10  | 4,90E-09  | SOCS2   |
| ENSGALG00000016627  | 15863,827 | -1,008110823 | 0,1082287 | -9,314637 | 1,22E-20  | 1,03E-18  | FZD3    |
| ENSGALG00000008281  | 355,49596 | -1,009962725 | 0,2355243 | -4,288147 | 1,80E-05  | 0,0001708 | NEURL1  |
| ENSGALG00000015078  | 5440,7576 | -1,010765666 | 0,1823319 | -5,543548 | 2,96E-08  | 5,32E-07  | MLLT3   |
| ENSGALG00000015112  | 8576,8627 | -1,013051509 | 0,1332664 | -7,601703 | 2,92E-14  | 1,31E-12  | ZNF521  |
| ENSGALG00000000949  | 297,0835  | -1,013784064 | 0,2329319 | -4,352276 | 1,35E-05  | 0,0001336 | HBEGF   |
| ENSGALG00000016616  | 1435,9249 | -1,01551489  | 0,1675974 | -6,059252 | 1,37E-09  | 3,18E-08  | ANOS1   |

|                     |           |              |           |           |           |           |           |
|---------------------|-----------|--------------|-----------|-----------|-----------|-----------|-----------|
| ENSGALG00000009450  | 2394,0442 | -1,016064164 | 0,1296479 | -7,837106 | 4,61E-15  | 2,19E-13  | DUSP10    |
| ENSGALG00000001009  | 527,81732 | -1,018620159 | 0,2467658 | -4,127883 | 3,66E-05  | 0,0003151 |           |
| ENSGALG000000015896 | 2100,3865 | -1,023057651 | 0,1679504 | -6,091426 | 1,12E-09  | 2,64E-08  | MMP16     |
| ENSGALG000000010156 | 274,63907 | -1,025083823 | 0,2479625 | -4,134028 | 3,56E-05  | 0,0003089 | DOCK8     |
| ENSGALG000000013124 | 3974,9034 | -1,026819624 | 0,1623011 | -6,326635 | 2,51E-10  | 6,40E-09  | FHOD3     |
| ENSGALG000000006138 | 2396,0525 | -1,026936244 | 0,150452  | -6,825674 | 8,75E-12  | 2,79E-10  | HELZ2     |
| ENSGALG000000010579 | 4573,0234 | -1,028169899 | 0,1257094 | -8,178939 | 2,86E-16  | 1,62E-14  | STON2     |
| ENSGALG000000012439 | 1314,5759 | -1,028638845 | 0,2279249 | -4,513061 | 6,39E-06  | 6,86E-05  | IGFBP3    |
| ENSGALG000000019077 | 11786,668 | -1,030078317 | 0,1385218 | -7,436218 | 1,04E-13  | 4,25E-12  |           |
| ENSGALG000000012522 | 26,038382 | -1,03063871  | 0,345927  | -2,979353 | 0,0028886 | 0,0127647 | PVALB     |
| ENSGALG000000000977 | 7324,7206 | -1,032464943 | 0,1097312 | -9,409039 | 5,01E-21  | 4,29E-19  | MAPKAP1   |
| ENSGALG000000016754 | 1717,8597 | -1,034769759 | 0,1770332 | -5,845059 | 5,06E-09  | 1,06E-07  | MGAT4A    |
| ENSGALG000000012412 | 7272,9925 | -1,036824012 | 0,1452529 | -7,138059 | 9,47E-13  | 3,47E-11  | MTHFD1L   |
| ENSGALG000000027213 | 84,217699 | -1,037130822 | 0,3364624 | -3,082456 | 0,002053  | 0,0096518 | ALX1      |
| ENSGALG000000007555 | 13407,29  | -1,038877738 | 0,1147853 | -9,050617 | 1,42E-19  | 1,11E-17  | CCND1     |
| ENSGALG000000025284 | 64,080075 | -1,04409147  | 0,3409884 | -3,061956 | 0,002199  | 0,0102076 |           |
| ENSGALG000000008465 | 8001,1338 | -1,045042375 | 0,1298809 | -8,046158 | 8,54E-16  | 4,60E-14  | SORCS1    |
| ENSGALG000000022800 | 1489,665  | -1,045072381 | 0,145669  | -7,174293 | 7,27E-13  | 2,72E-11  | KCNB2     |
| ENSGALG000000011336 | 49,782944 | -1,048887527 | 0,3535455 | -2,966768 | 0,0030095 | 0,0132004 | TECRL     |
| ENSGALG000000015008 | 37,265424 | -1,049053854 | 0,3418003 | -3,069201 | 0,0021463 | 0,0100076 | ZNF366    |
| ENSGALG000000023355 | 72,955518 | -1,050070076 | 0,34512   | -3,042623 | 0,0023453 | 0,0107547 | TMEM154   |
| ENSGALG000000017714 | 665,00414 | -1,052113718 | 0,2083331 | -5,050151 | 4,41E-07  | 6,20E-06  | FHAD1     |
| ENSGALG000000015975 | 5069,4191 | -1,056406602 | 0,1284565 | -8,223848 | 1,97E-16  | 1,13E-14  | DPY19L4   |
| ENSGALG000000011581 | 10286,837 | -1,059360643 | 0,338584  | -3,128797 | 0,0017552 | 0,0084616 | KIF26A    |
| ENSGALG000000015736 | 279,62808 | -1,060236168 | 0,3192341 | -3,321187 | 0,0008964 | 0,0048849 | STMN2     |
| ENSGALG000000003295 | 2261,7027 | -1,063705711 | 0,1585827 | -6,707576 | 1,98E-11  | 6,00E-10  | ADAMTS12  |
| ENSGALG000000009740 | 783,87139 | -1,063900656 | 0,1815827 | -5,859043 | 4,66E-09  | 9,86E-08  | RASGRP1   |
| ENSGALG000000013604 | 164,1582  | -1,065244459 | 0,2852669 | -3,734202 | 0,0001883 | 0,0012975 | VIP       |
| ENSGALG000000016470 | 856,35527 | -1,066533888 | 0,3521055 | -3,029018 | 0,0024535 | 0,0111534 | KCNS3     |
| ENSGALG000000011236 | 190,29168 | -1,070413941 | 0,315055  | -3,397546 | 0,0006799 | 0,0038831 | BEGAIN    |
| ENSGALG000000017135 | 1406,4237 | -1,071209509 | 0,1612008 | -6,645186 | 3,03E-11  | 8,92E-10  | CRYL1     |
| ENSGALG000000002988 | 7561,0439 | -1,072357906 | 0,152099  | -7,050395 | 1,78E-12  | 6,33E-11  | PHGDH     |
| ENSGALG000000001370 | 1171,2311 | -1,073396904 | 0,1915947 | -5,602436 | 2,11E-08  | 3,91E-07  | ADAMTS8   |
| ENSGALG000000010707 | 29,836376 | -1,074169362 | 0,351316  | -3,057559 | 0,0022315 | 0,0103145 | GPR68     |
| ENSGALG000000027757 | 10827,926 | -1,076478944 | 0,1080166 | -9,965866 | 2,15E-23  | 2,27E-21  | ARL4A     |
| ENSGALG000000010891 | 1573,4126 | -1,079203445 | 0,1845381 | -5,848133 | 4,97E-09  | 1,04E-07  | ABCB11    |
| ENSGALG000000027707 | 112,77294 | -1,082314729 | 0,3118106 | -3,471064 | 0,0005184 | 0,0030902 | ESM1      |
| ENSGALG000000016899 | 32,641313 | -1,08275528  | 0,3526736 | -3,070135 | 0,0021396 | 0,0099866 | DCT       |
| ENSGALG000000000177 | 4145,0213 | -1,083701806 | 0,1219668 | -8,885217 | 6,38E-19  | 4,70E-17  | KLF3      |
| ENSGALG000000025770 | 345,96122 | -1,089960517 | 0,2525089 | -4,316523 | 1,59E-05  | 0,0001532 |           |
| ENSGALG000000028046 | 6843,8734 | -1,098357134 | 0,1139847 | -9,636006 | 5,63E-22  | 5,11E-20  | INSIG2    |
| ENSGALG000000012917 | 4548,5783 | -1,102419391 | 0,1907106 | -5,780587 | 7,44E-09  | 1,50E-07  | CDH6      |
| ENSGALG000000005842 | 443,93623 | -1,104947048 | 0,2118757 | -5,215072 | 1,84E-07  | 2,80E-06  | GDPD2     |
| ENSGALG000000012095 | 202,10968 | -1,108243378 | 0,2716377 | -4,079858 | 4,51E-05  | 0,0003753 | C14orf105 |
| ENSGALG000000002518 | 128,6744  | -1,109129449 | 0,3369249 | -3,291919 | 0,0009951 | 0,0053108 |           |
| ENSGALG000000009567 | 5248,5052 | -1,113206952 | 0,1654659 | -6,727712 | 1,72E-11  | 5,27E-10  | TLL1      |
| ENSGALG000000011439 | 1241,3905 | -1,116853678 | 0,1622406 | -6,883936 | 5,82E-12  | 1,90E-10  | RBMS3     |
| ENSGALG000000013548 | 35,231247 | -1,118469658 | 0,3386376 | -3,302851 | 0,0009571 | 0,0051565 | GZMA      |
| ENSGALG000000014852 | 15743,642 | -1,119019515 | 0,1113638 | -10,04833 | 9,34E-24  | 1,05E-21  |           |
| ENSGALG000000009179 | 4347,973  | -1,119360692 | 0,1337923 | -8,366405 | 5,94E-17  | 3,63E-15  | TNFSF10   |
| ENSGALG000000011172 | 2541,5225 | -1,121518184 | 0,1274182 | -8,801871 | 1,35E-18  | 9,35E-17  | MYO10L    |
| ENSGALG000000013892 | 1340,4062 | -1,122648268 | 0,1612643 | -6,961542 | 3,37E-12  | 1,14E-10  | MAP3K5    |
| ENSGALG000000001079 | 117,89095 | -1,122757301 | 0,3356009 | -3,345513 | 0,0008213 | 0,0045345 | WNT3      |
| ENSGALG000000016680 | 793,76813 | -1,12428894  | 0,234202  | -4,80051  | 1,58E-06  | 1,97E-05  | TFAP2B    |
| ENSGALG000000008014 | 284,58059 | -1,126068911 | 0,2641663 | -4,262727 | 2,02E-05  | 0,0001892 | CEBPB     |
| ENSGALG000000006337 | 35,98151  | -1,128489411 | 0,3491935 | -3,231702 | 0,0012306 | 0,0063486 | K123      |
| ENSGALG000000020151 | 65,103733 | -1,129234483 | 0,3522369 | -3,205895 | 0,0013464 | 0,0068343 | NMU       |
| ENSGALG000000006376 | 107,4182  | -1,138122247 | 0,3273909 | -3,476341 | 0,0005083 | 0,0030393 | TMC3      |
| ENSGALG000000027210 | 288,32435 | -1,142415301 | 0,2380637 | -4,798779 | 1,60E-06  | 1,98E-05  |           |
| ENSGALG000000001085 | 2988,7865 | -1,143093103 | 0,1311931 | -8,71306  | 2,96E-18  | 1,98E-16  | ADGRG1    |
| ENSGALG000000001276 | 18773,518 | -1,144775826 | 0,131613  | -8,698048 | 3,38E-18  | 2,24E-16  | HOXB9     |
| ENSGALG000000004155 | 218,30979 | -1,147734088 | 0,2762334 | -4,154943 | 3,25E-05  | 0,0002845 | MYOM3     |

|                    |           |              |           |           |           |           |           |
|--------------------|-----------|--------------|-----------|-----------|-----------|-----------|-----------|
| ENSGALG00000027107 | 1206,9544 | -1,149521147 | 0,1567788 | -7,332123 | 2,27E-13  | 9,02E-12  | PROCA1    |
| ENSGALG00000014864 | 769,88057 | -1,150010609 | 0,170127  | -6,759718 | 1,38E-11  | 4,28E-10  | SMPDL3A   |
| ENSGALG00000027885 | 31,983561 | -1,151437329 | 0,3494378 | -3,295114 | 0,0009838 | 0,0052611 | C4orf19   |
| ENSGALG00000010926 | 145,65    | -1,152009571 | 0,3159768 | -3,645868 | 0,0002665 | 0,0017503 | SPP1      |
| ENSGALG00000008875 | 1752,669  | -1,156831558 | 0,1589922 | -7,276029 | 3,44E-13  | 1,34E-11  | PLCB1     |
| ENSGALG00000007268 | 3702,3293 | -1,168892699 | 0,1417063 | -8,248697 | 1,60E-16  | 9,28E-15  | CADPS     |
| ENSGALG00000006584 | 535,75964 | -1,169466644 | 0,2313724 | -5,054478 | 4,32E-07  | 6,07E-06  |           |
| ENSGALG00000016114 | 1343,2019 | -1,174926553 | 0,198016  | -5,933492 | 2,97E-09  | 6,53E-08  | TNFRSF11B |
| ENSGALG00000022871 | 818,02057 | -1,176605905 | 0,1867706 | -6,299737 | 2,98E-10  | 7,55E-09  | HHLA2     |
| ENSGALG00000026763 | 724,90274 | -1,177313255 | 0,2069483 | -5,688924 | 1,28E-08  | 2,48E-07  |           |
| ENSGALG00000017411 | 73,326206 | -1,17758282  | 0,3486458 | -3,377591 | 0,0007312 | 0,0041242 | RXFP3     |
| ENSGALG00000016998 | 449,62073 | -1,177970615 | 0,2144018 | -5,494221 | 3,92E-08  | 6,86E-07  |           |
| ENSGALG00000008941 | 29,808839 | -1,184874519 | 0,3508426 | -3,377225 | 0,0007322 | 0,0041263 | FEZF1     |
| ENSGALG00000002509 | 14719,435 | -1,185807324 | 0,1326958 | -8,936281 | 4,02E-19  | 2,98E-17  | COL5A2    |
| ENSGALG00000012357 | 5240,5441 | -1,187472008 | 0,1225271 | -9,691503 | 3,28E-22  | 3,16E-20  | CXCR4     |
| ENSGALG00000015665 | 1052,1425 | -1,188036426 | 0,1715856 | -6,923872 | 4,39E-12  | 1,45E-10  | SH3BP2    |
| ENSGALG00000005619 | 863,25589 | -1,189698364 | 0,2239703 | -5,311858 | 1,09E-07  | 1,73E-06  | F3        |
| ENSGALG00000005685 | 3302,1261 | -1,189953127 | 0,1570606 | -7,576394 | 3,55E-14  | 1,57E-12  | KSR1      |
| ENSGALG00000016083 | 216,72251 | -1,190269979 | 0,2711704 | -4,38938  | 1,14E-05  | 0,0001155 | ANGPT1    |
| ENSGALG00000000936 | 1054,1306 | -1,193444435 | 0,1573416 | -7,585055 | 3,32E-14  | 1,47E-12  | LMX1B     |
| ENSGALG00000006170 | 3710,8245 | -1,194070483 | 0,1488786 | -8,020428 | 1,05E-15  | 5,52E-14  | LRRC8C    |
| ENSGALG00000015433 | 4115,112  | -1,199115509 | 0,1254233 | -9,560547 | 1,17E-21  | 1,05E-19  | ABCA1     |
| ENSGALG00000002923 | 1146,0005 | -1,199213505 | 0,1576913 | -7,60482  | 2,85E-14  | 1,29E-12  |           |
| ENSGALG00000011104 | 29,588884 | -1,203717219 | 0,3516022 | -3,42352  | 0,0006182 | 0,0035829 | GCG       |
| ENSGALG00000012224 | 1928,9682 | -1,20528636  | 0,1513933 | -7,961295 | 1,70E-15  | 8,65E-14  | PDE1C     |
| ENSGALG00000003582 | 6407,4212 | -1,218636528 | 0,1784672 | -6,828349 | 8,59E-12  | 2,75E-10  | SLC1A3    |
| ENSGALG00000009667 | 660,39309 | -1,219318734 | 0,2495248 | -4,886564 | 1,03E-06  | 1,33E-05  | MFAP3L    |
| ENSGALG00000002632 | 1307,7165 | -1,220611399 | 0,1739574 | -7,016727 | 2,27E-12  | 7,93E-11  | CALCRL    |
| ENSGALG00000009215 | 122,78745 | -1,220936874 | 0,3057355 | -3,993442 | 6,51E-05  | 0,0005167 | PDE11A    |
| ENSGALG00000000141 | 479,97527 | -1,223136562 | 0,2587692 | -4,726747 | 2,28E-06  | 2,72E-05  | BLB1      |
| ENSGALG00000006473 | 340,04191 | -1,223226887 | 0,2654847 | -4,607524 | 4,07E-06  | 4,58E-05  | PLXNA4B   |
| ENSGALG00000007660 | 3604,7946 | -1,228207524 | 0,1637881 | -7,49876  | 6,44E-14  | 2,69E-12  | CHIC1     |
| ENSGALG00000013239 | 67578,529 | -1,231185989 | 0,1344215 | -9,159144 | 5,23E-20  | 4,24E-18  | NES       |
| ENSGALG00000008615 | 1056,6531 | -1,233824562 | 0,1860614 | -6,631275 | 3,33E-11  | 9,74E-10  | LTK       |
| ENSGALG00000003739 | 39854,675 | -1,237172502 | 0,1212391 | -10,2044  | 1,89E-24  | 2,28E-22  | SALL1     |
| ENSGALG00000029023 | 187,05762 | -1,242039059 | 0,2692492 | -4,612972 | 3,97E-06  | 4,48E-05  | DMRTB1    |
| ENSGALG00000009532 | 9821,7952 | -1,242374232 | 0,113576  | -10,9387  | 7,53E-28  | 1,13E-25  | GXYLT1    |
| ENSGALG00000011867 | 2059,3195 | -1,242989678 | 0,1421856 | -8,742025 | 2,29E-18  | 1,56E-16  | SERHL2    |
| ENSGALG00000005427 | 736,09619 | -1,25622691  | 0,1850037 | -6,790278 | 1,12E-11  | 3,51E-10  |           |
| ENSGALG00000013237 | 693,51796 | -1,260226776 | 0,2152859 | -5,853736 | 4,81E-09  | 1,01E-07  | BCAN      |
| ENSGALG00000010858 | 12929,131 | -1,268608971 | 0,3211828 | -3,949803 | 7,82E-05  | 0,0006051 | LRP2      |
| ENSGALG00000003353 | 12512,084 | -1,269046359 | 0,175098  | -7,247634 | 4,24E-13  | 1,63E-11  | RAI14     |
| ENSGALG00000019552 | 24,982545 | -1,269295425 | 0,3440776 | -3,688981 | 0,0002252 | 0,0015146 | SERPINB2  |
| ENSGALG00000004361 | 87800,454 | -1,276561341 | 0,1268377 | -10,06452 | 7,93E-24  | 8,99E-22  | PRTG      |
| ENSGALG00000008352 | 151,36281 | -1,283975751 | 0,2919953 | -4,397248 | 1,10E-05  | 0,0001121 | CKMT1A    |
| ENSGALG00000002397 | 837,30231 | -1,291814757 | 0,2176946 | -5,934069 | 2,96E-09  | 6,52E-08  | PSPH      |
| ENSGALG00000006401 | 4187,8898 | -1,299022844 | 0,1294305 | -10,03645 | 1,05E-23  | 1,16E-21  | OSBPL5    |
| ENSGALG00000014866 | 52452,789 | -1,312013425 | 0,1313405 | -9,989404 | 1,70E-23  | 1,83E-21  | FABP7     |
| ENSGALG00000005442 | 270,98777 | -1,327990169 | 0,2831728 | -4,689682 | 2,74E-06  | 3,20E-05  | PALMD     |
| ENSGALG00000016602 | 1659,682  | -1,339565689 | 0,1637218 | -8,181961 | 2,79E-16  | 1,58E-14  | ARHGAP6   |
| ENSGALG00000021879 | 40,043275 | -1,34129965  | 0,3484949 | -3,848836 | 0,0001187 | 0,0008659 |           |
| ENSGALG00000002443 | 492,98343 | -1,353430658 | 0,2272211 | -5,956448 | 2,58E-09  | 5,77E-08  | FBXL16    |
| ENSGALG00000007771 | 2716,4461 | -1,353742442 | 0,1514834 | -8,936574 | 4,01E-19  | 2,98E-17  | FAM210B   |
| ENSGALG00000008491 | 3635,9278 | -1,354708919 | 0,1393335 | -9,72278  | 2,41E-22  | 2,38E-20  | XIAP      |
| ENSGALG00000009947 | 4729,0815 | -1,358616298 | 0,1191908 | -11,39867 | 4,25E-30  | 7,32E-28  | PLEKHH2   |
| ENSGALG00000001346 | 421,97082 | -1,362109597 | 0,2357782 | -5,77708  | 7,60E-09  | 1,53E-07  |           |
| ENSGALG00000028048 | 17805,974 | -1,362450241 | 0,1038968 | -13,1135  | 2,76E-39  | 8,73E-37  | PTN       |
| ENSGALG00000028047 | 613,76602 | -1,369008166 | 0,2271663 | -6,026458 | 1,68E-09  | 3,86E-08  | RHOV      |
| ENSGALG00000010148 | 96,068007 | -1,379685752 | 0,3285947 | -4,198746 | 2,68E-05  | 0,0002417 | PTPRR     |
| ENSGALG00000003706 | 2880,2185 | -1,390323026 | 0,1522007 | -9,134799 | 6,55E-20  | 5,25E-18  | DUSP1     |
| ENSGALG00000009405 | 351,46777 | -1,391691484 | 0,2252283 | -6,179026 | 6,45E-10  | 1,57E-08  | GRIA2     |
| ENSGALG00000014983 | 1427,7077 | -1,39278689  | 0,1752564 | -7,947137 | 1,91E-15  | 9,66E-14  | F2R       |

|                    |           |              |           |           |          |           |         |
|--------------------|-----------|--------------|-----------|-----------|----------|-----------|---------|
| ENSGALG00000002993 | 1938,9589 | -1,397301236 | 0,1581691 | -8,834225 | 1,01E-18 | 7,22E-17  | CA10    |
| ENSGALG00000015256 | 9909,979  | -1,397562325 | 0,1233891 | -11,32647 | 9,70E-30 | 1,61E-27  | PAM     |
| ENSGALG00000003114 | 426,74171 | -1,398035927 | 0,2162026 | -6,466322 | 1,00E-10 | 2,72E-09  | NOG     |
| ENSGALG00000011306 | 2909,7094 | -1,403496478 | 0,1324006 | -10,60038 | 2,97E-26 | 4,17E-24  | DES     |
| ENSGALG00000027133 | 162,08932 | -1,405319409 | 0,31973   | -4,395332 | 1,11E-05 | 0,000113  | CD83    |
| ENSGALG00000001768 | 6648,8124 | -1,406520646 | 0,156826  | -8,968671 | 3,00E-19 | 2,27E-17  | TENM2   |
| ENSGALG00000005123 | 593,9961  | -1,408198856 | 0,2224863 | -6,329374 | 2,46E-10 | 6,31E-09  | WNT7A   |
| ENSGALG00000000680 | 6447,7598 | -1,411570576 | 0,1125835 | -12,53799 | 4,63E-36 | 1,19E-33  | NUAK2   |
| ENSGALG00000009530 | 697,31067 | -1,411853584 | 0,1982451 | -7,121758 | 1,07E-12 | 3,88E-11  | PDZRN4  |
| ENSGALG00000014343 | 783,22971 | -1,412639292 | 0,1787261 | -7,903934 | 2,70E-15 | 1,32E-13  | ARAP2   |
| ENSGALG00000026557 | 168,82638 | -1,412974627 | 0,2911389 | -4,853266 | 1,21E-06 | 1,55E-05  | PGF     |
| ENSGALG00000011319 | 10478,782 | -1,42017882  | 0,126589  | -11,21882 | 3,30E-29 | 5,34E-27  | LPHN3   |
| ENSGALG00000014823 | 40,51625  | -1,422401118 | 0,3456571 | -4,115064 | 3,87E-05 | 0,0003312 | C6orf58 |
| ENSGALG00000011468 | 1760,2982 | -1,424650779 | 0,1875286 | -7,596979 | 3,03E-14 | 1,36E-12  | IGFBP5  |
| ENSGALG00000016297 | 52,464778 | -1,427639697 | 0,3539064 | -4,033947 | 5,48E-05 | 0,0004458 | HCRT2   |
| ENSGALG00000019054 | 529,71662 | -1,427749976 | 0,2415069 | -5,911839 | 3,38E-09 | 7,38E-08  | NAALAD2 |
| ENSGALG00000011110 | 296,25723 | -1,431359085 | 0,2488071 | -5,752887 | 8,77E-09 | 1,75E-07  | DPP4    |
| ENSGALG00000011207 | 13680,733 | -1,434035643 | 0,1207094 | -11,88007 | 1,50E-32 | 3,30E-30  | DUSP6   |
| ENSGALG00000012018 | 2349,8518 | -1,435600968 | 0,1869145 | -7,680524 | 1,58E-14 | 7,29E-13  | UGT8    |
| ENSGALG00000013402 | 51,692715 | -1,446510354 | 0,3538534 | -4,087881 | 4,35E-05 | 0,0003636 | AHRR    |
| ENSGALG00000011164 | 2326,4168 | -1,446841804 | 0,2083124 | -6,945539 | 3,77E-12 | 1,26E-10  | CHN2    |
| ENSGALG00000028821 | 11178,852 | -1,46102831  | 0,1488545 | -9,815142 | 9,69E-23 | 9,70E-21  | GLIPR2  |
| ENSGALG00000001169 | 20569,632 | -1,469628578 | 0,1453759 | -10,10916 | 5,03E-24 | 5,85E-22  | CRB2    |
| ENSGALG00000006072 | 43,451296 | -1,471939488 | 0,3539382 | -4,158747 | 3,20E-05 | 0,0002809 | SCN10A  |
| ENSGALG00000005855 | 6149,8313 | -1,488520056 | 0,1624534 | -9,162749 | 5,06E-20 | 4,12E-18  | CA5B    |
| ENSGALG00000026262 | 5433,5657 | -1,4922838   | 0,1545273 | -9,657086 | 4,59E-22 | 4,25E-20  | PMP22   |
| ENSGALG00000001621 | 458,45489 | -1,495017381 | 0,2209806 | -6,765379 | 1,33E-11 | 4,12E-10  | CLDN5   |
| ENSGALG00000011940 | 614,50292 | -1,496267605 | 0,2191218 | -6,828475 | 8,58E-12 | 2,75E-10  | CCK     |
| ENSGALG00000008978 | 15989,385 | -1,505709648 | 0,1318417 | -11,42059 | 3,30E-30 | 5,76E-28  | ITGA4   |
| ENSGALG00000025773 | 391,15903 | -1,506718569 | 0,2193821 | -6,868009 | 6,51E-12 | 2,11E-10  |         |
| ENSGALG00000015388 | 3557,5816 | -1,507384513 | 0,1325751 | -11,37004 | 5,90E-30 | 1,00E-27  | PRDM1   |
| ENSGALG00000007171 | 156,08231 | -1,518198388 | 0,2937383 | -5,168541 | 2,36E-07 | 3,50E-06  | CIITA   |
| ENSGALG00000010258 | 1087,7077 | -1,528410178 | 0,2320488 | -6,58659  | 4,50E-11 | 1,28E-09  | LTBP2   |
| ENSGALG00000006084 | 149,65329 | -1,531133293 | 0,3082185 | -4,967689 | 6,78E-07 | 9,10E-06  | WNT8A   |
| ENSGALG00000005499 | 52125,792 | -1,531899327 | 0,1548752 | -9,891183 | 4,55E-23 | 4,65E-21  | IL17RD  |
| ENSGALG00000001383 | 88,961213 | -1,543511015 | 0,3420022 | -4,513161 | 6,39E-06 | 6,86E-05  | HTR4    |
| ENSGALG00000017179 | 397,23584 | -1,548130217 | 0,2756174 | -5,616954 | 1,94E-08 | 3,65E-07  | PDGFD   |
| ENSGALG00000000388 | 10384,966 | -1,555950834 | 0,1505748 | -10,33341 | 4,98E-25 | 6,33E-23  | LIN28A  |
| ENSGALG00000016293 | 1486,8847 | -1,561397543 | 0,1523922 | -10,24591 | 1,23E-24 | 1,51E-22  | BMP5    |
| ENSGALG00000014657 | 1240,6807 | -1,561923173 | 0,2131383 | -7,328215 | 2,33E-13 | 9,26E-12  | ADGRV1  |
| ENSGALG00000003957 | 1745,618  | -1,565814231 | 0,1495869 | -10,46759 | 1,22E-25 | 1,66E-23  | APOH    |
| ENSGALG00000017242 | 1988,3309 | -1,579394776 | 0,1359327 | -11,61895 | 3,30E-31 | 6,42E-29  | FZD4    |
| ENSGALG00000009170 | 1955,3023 | -1,581054934 | 0,1355952 | -11,66011 | 2,04E-31 | 4,02E-29  | NCEH1   |
| ENSGALG00000003323 | 100,58975 | -1,591926379 | 0,3209027 | -4,960776 | 7,02E-07 | 9,41E-06  | OSGIN1  |
| ENSGALG00000001645 | 733,71496 | -1,608468631 | 0,2050944 | -7,842576 | 4,41E-15 | 2,10E-13  | KCNT1   |
| ENSGALG00000011609 | 3466,2373 | -1,61436812  | 0,3265448 | -4,943788 | 7,66E-07 | 1,02E-05  | ABTB2   |
| ENSGALG00000003126 | 1209,6364 | -1,615974863 | 0,1617448 | -9,990893 | 1,67E-23 | 1,82E-21  | ERBB4   |
| ENSGALG00000019716 | 86,528621 | -1,618712644 | 0,3285879 | -4,926269 | 8,38E-07 | 1,10E-05  | KRT20   |
| ENSGALG00000016102 | 256,08529 | -1,630912312 | 0,2481459 | -6,572392 | 4,95E-11 | 1,41E-09  | CYP26B1 |
| ENSGALG00000010468 | 1107,4297 | -1,6309453   | 0,1573602 | -10,36441 | 3,60E-25 | 4,67E-23  | ISM2    |
| ENSGALG00000023521 | 1102,9061 | -1,651708778 | 0,1982919 | -8,329684 | 8,11E-17 | 4,84E-15  | ADRA2A  |
| ENSGALG00000019261 | 1018,7346 | -1,655584971 | 0,2240687 | -7,388737 | 1,48E-13 | 6,04E-12  | ARHGAP8 |
| ENSGALG00000026892 | 80,007612 | -1,6734567   | 0,3494002 | -4,789512 | 1,67E-06 | 2,06E-05  |         |
| ENSGALG00000008353 | 2780,0954 | -1,679225856 | 0,1922691 | -8,733726 | 2,46E-18 | 1,67E-16  | MAGI2   |
| ENSGALG00000006997 | 745,7891  | -1,684979264 | 0,1736039 | -9,705885 | 2,85E-22 | 2,77E-20  | BRINP1  |
| ENSGALG00000029175 | 12384,251 | -1,685259625 | 0,1660405 | -10,14969 | 3,32E-24 | 3,90E-22  | EFNB2   |
| ENSGALG00000008918 | 724,31518 | -1,685987772 | 0,1865069 | -9,039814 | 1,57E-19 | 1,22E-17  | LAMP5   |
| ENSGALG00000014930 | 4308,5867 | -1,696897635 | 0,1564042 | -10,84944 | 2,01E-27 | 2,94E-25  | ENC1    |
| ENSGALG00000005498 | 1151,8463 | -1,707286081 | 0,2153293 | -7,928721 | 2,21E-15 | 1,11E-13  |         |
| ENSGALG00000014235 | 549,44433 | -1,721709963 | 0,2641679 | -6,517485 | 7,15E-11 | 1,99E-09  | WNT7B   |
| ENSGALG00000013102 | 1811,9189 | -1,724325032 | 0,1396681 | -12,34587 | 5,13E-35 | 1,25E-32  | COBL    |
| ENSGALG00000007218 | 6209,2721 | -1,732428983 | 0,1735379 | -9,982999 | 1,81E-23 | 1,94E-21  | MB21D2  |

|                    |           |              |           |           |          |          |          |
|--------------------|-----------|--------------|-----------|-----------|----------|----------|----------|
| ENSGALG00000014908 | 2604,0347 | -1,732825245 | 0,1633068 | -10,61086 | 2,65E-26 | 3,76E-24 | FST      |
| ENSGALG00000005476 | 213,71162 | -1,752170936 | 0,3180675 | -5,508801 | 3,61E-08 | 6,35E-07 | PTH1R    |
| ENSGALG00000011148 | 2471,4965 | -1,754606037 | 0,1499315 | -11,70272 | 1,23E-31 | 2,51E-29 | HHIPL1   |
| ENSGALG00000027874 | 793,36454 | -1,754956403 | 0,232655  | -7,54317  | 4,59E-14 | 1,97E-12 | CHAC1    |
| ENSGALG00000012635 | 1110,8535 | -1,755097361 | 0,1664549 | -10,54398 | 5,42E-26 | 7,45E-24 | BTBD11   |
| ENSGALG00000006995 | 175,82725 | -1,759714805 | 0,3023936 | -5,819285 | 5,91E-09 | 1,22E-07 | APOD     |
| ENSGALG00000027316 | 126,11379 | -1,764476803 | 0,3121114 | -5,653356 | 1,57E-08 | 3,00E-07 | CRNN     |
| ENSGALG00000005519 | 2075,7509 | -1,767947956 | 0,3335103 | -5,30103  | 1,15E-07 | 1,82E-06 | TLL2     |
| ENSGALG00000009282 | 5108,519  | -1,769054515 | 0,16415   | -10,77706 | 4,42E-27 | 6,40E-25 | ELMSAN1  |
| ENSGALG00000007113 | 2619,5663 | -1,77145981  | 0,1909494 | -9,277115 | 1,74E-20 | 1,45E-18 | TNC      |
| ENSGALG00000015148 | 101,3242  | -1,772924708 | 0,3468771 | -5,111103 | 3,20E-07 | 4,62E-06 | ANXA1    |
| ENSGALG00000023406 | 3748,5665 | -1,774894708 | 0,1767754 | -10,04039 | 1,01E-23 | 1,12E-21 |          |
| ENSGALG00000004930 | 259,83629 | -1,782009807 | 0,3260345 | -5,465709 | 4,61E-08 | 7,94E-07 | HRH1     |
| ENSGALG00000009920 | 1810,7316 | -1,80046145  | 0,2059481 | -8,742306 | 2,28E-18 | 1,56E-16 | COCH     |
| ENSGALG00000014159 | 18203,792 | -1,81424576  | 0,1061679 | -17,08846 | 1,81E-65 | 1,30E-62 | PAC SIN2 |
| ENSGALG00000016875 | 1624,3852 | -1,825016077 | 0,1855323 | -9,836647 | 7,83E-23 | 7,89E-21 | CLYBL    |
| ENSGALG00000004306 | 1596,7644 | -1,830041848 | 0,1566925 | -11,67919 | 1,63E-31 | 3,26E-29 | SYT12    |
| ENSGALG00000011708 | 13494,005 | -1,833902608 | 0,1212478 | -15,12524 | 1,10E-51 | 6,01E-49 | MYLK     |
| ENSGALG00000002714 | 18305,731 | -1,839377527 | 0,1231358 | -14,93779 | 1,87E-50 | 9,10E-48 | TMEM132C |
| ENSGALG00000007963 | 269,37035 | -1,84239576  | 0,2523089 | -7,302143 | 2,83E-13 | 1,11E-11 | NFATC2   |
| ENSGALG00000014935 | 24043,958 | -1,864724119 | 0,1640609 | -11,36605 | 6,17E-30 | 1,04E-27 | GREB1L   |
| ENSGALG00000015089 | 1244,3881 | -1,867848339 | 0,2166645 | -8,620924 | 6,64E-18 | 4,39E-16 | GAP43    |
| ENSGALG00000016906 | 16521,342 | -1,870006943 | 0,1023605 | -18,26883 | 1,47E-74 | 2,00E-71 | SPRY2    |
| ENSGALG00000012392 | 124,6248  | -1,879813042 | 0,3053078 | -6,157108 | 7,41E-10 | 1,79E-08 | IYD      |
| ENSGALG00000007786 | 809,87356 | -1,895122662 | 0,2583339 | -7,335942 | 2,20E-13 | 8,79E-12 | DOK5     |
| ENSGALG00000003437 | 453,52356 | -1,896224168 | 0,2236049 | -8,480244 | 2,25E-17 | 1,43E-15 | ADAM8    |
| ENSGALG00000009693 | 162,98636 | -1,908196694 | 0,2849148 | -6,69743  | 2,12E-11 | 6,38E-10 | CPXM2    |
| ENSGALG00000026366 | 659,49696 | -1,956428809 | 0,2559307 | -7,644371 | 2,10E-14 | 9,56E-13 | TTN      |
| ENSGALG00000016377 | 39318,721 | -1,984049771 | 0,1516015 | -13,08727 | 3,89E-39 | 1,20E-36 | PXDN     |
| ENSGALG00000007646 | 1162,4308 | -1,999886692 | 0,2341543 | -8,540893 | 1,33E-17 | 8,72E-16 |          |
| ENSGALG00000014727 | 707,4954  | -2,02826974  | 0,2257943 | -8,982819 | 2,64E-19 | 2,02E-17 | PDE4D    |
| ENSGALG00000025941 | 508,27465 | -2,032822244 | 0,2108225 | -9,642339 | 5,30E-22 | 4,84E-20 | RGS20    |
| ENSGALG00000016455 | 36148,301 | -2,034647249 | 0,1415614 | -14,37289 | 7,66E-47 | 3,07E-44 | GREB1    |
| ENSGALG00000015332 | 1189,9865 | -2,044938557 | 0,2318737 | -8,819191 | 1,15E-18 | 8,09E-17 | CPLX1    |
| ENSGALG00000001608 | 473,98158 | -2,081100043 | 0,2297131 | -9,059563 | 1,31E-19 | 1,03E-17 | UNC5D    |
| ENSGALG00000006797 | 719,73345 | -2,093089949 | 0,1825483 | -11,46595 | 1,96E-30 | 3,60E-28 | ADARB2   |
| ENSGALG00000005347 | 2547,968  | -2,102469906 | 0,1728132 | -12,16614 | 4,71E-34 | 1,11E-31 | ADAMTS18 |
| ENSGALG00000005061 | 4294,1757 | -2,114741441 | 0,1575348 | -13,42396 | 4,38E-41 | 1,53E-38 | PPM1E    |
| ENSGALG00000006822 | 6099,6969 | -2,117548167 | 0,190863  | -11,0946  | 1,33E-28 | 2,06E-26 | PCDH19   |
| ENSGALG00000002540 | 1690,5022 | -2,132167559 | 0,1444055 | -14,76514 | 2,46E-49 | 1,08E-46 | RGS2     |
| ENSGALG00000014872 | 706,84998 | -2,137267919 | 0,2117349 | -10,09407 | 5,87E-24 | 6,77E-22 | FGF10    |
| ENSGALG00000005000 | 10982,035 | -2,158647655 | 0,1512305 | -14,27389 | 3,18E-46 | 1,24E-43 | COMTD1   |
| ENSGALG00000002816 | 1397,7493 | -2,170634895 | 0,1725497 | -12,57976 | 2,73E-36 | 7,28E-34 | STK10    |
| ENSGALG00000024083 | 2014,3842 | -2,175833689 | 0,1641192 | -13,25765 | 4,07E-40 | 1,39E-37 | C8orf4   |
| ENSGALG00000017244 | 1712,4698 | -2,189436741 | 0,1475328 | -14,84034 | 8,03E-50 | 3,65E-47 | PRSS23   |
| ENSGALG00000012106 | 326,65016 | -2,236831516 | 0,2846604 | -7,857895 | 3,91E-15 | 1,87E-13 | SCTR     |
| ENSGALG00000005689 | 443,46806 | -2,271345118 | 0,2372034 | -9,575515 | 1,01E-21 | 9,14E-20 | PAX2     |
| ENSGALG00000000600 | 217,11331 | -2,27272638  | 0,2827556 | -8,037777 | 9,15E-16 | 4,85E-14 | PTPN7    |
| ENSGALG00000019426 | 136,01564 | -2,280006749 | 0,3003394 | -7,591434 | 3,16E-14 | 1,41E-12 | TMEM71   |
| ENSGALG00000012594 | 465,97876 | -2,283939186 | 0,2248463 | -10,15778 | 3,06E-24 | 3,62E-22 | NTRK2    |
| ENSGALG00000012732 | 358,70918 | -2,298252682 | 0,2277106 | -10,09287 | 5,94E-24 | 6,80E-22 | PHACTR1  |
| ENSGALG00000004376 | 1102,6462 | -2,323750078 | 0,1982175 | -11,72323 | 9,69E-32 | 2,00E-29 | KCNJ2    |
| ENSGALG00000008118 | 2184,0618 | -2,340544818 | 0,1326409 | -17,64572 | 1,10E-69 | 1,15E-66 | RFTN2    |
| ENSGALG00000010435 | 1040,6262 | -2,340611141 | 0,2214259 | -10,57063 | 4,08E-26 | 5,66E-24 | RASGRP3  |
| ENSGALG00000007346 | 9971,3513 | -2,361764382 | 0,1565921 | -15,08227 | 2,12E-51 | 1,11E-48 | KIAA1462 |
| ENSGALG00000017091 | 828,29835 | -2,363903034 | 0,1707454 | -13,84461 | 1,37E-43 | 5,05E-41 | FLT1     |
| ENSGALG00000012278 | 11240,166 | -2,383840075 | 0,163892  | -14,54519 | 6,27E-48 | 2,67E-45 | EMCN     |
| ENSGALG00000016785 | 93,113308 | -2,405348378 | 0,3296339 | -7,297029 | 2,94E-13 | 1,15E-11 | IL1RL1   |
| ENSGALG00000013033 | 107,44587 | -2,410715686 | 0,3195602 | -7,543854 | 4,56E-14 | 1,97E-12 | CMBL     |
| ENSGALG00000007657 | 4917,8686 | -2,412172788 | 0,3343808 | -7,213849 | 5,44E-13 | 2,06E-11 | CDX4     |
| ENSGALG00000012927 | 231,31802 | -2,419967236 | 0,2657891 | -9,104839 | 8,64E-20 | 6,84E-18 | CDH10    |
| ENSGALG00000002183 | 431,19833 | -2,438499895 | 0,2660795 | -9,164552 | 4,98E-20 | 4,08E-18 | PRR16    |



|                    |           |              |           |           |           |           |             |
|--------------------|-----------|--------------|-----------|-----------|-----------|-----------|-------------|
| ENSGALG00000015947 | 963,91091 | -2,438977585 | 0,1891685 | -12,89315 | 4,92E-38  | 1,46E-35  | CDH17       |
| ENSGALG00000008893 | 301,74621 | -2,444595373 | 0,2469193 | -9,900382 | 4,15E-23  | 4,31E-21  | SYT4        |
| ENSGALG00000008890 | 114,85977 | -2,449553325 | 0,3261648 | -7,51017  | 5,91E-14  | 2,49E-12  | ADGRL4      |
| ENSGALG00000008905 | 317,21852 | -2,456637668 | 0,2373167 | -10,35173 | 4,11E-25  | 5,28E-23  | HABP2       |
| ENSGALG00000026663 | 524,42245 | -2,478656591 | 0,2092266 | -11,84675 | 2,24E-32  | 4,76E-30  |             |
| ENSGALG00000012623 | 104,28468 | -2,482707417 | 0,3217829 | -7,715473 | 1,21E-14  | 5,58E-13  | CFC1B       |
| ENSGALG00000015826 | 274,53091 | -2,484029553 | 0,3182796 | -7,804553 | 5,97E-15  | 2,81E-13  | HTR1E       |
| ENSGALG00000010224 | 221,98807 | -2,486198557 | 0,2911733 | -8,538554 | 1,36E-17  | 8,83E-16  | GLIPR1L     |
| ENSGALG00000007940 | 128,05228 | -2,542363859 | 0,32048   | -7,932988 | 2,14E-15  | 1,07E-13  | RAG2        |
| ENSGALG00000001560 | 195,37323 | -2,555527127 | 0,3382967 | -7,554101 | 4,22E-14  | 1,83E-12  | KCNU1       |
| ENSGALG00000008581 | 16731,944 | -2,566439645 | 0,1474527 | -17,40517 | 7,54E-68  | 5,70E-65  | DUSP5       |
| ENSGALG00000016784 | 1039,8515 | -2,607549769 | 0,1741423 | -14,97367 | 1,09E-50  | 5,50E-48  | IL1RL2      |
| ENSGALG00000006112 | 988,65304 | -2,692857061 | 0,1899063 | -14,17993 | 1,22E-45  | 4,61E-43  | SCN5A       |
| ENSGALG00000016154 | 140,89016 | -2,742713554 | 0,306496  | -8,948611 | 3,60E-19  | 2,71E-17  | ARC         |
| ENSGALG00000016145 | 1265,1012 | -2,754137035 | 0,1745953 | -15,7744  | 4,67E-56  | 2,76E-53  | RIPK4       |
| ENSGALG00000011099 | 581,91676 | -2,760215905 | 0,269967  | -10,22427 | 1,54E-24  | 1,88E-22  | FAP         |
| ENSGALG00000005209 | 4151,2431 | -2,791291062 | 0,3487778 | -8,003063 | 1,21E-15  | 6,28E-14  | RP5-877J2.1 |
| ENSGALG00000011562 | 1031,64   | -2,817896047 | 0,1809122 | -15,57604 | 1,06E-54  | 6,01E-52  | PARK2       |
| ENSGALG00000007656 | 17151,759 | -2,823200316 | 0,3012681 | -9,371057 | 7,18E-21  | 6,11E-19  |             |
| ENSGALG00000012051 | 829,36725 | -2,878544854 | 0,2482483 | -11,59542 | 4,35E-31  | 8,22E-29  | STAC        |
| ENSGALG00000028250 | 102,79679 | -2,884651456 | 0,3308091 | -8,719988 | 2,78E-18  | 1,88E-16  | ANKRD22     |
| ENSGALG00000007701 | 2491,5718 | -2,906313035 | 0,1654067 | -17,57071 | 4,13E-69  | 3,75E-66  | B3GNT7      |
| ENSGALG00000014984 | 5902,5896 | -2,931476354 | 0,1495694 | -19,59944 | 1,56E-85  | 3,04E-82  | F2RL1       |
| ENSGALG00000009704 | 18346,867 | -2,934403789 | 0,1676164 | -17,50666 | 1,27E-68  | 1,02E-65  | CHST15      |
| ENSGALG00000016140 | 355,67412 | -2,998033733 | 0,2492573 | -12,02787 | 2,54E-33  | 5,76E-31  | FAM3B       |
| ENSGALG00000015358 | 3246,1808 | -3,063209848 | 0,145761  | -21,0153  | 4,75E-98  | 1,29E-94  | MYH15       |
| ENSGALG00000002562 | 2027,1289 | -3,12939254  | 0,1764516 | -17,73513 | 2,25E-70  | 2,55E-67  | ARAP3       |
| ENSGALG00000007538 | 106,89217 | -3,275953369 | 0,3461412 | -9,464212 | 2,96E-21  | 2,60E-19  | IRG1L       |
| ENSGALG00000022962 | 106,15694 | -3,362304357 | 0,3346563 | -10,04704 | 9,47E-24  | 1,06E-21  | OVST        |
| ENSGALG00000002594 | 1003,2406 | -3,661637709 | 0,2050909 | -17,85373 | 2,70E-71  | 3,35E-68  | TFPI        |
| ENSGALG00000013624 | 4838,4306 | -3,6799039   | 0,1462758 | -25,15731 | 1,18E-139 | 5,34E-136 | FAM65B      |
| ENSGALG00000006421 | 916,75433 | -3,742853665 | 0,2370467 | -15,78952 | 3,67E-56  | 2,27E-53  | SLC16A12    |
| ENSGALG00000020359 | 246,79437 | -3,821393345 | 0,2845023 | -13,43185 | 3,93E-41  | 1,41E-38  | SIX6        |
| ENSGALG00000003456 | 187,12467 | -3,934712358 | 0,3247803 | -12,115   | 8,80E-34  | 2,03E-31  | CA12        |
| ENSGALG00000023379 | 453,27145 | -3,949811074 | 0,2313834 | -17,07042 | 2,46E-65  | 1,68E-62  | F2RL2       |
| ENSGALG00000016431 | 670,26005 | -4,37340061  | 0,2358196 | -18,54553 | 8,86E-77  | 1,34E-73  | PAX5        |
| ENSGALG00000014994 | 310,70765 | -5,043766073 | 0,2868267 | -17,58472 | 3,23E-69  | 3,14E-66  | CRHBP       |
| ENSGALG00000016783 | 9121,1085 | -5,301446621 | 0,1450351 | -36,55285 | 1,61E-292 | 2,19E-288 | IL1R1       |
| ENSGALG00000004221 | 898,01485 | -5,338632777 | 0,2699166 | -19,77882 | 4,53E-87  | 1,03E-83  | IL22RA1     |
