# Supplementary material for: HOXB8 Counteracts MAPK/ERK Oncogenic Signaling in a Chicken Embryo Model of Neoplasia
Source: MDPI journal article supplement (doi:10.3390/ijms22168911), 2021-08-18
Supplement: s1 [file s1]

Table S2: MEK1ca vs pCIG differentially regulated genes (False Discovery Rate (padj) <= 0.01).

| ID                 | baseMean   | log2FoldChange | lfcSE      | stat       | pvalue    | padj      | Symbol   |
|--------------------|------------|----------------|------------|------------|-----------|-----------|----------|
| ENSGALG00000016783 | 8238,73046 | 6,569509059    | 0,14790027 | 44,4185063 | 0         | 0         | IL1R1    |
| ENSGALG00000026862 | 13555,7342 | 4,954899999    | 0,09919193 | 49,9526499 | 0         | 0         | CLDN1    |
| ENSGALG00000013624 | 4270,69482 | 4,748606334    | 0,13766019 | 34,4951317 | 9,49E-261 | 3,96E-257 | FAM65b   |
| ENSGALG00000007701 | 2111,8366  | 4,453082303    | 0,15415453 | 28,8871327 | 1,73E-183 | 5,42E-180 | B3GNT7   |
| ENSGALG00000023406 | 2791,74825 | 4,424329106    | 0,17768451 | 24,899914  | 7,46E-137 | 1,04E-133 | NKX1-2   |
| ENSGALG00000004221 | 826,015749 | 4,334100391    | 0,24063814 | 18,0108626 | 1,60E-72  | 9,10E-70  | IL22RA1  |
| ENSGALG00000026263 | 1163,05249 | 4,280447225    | 0,16395242 | 26,107863  | 2,97E-150 | 5,30E-147 | RGS8     |
| ENSGALG00000016431 | 614,504481 | 4,191515764    | 0,19877752 | 21,0864675 | 1,06E-98  | 1,02E-95  | Pax5     |
| ENSGALG00000006421 | 822,905958 | 4,186231336    | 0,20967318 | 19,9655067 | 1,10E-88  | 8,59E-86  | SLC16A12 |
| ENSGALG00000014994 | 285,756349 | 4,160137851    | 0,2463521  | 16,886959  | 5,61E-64  | 2,51E-61  | CRHBP    |
| ENSGALG00000016145 | 1063,31727 | 3,924548833    | 0,20804729 | 18,8637341 | 2,27E-79  | 1,35E-76  | RIPK4    |
| ENSGALG00000016906 | 12704,3465 | 3,743251462    | 0,13733846 | 27,2556682 | 1,42E-163 | 3,56E-160 | SPRY2    |
| ENSGALG00000020359 | 223,508759 | 3,572883143    | 0,25377029 | 14,0792017 | 5,10E-45  | 1,39E-42  | SIX6     |
| ENSGALG00000023379 | 414,317659 | 3,494464883    | 0,23081766 | 15,139504  | 8,89E-52  | 3,09E-49  | F2RL2    |
| ENSGALG00000010435 | 869,92769  | 3,471549614    | 0,19291102 | 17,9956001 | 2,11E-72  | 1,15E-69  | RASGRP3  |
| ENSGALG00000007656 | 15062,1816 | 3,445291545    | 0,25219864 | 13,6610236 | 1,74E-42  | 4,43E-40  | CDX-1    |
| ENSGALG00000005519 | 1750,48505 | 3,391598976    | 0,19583928 | 17,3182775 | 3,42E-67  | 1,65E-64  | TLL2     |
| ENSGALG00000026663 | 441,393045 | 3,38430006     | 0,21308555 | 15,8823535 | 8,40E-57  | 3,18E-54  | CX3CL1   |
| ENSGALG00000002562 | 1820,09922 | 3,3452383      | 0,1690746  | 19,785576  | 3,96E-87  | 2,92E-84  | ARAP3    |
| ENSGALG00000008905 | 264,878628 | 3,342984543    | 0,2406955  | 13,8888536 | 7,40E-44  | 1,93E-41  | HABP2    |
| ENSGALG00000016784 | 893,438424 | 3,229015878    | 0,19216246 | 16,803573  | 2,30E-63  | 9,91E-61  | IL1RL2   |
| ENSGALG00000008581 | 13805,345  | 3,209755496    | 0,25216846 | 12,7286158 | 4,10E-37  | 9,50E-35  | DUSP5    |
| ENSGALG00000011099 | 516,017104 | 3,19842177     | 0,21907483 | 14,5996772 | 2,82E-48  | 8,82E-46  | FAP      |
| ENSGALG00000003456 | 170,923754 | 3,130034846    | 0,27207277 | 11,5044031 | 1,25E-30  | 1,98E-28  | CA12     |
| ENSGALG00000015358 | 2958,75231 | 3,121559149    | 0,12071098 | 25,8597779 | 1,89E-147 | 2,95E-144 | MYH15    |
| ENSGALG00000011940 | 461,321244 | 2,983749675    | 0,21913664 | 13,6159322 | 3,22E-42  | 8,06E-40  |          |
| ENSGALG00000007963 | 212,091292 | 2,963911322    | 0,25006993 | 11,8523298 | 2,09E-32  | 3,59E-30  | NFATC2   |
| ENSGALG00000023521 | 856,317445 | 2,942428455    | 0,19797705 | 14,8624723 | 5,78E-50  | 1,85E-47  | ADRA2A   |
| ENSGALG00000007171 | 114,627355 | 2,91119837     | 0,27426227 | 10,6146514 | 2,55E-26  | 3,32E-24  | CIITA    |
| ENSGALG00000005000 | 9346,89113 | 2,843605103    | 0,13435603 | 21,1646995 | 2,02E-99  | 2,11E-96  | COMTD1   |
| ENSGALG00000000600 | 182,137118 | 2,828234018    | 0,26246019 | 10,7758591 | 4,48E-27  | 6,15E-25  |          |
| ENSGALG00000012018 | 1787,86628 | 2,812280515    | 0,16831135 | 16,7087992 | 1,13E-62  | 4,72E-60  | UGT8     |
| ENSGALG00000000177 | 2934,9664  | 2,765911854    | 0,13662864 | 20,2440117 | 4,01E-91  | 3,35E-88  |          |
| ENSGALG00000007346 | 8739,08087 | 2,763402401    | 0,14295509 | 19,330563  | 2,97E-83  | 1,96E-80  | KIAA1462 |
| ENSGALG00000001621 | 341,359461 | 2,731716978    | 0,25022736 | 10,9169398 | 9,57E-28  | 1,38E-25  | CLDN5    |
| ENSGALG00000010224 | 190,389423 | 2,688243072    | 0,2692821  | 9,9829994  | 1,81E-23  | 2,06E-21  |          |
| ENSGALG00000009704 | 16406,1404 | 2,653508455    | 0,23537258 | 11,2736518 | 1,77E-29  | 2,70E-27  | CHST15   |
| ENSGALG00000005209 | 3731,94501 | 2,631256548    | 0,27714025 | 9,49431393 | 2,22E-21  | 2,10E-19  | AQP1     |
| ENSGALG00000014984 | 5578,94086 | 2,599579307    | 0,10540138 | 24,6636185 | 2,63E-134 | 3,29E-131 | F2RL1    |
| ENSGALG00000022962 | 95,9619859 | 2,592879602    | 0,27689482 | 9,3641318  | 7,67E-21  | 7,00E-19  |          |
| ENSGALG00000002183 | 379,587253 | 2,571301428    | 0,24362434 | 10,5543701 | 4,85E-26  | 6,25E-24  | PRR16    |
| ENSGALG00000015388 | 2544,04823 | 2,539489467    | 0,27173379 | 9,34550488 | 9,15E-21  | 8,29E-19  |          |
| ENSGALG00000016140 | 327,169323 | 2,527534269    | 0,2417696  | 10,4543098 | 1,40E-25  | 1,79E-23  | FAM3B    |
| ENSGALG00000013102 | 1492,03268 | 2,517151592    | 0,12944514 | 19,4457017 | 3,17E-84  | 2,20E-81  | COBL     |
| ENSGALG00000005855 | 4852,14054 | 2,515154305    | 0,15070039 | 16,6897667 | 1,56E-62  | 6,28E-60  |          |
| ENSGALG00000002816 | 1217,9424  | 2,498779812    | 0,17668612 | 14,1424792 | 2,08E-45  | 5,78E-43  | STK10    |
| ENSGALG00000026258 | 189,462612 | 2,487122645    | 0,26495328 | 9,3870233  | 6,17E-21  | 5,68E-19  | MAF      |
| ENSGALG00000003126 | 980,359046 | 2,475370264    | 0,15056385 | 16,440668  | 9,78E-61  | 3,82E-58  | ERBB4    |
| ENSGALG00000002540 | 1485,05869 | 2,44573463     | 0,13676571 | 17,8826589 | 1,61E-71  | 8,39E-69  |          |
| ENSGALG00000015826 | 238,755372 | 2,399148661    | 0,27605492 | 8,69083812 | 3,60E-18  | 2,53E-16  | HTR1E    |
| ENSGALG00000007538 | 97,0573797 | 2,386772965    | 0,27690143 | 8,61957623 | 6,72E-18  | 4,64E-16  |          |
| ENSGALG00000019054 | 408,32875  | 2,38528849     | 0,2379735  | 10,0233366 | 1,20E-23  | 1,38E-21  |          |
| ENSGALG00000026366 | 561,445489 | 2,348234721    | 0,23749642 | 9,88745309 | 4,72E-23  | 5,13E-21  |          |
| ENSGALG00000004306 | 1355,5371  | 2,335846949    | 0,15683954 | 14,893227  | 3,65E-50  | 1,20E-47  | SYT12    |
| ENSGALG00000009393 | 548,007386 | 2,335695464    | 0,18992639 | 12,2978985 | 9,30E-35  | 1,85E-32  |          |
| ENSGALG00000007657 | 4493,01812 | 2,332413704    | 0,26632361 | 8,75781796 | 1,99E-18  | 1,44E-16  | CDX4     |
| ENSGALG00000017091 | 755,513643 | 2,329587636    | 0,16022975 | 14,5390453 | 6,85E-48  | 2,09E-45  | FLT1     |
| ENSGALG00000011562 | 980,279996 | 2,318757284    | 0,17351326 | 13,3635736 | 9,87E-41  | 2,42E-38  | PARK2    |
| ENSGALG00000012051 | 782,419586 | 2,272220282    | 0,23077218 | 9,84616192 | 7,12E-23  | 7,61E-21  |          |

|                    |            |             |            |            |           |           |          |
|--------------------|------------|-------------|------------|------------|-----------|-----------|----------|
| ENSGALG00000011207 | 11039,4244 | 2,267210819 | 0,10235954 | 22,1494829 | 1,06E-108 | 1,20E-105 | DUSP6    |
| ENSGALG00000010036 | 233,218083 | 2,253052375 | 0,24656449 | 9,13778123 | 6,37E-20  | 5,35E-18  | FOSL2    |
| ENSGALG00000000949 | 209,314356 | 2,249487158 | 0,24647672 | 9,12657061 | 7,07E-20  | 5,90E-18  | HBEGF    |
| ENSGALG00000004376 | 1011,34575 | 2,243095428 | 0,17712966 | 12,6635789 | 9,41E-37  | 2,14E-34  | KCNJ2    |
| ENSGALG00000007543 | 311,281076 | 2,235076903 | 0,23707019 | 9,42791198 | 4,18E-21  | 3,91E-19  | APCDD1L  |
| ENSGALG00000014159 | 15753,2456 | 2,234266769 | 0,08275046 | 27,0000523 | 1,48E-160 | 3,08E-157 | PACSIN2  |
| ENSGALG00000016086 | 151,68942  | 2,227609215 | 0,26302517 | 8,46918638 | 2,47E-17  | 1,63E-15  | EGR4     |
| ENSGALG00000017244 | 1556,01813 | 2,226234853 | 0,13126312 | 16,9600944 | 1,62E-64  | 7,51E-62  | PRSS23   |
| ENSGALG00000007786 | 691,837015 | 2,190066734 | 0,24318575 | 9,00573619 | 2,14E-19  | 1,66E-17  | DOK5     |
| ENSGALG00000017242 | 1658,38116 | 2,189728881 | 0,12383488 | 17,6826506 | 5,70E-70  | 2,85E-67  | FZD4     |
| ENSGALG00000005061 | 3913,87544 | 2,1754071   | 0,11345305 | 19,1745135 | 6,04E-82  | 3,78E-79  | PPM1E    |
| ENSGALG00000005176 | 768,829888 | 2,156988496 | 0,17567574 | 12,2782377 | 1,19E-34  | 2,32E-32  |          |
| ENSGALG00000003437 | 391,254589 | 2,148196892 | 0,22078047 | 9,73001328 | 2,25E-22  | 2,28E-20  |          |
| ENSGALG00000027275 | 448,763372 | 2,082192136 | 0,23055734 | 9,03112478 | 1,70E-19  | 1,34E-17  |          |
| ENSGALG00000005499 | 41654,758  | 2,068323361 | 0,23020452 | 8,98472101 | 2,59E-19  | 1,99E-17  | IL17RD   |
| ENSGALG00000006995 | 146,518321 | 2,052973523 | 0,26905137 | 7,63041466 | 2,34E-14  | 1,21E-12  | APOD     |
| ENSGALG00000004594 | 723,032621 | 2,028493881 | 0,21261457 | 9,54070945 | 1,42E-21  | 1,37E-19  | CD74     |
| ENSGALG00000006112 | 965,473662 | 2,027013529 | 0,17450249 | 11,6159577 | 3,42E-31  | 5,48E-29  | SCN5A    |
| ENSGALG00000025941 | 463,056002 | 1,970690155 | 0,19459556 | 10,1271078 | 4,19E-24  | 4,99E-22  | RGS20    |
| ENSGALG00000012732 | 335,645133 | 1,970234077 | 0,21232377 | 9,2793854  | 1,70E-20  | 1,49E-18  | PHACTR1  |
| ENSGALG00000017179 | 331,83407  | 1,969058193 | 0,24335518 | 8,09129369 | 5,90E-16  | 3,53E-14  | PDGFD    |
| ENSGALG00000007940 | 119,525715 | 1,939184933 | 0,27051161 | 7,16858298 | 7,58E-13  | 3,26E-11  |          |
| ENSGALG00000011833 | 10182,5258 | 1,93191024  | 0,0952049  | 20,2921299 | 1,51E-91  | 1,35E-88  |          |
| ENSGALG00000003323 | 80,456143  | 1,918109692 | 0,2769549  | 6,92571127 | 4,34E-12  | 1,69E-10  | OSGIN1   |
| ENSGALG00000012635 | 985,437941 | 1,911001153 | 0,1578461  | 12,1067365 | 9,73E-34  | 1,79E-31  |          |
| ENSGALG00000022490 | 573,744074 | 1,907440028 | 0,20504083 | 9,30273285 | 1,37E-20  | 1,21E-18  |          |
| ENSGALG00000026154 | 1182,06867 | 1,903399885 | 0,15185043 | 12,534702  | 4,82E-36  | 1,02E-33  | CARD19   |
| ENSGALG00000008461 | 127,705778 | 1,900360149 | 0,2708458  | 7,0163913  | 2,28E-12  | 9,25E-11  |          |
| ENSGALG00000007415 | 201,020232 | 1,899486225 | 0,25905889 | 7,33225653 | 2,26E-13  | 1,04E-11  |          |
| ENSGALG00000000544 | 59,7220256 | 1,895252672 | 0,27550462 | 6,87920476 | 6,02E-12  | 2,30E-10  | RAB44    |
| ENSGALG00000016785 | 81,8603384 | 1,892879929 | 0,27682278 | 6,83787639 | 8,04E-12  | 3,02E-10  | IL1RL1   |
| ENSGALG00000006447 | 1443,0601  | 1,885131113 | 0,20851752 | 9,04063661 | 1,56E-19  | 1,24E-17  |          |
| ENSGALG00000005498 | 1010,21765 | 1,873960213 | 0,20189609 | 9,28180559 | 1,67E-20  | 1,47E-18  |          |
| ENSGALG00000008353 | 2472,76845 | 1,848707427 | 0,15762664 | 11,7283947 | 9,12E-32  | 1,50E-29  |          |
| ENSGALG00000010005 | 472,644462 | 1,841664237 | 0,22183955 | 8,30178484 | 1,03E-16  | 6,45E-15  | EPAS1    |
| ENSGALG00000010597 | 1857,71605 | 1,8345583   | 0,17099128 | 10,728958  | 7,44E-27  | 1,01E-24  |          |
| ENSGALG00000012106 | 297,149921 | 1,828065766 | 0,26618963 | 6,86753188 | 6,53E-12  | 2,48E-10  | SCTR     |
| ENSGALG00000000141 | 377,173549 | 1,818659764 | 0,24878968 | 7,31002901 | 2,67E-13  | 1,21E-11  | BLB1     |
| ENSGALG00000026262 | 4692,72087 | 1,788029436 | 0,15007014 | 11,9146249 | 9,93E-33  | 1,73E-30  |          |
| ENSGALG00000010468 | 963,638886 | 1,7857319   | 0,19155321 | 9,32238057 | 1,14E-20  | 1,02E-18  | ISM2     |
| ENSGALG00000027365 | 919,719868 | 1,784528584 | 0,14750129 | 12,0983934 | 1,08E-33  | 1,95E-31  | HIVEP3   |
| ENSGALG00000003706 | 2459,1448  | 1,784490953 | 0,12794473 | 13,9473579 | 3,26E-44  | 8,69E-42  |          |
| ENSGALG00000011581 | 7771,72761 | 1,763989645 | 0,27657569 | 6,37796348 | 1,79E-10  | 5,80E-09  | KIF26A   |
| ENSGALG00000023241 | 912,035255 | 1,749836088 | 0,17358051 | 10,080833  | 6,72E-24  | 7,85E-22  |          |
| ENSGALG00000027521 | 220,81723  | 1,741041239 | 0,24159087 | 7,20656876 | 5,74E-13  | 2,50E-11  |          |
| ENSGALG00000012623 | 98,1782216 | 1,738546704 | 0,2738672  | 6,3481377  | 2,18E-10  | 6,97E-09  |          |
| ENSGALG00000029175 | 11184,2893 | 1,731471147 | 0,15062573 | 11,4951888 | 1,39E-30  | 2,18E-28  | EFNB2    |
| ENSGALG00000027331 | 92,8137096 | 1,731139271 | 0,27587874 | 6,27500053 | 3,50E-10  | 1,10E-08  |          |
| ENSGALG00000001560 | 177,821121 | 1,726930021 | 0,27637082 | 6,24859752 | 4,14E-10  | 1,27E-08  |          |
| ENSGALG00000002203 | 108,392731 | 1,726038051 | 0,27079159 | 6,37404609 | 1,84E-10  | 5,92E-09  | FGF-18   |
| ENSGALG00000024083 | 1953,45291 | 1,719739442 | 0,15521106 | 11,0800061 | 1,57E-28  | 2,31E-26  | C8orf4   |
| ENSGALG00000005069 | 457,203952 | 1,702946767 | 0,18881513 | 9,01912232 | 1,90E-19  | 1,48E-17  |          |
| ENSGALG00000005689 | 438,331804 | 1,702270541 | 0,18963661 | 8,97648701 | 2,80E-19  | 2,13E-17  | Pax-2    |
| ENSGALG00000009693 | 145,589702 | 1,692012083 | 0,26448256 | 6,39744289 | 1,58E-10  | 5,13E-09  | CPXM2    |
| ENSGALG00000015332 | 921,622061 | 1,689640626 | 0,27053693 | 6,2455083  | 4,22E-10  | 1,29E-08  | CPLX1    |
| ENSGALG00000006084 | 123,749559 | 1,684603389 | 0,27421003 | 6,14347832 | 8,07E-10  | 2,35E-08  |          |
| ENSGALG00000028250 | 102,045127 | 1,684255106 | 0,27227076 | 6,18595672 | 6,17E-10  | 1,83E-08  | ANKRD22  |
| ENSGALG00000010258 | 947,034185 | 1,674285408 | 0,222721   | 7,5174116  | 5,59E-14  | 2,75E-12  | LTBP2    |
| ENSGALG00000003488 | 483,411427 | 1,668824259 | 0,21466802 | 7,77397695 | 7,61E-15  | 4,14E-13  |          |
| ENSGALG00000008281 | 275,533181 | 1,659542176 | 0,23132804 | 7,1739776  | 7,28E-13  | 3,14E-11  | NEURL1   |
| ENSGALG00000005263 | 1264,63713 | 1,654921404 | 0,1861074  | 8,89229227 | 5,99E-19  | 4,46E-17  | SOX8     |
| ENSGALG00000016500 | 476,307952 | 1,652658269 | 0,1912173  | 8,64282823 | 5,48E-18  | 3,81E-16  | FKBP12.6 |

|                    |            |             |            |            |          |          |          |
|--------------------|------------|-------------|------------|------------|----------|----------|----------|
| ENSGALG00000013033 | 98,9033207 | 1,649436663 | 0,27685165 | 5,95783573 | 2,56E-09 | 6,80E-08 |          |
| ENSGALG00000009740 | 628,788388 | 1,648366239 | 0,18242751 | 9,03573286 | 1,63E-19 | 1,29E-17 | RASGRP1  |
| ENSGALG00000011076 | 175,435833 | 1,644995721 | 0,24871447 | 6,61399281 | 3,74E-11 | 1,29E-09 | SYNE3    |
| ENSGALG00000010910 | 2761,33893 | 1,643397512 | 0,13038008 | 12,6046669 | 1,99E-36 | 4,45E-34 |          |
| ENSGALG00000001188 | 5705,77087 | 1,635057494 | 0,1139957  | 14,3431509 | 1,18E-46 | 3,42E-44 |          |
| ENSGALG00000016602 | 1430,32585 | 1,632391617 | 0,15056739 | 10,8416017 | 2,19E-27 | 3,04E-25 |          |
| ENSGALG00000026989 | 11486,0599 | 1,621656649 | 0,10265821 | 15,7966585 | 3,28E-56 | 1,21E-53 | HOXA7    |
| ENSGALG00000016377 | 35584,2442 | 1,612690665 | 0,24226856 | 6,65662393 | 2,80E-11 | 9,79E-10 | PXDN     |
| ENSGALG00000027218 | 62,1190209 | 1,609222298 | 0,27648022 | 5,82038856 | 5,87E-09 | 1,49E-07 |          |
| ENSGALG00000011058 | 222,479144 | 1,607120374 | 0,23535625 | 6,82845848 | 8,58E-12 | 3,20E-10 | LEPR     |
| ENSGALG00000008118 | 2195,31441 | 1,603231134 | 0,14691442 | 10,9126874 | 1,00E-27 | 1,43E-25 |          |
| ENSGALG00000009282 | 4772,45996 | 1,600131022 | 0,1549655  | 10,3257244 | 5,39E-25 | 6,61E-23 | ELMSAN1  |
| ENSGALG00000027707 | 84,429158  | 1,597314136 | 0,27648459 | 5,77722663 | 7,59E-09 | 1,89E-07 | ESM1     |
| ENSGALG00000028281 | 147,102379 | 1,585304805 | 0,26452499 | 5,99302471 | 2,06E-09 | 5,54E-08 |          |
| ENSGALG00000005347 | 2499,3111  | 1,58404156  | 0,16400145 | 9,65870473 | 4,52E-22 | 4,56E-20 | ADAMTS18 |
| ENSGALG00000001383 | 75,1252537 | 1,582310757 | 0,27707894 | 5,71068578 | 1,13E-08 | 2,76E-07 | HTR4     |
| ENSGALG00000026484 | 105,284801 | 1,578601549 | 0,27180452 | 5,80785612 | 6,33E-09 | 1,60E-07 |          |
| ENSGALG00000008890 | 110,363216 | 1,553993643 | 0,27546286 | 5,64139075 | 1,69E-08 | 4,04E-07 | ADGRL4   |
| ENSGALG00000017714 | 531,051528 | 1,553191397 | 0,22067465 | 7,038377   | 1,94E-12 | 8,03E-11 |          |
| ENSGALG00000011608 | 1442,66872 | 1,548805995 | 0,27671663 | 5,59708325 | 2,18E-08 | 5,17E-07 | INF2     |
| ENSGALG00000011148 | 2343,39868 | 1,54566024  | 0,12322461 | 12,5434379 | 4,32E-36 | 9,31E-34 |          |
| ENSGALG00000004730 | 427,286464 | 1,54214284  | 0,20259329 | 7,61201356 | 2,70E-14 | 1,38E-12 |          |
| ENSGALG00000011962 | 5021,1701  | 1,540068054 | 0,12375377 | 12,4446156 | 1,50E-35 | 3,12E-33 |          |
| ENSGALG00000008875 | 1473,68406 | 1,539400497 | 0,15531993 | 9,91115904 | 3,72E-23 | 4,09E-21 | PLCB1    |
| ENSGALG00000001189 | 175,140381 | 1,519846307 | 0,24672052 | 6,1601942  | 7,27E-10 | 2,13E-08 | NCF1     |
| ENSGALG00000012847 | 213,214453 | 1,514705906 | 0,24982981 | 6,06295113 | 1,34E-09 | 3,74E-08 |          |
| ENSGALG00000016754 | 1417,60122 | 1,508945346 | 0,15769298 | 9,56888107 | 1,08E-21 | 1,06E-19 |          |
| ENSGALG00000006997 | 697,291921 | 1,507910301 | 0,16647993 | 9,05761005 | 1,33E-19 | 1,08E-17 | BRINP1   |
| ENSGALG00000019426 | 134,849102 | 1,491625247 | 0,25823534 | 5,77622423 | 7,64E-09 | 1,90E-07 |          |
| ENSGALG00000016348 | 4059,56984 | 1,488129704 | 0,14344251 | 10,3743978 | 3,24E-25 | 4,06E-23 | SAT1     |
| ENSGALG00000011236 | 148,702178 | 1,484958654 | 0,273941   | 5,42072431 | 5,94E-08 | 1,31E-06 | BEGAIN   |
| ENSGALG00000002594 | 917,561594 | 1,484249601 | 0,27345121 | 5,42784068 | 5,70E-08 | 1,27E-06 | TFPI     |
| ENSGALG00000023751 | 646,755681 | 1,484039491 | 0,2418537  | 6,13610416 | 8,46E-10 | 2,45E-08 |          |
| ENSGALG00000014930 | 4123,64273 | 1,479606742 | 0,09900477 | 14,9448018 | 1,68E-50 | 5,69E-48 | ENC1     |
| ENSGALG00000010683 | 477,522338 | 1,466981653 | 0,20015393 | 7,32926728 | 2,31E-13 | 1,06E-11 |          |
| ENSGALG00000026795 | 85,4265267 | 1,459031178 | 0,27670179 | 5,27293727 | 1,34E-07 | 2,78E-06 |          |
| ENSGALG00000007660 | 3126,72301 | 1,456310727 | 0,1563383  | 9,31512467 | 1,22E-20 | 1,09E-18 |          |
| ENSGALG00000026251 | 159,900115 | 1,452153197 | 0,27592059 | 5,26293896 | 1,42E-07 | 2,93E-06 |          |
| ENSGALG00000028130 | 618,2391   | 1,44989129  | 0,1712474  | 8,46664711 | 2,53E-17 | 1,65E-15 |          |
| ENSGALG00000015865 | 3211,05522 | 1,445378264 | 0,11980727 | 12,0641947 | 1,63E-33 | 2,92E-31 |          |
| ENSGALG00000009667 | 556,468113 | 1,442248321 | 0,24008414 | 6,00726204 | 1,89E-09 | 5,13E-08 | MFAP3L   |
| ENSGALG00000005442 | 233,433914 | 1,437319869 | 0,25444764 | 5,64878444 | 1,62E-08 | 3,89E-07 | PALMD    |
| ENSGALG00000007771 | 2433,98465 | 1,43708626  | 0,1405035  | 10,2281172 | 1,48E-24 | 1,78E-22 | FAM210B  |
| ENSGALG00000026790 | 326,80396  | 1,433302155 | 0,24589155 | 5,82900134 | 5,58E-09 | 1,42E-07 | DMRT2    |
| ENSGALG00000007530 | 576,29845  | 1,423961501 | 0,20873713 | 6,82179313 | 8,99E-12 | 3,33E-10 |          |
| ENSGALG00000027210 | 241,661292 | 1,422887936 | 0,22890179 | 6,2161502  | 5,10E-10 | 1,54E-08 |          |
| ENSGALG00000008914 | 65,3744448 | 1,411144988 | 0,27696481 | 5,09503356 | 3,49E-07 | 6,83E-06 | NRAP     |
| ENSGALG00000007218 | 5981,23565 | 1,41095016  | 0,1549608  | 9,10520721 | 8,61E-20 | 7,09E-18 | MB21D2   |
| ENSGALG00000012702 | 12990,3378 | 1,407925441 | 0,12617763 | 11,1582809 | 6,52E-29 | 9,72E-27 | JARID2   |
| ENSGALG00000009546 | 1312,83637 | 1,402581457 | 0,15185477 | 9,23633455 | 2,55E-20 | 2,20E-18 |          |
| ENSGALG00000006314 | 830,004543 | 1,402020858 | 0,15483246 | 9,05508371 | 1,36E-19 | 1,09E-17 |          |
| ENSGALG00000020719 | 239,712039 | 1,399243921 | 0,25114775 | 5,57139732 | 2,53E-08 | 5,93E-07 |          |
| ENSGALG00000011468 | 1596,02721 | 1,39801296  | 0,18393319 | 7,60065615 | 2,95E-14 | 1,49E-12 | IGFBP5   |
| ENSGALG00000015665 | 918,715368 | 1,394518864 | 0,15230743 | 9,15594797 | 5,39E-20 | 4,55E-18 | SH3BP2   |
| ENSGALG00000011680 | 2741,59968 | 1,389021273 | 0,17555553 | 7,91214743 | 2,53E-15 | 1,43E-13 | EPHA5    |
| ENSGALG00000010470 | 502,578729 | 1,388958129 | 0,18969021 | 7,32224451 | 2,44E-13 | 1,11E-11 | TCERG1L  |
| ENSGALG00000011419 | 2270,32976 | 1,382981881 | 0,11393773 | 12,1380504 | 6,64E-34 | 1,26E-31 | DUSP4    |
| ENSGALG00000014852 | 13662,8714 | 1,380781721 | 0,0883531  | 15,6279945 | 4,69E-55 | 1,68E-52 |          |
| ENSGALG00000010049 | 550,482195 | 1,375590195 | 0,23963948 | 5,74024862 | 9,45E-09 | 2,33E-07 | PTPRB    |
| ENSGALG00000006401 | 3753,95769 | 1,372021166 | 0,13289053 | 10,3244463 | 5,46E-25 | 6,64E-23 | OSBPL5   |
| ENSGALG00000002326 | 668,309268 | 1,369220123 | 0,17190144 | 7,96514611 | 1,65E-15 | 9,51E-14 |          |
| ENSGALG00000007846 | 625,227196 | 1,3613354   | 0,26060484 | 5,22375324 | 1,75E-07 | 3,55E-06 |          |

|                     |            |             |            |            |          |            |          |
|---------------------|------------|-------------|------------|------------|----------|------------|----------|
| ENSGALG00000011120  | 395,765388 | 1,356774191 | 0,22365321 | 6,06641944 | 1,31E-09 | 3,68E-08   |          |
| ENSGALG00000004209  | 184,595238 | 1,355480435 | 0,24429813 | 5,54846835 | 2,88E-08 | 6,70E-07   | ELFN1    |
| ENSGALG000000014516 | 1387,85858 | 1,351178171 | 0,18357479 | 7,36036878 | 1,83E-13 | 8,47E-12   | CPEB2    |
| ENSGALG000000004569 | 1782,95199 | 1,348974691 | 0,16732365 | 8,06206833 | 7,50E-16 | 4,45E-14   | UNC5B    |
| ENSGALG000000012911 | 336,285764 | 1,345449733 | 0,24276482 | 5,54219392 | 2,99E-08 | 6,93E-07   | SYT10    |
| ENSGALG000000015028 | 333,710492 | 1,342064123 | 0,2166346  | 6,19505895 | 5,83E-10 | 1,74E-08   |          |
| ENSGALG000000005476 | 194,019797 | 1,338834069 | 0,27604471 | 4,85006238 | 1,23E-06 | 2,21E-05   | PTH1R    |
| ENSGALG000000000107 | 64,6686363 | 1,334266505 | 0,27712884 | 4,81460712 | 1,47E-06 | 2,60E-05   | TRIM7    |
| ENSGALG000000006258 | 7855,034   | 1,330333906 | 0,11339109 | 11,7322618 | 8,71E-32 | 1,45E-29   | SPOCK1   |
| ENSGALG000000015089 | 1227,41331 | 1,327665029 | 0,20978484 | 6,32869871 | 2,47E-10 | 7,85E-09   | GAP43    |
| ENSGALG000000027764 | 201,777427 | 1,324450715 | 0,26757908 | 4,94975438 | 7,43E-07 | 1,38E-05   |          |
| ENSGALG000000011110 | 269,499781 | 1,322132253 | 0,23248021 | 5,6870744  | 1,29E-08 | 3,16E-07   |          |
| ENSGALG000000008893 | 314,010022 | 1,318238187 | 0,24175367 | 5,45281554 | 4,96E-08 | 1,12E-06   |          |
| ENSGALG000000011220 | 1013,85256 | 1,316265785 | 0,15106079 | 8,7134842  | 2,95E-18 | 2,11E-16   | SLC25A29 |
| ENSGALG000000005805 | 3857,09426 | 1,313014625 | 0,12265981 | 10,7045222 | 9,69E-27 | 1,29E-24   | PLCD1    |
| ENSGALG000000022909 | 468,481699 | 1,309497831 | 0,23797027 | 5,50277912 | 3,74E-08 | 8,55E-07   | PTPN3    |
| ENSGALG000000007140 | 2510,20659 | 1,309470163 | 0,26722383 | 4,90027474 | 9,57E-07 | 1,75E-05   | NRP1     |
| ENSGALG000000023347 | 339,64918  | 1,299000587 | 0,20361197 | 6,37978494 | 1,77E-10 | 5,75E-09   | PTCHD3   |
| ENSGALG000000010311 | 349,190305 | 1,29508602  | 0,2066853  | 6,26598025 | 3,70E-10 | 1,15E-08   | NAV3     |
| ENSGALG000000004118 | 1210,82766 | 1,294260658 | 0,15836962 | 8,17240512 | 3,02E-16 | 1,85E-14   |          |
| ENSGALG000000002993 | 1805,52188 | 1,293663972 | 0,14239974 | 9,0847354  | 1,04E-19 | 8,44E-18   | CA10     |
| ENSGALG000000009808 | 160,258227 | 1,293465516 | 0,26116788 | 4,952621   | 7,32E-07 | 1,36E-05   |          |
| ENSGALG000000015256 | 9263,94872 | 1,284509548 | 0,10864322 | 11,8231908 | 2,96E-32 | 5,01E-30   | PAM      |
| ENSGALG000000006729 | 4860,44055 | 1,281458961 | 0,27186573 | 4,713573   | 2,43E-06 | 4,09E-05   |          |
| ENSGALG000000015908 | 893,550112 | 1,276423655 | 0,19668679 | 6,48962586 | 8,60E-11 | 2,85E-09   | COL12A1  |
| ENSGALG000000014727 | 724,352277 | 1,275557809 | 0,20623272 | 6,18504092 | 6,21E-10 | 1,84E-08   | PDE4D    |
| ENSGALG000000008263 | 465,678921 | 1,273175208 | 0,20291488 | 6,27443008 | 3,51E-10 | 1,10E-08   | CNTN4    |
| ENSGALG000000016817 | 5327,13148 | 1,2720896   | 0,0882221  | 14,4191717 | 3,92E-47 | 1,17E-44   | RASA3    |
| ENSGALG000000007253 | 507,277126 | 1,27114813  | 0,17906175 | 7,09893728 | 1,26E-12 | 5,28E-11   | IL1RAP   |
| ENSGALG000000009920 | 1787,73878 | 1,271106358 | 0,20301633 | 6,26110393 | 3,82E-10 | 1,18E-08   | COCH     |
| ENSGALG000000002632 | 1174,8881  | 1,269452785 | 0,16354378 | 7,76215854 | 8,35E-15 | 4,52E-13   | CALCRL   |
| ENSGALG000000016102 | 216,026386 | 1,263113327 | 0,27712691 | 4,55788769 | 5,17E-06 | 8,21E-05   |          |
| ENSGALG000000001608 | 486,701914 | 1,262511696 | 0,21788918 | 5,79428346 | 6,86E-09 | 1,72E-07   | UNC5D    |
| ENSGALG000000016998 | 394,580006 | 1,256730923 | 0,21467796 | 5,85402864 | 4,80E-09 | 1,23E-07   | LPAR6    |
| ENSGALG000000013503 | 631,301741 | 1,248703074 | 0,19424591 | 6,42846519 | 1,29E-10 | 4,21E-09   | FAM149A  |
| ENSGALG000000011831 | 6588,41321 | 1,24831638  | 0,0954127  | 13,0833358 | 4,10E-39 | 9,86E-37   | ANKRD50  |
| ENSGALG000000000054 | 9908,86346 | 1,246870327 | 0,12340391 | 10,1039772 | 5,30E-24 | 6,26E-22   |          |
| ENSGALG000000028047 | 547,475566 | 1,243898501 | 0,24576817 | 5,06126779 | 4,16E-07 | 8,03E-06   | RHOV     |
| ENSGALG000000010010 | 1045,78332 | 1,237630354 | 0,14486806 | 8,54315544 | 1,31E-17 | 8,74E-16   | RHOQ     |
| ENSGALG000000009947 | 4438,8697  | 1,236965236 | 0,09832671 | 12,5801542 | 2,71E-36 | 5,96E-34   | PLEKHH2  |
| ENSGALG000000014983 | 1347,23546 | 1,23637443  | 0,14656523 | 8,43565994 | 3,29E-17 | 2,12E-15   | F2R      |
| ENSGALG000000005619 | 769,181048 | 1,235271948 | 0,20759912 | 5,95027545 | 2,68E-09 | 7,08E-08   |          |
| ENSGALG000000015653 | 570,869024 | 1,234972794 | 0,196909   | 6,27179447 | 3,57E-10 | 1,11E-08   |          |
| ENSGALG000000003114 | 396,293229 | 1,234804889 | 0,20823968 | 5,92972908 | 3,03E-09 | 7,97E-08   | NOG      |
| ENSGALG000000019716 | 79,9556086 | 1,234170903 | 0,27584604 | 4,47412944 | 7,67E-06 | 0,00011733 | KRT20    |
| ENSGALG000000019261 | 997,670343 | 1,230099163 | 0,20297117 | 6,06046252 | 1,36E-09 | 3,79E-08   |          |
| ENSGALG000000028821 | 10673,5529 | 1,225133338 | 0,13787775 | 8,88564911 | 6,35E-19 | 4,70E-17   | GLIPR2   |
| ENSGALG000000013902 | 978,003089 | 1,221242084 | 0,22061929 | 5,53551816 | 3,10E-08 | 7,19E-07   |          |
| ENSGALG000000008999 | 1657,80989 | 1,220108565 | 0,15349781 | 7,94870323 | 1,88E-15 | 1,07E-13   | AFAP1L2  |
| ENSGALG000000014823 | 35,5546103 | 1,217853522 | 0,25543674 | 4,76773037 | 1,86E-06 | 3,21E-05   |          |
| ENSGALG000000000307 | 7560,3549  | 1,215832976 | 0,11045819 | 11,0071785 | 3,53E-28 | 5,13E-26   |          |
| ENSGALG000000007268 | 3351,96385 | 1,214609385 | 0,1221963  | 9,93982107 | 2,79E-23 | 3,09E-21   |          |
| ENSGALG000000000721 | 3131,94473 | 1,214440274 | 0,12625936 | 9,61861552 | 6,67E-22 | 6,57E-20   | SLC41A1  |
| ENSGALG000000011061 | 859,770333 | 1,212027759 | 0,15686437 | 7,72659688 | 1,10E-14 | 5,93E-13   |          |
| ENSGALG000000007669 | 6031,34854 | 1,205315602 | 0,27706455 | 4,35030608 | 1,36E-05 | 0,00019547 | EGR1     |
| ENSGALG000000026557 | 144,536518 | 1,203253046 | 0,27652705 | 4,35130324 | 1,35E-05 | 0,00019503 | PGF      |
| ENSGALG000000002555 | 1133,81707 | 1,202502668 | 0,20625382 | 5,83020812 | 5,54E-09 | 1,41E-07   | RET      |
| ENSGALG000000027133 | 142,021318 | 1,199491369 | 0,27660527 | 4,33647334 | 1,45E-05 | 0,00020682 |          |
| ENSGALG000000024035 | 1486,34939 | 1,198706359 | 0,15977826 | 7,50231181 | 6,27E-14 | 3,08E-12   |          |
| ENSGALG000000027070 | 3188,10078 | 1,19854946  | 0,13384164 | 8,95498217 | 3,40E-19 | 2,58E-17   | TIMP2    |
| ENSGALG000000001160 | 934,02292  | 1,198076321 | 0,1603006  | 7,47393516 | 7,78E-14 | 3,73E-12   |          |
| ENSGALG000000009360 | 505,831372 | 1,196193521 | 0,18849047 | 6,34617507 | 2,21E-10 | 7,04E-09   | CAPN2    |

|                    |            |             |            |            |          |            |            |
|--------------------|------------|-------------|------------|------------|----------|------------|------------|
| ENSGALG00000014080 | 86,7875432 | 1,191385609 | 0,27640604 | 4,31027336 | 1,63E-05 | 0,00022917 |            |
| ENSGALG00000028785 | 165,798859 | 1,191015745 | 0,26472615 | 4,49904838 | 6,83E-06 | 0,0001062  |            |
| ENSGALG00000014864 | 693,502451 | 1,190480858 | 0,15988047 | 7,44606817 | 9,62E-14 | 4,59E-12   |            |
| ENSGALG00000012927 | 251,354318 | 1,187339616 | 0,23405659 | 5,07287416 | 3,92E-07 | 7,58E-06   |            |
| ENSGALG00000007809 | 1064,24338 | 1,186972522 | 0,17157276 | 6,91818756 | 4,57E-12 | 1,77E-10   | TSHZ2      |
| ENSGALG00000016455 | 38193,5361 | 1,186649639 | 0,12872943 | 9,2181693  | 3,02E-20 | 2,59E-18   | GREB1      |
| ENSGALG00000013149 | 115,338492 | 1,183860135 | 0,26574609 | 4,45485435 | 8,40E-06 | 0,00012698 | MOCOS      |
| ENSGALG00000012407 | 252,485775 | 1,181422763 | 0,24199801 | 4,8819524  | 1,05E-06 | 1,90E-05   | LRP1B      |
| ENSGALG00000004365 | 588,746185 | 1,179727636 | 0,2121902  | 5,55976489 | 2,70E-08 | 6,32E-07   | WDR66      |
| ENSGALG00000011867 | 1901,86124 | 1,179474298 | 0,13477658 | 8,75132991 | 2,11E-18 | 1,52E-16   | SERHL2     |
| ENSGALG00000008369 | 1041,31301 | 1,177660239 | 0,16764215 | 7,02484557 | 2,14E-12 | 8,79E-11   | ABCC5      |
| ENSGALG00000002294 | 2609,13169 | 1,174006641 | 0,10962142 | 10,7096464 | 9,17E-27 | 1,23E-24   | SEMA6A     |
| ENSGALG00000002543 | 4971,15753 | 1,169335598 | 0,11955874 | 9,78042788 | 1,37E-22 | 1,43E-20   | CSGALNACT2 |
| ENSGALG00000007608 | 2014,25657 | 1,169181539 | 0,16816744 | 6,95248465 | 3,59E-12 | 1,41E-10   | ARHGEF9    |
| ENSGALG00000013892 | 1213,76955 | 1,167370699 | 0,13409168 | 8,70576514 | 3,15E-18 | 2,24E-16   | MAP3K5     |
| ENSGALG00000011439 | 1116,38335 | 1,165074777 | 0,15459091 | 7,53650268 | 4,83E-14 | 2,41E-12   |            |
| ENSGALG00000009450 | 2113,57054 | 1,162765074 | 0,12246309 | 9,49482074 | 2,21E-21 | 2,10E-19   | DUSP10     |
| ENSGALG00000010778 | 367,923952 | 1,156146033 | 0,2139715  | 5,4032712  | 6,54E-08 | 1,43E-06   | CHRM3      |
| ENSGALG00000023768 | 2459,33149 | 1,155472868 | 0,1314993  | 8,78691237 | 1,54E-18 | 1,12E-16   |            |
| ENSGALG00000004083 | 1247,88665 | 1,153422459 | 0,18198777 | 6,33791205 | 2,33E-10 | 7,41E-09   | GRIA1      |
| ENSGALG00000016927 | 964,07015  | 1,145535192 | 0,18286396 | 6,26441204 | 3,74E-10 | 1,16E-08   |            |
| ENSGALG00000016258 | 101,512923 | 1,141614114 | 0,26933385 | 4,23865814 | 2,25E-05 | 0,0003031  |            |
| ENSGALG00000006988 | 211,344493 | 1,141001037 | 0,25510377 | 4,47269383 | 7,72E-06 | 0,00011783 |            |
| ENSGALG00000027554 | 57,7750225 | 1,140917568 | 0,26979126 | 4,22889002 | 2,35E-05 | 0,00031419 |            |
| ENSGALG00000010166 | 921,824931 | 1,138308624 | 0,1575227  | 7,22631474 | 4,96E-13 | 2,20E-11   | VLDLR      |
| ENSGALG00000022887 | 1108,58418 | 1,136537812 | 0,22465067 | 5,05913389 | 4,21E-07 | 8,11E-06   | KBTBD11    |
| ENSGALG00000009556 | 1809,38722 | 1,135549159 | 0,19219403 | 5,90834769 | 3,46E-09 | 9,02E-08   | PRICKLE1   |
| ENSGALG00000029090 | 11253,5016 | 1,13552965  | 0,10420101 | 10,8974918 | 1,18E-27 | 1,67E-25   |            |
| ENSGALG00000012998 | 2212,17969 | 1,132683468 | 0,17363381 | 6,52340397 | 6,87E-11 | 2,28E-09   | WNT5B      |
| ENSGALG00000015355 | 7944,79086 | 1,129448636 | 0,09943877 | 11,3582319 | 6,75E-30 | 1,04E-27   | CD47       |
| ENSGALG00000028046 | 6226,49016 | 1,129369719 | 0,09319237 | 12,1186929 | 8,41E-34 | 1,57E-31   | INSIG2     |
| ENSGALG00000011690 | 44,529172  | 1,125300184 | 0,27344667 | 4,11524556 | 3,87E-05 | 0,00049258 |            |
| ENSGALG00000014866 | 49930,561  | 1,123162841 | 0,1127082  | 9,96522725 | 2,16E-23 | 2,44E-21   |            |
| ENSGALG00000004974 | 170,654697 | 1,122849026 | 0,25433468 | 4,41484832 | 1,01E-05 | 0,00014999 | PPARG      |
| ENSGALG00000009567 | 4756,82772 | 1,119009905 | 0,16006243 | 6,99108393 | 2,73E-12 | 1,09E-10   | TLL1       |
| ENSGALG00000027255 | 39,1566631 | 1,118838646 | 0,26596115 | 4,20677466 | 2,59E-05 | 0,00034362 | NRXN3      |
| ENSGALG00000026970 | 924,805259 | 1,11847741  | 0,16590864 | 6,74152603 | 1,57E-11 | 5,65E-10   |            |
| ENSGALG00000027778 | 219,349797 | 1,117057663 | 0,24992741 | 4,46952849 | 7,84E-06 | 0,0001193  |            |
| ENSGALG00000006376 | 88,1016959 | 1,116147137 | 0,27664315 | 4,03460964 | 5,47E-05 | 0,00067008 | TMC3       |
| ENSGALG00000008469 | 3420,38421 | 1,115125474 | 0,13665113 | 8,16038231 | 3,34E-16 | 2,03E-14   | SPINT1     |
| ENSGALG00000014687 | 236,291624 | 1,113638024 | 0,23763257 | 4,68638633 | 2,78E-06 | 4,61E-05   | EPHA1      |
| ENSGALG00000017044 | 264,610201 | 1,113521859 | 0,21886213 | 5,08777759 | 3,62E-07 | 7,06E-06   | TRPC4      |
| ENSGALG00000010692 | 6211,67753 | 1,111701613 | 0,10700281 | 10,3894623 | 2,77E-25 | 3,50E-23   | LRP8       |
| ENSGALG00000016470 | 648,950225 | 1,110403246 | 0,25736453 | 4,3145154  | 1,60E-05 | 0,00022558 | KCNS3      |
| ENSGALG00000010081 | 1999,17595 | 1,110146926 | 0,15885433 | 6,98845877 | 2,78E-12 | 1,11E-10   | SH3D19     |
| ENSGALG00000006337 | 29,3646416 | 1,109144959 | 0,25231504 | 4,39587332 | 1,10E-05 | 0,00016236 |            |
| ENSGALG00000026763 | 669,49741  | 1,104647316 | 0,1839101  | 6,00645275 | 1,90E-09 | 5,15E-08   |            |
| ENSGALG00000008182 | 270,211279 | 1,102402002 | 0,23087313 | 4,77492558 | 1,80E-06 | 3,11E-05   | CHAC2      |
| ENSGALG00000009170 | 1968,00063 | 1,101783321 | 0,11424532 | 9,64401251 | 5,21E-22 | 5,21E-20   | NCEH1      |
| ENSGALG00000006797 | 779,712052 | 1,10056236  | 0,16329659 | 6,73965302 | 1,59E-11 | 5,71E-10   | ADARB2     |
| ENSGALG00000015980 | 339,410662 | 1,100313329 | 0,24202176 | 4,54634055 | 5,46E-06 | 8,63E-05   |            |
| ENSGALG00000012439 | 1157,51774 | 1,098736639 | 0,22006508 | 4,99278059 | 5,95E-07 | 1,12E-05   |            |
| ENSGALG00000026518 | 640,345593 | 1,097099741 | 0,17683365 | 6,20413453 | 5,50E-10 | 1,65E-08   | RUNDC3A    |
| ENSGALG00000010268 | 256,63927  | 1,095957762 | 0,25692897 | 4,265606   | 1,99E-05 | 0,00027314 |            |
| ENSGALG00000028582 | 726,208031 | 1,093959706 | 0,15924578 | 6,86963091 | 6,44E-12 | 2,45E-10   |            |
| ENSGALG00000026379 | 373,049265 | 1,093396741 | 0,20587222 | 5,31104558 | 1,09E-07 | 2,29E-06   |            |
| ENSGALG00000002714 | 19270,5199 | 1,089564948 | 0,1023794  | 10,6424241 | 1,89E-26 | 2,49E-24   | TMEM132C   |
| ENSGALG00000016875 | 1713,92149 | 1,086190922 | 0,14132808 | 7,685599   | 1,52E-14 | 8,00E-13   |            |
| ENSGALG00000001434 | 188,612497 | 1,08597113  | 0,2527644  | 4,29637688 | 1,74E-05 | 0,00024177 | STOM       |
| ENSGALG00000005691 | 64,1916299 | 1,085096229 | 0,27707745 | 3,91621988 | 8,99E-05 | 0,00105057 |            |
| ENSGALG00000005492 | 5397,76531 | 1,08468259  | 0,14476582 | 7,49267029 | 6,75E-14 | 3,28E-12   |            |
| ENSGALG00000007113 | 2485,94591 | 1,078758406 | 0,26642197 | 4,04905949 | 5,14E-05 | 0,00063816 |            |

|                    |            |             |            |            |            |            |         |
|--------------------|------------|-------------|------------|------------|------------|------------|---------|
| ENSGALG00000006822 | 6257,91272 | 1,077915026 | 0,25174121 | 4,28183776 | 1,85E-05   | 0,00025592 | PCDH19  |
| ENSGALG00000013060 | 290,382045 | 1,076232694 | 0,23892972 | 4,50439019 | 6,66E-06   | 0,00010395 | ADCY2   |
| ENSGALG00000023581 | 182,271241 | 1,073595233 | 0,25670804 | 4,18216447 | 2,89E-05   | 0,0003802  |         |
| ENSGALG00000006705 | 1115,46368 | 1,073202663 | 0,18895057 | 5,67980637 | 1,35E-08   | 3,29E-07   | MYOF    |
| ENSGALG00000007056 | 2832,90477 | 1,069890641 | 0,15949999 | 6,70777866 | 1,98E-11   | 7,06E-10   |         |
| ENSGALG00000014907 | 2488,06414 | 1,069885451 | 0,14008721 | 7,63728156 | 2,22E-14   | 1,15E-12   | DCBLD1  |
| ENSGALG00000006808 | 8235,96126 | 1,068278734 | 0,08180763 | 13,0584237 | 5,69E-39   | 1,34E-36   | TSPAN6  |
| ENSGALG00000022871 | 763,279385 | 1,067659168 | 0,16564303 | 6,44554255 | 1,15E-10   | 3,78E-09   |         |
| ENSGALG00000003011 | 132,477548 | 1,06001077  | 0,26925957 | 3,93676173 | 8,26E-05   | 0,00097279 | TOM1L1  |
| ENSGALG00000028708 | 5484,0424  | 1,054408367 | 0,12654693 | 8,33215293 | 7,94E-17   | 5,07E-15   |         |
| ENSGALG00000025773 | 389,005412 | 1,052013322 | 0,20058054 | 5,24484243 | 1,56E-07   | 3,20E-06   |         |
| ENSGALG00000001629 | 48,4307098 | 1,051770302 | 0,27008877 | 3,89416521 | 9,85E-05   | 0,00113395 |         |
| ENSGALG00000006958 | 461,662682 | 1,051053707 | 0,19372591 | 5,42546797 | 5,78E-08   | 1,28E-06   | COL27A1 |
| ENSGALG00000026534 | 317,277092 | 1,050613394 | 0,22283472 | 4,71476524 | 2,42E-06   | 4,08E-05   |         |
| ENSGALG00000001020 | 6102,64046 | 1,049473012 | 0,13282357 | 7,90125574 | 2,76E-15   | 1,54E-13   |         |
| ENSGALG00000008623 | 472,488323 | 1,04510086  | 0,23119186 | 4,52049152 | 6,17E-06   | 9,70E-05   | TOR4A   |
| ENSGALG00000028602 | 4340,00904 | 1,04212846  | 0,26450876 | 3,93986374 | 8,15E-05   | 0,00096378 |         |
| ENSGALG00000006310 | 433,388773 | 1,04012476  | 0,19660584 | 5,2904063  | 1,22E-07   | 2,55E-06   |         |
| ENSGALG00000010035 | 1735,92924 | 1,03790767  | 0,15536856 | 6,68029407 | 2,38E-11   | 8,43E-10   | NR3C2   |
| ENSGALG00000013021 | 8977,79318 | 1,037759509 | 0,12348858 | 8,40368799 | 4,33E-17   | 2,78E-15   |         |
| ENSGALG00000014815 | 1413,97594 | 1,036175342 | 0,13546391 | 7,64908786 | 2,02E-14   | 1,05E-12   |         |
| ENSGALG00000012594 | 522,648656 | 1,03128421  | 0,20236132 | 5,09625171 | 3,46E-07   | 6,79E-06   | NTRK2   |
| ENSGALG00000006472 | 535,008316 | 1,030705214 | 0,20247632 | 5,09049761 | 3,57E-07   | 6,97E-06   |         |
| ENSGALG00000017411 | 67,4262747 | 1,030664685 | 0,27683047 | 3,72308975 | 0,0001968  | 0,00206178 | RXFP3   |
| ENSGALG00000023355 | 60,0806602 | 1,029241933 | 0,27415306 | 3,75426024 | 0,00017385 | 0,00185084 | TMEM154 |
| ENSGALG00000011609 | 3308,43376 | 1,027774555 | 0,27692763 | 3,71134712 | 0,00020616 | 0,00214725 |         |
| ENSGALG00000009129 | 1054,989   | 1,026339944 | 0,17522926 | 5,85712656 | 4,71E-09   | 1,21E-07   | DLX5    |
| ENSGALG00000004393 | 1206,90024 | 1,024579421 | 0,20985019 | 4,88243272 | 1,05E-06   | 1,89E-05   |         |
| ENSGALG00000007646 | 1017,38466 | 1,023532832 | 0,27175014 | 3,76644827 | 0,00016559 | 0,00177191 |         |
| ENSGALG00000016841 | 8687,62321 | 1,021854986 | 0,1195056  | 8,55068686 | 1,22E-17   | 8,23E-16   |         |
| ENSGALG00000006252 | 11554,9175 | 1,021389981 | 0,14561324 | 7,01440332 | 2,31E-12   | 9,35E-11   | LMO4    |
| ENSGALG00000023430 | 94,0381071 | 1,019281603 | 0,25211693 | 4,04289225 | 5,28E-05   | 0,00065195 |         |
| ENSGALG00000008491 | 3560,03676 | 1,018906247 | 0,13531729 | 7,52975657 | 5,08E-14   | 2,52E-12   |         |
| ENSGALG00000008856 | 397,953846 | 1,015823816 | 0,23484575 | 4,32549368 | 1,52E-05   | 0,00021609 |         |
| ENSGALG00000006638 | 1878,73274 | 1,014405382 | 0,11908476 | 8,51834775 | 1,62E-17   | 1,07E-15   | GRIK4   |
| ENSGALG00000028294 | 3072,93213 | 1,012130398 | 0,11397222 | 8,88050124 | 6,66E-19   | 4,90E-17   | VWA5B2  |
| ENSGALG00000002532 | 98,8821618 | 1,010182876 | 0,27499589 | 3,67344716 | 0,0002393  | 0,00244759 | GJA4    |
| ENSGALG00000014961 | 54,1316457 | 1,009675076 | 0,26059966 | 3,87442974 | 0,00010687 | 0,00122202 |         |
| ENSGALG00000007069 | 496,352261 | 1,009530133 | 0,21308127 | 4,73777041 | 2,16E-06   | 3,67E-05   |         |
| ENSGALG00000006908 | 12363,8802 | 1,006453251 | 0,11636849 | 8,6488472  | 5,20E-18   | 3,64E-16   | DLG1    |
| ENSGALG00000015440 | 150,286833 | 1,001448719 | 0,25673749 | 3,90067193 | 9,59E-05   | 0,00110798 |         |
| ENSGALG00000001419 | 1796,40392 | 0,999950253 | 0,12013706 | 8,32341193 | 8,55E-17   | 5,43E-15   | DAB2IP  |
| ENSGALG00000015208 | 5846,95619 | 0,998078994 | 0,1312595  | 7,60386116 | 2,87E-14   | 1,46E-12   | ROR2    |
| ENSGALG00000011623 | 8193,27422 | 0,997864905 | 0,27138614 | 3,67691917 | 0,00023607 | 0,00241849 | ADAMTS3 |
| ENSGALG00000010588 | 53,1286773 | 0,996815581 | 0,26205985 | 3,80377066 | 0,00014251 | 0,00155339 |         |
| ENSGALG00000011963 | 622,99738  | 0,995736113 | 0,16724263 | 5,95384154 | 2,62E-09   | 6,94E-08   | PRDM5   |
| ENSGALG00000008918 | 750,133591 | 0,995278864 | 0,19014125 | 5,23441849 | 1,66E-07   | 3,37E-06   | LAMP5   |
| ENSGALG00000013738 | 4323,62842 | 0,994196056 | 0,10739219 | 9,2576201  | 2,09E-20   | 1,82E-18   | OPTN    |
| ENSGALG00000011137 | 93,3711188 | 0,990105855 | 0,27694617 | 3,57508407 | 0,00035012 | 0,00339345 |         |
| ENSGALG00000021812 | 73,5735967 | 0,986192682 | 0,27617874 | 3,57084933 | 0,00035583 | 0,00343178 |         |
| ENSGALG00000006717 | 1503,28109 | 0,985550396 | 0,24782699 | 3,97676777 | 6,99E-05   | 0,00083864 |         |
| ENSGALG00000003149 | 1610,9192  | 0,985359473 | 0,14766495 | 6,67294075 | 2,51E-11   | 8,83E-10   |         |
| ENSGALG00000004917 | 473,928512 | 0,985260253 | 0,2036331  | 4,83840905 | 1,31E-06   | 2,33E-05   |         |
| ENSGALG00000005990 | 258,942154 | 0,985024441 | 0,26677048 | 3,6924042  | 0,00022214 | 0,00229463 |         |
| ENSGALG00000005692 | 405,777143 | 0,983308202 | 0,24246612 | 4,05544582 | 5,00E-05   | 0,00062331 |         |
| ENSGALG00000020723 | 739,146919 | 0,981929794 | 0,17104516 | 5,74076334 | 9,43E-09   | 2,33E-07   |         |
| ENSGALG00000016537 | 9995,53899 | 0,979050265 | 0,13793185 | 7,09807238 | 1,27E-12   | 5,29E-11   | SCML2   |
| ENSGALG00000027497 | 260,124381 | 0,976598532 | 0,22923317 | 4,26028447 | 2,04E-05   | 0,00027881 |         |
| ENSGALG00000004930 | 264,560406 | 0,975284752 | 0,27532773 | 3,54226849 | 0,0003967  | 0,00376505 | HRH1    |
| ENSGALG00000016143 | 2862,24797 | 0,975263193 | 0,16498108 | 5,91136394 | 3,39E-09   | 8,88E-08   |         |
| ENSGALG00000010926 | 130,297678 | 0,975212806 | 0,27472538 | 3,54977322 | 0,00038556 | 0,00367048 |         |
| ENSGALG00000012808 | 5197,90929 | 0,972939427 | 0,12111181 | 8,03339831 | 9,48E-16   | 5,57E-14   | CDYL    |



|                    |            |             |            |            |            |            |          |
|--------------------|------------|-------------|------------|------------|------------|------------|----------|
| ENSGALG00000003739 | 38757,8816 | 0,97006222  | 0,0963384  | 10,0693205 | 7,55E-24   | 8,74E-22   |          |
| ENSGALG00000003939 | 112,384247 | 0,968631016 | 0,26679037 | 3,63068202 | 0,00028267 | 0,00282651 |          |
| ENSGALG00000007343 | 72,8603799 | 0,967183937 | 0,2759661  | 3,50472014 | 0,00045709 | 0,00421349 |          |
| ENSGALG00000016341 | 139,195007 | 0,965199253 | 0,25730295 | 3,75121721 | 0,00017598 | 0,00186552 |          |
| ENSGALG00000014343 | 785,569079 | 0,963080504 | 0,16453536 | 5,85333465 | 4,82E-09   | 1,24E-07   |          |
| ENSGALG00000002509 | 14144,0875 | 0,962423205 | 0,119871   | 8,0288245  | 9,84E-16   | 5,75E-14   |          |
| ENSGALG00000021879 | 34,5191458 | 0,950789217 | 0,2438749  | 3,89867607 | 9,67E-05   | 0,00111509 |          |
| ENSGALG00000006614 | 57,8438472 | 0,950175613 | 0,27642148 | 3,437416   | 0,00058729 | 0,00519918 |          |
| ENSGALG00000006786 | 1099,77465 | 0,950169855 | 0,14131213 | 6,72390847 | 1,77E-11   | 6,34E-10   |          |
| ENSGALG00000016843 | 6732,69779 | 0,946578268 | 0,12267336 | 7,71624989 | 1,20E-14   | 6,38E-13   | COL4A2   |
| ENSGALG00000027805 | 264,08193  | 0,945988714 | 0,26256163 | 3,60292061 | 0,00031466 | 0,00309685 |          |
| ENSGALG00000017135 | 1317,87874 | 0,945725278 | 0,15347839 | 6,16194417 | 7,19E-10   | 2,11E-08   | CRYL1    |
| ENSGALG00000011336 | 41,6337265 | 0,944781785 | 0,2663112  | 3,54766074 | 0,00038867 | 0,00369723 |          |
| ENSGALG00000012224 | 1861,1774  | 0,94448356  | 0,15084874 | 6,26112991 | 3,82E-10   | 1,18E-08   |          |
| ENSGALG00000008014 | 268,980372 | 0,943508119 | 0,22646821 | 4,16618353 | 3,10E-05   | 0,00040481 | CEBPB    |
| ENSGALG00000026892 | 80,5665735 | 0,943046494 | 0,2766565  | 3,40872711 | 0,00065267 | 0,00568143 |          |
| ENSGALG00000010707 | 23,462609  | 0,94082246  | 0,24072754 | 3,90824608 | 9,30E-05   | 0,0010798  | GPR68    |
| ENSGALG00000015008 | 34,4613342 | 0,940194042 | 0,26427134 | 3,55768451 | 0,00037414 | 0,00358079 | ZNF366   |
| ENSGALG00000001405 | 278,869771 | 0,939567412 | 0,21873168 | 4,29552511 | 1,74E-05   | 0,00024223 | IRF6     |
| ENSGALG00000010163 | 10137,7585 | 0,938977707 | 0,10980213 | 8,55154343 | 1,21E-17   | 8,21E-16   | LGR5     |
| ENSGALG00000004662 | 3197,84361 | 0,937959127 | 0,14071695 | 6,66557313 | 2,64E-11   | 9,24E-10   | DISP3    |
| ENSGALG00000010836 | 1075,45486 | 0,937907565 | 0,15481833 | 6,05811696 | 1,38E-09   | 3,83E-08   |          |
| ENSGALG00000008206 | 194,334171 | 0,934029761 | 0,24433133 | 3,82279978 | 0,00013194 | 0,00145547 | TESC     |
| ENSGALG00000002397 | 809,586463 | 0,927215999 | 0,22531285 | 4,11523792 | 3,87E-05   | 0,00049258 | PSPH     |
| ENSGALG00000010412 | 554,029025 | 0,925287079 | 0,19363821 | 4,77843223 | 1,77E-06   | 3,07E-05   | WWTR1    |
| ENSGALG00000026370 | 105,807662 | 0,924816521 | 0,26789368 | 3,45217742 | 0,00055608 | 0,00495797 |          |
| ENSGALG00000004519 | 193,098236 | 0,924449735 | 0,26575159 | 3,47862353 | 0,000504   | 0,00456847 | TRPV2    |
| ENSGALG00000007039 | 10074,0502 | 0,92399781  | 0,125208   | 7,37970282 | 1,59E-13   | 7,38E-12   |          |
| ENSGALG00000008778 | 5061,18074 | 0,923325024 | 0,13889594 | 6,6476025  | 2,98E-11   | 1,04E-09   | SPRED2   |
| ENSGALG00000010785 | 431,614767 | 0,922406238 | 0,22004896 | 4,19182269 | 2,77E-05   | 0,00036514 | ACOT11   |
| ENSGALG00000015164 | 3009,10926 | 0,920081875 | 0,10753234 | 8,55632742 | 1,17E-17   | 7,92E-16   |          |
| ENSGALG00000014855 | 3796,22691 | 0,916891226 | 0,15123034 | 6,06287898 | 1,34E-09   | 3,74E-08   |          |
| ENSGALG00000016443 | 4759,48054 | 0,912806646 | 0,13882964 | 6,57501249 | 4,86E-11   | 1,65E-09   | HPCAL1   |
| ENSGALG00000023193 | 891,994507 | 0,912803471 | 0,15632952 | 5,83897064 | 5,25E-09   | 1,34E-07   |          |
| ENSGALG00000007667 | 897,591606 | 0,910790115 | 0,15122323 | 6,02281894 | 1,71E-09   | 4,71E-08   | GPR158   |
| ENSGALG00000007416 | 138,697657 | 0,91055725  | 0,26535747 | 3,43143628 | 0,00060039 | 0,00530016 | CD3E     |
| ENSGALG00000012533 | 31364,4878 | 0,909053879 | 0,13047228 | 6,96741015 | 3,23E-12   | 1,27E-10   |          |
| ENSGALG00000011618 | 1026,95651 | 0,908730543 | 0,18188258 | 4,99624825 | 5,85E-07   | 1,10E-05   | ADSSL1   |
| ENSGALG00000015624 | 28928,123  | 0,906952704 | 0,26927951 | 3,36807168 | 0,00075696 | 0,00646335 | VCAN     |
| ENSGALG00000001645 | 772,05714  | 0,906502233 | 0,18722125 | 4,84187682 | 1,29E-06   | 2,30E-05   | KCNT1    |
| ENSGALG00000011258 | 41539,9101 | 0,899386948 | 0,13199364 | 6,81386582 | 9,50E-12   | 3,51E-10   |          |
| ENSGALG00000003401 | 97,8434771 | 0,897409124 | 0,27523071 | 3,26057042 | 0,00111188 | 0,00890653 | FBXL22   |
| ENSGALG00000017652 | 38,6817197 | 0,894447523 | 0,26978    | 3,31547007 | 0,00091489 | 0,00757906 | TTC9     |
| ENSGALG00000004189 | 665,542257 | 0,89261736  | 0,19559277 | 4,56365205 | 5,03E-06   | 8,01E-05   | MAFK     |
| ENSGALG00000025723 | 106,160903 | 0,89142204  | 0,27513226 | 3,23997649 | 0,0011954  | 0,00944015 |          |
| ENSGALG00000016308 | 4475,13284 | 0,888326042 | 0,09104509 | 9,75698981 | 1,72E-22   | 1,77E-20   | MYC      |
| ENSGALG00000007952 | 16328,0045 | 0,887725324 | 0,11490596 | 7,72566813 | 1,11E-14   | 5,95E-13   | AMOT     |
| ENSGALG00000001281 | 97,6098799 | 0,886212495 | 0,27180262 | 3,26050025 | 0,00111216 | 0,00890653 |          |
| ENSGALG00000012111 | 193,797146 | 0,886059032 | 0,25134734 | 3,52523742 | 0,0004231  | 0,00396449 | TMEM37   |
| ENSGALG00000010148 | 95,0993319 | 0,885936489 | 0,27329578 | 3,24167639 | 0,00118829 | 0,00940681 |          |
| ENSGALG00000001276 | 18245,4455 | 0,885240877 | 0,11268934 | 7,8555867  | 3,98E-15   | 2,20E-13   | HOXB9    |
| ENSGALG00000015896 | 1982,50233 | 0,883690573 | 0,14767564 | 5,98399687 | 2,18E-09   | 5,84E-08   |          |
| ENSGALG00000010090 | 526,624476 | 0,882987641 | 0,22809712 | 3,87110386 | 0,00010834 | 0,0012348  | FAM160A1 |
| ENSGALG00000009594 | 606,263065 | 0,882488341 | 0,19693947 | 4,48101319 | 7,43E-06   | 0,00011388 | RARRES1  |
| ENSGALG00000005256 | 9190,22784 | 0,880582454 | 0,23610272 | 3,72965825 | 0,00019174 | 0,00201889 | EPHA4    |
| ENSGALG00000009179 | 4215,94774 | 0,880187457 | 0,10683081 | 8,23907883 | 1,74E-16   | 1,08E-14   | TNFSF10  |
| ENSGALG00000011172 | 2449,32108 | 0,879786034 | 0,13379316 | 6,57571768 | 4,84E-11   | 1,65E-09   |          |
| ENSGALG00000027947 | 77,7692928 | 0,877628202 | 0,26244862 | 3,34400006 | 0,0008258  | 0,00697665 | GHSR     |
| ENSGALG00000027885 | 26,4620215 | 0,876800098 | 0,23993489 | 3,65432511 | 0,00025786 | 0,00260968 | C4orf19  |
| ENSGALG00000014783 | 8965,42611 | 0,875888949 | 0,11142269 | 7,86095696 | 3,81E-15   | 2,12E-13   |          |
| ENSGALG00000009405 | 358,011724 | 0,875608773 | 0,20294284 | 4,31455849 | 1,60E-05   | 0,00022558 | GRIA2    |
| ENSGALG00000010996 | 3029,60967 | 0,875351394 | 0,11601158 | 7,54537966 | 4,51E-14   | 2,26E-12   | IRF2BP2  |

|                    |            |             |            |            |            |            |         |
|--------------------|------------|-------------|------------|------------|------------|------------|---------|
| ENSGALG00000028759 | 391,741267 | 0,87268698  | 0,23549591 | 3,70574156 | 0,00021077 | 0,00219166 | LYPD6B  |
| ENSGALG00000008018 | 469,138933 | 0,868526004 | 0,20965704 | 4,14260361 | 3,43E-05   | 0,00044328 | SNAI1   |
| ENSGALG00000006008 | 593,4561   | 0,867963452 | 0,20178146 | 4,30150244 | 1,70E-05   | 0,0002371  | HOMER2  |
| ENSGALG00000029023 | 178,138305 | 0,865902724 | 0,26156953 | 3,3104113  | 0,00093159 | 0,00768178 | DMRTB1  |
| ENSGALG00000016909 | 3574,55237 | 0,864393738 | 0,09752748 | 8,86307897 | 7,78E-19   | 5,69E-17   | NDFIP2  |
| ENSGALG00000026582 | 1114,9679  | 0,863598751 | 0,1902411  | 4,53949614 | 5,64E-06   | 8,89E-05   |         |
| ENSGALG00000027684 | 3428,7366  | 0,863457403 | 0,14910293 | 5,79101571 | 7,00E-09   | 1,75E-07   |         |
| ENSGALG00000014349 | 1819,66371 | 0,860574566 | 0,11955806 | 7,19796341 | 6,11E-13   | 2,65E-11   |         |
| ENSGALG00000011613 | 475,600449 | 0,857977883 | 0,20239708 | 4,23908233 | 2,24E-05   | 0,0003031  |         |
| ENSGALG00000001617 | 271,795228 | 0,855845667 | 0,23372685 | 3,6617345  | 0,00025051 | 0,0025415  | CAMKK1  |
| ENSGALG00000001926 | 1199,81634 | 0,853283247 | 0,15483373 | 5,51096475 | 3,57E-08   | 8,22E-07   | HSPB1   |
| ENSGALG00000015180 | 12680,3183 | 0,851097646 | 0,10970107 | 7,75833511 | 8,61E-15   | 4,64E-13   | PSAT1   |
| ENSGALG00000009396 | 1375,97204 | 0,850250642 | 0,16438706 | 5,17224786 | 2,31E-07   | 4,59E-06   |         |
| ENSGALG00000009172 | 460,012151 | 0,849588562 | 0,22136087 | 3,83802504 | 0,00012403 | 0,001384   | OSBPL6  |
| ENSGALG00000016807 | 8544,75416 | 0,848101313 | 0,11909181 | 7,12140736 | 1,07E-12   | 4,55E-11   |         |
| ENSGALG00000010291 | 5393,74102 | 0,844497871 | 0,10367256 | 8,14581883 | 3,77E-16   | 2,28E-14   | RBPMS   |
| ENSGALG00000000977 | 7029,01558 | 0,842188766 | 0,08563672 | 9,83443558 | 8,00E-23   | 8,48E-21   | MAPKAP1 |
| ENSGALG00000009530 | 719,235997 | 0,841159622 | 0,18836636 | 4,46555117 | 7,99E-06   | 0,0001212  | PDZRN4  |
| ENSGALG00000004155 | 211,984568 | 0,841077447 | 0,24078857 | 3,49301238 | 0,0004776  | 0,00436403 | MYOM3   |
| ENSGALG00000009378 | 1120,38163 | 0,840979613 | 0,13880777 | 6,05859175 | 1,37E-09   | 3,83E-08   | PDGFC   |
| ENSGALG00000002335 | 624,130373 | 0,840686726 | 0,18168554 | 4,62715265 | 3,71E-06   | 6,03E-05   | DOCK3   |
| ENSGALG00000002623 | 461,663405 | 0,839503746 | 0,18687975 | 4,49221356 | 7,05E-06   | 0,00010872 | PCOLCE2 |
| ENSGALG00000005410 | 3123,4698  | 0,838361241 | 0,15163748 | 5,52872037 | 3,23E-08   | 7,46E-07   |         |
| ENSGALG00000007932 | 1262,37356 | 0,837645303 | 0,16803809 | 4,98485361 | 6,20E-07   | 1,16E-05   | TRAF6   |
| ENSGALG00000015409 | 14646,8005 | 0,837042297 | 0,10986863 | 7,61857419 | 2,56E-14   | 1,32E-12   | PROS1   |
| ENSGALG00000012278 | 12900,8817 | 0,835859144 | 0,23517071 | 3,55426545 | 0,00037904 | 0,00361936 |         |
| ENSGALG00000010156 | 256,288262 | 0,833499217 | 0,2396958  | 3,47732084 | 0,00050645 | 0,0045874  |         |
| ENSGALG00000001220 | 3532,90233 | 0,831042878 | 0,11299613 | 7,35461342 | 1,91E-13   | 8,81E-12   | HERPUD1 |
| ENSGALG00000013085 | 2051,84727 | 0,830893947 | 0,12691125 | 6,54704716 | 5,87E-11   | 1,98E-09   | PTPRO   |
| ENSGALG00000025770 | 327,819551 | 0,830841194 | 0,24237973 | 3,42784926 | 0,00060838 | 0,00535557 |         |
| ENSGALG00000012354 | 2002,91372 | 0,829092837 | 0,15052249 | 5,50809953 | 3,63E-08   | 8,31E-07   |         |
| ENSGALG00000000639 | 543,002187 | 0,827648848 | 0,21824285 | 3,79232975 | 0,00014924 | 0,00161912 | LRRN2   |
| ENSGALG00000005768 | 4764,60581 | 0,825923962 | 0,11172719 | 7,39232759 | 1,44E-13   | 6,76E-12   | ETV5    |
| ENSGALG00000011232 | 2354,98602 | 0,825691237 | 0,13504902 | 6,11401152 | 9,72E-10   | 2,77E-08   |         |
| ENSGALG00000017246 | 1270,40827 | 0,825125037 | 0,15896962 | 5,19045723 | 2,10E-07   | 4,19E-06   | ME3     |
| ENSGALG00000008883 | 4099,49868 | 0,82333394  | 0,11713657 | 7,02883754 | 2,08E-12   | 8,57E-11   | TCF7L2  |
| ENSGALG00000020899 | 521,609979 | 0,823141433 | 0,24736905 | 3,3275846  | 0,00087602 | 0,00731033 |         |
| ENSGALG00000003726 | 904,249522 | 0,818923475 | 0,22585036 | 3,625956   | 0,00028789 | 0,00286954 | EGFLAM  |
| ENSGALG00000010664 | 324,510001 | 0,817672769 | 0,23994525 | 3,40774723 | 0,00065502 | 0,00569168 | KIF26B  |
| ENSGALG00000002054 | 1352,81303 | 0,816030183 | 0,13128078 | 6,21591508 | 5,10E-10   | 1,54E-08   |         |
| ENSGALG00000008670 | 1990,92325 | 0,815447938 | 0,13744115 | 5,9330699  | 2,97E-09   | 7,83E-08   |         |
| ENSGALG00000013683 | 16575,6485 | 0,810200928 | 0,12018138 | 6,74148471 | 1,57E-11   | 5,65E-10   | ARID1B  |
| ENSGALG00000012848 | 3319,46891 | 0,809997189 | 0,15987767 | 5,06635591 | 4,06E-07   | 7,83E-06   |         |
| ENSGALG00000014872 | 561,414638 | 0,806209646 | 0,23662254 | 3,40715487 | 0,00065644 | 0,0056984  | FGF10   |
| ENSGALG00000009155 | 822,192391 | 0,800986669 | 0,16316786 | 4,90897338 | 9,16E-07   | 1,68E-05   |         |
| ENSGALG00000005430 | 836,618226 | 0,79963845  | 0,20651888 | 3,87198711 | 0,00010795 | 0,00123209 | ALS2CL  |
| ENSGALG00000012849 | 4391,56992 | 0,79670503  | 0,13188371 | 6,04096596 | 1,53E-09   | 4,24E-08   | SLC37A3 |
| ENSGALG00000012277 | 3279,13345 | 0,79518636  | 0,11025611 | 7,21217515 | 5,51E-13   | 2,42E-11   |         |
| ENSGALG00000015952 | 320,695046 | 0,793177929 | 0,23917365 | 3,31632662 | 0,00091209 | 0,00756087 |         |
| ENSGALG00000004599 | 1177,35629 | 0,791092143 | 0,17593216 | 4,49657499 | 6,91E-06   | 0,00010704 |         |
| ENSGALG00000026631 | 639,083895 | 0,790472215 | 0,23279997 | 3,39549971 | 0,00068503 | 0,00592197 | HOXA10  |
| ENSGALG00000002443 | 515,246567 | 0,789654091 | 0,18384496 | 4,29521754 | 1,75E-05   | 0,0002423  | FBXL16  |
| ENSGALG00000008445 | 716,590826 | 0,788973502 | 0,17118936 | 4,60877658 | 4,05E-06   | 6,52E-05   | SLC24A3 |
| ENSGALG00000009718 | 365,400186 | 0,788380099 | 0,1998647  | 3,94456899 | 7,99E-05   | 0,00094788 | FAM53B  |
| ENSGALG00000009252 | 6799,64958 | 0,7810557   | 0,11275794 | 6,92683575 | 4,30E-12   | 1,68E-10   |         |
| ENSGALG00000026034 | 890,686008 | 0,780909637 | 0,16319128 | 4,7852411  | 1,71E-06   | 2,98E-05   | RGS17   |
| ENSGALG00000002598 | 7375,09654 | 0,778822215 | 0,08757756 | 8,89294263 | 5,95E-19   | 4,46E-17   | TPST1   |
| ENSGALG00000005310 | 792,651331 | 0,773499973 | 0,20804946 | 3,71786588 | 0,00020091 | 0,0020996  |         |
| ENSGALG00000021238 | 292,286817 | 0,771321549 | 0,21541142 | 3,58069015 | 0,00034269 | 0,00333594 |         |
| ENSGALG00000026355 | 316,135871 | 0,769808548 | 0,22820508 | 3,37331911 | 0,00074268 | 0,00636312 |         |
| ENSGALG00000004158 | 2408,26029 | 0,769428918 | 0,12659815 | 6,07772646 | 1,22E-09   | 3,45E-08   |         |
| ENSGALG00000001346 | 433,934694 | 0,76776324  | 0,23273948 | 3,29880968 | 0,00097096 | 0,00794876 |         |



|                    |            |             |            |            |            |            |          |
|--------------------|------------|-------------|------------|------------|------------|------------|----------|
| ENSGALG00000013124 | 3883,6626  | 0,765332021 | 0,13324393 | 5,74384156 | 9,26E-09   | 2,29E-07   | FHOD3    |
| ENSGALG00000025780 | 468,175583 | 0,762758431 | 0,19965686 | 3,82034666 | 0,00013326 | 0,00146485 | ITPRIP   |
| ENSGALG00000023886 | 345,558396 | 0,76245624  | 0,20569517 | 3,70672893 | 0,00020995 | 0,00218495 | ZNF804A  |
| ENSGALG00000011376 | 374,497295 | 0,758366172 | 0,20404377 | 3,71668381 | 0,00020185 | 0,00210768 | ANKRD9   |
| ENSGALG00000016069 | 4206,1542  | 0,758301426 | 0,09589383 | 7,90771867 | 2,62E-15   | 1,47E-13   |          |
| ENSGALG00000001000 | 105882,406 | 0,756534693 | 0,12130242 | 6,23676501 | 4,47E-10   | 1,36E-08   |          |
| ENSGALG00000013616 | 416,825405 | 0,749712043 | 0,2111769  | 3,55016123 | 0,000385   | 0,00366786 | OPRM1    |
| ENSGALG00000009145 | 1069,11169 | 0,74529577  | 0,2190544  | 3,40233194 | 0,00066813 | 0,00578387 |          |
| ENSGALG00000012012 | 5118,87574 | 0,743046962 | 0,14577197 | 5,09732411 | 3,44E-07   | 6,76E-06   |          |
| ENSGALG00000011319 | 11225,2963 | 0,737544915 | 0,09161073 | 8,05085711 | 8,22E-16   | 4,85E-14   | ADGRL3   |
| ENSGALG00000005512 | 7764,5793  | 0,736922168 | 0,10571311 | 6,97096281 | 3,15E-12   | 1,25E-10   |          |
| ENSGALG00000000505 | 339,344776 | 0,73643955  | 0,20375113 | 3,61440716 | 0,00030104 | 0,00298625 | KCNH6    |
| ENSGALG00000006138 | 2327,25759 | 0,736205494 | 0,17788661 | 4,13862223 | 3,49E-05   | 0,00045058 |          |
| ENSGALG00000003701 | 2093,50715 | 0,734267222 | 0,12693056 | 5,78479482 | 7,26E-09   | 1,81E-07   | SGMS1    |
| ENSGALG00000003043 | 2889,49683 | 0,734167184 | 0,12468763 | 5,88805143 | 3,91E-09   | 1,02E-07   |          |
| ENSGALG00000015250 | 1236,64137 | 0,732130121 | 0,18294116 | 4,00199787 | 6,28E-05   | 0,00075985 |          |
| ENSGALG00000028155 | 1607,60298 | 0,730708288 | 0,1348053  | 5,42047159 | 5,94E-08   | 1,31E-06   |          |
| ENSGALG00000003774 | 6718,46982 | 0,73043073  | 0,11984382 | 6,09485535 | 1,10E-09   | 3,11E-08   | ATP13A2  |
| ENSGALG00000005653 | 2602,66741 | 0,729875771 | 0,10427934 | 6,99923686 | 2,57E-12   | 1,03E-10   | NFKB2    |
| ENSGALG00000007501 | 443,889264 | 0,729453053 | 0,20909338 | 3,48864733 | 0,00048547 | 0,00442944 |          |
| ENSGALG00000025887 | 833,811929 | 0,729103686 | 0,19083714 | 3,8205545  | 0,00013315 | 0,00146485 | ATF3     |
| ENSGALG00000015184 | 6562,38853 | 0,727266294 | 0,09772755 | 7,44177369 | 9,93E-14   | 4,72E-12   |          |
| ENSGALG00000002955 | 1085,67322 | 0,725828311 | 0,20628485 | 3,51857296 | 0,00043387 | 0,00404688 | ADAMTSL2 |
| ENSGALG00000028935 | 4407,81779 | 0,725128037 | 0,09141746 | 7,9320517  | 2,16E-15   | 1,22E-13   | BCL10    |
| ENSGALG00000009381 | 14937,4753 | 0,723727203 | 0,11606588 | 6,23548619 | 4,50E-10   | 1,37E-08   |          |
| ENSGALG00000014441 | 1267,12755 | 0,722905404 | 0,15192936 | 4,75816803 | 1,95E-06   | 3,35E-05   |          |
| ENSGALG00000027352 | 11317,2552 | 0,722863534 | 0,10576918 | 6,83434951 | 8,24E-12   | 3,08E-10   |          |
| ENSGALG00000001370 | 1171,81779 | 0,722550699 | 0,15690532 | 4,60501077 | 4,12E-06   | 6,62E-05   | ADAMTS8  |
| ENSGALG00000007206 | 17,4582489 | 0,720355559 | 0,22314617 | 3,22817802 | 0,00124581 | 0,00980119 |          |
| ENSGALG00000015947 | 765,779345 | 0,718924866 | 0,22274381 | 3,22758633 | 0,00124839 | 0,00980672 |          |
| ENSGALG00000008163 | 14921,5324 | 0,713636421 | 0,10768275 | 6,62721234 | 3,42E-11   | 1,18E-09   | PSME4    |
| ENSGALG00000026727 | 425,717003 | 0,713627256 | 0,19018155 | 3,75234749 | 0,00017519 | 0,00186028 | SLC30A10 |
| ENSGALG00000028279 | 322,93543  | 0,711492754 | 0,21583535 | 3,29646077 | 0,00097911 | 0,00800505 | SNORD14  |
| ENSGALG00000007712 | 5151,87784 | 0,709640176 | 0,09468723 | 7,49457113 | 6,65E-14   | 3,25E-12   | MYO1B    |
| ENSGALG00000005423 | 1960,17378 | 0,707902433 | 0,13324908 | 5,31262534 | 1,08E-07   | 2,28E-06   | GRHPR    |
| ENSGALG00000015975 | 5061,20264 | 0,705892008 | 0,11070199 | 6,3765067  | 1,81E-10   | 5,84E-09   |          |
| ENSGALG00000002892 | 626,326751 | 0,704967282 | 0,1963291  | 3,59074262 | 0,00032974 | 0,00322241 |          |
| ENSGALG00000015310 | 3979,38646 | 0,701805821 | 0,09924244 | 7,07163008 | 1,53E-12   | 6,34E-11   |          |
| ENSGALG00000000452 | 1371,04529 | 0,701787311 | 0,16834665 | 4,16870367 | 3,06E-05   | 0,00040083 |          |
| ENSGALG00000002198 | 1124,31872 | 0,701337674 | 0,20146263 | 3,4812296  | 0,00049912 | 0,00452753 | FHOD1    |
| ENSGALG00000010522 | 10232,0506 | 0,699893806 | 0,1480305  | 4,72803795 | 2,27E-06   | 3,84E-05   |          |
| ENSGALG00000027983 | 1055,55115 | 0,699268766 | 0,16725899 | 4,18075434 | 2,91E-05   | 0,00038217 | TNK2     |
| ENSGALG00000010204 | 874,20571  | 0,699072042 | 0,16632037 | 4,20316555 | 2,63E-05   | 0,00034841 | KCNC2    |
| ENSGALG00000004088 | 3580,2986  | 0,695518825 | 0,10391048 | 6,69344229 | 2,18E-11   | 7,75E-10   | FNBP1    |
| ENSGALG00000008680 | 626,282132 | 0,694380448 | 0,18287186 | 3,79708749 | 0,00014641 | 0,00159251 |          |
| ENSGALG00000011266 | 760,864805 | 0,693047043 | 0,18382819 | 3,77008024 | 0,0001632  | 0,00174928 | PPM1K    |
| ENSGALG00000015721 | 1214,39078 | 0,692751518 | 0,18278823 | 3,78991313 | 0,0001507  | 0,00163213 | SVEP1    |
| ENSGALG00000012956 | 536,621695 | 0,692712504 | 0,21091071 | 3,28438757 | 0,00102204 | 0,00828563 | TMTC1    |
| ENSGALG00000011025 | 4159,539   | 0,69039215  | 0,09483213 | 7,28015057 | 3,33E-13   | 1,50E-11   |          |
| ENSGALG00000012211 | 4094,58636 | 0,688791118 | 0,10047528 | 6,85532894 | 7,11E-12   | 2,69E-10   | PDLIM5   |
| ENSGALG00000005065 | 974,960396 | 0,685705936 | 0,15970851 | 4,29348406 | 1,76E-05   | 0,00024393 | PLA2G4A  |
| ENSGALG00000016835 | 5266,33357 | 0,685225343 | 0,13174668 | 5,20108259 | 1,98E-07   | 3,97E-06   |          |
| ENSGALG00000012696 | 8253,81984 | 0,682603698 | 0,09998162 | 6,82729216 | 8,65E-12   | 3,21E-10   |          |
| ENSGALG00000016281 | 10145,7509 | 0,681257671 | 0,08559267 | 7,95929876 | 1,73E-15   | 9,93E-14   | DMD      |
| ENSGALG00000023725 | 1053,58774 | 0,679129782 | 0,15467581 | 4,39066583 | 1,13E-05   | 0,00016591 |          |
| ENSGALG00000003640 | 865,821934 | 0,678918743 | 0,16063195 | 4,22654863 | 2,37E-05   | 0,00031683 |          |
| ENSGALG00000027627 | 7249,84284 | 0,677661132 | 0,0846528  | 8,00518259 | 1,19E-15   | 6,94E-14   |          |
| ENSGALG00000027342 | 11212,2371 | 0,672830693 | 0,07880349 | 8,5380821  | 1,36E-17   | 9,08E-16   |          |
| ENSGALG00000011550 | 2837,22447 | 0,672556317 | 0,14266182 | 4,71433983 | 2,42E-06   | 4,08E-05   |          |
| ENSGALG00000027389 | 3615,54123 | 0,672548469 | 0,11214472 | 5,99714785 | 2,01E-09   | 5,41E-08   | RGS7BP   |
| ENSGALG00000002646 | 9732,02947 | 0,671803119 | 0,1449266  | 4,63547136 | 3,56E-06   | 5,80E-05   | FAM171B  |
| ENSGALG00000004612 | 5923,23561 | 0,671680213 | 0,09027919 | 7,44003379 | 1,01E-13   | 4,77E-12   | MTHFR    |

|                    |            |             |            |            |            |            |          |
|--------------------|------------|-------------|------------|------------|------------|------------|----------|
| ENSGALG00000014106 | 16074,824  | 0,667075995 | 0,09963033 | 6,69551116 | 2,15E-11   | 7,66E-10   | PPFIBP1  |
| ENSGALG00000013342 | 2747,02869 | 0,666913547 | 0,1119687  | 5,95624957 | 2,58E-09   | 6,85E-08   | GBX2     |
| ENSGALG00000007704 | 16606,5878 | 0,666805577 | 0,12692892 | 5,25337789 | 1,49E-07   | 3,07E-06   |          |
| ENSGALG00000023876 | 3391,40413 | 0,666027019 | 0,11746061 | 5,67021584 | 1,43E-08   | 3,46E-07   |          |
| ENSGALG00000015887 | 11962,9806 | 0,665885713 | 0,11836362 | 5,62576338 | 1,85E-08   | 4,42E-07   | URB1     |
| ENSGALG00000003957 | 1955,41186 | 0,665113393 | 0,12648287 | 5,25852528 | 1,45E-07   | 2,99E-06   |          |
| ENSGALG00000006872 | 8598,0072  | 0,664035354 | 0,09325855 | 7,12036955 | 1,08E-12   | 4,56E-11   | PISD     |
| ENSGALG00000004437 | 1051,52128 | 0,662144004 | 0,15643348 | 4,23275119 | 2,31E-05   | 0,00031017 | LHFPL2   |
| ENSGALG00000014957 | 23554,8466 | 0,661960443 | 0,09128513 | 7,25156958 | 4,12E-13   | 1,84E-11   | WDR1     |
| ENSGALG00000002655 | 5806,05662 | 0,657486198 | 0,10761985 | 6,10933924 | 1,00E-09   | 2,84E-08   | ITGAV    |
| ENSGALG00000004661 | 7333,89219 | 0,654997852 | 0,09584164 | 6,83416796 | 8,25E-12   | 3,08E-10   |          |
| ENSGALG00000004231 | 624,271591 | 0,654722209 | 0,17330476 | 3,77786627 | 0,00015818 | 0,00170573 | IFNLR1   |
| ENSGALG00000011770 | 13005,5067 | 0,65450966  | 0,08870671 | 7,37835601 | 1,60E-13   | 7,42E-12   | UMPS     |
| ENSGALG00000016803 | 4124,86158 | 0,652622211 | 0,11026512 | 5,91866387 | 3,25E-09   | 8,51E-08   | ST6GAL2  |
| ENSGALG00000016719 | 6369,91266 | 0,652460747 | 0,11253545 | 5,79782427 | 6,72E-09   | 1,69E-07   | TNFRSF21 |
| ENSGALG00000010186 | 4216,82392 | 0,652306301 | 0,0936837  | 6,96285777 | 3,33E-12   | 1,31E-10   |          |
| ENSGALG00000014545 | 998,185181 | 0,650360352 | 0,17599459 | 3,69534294 | 0,00021959 | 0,00227389 |          |
| ENSGALG00000005906 | 1908,90153 | 0,646437734 | 0,11565287 | 5,5894654  | 2,28E-08   | 5,39E-07   |          |
| ENSGALG00000004042 | 4037,76912 | 0,646319325 | 0,11291506 | 5,72394258 | 1,04E-08   | 2,56E-07   |          |
| ENSGALG00000018479 | 474,539705 | 0,645095331 | 0,19673783 | 3,27895931 | 0,00104191 | 0,00843028 |          |
| ENSGALG00000012877 | 2598,2138  | 0,643827392 | 0,1203305  | 5,35049194 | 8,77E-08   | 1,87E-06   | CREB3L2  |
| ENSGALG00000013031 | 981,078598 | 0,641018743 | 0,1528676  | 4,19329383 | 2,75E-05   | 0,00036355 | CECR1    |
| ENSGALG00000027835 | 4356,75822 | 0,637590923 | 0,09597243 | 6,64348014 | 3,06E-11   | 1,06E-09   | PCBD1    |
| ENSGALG00000024346 | 783,051886 | 0,637233355 | 0,1537054  | 4,14580971 | 3,39E-05   | 0,00043848 |          |
| ENSGALG00000002248 | 5849,29235 | 0,635943683 | 0,08808525 | 7,21963901 | 5,21E-13   | 2,30E-11   |          |
| ENSGALG00000026776 | 1287,36825 | 0,634230033 | 0,13457396 | 4,71287338 | 2,44E-06   | 4,10E-05   | TIGAR    |
| ENSGALG00000008318 | 17655,4148 | 0,633974687 | 0,08385645 | 7,56023739 | 4,02E-14   | 2,02E-12   | SLK      |
| ENSGALG00000015842 | 5393,93615 | 0,632020307 | 0,09677563 | 6,53077971 | 6,54E-11   | 2,19E-09   | TIAM1    |
| ENSGALG00000004181 | 1516,86359 | 0,628709896 | 0,12659877 | 4,96616114 | 6,83E-07   | 1,27E-05   |          |
| ENSGALG00000014922 | 13357,9815 | 0,627329029 | 0,08060516 | 7,7827402  | 7,10E-15   | 3,88E-13   | ROCK1    |
| ENSGALG00000002602 | 2698,72514 | 0,625832331 | 0,15063415 | 4,15465119 | 3,26E-05   | 0,00042362 |          |
| ENSGALG00000012726 | 94562,7089 | 0,625221924 | 0,1022285  | 6,11592611 | 9,60E-10   | 2,75E-08   |          |
| ENSGALG00000027696 | 2435,05731 | 0,622663255 | 0,13427256 | 4,6373083  | 3,53E-06   | 5,76E-05   |          |
| ENSGALG00000008222 | 3620,89787 | 0,616961764 | 0,10986009 | 5,61588627 | 1,96E-08   | 4,66E-07   | SLC26A5  |
| ENSGALG00000011435 | 5310,48391 | 0,614694006 | 0,09295677 | 6,61268659 | 3,77E-11   | 1,29E-09   |          |
| ENSGALG00000001728 | 1163,49973 | 0,610499448 | 0,14119355 | 4,32384786 | 1,53E-05   | 0,00021746 | NACC2    |
| ENSGALG00000026093 | 847,433551 | 0,608505556 | 0,17097819 | 3,55896599 | 0,00037232 | 0,0035661  |          |
| ENSGALG00000019397 | 12768,6069 | 0,608262914 | 0,09652905 | 6,30134598 | 2,95E-10   | 9,30E-09   | CERK     |
| ENSGALG00000004820 | 960,081767 | 0,608049873 | 0,1426222  | 4,26336072 | 2,01E-05   | 0,0002756  | FAM57A   |
| ENSGALG00000026468 | 6537,04521 | 0,607177306 | 0,09886931 | 6,14121105 | 8,19E-10   | 2,38E-08   | CHSY1    |
| ENSGALG00000000795 | 1331,44868 | 0,605895026 | 0,13162727 | 4,60311177 | 4,16E-06   | 6,68E-05   | MFSD12   |
| ENSGALG00000017199 | 2734,428   | 0,605852032 | 0,15883889 | 3,81425504 | 0,00013659 | 0,00149751 | MAML2    |
| ENSGALG00000008903 | 2249,72466 | 0,604190258 | 0,15751307 | 3,83581031 | 0,00012515 | 0,00139302 | SSFA2    |
| ENSGALG00000011537 | 2507,94825 | 0,603878853 | 0,15538039 | 3,88645484 | 0,00010172 | 0,00116734 | PDE10A   |
| ENSGALG00000006939 | 25023,5764 | 0,603844144 | 0,10825219 | 5,57812385 | 2,43E-08   | 5,73E-07   | PFKP     |
| ENSGALG00000007434 | 2113,20997 | 0,599865863 | 0,15496377 | 3,87100707 | 0,00010839 | 0,0012348  | RHBDF1   |
| ENSGALG00000011488 | 1168,68478 | 0,598872747 | 0,17053454 | 3,51173862 | 0,00044519 | 0,00412506 | CMTM7    |
| ENSGALG00000016834 | 1257,10709 | 0,598292773 | 0,13769793 | 4,34496565 | 1,39E-05   | 0,00019982 | MCF2L    |
| ENSGALG00000009988 | 2544,44093 | 0,593615724 | 0,112456   | 5,27864872 | 1,30E-07   | 2,70E-06   | ELOVL1   |
| ENSGALG00000011548 | 2906,3811  | 0,593504022 | 0,11422522 | 5,19591069 | 2,04E-07   | 4,08E-06   | PPP1R13B |
| ENSGALG00000009755 | 3320,85237 | 0,592776412 | 0,10287504 | 5,76210162 | 8,31E-09   | 2,06E-07   | LRIG3    |
| ENSGALG00000002709 | 2623,11643 | 0,59270728  | 0,12665173 | 4,67981968 | 2,87E-06   | 4,75E-05   | MYO1C    |
| ENSGALG00000003642 | 1312,51148 | 0,590129639 | 0,16880923 | 3,49583753 | 0,00047258 | 0,0043244  | PDGF-A   |
| ENSGALG00000008615 | 1132,69776 | 0,588449543 | 0,17235789 | 3,41411434 | 0,0006399  | 0,00559753 |          |
| ENSGALG00000015096 | 745,308008 | 0,586609595 | 0,15533516 | 3,77641219 | 0,0001591  | 0,00171424 | SH3GL2   |
| ENSGALG00000011295 | 1419,82516 | 0,585889038 | 0,13140148 | 4,45877045 | 8,24E-06   | 0,00012483 | SOCS2    |
| ENSGALG00000014933 | 1201,23972 | 0,584450113 | 0,16167735 | 3,61491648 | 0,00030044 | 0,00298275 | HEXB     |
| ENSGALG00000012979 | 9491,84596 | 0,583725131 | 0,11596876 | 5,0334689  | 4,82E-07   | 9,19E-06   |          |
| ENSGALG00000001076 | 3535,03862 | 0,580936414 | 0,09643753 | 6,02396613 | 1,70E-09   | 4,70E-08   | LIMK1    |
| ENSGALG00000007242 | 1537,31241 | 0,576491214 | 0,1265805  | 4,55434468 | 5,25E-06   | 8,33E-05   | SLITRK4  |
| ENSGALG00000011045 | 4784,96919 | 0,574987094 | 0,09168796 | 6,27113007 | 3,58E-10   | 1,12E-08   |          |
| ENSGALG00000020479 | 3396,9575  | 0,574556644 | 0,12483475 | 4,60253786 | 4,17E-06   | 6,68E-05   |          |

|                    |            |             |            |            |            |            |          |
|--------------------|------------|-------------|------------|------------|------------|------------|----------|
| ENSGALG00000016276 | 897,324858 | 0,574168384 | 0,14748691 | 3,89301259 | 9,90E-05   | 0,00113831 | KHDRBS2  |
| ENSGALG00000012429 | 2058,77028 | 0,572869136 | 0,16484364 | 3,47522751 | 0,00051042 | 0,00461848 | BMP4     |
| ENSGALG00000019961 | 8549,80541 | 0,57282511  | 0,10454384 | 5,47928114 | 4,27E-08   | 9,70E-07   | SLC18B1  |
| ENSGALG00000009415 | 20919,8487 | 0,570748764 | 0,13417273 | 4,25383594 | 2,10E-05   | 0,00028634 | SMOC1    |
| ENSGALG00000011241 | 1131,08019 | 0,569997915 | 0,15948275 | 3,57404125 | 0,00035151 | 0,00340331 | RFTN1    |
| ENSGALG00000011708 | 16164,7225 | 0,569570289 | 0,12123193 | 4,69818723 | 2,62E-06   | 4,38E-05   | MYLK     |
| ENSGALG00000006340 | 2676,99994 | 0,569237942 | 0,12657684 | 4,49717295 | 6,89E-06   | 0,00010687 |          |
| ENSGALG00000009156 | 4770,93246 | 0,56553435  | 0,14428903 | 3,91945491 | 8,87E-05   | 0,00103754 | CDAN1    |
| ENSGALG00000012394 | 13820,7507 | 0,564570466 | 0,07862384 | 7,1806525  | 6,94E-13   | 3,00E-11   | NID2     |
| ENSGALG00000016350 | 2492,97331 | 0,563918458 | 0,11007286 | 5,12313797 | 3,00E-07   | 5,92E-06   | ARHGEF10 |
| ENSGALG00000008293 | 782,926286 | 0,562981441 | 0,15976711 | 3,52376315 | 0,00042546 | 0,00397768 | SH3PXD2A |
| ENSGALG00000006655 | 826,977917 | 0,562031156 | 0,15875615 | 3,54021654 | 0,0003998  | 0,00379131 | MAP3K13  |
| ENSGALG00000001664 | 2551,39665 | 0,561926589 | 0,13283895 | 4,23013411 | 2,34E-05   | 0,00031279 | PTPN9    |
| ENSGALG00000008621 | 9550,43432 | 0,561672993 | 0,11796857 | 4,76120892 | 1,92E-06   | 3,30E-05   | NRP2     |
| ENSGALG00000003122 | 1351,29404 | 0,561038511 | 0,1311515  | 4,27778952 | 1,89E-05   | 0,00026004 | ZFAND2A  |
| ENSGALG00000015858 | 3586,9625  | 0,559546334 | 0,10146313 | 5,51477519 | 3,49E-08   | 8,06E-07   | DOPEY1   |
| ENSGALG00000013768 | 1494,29229 | 0,55942652  | 0,16037363 | 3,48827007 | 0,00048616 | 0,00442998 | PHACTR2  |
| ENSGALG00000015862 | 11794,0676 | 0,559415098 | 0,12796473 | 4,37163513 | 1,23E-05   | 0,00017979 |          |
| ENSGALG00000027757 | 11293,5634 | 0,559044043 | 0,10878229 | 5,13910919 | 2,76E-07   | 5,46E-06   | ARL4A    |
| ENSGALG00000017462 | 3715,9454  | 0,558530219 | 0,09687426 | 5,76551735 | 8,14E-09   | 2,02E-07   | FNIP1    |
| ENSGALG00000000388 | 11929,068  | 0,558245728 | 0,14596937 | 3,82440333 | 0,00013109 | 0,00144858 | LIN28A   |
| ENSGALG00000007238 | 2073,56415 | 0,558183051 | 0,16989919 | 3,28537799 | 0,00101846 | 0,00826191 |          |
| ENSGALG00000012852 | 29056,4718 | 0,557720187 | 0,10036391 | 5,55697956 | 2,74E-08   | 6,41E-07   | MKRN1    |
| ENSGALG00000001163 | 1519,07571 | 0,557286192 | 0,12356604 | 4,51002717 | 6,48E-06   | 0,00010148 | NDEL1    |
| ENSGALG00000016480 | 9465,84299 | 0,557041155 | 0,0924977  | 6,02221656 | 1,72E-09   | 4,71E-08   | SDC1     |
| ENSGALG00000028291 | 14773,7601 | 0,555590355 | 0,1099194  | 5,05452513 | 4,31E-07   | 8,29E-06   |          |
| ENSGALG00000007845 | 1987,98275 | 0,553575037 | 0,11370336 | 4,86859011 | 1,12E-06   | 2,02E-05   | REL      |
| ENSGALG00000014084 | 5460,83517 | 0,552765103 | 0,13748262 | 4,02061798 | 5,80E-05   | 0,00070908 | FGFR1OP2 |
| ENSGALG00000009433 | 8016,67263 | 0,551628222 | 0,14479495 | 3,80972014 | 0,00013912 | 0,00152391 | BAG3     |
| ENSGALG00000000680 | 7215,7939  | 0,550999971 | 0,1233941  | 4,46536719 | 7,99E-06   | 0,0001212  |          |
| ENSGALG00000005433 | 1687,94239 | 0,550736363 | 0,11950908 | 4,60832215 | 4,06E-06   | 6,53E-05   |          |
| ENSGALG00000002461 | 9112,46886 | 0,549280944 | 0,12891627 | 4,2607573  | 2,04E-05   | 0,00027853 |          |
| ENSGALG00000007394 | 992,390556 | 0,546419843 | 0,14202976 | 3,84722077 | 0,00011947 | 0,00134267 |          |
| ENSGALG00000015215 | 5874,51018 | 0,543882262 | 0,10412914 | 5,22315125 | 1,76E-07   | 3,55E-06   | MAPRE2   |
| ENSGALG00000010164 | 6967,47145 | 0,542805965 | 0,08759539 | 6,19674117 | 5,76E-10   | 1,73E-08   | SMARCA2  |
| ENSGALG00000017365 | 2743,73739 | 0,541410874 | 0,12416381 | 4,36045628 | 1,30E-05   | 0,00018835 |          |
| ENSGALG00000014860 | 10032,8437 | 0,540418516 | 0,08281121 | 6,52591008 | 6,76E-11   | 2,25E-09   | YES1     |
| ENSGALG00000016781 | 15938,709  | 0,539823119 | 0,08390658 | 6,43362076 | 1,25E-10   | 4,08E-09   | MAP4K4   |
| ENSGALG00000016883 | 2972,3538  | 0,537559856 | 0,10976916 | 4,89718485 | 9,72E-07   | 1,77E-05   | DOCK9    |
| ENSGALG00000011449 | 1797,12078 | 0,537091274 | 0,13239866 | 4,05662179 | 4,98E-05   | 0,00062155 |          |
| ENSGALG00000009855 | 6709,81331 | 0,536813312 | 0,11427025 | 4,69775213 | 2,63E-06   | 4,38E-05   | TBC1D9   |
| ENSGALG00000017185 | 9572,81105 | 0,536156218 | 0,13194516 | 4,06347779 | 4,83E-05   | 0,00060477 | TMEM123  |
| ENSGALG00000013406 | 658,679579 | 0,533541915 | 0,16232604 | 3,28685351 | 0,00101314 | 0,00822408 | EOGT     |
| ENSGALG00000026237 | 8325,49172 | 0,532296374 | 0,09561992 | 5,56679355 | 2,59E-08   | 6,08E-07   |          |
| ENSGALG00000000669 | 4577,06628 | 0,531970586 | 0,10145026 | 5,24365914 | 1,57E-07   | 3,21E-06   | ETV3     |
| ENSGALG00000015792 | 1821,33594 | 0,531949092 | 0,12531887 | 4,24476438 | 2,19E-05   | 0,00029688 |          |
| ENSGALG00000000891 | 3401,91556 | 0,531658469 | 0,10937715 | 4,86078185 | 1,17E-06   | 2,10E-05   | NSUN5    |
| ENSGALG00000015112 | 8927,72556 | 0,528998124 | 0,10528495 | 5,02444216 | 5,05E-07   | 9,60E-06   |          |
| ENSGALG00000002471 | 3937,07792 | 0,528654759 | 0,11018735 | 4,79778103 | 1,60E-06   | 2,82E-05   |          |
| ENSGALG00000014834 | 2740,7337  | 0,527383014 | 0,1070106  | 4,92832478 | 8,29E-07   | 1,53E-05   | NCOA7    |
| ENSGALG00000027526 | 2310,64445 | 0,527340701 | 0,12420628 | 4,24568455 | 2,18E-05   | 0,00029599 | COL9A2   |
| ENSGALG00000017414 | 7193,90052 | 0,522128726 | 0,09330101 | 5,59617465 | 2,19E-08   | 5,19E-07   | JUP      |
| ENSGALG00000002759 | 2898,01396 | 0,520324255 | 0,1531807  | 3,39680035 | 0,00068179 | 0,00589798 | PEAK1    |
| ENSGALG00000015193 | 2485,09904 | 0,518302858 | 0,13474249 | 3,84661781 | 0,00011976 | 0,00134477 | CCDC80   |
| ENSGALG00000002583 | 881,320118 | 0,51810067  | 0,15491432 | 3,34443367 | 0,00082451 | 0,00697347 | PIK3CD   |
| ENSGALG00000006002 | 2311,21963 | 0,517539205 | 0,12381422 | 4,1799657  | 2,92E-05   | 0,00038309 | WHAMM    |
| ENSGALG00000011162 | 1743,64653 | 0,516837911 | 0,12166248 | 4,24812899 | 2,16E-05   | 0,00029341 | CYP46A1  |
| ENSGALG00000000761 | 2548,35828 | 0,511636934 | 0,11935769 | 4,28658551 | 1,81E-05   | 0,00025079 | TSKU     |
| ENSGALG00000008811 | 6319,41069 | 0,510104856 | 0,14038413 | 3,63363628 | 0,00027945 | 0,00279777 | SLC1A4   |
| ENSGALG00000007016 | 944,373297 | 0,509222424 | 0,14442833 | 3,52577944 | 0,00042224 | 0,00395936 | FAM169B  |
| ENSGALG00000003668 | 1606,5427  | 0,508101808 | 0,12448719 | 4,08155899 | 4,47E-05   | 0,00056127 |          |
| ENSGALG00000003948 | 4679,11028 | 0,503499536 | 0,09252751 | 5,44161999 | 5,28E-08   | 1,19E-06   | ALAS1    |

|                    |            |             |            |            |            |            |          |
|--------------------|------------|-------------|------------|------------|------------|------------|----------|
| ENSGALG00000015458 | 8275,30923 | 0,50234495  | 0,11154476 | 4,50352792 | 6,68E-06   | 0,00010424 | ILDR2    |
| ENSGALG00000006569 | 8235,42763 | 0,500306434 | 0,1289293  | 3,88047121 | 0,00010425 | 0,00119425 |          |
| ENSGALG00000012449 | 8575,6897  | 0,498545559 | 0,13392532 | 3,72256398 | 0,00019721 | 0,00206435 | MBD5     |
| ENSGALG00000004710 | 3763,43768 | 0,498075539 | 0,10011571 | 4,97499881 | 6,52E-07   | 1,22E-05   | TMOD3    |
| ENSGALG00000017388 | 6631,01193 | 0,49802444  | 0,09554361 | 5,21253541 | 1,86E-07   | 3,75E-06   |          |
| ENSGALG00000004909 | 2041,96193 | 0,497587671 | 0,13255196 | 3,75390642 | 0,0001741  | 0,00185173 |          |
| ENSGALG00000005095 | 2394,73163 | 0,496064325 | 0,13816886 | 3,59027581 | 0,00033033 | 0,00322566 | SLC25A25 |
| ENSGALG00000003770 | 2099,85738 | 0,492649703 | 0,12147281 | 4,05563753 | 5,00E-05   | 0,00062331 | ANXA2    |
| ENSGALG00000001007 | 23689,0314 | 0,492162491 | 0,08170528 | 6,0236317  | 1,71E-09   | 4,70E-08   |          |
| ENSGALG00000027925 | 2899,91937 | 0,491701601 | 0,15107329 | 3,25472237 | 0,00113503 | 0,0090607  |          |
| ENSGALG00000011054 | 3850,38645 | 0,491324799 | 0,13238005 | 3,71147149 | 0,00020606 | 0,00214725 |          |
| ENSGALG00000009503 | 5216,27727 | 0,49017284  | 0,10922838 | 4,48759608 | 7,20E-06   | 0,00011097 | RAB3GAP2 |
| ENSGALG00000000936 | 1155,34155 | 0,490067343 | 0,13552456 | 3,61607777 | 0,0002991  | 0,00297412 |          |
| ENSGALG00000011539 | 2399,98235 | 0,490040841 | 0,15085476 | 3,24842803 | 0,00116045 | 0,00921652 |          |
| ENSGALG00000016768 | 7017,45831 | 0,489550679 | 0,0912379  | 5,3656504  | 8,07E-08   | 1,73E-06   | LONRF2   |
| ENSGALG00000016839 | 2941,70522 | 0,488322587 | 0,14416141 | 3,38733229 | 0,00070576 | 0,00607593 |          |
| ENSGALG00000001962 | 47390,8257 | 0,488180846 | 0,07927072 | 6,15840034 | 7,35E-10   | 2,15E-08   | PTBP1    |
| ENSGALG00000008321 | 2140,81231 | 0,487472572 | 0,11701276 | 4,16597802 | 3,10E-05   | 0,00040481 | RNPEPL1  |
| ENSGALG00000026231 | 4317,60577 | 0,487086101 | 0,13624774 | 3,57500308 | 0,00035022 | 0,00339345 | ARID3A   |
| ENSGALG00000002316 | 5849,0452  | 0,486190455 | 0,10164247 | 4,78333983 | 1,72E-06   | 3,00E-05   | NUBP2    |
| ENSGALG00000005727 | 11457,1676 | 0,485528575 | 0,09017413 | 5,38434468 | 7,27E-08   | 1,58E-06   |          |
| ENSGALG00000013661 | 3653,88906 | 0,485373842 | 0,14009384 | 3,4646338  | 0,00053095 | 0,00476108 | MICU3    |
| ENSGALG00000006237 | 12165,443  | 0,48464383  | 0,09005848 | 5,38143497 | 7,39E-08   | 1,60E-06   | PKN2     |
| ENSGALG00000006121 | 10037,2715 | 0,483017989 | 0,10132916 | 4,76682134 | 1,87E-06   | 3,22E-05   | PIK3C2A  |
| ENSGALG00000003835 | 26017,6944 | 0,482616746 | 0,0853296  | 5,65591273 | 1,55E-08   | 3,75E-07   |          |
| ENSGALG00000002219 | 2154,95524 | 0,481514535 | 0,11726813 | 4,10609869 | 4,02E-05   | 0,00051051 | WBP2     |
| ENSGALG00000014719 | 2318,70089 | 0,480107075 | 0,11701682 | 4,10288958 | 4,08E-05   | 0,00051712 |          |
| ENSGALG00000007271 | 2336,70848 | 0,480045702 | 0,10812496 | 4,43973058 | 9,01E-06   | 0,00013558 |          |
| ENSGALG00000028128 | 2623,01722 | 0,475145623 | 0,1057506  | 4,49307716 | 7,02E-06   | 0,00010841 |          |
| ENSGALG00000002830 | 1989,1104  | 0,475072145 | 0,13713011 | 3,46438965 | 0,00053144 | 0,00476199 | NUDT3    |
| ENSGALG00000016283 | 1439,58733 | 0,474889919 | 0,14244125 | 3,33393539 | 0,00085627 | 0,00717416 | BEND6    |
| ENSGALG00000014953 | 9336,02158 | 0,474792932 | 0,1011178  | 4,69544373 | 2,66E-06   | 4,43E-05   | RWDD1    |
| ENSGALG00000014873 | 10464,2969 | 0,474224225 | 0,08830699 | 5,37017768 | 7,87E-08   | 1,69E-06   | GJA1     |
| ENSGALG00000008181 | 4533,21462 | 0,473531005 | 0,11780023 | 4,01978013 | 5,83E-05   | 0,00071091 | MADD     |
| ENSGALG00000009532 | 10930,7149 | 0,469457498 | 0,09307351 | 5,0439434  | 4,56E-07   | 8,72E-06   | GXYLT1   |
| ENSGALG00000009086 | 21565,5654 | 0,468835158 | 0,07859861 | 5,96492909 | 2,45E-09   | 6,53E-08   | EHD3     |
| ENSGALG00000016808 | 38690,2199 | 0,46860233  | 0,08636591 | 5,42577901 | 5,77E-08   | 1,28E-06   | RANBP2   |
| ENSGALG00000012033 | 1874,0337  | 0,467396297 | 0,12741413 | 3,66832386 | 0,00024415 | 0,00249111 | SGSM3    |
| ENSGALG00000005422 | 1476,40233 | 0,465795544 | 0,13673042 | 3,40667103 | 0,0006576  | 0,00570455 | PDLIM1   |
| ENSGALG00000000874 | 1565,53262 | 0,465401247 | 0,12194279 | 3,8165539  | 0,00013533 | 0,00148493 |          |
| ENSGALG00000003113 | 3657,12064 | 0,464288641 | 0,09568682 | 4,85216929 | 1,22E-06   | 2,19E-05   | RGS14    |
| ENSGALG00000002726 | 8476,00798 | 0,464112357 | 0,12109197 | 3,83272605 | 0,00012673 | 0,00140434 | KIF1B    |
| ENSGALG00000025747 | 1304,00667 | 0,463404585 | 0,13117609 | 3,5326909  | 0,00041135 | 0,00388056 | NQO2     |
| ENSGALG00000015036 | 6732,47434 | 0,461955249 | 0,11674428 | 3,95698403 | 7,59E-05   | 0,00090425 | RIC1     |
| ENSGALG00000016495 | 2231,85951 | 0,461211494 | 0,11447108 | 4,02906563 | 5,60E-05   | 0,00068541 | KLHL29   |
| ENSGALG00000000890 | 12926,8583 | 0,459656521 | 0,08135785 | 5,64981129 | 1,61E-08   | 3,87E-07   |          |
| ENSGALG00000004144 | 25688,7242 | 0,459129046 | 0,08737901 | 5,25445453 | 1,48E-07   | 3,05E-06   |          |
| ENSGALG00000009850 | 10767,8502 | 0,458569963 | 0,088576   | 5,17713554 | 2,25E-07   | 4,48E-06   | NOVA1    |
| ENSGALG00000014688 | 8715,47092 | 0,458090231 | 0,11541233 | 3,96916206 | 7,21E-05   | 0,00086337 | ZYX      |
| ENSGALG00000013480 | 4689,04979 | 0,457972294 | 0,11338344 | 4,03914621 | 5,36E-05   | 0,00066049 |          |
| ENSGALG00000015940 | 2526,66559 | 0,457737572 | 0,10654486 | 4,2961959  | 1,74E-05   | 0,00024177 |          |
| ENSGALG00000005134 | 3403,87437 | 0,45766228  | 0,10876996 | 4,20761648 | 2,58E-05   | 0,00034271 | ZSWIM8   |
| ENSGALG00000003295 | 2431,84104 | 0,455390197 | 0,14052    | 3,24075001 | 0,00119216 | 0,00942648 |          |
| ENSGALG00000011286 | 5006,91718 | 0,454714572 | 0,0910514  | 4,99404243 | 5,91E-07   | 1,12E-05   | UBE2E1   |
| ENSGALG00000010361 | 8260,44964 | 0,453176333 | 0,09954173 | 4,55262667 | 5,30E-06   | 8,39E-05   |          |
| ENSGALG00000012380 | 1446,14742 | 0,453021582 | 0,1253689  | 3,61350847 | 0,00030208 | 0,00299425 | SPOPL    |
| ENSGALG00000002672 | 3384,73075 | 0,451332604 | 0,11773512 | 3,83345767 | 0,00012635 | 0,00140246 |          |
| ENSGALG00000008521 | 14688,0623 | 0,447794364 | 0,09286454 | 4,82201686 | 1,42E-06   | 2,51E-05   |          |
| ENSGALG00000014371 | 4193,46245 | 0,447550868 | 0,10744176 | 4,16552078 | 3,11E-05   | 0,0004052  | LGALS8   |
| ENSGALG00000006947 | 14379,0645 | 0,446651103 | 0,08611381 | 5,18675352 | 2,14E-07   | 4,26E-06   | BDH1     |
| ENSGALG00000001596 | 11592,0471 | 0,445911724 | 0,08108031 | 5,49963016 | 3,81E-08   | 8,68E-07   | MLLT1    |
| ENSGALG00000016746 | 1667,79177 | 0,445777139 | 0,13374077 | 3,33314327 | 0,00085871 | 0,0071898  |          |

|                    |            |             |            |            |            |            |         |
|--------------------|------------|-------------|------------|------------|------------|------------|---------|
| ENSGALG00000006313 | 1456,17134 | 0,445448611 | 0,12850341 | 3,46643413 | 0,00052741 | 0,0047361  |         |
| ENSGALG00000003263 | 4582,86968 | 0,445240965 | 0,0980725  | 4,53991643 | 5,63E-06   | 8,89E-05   |         |
| ENSGALG00000009300 | 5731,29585 | 0,444814977 | 0,09141833 | 4,86570901 | 1,14E-06   | 2,05E-05   | NUMB    |
| ENSGALG00000003862 | 1841,95984 | 0,443615862 | 0,11893475 | 3,72990962 | 0,00019155 | 0,0020186  |         |
| ENSGALG00000005505 | 1365,18076 | 0,442779592 | 0,12653606 | 3,49923634 | 0,00046659 | 0,0042759  | PIK3CB  |
| ENSGALG00000005785 | 2692,43001 | 0,442398124 | 0,13426574 | 3,29494421 | 0,00098441 | 0,00803597 |         |
| ENSGALG00000004169 | 13236,4427 | 0,441293938 | 0,09199916 | 4,79671711 | 1,61E-06   | 2,83E-05   |         |
| ENSGALG00000012462 | 8197,06854 | 0,439936793 | 0,10637709 | 4,13563485 | 3,54E-05   | 0,00045554 | KIF5C   |
| ENSGALG00000012093 | 1956,24055 | 0,439445143 | 0,11904646 | 3,69137507 | 0,00022304 | 0,00230204 |         |
| ENSGALG00000001957 | 8367,03127 | 0,438219772 | 0,11967372 | 3,66178782 | 0,00025046 | 0,0025415  |         |
| ENSGALG00000012799 | 2784,84231 | 0,438081252 | 0,12516354 | 3,5000707  | 0,00046513 | 0,00426567 | RREB1   |
| ENSGALG00000013861 | 1114,81045 | 0,437973226 | 0,13471835 | 3,25102872 | 0,00114988 | 0,00916171 | TNFAIP3 |
| ENSGALG00000014419 | 9771,32739 | 0,437804845 | 0,11330954 | 3,86379513 | 0,00011164 | 0,00126494 |         |
| ENSGALG00000026184 | 2048,29159 | 0,437296545 | 0,12629201 | 3,4625829  | 0,00053502 | 0,00478722 |         |
| ENSGALG00000010030 | 8265,21081 | 0,435973553 | 0,09014275 | 4,83647923 | 1,32E-06   | 2,35E-05   |         |
| ENSGALG00000011464 | 75594,5083 | 0,435819807 | 0,08481234 | 5,13863704 | 2,77E-07   | 5,46E-06   | EIF5    |
| ENSGALG00000011643 | 21083,8275 | 0,435706974 | 0,11836787 | 3,68095649 | 0,00023236 | 0,00238441 | UTP20   |
| ENSGALG00000011016 | 2374,56332 | 0,434866192 | 0,12967523 | 3,35350229 | 0,00079796 | 0,00676722 | PGM1    |
| ENSGALG00000011707 | 2790,34805 | 0,43414341  | 0,11909866 | 3,64524173 | 0,00026714 | 0,00268407 |         |
| ENSGALG00000004089 | 7953,41422 | 0,433449007 | 0,08322806 | 5,20796739 | 1,91E-07   | 3,84E-06   |         |
| ENSGALG00000014686 | 1896,32829 | 0,43250268  | 0,11603822 | 3,72724338 | 0,00019359 | 0,00203322 | FBN2    |
| ENSGALG00000012414 | 1673,15959 | 0,431565773 | 0,12254766 | 3,52161578 | 0,00042893 | 0,00400704 | GNPNAT1 |
| ENSGALG00000009534 | 2593,70172 | 0,430698068 | 0,10888319 | 3,95559732 | 7,63E-05   | 0,00090864 |         |
| ENSGALG00000001376 | 6656,04949 | 0,43069552  | 0,08629025 | 4,99124172 | 6,00E-07   | 1,13E-05   | ARID3B  |
| ENSGALG00000016751 | 17995,0581 | 0,429916343 | 0,11291663 | 3,80737831 | 0,00014045 | 0,00153438 |         |
| ENSGALG00000007659 | 32471,1723 | 0,429907921 | 0,0785478  | 5,47320101 | 4,42E-08   | 1,00E-06   | HYOU1   |
| ENSGALG00000013134 | 6778,47765 | 0,429746745 | 0,09606485 | 4,47350681 | 7,69E-06   | 0,00011753 |         |
| ENSGALG00000010967 | 19058,4836 | 0,429437085 | 0,07951282 | 5,4008533  | 6,63E-08   | 1,45E-06   |         |
| ENSGALG00000000243 | 3939,58343 | 0,429169147 | 0,10346666 | 4,14789781 | 3,36E-05   | 0,0004354  | RDM1    |
| ENSGALG00000011682 | 2443,78682 | 0,428788464 | 0,10784939 | 3,97580809 | 7,01E-05   | 0,00084122 | CNOT4   |
| ENSGALG00000014784 | 3810,58741 | 0,427987842 | 0,11343575 | 3,77295391 | 0,00016133 | 0,00173519 | MAST4   |
| ENSGALG00000004638 | 3143,25207 | 0,427666392 | 0,1185082  | 3,60874933 | 0,00030768 | 0,00304007 |         |
| ENSGALG00000008128 | 9640,95815 | 0,426089907 | 0,09019502 | 4,72409566 | 2,31E-06   | 3,91E-05   |         |
| ENSGALG00000010975 | 6422,3758  | 0,425801788 | 0,09591443 | 4,43939214 | 9,02E-06   | 0,00013563 | TMTC2   |
| ENSGALG00000004184 | 14964,7344 | 0,42382749  | 0,07954333 | 5,32825936 | 9,92E-08   | 2,10E-06   | SPARC   |
| ENSGALG00000009298 | 10491,8514 | 0,42324599  | 0,12277761 | 3,44725699 | 0,00056631 | 0,00503123 | TNIK    |
| ENSGALG00000015033 | 5942,94152 | 0,422029877 | 0,11922305 | 3,5398347  | 0,00040038 | 0,00379131 | REV3L   |
| ENSGALG00000008009 | 4573,71765 | 0,421760643 | 0,09376655 | 4,49798603 | 6,86E-06   | 0,0001066  | BCAP29  |
| ENSGALG00000001546 | 5321,72397 | 0,420857037 | 0,11791501 | 3,56915579 | 0,00035813 | 0,00345138 | ZZEF1   |
| ENSGALG00000009570 | 4990,17008 | 0,419915848 | 0,09759573 | 4,30260451 | 1,69E-05   | 0,00023646 | ATP6V1D |
| ENSGALG00000011246 | 4677,48231 | 0,419525625 | 0,09763    | 4,29709732 | 1,73E-05   | 0,00024132 |         |
| ENSGALG00000015942 | 2654,62871 | 0,419245968 | 0,10972783 | 3,82078074 | 0,00013303 | 0,00146485 |         |
| ENSGALG00000004531 | 6608,4459  | 0,419189684 | 0,08983065 | 4,66644405 | 3,06E-06   | 5,03E-05   | PLOD1   |
| ENSGALG00000012251 | 1948,91488 | 0,417627661 | 0,12070121 | 3,46001212 | 0,00054015 | 0,00482625 |         |
| ENSGALG00000012739 | 5567,17218 | 0,417000863 | 0,09837079 | 4,23907217 | 2,24E-05   | 0,0003031  | HIVEP1  |
| ENSGALG00000020805 | 5785,80923 | 0,416086722 | 0,09259199 | 4,49376567 | 7,00E-06   | 0,0001082  | LRRC8D  |
| ENSGALG00000023806 | 3007,51007 | 0,415743003 | 0,11577931 | 3,59082288 | 0,00032964 | 0,00322241 |         |
| ENSGALG00000001443 | 21339,3728 | 0,41409085  | 0,11660287 | 3,5512922  | 0,00038334 | 0,00365771 |         |
| ENSGALG00000003181 | 2537,40381 | 0,412959133 | 0,11077844 | 3,72779349 | 0,00019316 | 0,00203049 | SURF2   |
| ENSGALG00000005723 | 2106,65447 | 0,412949734 | 0,1250895  | 3,3012343  | 0,0009626  | 0,00789588 |         |
| ENSGALG00000007141 | 2241,98683 | 0,412800257 | 0,11510085 | 3,58642238 | 0,00033525 | 0,00327113 | LRRK1   |
| ENSGALG00000005660 | 9409,08057 | 0,411134823 | 0,12248124 | 3,35671682 | 0,00078874 | 0,00669812 | NF1     |
| ENSGALG00000006863 | 4226,48137 | 0,410961417 | 0,09352764 | 4,39401049 | 1,11E-05   | 0,00016357 |         |
| ENSGALG00000005249 | 4537,35945 | 0,410952179 | 0,10151336 | 4,04825713 | 5,16E-05   | 0,00063971 | BICD2   |
| ENSGALG00000004644 | 3446,25125 | 0,409508513 | 0,12409834 | 3,2998709  | 0,00096729 | 0,00792395 |         |
| ENSGALG00000001194 | 18631,7262 | 0,408514612 | 0,08737937 | 4,67518369 | 2,94E-06   | 4,84E-05   |         |
| ENSGALG00000005962 | 14577,1851 | 0,407910696 | 0,09612843 | 4,24339276 | 2,20E-05   | 0,00029838 |         |
| ENSGALG00000028637 | 3638,50777 | 0,407745497 | 0,1057417  | 3,85605195 | 0,00011523 | 0,0013033  |         |
| ENSGALG00000005796 | 13049,6305 | 0,407045166 | 0,09023433 | 4,51097882 | 6,45E-06   | 0,00010115 | XBP1    |
| ENSGALG00000011254 | 1903,62474 | 0,406188469 | 0,11859058 | 3,42513271 | 0,0006145  | 0,00539801 | SATB1   |
| ENSGALG00000023451 | 10229,4738 | 0,405630741 | 0,10390284 | 3,90394266 | 9,46E-05   | 0,00109512 | TRPM7   |
| ENSGALG00000002399 | 3646,29569 | 0,405489945 | 0,09701983 | 4,17945444 | 2,92E-05   | 0,00038355 |         |

|                    |            |             |            |            |            |            |          |
|--------------------|------------|-------------|------------|------------|------------|------------|----------|
| ENSGALG00000012814 | 2642,59396 | 0,404889777 | 0,11881733 | 3,40766613 | 0,00065521 | 0,00569168 | PXDC1    |
| ENSGALG00000028267 | 14506,7903 | 0,403950335 | 0,07758347 | 5,2066546  | 1,92E-07   | 3,86E-06   |          |
| ENSGALG00000017085 | 3891,4285  | 0,403507696 | 0,11323732 | 3,56338096 | 0,00036611 | 0,00352281 | SLC7A1   |
| ENSGALG00000009748 | 12590,9107 | 0,403044512 | 0,10500934 | 3,83817788 | 0,00012395 | 0,001384   | ASNS     |
| ENSGALG00000010780 | 2934,00779 | 0,401358719 | 0,11055482 | 3,63040448 | 0,00028298 | 0,00282729 |          |
| ENSGALG00000014854 | 14435,0938 | 0,401311952 | 0,08622832 | 4,65406195 | 3,25E-06   | 5,33E-05   |          |
| ENSGALG00000011101 | 5371,2295  | 0,40109735  | 0,0891436  | 4,49945224 | 6,81E-06   | 0,00010613 | URB2     |
| ENSGALG00000008855 | 8350,52016 | 0,400902672 | 0,10842426 | 3,69753673 | 0,0002177  | 0,00225977 | UGP2     |
| ENSGALG00000026850 | 2047,38224 | 0,400065314 | 0,11989409 | 3,33682262 | 0,00084742 | 0,00711913 |          |
| ENSGALG00000013830 | 3806,14371 | 0,399422    | 0,11396388 | 3,50481227 | 0,00045693 | 0,00421349 | PRELID3A |
| ENSGALG00000015459 | 1707,50104 | 0,399319665 | 0,11963093 | 3,3379299  | 0,00084405 | 0,00709694 |          |
| ENSGALG00000005582 | 5939,79295 | 0,398284507 | 0,09131089 | 4,36185098 | 1,29E-05   | 0,00018737 | KLHL18   |
| ENSGALG00000008195 | 5223,77429 | 0,394418985 | 0,08931317 | 4,41613483 | 1,00E-05   | 0,00014928 | NPHP1    |
| ENSGALG00000012404 | 2166,93397 | 0,394285725 | 0,11188253 | 3,52410442 | 0,00042492 | 0,00397553 | ERO1A    |
| ENSGALG00000012342 | 4988,06672 | 0,391855224 | 0,11601632 | 3,37758709 | 0,00073125 | 0,00626949 | SASH1    |
| ENSGALG00000011542 | 3470,24914 | 0,391703901 | 0,11096577 | 3,52995262 | 0,00041563 | 0,00391209 |          |
| ENSGALG00000028203 | 5589,34557 | 0,39127665  | 0,10019534 | 3,90513811 | 9,42E-05   | 0,00109174 | SPRED1   |
| ENSGALG00000017283 | 2269,10202 | 0,390659364 | 0,1093337  | 3,57309192 | 0,00035279 | 0,00341304 | CCND2    |
| ENSGALG00000008676 | 3130,52664 | 0,390658638 | 0,11592196 | 3,37001398 | 0,00075164 | 0,00643113 | RRBP1    |
| ENSGALG00000002763 | 7822,98963 | 0,38996775  | 0,09784285 | 3,98565421 | 6,73E-05   | 0,00081175 | FRZB     |
| ENSGALG00000012280 | 4546,76644 | 0,388208613 | 0,09700097 | 4,0021108  | 6,28E-05   | 0,00075985 |          |
| ENSGALG00000014902 | 5801,5163  | 0,387988657 | 0,11314858 | 3,42901912 | 0,00060577 | 0,00534005 |          |
| ENSGALG00000016779 | 3110,09587 | 0,387851139 | 0,10566697 | 3,67050494 | 0,00024207 | 0,00247392 | RNF149   |
| ENSGALG00000026822 | 5680,41299 | 0,384087371 | 0,09933111 | 3,86673784 | 0,0001103  | 0,00125318 | WDR81    |
| ENSGALG00000008708 | 8378,00616 | 0,384060223 | 0,08161607 | 4,70569382 | 2,53E-06   | 4,24E-05   |          |
| ENSGALG00000004200 | 10300,1977 | 0,383702067 | 0,10034391 | 3,82386986 | 0,00013137 | 0,00145044 | DPP9     |
| ENSGALG00000019077 | 12866,6527 | 0,383662275 | 0,10944193 | 3,50562403 | 0,00045554 | 0,00420541 |          |
| ENSGALG00000008542 | 22218,9525 | 0,383345327 | 0,115816   | 3,3099513  | 0,00093312 | 0,00768428 | ADD3     |
| ENSGALG00000015765 | 12660,3185 | 0,383191974 | 0,11316078 | 3,38626134 | 0,00070852 | 0,0060955  |          |
| ENSGALG00000001551 | 13003,1544 | 0,382951597 | 0,10019028 | 3,82224294 | 0,00013224 | 0,00145747 | CCNL2    |
| ENSGALG00000012608 | 2396,75353 | 0,382010791 | 0,11550101 | 3,30742386 | 0,00094158 | 0,00774886 | DAPK1    |
| ENSGALG00000008520 | 50311,2923 | 0,381829873 | 0,07410654 | 5,15244531 | 2,57E-07   | 5,10E-06   | EIF4G1   |
| ENSGALG00000000464 | 4473,94851 | 0,378042232 | 0,09693774 | 3,89984576 | 9,63E-05   | 0,00111074 |          |
| ENSGALG00000013628 | 17850,2484 | 0,377744473 | 0,0965373  | 3,91293791 | 9,12E-05   | 0,00106213 | C6orf62  |
| ENSGALG00000004509 | 60307,8172 | 0,377502687 | 0,10213082 | 3,69626592 | 0,00021879 | 0,00226752 |          |
| ENSGALG00000000385 | 3155,8316  | 0,377133979 | 0,11668273 | 3,23213188 | 0,0012287  | 0,00967875 |          |
| ENSGALG00000008240 | 2335,47856 | 0,376593038 | 0,112924   | 3,33492474 | 0,00085322 | 0,00715348 | CFLAR    |
| ENSGALG00000016457 | 20077,635  | 0,37591995  | 0,08487595 | 4,42905171 | 9,46E-06   | 0,00014162 | TRIB2    |
| ENSGALG00000004002 | 12560,3704 | 0,375282513 | 0,09982845 | 3,75927432 | 0,00017041 | 0,00181569 | LYPLA2   |
| ENSGALG00000004384 | 6339,40502 | 0,37272222  | 0,09191076 | 4,05526203 | 5,01E-05   | 0,00062331 |          |
| ENSGALG00000014213 | 4846,8151  | 0,372421493 | 0,1124273  | 3,3125538  | 0,00092448 | 0,00763324 | PRR5     |
| ENSGALG00000017335 | 8042,45001 | 0,370836945 | 0,08378084 | 4,42627398 | 9,59E-06   | 0,00014329 |          |
| ENSGALG00000013605 | 5142,50116 | 0,369173077 | 0,09448513 | 3,90720816 | 9,34E-05   | 0,00108344 | LRRC16A  |
| ENSGALG00000009428 | 6757,25752 | 0,369028406 | 0,11310884 | 3,26259556 | 0,00110397 | 0,00886364 | SUSD6    |
| ENSGALG00000003180 | 15013,9328 | 0,367625634 | 0,08522459 | 4,31360964 | 1,61E-05   | 0,00022599 |          |
| ENSGALG00000008414 | 11352,9971 | 0,366746111 | 0,095194   | 3,85261804 | 0,00011686 | 0,00131933 | DVL3     |
| ENSGALG00000003748 | 6555,91118 | 0,36621302  | 0,08463061 | 4,32719328 | 1,51E-05   | 0,00021492 | ANO5     |
| ENSGALG00000006336 | 6628,48994 | 0,365567709 | 0,10726355 | 3,4081263  | 0,00065411 | 0,00569    |          |
| ENSGALG00000005845 | 8308,86511 | 0,364474801 | 0,09382855 | 3,88447647 | 0,00010255 | 0,00117581 | SLC7A5   |
| ENSGALG00000011288 | 4443,75245 | 0,36304574  | 0,0964958  | 3,76229586 | 0,00016836 | 0,00179695 | DACT2    |
| ENSGALG00000016736 | 21468,1233 | 0,362152411 | 0,10050997 | 3,60314896 | 0,00031439 | 0,00309657 | CYFIP1   |
| ENSGALG00000004696 | 6019,01081 | 0,360778491 | 0,09380179 | 3,84617901 | 0,00011997 | 0,00134597 | LEO1     |
| ENSGALG00000009562 | 5205,50613 | 0,359101036 | 0,11011889 | 3,26103035 | 0,00111008 | 0,00890653 |          |
| ENSGALG00000007145 | 42543,9665 | 0,358001987 | 0,07128079 | 5,02241869 | 5,10E-07   | 9,69E-06   | ITGB1    |
| ENSGALG00000023857 | 2295,50244 | 0,357227793 | 0,10931817 | 3,26778052 | 0,00108394 | 0,00871965 |          |
| ENSGALG00000010603 | 12138,5477 | 0,356862546 | 0,08271823 | 4,31419487 | 1,60E-05   | 0,00022565 |          |
| ENSGALG00000007514 | 7096,59375 | 0,355063614 | 0,08859236 | 4,00783581 | 6,13E-05   | 0,00074492 |          |
| ENSGALG00000003563 | 12215,1985 | 0,354826794 | 0,08437076 | 4,20556587 | 2,60E-05   | 0,0003451  | YARS     |
| ENSGALG00000009946 | 16182,3882 | 0,351940163 | 0,09459123 | 3,72064246 | 0,00019872 | 0,00207838 | HECTD1   |
| ENSGALG00000017112 | 5413,39298 | 0,351627272 | 0,10588126 | 3,32095857 | 0,00089709 | 0,00746122 | MTMR6    |
| ENSGALG00000005160 | 8835,93843 | 0,351320099 | 0,09529673 | 3,68659118 | 0,00022728 | 0,00234186 | VMP1     |
| ENSGALG00000002954 | 6375,29438 | 0,350618821 | 0,09690427 | 3,61819794 | 0,00029666 | 0,00295222 | MBTD1    |



|                     |            |             |            |            |            |            |          |
|---------------------|------------|-------------|------------|------------|------------|------------|----------|
| ENSGALG00000008099  | 7103,82231 | 0,350057141 | 0,08535874 | 4,10101087 | 4,11E-05   | 0,00052028 |          |
| ENSGALG00000005678  | 19719,4298 | 0,349721909 | 0,0904842  | 3,8650054  | 0,00011109 | 0,00125982 | FLNB     |
| ENSGALG000000014795 | 5131,9149  | 0,349663833 | 0,09082989 | 3,84965603 | 0,00011828 | 0,00133083 | TGIF1    |
| ENSGALG000000015013 | 15895,2683 | 0,348772486 | 0,09941333 | 3,50830713 | 0,00045097 | 0,00416629 | MSX1     |
| ENSGALG000000011047 | 7708,25037 | 0,346858574 | 0,09143673 | 3,79342699 | 0,00014858 | 0,00161338 | LEPROT   |
| ENSGALG000000001749 | 4850,90171 | 0,34679817  | 0,10645528 | 3,25768863 | 0,00112324 | 0,00897799 | ACSBG2   |
| ENSGALG000000015667 | 5950,72909 | 0,346421134 | 0,09935991 | 3,48652816 | 0,00048933 | 0,00445169 |          |
| ENSGALG000000003427 | 8942,13088 | 0,346212827 | 0,10652898 | 3,24994036 | 0,00115429 | 0,00918514 | USP3     |
| ENSGALG000000009540 | 6305,96328 | 0,344720194 | 0,10105941 | 3,41106481 | 0,0006471  | 0,00564079 | YAF2     |
| ENSGALG000000006437 | 3815,5669  | 0,344612756 | 0,0964691  | 3,57226061 | 0,00035391 | 0,00342125 |          |
| ENSGALG000000001003 | 4334,6017  | 0,344161191 | 0,10407482 | 3,30686318 | 0,00094347 | 0,00775418 | SEPN1    |
| ENSGALG000000028726 | 5513,31502 | 0,343861226 | 0,09087882 | 3,7837332  | 0,00015449 | 0,00167032 |          |
| ENSGALG000000014139 | 7333,64409 | 0,34378877  | 0,09116278 | 3,7711527  | 0,0001625  | 0,00174327 |          |
| ENSGALG000000007234 | 4391,88237 | 0,343143822 | 0,09912131 | 3,46185737 | 0,00053646 | 0,00479671 | CLCN5    |
| ENSGALG000000002521 | 2909,63624 | 0,341377701 | 0,10552536 | 3,23502994 | 0,0012163  | 0,00959312 |          |
| ENSGALG000000025884 | 6496,58774 | 0,339208538 | 0,0928033  | 3,65513456 | 0,00025705 | 0,00260356 | NABP1    |
| ENSGALG000000000546 | 3505,59123 | 0,338887883 | 0,09640887 | 3,51511115 | 0,00043957 | 0,00408392 |          |
| ENSGALG000000013677 | 5281,75302 | 0,33880019  | 0,09391468 | 3,60753163 | 0,00030912 | 0,00305196 |          |
| ENSGALG000000026349 | 30008,024  | 0,337656858 | 0,07971202 | 4,23595916 | 2,28E-05   | 0,00030611 |          |
| ENSGALG000000012202 | 7460,55254 | 0,337252452 | 0,08638462 | 3,90407991 | 9,46E-05   | 0,00109512 |          |
| ENSGALG000000010976 | 5122,33312 | 0,337203087 | 0,10038342 | 3,35915108 | 0,00078182 | 0,00665294 | CCDC126  |
| ENSGALG000000006417 | 9187,43681 | 0,336436699 | 0,08945097 | 3,76112978 | 0,00016915 | 0,00180381 | SEC24A   |
| ENSGALG000000006975 | 7222,31417 | 0,33439022  | 0,08487768 | 3,93967199 | 8,16E-05   | 0,00096378 |          |
| ENSGALG000000002362 | 7456,91772 | 0,333268709 | 0,08848366 | 3,76644362 | 0,00016559 | 0,00177191 | MANF     |
| ENSGALG000000014370 | 4742,98825 | 0,332141176 | 0,09950672 | 3,33787686 | 0,00084421 | 0,00709694 |          |
| ENSGALG000000003767 | 4420,56627 | 0,331888441 | 0,0963142  | 3,44589313 | 0,00056918 | 0,00504594 | NKD1     |
| ENSGALG000000006256 | 7680,29257 | 0,33180927  | 0,08270052 | 4,01217858 | 6,02E-05   | 0,00073206 |          |
| ENSGALG000000002548 | 7217,2063  | 0,330998688 | 0,08817899 | 3,75371385 | 0,00017423 | 0,00185173 | TLN1     |
| ENSGALG000000004691 | 5665,22107 | 0,330681288 | 0,10090233 | 3,27724134 | 0,00104827 | 0,00847626 |          |
| ENSGALG000000005139 | 48915,1737 | 0,327662098 | 0,07590851 | 4,31653954 | 1,58E-05   | 0,00022428 | CLTC     |
| ENSGALG000000011055 | 8298,54873 | 0,326999676 | 0,09831999 | 3,32587164 | 0,00088143 | 0,0073456  |          |
| ENSGALG000000016630 | 13012,9547 | 0,325439015 | 0,08809758 | 3,6940745  | 0,00022069 | 0,00228149 | EXTL3    |
| ENSGALG000000011630 | 13213,6043 | 0,324450144 | 0,08177951 | 3,96737719 | 7,27E-05   | 0,00086903 | GLI2     |
| ENSGALG000000015049 | 15025,2928 | 0,323309666 | 0,07842419 | 4,12257561 | 3,75E-05   | 0,00047969 |          |
| ENSGALG000000004132 | 40450,1788 | 0,317911072 | 0,09276067 | 3,42721839 | 0,0006098  | 0,00536425 |          |
| ENSGALG000000009448 | 18330,278  | 0,31659087  | 0,08894466 | 3,55941395 | 0,00037168 | 0,00356548 | IFRD1    |
| ENSGALG000000000258 | 23571,1755 | 0,314352619 | 0,08646657 | 3,63553944 | 0,0002774  | 0,00278044 |          |
| ENSGALG000000004063 | 4760,35876 | 0,313966155 | 0,0919727  | 3,41368847 | 0,0006409  | 0,00560237 | SLC25A14 |
| ENSGALG000000008315 | 6755,45974 | 0,312048416 | 0,08519158 | 3,66290207 | 0,00024937 | 0,00253574 |          |
| ENSGALG000000007241 | 5082,09102 | 0,311992362 | 0,09448776 | 3,30193399 | 0,00096021 | 0,00788138 | NUBP1    |
| ENSGALG000000009992 | 11411,8856 | 0,311546697 | 0,0854138  | 3,64749847 | 0,00026481 | 0,00266918 | ARHGAP5  |
| ENSGALG000000008837 | 13220,7097 | 0,311145069 | 0,0811437  | 3,83449427 | 0,00012582 | 0,0013978  | PELI1    |
| ENSGALG000000008265 | 23891,3346 | 0,310830618 | 0,08922654 | 3,48361172 | 0,0004947  | 0,00449394 |          |
| ENSGALG000000010084 | 23564,6118 | 0,310711961 | 0,07381728 | 4,20920342 | 2,56E-05   | 0,00034103 | EIF4G3   |
| ENSGALG000000011228 | 6953,04279 | 0,310544896 | 0,0872542  | 3,55908236 | 0,00037215 | 0,0035661  | WARS     |
| ENSGALG000000004938 | 5563,15704 | 0,309369487 | 0,09539583 | 3,24300846 | 0,00118275 | 0,00936984 |          |
| ENSGALG000000017111 | 14220,273  | 0,309121441 | 0,09000983 | 3,43430744 | 0,00059407 | 0,00525175 | NUP58    |
| ENSGALG000000006971 | 10261,5906 | 0,308524903 | 0,09239987 | 3,33901865 | 0,00084075 | 0,00708211 |          |
| ENSGALG000000003039 | 8205,74635 | 0,308092774 | 0,08797415 | 3,50208302 | 0,00046164 | 0,0042398  | SRM      |
| ENSGALG000000000346 | 4708,45419 | 0,306247189 | 0,08995671 | 3,40438422 | 0,00066313 | 0,00574456 |          |
| ENSGALG000000002863 | 20573,4084 | 0,306238468 | 0,09158034 | 3,34393231 | 0,000826   | 0,00697665 | ERGIC1   |
| ENSGALG000000003830 | 15302,2463 | 0,304702804 | 0,07866157 | 3,87359158 | 0,00010724 | 0,00122512 |          |
| ENSGALG000000021041 | 6232,92756 | 0,302815674 | 0,08606635 | 3,51839787 | 0,00043416 | 0,00404688 |          |
| ENSGALG000000005397 | 4086,38441 | 0,301881405 | 0,09352409 | 3,22784652 | 0,00124726 | 0,00980639 | GGNBP2   |
| ENSGALG000000010349 | 6576,00357 | 0,300633215 | 0,09122991 | 3,29533608 | 0,00098304 | 0,00803191 | POLR1C   |
| ENSGALG000000004295 | 16498,2044 | 0,300034342 | 0,08565811 | 3,50269613 | 0,00046057 | 0,00423316 | CPD      |
| ENSGALG000000007387 | 13168,5046 | 0,298075088 | 0,08883093 | 3,35553249 | 0,00079212 | 0,0067223  | GTF3C1   |
| ENSGALG000000011357 | 6177,88173 | 0,296426831 | 0,09147912 | 3,24037681 | 0,00119372 | 0,00943286 | VEZT     |
| ENSGALG000000010536 | 11637,7722 | 0,29615271  | 0,08796769 | 3,36660761 | 0,00076099 | 0,00649324 | FAF1     |
| ENSGALG000000011400 | 11997,2666 | 0,295706421 | 0,08251808 | 3,58353479 | 0,00033898 | 0,00330495 | USP44    |
| ENSGALG000000012138 | 28311,992  | 0,295412949 | 0,08299351 | 3,55947062 | 0,0003716  | 0,00356548 |          |
| ENSGALG000000002985 | 13749,5981 | 0,293105421 | 0,07993628 | 3,6667381  | 0,00024566 | 0,00250449 | UTP18    |

|                    |            |              |            |            |            |            |          |
|--------------------|------------|--------------|------------|------------|------------|------------|----------|
| ENSGALG00000003391 | 11311,3076 | 0,293097669  | 0,08152671 | 3,59511199 | 0,00032425 | 0,00317625 | EIF2AK1  |
| ENSGALG00000006856 | 8627,6039  | 0,290795459  | 0,08950457 | 3,2489453  | 0,00115834 | 0,00920562 | CD151    |
| ENSGALG00000006895 | 13236,4315 | 0,290027475  | 0,08022918 | 3,61498721 | 0,00030036 | 0,00298275 | CEP131   |
| ENSGALG00000026077 | 76281,091  | 0,289436865  | 0,08082386 | 3,58108204 | 0,00034217 | 0,00333353 | ALDOC    |
| ENSGALG00000004625 | 14027,7064 | 0,287002136  | 0,08764175 | 3,27471937 | 0,00105767 | 0,00854125 | ATXN2    |
| ENSGALG00000004098 | 13227,4006 | 0,28601688   | 0,0879168  | 3,25326778 | 0,00114086 | 0,00910141 | STK4     |
| ENSGALG00000005464 | 21720,0724 | 0,284610322  | 0,07882026 | 3,61087753 | 0,00030516 | 0,00301783 |          |
| ENSGALG00000016910 | 23116,5508 | 0,283615388  | 0,07814404 | 3,62939229 | 0,00028409 | 0,00283596 | RBM26    |
| ENSGALG00000015995 | 13978,5364 | 0,283340125  | 0,08204665 | 3,45340254 | 0,00055356 | 0,00494255 | PTPRA    |
| ENSGALG00000009325 | 20595,5323 | 0,276324484  | 0,08171116 | 3,38172254 | 0,00072033 | 0,00618434 |          |
| ENSGALG00000024094 | 16575,1537 | 0,274969008  | 0,08126295 | 3,38369463 | 0,00071517 | 0,00614658 | UBAP2L   |
| ENSGALG00000003339 | 10161,4212 | 0,27482717   | 0,08370391 | 3,28332526 | 0,0010259  | 0,00831154 | MTOR     |
| ENSGALG00000010481 | 11769,112  | 0,274549325  | 0,08028743 | 3,41958023 | 0,00062718 | 0,00549396 | CMPK1    |
| ENSGALG00000005243 | 13689,9827 | 0,272933583  | 0,07658125 | 3,56397392 | 0,00036528 | 0,00351756 | PPP3CB   |
| ENSGALG00000009782 | 45274,5885 | 0,272414043  | 0,08362168 | 3,25769643 | 0,0011232  | 0,00897799 | NAA15    |
| ENSGALG00000011596 | 8125,50614 | 0,272230864  | 0,08398232 | 3,24152578 | 0,00118892 | 0,00940681 |          |
| ENSGALG00000006935 | 12087,4137 | 0,270244925  | 0,0815817  | 3,31256806 | 0,00092444 | 0,00763324 |          |
| ENSGALG00000006564 | 13301,7317 | 0,268766276  | 0,07743018 | 3,47107908 | 0,00051837 | 0,00467506 |          |
| ENSGALG00000008348 | 63887,3158 | 0,267187928  | 0,07700129 | 3,46991508 | 0,00052062 | 0,00469198 | PDIA3    |
| ENSGALG00000003078 | 20092,3466 | 0,264245742  | 0,07691385 | 3,43560664 | 0,00059123 | 0,00523033 | MMD      |
| ENSGALG00000012137 | 17323,9143 | 0,256853565  | 0,07795662 | 3,29482705 | 0,00098482 | 0,00803597 | KTN1     |
| ENSGALG00000001364 | 18433,6359 | 0,254871955  | 0,07722743 | 3,30027759 | 0,00096589 | 0,00791766 | CSNK1A1  |
| ENSGALG00000010318 | 32908,0068 | 0,246411634  | 0,0714677  | 3,44787431 | 0,00056502 | 0,00502688 | TMED10   |
| ENSGALG00000002745 | 41084,1287 | 0,246172053  | 0,07133347 | 3,45100341 | 0,00055851 | 0,00497604 |          |
| ENSGALG00000005930 | 23930,3439 | -0,243448299 | 0,0744484  | -3,2700274 | 0,00107537 | 0,00867299 | PLS3     |
| ENSGALG00000020813 | 18469,9592 | -0,256523625 | 0,07948115 | -3,2274775 | 0,00124887 | 0,00980672 |          |
| ENSGALG00000026300 | 10090,9313 | -0,257041042 | 0,0792187  | -3,2447017 | 0,00117574 | 0,00932021 |          |
| ENSGALG00000000812 | 26499,6103 | -0,265852554 | 0,08212241 | -3,2372716 | 0,00120679 | 0,00952409 | OAZ1     |
| ENSGALG00000029037 | 7790,04361 | -0,270845781 | 0,08268109 | -3,2757889 | 0,00105367 | 0,00851447 |          |
| ENSGALG00000014756 | 8148,92025 | -0,271609614 | 0,08352364 | -3,2518892 | 0,00114641 | 0,00913984 | PPWD1    |
| ENSGALG00000002377 | 301877,116 | -0,272471138 | 0,0772308  | -3,5280112 | 0,00041869 | 0,00393497 | ENO1     |
| ENSGALG00000020003 | 18619,6916 | -0,275409017 | 0,07553559 | -3,6460829 | 0,00026627 | 0,0026796  | MAP3K4   |
| ENSGALG00000004048 | 24216,2179 | -0,278746659 | 0,07841685 | -3,554678  | 0,00037844 | 0,00361645 | PTPRS    |
| ENSGALG00000027963 | 8992,02102 | -0,279887477 | 0,08105728 | -3,4529592 | 0,00055447 | 0,00494715 | COX7C    |
| ENSGALG00000023546 | 8219,08438 | -0,280708865 | 0,08585195 | -3,2696854 | 0,00107667 | 0,00867661 |          |
| ENSGALG00000012618 | 8450,7599  | -0,282562019 | 0,08497947 | -3,325062  | 0,00088399 | 0,00736206 | FANCC    |
| ENSGALG00000010127 | 15511,214  | -0,2840371   | 0,08325403 | -3,4116921 | 0,00064561 | 0,00563262 | GLO1     |
| ENSGALG00000010829 | 19262,8491 | -0,284700815 | 0,07724408 | -3,68573   | 0,00022805 | 0,00234786 |          |
| ENSGALG00000014646 | 9607,01137 | -0,290131032 | 0,08710762 | -3,3307195 | 0,00086622 | 0,007243   | SYT11    |
| ENSGALG00000012185 | 5616,14478 | -0,291440425 | 0,08719363 | -3,342451  | 0,00083042 | 0,00699981 | PLA2G12A |
| ENSGALG00000011276 | 26271,7672 | -0,293405435 | 0,08969033 | -3,2713161 | 0,00107048 | 0,00863913 | BTG1     |
| ENSGALG00000012569 | 7527,80321 | -0,295102597 | 0,09077738 | -3,2508383 | 0,00115065 | 0,00916201 | FBXO7    |
| ENSGALG00000027710 | 10733,9814 | -0,296769112 | 0,08642619 | -3,4337868 | 0,00059521 | 0,00525813 |          |
| ENSGALG00000001026 | 8524,74214 | -0,297852025 | 0,08248786 | -3,6108589 | 0,00030518 | 0,00301783 |          |
| ENSGALG00000013837 | 12275,1858 | -0,300523253 | 0,08475438 | -3,5458138 | 0,0003914  | 0,00371758 |          |
| ENSGALG00000027695 | 6526,32859 | -0,301428682 | 0,09097649 | -3,3132592 | 0,00092215 | 0,00762408 | PCBP4    |
| ENSGALG00000004769 | 29935,7205 | -0,301514296 | 0,08604923 | -3,5039743 | 0,00045837 | 0,0042222  |          |
| ENSGALG00000015326 | 8955,0401  | -0,301560094 | 0,08584014 | -3,513043  | 0,00044301 | 0,0041079  | CLTA     |
| ENSGALG00000013207 | 7371,39959 | -0,304013471 | 0,09243698 | -3,2888729 | 0,00100589 | 0,00818655 | CTNNAL1  |
| ENSGALG00000006094 | 12757,9566 | -0,306148177 | 0,08654729 | -3,5373513 | 0,00040416 | 0,00382136 | PHF6     |
| ENSGALG00000012121 | 14730,7454 | -0,306219207 | 0,07698902 | -3,9774401 | 6,97E-05   | 0,00083828 | RCN1     |
| ENSGALG00000007127 | 7771,85476 | -0,307935097 | 0,08245774 | -3,7344594 | 0,00018812 | 0,00198413 |          |
| ENSGALG00000009559 | 5261,85996 | -0,308352593 | 0,09367103 | -3,2918672 | 0,00099525 | 0,00810516 |          |
| ENSGALG00000009474 | 18920,9808 | -0,308530687 | 0,08226101 | -3,7506307 | 0,00017639 | 0,0018683  |          |
| ENSGALG00000002040 | 12321,1382 | -0,309590748 | 0,08819991 | -3,5101026 | 0,00044793 | 0,00414132 |          |
| ENSGALG00000026981 | 16367,9889 | -0,309740111 | 0,09419663 | -3,2882293 | 0,0010082  | 0,00819996 | NHSL1    |
| ENSGALG00000006277 | 4802,8632  | -0,310824597 | 0,09438854 | -3,2930334 | 0,00099113 | 0,00807697 |          |
| ENSGALG00000012546 | 32458,4091 | -0,312592383 | 0,09413799 | -3,3205762 | 0,00089832 | 0,00746649 | MCM5     |
| ENSGALG00000003474 | 3939,39547 | -0,313391117 | 0,09428082 | -3,3240177 | 0,00088731 | 0,00738477 | MED20    |
| ENSGALG00000026437 | 4338,56055 | -0,314002706 | 0,09459663 | -3,3193857 | 0,00090216 | 0,00748844 |          |
| ENSGALG00000015712 | 7609,04078 | -0,314599398 | 0,08949622 | -3,5152257 | 0,00043938 | 0,00408392 | SLBP     |
| ENSGALG00000007131 | 72027,5204 | -0,31501454  | 0,08157254 | -3,8617718 | 0,00011257 | 0,00127431 |          |

|                    |            |              |            |            |            |            |          |
|--------------------|------------|--------------|------------|------------|------------|------------|----------|
| ENSGALG00000025764 | 4071,26079 | -0,316576106 | 0,096448   | -3,28235   | 0,00102946 | 0,00833494 | FKBP10   |
| ENSGALG00000007668 | 10342,6342 | -0,317701794 | 0,08996064 | -3,5315644 | 0,00041311 | 0,00389125 | BMP7     |
| ENSGALG00000001506 | 7912,15144 | -0,318173703 | 0,08732074 | -3,6437356 | 0,00026871 | 0,0026955  |          |
| ENSGALG00000006483 | 6631,82379 | -0,318521408 | 0,08620504 | -3,6949278 | 0,00021995 | 0,00227572 |          |
| ENSGALG00000023131 | 4044,89831 | -0,321300472 | 0,09495836 | -3,3835932 | 0,00071544 | 0,00614658 | PDXP     |
| ENSGALG00000013784 | 12402,0503 | -0,32170776  | 0,08351065 | -3,8522964 | 0,00011702 | 0,00131988 | CDT1     |
| ENSGALG00000021021 | 5260,37371 | -0,322180937 | 0,09166421 | -3,5147954 | 0,00044009 | 0,00408392 | ARL4C    |
| ENSGALG00000001475 | 99646,137  | -0,322303202 | 0,09596675 | -3,3584881 | 0,0007837  | 0,00666371 |          |
| ENSGALG00000016870 | 4880,45934 | -0,322919481 | 0,09246763 | -3,4922437 | 0,00047898 | 0,00437341 | TMTC4    |
| ENSGALG00000020528 | 5056,48494 | -0,323800436 | 0,09904607 | -3,2691901 | 0,00107856 | 0,00868191 | INIP     |
| ENSGALG00000007965 | 19359,9019 | -0,323830546 | 0,09621896 | -3,3655586 | 0,00076389 | 0,00650475 | HN1      |
| ENSGALG00000006780 | 12874,7901 | -0,325989737 | 0,10037051 | -3,2478639 | 0,00116275 | 0,00922895 |          |
| ENSGALG00000009362 | 9549,85526 | -0,327914914 | 0,09727937 | -3,3708577 | 0,00074935 | 0,00641585 |          |
| ENSGALG00000004621 | 10575,1137 | -0,328680536 | 0,09230808 | -3,5606907 | 0,00036988 | 0,00355364 | PREX1    |
| ENSGALG00000010758 | 4794,60081 | -0,329891138 | 0,08975382 | -3,6755107 | 0,00023737 | 0,00242988 |          |
| ENSGALG00000028470 | 4548,02852 | -0,330867645 | 0,09287432 | -3,5625312 | 0,0003673  | 0,00353152 |          |
| ENSGALG00000021365 | 6497,94756 | -0,33098251  | 0,0871271  | -3,7988467 | 0,00014537 | 0,00158263 | DCTN3    |
| ENSGALG00000017015 | 5143,28194 | -0,331426117 | 0,09201475 | -3,6018804 | 0,00031592 | 0,00310683 | RNASEH2B |
| ENSGALG00000007254 | 4308,53571 | -0,33313089  | 0,09410502 | -3,5399905 | 0,00040014 | 0,00379131 | ARHGAP12 |
| ENSGALG00000003429 | 14328,0151 | -0,333616807 | 0,0996214  | -3,3488469 | 0,00081149 | 0,00687711 | PBX1     |
| ENSGALG00000025818 | 7103,10421 | -0,334464872 | 0,08352702 | -4,0042717 | 6,22E-05   | 0,00075404 |          |
| ENSGALG00000002225 | 3236,66516 | -0,336939904 | 0,09933028 | -3,3921168 | 0,00069355 | 0,00597493 | RFFL     |
| ENSGALG00000008677 | 87282,2545 | -0,33704479  | 0,09556181 | -3,5269822 | 0,00042033 | 0,00394733 | VIM      |
| ENSGALG00000001567 | 14603,7017 | -0,337139369 | 0,08829903 | -3,8181548 | 0,00013445 | 0,00147663 |          |
| ENSGALG00000008438 | 5574,45982 | -0,337474785 | 0,10321767 | -3,2695448 | 0,00107721 | 0,00867661 | SLC35C1  |
| ENSGALG00000010745 | 57730,9692 | -0,33788407  | 0,10090108 | -3,3486665 | 0,00081201 | 0,00687711 | HMGB2    |
| ENSGALG00000005739 | 5611,79649 | -0,338102535 | 0,09729228 | -3,4751219 | 0,00051062 | 0,00461848 | SCD      |
| ENSGALG00000014496 | 5642,31406 | -0,339160901 | 0,09495091 | -3,5719606 | 0,00035432 | 0,00342253 | Prom1    |
| ENSGALG00000006539 | 5064,49097 | -0,340143008 | 0,09970044 | -3,41165   | 0,00064571 | 0,00563262 | C21orf2  |
| ENSGALG00000003930 | 5156,97026 | -0,340892203 | 0,10217013 | -3,3365153 | 0,00084836 | 0,00712222 | APBA2    |
| ENSGALG00000004581 | 6531,73175 | -0,341091866 | 0,08790547 | -3,8802119 | 0,00010437 | 0,00119443 | NDST1    |
| ENSGALG00000008525 | 5352,16855 | -0,34141534  | 0,09154577 | -3,7294496 | 0,0001919  | 0,00201889 | ABHD12   |
| ENSGALG00000010533 | 8438,68556 | -0,341487952 | 0,10389076 | -3,2869907 | 0,00101264 | 0,00822408 | ELAVL4   |
| ENSGALG00000010892 | 4569,599   | -0,341632417 | 0,09812504 | -3,481603  | 0,00049842 | 0,0045245  |          |
| ENSGALG00000016417 | 9617,73728 | -0,343209424 | 0,08745497 | -3,9244129 | 8,69E-05   | 0,00101926 |          |
| ENSGALG00000000684 | 3976,23685 | -0,343510226 | 0,09330701 | -3,681505  | 0,00023186 | 0,00238124 | KLHDC8A  |
| ENSGALG00000010444 | 2882,2778  | -0,345177441 | 0,10587293 | -3,2602994 | 0,00111295 | 0,00890713 |          |
| ENSGALG00000000231 | 17219,2246 | -0,345221534 | 0,08265368 | -4,1767231 | 2,96E-05   | 0,00038737 |          |
| ENSGALG00000010170 | 3503,64077 | -0,34648621  | 0,09982039 | -3,4710967 | 0,00051834 | 0,00467506 | INTU     |
| ENSGALG00000027648 | 7668,3666  | -0,347098945 | 0,08376328 | -4,1438078 | 3,42E-05   | 0,00044142 |          |
| ENSGALG00000008758 | 4589,06242 | -0,348320506 | 0,0918692  | -3,791483  | 0,00014975 | 0,00162325 |          |
| ENSGALG00000010674 | 11516,7147 | -0,348433039 | 0,07775009 | -4,4814487 | 7,41E-06   | 0,00011379 | DCTD     |
| ENSGALG00000020956 | 5772,71418 | -0,348683982 | 0,0891113  | -3,9129044 | 9,12E-05   | 0,00106213 |          |
| ENSGALG00000016034 | 14272,6354 | -0,349640251 | 0,08038023 | -4,3498288 | 1,36E-05   | 0,00019567 | ATRN     |
| ENSGALG00000005961 | 8289,71197 | -0,349909098 | 0,10219515 | -3,4239306 | 0,00061722 | 0,00541814 | dAK      |
| ENSGALG00000001733 | 12421,7814 | -0,350339549 | 0,08564084 | -4,0907999 | 4,30E-05   | 0,00054208 | LRIG2    |
| ENSGALG00000014262 | 6153,36709 | -0,35183883  | 0,09238387 | -3,8084442 | 0,00013984 | 0,00152929 | APBB2    |
| ENSGALG00000014970 | 12546,5116 | -0,352181226 | 0,08624907 | -4,0833047 | 4,44E-05   | 0,00055763 | FSTL1    |
| ENSGALG00000009670 | 3220,19002 | -0,352936897 | 0,10843055 | -3,254958  | 0,00113409 | 0,00905897 | SGCE     |
| ENSGALG00000001329 | 7348,8892  | -0,35438055  | 0,08566964 | -4,1365943 | 3,52E-05   | 0,00045411 | EPB41    |
| ENSGALG00000001604 | 6686,31029 | -0,355709643 | 0,09818594 | -3,6228163 | 0,00029141 | 0,00290229 |          |
| ENSGALG00000000921 | 4280,88802 | -0,356222635 | 0,09720598 | -3,6646163 | 0,00024771 | 0,00252329 |          |
| ENSGALG00000013672 | 6274,94537 | -0,356442405 | 0,09450669 | -3,7716103 | 0,0001622  | 0,00174157 | TSHZ1    |
| ENSGALG00000006634 | 43306,474  | -0,358696121 | 0,07111068 | -5,0441945 | 4,55E-07   | 8,72E-06   |          |
| ENSGALG00000022891 | 4638,29282 | -0,359408325 | 0,09123912 | -3,9391911 | 8,18E-05   | 0,00096481 |          |
| ENSGALG00000006887 | 5925,3009  | -0,35954959  | 0,08731049 | -4,1180572 | 3,82E-05   | 0,00048789 | FAM174B  |
| ENSGALG00000017329 | 3279,3596  | -0,359975454 | 0,1052627  | -3,4197818 | 0,00062671 | 0,00549374 | FCHSD2   |
| ENSGALG00000009650 | 11565,6296 | -0,362142597 | 0,07848435 | -4,6142011 | 3,95E-06   | 6,39E-05   |          |
| ENSGALG00000007128 | 21899,2708 | -0,362594465 | 0,07501963 | -4,8333277 | 1,34E-06   | 2,38E-05   | SH3BGRL  |
| ENSGALG00000004954 | 30674,7809 | -0,365189206 | 0,0801208  | -4,5579828 | 5,16E-06   | 8,21E-05   |          |
| ENSGALG00000012395 | 9821,77442 | -0,367131435 | 0,08321753 | -4,4117079 | 1,03E-05   | 0,00015182 | PLEKHG1  |
| ENSGALG00000014749 | 4798,93922 | -0,36753325  | 0,09967341 | -3,6873752 | 0,00022658 | 0,00233659 | EPHB6    |

|                    |            |              |            |            |            |            |          |
|--------------------|------------|--------------|------------|------------|------------|------------|----------|
| ENSGALG00000011078 | 7107,44613 | -0,368557879 | 0,09522589 | -3,8703537 | 0,00010868 | 0,00123699 |          |
| ENSGALG00000021340 | 9694,86728 | -0,368750238 | 0,08310139 | -4,4373533 | 9,11E-06   | 0,0001366  | CA9      |
| ENSGALG00000016390 | 3066,76348 | -0,369515643 | 0,106671   | -3,4640683 | 0,00053207 | 0,00476427 |          |
| ENSGALG00000015444 | 4115,05377 | -0,370185453 | 0,10012196 | -3,6973451 | 0,00021787 | 0,00225977 |          |
| ENSGALG00000012130 | 2125,48893 | -0,373712161 | 0,11059162 | -3,3792088 | 0,00072695 | 0,00623689 | DNAJC24  |
| ENSGALG00000014033 | 4259,25139 | -0,375904723 | 0,10689108 | -3,516708  | 0,00043693 | 0,00406667 |          |
| ENSGALG00000021653 | 5151,69547 | -0,375983807 | 0,10509679 | -3,5775006 | 0,0003469  | 0,00337293 | IFT22    |
| ENSGALG00000002940 | 2775,52872 | -0,376363633 | 0,10520586 | -3,5774017 | 0,00034703 | 0,00337293 |          |
| ENSGALG00000006886 | 5794,91901 | -0,376920608 | 0,10869717 | -3,4676213 | 0,00052509 | 0,00471861 | DACH2    |
| ENSGALG00000022603 | 14106,8838 | -0,378152541 | 0,07662552 | -4,9350734 | 8,01E-07   | 1,48E-05   |          |
| ENSGALG00000026081 | 3245,15307 | -0,379250879 | 0,10385941 | -3,6515795 | 0,00026063 | 0,00263136 | RBM38    |
| ENSGALG00000015469 | 2385,73691 | -0,382238702 | 0,11262796 | -3,393817  | 0,00068926 | 0,00595026 |          |
| ENSGALG00000014094 | 3273,18619 | -0,382585394 | 0,11483546 | -3,3315964 | 0,00086349 | 0,00722505 | STK38L   |
| ENSGALG00000006702 | 2276,02955 | -0,38370743  | 0,11242363 | -3,4130498 | 0,0006424  | 0,0056116  | MFG E8   |
| ENSGALG00000027472 | 3563,95993 | -0,383715502 | 0,11493616 | -3,3385097 | 0,00084229 | 0,00709032 | TMEM38B  |
| ENSGALG00000026313 | 6897,17922 | -0,38698684  | 0,11169382 | -3,4647111 | 0,0005308  | 0,00476108 | RND3     |
| ENSGALG00000024047 | 8317,97675 | -0,387381439 | 0,09008061 | -4,3003863 | 1,71E-05   | 0,00023803 | MYCL     |
| ENSGALG00000002249 | 11964,7275 | -0,388441944 | 0,08418985 | -4,6138809 | 3,95E-06   | 6,39E-05   | AGO1     |
| ENSGALG00000002056 | 4578,49374 | -0,389501294 | 0,10629829 | -3,6642291 | 0,00024808 | 0,00252505 | TANGO2   |
| ENSGALG00000014662 | 2243,29    | -0,390476627 | 0,1184381  | -3,2968836 | 0,00097764 | 0,00799823 | RBP5     |
| ENSGALG00000015663 | 9711,19793 | -0,390574583 | 0,09832214 | -3,9723971 | 7,12E-05   | 0,00085254 | HSDL2    |
| ENSGALG00000016148 | 7859,64044 | -0,391482924 | 0,08589693 | -4,557589  | 5,17E-06   | 8,21E-05   | C2CD2    |
| ENSGALG00000006606 | 1856,635   | -0,392475054 | 0,11686619 | -3,3583285 | 0,00078415 | 0,00666371 |          |
| ENSGALG00000002599 | 2253,34485 | -0,392633405 | 0,11309679 | -3,4716581 | 0,00051725 | 0,00467172 | ARHGEF39 |
| ENSGALG00000015702 | 9863,18717 | -0,39306292  | 0,08831382 | -4,4507519 | 8,56E-06   | 0,00012928 |          |
| ENSGALG00000005214 | 1715,18636 | -0,394482457 | 0,11892754 | -3,3169983 | 0,0009099  | 0,00754772 |          |
| ENSGALG00000003135 | 8376,23704 | -0,395749835 | 0,09573043 | -4,1340026 | 3,56E-05   | 0,00045832 | ANK3     |
| ENSGALG00000014753 | 5047,55497 | -0,396666478 | 0,09075263 | -4,3708537 | 1,24E-05   | 0,00018023 | CENPK    |
| ENSGALG00000003457 | 2509,63115 | -0,397746039 | 0,12188792 | -3,2632112 | 0,00110157 | 0,00885009 | CNP      |
| ENSGALG00000009354 | 2023,12355 | -0,398534666 | 0,12361626 | -3,2239664 | 0,00126428 | 0,00992152 |          |
| ENSGALG00000013067 | 7763,34164 | -0,398595631 | 0,09019442 | -4,4192935 | 9,90E-06   | 0,00014729 |          |
| ENSGALG00000026203 | 4347,01953 | -0,401070002 | 0,09158837 | -4,3790496 | 1,19E-05   | 0,00017419 | FAM174A  |
| ENSGALG00000008425 | 3562,16922 | -0,404601902 | 0,10623889 | -3,8084161 | 0,00013986 | 0,00152929 |          |
| ENSGALG00000012936 | 10559,4624 | -0,405432395 | 0,11906246 | -3,4052077 | 0,00066114 | 0,00573123 |          |
| ENSGALG00000028567 | 2180,82431 | -0,405726705 | 0,11524199 | -3,52065   | 0,00043049 | 0,00401866 | MYL9     |
| ENSGALG00000012796 | 9183,72656 | -0,406079242 | 0,08854404 | -4,5861839 | 4,51E-06   | 7,22E-05   | KIAA1549 |
| ENSGALG00000014648 | 2054,34955 | -0,406366184 | 0,11901606 | -3,4143811 | 0,00063927 | 0,00559597 | CETN3    |
| ENSGALG00000016497 | 4692,83115 | -0,407107351 | 0,09447725 | -4,3090517 | 1,64E-05   | 0,00022992 | UBXN2A   |
| ENSGALG00000012361 | 12035,1023 | -0,409904876 | 0,11706425 | -3,5015377 | 0,00046258 | 0,00424536 | NIN      |
| ENSGALG00000015109 | 6799,6685  | -0,409909583 | 0,09218338 | -4,4466758 | 8,72E-06   | 0,00013143 |          |
| ENSGALG00000015386 | 2068,30084 | -0,41009329  | 0,11802543 | -3,4746181 | 0,00051158 | 0,00462382 | RNF170   |
| ENSGALG00000026870 | 1831,07326 | -0,410373931 | 0,12408835 | -3,3071109 | 0,00094264 | 0,00775242 |          |
| ENSGALG00000006158 | 8974,72855 | -0,410915864 | 0,08502916 | -4,8326464 | 1,35E-06   | 2,38E-05   | ACVR2B   |
| ENSGALG00000016152 | 6212,20219 | -0,412571324 | 0,0962395  | -4,286923  | 1,81E-05   | 0,00025069 |          |
| ENSGALG00000015713 | 7773,18487 | -0,41471478  | 0,09908023 | -4,1856459 | 2,84E-05   | 0,00037482 | FAM53A   |
| ENSGALG00000012082 | 1953,58525 | -0,41500134  | 0,1210386  | -3,4286694 | 0,00060655 | 0,00534317 | FAIM     |
| ENSGALG00000011778 | 2303,47072 | -0,415058611 | 0,12790911 | -3,2449496 | 0,00117471 | 0,00931801 |          |
| ENSGALG00000013370 | 2831,43254 | -0,415383566 | 0,10536475 | -3,942339  | 8,07E-05   | 0,00095493 |          |
| ENSGALG00000014004 | 7899,02977 | -0,415462509 | 0,09272364 | -4,4806538 | 7,44E-06   | 0,00011394 |          |
| ENSGALG00000007304 | 5003,8857  | -0,415655575 | 0,09074301 | -4,5805797 | 4,64E-06   | 7,41E-05   |          |
| ENSGALG00000008152 | 3837,90866 | -0,415829645 | 0,10117889 | -4,1098461 | 3,96E-05   | 0,0005028  |          |
| ENSGALG00000002831 | 3577,75168 | -0,41600984  | 0,10574326 | -3,9341499 | 8,35E-05   | 0,0009825  | SH3PXD2B |
| ENSGALG00000011238 | 44015,5054 | -0,417063936 | 0,07670305 | -5,4373842 | 5,41E-08   | 1,21E-06   | WLS      |
| ENSGALG00000027897 | 2595,29874 | -0,417252062 | 0,11571548 | -3,6058448 | 0,00031114 | 0,00306943 | DTX1     |
| ENSGALG00000006172 | 1892,0827  | -0,41758713  | 0,11598879 | -3,600237  | 0,00031793 | 0,00312163 | ABCC8    |
| ENSGALG00000011558 | 4354,80067 | -0,418200744 | 0,11988928 | -3,4882246 | 0,00048624 | 0,00442998 |          |
| ENSGALG00000021616 | 42268,4535 | -0,419663237 | 0,0886351  | -4,7347298 | 2,19E-06   | 3,72E-05   |          |
| ENSGALG00000008873 | 22196,3678 | -0,419829297 | 0,09887727 | -4,2459637 | 2,18E-05   | 0,00029594 | POLE3    |
| ENSGALG00000013002 | 2566,67672 | -0,420522444 | 0,10532109 | -3,9927659 | 6,53E-05   | 0,00078854 | DAP1     |
| ENSGALG00000000713 | 13614,4975 | -0,421676085 | 0,08952353 | -4,7102262 | 2,47E-06   | 4,15E-05   | ZFH X3   |
| ENSGALG00000002484 | 4308,16241 | -0,423017499 | 0,1016587  | -4,1611539 | 3,17E-05   | 0,00041259 | CRYM     |
| ENSGALG00000026085 | 4035,50855 | -0,424635504 | 0,0949709  | -4,4712169 | 7,78E-06   | 0,0001185  |          |

|                    |            |              |            |            |            |            |          |
|--------------------|------------|--------------|------------|------------|------------|------------|----------|
| ENSGALG00000005237 | 13631,0034 | -0,426583983 | 0,07933189 | -5,3772069 | 7,57E-08   | 1,64E-06   | FGD3     |
| ENSGALG00000000966 | 3098,3696  | -0,42899963  | 0,11454974 | -3,7450949 | 0,00018033 | 0,00190837 |          |
| ENSGALG00000003742 | 3986,83364 | -0,429013967 | 0,10607378 | -4,0444865 | 5,24E-05   | 0,00064817 | CPAMD8   |
| ENSGALG00000014903 | 2320,30966 | -0,429814699 | 0,12033773 | -3,5717369 | 0,00035462 | 0,00342281 | ITGA2    |
| ENSGALG00000010346 | 4336,77039 | -0,430819834 | 0,09585982 | -4,4942692 | 6,98E-06   | 0,00010807 | TGFB3    |
| ENSGALG00000003602 | 3515,61032 | -0,430901727 | 0,11141807 | -3,8674312 | 0,00010999 | 0,00125076 |          |
| ENSGALG00000005330 | 1520,22623 | -0,431988153 | 0,12387209 | -3,4873727 | 0,00048779 | 0,00444089 | SNCAIP   |
| ENSGALG00000010158 | 10233,5261 | -0,433584905 | 0,07981872 | -5,4321205 | 5,57E-08   | 1,25E-06   | KANK1    |
| ENSGALG00000016328 | 3476,01841 | -0,434072431 | 0,12020068 | -3,6112311 | 0,00030475 | 0,00301783 |          |
| ENSGALG00000026113 | 3962,92871 | -0,434078932 | 0,09966992 | -4,355165  | 1,33E-05   | 0,00019229 |          |
| ENSGALG00000017334 | 2609,2748  | -0,435842486 | 0,12736757 | -3,4219266 | 0,00062179 | 0,00545441 |          |
| ENSGALG00000009212 | 1797,44087 | -0,438467006 | 0,1197104  | -3,6627312 | 0,00024954 | 0,00253574 | MND1     |
| ENSGALG00000017321 | 1548,21324 | -0,438859423 | 0,12937108 | -3,3922529 | 0,0006932  | 0,00597493 | PLEKHB1  |
| ENSGALG00000000362 | 6059,70576 | -0,440564998 | 0,08939063 | -4,9285366 | 8,28E-07   | 1,53E-05   |          |
| ENSGALG00000015368 | 4121,06739 | -0,441174377 | 0,09460983 | -4,6630922 | 3,11E-06   | 5,11E-05   | TMEM175  |
| ENSGALG00000016200 | 8447,45569 | -0,442373266 | 0,1201603  | -3,6815259 | 0,00023184 | 0,00238124 |          |
| ENSGALG00000021285 | 5699,38195 | -0,442446231 | 0,11153099 | -3,967025  | 7,28E-05   | 0,00086948 |          |
| ENSGALG00000006950 | 4791,25164 | -0,44318092  | 0,09921158 | -4,467028  | 7,93E-06   | 0,00012055 | LIMK2    |
| ENSGALG00000009516 | 4808,75075 | -0,444515061 | 0,09185634 | -4,8392421 | 1,30E-06   | 2,32E-05   |          |
| ENSGALG00000013754 | 4623,32074 | -0,444800112 | 0,10725118 | -4,1472749 | 3,36E-05   | 0,00043614 |          |
| ENSGALG00000012158 | 18186,212  | -0,44560696  | 0,08214388 | -5,4247128 | 5,80E-08   | 1,29E-06   |          |
| ENSGALG00000008700 | 14557,9866 | -0,447098587 | 0,09405696 | -4,7534873 | 2,00E-06   | 3,42E-05   | PDCD4    |
| ENSGALG00000024120 | 15628,5446 | -0,448054591 | 0,0899222  | -4,9826915 | 6,27E-07   | 1,18E-05   |          |
| ENSGALG00000029174 | 2839,91825 | -0,450699904 | 0,12705495 | -3,5472832 | 0,00038923 | 0,00369972 |          |
| ENSGALG00000010971 | 1510,70666 | -0,45100601  | 0,13003884 | -3,4682407 | 0,00052388 | 0,00471113 | CSRNP3   |
| ENSGALG00000019987 | 7452,0282  | -0,451061537 | 0,11200004 | -4,0273338 | 5,64E-05   | 0,0006898  | LRP11    |
| ENSGALG00000000970 | 6965,54674 | -0,451525139 | 0,09506462 | -4,7496653 | 2,04E-06   | 3,48E-05   |          |
| ENSGALG00000008136 | 1284,16167 | -0,451819148 | 0,13252856 | -3,409221  | 0,00065149 | 0,0056751  | C2orf69  |
| ENSGALG00000007839 | 50053,4791 | -0,453579178 | 0,09430846 | -4,8095279 | 1,51E-06   | 2,66E-05   | NCAM1    |
| ENSGALG00000000628 | 9521,22366 | -0,454003443 | 0,10552649 | -4,3022698 | 1,69E-05   | 0,00023655 |          |
| ENSGALG00000025915 | 4915,79448 | -0,454200002 | 0,12936551 | -3,5109822 | 0,00044645 | 0,00413069 | ARRDC3   |
| ENSGALG00000015537 | 3136,68818 | -0,459457432 | 0,12608507 | -3,6440272 | 0,00026841 | 0,00269461 | MAN2B2   |
| ENSGALG00000006036 | 5865,93911 | -0,461900797 | 0,11016505 | -4,1928072 | 2,76E-05   | 0,00036394 |          |
| ENSGALG00000010705 | 6215,71804 | -0,462215381 | 0,14311354 | -3,2297111 | 0,00123915 | 0,00975492 | ZBTB18   |
| ENSGALG00000022926 | 4103,57352 | -0,463163963 | 0,11247396 | -4,117966  | 3,82E-05   | 0,00048789 | GPR162   |
| ENSGALG00000006982 | 2095,88213 | -0,463202789 | 0,13888123 | -3,335244  | 0,00085225 | 0,00715006 |          |
| ENSGALG00000009064 | 6911,57971 | -0,463588885 | 0,0867529  | -5,3437857 | 9,10E-08   | 1,93E-06   | FZD1     |
| ENSGALG00000000939 | 13136,3898 | -0,464735788 | 0,11044249 | -4,2079439 | 2,58E-05   | 0,00034257 |          |
| ENSGALG00000003595 | 2171,0558  | -0,465858104 | 0,11751231 | -3,9643346 | 7,36E-05   | 0,00087851 | SARM1    |
| ENSGALG00000017119 | 2363,66079 | -0,467363832 | 0,11628448 | -4,0191421 | 5,84E-05   | 0,00071214 | TNFRSF19 |
| ENSGALG00000004598 | 1493,7651  | -0,468100334 | 0,1412582  | -3,3137923 | 0,0009204  | 0,00761459 | CUX2     |
| ENSGALG00000009475 | 10491,2397 | -0,469402079 | 0,09789746 | -4,7948339 | 1,63E-06   | 2,85E-05   |          |
| ENSGALG00000006885 | 5604,36422 | -0,469804206 | 0,10737161 | -4,3754975 | 1,21E-05   | 0,00017684 |          |
| ENSGALG00000010422 | 4706,76498 | -0,470203966 | 0,12428621 | -3,7832354 | 0,0001548  | 0,00167222 |          |
| ENSGALG00000007710 | 2351,67196 | -0,471105348 | 0,10711222 | -4,3982409 | 1,09E-05   | 0,00016079 |          |
| ENSGALG00000027373 | 14650,434  | -0,47216803  | 0,10227634 | -4,616591  | 3,90E-06   | 6,33E-05   |          |
| ENSGALG00000001774 | 34212,4119 | -0,47258081  | 0,07718637 | -6,1225938 | 9,21E-10   | 2,65E-08   | NEO1     |
| ENSGALG00000015107 | 1553,32125 | -0,4734568   | 0,1315676  | -3,598582  | 0,00031996 | 0,00313663 | PIP5K1B  |
| ENSGALG00000012658 | 1659,97017 | -0,475116315 | 0,12664668 | -3,7515101 | 0,00017577 | 0,00186492 | TCP11L2  |
| ENSGALG00000015660 | 2274,63097 | -0,475673447 | 0,12210103 | -3,8957367 | 9,79E-05   | 0,00112766 | SNX30    |
| ENSGALG00000012586 | 1975,98196 | -0,476656889 | 0,11252641 | -4,2359557 | 2,28E-05   | 0,00030611 | GKAP1    |
| ENSGALG00000000316 | 1513,96938 | -0,476826949 | 0,12199447 | -3,9085948 | 9,28E-05   | 0,00107924 |          |
| ENSGALG00000024481 | 3771,0681  | -0,479725051 | 0,11484828 | -4,177033  | 2,95E-05   | 0,00038725 |          |
| ENSGALG00000003782 | 9195,14164 | -0,482389155 | 0,1220329  | -3,9529435 | 7,72E-05   | 0,00091791 |          |
| ENSGALG00000014537 | 1887,30146 | -0,482456357 | 0,13681311 | -3,5263898 | 0,00042127 | 0,00395321 | BMF      |
| ENSGALG00000029011 | 28886,6858 | -0,483499319 | 0,07402631 | -6,5314526 | 6,51E-11   | 2,18E-09   | SLC35F1  |
| ENSGALG00000015037 | 2876,08049 | -0,483915865 | 0,10209562 | -4,7398299 | 2,14E-06   | 3,64E-05   | EVC      |
| ENSGALG00000010316 | 6055,57077 | -0,484012085 | 0,12348301 | -3,9196654 | 8,87E-05   | 0,00103754 | FRAS1    |
| ENSGALG00000016518 | 2706,67897 | -0,485066531 | 0,11148666 | -4,3508932 | 1,36E-05   | 0,00019517 | PHKA2    |
| ENSGALG00000010818 | 5671,54414 | -0,485799462 | 0,10196839 | -4,7642161 | 1,90E-06   | 3,26E-05   | PLPP3    |
| ENSGALG00000009291 | 1052,37449 | -0,489358793 | 0,13781708 | -3,5507847 | 0,00038408 | 0,00366198 | EPHX1    |
| ENSGALG00000001966 | 2082,4586  | -0,490465312 | 0,14000341 | -3,5032383 | 0,00045964 | 0,00423064 |          |

|                    |            |              |            |            |            |            |          |
|--------------------|------------|--------------|------------|------------|------------|------------|----------|
| ENSGALG00000005806 | 2070,07142 | -0,492123395 | 0,11517395 | -4,2728706 | 1,93E-05   | 0,00026497 | KIF24    |
| ENSGALG00000016244 | 1547,30105 | -0,492320823 | 0,12815771 | -3,8415233 | 0,00012227 | 0,00136808 |          |
| ENSGALG00000001816 | 2143,75098 | -0,495397442 | 0,135894   | -3,6454696 | 0,0002669  | 0,00268384 | MAGI3    |
| ENSGALG00000020626 | 1193,83839 | -0,496278462 | 0,14167036 | -3,5030507 | 0,00045996 | 0,00423064 |          |
| ENSGALG00000013722 | 3288,15489 | -0,496572265 | 0,12655366 | -3,9238082 | 8,72E-05   | 0,00102087 | SEMA3B   |
| ENSGALG00000016289 | 12122,6528 | -0,49658952  | 0,10671074 | -4,653604  | 3,26E-06   | 5,33E-05   | DST      |
| ENSGALG00000011444 | 5389,01007 | -0,497224463 | 0,11523481 | -4,3148806 | 1,60E-05   | 0,00022558 | MFHAS1   |
| ENSGALG00000009207 | 2177,62925 | -0,499904522 | 0,13219125 | -3,7816762 | 0,00015578 | 0,00168128 | TRIM2    |
| ENSGALG00000012017 | 6540,80506 | -0,499993655 | 0,08604614 | -5,8107619 | 6,22E-09   | 1,57E-07   | DAAM1    |
| ENSGALG00000005680 | 1094,2433  | -0,500648312 | 0,13778586 | -3,6335245 | 0,00027958 | 0,00279777 |          |
| ENSGALG00000003099 | 3627,50167 | -0,502434401 | 0,11543971 | -4,3523531 | 1,35E-05   | 0,00019432 | PCTP     |
| ENSGALG00000003539 | 4597,6882  | -0,503534691 | 0,0959582  | -5,2474378 | 1,54E-07   | 3,16E-06   | KIAA1522 |
| ENSGALG00000026505 | 1253,87743 | -0,503934058 | 0,14609798 | -3,4492883 | 0,00056207 | 0,00500419 |          |
| ENSGALG00000008060 | 1648,89018 | -0,504019022 | 0,12955696 | -3,8903277 | 0,00010011 | 0,00114992 | PRKAR2B  |
| ENSGALG00000006859 | 2008,47317 | -0,505092886 | 0,12844032 | -3,9325104 | 8,41E-05   | 0,0009883  |          |
| ENSGALG00000010811 | 6795,76845 | -0,506356689 | 0,1227478  | -4,1251794 | 3,70E-05   | 0,00047479 | LGMN     |
| ENSGALG00000012124 | 3819,62883 | -0,507526075 | 0,09613084 | -5,2795346 | 1,30E-07   | 2,69E-06   | PELI2    |
| ENSGALG00000015786 | 1271,75753 | -0,508635434 | 0,14394592 | -3,5335176 | 0,00041007 | 0,00387136 | REEP1    |
| ENSGALG00000011083 | 1036,15097 | -0,509062257 | 0,15598828 | -3,2634648 | 0,00110059 | 0,00884785 |          |
| ENSGALG00000004338 | 30363,8557 | -0,509560052 | 0,07503149 | -6,791283  | 1,11E-11   | 4,07E-10   |          |
| ENSGALG00000002777 | 11306,9083 | -0,509947463 | 0,08235673 | -6,1919342 | 5,94E-10   | 1,77E-08   |          |
| ENSGALG00000005107 | 11201,627  | -0,51021951  | 0,10373469 | -4,9185041 | 8,72E-07   | 1,60E-05   |          |
| ENSGALG00000015152 | 10783,9679 | -0,512951325 | 0,14885454 | -3,4459905 | 0,00056897 | 0,00504594 | BOC      |
| ENSGALG00000025977 | 2371,64375 | -0,513209442 | 0,10745001 | -4,7762626 | 1,79E-06   | 3,10E-05   | GADD45A  |
| ENSGALG00000028635 | 2843,21769 | -0,514353516 | 0,11810903 | -4,3549042 | 1,33E-05   | 0,00019229 |          |
| ENSGALG00000008728 | 786,945495 | -0,517913117 | 0,15751486 | -3,2880271 | 0,00100892 | 0,00820052 | PTER     |
| ENSGALG00000000912 | 1664,29263 | -0,519425471 | 0,11917413 | -4,3585423 | 1,31E-05   | 0,00018956 |          |
| ENSGALG00000010835 | 74050,5322 | -0,52138496  | 0,08594348 | -6,0666028 | 1,31E-09   | 3,68E-08   | DTX4     |
| ENSGALG00000022713 | 3872,09413 | -0,525946923 | 0,12443951 | -4,2265269 | 2,37E-05   | 0,00031683 |          |
| ENSGALG00000027714 | 1668,20814 | -0,526177638 | 0,12300172 | -4,2778071 | 1,89E-05   | 0,00026004 | ATG10    |
| ENSGALG00000005246 | 13679,395  | -0,527306483 | 0,1075472  | -4,903024  | 9,44E-07   | 1,73E-05   |          |
| ENSGALG00000014069 | 15161,3096 | -0,529241353 | 0,09850777 | -5,3725847 | 7,76E-08   | 1,68E-06   | TP53I11  |
| ENSGALG00000015628 | 929,886545 | -0,529404749 | 0,14733434 | -3,5932203 | 0,00032662 | 0,0031969  | MSANTD1  |
| ENSGALG00000013182 | 11579,6316 | -0,530382571 | 0,10696981 | -4,9582454 | 7,11E-07   | 1,32E-05   |          |
| ENSGALG00000010982 | 4044,72703 | -0,53129631  | 0,13536613 | -3,9248836 | 8,68E-05   | 0,00101918 |          |
| ENSGALG00000015847 | 1982,57576 | -0,531317329 | 0,11374907 | -4,6709596 | 3,00E-06   | 4,93E-05   | PRSS35   |
| ENSGALG00000003601 | 11958,9068 | -0,532351713 | 0,09422206 | -5,6499692 | 1,60E-08   | 3,87E-07   | ATP2B4   |
| ENSGALG00000006480 | 1476,70794 | -0,534658874 | 0,12638611 | -4,230361  | 2,33E-05   | 0,00031279 | TCF7     |
| ENSGALG00000003185 | 3385,21843 | -0,535546504 | 0,12368984 | -4,3297532 | 1,49E-05   | 0,00021268 | SCPEP1   |
| ENSGALG00000011518 | 813,593359 | -0,535965737 | 0,1518756  | -3,5289785 | 0,00041717 | 0,00392357 | POMGNT2  |
| ENSGALG00000027002 | 29714,3795 | -0,536298125 | 0,10571913 | -5,0728579 | 3,92E-07   | 7,58E-06   |          |
| ENSGALG00000003648 | 1181,0691  | -0,536868872 | 0,14374328 | -3,7349146 | 0,00018778 | 0,00198222 | SVIP     |
| ENSGALG00000013211 | 1995,32702 | -0,539056737 | 0,14233958 | -3,7871176 | 0,0001524  | 0,00164916 | Sial-T2  |
| ENSGALG00000016576 | 12672,1252 | -0,539357045 | 0,13054957 | -4,1314348 | 3,61E-05   | 0,00046252 | OFD1     |
| ENSGALG00000013155 | 2327,87007 | -0,539440335 | 0,12203608 | -4,4203349 | 9,85E-06   | 0,00014675 |          |
| ENSGALG00000028015 | 4297,84833 | -0,539854796 | 0,12735891 | -4,238846  | 2,25E-05   | 0,0003031  |          |
| ENSGALG00000000449 | 5699,15535 | -0,541504758 | 0,1320378  | -4,1011343 | 4,11E-05   | 0,00052028 |          |
| ENSGALG00000011298 | 3487,55527 | -0,543014986 | 0,11354366 | -4,7824332 | 1,73E-06   | 3,01E-05   | RARB     |
| ENSGALG00000004270 | 3394,83221 | -0,544775501 | 0,15590131 | -3,4943614 | 0,0004752  | 0,00434521 | ALDH1A2  |
| ENSGALG00000007269 | 2258,18619 | -0,545360128 | 0,11824854 | -4,6119821 | 3,99E-06   | 6,43E-05   | GABRA3   |
| ENSGALG00000016551 | 3348,17917 | -0,548003277 | 0,12821461 | -4,2741096 | 1,92E-05   | 0,00026408 | AP1S2    |
| ENSGALG00000029102 | 8856,23983 | -0,549378242 | 0,09139118 | -6,0112829 | 1,84E-09   | 5,02E-08   | PXYLP1   |
| ENSGALG00000008433 | 2467,54155 | -0,549541331 | 0,11423742 | -4,8105196 | 1,51E-06   | 2,65E-05   |          |
| ENSGALG00000007245 | 695,960091 | -0,550277699 | 0,16045688 | -3,4294429 | 0,00060482 | 0,00533548 |          |
| ENSGALG00000013964 | 1040,16713 | -0,55034782  | 0,13837128 | -3,977327  | 6,97E-05   | 0,00083828 | SPATA18  |
| ENSGALG00000002552 | 868,094238 | -0,551384108 | 0,15097485 | -3,6521586 | 0,00026005 | 0,00262813 |          |
| ENSGALG00000012219 | 2204,64004 | -0,554221866 | 0,12302026 | -4,5051268 | 6,63E-06   | 0,00010372 | UNC5C    |
| ENSGALG00000004323 | 3093,09427 | -0,5545441   | 0,12637337 | -4,3881405 | 1,14E-05   | 0,00016765 | RASAL2   |
| ENSGALG00000015987 | 4635,85249 | -0,554680878 | 0,12141534 | -4,5684578 | 4,91E-06   | 7,84E-05   |          |
| ENSGALG00000008871 | 21521,8352 | -0,555142332 | 0,09290105 | -5,9756301 | 2,29E-09   | 6,13E-08   |          |
| ENSGALG00000004593 | 2415,84953 | -0,555306466 | 0,163609   | -3,3941071 | 0,00068853 | 0,00594806 | SULF2    |
| ENSGALG00000026757 | 7722,36602 | -0,557063112 | 0,08452448 | -6,5905534 | 4,38E-11   | 1,50E-09   |          |



|                    |            |              |            |            |            |            |          |
|--------------------|------------|--------------|------------|------------|------------|------------|----------|
| ENSGALG00000014242 | 1501,10358 | -0,557782152 | 0,14125221 | -3,9488383 | 7,85E-05   | 0,0009329  |          |
| ENSGALG00000012710 | 1128,84374 | -0,557841328 | 0,15170545 | -3,6771344 | 0,00023587 | 0,00241843 | NCS1     |
| ENSGALG00000004775 | 914,832175 | -0,558344864 | 0,14503927 | -3,8496118 | 0,00011831 | 0,00133083 |          |
| ENSGALG00000015593 | 2880,67783 | -0,558901424 | 0,11770789 | -4,7482072 | 2,05E-06   | 3,50E-05   | EPHA7    |
| ENSGALG00000004537 | 5159,7803  | -0,559387674 | 0,08988409 | -6,2234338 | 4,86E-10   | 1,48E-08   |          |
| ENSGALG00000017247 | 4207,7876  | -0,562403241 | 0,09675844 | -5,8124463 | 6,16E-09   | 1,56E-07   |          |
| ENSGALG00000000692 | 955,152266 | -0,563167267 | 0,16964073 | -3,3197645 | 0,00090093 | 0,00748326 | CDK18    |
| ENSGALG00000009799 | 18742,1488 | -0,563286437 | 0,12204958 | -4,6152265 | 3,93E-06   | 6,36E-05   |          |
| ENSGALG00000002375 | 32718,3264 | -0,563646666 | 0,12800002 | -4,403489  | 1,07E-05   | 0,00015732 | NOTCH1   |
| ENSGALG00000012487 | 1377,92439 | -0,566700383 | 0,13846686 | -4,0926789 | 4,26E-05   | 0,00053825 |          |
| ENSGALG00000028795 | 2245,71249 | -0,566961474 | 0,16346113 | -3,468479  | 0,00052341 | 0,00471035 |          |
| ENSGALG00000006583 | 5537,14066 | -0,567576615 | 0,11179655 | -5,0768704 | 3,84E-07   | 7,44E-06   | LSP1     |
| ENSGALG00000007007 | 719,343847 | -0,57059825  | 0,16187065 | -3,525026  | 0,00042344 | 0,00396469 |          |
| ENSGALG00000004741 | 4792,68775 | -0,573167729 | 0,0909464  | -6,3022583 | 2,93E-10   | 9,27E-09   | EPHB2    |
| ENSGALG00000004256 | 10783,2788 | -0,575998874 | 0,08476767 | -6,7950305 | 1,08E-11   | 3,97E-10   |          |
| ENSGALG00000004888 | 7031,61915 | -0,578281859 | 0,0937448  | -6,1686821 | 6,89E-10   | 2,03E-08   | RAI1     |
| ENSGALG00000004400 | 2735,32523 | -0,578988451 | 0,11404307 | -5,0769278 | 3,84E-07   | 7,44E-06   |          |
| ENSGALG00000013357 | 3130,31216 | -0,580498969 | 0,15257333 | -3,804721  | 0,00014196 | 0,00154959 |          |
| ENSGALG00000027173 | 1590,92759 | -0,581363396 | 0,13148887 | -4,4213887 | 9,81E-06   | 0,00014639 | TMEM159  |
| ENSGALG00000014485 | 4340,50749 | -0,582732951 | 0,10497253 | -5,5512902 | 2,84E-08   | 6,61E-07   | LDB2     |
| ENSGALG00000008034 | 2213,75476 | -0,582849514 | 0,15579351 | -3,7411669 | 0,00018317 | 0,00193681 | CASKIN2  |
| ENSGALG00000005396 | 1307,23993 | -0,582889644 | 0,13145181 | -4,4342459 | 9,24E-06   | 0,00013842 |          |
| ENSGALG00000011848 | 4663,28267 | -0,584806197 | 0,10489037 | -5,575404  | 2,47E-08   | 5,81E-07   |          |
| ENSGALG00000010940 | 1275,78523 | -0,585237912 | 0,15386088 | -3,8036823 | 0,00014256 | 0,00155339 | ACSS3    |
| ENSGALG00000003404 | 1593,24426 | -0,585273519 | 0,17593109 | -3,3267203 | 0,00087875 | 0,00732815 |          |
| ENSGALG00000002707 | 872,059957 | -0,585668905 | 0,17399105 | -3,3660864 | 0,00076243 | 0,00649674 | CHRNA2   |
| ENSGALG00000011657 | 4589,29906 | -0,589843047 | 0,0912792  | -6,4619656 | 1,03E-10   | 3,41E-09   | EAF2     |
| ENSGALG00000012748 | 903,483649 | -0,592402199 | 0,17585259 | -3,368743  | 0,00075512 | 0,00645203 | ELOVL2   |
| ENSGALG00000023279 | 941,141249 | -0,593060121 | 0,14801399 | -4,0067841 | 6,16E-05   | 0,00074752 | EPN3     |
| ENSGALG00000008961 | 48076,4841 | -0,593936394 | 0,13546511 | -4,3844233 | 1,16E-05   | 0,00017034 |          |
| ENSGALG00000006409 | 15248,7839 | -0,594856883 | 0,11200977 | -5,310759  | 1,09E-07   | 2,29E-06   |          |
| ENSGALG00000001916 | 3626,02385 | -0,595193183 | 0,09718325 | -6,124442  | 9,10E-10   | 2,63E-08   | SLIT3    |
| ENSGALG00000020554 | 873,190798 | -0,595564073 | 0,16838642 | -3,5368889 | 0,00040487 | 0,00382516 |          |
| ENSGALG00000015903 | 1387,24274 | -0,597526236 | 0,13866253 | -4,309212  | 1,64E-05   | 0,00022992 |          |
| ENSGALG00000002116 | 700,369856 | -0,598531501 | 0,16175305 | -3,7002796 | 0,00021536 | 0,00223751 | TEN1     |
| ENSGALG00000005036 | 1758,38822 | -0,599441683 | 0,16374911 | -3,6607325 | 0,0002515  | 0,0025494  | SH2D3C   |
| ENSGALG00000026180 | 3833,45288 | -0,59981586  | 0,14976744 | -4,0049816 | 6,20E-05   | 0,00075251 |          |
| ENSGALG00000012346 | 1154,67986 | -0,599840638 | 0,13375751 | -4,4845379 | 7,31E-06   | 0,00011243 |          |
| ENSGALG00000000927 | 2190,2949  | -0,600422638 | 0,14772586 | -4,0644382 | 4,81E-05   | 0,00060289 | ANGPTL2  |
| ENSGALG00000000644 | 7209,00394 | -0,60054163  | 0,12270703 | -4,8941093 | 9,88E-07   | 1,80E-05   |          |
| ENSGALG00000011350 | 541,285072 | -0,601290146 | 0,17331192 | -3,4694103 | 0,0005216  | 0,00469742 | NEGR1    |
| ENSGALG00000015661 | 1332,78697 | -0,601504233 | 0,14287821 | -4,2099089 | 2,55E-05   | 0,00034033 |          |
| ENSGALG00000010960 | 1489,43056 | -0,603326229 | 0,15158134 | -3,9802144 | 6,89E-05   | 0,00082975 | GALNT3   |
| ENSGALG00000007993 | 1260,65804 | -0,603453342 | 0,13715554 | -4,3997738 | 1,08E-05   | 0,00015985 | DCX      |
| ENSGALG00000003973 | 3817,71731 | -0,603622901 | 0,09870926 | -6,1151598 | 9,65E-10   | 2,75E-08   | TLCD1    |
| ENSGALG00000006942 | 9609,38746 | -0,606230537 | 0,07966615 | -7,6096378 | 2,75E-14   | 1,40E-12   |          |
| ENSGALG00000012697 | 695,072503 | -0,6064194   | 0,18664528 | -3,2490476 | 0,00115792 | 0,00920562 | SLC41A2  |
| ENSGALG00000026941 | 1374,3273  | -0,606678305 | 0,14040651 | -4,3208702 | 1,55E-05   | 0,00022017 |          |
| ENSGALG00000012712 | 1815,03517 | -0,607252424 | 0,12916444 | -4,70139   | 2,58E-06   | 4,32E-05   | RBM24    |
| ENSGALG00000015774 | 1065,02106 | -0,60746392  | 0,15041346 | -4,0386273 | 5,38E-05   | 0,0006613  | CYYR1    |
| ENSGALG00000015542 | 9498,31771 | -0,607580543 | 0,12993075 | -4,6761873 | 2,92E-06   | 4,82E-05   | PLPPR1   |
| ENSGALG00000009537 | 490,58222  | -0,607598218 | 0,18032255 | -3,3695076 | 0,00075303 | 0,00643855 | PPM1L    |
| ENSGALG00000000623 | 23029,3222 | -0,609505879 | 0,08219995 | -7,4149182 | 1,22E-13   | 5,72E-12   |          |
| ENSGALG00000003375 | 5633,57059 | -0,611230825 | 0,08908432 | -6,861262  | 6,83E-12   | 2,59E-10   |          |
| ENSGALG00000014627 | 944,560693 | -0,611235613 | 0,15029669 | -4,0668602 | 4,77E-05   | 0,00059726 |          |
| ENSGALG00000016251 | 5263,27603 | -0,611728855 | 0,14715775 | -4,1569598 | 3,23E-05   | 0,0004198  |          |
| ENSGALG00000002974 | 1437,50977 | -0,611833543 | 0,15307455 | -3,9969645 | 6,42E-05   | 0,00077544 | SPHKAP   |
| ENSGALG00000027240 | 7653,65786 | -0,611869645 | 0,14969349 | -4,0874834 | 4,36E-05   | 0,00054823 | TSPAN13  |
| ENSGALG00000002155 | 2491,16451 | -0,612943427 | 0,15977684 | -3,8362469 | 0,00012493 | 0,00139281 |          |
| ENSGALG00000008367 | 12046,292  | -0,614602858 | 0,10352854 | -5,9365551 | 2,91E-09   | 7,68E-08   | MDK      |
| ENSGALG00000003163 | 4932,62175 | -0,61460754  | 0,11759786 | -5,2263499 | 1,73E-07   | 3,51E-06   | GNAO1    |
| ENSGALG00000010551 | 740,499781 | -0,614933753 | 0,17383652 | -3,5374256 | 0,00040405 | 0,00382136 | CDC42EP3 |

|                    |            |              |            |            |            |            |          |
|--------------------|------------|--------------|------------|------------|------------|------------|----------|
| ENSGALG00000027183 | 953,592441 | -0,617367034 | 0,15820971 | -3,9022069 | 9,53E-05   | 0,00110199 |          |
| ENSGALG00000029070 | 932,579973 | -0,617616574 | 0,16266457 | -3,7968722 | 0,00014653 | 0,00159251 | FAM181A  |
| ENSGALG00000011798 | 1064,51312 | -0,617821943 | 0,17164092 | -3,5995026 | 0,00031883 | 0,003128   | HEBP1    |
| ENSGALG00000002652 | 11400,8043 | -0,621511478 | 0,12728765 | -4,8827319 | 1,05E-06   | 1,89E-05   |          |
| ENSGALG00000013505 | 3208,27244 | -0,621565495 | 0,14984432 | -4,1480752 | 3,35E-05   | 0,0004354  |          |
| ENSGALG00000003582 | 10849,7231 | -0,622442826 | 0,14351033 | -4,3372686 | 1,44E-05   | 0,00020648 | SLC1A3   |
| ENSGALG00000008555 | 1679,68251 | -0,624562442 | 0,15429616 | -4,0478159 | 5,17E-05   | 0,00064028 | MXI1     |
| ENSGALG00000007076 | 2388,80102 | -0,624816157 | 0,15466095 | -4,0399089 | 5,35E-05   | 0,000659   | CCNY     |
| ENSGALG00000016391 | 3109,4295  | -0,625110592 | 0,10416619 | -6,0010894 | 1,96E-09   | 5,30E-08   | CNKS2    |
| ENSGALG00000027377 | 1563,60517 | -0,626128444 | 0,12409736 | -5,0454616 | 4,52E-07   | 8,68E-06   |          |
| ENSGALG00000008774 | 10001,1995 | -0,627375234 | 0,09280246 | -6,7603298 | 1,38E-11   | 4,99E-10   |          |
| ENSGALG00000000584 | 815,161004 | -0,628246913 | 0,15550344 | -4,0400836 | 5,34E-05   | 0,000659   |          |
| ENSGALG00000005403 | 6166,93158 | -0,628470531 | 0,10727764 | -5,8583552 | 4,67E-09   | 1,21E-07   | DHRS11   |
| ENSGALG00000007819 | 1168,66551 | -0,629150395 | 0,15548421 | -4,0463942 | 5,20E-05   | 0,00064355 | PDZRN3   |
| ENSGALG00000015799 | 696,846524 | -0,630241657 | 0,16107768 | -3,9126566 | 9,13E-05   | 0,00106223 | ELAVL2   |
| ENSGALG00000015729 | 1257,59964 | -0,630253804 | 0,13571537 | -4,6439383 | 3,42E-06   | 5,58E-05   | LPAR1    |
| ENSGALG00000007892 | 2832,91388 | -0,631636449 | 0,10556148 | -5,9835882 | 2,18E-09   | 5,85E-08   | SPAG6    |
| ENSGALG00000007748 | 2144,94025 | -0,63248212  | 0,11245141 | -5,6244928 | 1,86E-08   | 4,44E-07   | SLC16A2  |
| ENSGALG00000000040 | 635,110846 | -0,633128633 | 0,18365469 | -3,4473862 | 0,00056604 | 0,00503123 |          |
| ENSGALG00000002897 | 1585,0892  | -0,633730718 | 0,13210035 | -4,7973432 | 1,61E-06   | 2,82E-05   | SLC16A14 |
| ENSGALG00000010320 | 1455,65862 | -0,636363776 | 0,13429986 | -4,7383799 | 2,15E-06   | 3,66E-05   | PAWR     |
| ENSGALG00000006152 | 1112,15045 | -0,63795304  | 0,16197274 | -3,9386446 | 8,19E-05   | 0,0009661  |          |
| ENSGALG00000002437 | 563,695653 | -0,638363537 | 0,17402082 | -3,668317  | 0,00024415 | 0,00249111 | FAM69B   |
| ENSGALG00000010269 | 920,840765 | -0,639329258 | 0,17097965 | -3,7392125 | 0,0001846  | 0,00195028 | KCNAB1   |
| ENSGALG00000001153 | 10543,8081 | -0,64025058  | 0,09353164 | -6,8452831 | 7,63E-12   | 2,88E-10   | AUTS2    |
| ENSGALG00000006826 | 5812,76792 | -0,641184602 | 0,13004063 | -4,9306482 | 8,20E-07   | 1,51E-05   | KLHL25   |
| ENSGALG00000028543 | 1233,57546 | -0,64250805  | 0,17971356 | -3,5751785 | 0,00034999 | 0,00339345 | FGFR4    |
| ENSGALG00000026460 | 5792,76927 | -0,643922736 | 0,09174473 | -7,018635  | 2,24E-12   | 9,13E-11   |          |
| ENSGALG00000012577 | 1370,05679 | -0,644333952 | 0,12936964 | -4,9805656 | 6,34E-07   | 1,19E-05   | FRMD3    |
| ENSGALG00000001516 | 2392,04392 | -0,648414359 | 0,13283038 | -4,8815216 | 1,05E-06   | 1,90E-05   |          |
| ENSGALG00000015241 | 2158,94253 | -0,649652118 | 0,12094277 | -5,3715665 | 7,81E-08   | 1,68E-06   |          |
| ENSGALG00000017036 | 2072,67923 | -0,649834759 | 0,14869137 | -4,3703596 | 1,24E-05   | 0,00018042 | LHFP     |
| ENSGALG00000000750 | 998,349389 | -0,65019981  | 0,16954656 | -3,8349336 | 0,0001256  | 0,00139654 |          |
| ENSGALG00000014508 | 1028,74107 | -0,651699626 | 0,19490886 | -3,3436121 | 0,00082695 | 0,00698    | CD38     |
| ENSGALG00000006490 | 2371,83217 | -0,651963707 | 0,12330582 | -5,2873719 | 1,24E-07   | 2,59E-06   | SCN3B    |
| ENSGALG00000002125 | 658,342298 | -0,653074319 | 0,17067212 | -3,826485  | 0,00012999 | 0,00143893 | TMOD1    |
| ENSGALG00000028043 | 7943,94691 | -0,65417089  | 0,08543968 | -7,6565229 | 1,91E-14   | 1,00E-12   |          |
| ENSGALG00000002840 | 4314,5965  | -0,659899714 | 0,10957661 | -6,0222678 | 1,72E-09   | 4,71E-08   | GRM4     |
| ENSGALG00000005886 | 3052,74002 | -0,660958059 | 0,12281861 | -5,3815792 | 7,38E-08   | 1,60E-06   | WSCD1    |
| ENSGALG00000029072 | 3177,58522 | -0,662820707 | 0,15123881 | -4,3826099 | 1,17E-05   | 0,00017156 | NTN3     |
| ENSGALG00000009439 | 566,603521 | -0,662995235 | 0,19541313 | -3,3927875 | 0,00069185 | 0,00596854 | GPR85    |
| ENSGALG00000002712 | 9163,53899 | -0,663245926 | 0,11304776 | -5,8669534 | 4,44E-09   | 1,15E-07   |          |
| ENSGALG00000005628 | 1530,5988  | -0,664092027 | 0,18442306 | -3,6009165 | 0,0003171  | 0,00311592 | COL9A3   |
| ENSGALG00000005657 | 1315,51328 | -0,664586696 | 0,19971819 | -3,3276222 | 0,00087591 | 0,00731033 | CRHR2    |
| ENSGALG00000011592 | 769,411267 | -0,666316729 | 0,16592744 | -4,0157116 | 5,93E-05   | 0,00072188 | MRAS     |
| ENSGALG00000007732 | 416,813973 | -0,671216647 | 0,19001649 | -3,5324126 | 0,00041179 | 0,00388171 | RTN4R    |
| ENSGALG00000011019 | 3781,75966 | -0,672110507 | 0,11796056 | -5,697756  | 1,21E-08   | 2,97E-07   | ROR1     |
| ENSGALG00000016100 | 441,759488 | -0,672712737 | 0,2029277  | -3,3150365 | 0,00091631 | 0,0075858  |          |
| ENSGALG00000010775 | 2089,69413 | -0,672804554 | 0,12893781 | -5,2180549 | 1,81E-07   | 3,65E-06   |          |
| ENSGALG00000010119 | 1066,14976 | -0,672877793 | 0,15931928 | -4,2234548 | 2,41E-05   | 0,00032084 | CDKL2    |
| ENSGALG00000026055 | 2148,9591  | -0,673106345 | 0,1590473  | -4,2321142 | 2,32E-05   | 0,00031072 | PALM     |
| ENSGALG00000004309 | 779,594502 | -0,673847887 | 0,18081676 | -3,7266892 | 0,00019401 | 0,00203427 | GDAP1L1  |
| ENSGALG00000005774 | 3489,02871 | -0,674007323 | 0,11106476 | -6,0685974 | 1,29E-09   | 3,64E-08   |          |
| ENSGALG00000017106 | 466,641421 | -0,674065701 | 0,1927802  | -3,4965505 | 0,00047132 | 0,00431602 | ATP8A2   |
| ENSGALG00000016945 | 2967,84555 | -0,674331354 | 0,14913858 | -4,5215085 | 6,14E-06   | 9,66E-05   | LECT1    |
| ENSGALG00000012575 | 8218,93791 | -0,674390391 | 0,10186247 | -6,6205974 | 3,58E-11   | 1,23E-09   | TLE1     |
| ENSGALG00000026704 | 817,227006 | -0,675659204 | 0,17070288 | -3,9581008 | 7,55E-05   | 0,00090089 | GPX8     |
| ENSGALG00000007719 | 1302,68364 | -0,67764292  | 0,20270636 | -3,3429781 | 0,00082884 | 0,00699124 |          |
| ENSGALG00000006555 | 2117,21497 | -0,681158051 | 0,13379771 | -5,0909546 | 3,56E-07   | 6,96E-06   |          |
| ENSGALG00000016575 | 9168,66303 | -0,686420093 | 0,1297794  | -5,2891299 | 1,23E-07   | 2,57E-06   | GPM6B    |
| ENSGALG00000000151 | 1937,7168  | -0,687891713 | 0,11424333 | -6,0212854 | 1,73E-09   | 4,73E-08   | ADAMTS19 |
| ENSGALG00000001727 | 463,318695 | -0,689838866 | 0,18509677 | -3,7269093 | 0,00019384 | 0,0020342  | LZTS1    |

|                     |            |              |            |            |            |            |          |
|---------------------|------------|--------------|------------|------------|------------|------------|----------|
| ENSGALG00000005426  | 877,605348 | -0,690145659 | 0,15508752 | -4,45004   | 8,59E-06   | 0,00012955 | FREM1    |
| ENSGALG00000003550  | 652,802151 | -0,692363086 | 0,17977735 | -3,8512254 | 0,00011753 | 0,00132447 | ARHGAP40 |
| ENSGALG000000023073 | 20456,9956 | -0,692447843 | 0,08514089 | -8,1329649 | 4,19E-16   | 2,52E-14   |          |
| ENSGALG00000007364  | 1353,3018  | -0,692880741 | 0,18051262 | -3,8384061 | 0,00012384 | 0,001384   | TOB1     |
| ENSGALG00000009626  | 8049,48001 | -0,694120539 | 0,10537026 | -6,5874428 | 4,47E-11   | 1,53E-09   | THBS1    |
| ENSGALG00000012620  | 28578,6606 | -0,694383357 | 0,081059   | -8,566394  | 1,07E-17   | 7,34E-16   | PTCH1    |
| ENSGALG00000003580  | 1352,19249 | -0,694931491 | 0,15746973 | -4,4131115 | 1,02E-05   | 0,00015102 | MMP2     |
| ENSGALG00000027793  | 607,089392 | -0,696507844 | 0,18113408 | -3,8452612 | 0,00012042 | 0,00134981 | SCN9A    |
| ENSGALG00000010903  | 2596,79645 | -0,69779548  | 0,11340379 | -6,1531935 | 7,59E-10   | 2,22E-08   |          |
| ENSGALG00000002818  | 12036,7414 | -0,699438203 | 0,11243999 | -6,2205469 | 4,95E-10   | 1,50E-08   |          |
| ENSGALG00000003589  | 5291,70331 | -0,699453771 | 0,09356739 | -7,4754011 | 7,70E-14   | 3,70E-12   | VTN      |
| ENSGALG00000018624  | 844,593067 | -0,700079474 | 0,18303859 | -3,8247644 | 0,0001309  | 0,00144774 |          |
| ENSGALG00000006882  | 2236,27031 | -0,700351611 | 0,11195432 | -6,255691  | 3,96E-10   | 1,22E-08   | ST8SIA2  |
| ENSGALG00000002952  | 1456,76104 | -0,700899465 | 0,13291552 | -5,2732701 | 1,34E-07   | 2,78E-06   | NRG4     |
| ENSGALG00000012226  | 644,458201 | -0,707828644 | 0,18746681 | -3,7757545 | 0,00015952 | 0,00171729 |          |
| ENSGALG00000012775  | 643,488801 | -0,709215839 | 0,20574547 | -3,4470545 | 0,00056673 | 0,00503143 | TFAP2A   |
| ENSGALG00000004676  | 1415,38407 | -0,710261932 | 0,14188675 | -5,0058368 | 5,56E-07   | 1,05E-05   |          |
| ENSGALG00000029140  | 9887,31246 | -0,710672238 | 0,11105305 | -6,3993944 | 1,56E-10   | 5,08E-09   | CRABP2   |
| ENSGALG00000017405  | 1348,63296 | -0,713912912 | 0,17423648 | -4,0973791 | 4,18E-05   | 0,00052797 | NPR3     |
| ENSGALG00000015926  | 932,376679 | -0,714450321 | 0,16657966 | -4,2889409 | 1,80E-05   | 0,00024869 |          |
| ENSGALG00000019719  | 1763,03906 | -0,714724163 | 0,18211375 | -3,924603  | 8,69E-05   | 0,00101926 | KRT19    |
| ENSGALG00000025919  | 2203,75306 | -0,717706563 | 0,17787583 | -4,0348739 | 5,46E-05   | 0,00066999 |          |
| ENSGALG00000024486  | 1640,6708  | -0,717823268 | 0,14268972 | -5,0306586 | 4,89E-07   | 9,31E-06   |          |
| ENSGALG00000002016  | 716,489518 | -0,719060037 | 0,164965   | -4,3588642 | 1,31E-05   | 0,0001895  | PRKCD    |
| ENSGALG00000000674  | 402,036081 | -0,719912044 | 0,20464736 | -3,5178175 | 0,00043511 | 0,00405273 | MYO1D    |
| ENSGALG00000005608  | 3947,85993 | -0,721159959 | 0,11459976 | -6,2928576 | 3,12E-10   | 9,80E-09   | SLC9A3R2 |
| ENSGALG00000027198  | 9040,88356 | -0,721260873 | 0,09723673 | -7,4175766 | 1,19E-13   | 5,63E-12   | TMEM47   |
| ENSGALG00000011823  | 11238,0507 | -0,721999514 | 0,10012518 | -7,2109681 | 5,56E-13   | 2,43E-11   | FAT4     |
| ENSGALG00000003473  | 17669,5597 | -0,722769839 | 0,13594288 | -5,3167173 | 1,06E-07   | 2,23E-06   | SFRP1    |
| ENSGALG00000009248  | 4501,54609 | -0,722897324 | 0,13466182 | -5,3682427 | 7,95E-08   | 1,71E-06   | HSPA12A  |
| ENSGALG00000002749  | 1465,51039 | -0,723137568 | 0,13433788 | -5,3829757 | 7,33E-08   | 1,59E-06   |          |
| ENSGALG00000001449  | 3438,32151 | -0,723393814 | 0,10318556 | -7,0106112 | 2,37E-12   | 9,57E-11   | STRA6    |
| ENSGALG00000006792  | 350,301605 | -0,726229187 | 0,22053524 | -3,2930301 | 0,00099114 | 0,00807697 | VSTM2L   |
| ENSGALG00000011712  | 1179,53872 | -0,727241211 | 0,14005331 | -5,1926027 | 2,07E-07   | 4,14E-06   |          |
| ENSGALG00000012094  | 284,066214 | -0,727903351 | 0,22026176 | -3,3047196 | 0,00095071 | 0,00780859 | SLC35F4  |
| ENSGALG00000003894  | 796,557275 | -0,728609826 | 0,15200269 | -4,7934008 | 1,64E-06   | 2,86E-05   |          |
| ENSGALG00000027907  | 6182,31359 | -0,731289025 | 0,08932741 | -8,1866136 | 2,69E-16   | 1,66E-14   | NR2F1    |
| ENSGALG00000029004  | 2171,38417 | -0,731300396 | 0,17746098 | -4,120908  | 3,77E-05   | 0,00048269 |          |
| ENSGALG00000015597  | 952,530813 | -0,731477034 | 0,1532441  | -4,7732801 | 1,81E-06   | 3,13E-05   |          |
| ENSGALG00000015673  | 6092,107   | -0,738858521 | 0,12050003 | -6,1316045 | 8,70E-10   | 2,52E-08   |          |
| ENSGALG00000026858  | 6446,94204 | -0,741127309 | 0,11137264 | -6,6544825 | 2,84E-11   | 9,91E-10   | BTG2     |
| ENSGALG00000009020  | 13288,8425 | -0,742019908 | 0,08130962 | -9,125856  | 7,12E-20   | 5,90E-18   | JAG1     |
| ENSGALG00000005319  | 564,975279 | -0,742306515 | 0,19352205 | -3,8357723 | 0,00012517 | 0,00139302 | CDH8     |
| ENSGALG00000006211  | 4538,06281 | -0,742344985 | 0,0986063  | -7,5283727 | 5,14E-14   | 2,54E-12   | BCL2L1   |
| ENSGALG00000009536  | 396,027671 | -0,742471798 | 0,20594764 | -3,6051484 | 0,00031197 | 0,00307525 |          |
| ENSGALG00000000044  | 1571,14006 | -0,742898149 | 0,12135747 | -6,1215694 | 9,27E-10   | 2,66E-08   | WFIKKN1  |
| ENSGALG00000026119  | 1205,64066 | -0,744514312 | 0,18875953 | -3,9442475 | 8,01E-05   | 0,00094826 |          |
| ENSGALG00000002645  | 1167,98665 | -0,746278475 | 0,19471396 | -3,8326911 | 0,00012675 | 0,00140434 |          |
| ENSGALG00000011655  | 1680,80637 | -0,746810997 | 0,13582015 | -5,4985288 | 3,83E-08   | 8,71E-07   | IQCB1    |
| ENSGALG00000015075  | 456,601258 | -0,751299073 | 0,202365   | -3,7125939 | 0,00020515 | 0,00214026 |          |
| ENSGALG00000012440  | 13707,6458 | -0,752102714 | 0,10042226 | -7,4894023 | 6,92E-14   | 3,35E-12   |          |
| ENSGALG00000004370  | 1173,97528 | -0,752418484 | 0,16274623 | -4,6232621 | 3,78E-06   | 6,14E-05   | MAP2K6   |
| ENSGALG00000009048  | 718,531943 | -0,75410293  | 0,17428775 | -4,3267695 | 1,51E-05   | 0,00021509 | ABLIM1   |
| ENSGALG00000026179  | 302,231909 | -0,755339606 | 0,23357232 | -3,2338576 | 0,0012213  | 0,00962652 | FAM163B  |
| ENSGALG00000015448  | 3790,52276 | -0,755416575 | 0,16376879 | -4,6127018 | 3,97E-06   | 6,42E-05   |          |
| ENSGALG00000005626  | 527,341226 | -0,756044449 | 0,20533084 | -3,6820793 | 0,00023134 | 0,00237979 | TPST2    |
| ENSGALG00000011182  | 9658,13673 | -0,756680805 | 0,13954289 | -5,4225681 | 5,87E-08   | 1,30E-06   | DLL1     |
| ENSGALG00000000690  | 8376,38333 | -0,756893418 | 0,08326065 | -9,0906497 | 9,84E-20   | 8,05E-18   | GDPD4    |
| ENSGALG00000015768  | 2395,79768 | -0,757420183 | 0,12945293 | -5,8509311 | 4,89E-09   | 1,25E-07   |          |
| ENSGALG00000006793  | 352,610169 | -0,758190034 | 0,20784148 | -3,6479245 | 0,00026437 | 0,00266691 |          |
| ENSGALG00000009959  | 1998,29964 | -0,759714189 | 0,12312472 | -6,1702815 | 6,82E-10   | 2,02E-08   |          |
| ENSGALG00000006715  | 4235,48084 | -0,760061887 | 0,0985729  | -7,7106575 | 1,25E-14   | 6,63E-13   | OAF      |

|                    |            |              |            |            |            |            |          |
|--------------------|------------|--------------|------------|------------|------------|------------|----------|
| ENSGALG00000003434 | 13153,9326 | -0,761134193 | 0,10176159 | -7,4795823 | 7,46E-14   | 3,60E-12   | C17orf75 |
| ENSGALG00000003837 | 1171,25005 | -0,761557993 | 0,14071896 | -5,4119075 | 6,24E-08   | 1,37E-06   | ADCY7    |
| ENSGALG00000002909 | 7457,53402 | -0,762624106 | 0,09533386 | -7,999509  | 1,25E-15   | 7,23E-14   |          |
| ENSGALG00000003193 | 8812,21661 | -0,764114517 | 0,14621053 | -5,2261251 | 1,73E-07   | 3,51E-06   | CRABP-I  |
| ENSGALG00000002742 | 2459,13281 | -0,7644405   | 0,11429203 | -6,6884845 | 2,25E-11   | 7,99E-10   | TMEM132B |
| ENSGALG00000015297 | 1133,52891 | -0,764510224 | 0,13956384 | -5,477853  | 4,31E-08   | 9,76E-07   | FOXO3    |
| ENSGALG00000016543 | 3109,19527 | -0,766325509 | 0,11889026 | -6,4456544 | 1,15E-10   | 3,78E-09   | NHS      |
| ENSGALG00000006192 | 500,889627 | -0,767192565 | 0,19007181 | -4,0363301 | 5,43E-05   | 0,0006665  |          |
| ENSGALG00000015399 | 380,128404 | -0,76931559  | 0,20396936 | -3,7717213 | 0,00016213 | 0,00174157 | FUT10    |
| ENSGALG00000011742 | 234,220676 | -0,769619243 | 0,23242839 | -3,3112102 | 0,00092893 | 0,00766493 | ART4     |
| ENSGALG00000009732 | 5423,65869 | -0,771536411 | 0,14233295 | -5,420645  | 5,94E-08   | 1,31E-06   | PCDH18   |
| ENSGALG00000013194 | 2884,73548 | -0,772416578 | 0,1120601  | -6,8928778 | 5,47E-12   | 2,10E-10   |          |
| ENSGALG00000004331 | 987,414427 | -0,775822966 | 0,14440744 | -5,3724583 | 7,77E-08   | 1,68E-06   |          |
| ENSGALG00000012595 | 1196,34853 | -0,775902432 | 0,16489518 | -4,7054283 | 2,53E-06   | 4,24E-05   | AGTPBP1  |
| ENSGALG00000007623 | 3044,29553 | -0,778310378 | 0,11922769 | -6,5279333 | 6,67E-11   | 2,22E-09   | CACNA1G  |
| ENSGALG00000014853 | 603,727095 | -0,778595081 | 0,1836687  | -4,2391277 | 2,24E-05   | 0,0003031  | CLVS2    |
| ENSGALG00000026042 | 740,41298  | -0,780763307 | 0,23587999 | -3,3100024 | 0,00093295 | 0,00768428 |          |
| ENSGALG00000006341 | 275,593591 | -0,786972369 | 0,23377109 | -3,366423  | 0,0007615  | 0,00649324 |          |
| ENSGALG00000012191 | 7238,91303 | -0,787037882 | 0,10851003 | -7,2531352 | 4,07E-13   | 1,83E-11   |          |
| ENSGALG00000021593 | 580,680268 | -0,787646676 | 0,19140603 | -4,1150567 | 3,87E-05   | 0,00049258 |          |
| ENSGALG00000004028 | 313,965547 | -0,787784238 | 0,22915888 | -3,4377208 | 0,00058663 | 0,00519701 | MATN4    |
| ENSGALG00000010854 | 1552,15616 | -0,790623838 | 0,14163311 | -5,5821962 | 2,38E-08   | 5,61E-07   | HDAC9    |
| ENSGALG00000011487 | 7037,53698 | -0,797547344 | 0,08867908 | -8,9936355 | 2,39E-19   | 1,85E-17   |          |
| ENSGALG00000015476 | 710,998877 | -0,797713032 | 0,19508358 | -4,0890835 | 4,33E-05   | 0,00054556 |          |
| ENSGALG00000005892 | 22205,1699 | -0,805793553 | 0,08367702 | -9,6298065 | 5,98E-22   | 5,94E-20   |          |
| ENSGALG00000012652 | 512,848116 | -0,806982417 | 0,18892568 | -4,2714278 | 1,94E-05   | 0,0002664  |          |
| ENSGALG00000016223 | 637,815955 | -0,80722926  | 0,16999597 | -4,7485201 | 2,05E-06   | 3,50E-05   |          |
| ENSGALG00000004844 | 6351,78047 | -0,807613149 | 0,13771449 | -5,8644021 | 4,51E-09   | 1,17E-07   |          |
| ENSGALG00000007929 | 5051,2907  | -0,807992906 | 0,1300334  | -6,2137338 | 5,17E-10   | 1,56E-08   | DIXDC1   |
| ENSGALG00000002228 | 3137,43096 | -0,808972118 | 0,16544265 | -4,8897435 | 1,01E-06   | 1,83E-05   |          |
| ENSGALG00000004986 | 20927,5453 | -0,810825031 | 0,09474777 | -8,5577211 | 1,15E-17   | 7,87E-16   | CERCAM   |
| ENSGALG00000027498 | 3868,25329 | -0,813503322 | 0,13291213 | -6,1206102 | 9,32E-10   | 2,67E-08   | FOXB1    |
| ENSGALG00000004472 | 11062,9838 | -0,814406115 | 0,10696645 | -7,6136592 | 2,66E-14   | 1,37E-12   | ASTN1    |
| ENSGALG00000010055 | 752,36105  | -0,814715149 | 0,17382196 | -4,6870669 | 2,77E-06   | 4,60E-05   | DAAM2    |
| ENSGALG00000017374 | 378,439025 | -0,814717413 | 0,2081861  | -3,9134092 | 9,10E-05   | 0,00106189 |          |
| ENSGALG00000005903 | 1351,52    | -0,81577863  | 0,16378148 | -4,9808968 | 6,33E-07   | 1,19E-05   | NRIP3    |
| ENSGALG00000009514 | 9638,41366 | -0,816414808 | 0,09378509 | -8,7051667 | 3,17E-18   | 2,24E-16   | NRCAM    |
| ENSGALG00000013297 | 1134,91265 | -0,820011934 | 0,15144755 | -5,4144946 | 6,15E-08   | 1,35E-06   | BBOX1    |
| ENSGALG00000012092 | 334,595506 | -0,821365542 | 0,23392101 | -3,5112944 | 0,00044593 | 0,0041289  | ESYT3    |
| ENSGALG00000017332 | 676,273003 | -0,827504109 | 0,22658295 | -3,6521022 | 0,0002601  | 0,00262813 | KLHL35   |
| ENSGALG00000027300 | 4224,617   | -0,83359345  | 0,12039523 | -6,9238082 | 4,40E-12   | 1,70E-10   |          |
| ENSGALG00000026388 | 192,213198 | -0,83565579  | 0,23979309 | -3,4849036 | 0,00049231 | 0,00447555 |          |
| ENSGALG00000011206 | 1241,95142 | -0,836880661 | 0,13265101 | -6,30889   | 2,81E-10   | 8,90E-09   | KITLG    |
| ENSGALG00000002911 | 3538,18445 | -0,840005591 | 0,1545939  | -5,4336271 | 5,52E-08   | 1,24E-06   | MOXD1    |
| ENSGALG00000012715 | 336,22161  | -0,842621875 | 0,2238429  | -3,7643449 | 0,00016699 | 0,00178533 | CAP2     |
| ENSGALG00000022967 | 514,043952 | -0,84515578  | 0,20455601 | -4,1316596 | 3,60E-05   | 0,00046252 |          |
| ENSGALG00000011117 | 340,372899 | -0,850337952 | 0,2419193  | -3,5149653 | 0,00043981 | 0,00408392 | AGT      |
| ENSGALG00000003424 | 1326,91239 | -0,851626485 | 0,15683659 | -5,4300242 | 5,63E-08   | 1,26E-06   | LMX1A    |
| ENSGALG00000015084 | 885,260142 | -0,852219609 | 0,20558018 | -4,1454367 | 3,39E-05   | 0,00043874 | IGSF11   |
| ENSGALG00000023359 | 636,48694  | -0,852612547 | 0,1928659  | -4,4207533 | 9,84E-06   | 0,00014665 | BTBD17   |
| ENSGALG00000006873 | 2180,73864 | -0,854385087 | 0,11802019 | -7,2393131 | 4,51E-13   | 2,01E-11   | PHRF1    |
| ENSGALG00000017195 | 132,512378 | -0,858697871 | 0,2579367  | -3,3291031 | 0,00087126 | 0,0072803  | PGR      |
| ENSGALG00000009052 | 2878,13312 | -0,861077306 | 0,16724187 | -5,1486945 | 2,62E-07   | 5,19E-06   | LBH      |
| ENSGALG00000026192 | 3872,6926  | -0,861152656 | 0,11660797 | -7,3850243 | 1,52E-13   | 7,11E-12   | ST8SIA4  |
| ENSGALG00000026214 | 847,888186 | -0,867136808 | 0,18566435 | -4,6704539 | 3,01E-06   | 4,94E-05   | LRTM2    |
| ENSGALG00000028946 | 302,158738 | -0,867278013 | 0,21980251 | -3,9457147 | 7,96E-05   | 0,00094425 |          |
| ENSGALG00000009478 | 940,161846 | -0,868396515 | 0,21374409 | -4,0627861 | 4,85E-05   | 0,00060596 |          |
| ENSGALG00000006662 | 604,284175 | -0,86909427  | 0,21853019 | -3,9769986 | 6,98E-05   | 0,00083863 |          |
| ENSGALG00000027484 | 107,369685 | -0,870548896 | 0,26698629 | -3,2606502 | 0,00111157 | 0,00890653 | C20orf85 |
| ENSGALG00000021031 | 6097,64928 | -0,871546666 | 0,10804236 | -8,0667127 | 7,22E-16   | 4,30E-14   | ACKR3    |
| ENSGALG00000008297 | 5581,87806 | -0,875877387 | 0,0888238  | -9,8608413 | 6,15E-23   | 6,64E-21   | SEMA4B   |
| ENSGALG00000011709 | 491,428075 | -0,876476185 | 0,23285575 | -3,7640307 | 0,0001672  | 0,00178605 |          |

|                    |            |              |            |            |            |            |         |
|--------------------|------------|--------------|------------|------------|------------|------------|---------|
| ENSGALG00000003345 | 838,196489 | -0,878084006 | 0,15479837 | -5,6724371 | 1,41E-08   | 3,43E-07   |         |
| ENSGALG00000023738 | 720,292835 | -0,882263773 | 0,18476554 | -4,7750451 | 1,80E-06   | 3,11E-05   |         |
| ENSGALG00000007441 | 1451,19846 | -0,88468627  | 0,1740619  | -5,0825959 | 3,72E-07   | 7,24E-06   |         |
| ENSGALG00000027501 | 978,829878 | -0,88631831  | 0,14664686 | -6,0438954 | 1,50E-09   | 4,17E-08   | ANPEP   |
| ENSGALG00000004527 | 511,661724 | -0,887058508 | 0,20448368 | -4,3380405 | 1,44E-05   | 0,00020599 |         |
| ENSGALG00000006235 | 1550,13485 | -0,888605951 | 0,18068598 | -4,9179574 | 8,75E-07   | 1,61E-05   |         |
| ENSGALG00000003426 | 2655,93043 | -0,891859274 | 0,1255624  | -7,1029166 | 1,22E-12   | 5,14E-11   | RHBDL3  |
| ENSGALG00000028371 | 2318,19897 | -0,893107554 | 0,18274531 | -4,8871708 | 1,02E-06   | 1,85E-05   |         |
| ENSGALG00000012006 | 1652,91118 | -0,89358513  | 0,13601021 | -6,5699857 | 5,03E-11   | 1,70E-09   | RTN1    |
| ENSGALG00000028931 | 2326,56897 | -0,894112314 | 0,12608288 | -7,091465  | 1,33E-12   | 5,53E-11   |         |
| ENSGALG00000001129 | 1687,21268 | -0,899923251 | 0,15466843 | -5,818403  | 5,94E-09   | 1,51E-07   |         |
| ENSGALG00000000678 | 793,449754 | -0,899943985 | 0,22197436 | -4,0542701 | 5,03E-05   | 0,00062534 | CITED4  |
| ENSGALG00000015186 | 836,758425 | -0,900331794 | 0,15959516 | -5,6413479 | 1,69E-08   | 4,04E-07   |         |
| ENSGALG00000006245 | 281,138415 | -0,900397348 | 0,25179693 | -3,5758869 | 0,00034904 | 0,00338989 |         |
| ENSGALG00000029057 | 576,095316 | -0,907467539 | 0,18536984 | -4,8954433 | 9,81E-07   | 1,79E-05   |         |
| ENSGALG00000009603 | 326,307151 | -0,909672796 | 0,25065366 | -3,6292021 | 0,0002843  | 0,00283596 |         |
| ENSGALG00000017074 | 110,235407 | -0,912794343 | 0,27273176 | -3,3468575 | 0,00081733 | 0,00691746 |         |
| ENSGALG00000028234 | 573,481229 | -0,912907561 | 0,22530534 | -4,0518682 | 5,08E-05   | 0,00063117 |         |
| ENSGALG00000015967 | 195,046703 | -0,91657646  | 0,23708171 | -3,8660784 | 0,0001106  | 0,00125543 | LRRTM1  |
| ENSGALG00000004530 | 1049,1338  | -0,916608336 | 0,21450742 | -4,2730846 | 1,93E-05   | 0,00026497 | MMD2    |
| ENSGALG00000028790 | 633,225912 | -0,919355636 | 0,19021109 | -4,833344  | 1,34E-06   | 2,38E-05   | DNASE2B |
| ENSGALG00000020688 | 639,432719 | -0,921010154 | 0,21245986 | -4,3349843 | 1,46E-05   | 0,00020792 |         |
| ENSGALG00000020376 | 2296,58151 | -0,925271568 | 0,10950523 | -8,449565  | 2,92E-17   | 1,90E-15   |         |
| ENSGALG00000007078 | 118,265561 | -0,925877896 | 0,27021704 | -3,426423  | 0,00061159 | 0,00537621 |         |
| ENSGALG00000005539 | 516,027592 | -0,927364348 | 0,19120632 | -4,8500715 | 1,23E-06   | 2,21E-05   |         |
| ENSGALG00000006346 | 1363,78378 | -0,927790987 | 0,17515018 | -5,2971169 | 1,18E-07   | 2,47E-06   | CXCL14  |
| ENSGALG00000027154 | 1132,69645 | -0,928050292 | 0,17313065 | -5,3604045 | 8,30E-08   | 1,77E-06   |         |
| ENSGALG00000029106 | 1760,23678 | -0,929278314 | 0,13137058 | -7,0737171 | 1,51E-12   | 6,27E-11   |         |
| ENSGALG00000012747 | 3481,16686 | -0,930889427 | 0,16898793 | -5,508615  | 3,62E-08   | 8,30E-07   | NEDD9   |
| ENSGALG00000020575 | 478,814354 | -0,930944308 | 0,20604338 | -4,5181957 | 6,24E-06   | 9,79E-05   |         |
| ENSGALG00000028745 | 260,770335 | -0,940548991 | 0,23003741 | -4,0886784 | 4,34E-05   | 0,00054596 |         |
| ENSGALG00000009237 | 245,620907 | -0,942598283 | 0,22912432 | -4,1139163 | 3,89E-05   | 0,00049452 |         |
| ENSGALG00000009042 | 1781,95784 | -0,948736093 | 0,13944347 | -6,8037326 | 1,02E-11   | 3,75E-10   | ISM1    |
| ENSGALG00000026622 | 538,54299  | -0,952490076 | 0,18017774 | -5,2863915 | 1,25E-07   | 2,60E-06   |         |
| ENSGALG00000004849 | 4449,83906 | -0,955100006 | 0,11584173 | -8,2448699 | 1,65E-16   | 1,03E-14   | WSCD2   |
| ENSGALG00000000280 | 585,892203 | -0,956447554 | 0,17580335 | -5,4404398 | 5,31E-08   | 1,20E-06   | EFNA5   |
| ENSGALG00000027514 | 44,3005488 | -0,958727122 | 0,26964144 | -3,555563  | 0,00037717 | 0,00360705 |         |
| ENSGALG00000011200 | 585,083893 | -0,962880109 | 0,21843281 | -4,4081295 | 1,04E-05   | 0,00015417 | THBS2   |
| ENSGALG00000001063 | 2024,22024 | -0,96616322  | 0,18451124 | -5,2363381 | 1,64E-07   | 3,34E-06   |         |
| ENSGALG00000006507 | 1219,79935 | -0,967854239 | 0,13223106 | -7,3194168 | 2,49E-13   | 1,13E-11   | CLMP    |
| ENSGALG00000004790 | 24425,8053 | -0,971232729 | 0,24050391 | -4,0383241 | 5,38E-05   | 0,00066151 |         |
| ENSGALG00000028005 | 1938,07994 | -0,972644101 | 0,16792696 | -5,7920664 | 6,95E-09   | 1,74E-07   | GADD45G |
| ENSGALG00000016459 | 278,752189 | -0,980053688 | 0,21673389 | -4,5219218 | 6,13E-06   | 9,65E-05   | FAM84A  |
| ENSGALG00000016222 | 2409,35151 | -0,982900573 | 0,14501715 | -6,7778229 | 1,22E-11   | 4,45E-10   | NDP     |
| ENSGALG00000026153 | 543,41516  | -0,984548638 | 0,18483355 | -5,326677  | 1,00E-07   | 2,11E-06   |         |
| ENSGALG00000014829 | 780,481119 | -0,984611419 | 0,22187254 | -4,4377345 | 9,09E-06   | 0,00013652 |         |
| ENSGALG00000026560 | 1741,85122 | -0,986320846 | 0,13866695 | -7,1128761 | 1,14E-12   | 4,80E-11   |         |
| ENSGALG00000007419 | 131,80991  | -0,986369449 | 0,27049343 | -3,6465561 | 0,00026578 | 0,00267683 | MASP1   |
| ENSGALG00000017021 | 594,509791 | -0,994338044 | 0,18535281 | -5,3645694 | 8,11E-08   | 1,74E-06   | ATP7B   |
| ENSGALG00000001795 | 808,510482 | -0,995172186 | 0,18954952 | -5,2501962 | 1,52E-07   | 3,12E-06   |         |
| ENSGALG00000002832 | 341,099375 | -0,995334878 | 0,21073325 | -4,7231981 | 2,32E-06   | 3,92E-05   | IFI35   |
| ENSGALG00000002098 | 280,73409  | -0,997392471 | 0,25960887 | -3,8419045 | 0,00012208 | 0,00136718 | GRIK3   |
| ENSGALG00000006563 | 4758,12134 | -1,001967625 | 0,10653632 | -9,4049393 | 5,21E-21   | 4,82E-19   | SEMA3D  |
| ENSGALG00000019280 | 829,693531 | -1,005672086 | 0,15079747 | -6,669025  | 2,58E-11   | 9,05E-10   |         |
| ENSGALG00000020876 | 273,366838 | -1,006719844 | 0,26113425 | -3,8551811 | 0,00011564 | 0,00130677 |         |
| ENSGALG00000003554 | 4815,21553 | -1,008700457 | 0,1286997  | -7,8376287 | 4,59E-15   | 2,53E-13   | OPTC    |
| ENSGALG00000016570 | 243,048597 | -1,009438758 | 0,22517634 | -4,4828811 | 7,36E-06   | 0,00011317 |         |
| ENSGALG00000010500 | 3048,93457 | -1,016915026 | 0,1141321  | -8,9099825 | 5,10E-19   | 3,85E-17   | NKX6-2  |
| ENSGALG00000020615 | 425,649069 | -1,022483514 | 0,20534443 | -4,9793584 | 6,38E-07   | 1,19E-05   | STK32C  |
| ENSGALG00000027891 | 12053,1726 | -1,030686173 | 0,08559178 | -12,041883 | 2,14E-33   | 3,77E-31   |         |
| ENSGALG00000005981 | 1473,77881 | -1,035267465 | 0,18464036 | -5,6069401 | 2,06E-08   | 4,90E-07   | GDF2    |
| ENSGALG00000003551 | 1571,2827  | -1,036323807 | 0,13255448 | -7,8180974 | 5,36E-15   | 2,94E-13   |         |

|                     |            |              |            |            |          |            |         |
|---------------------|------------|--------------|------------|------------|----------|------------|---------|
| ENSGALG00000016810  | 5739,43629 | -1,036681311 | 0,12690987 | -8,1686423 | 3,12E-16 | 1,90E-14   |         |
| ENSGALG00000002298  | 1870,01778 | -1,039424987 | 0,15003565 | -6,9278535 | 4,27E-12 | 1,67E-10   | COL8A2  |
| ENSGALG000000020788 | 2719,7038  | -1,041075867 | 0,11340313 | -9,1803095 | 4,30E-20 | 3,66E-18   |         |
| ENSGALG000000008279 | 45522,988  | -1,052545903 | 0,11115526 | -9,469151  | 2,82E-21 | 2,65E-19   |         |
| ENSGALG000000008455 | 5120,18929 | -1,05482755  | 0,15577951 | -6,7712854 | 1,28E-11 | 4,64E-10   |         |
| ENSGALG000000027821 | 3043,02821 | -1,05591502  | 0,14824678 | -7,1226844 | 1,06E-12 | 4,52E-11   |         |
| ENSGALG000000013363 | 1658,14825 | -1,059850407 | 0,15135845 | -7,0022548 | 2,52E-12 | 1,01E-10   |         |
| ENSGALG000000006576 | 474,441333 | -1,060241233 | 0,24449814 | -4,336398  | 1,45E-05 | 0,00020682 | GRM3    |
| ENSGALG000000009601 | 8847,52543 | -1,061491773 | 0,12977069 | -8,1797498 | 2,84E-16 | 1,75E-14   | NELL2   |
| ENSGALG000000003588 | 1399,08969 | -1,081475528 | 0,13003924 | -8,3165325 | 9,06E-17 | 5,72E-15   |         |
| ENSGALG000000009638 | 352,651719 | -1,085140036 | 0,22094352 | -4,9113911 | 9,04E-07 | 1,66E-05   | ANO6    |
| ENSGALG000000007908 | 401,240258 | -1,09305059  | 0,19841137 | -5,5090119 | 3,61E-08 | 8,30E-07   |         |
| ENSGALG000000007781 | 567,69339  | -1,095474125 | 0,20462468 | -5,3535776 | 8,62E-08 | 1,84E-06   | GAL3ST1 |
| ENSGALG000000013948 | 833,750503 | -1,099632212 | 0,18641525 | -5,8988318 | 3,66E-09 | 9,54E-08   | RASL11B |
| ENSGALG000000028682 | 140,240123 | -1,101427497 | 0,25860917 | -4,2590428 | 2,05E-05 | 0,00028006 | CBLN2   |
| ENSGALG000000008440 | 326,768063 | -1,108083257 | 0,21643685 | -5,1196608 | 3,06E-07 | 6,02E-06   | CHST1   |
| ENSGALG000000007211 | 263,73208  | -1,108214376 | 0,2365099  | -4,6856998 | 2,79E-06 | 4,62E-05   | CDH22   |
| ENSGALG000000016636 | 272,318125 | -1,110176301 | 0,23729514 | -4,6784621 | 2,89E-06 | 4,78E-05   |         |
| ENSGALG000000028506 | 1366,3389  | -1,110787668 | 0,13126336 | -8,4622829 | 2,62E-17 | 1,71E-15   | NHSL2   |
| ENSGALG000000023904 | 802,719075 | -1,115042621 | 0,15879335 | -7,0219729 | 2,19E-12 | 8,94E-11   | FIBIN   |
| ENSGALG000000005985 | 8172,66492 | -1,116443935 | 0,11421091 | -9,7752824 | 1,44E-22 | 1,49E-20   | GDF10   |
| ENSGALG000000016511 | 275,151393 | -1,119703281 | 0,22403272 | -4,9979453 | 5,79E-07 | 1,10E-05   | ADGRG2  |
| ENSGALG000000012123 | 16654,8584 | -1,123025117 | 0,07863736 | -14,281063 | 2,87E-46 | 8,16E-44   | PAX6    |
| ENSGALG000000002028 | 1441,95498 | -1,145532965 | 0,19074043 | -6,0057167 | 1,90E-09 | 5,16E-08   | GPRC5B  |
| ENSGALG000000003965 | 6511,37534 | -1,147515866 | 0,15881452 | -7,2255096 | 4,99E-13 | 2,21E-11   | DBX1    |
| ENSGALG000000004448 | 445,618082 | -1,158751146 | 0,22989436 | -5,0403635 | 4,65E-07 | 8,87E-06   | BRINP2  |
| ENSGALG000000014699 | 1041,3098  | -1,163328429 | 0,21482752 | -5,4151741 | 6,12E-08 | 1,35E-06   | MEGF10  |
| ENSGALG000000013900 | 1854,85305 | -1,17030528  | 0,14712084 | -7,9547211 | 1,80E-15 | 1,03E-13   | MAP7    |
| ENSGALG000000027633 | 302,366053 | -1,199702733 | 0,21814739 | -5,4995053 | 3,81E-08 | 8,68E-07   | RASSF9  |
| ENSGALG000000001264 | 15314,0129 | -1,21609258  | 0,1243485  | -9,7797129 | 1,38E-22 | 1,43E-20   | PLXNA2  |
| ENSGALG000000008215 | 2557,20905 | -1,222668874 | 0,12813223 | -9,5422426 | 1,40E-21 | 1,36E-19   |         |
| ENSGALG000000006210 | 10737,2281 | -1,225951378 | 0,09874124 | -12,415799 | 2,15E-35 | 4,40E-33   |         |
| ENSGALG000000005967 | 601,737643 | -1,230002366 | 0,21719963 | -5,663004  | 1,49E-08 | 3,61E-07   |         |
| ENSGALG000000023114 | 289,478138 | -1,251095176 | 0,23426953 | -5,3404092 | 9,27E-08 | 1,97E-06   | TAL2    |
| ENSGALG000000026395 | 5473,90727 | -1,254721779 | 0,10114284 | -12,405443 | 2,44E-35 | 4,93E-33   | TRABD2A |
| ENSGALG000000014258 | 1644,91976 | -1,256488908 | 0,16302387 | -7,7073924 | 1,28E-14 | 6,78E-13   | LIMCH1  |
| ENSGALG000000023577 | 185,179234 | -1,257090663 | 0,26329484 | -4,77446   | 1,80E-06 | 3,11E-05   |         |
| ENSGALG000000016411 | 2414,195   | -1,262862187 | 0,12175871 | -10,371843 | 3,33E-25 | 4,12E-23   |         |
| ENSGALG000000016428 | 17978,0384 | -1,276203339 | 0,12837408 | -9,9412849 | 2,75E-23 | 3,07E-21   |         |
| ENSGALG000000029012 | 451,347482 | -1,299502297 | 0,18638978 | -6,971961  | 3,13E-12 | 1,24E-10   |         |
| ENSGALG000000007945 | 609,326872 | -1,299576949 | 0,18158766 | -7,156747  | 8,26E-13 | 3,54E-11   | CRYAB   |
| ENSGALG000000009604 | 7273,89514 | -1,349943691 | 0,11617707 | -11,619708 | 3,27E-31 | 5,32E-29   | DBX2    |
| ENSGALG000000009948 | 2089,1825  | -1,364538663 | 0,11221803 | -12,15971  | 5,09E-34 | 9,80E-32   | HHIP    |
| ENSGALG000000012184 | 1097,0824  | -1,376965225 | 0,21041222 | -6,5441314 | 5,98E-11 | 2,01E-09   |         |
| ENSGALG000000005413 | 755,657663 | -1,418701803 | 0,22290236 | -6,3646784 | 1,96E-10 | 6,28E-09   |         |
| ENSGALG000000005975 | 1102,4413  | -1,45581134  | 0,21067685 | -6,9101628 | 4,84E-12 | 1,86E-10   |         |
| ENSGALG000000011205 | 1465,86067 | -1,462754207 | 0,13057425 | -11,20247  | 3,97E-29 | 5,98E-27   | SMOC2   |
