# Supplementary material for: HOXB8 Counteracts MAPK/ERK Oncogenic Signaling in a Chicken Embryo Model of Neoplasia
Source: MDPI journal article supplement (doi:10.3390/ijms22168911), 2021-08-18
Supplement: s1 [file s1]

**Table S5:** Classification of the 2316 genes deregulated in the “MEK1ca versus pCIG” condition (False Discovery Rate (padj) <= 0.05) clustered using “kmeans” with k=12, with the mean TPM (transcripts per kilobase million) of each gene for the two replicates of pCIG, HOXB8, MEK1ca, and MEK1ca+HOXB8 in each condition.

| ID                 | Symbol     | pCIG        | HOXB8       | MEK1ca      | MEK1_HOXB8  | Cluster |
|--------------------|------------|-------------|-------------|-------------|-------------|---------|
| ENSGALG00000000141 | BLB1       | 4,346461397 | 6,936083838 | 25,83463981 | 9,813152958 | 1       |
| ENSGALG00000000307 |            | 59,23843877 | 89,71588529 | 143,6917892 | 78,57624532 | 1       |
| ENSGALG00000000600 |            | 0,16716819  | 0,219662917 | 4,032909459 | 0,585105026 | 1       |
| ENSGALG00000000639 | LRRN2      | 4,627904717 | 4,790564693 | 9,521707125 | 5,306668428 | 1       |
| ENSGALG00000000761 | TSKU       | 53,35356817 | 54,75872543 | 78,02304089 | 50,7231382  | 1       |
| ENSGALG00000000795 | MFSD12     | 15,27116365 | 19,51741298 | 24,13081695 | 17,43156709 | 1       |
| ENSGALG00000000977 | MAPKAP1    | 76,21721102 | 75,42044153 | 139,8918526 | 69,33283402 | 1       |
| ENSGALG00000001094 | ADGRD2     | 102,7073676 | 111,4654329 | 121,4385963 | 94,7567043  | 1       |
| ENSGALG00000001220 | HERPUD1    | 52,87970256 | 43,77611515 | 97,02489846 | 55,98900064 | 1       |
| ENSGALG00000001346 |            | 12,45034341 | 13,79821487 | 25,17364864 | 8,821835481 | 1       |
| ENSGALG00000001370 | ADAMTS8    | 10,00645846 | 11,44367995 | 17,37313634 | 8,098120229 | 1       |
| ENSGALG00000001383 | HTR4       | 0,223346685 | 0,462240728 | 2,654657367 | 0,480455141 | 1       |
| ENSGALG00000001405 | IRF6       | 2,701639368 | 2,9520233   | 6,01110282  | 3,704203216 | 1       |
| ENSGALG00000001419 | DAB2IP     | 8,238485904 | 12,58819262 | 17,26179821 | 10,32238732 | 1       |
| ENSGALG00000001560 |            | 0,150607399 | 0,295573757 | 2,997594118 | 0,175011822 | 1       |
| ENSGALG00000001596 | MLLT1      | 104,5141917 | 111,7769614 | 144,5899475 | 114,1039573 | 1       |
| ENSGALG00000001621 | CLDN5      | 1,779507208 | 3,559103071 | 26,91827318 | 8,738372257 | 1       |
| ENSGALG00000002183 | PRR16      | 1,802939556 | 2,415784551 | 21,12574473 | 2,851415468 | 1       |
| ENSGALG00000002242 |            | 3,30906785  | 4,319855305 | 5,828198288 | 3,158054392 | 1       |
| ENSGALG00000002509 |            | 30,0871481  | 32,18952881 | 61,1232203  | 26,93140662 | 1       |
| ENSGALG00000002532 | GJA4       | 0,544399491 | 0,638100325 | 1,969673798 | 0,784806618 | 1       |
| ENSGALG00000002540 |            | 6,446932133 | 5,308050588 | 40,08364447 | 8,825438475 | 1       |
| ENSGALG00000002543 | CSGALNACT2 | 32,12663012 | 34,93337178 | 76,29195476 | 43,26033436 | 1       |
| ENSGALG00000002555 | RET        | 2,88163933  | 4,228435821 | 7,895631031 | 4,06619279  | 1       |
| ENSGALG00000002562 | ARAP3      | 1,48713749  | 1,131854243 | 19,88581577 | 2,017191883 | 1       |
| ENSGALG00000002594 | TFPI       | 1,818415284 | 2,178414033 | 30,95014095 | 1,96144887  | 1       |
| ENSGALG00000002598 | TPST1      | 110,6957744 | 124,8080538 | 194,3906783 | 111,9974286 | 1       |
| ENSGALG00000002623 | PCOLCE2    | 6,900390576 | 7,625754792 | 13,68975598 | 9,209524817 | 1       |
| ENSGALG00000002632 | CALCRL     | 12,01510153 | 10,78717477 | 32,20239461 | 13,53387588 | 1       |
| ENSGALG00000002646 | FAM171B    | 70,39669635 | 76,78219835 | 117,3361401 | 83,48810086 | 1       |
| ENSGALG00000002655 | ITGAV      | 34,70042214 | 37,88033757 | 56,07206538 | 41,54256787 | 1       |
| ENSGALG00000002704 |            | 1,560758451 | 1,645911429 | 3,272911068 | 1,63570101  | 1       |
| ENSGALG00000002763 | FRZB       | 88,08590473 | 101,8551818 | 118,1762783 | 90,87514056 | 1       |
| ENSGALG00000002816 | STK10      | 1,302638213 | 1,070607568 | 9,306934994 | 1,934117709 | 1       |
| ENSGALG00000002830 | NUDT3      | 82,47138192 | 83,39720868 | 119,0949223 | 90,87056175 | 1       |
| ENSGALG00000002863 | ERGIC1     | 200,1815036 | 199,8499674 | 251,621888  | 188,1263931 | 1       |
| ENSGALG00000002954 | MBTD1      | 61,91506849 | 61,41366817 | 80,11960497 | 59,8379799  | 1       |
| ENSGALG00000002993 | CA10       | 4,907630575 | 7,330232074 | 13,05830949 | 4,830057404 | 1       |
| ENSGALG00000003114 | NOG        | 8,459709423 | 11,93287775 | 23,8221868  | 8,350925143 | 1       |
| ENSGALG00000003149 |            | 3,188704926 | 3,828601125 | 6,728823346 | 4,067555236 | 1       |
| ENSGALG00000003323 | OSGIN1     | 0,150652789 | 0,306431517 | 2,76792484  | 0,600147405 | 1       |
| ENSGALG00000003339 | MTOR       | 32,72614893 | 33,27392871 | 40,05816094 | 32,03402147 | 1       |
| ENSGALG00000003353 | RAI14      | 72,22040829 | 61,3924759  | 156,0160059 | 63,07779452 | 1       |
| ENSGALG00000003437 |            | 1,140967301 | 0,975600437 | 7,404177579 | 1,755276738 | 1       |
| ENSGALG00000003456 | CA12       | 0,043477625 | 0,052506397 | 4,443271062 | 0,056186982 | 1       |
| ENSGALG00000003668 |            | 0,107991316 | 0,101421289 | 0,499834388 | 0,201779775 | 1       |
| ENSGALG00000003706 |            | 7,669767671 | 8,241795488 | 28,6640262  | 10,83001181 | 1       |
| ENSGALG00000004155 | MYOM3      | 0,565715899 | 0,738462272 | 1,297153697 | 0,505525313 | 1       |
| ENSGALG00000004221 |            | 0,270203292 | 0,285792101 | 18,79414137 | 0,190172822 | 1       |
| ENSGALG00000004273 | RALGPS2    | 68,26603769 | 74,39473921 | 93,44497048 | 67,30976616 | 1       |
| ENSGALG00000004306 | SYT12      | 2,605589645 | 4,144014971 | 15,45617568 | 4,186305684 | 1       |
| ENSGALG00000004376 | KCNJ2      | 3,77289362  | 4,959356504 | 22,31025244 | 3,944582    | 1       |
| ENSGALG00000004393 |            | 4,430270701 | 6,514512501 | 10,5028138  | 5,156954248 | 1       |
| ENSGALG00000004531 | PLOD1      | 39,43375984 | 39,16887142 | 53,49951129 | 39,85679447 | 1       |
| ENSGALG00000004569 | UNC5B      | 7,868192231 | 10,03498033 | 22,37566356 | 12,64304576 | 1       |
| ENSGALG00000004612 | MTHFR      | 29,88510462 | 33,82285398 | 48,61122399 | 33,33543084 | 1       |
| ENSGALG00000004624 |            | 38,51562207 | 38,74443918 | 46,92510617 | 37,97246389 | 1       |
| ENSGALG00000004638 |            | 12,39324598 | 12,9301946  | 17,06424419 | 12,4188215  | 1       |

|                    |          |             |             |             |             |   |
|--------------------|----------|-------------|-------------|-------------|-------------|---|
| ENSGALG00000004696 | LEO1     | 51,73562652 | 54,64381268 | 67,49391493 | 53,30887079 | 1 |
| ENSGALG00000004879 | SLC6A11  | 6,044456134 | 7,986360168 | 9,907299162 | 6,80721088  | 1 |
| ENSGALG00000004930 | HRH1     | 2,252570121 | 1,790119278 | 7,87682517  | 1,349179431 | 1 |
| ENSGALG00000005000 | COMTD1   | 48,07598474 | 44,35755518 | 397,3367537 | 85,33221268 | 1 |
| ENSGALG00000005061 | PPM1E    | 15,5883157  | 12,4158043  | 76,17698494 | 16,84323915 | 1 |
| ENSGALG00000005134 | ZSWIM8   | 11,30147215 | 11,70309029 | 15,86549961 | 11,59078122 | 1 |
| ENSGALG00000005160 | VMP1     | 97,80171612 | 94,91460927 | 126,6233829 | 94,36577445 | 1 |
| ENSGALG00000005209 |          | 0,978757944 | 1,181001848 | 116,1518425 | 3,250210874 | 1 |
| ENSGALG00000005347 | ADAMTS18 | 7,626809484 | 5,838020535 | 25,8863696  | 5,61477326  | 1 |
| ENSGALG00000005430 | ALS2CL   | 1,955531218 | 2,01749045  | 3,820475596 | 2,280218129 | 1 |
| ENSGALG00000005442 | PALMD    | 1,233769732 | 2,376997769 | 5,258268724 | 1,702027405 | 1 |
| ENSGALG00000005468 | SYNRG    | 31,68189573 | 33,65304843 | 40,16103869 | 31,72045473 | 1 |
| ENSGALG00000005476 | PTH1R    | 0,874654422 | 0,830470831 | 5,138549733 | 0,976037129 | 1 |
| ENSGALG00000005498 |          | 6,346864963 | 6,410134604 | 28,72716752 | 8,222793763 | 1 |
| ENSGALG00000005499 | IL17RD   | 42,29096857 | 36,47768079 | 270,3943487 | 91,41665589 | 1 |
| ENSGALG00000005519 | TLL2     | 1,410283264 | 2,247551296 | 22,60288502 | 3,669028574 | 1 |
| ENSGALG00000005610 | SLC44A3  | 5,452687132 | 6,470508823 | 10,61156478 | 5,917968895 | 1 |
| ENSGALG00000005619 |          | 12,91699497 | 13,14521332 | 36,29311148 | 14,78644626 | 1 |
| ENSGALG00000005785 |          | 6,273844084 | 6,527878689 | 9,293607737 | 4,778628942 | 1 |
| ENSGALG00000005805 | PLCD1    | 8,133157801 | 12,3694805  | 21,47493828 | 11,05897104 | 1 |
| ENSGALG00000005855 |          | 17,59991732 | 15,64179009 | 118,2991947 | 40,94877771 | 1 |
| ENSGALG00000006002 | WHAMM    | 15,4050577  | 16,68613201 | 22,65836529 | 17,34219926 | 1 |
| ENSGALG00000006072 | SCN10A   | 0,071733051 | 0,072511186 | 0,322233693 | 0,040260369 | 1 |
| ENSGALG00000006084 |          | 0,415711399 | 1,339960031 | 3,460295102 | 0,856058604 | 1 |
| ENSGALG00000006112 | SCN5A    | 0,916499676 | 0,661017755 | 4,51117604  | 0,605407018 | 1 |
| ENSGALG00000006121 | PIK3C2A  | 42,74947084 | 49,54970032 | 60,78554868 | 45,17039169 | 1 |
| ENSGALG00000006337 |          | 0,002439521 | 0,023624003 | 0,312529764 | 0,041882001 | 1 |
| ENSGALG00000006376 | TMC3     | 0,192169524 | 0,233676578 | 1,09689024  | 0,353408492 | 1 |
| ENSGALG00000006401 | OSBPL5   | 11,36431471 | 10,26220066 | 31,66422311 | 12,85811602 | 1 |
| ENSGALG00000006421 | SLC16A12 | 0,786470857 | 0,789157454 | 28,31054622 | 1,468096746 | 1 |
| ENSGALG00000006609 | EPHB1    | 70,32545848 | 78,56087564 | 89,8486204  | 58,97301751 | 1 |
| ENSGALG00000006652 | DIP2C    | 13,37555911 | 12,67551415 | 17,61300034 | 13,378876   | 1 |
| ENSGALG00000006808 | TSPAN6   | 84,8160072  | 92,4891866  | 182,1056518 | 96,16407149 | 1 |
| ENSGALG00000006975 |          | 35,48790893 | 37,00507441 | 45,63493758 | 29,37760443 | 1 |
| ENSGALG00000006995 | APOD     | 0,696051145 | 1,390188703 | 7,733888215 | 1,572610716 | 1 |
| ENSGALG00000006997 | BRINP1   | 3,499835162 | 4,356493158 | 11,27517561 | 3,348538768 | 1 |
| ENSGALG00000007039 |          | 40,28481666 | 45,9836234  | 79,80599717 | 45,70745825 | 1 |
| ENSGALG00000007069 |          | 1,998973396 | 3,269505285 | 4,779320231 | 2,74022749  | 1 |
| ENSGALG00000007113 |          | 4,572530679 | 5,629890394 | 15,02562976 | 4,089934281 | 1 |
| ENSGALG00000007171 | CIITA    | 0,022403266 | 0,204546083 | 2,706469378 | 0,728094044 | 1 |
| ENSGALG00000007206 |          | 0           | 0,022465315 | 0,940527994 | 0,230962067 | 1 |
| ENSGALG00000007218 | MB21D2   | 21,50353374 | 22,18131924 | 63,39535546 | 18,17572811 | 1 |
| ENSGALG00000007242 | SLITRK4  | 11,61340101 | 13,68905429 | 17,8729469  | 10,94148732 | 1 |
| ENSGALG00000007268 |          | 12,02218487 | 17,33922043 | 29,52538581 | 13,1036655  | 1 |
| ENSGALG00000007346 | KIAA1462 | 9,556019949 | 13,87679845 | 75,69402273 | 13,92754889 | 1 |
| ENSGALG00000007501 |          | 6,923403837 | 6,775032581 | 12,8684032  | 7,692808633 | 1 |
| ENSGALG00000007538 |          | 0           | 0,011572698 | 2,680467049 | 0,023686378 | 1 |
| ENSGALG00000007646 |          | 1,828426892 | 2,407614248 | 12,04323697 | 2,574591371 | 1 |
| ENSGALG00000007656 |          | 9,354467191 | 12,73350311 | 306,4981787 | 24,13865507 | 1 |
| ENSGALG00000007657 | CDX4     | 10,43751312 | 5,656329149 | 135,1902583 | 10,65993568 | 1 |
| ENSGALG00000007660 |          | 18,53508552 | 20,01450682 | 57,59481836 | 23,79729358 | 1 |
| ENSGALG00000007667 | GPR158   | 2,017006699 | 2,351089848 | 4,019170374 | 2,390691361 | 1 |
| ENSGALG00000007701 | B3GNT7   | 1,965758713 | 2,885006525 | 58,70594437 | 7,123195196 | 1 |
| ENSGALG00000007771 | FAM210B  | 48,42301262 | 61,59675671 | 141,9653945 | 54,87237005 | 1 |
| ENSGALG00000007786 | DOK5     | 1,639190441 | 2,831374722 | 12,89140399 | 2,824710311 | 1 |
| ENSGALG00000007940 |          | 0,298085716 | 0,405740152 | 3,03794633  | 0,245682446 | 1 |
| ENSGALG00000007952 | AMOT     | 42,59469668 | 43,129628   | 81,92458191 | 43,27930325 | 1 |
| ENSGALG00000007963 | NFATC2   | 0,197351415 | 0,379445389 | 3,998563902 | 0,912021662 | 1 |
| ENSGALG00000008118 |          | 11,21822805 | 8,858651443 | 37,96056253 | 7,261176994 | 1 |
| ENSGALG00000008195 | NPHP1    | 52,32037043 | 55,15367663 | 70,06251176 | 55,17279702 | 1 |
| ENSGALG00000008293 | SH3PXD2A | 4,963643686 | 5,106021399 | 7,660740968 | 4,819388759 | 1 |
| ENSGALG00000008318 | SLK      | 85,01647415 | 80,15010998 | 134,3520566 | 81,18806127 | 1 |

|                    |         |             |             |             |             |   |
|--------------------|---------|-------------|-------------|-------------|-------------|---|
| ENSGALG00000008353 |         | 4,025184036 | 3,680815167 | 16,66369921 | 4,874571991 | 1 |
| ENSGALG00000008469 | SPINT1  | 14,24665038 | 16,90480956 | 32,8484745  | 18,45751953 | 1 |
| ENSGALG00000008542 | ADD3    | 118,4151596 | 124,28577   | 157,6607813 | 123,3415266 | 1 |
| ENSGALG00000008581 |         | 10,16528829 | 6,061157018 | 256,373084  | 41,13464142 | 1 |
| ENSGALG00000008621 | NRP2    | 78,31928008 | 89,14932983 | 118,8571698 | 70,77451755 | 1 |
| ENSGALG00000008739 | FAM188A | 46,04693561 | 50,96110843 | 56,92147735 | 48,6759362  | 1 |
| ENSGALG00000008875 | PLCB1   | 4,345271238 | 4,743918313 | 14,04603032 | 6,225376121 | 1 |
| ENSGALG00000008890 | ADGRL4  | 0,129602088 | 0,092978733 | 0,996601503 | 0,083175824 | 1 |
| ENSGALG00000008905 | HABP2   | 0,266437294 | 0,48347075  | 6,734457842 | 0,981954515 | 1 |
| ENSGALG00000009170 | NCEH1   | 26,8945161  | 27,63392523 | 60,16087129 | 19,95188217 | 1 |
| ENSGALG00000009179 | TNFSF10 | 50,54952664 | 51,97607136 | 96,43379558 | 44,37200827 | 1 |
| ENSGALG00000009222 | FNDC3B  | 20,05392267 | 20,78387393 | 24,33913641 | 20,24031624 | 1 |
| ENSGALG00000009252 |         | 17,05340609 | 20,22552019 | 30,26838438 | 17,79052756 | 1 |
| ENSGALG00000009282 | ELMSAN1 | 12,79207245 | 10,87027045 | 43,26764769 | 12,23866375 | 1 |
| ENSGALG00000009300 | NUMB    | 37,95931361 | 39,65737919 | 52,66309106 | 40,50552035 | 1 |
| ENSGALG00000009360 | CAPN2   | 3,497797582 | 4,055116565 | 9,127908666 | 4,85175942  | 1 |
| ENSGALG00000009415 | SMOC1   | 117,4087959 | 134,7914352 | 180,6575257 | 94,49588202 | 1 |
| ENSGALG00000009450 | DUSP10  | 9,354175589 | 11,43364627 | 21,919628   | 10,97128745 | 1 |
| ENSGALG00000009562 |         | 71,61834554 | 77,27651814 | 93,73781016 | 58,03501792 | 1 |
| ENSGALG00000009567 | TLL1    | 12,75490022 | 14,9239491  | 30,19675472 | 13,74189903 | 1 |
| ENSGALG00000009667 | MFAP3L  | 4,900753944 | 6,755229067 | 18,92590259 | 7,235188798 | 1 |
| ENSGALG00000009693 | CPXM2   | 0,297057574 | 0,224259756 | 1,916995035 | 0,375685436 | 1 |
| ENSGALG00000009704 | CHST15  | 26,42019968 | 31,60061585 | 300,8079085 | 35,72264945 | 1 |
| ENSGALG00000009740 | RASGRP1 | 2,238442875 | 3,221407126 | 8,304577968 | 3,876544109 | 1 |
| ENSGALG00000009752 | C1GALT1 | 73,87944835 | 76,00031211 | 88,11179224 | 77,6483376  | 1 |
| ENSGALG00000009850 | NOVA1   | 65,62071803 | 72,5812928  | 91,8483665  | 60,49260852 | 1 |
| ENSGALG00000009855 | TBC1D9  | 35,32107704 | 35,40997725 | 52,56579067 | 36,25236136 | 1 |
| ENSGALG00000009920 | COCH    | 13,26044931 | 11,28208934 | 38,09312731 | 9,926593491 | 1 |
| ENSGALG00000009947 | PLEKHH2 | 8,548346442 | 7,655850005 | 20,90561351 | 8,219735522 | 1 |
| ENSGALG00000010010 | RHOQ    | 22,36249765 | 32,86035501 | 57,1305441  | 31,25736751 | 1 |
| ENSGALG00000010061 | LRBA    | 13,57799133 | 15,84454033 | 19,19400383 | 15,01651499 | 1 |
| ENSGALG00000010148 |         | 0,376485353 | 0,303044356 | 1,090711174 | 0,276420272 | 1 |
| ENSGALG00000010156 |         | 0,484158088 | 0,407906519 | 1,056535994 | 0,478788157 | 1 |
| ENSGALG00000010163 | LGR5    | 29,22401237 | 42,84673911 | 58,12291645 | 29,33576971 | 1 |
| ENSGALG00000010204 | KCNC2   | 8,315391818 | 9,598554626 | 14,43598051 | 9,193014079 | 1 |
| ENSGALG00000010224 |         | 0,29053295  | 0,779126106 | 7,883361459 | 0,88877587  | 1 |
| ENSGALG00000010258 | LTBP2   | 1,700141471 | 1,689599283 | 7,343564576 | 2,281390244 | 1 |
| ENSGALG00000010282 | TMEM63B | 53,53998682 | 52,35379756 | 67,85386895 | 55,3585158  | 1 |
| ENSGALG00000010318 | TMED10  | 380,0260003 | 378,4420008 | 456,2386739 | 383,0242366 | 1 |
| ENSGALG00000010412 | WWTR1   | 7,372640458 | 8,212018771 | 15,65426723 | 9,207581713 | 1 |
| ENSGALG00000010435 | RASGRP3 | 0,951722698 | 1,288332265 | 16,04572445 | 2,667849388 | 1 |
| ENSGALG00000010468 | ISM2    | 6,961603369 | 5,451403991 | 28,88288749 | 9,016585179 | 1 |
| ENSGALG00000010522 |         | 52,19125685 | 45,4437284  | 88,95246599 | 53,90163476 | 1 |
| ENSGALG00000010642 | IRF2    | 14,12465929 | 15,27261891 | 20,26270283 | 12,94760591 | 1 |
| ENSGALG00000010683 |         | 1,286887376 | 2,082891848 | 4,318730895 | 2,217138302 | 1 |
| ENSGALG00000010688 | SHC3    | 0,377086245 | 0,473231752 | 1,28457644  | 0,656462583 | 1 |
| ENSGALG00000010692 | LRP8    | 17,33417611 | 14,1459726  | 39,14255891 | 19,74069674 | 1 |
| ENSGALG00000010707 | GPR68   | 0           | 0,159372632 | 1,201854665 | 0,204226743 | 1 |
| ENSGALG00000010785 | ACOT11  | 3,3120391   | 3,449588553 | 7,445190708 | 4,169283534 | 1 |
| ENSGALG00000010926 |         | 1,182613457 | 1,250155615 | 4,861891125 | 1,667707956 | 1 |
| ENSGALG00000011099 | FAP     | 0,524872973 | 0,627940647 | 8,568804109 | 0,852104076 | 1 |
| ENSGALG00000011110 |         | 1,049280017 | 1,070578153 | 3,569578228 | 1,155450113 | 1 |
| ENSGALG00000011120 |         | 0,903887543 | 1,717288396 | 2,968494683 | 1,501450921 | 1 |
| ENSGALG00000011148 |         | 10,04557421 | 13,49083348 | 31,35368024 | 9,031119595 | 1 |
| ENSGALG00000011172 |         | 7,443800272 | 6,657256083 | 14,36492915 | 6,634505832 | 1 |
| ENSGALG00000011207 | DUSP6   | 38,54581524 | 33,84315846 | 198,3618888 | 73,6726962  | 1 |
| ENSGALG00000011236 | BEGAIN  | 0,363396332 | 1,174831529 | 2,353729205 | 0,884245626 | 1 |
| ENSGALG00000011246 |         | 34,4951174  | 37,48548023 | 47,02695891 | 34,71936867 | 1 |
| ENSGALG00000011258 |         | 115,2808442 | 105,6819299 | 225,5885638 | 117,6950123 | 1 |
| ENSGALG00000011336 |         | 0,100777952 | 0,154515943 | 0,745110987 | 0,176260961 | 1 |
| ENSGALG00000011376 | ANKRD9  | 5,699927441 | 6,47582585  | 10,76381249 | 5,70463788  | 1 |
| ENSGALG00000011439 |         | 11,48455465 | 11,97057423 | 28,13859794 | 12,9402475  | 1 |

|                    |          |             |             |             |             |   |
|--------------------|----------|-------------|-------------|-------------|-------------|---|
| ENSGALG00000011468 | IGFBP5   | 22,18372906 | 31,8043152  | 67,63240972 | 24,25782653 | 1 |
| ENSGALG00000011548 | PPP1R13B | 17,59096224 | 18,42868364 | 27,31810324 | 20,71203786 | 1 |
| ENSGALG00000011562 | PARK2    | 2,307166008 | 2,209921812 | 14,10410652 | 1,800517372 | 1 |
| ENSGALG00000011581 | KIF26A   | 4,38085147  | 8,865650561 | 49,95121099 | 16,48311585 | 1 |
| ENSGALG00000011609 |          | 9,843500616 | 8,417625726 | 40,27301602 | 8,233732841 | 1 |
| ENSGALG00000011618 | ADSSL1   | 8,786398246 | 10,75524319 | 18,1647197  | 11,87110001 | 1 |
| ENSGALG00000011623 | ADAMTS3  | 24,331848   | 27,29215191 | 78,31157876 | 35,78867135 | 1 |
| ENSGALG00000011707 |          | 53,24117172 | 52,60615779 | 73,60572574 | 52,46461184 | 1 |
| ENSGALG00000011762 | UBA6     | 45,15145647 | 45,49374679 | 54,61323703 | 46,15736387 | 1 |
| ENSGALG00000011770 | UMPS     | 129,7844633 | 135,257901  | 207,8820378 | 147,8994428 | 1 |
| ENSGALG00000011867 | SERHL2   | 29,43272669 | 33,34712098 | 71,24407539 | 29,95176995 | 1 |
| ENSGALG00000011940 |          | 2,58677773  | 5,2650269   | 34,93790074 | 11,23222133 | 1 |
| ENSGALG00000012018 | UGT8     | 3,339674913 | 5,868867271 | 29,87840982 | 10,482522   | 1 |
| ENSGALG00000012051 |          | 4,041058882 | 2,27262952  | 31,35683641 | 3,147836465 | 1 |
| ENSGALG00000012106 | SCTR     | 0,647796476 | 1,062662762 | 4,974582478 | 0,728529092 | 1 |
| ENSGALG00000012439 |          | 5,987859862 | 8,057194256 | 15,71567866 | 7,213637245 | 1 |
| ENSGALG00000012454 | CYTH4    | 0,040933627 | 0,148295635 | 0,646186586 | 0,122442754 | 1 |
| ENSGALG00000012522 | PVALB    | 0,10415029  | 0,018320357 | 1,845669062 | 0,264205542 | 1 |
| ENSGALG00000012533 |          | 82,14235353 | 89,9220224  | 161,7487773 | 106,8315371 | 1 |
| ENSGALG00000012608 | DAPK1    | 18,63601716 | 17,25242431 | 24,89907156 | 19,04902754 | 1 |
| ENSGALG00000012623 |          | 0,308723784 | 0,17685494  | 2,783031501 | 0,236507182 | 1 |
| ENSGALG00000012635 |          | 2,956578448 | 4,062704068 | 12,89063246 | 3,64967825  | 1 |
| ENSGALG00000012732 | PHACTR1  | 1,002723787 | 0,92758825  | 5,310014441 | 0,874633616 | 1 |
| ENSGALG00000012808 | CDYL     | 18,02096582 | 21,34276206 | 37,17353321 | 21,75666775 | 1 |
| ENSGALG00000012848 |          | 20,64815843 | 19,22874436 | 38,64533737 | 23,70889337 | 1 |
| ENSGALG00000012849 | SLC37A3  | 25,5841736  | 29,25564121 | 46,57867282 | 31,70186837 | 1 |
| ENSGALG00000012911 | SYT10    | 1,659882445 | 2,809814019 | 5,964646057 | 2,833486186 | 1 |
| ENSGALG00000012979 |          | 22,57549197 | 22,92713118 | 34,79249726 | 24,59961237 | 1 |
| ENSGALG00000012998 | WNT5B    | 32,51568668 | 42,44877134 | 79,13605981 | 43,44051816 | 1 |
| ENSGALG00000013033 |          | 0,623034671 | 0,523981207 | 6,611512329 | 0,624842166 | 1 |
| ENSGALG00000013102 | COBL     | 1,89987265  | 2,53428906  | 12,26309687 | 3,628837952 | 1 |
| ENSGALG00000013149 | MOCOS    | 0,31264351  | 0,69552403  | 1,148089973 | 0,526605797 | 1 |
| ENSGALG00000013406 | EOGT     | 8,979738398 | 9,102324177 | 13,64010251 | 10,0250873  | 1 |
| ENSGALG00000013548 | GZMA     | 0,244325018 | 0,143724945 | 1,250994806 | 0,095859771 | 1 |
| ENSGALG00000013624 |          | 2,042343298 | 4,425049521 | 70,07747071 | 5,032989524 | 1 |
| ENSGALG00000013661 | MICU3    | 16,86990908 | 18,35601379 | 24,39035699 | 18,72105289 | 1 |
| ENSGALG00000013683 | ARID1B   | 50,21288267 | 47,56895592 | 91,55652092 | 53,76612448 | 1 |
| ENSGALG00000013892 | MAP3K5   | 3,106959802 | 3,891469812 | 7,477861463 | 3,385152426 | 1 |
| ENSGALG00000014159 | PACSIN2  | 46,93642045 | 52,69096243 | 231,699989  | 66,05762406 | 1 |
| ENSGALG00000014165 |          | 34,4949156  | 36,21634446 | 46,38287449 | 35,66651524 | 1 |
| ENSGALG00000014213 | PRR5     | 45,61960191 | 49,63409703 | 60,32943821 | 40,69527126 | 1 |
| ENSGALG00000014337 | NWD2     | 4,063259347 | 3,87414171  | 6,001585157 | 3,902325985 | 1 |
| ENSGALG00000014370 |          | 25,6946956  | 26,45741685 | 32,9477035  | 27,52616136 | 1 |
| ENSGALG00000014688 | ZYX      | 73,08300226 | 79,10890291 | 102,6158311 | 80,01024875 | 1 |
| ENSGALG00000014783 |          | 22,3498316  | 24,871629   | 42,37641705 | 29,08458804 | 1 |
| ENSGALG00000014823 |          | 0           | 0,035377845 | 0,977269445 | 0,046829328 | 1 |
| ENSGALG00000014852 |          | 58,83953299 | 69,54541567 | 178,8283916 | 76,07766834 | 1 |
| ENSGALG00000014855 |          | 27,82040525 | 38,69420984 | 56,11193291 | 36,63572912 | 1 |
| ENSGALG00000014860 | YES1     | 130,3824873 | 130,6854913 | 192,983834  | 128,1750395 | 1 |
| ENSGALG00000014864 |          | 3,731602592 | 5,046367263 | 9,359766476 | 4,111091192 | 1 |
| ENSGALG00000014866 |          | 1161,822033 | 1014,002441 | 2650,648004 | 1063,272464 | 1 |
| ENSGALG00000014872 | FGF10    | 1,077530612 | 0,935843353 | 31,13159693 | 6,221341059 | 1 |
| ENSGALG00000014877 | EMB      | 13,70340987 | 18,5752455  | 42,8108232  | 19,61514892 | 1 |
| ENSGALG00000014907 | DCBLD1   | 14,02744527 | 19,4714576  | 31,49340589 | 18,13536669 | 1 |
| ENSGALG00000014930 | ENC1     | 32,6260464  | 23,96935622 | 95,15822903 | 28,5198255  | 1 |
| ENSGALG00000014953 | RWDD1    | 34,3211322  | 35,70428677 | 48,85056151 | 36,89366799 | 1 |
| ENSGALG00000014957 | WDR1     | 149,3387297 | 141,564327  | 241,426839  | 140,1462197 | 1 |
| ENSGALG00000014961 |          | 0,030063775 | 0,212281951 | 0,53262582  | 0,159553166 | 1 |
| ENSGALG00000014983 | F2R      | 11,99732554 | 10,51644411 | 30,61968372 | 11,21982229 | 1 |
| ENSGALG00000014984 | F2RL1    | 9,191228695 | 7,297000019 | 60,18915078 | 7,334530663 | 1 |
| ENSGALG00000014994 | CRHBP    | 0,094206422 | 0,123018797 | 8,155312142 | 0,069432825 | 1 |
| ENSGALG00000015008 | ZNF366   | 0,025612818 | 0,007984965 | 0,218726746 | 0,02805032  | 1 |

|                    |          |             |             |             |             |   |
|--------------------|----------|-------------|-------------|-------------|-------------|---|
| ENSGALG00000015028 |          | 5,215749923 | 6,301235219 | 16,40492276 | 7,825223421 | 1 |
| ENSGALG00000015033 | REV3L    | 14,90469289 | 16,2960558  | 20,42678903 | 15,73038983 | 1 |
| ENSGALG00000015089 | GAP43    | 10,73590963 | 9,303884931 | 33,04526973 | 8,030676006 | 1 |
| ENSGALG00000015208 | ROR2     | 17,52597629 | 20,97201143 | 36,98791655 | 21,6549491  | 1 |
| ENSGALG00000015252 | ST3GAL6  | 50,15692337 | 52,54417622 | 62,67006181 | 44,72893    | 1 |
| ENSGALG00000015256 | PAM      | 37,6976856  | 29,97280604 | 96,16475159 | 36,54825142 | 1 |
| ENSGALG00000015332 | CPLX1    | 1,265996124 | 4,716193333 | 92,44153266 | 18,97429343 | 1 |
| ENSGALG00000015358 | MYH15    | 2,502155814 | 2,562264429 | 24,52524418 | 2,753567038 | 1 |
| ENSGALG00000015388 |          | 0,998528448 | 2,80672025  | 22,77458166 | 7,945924483 | 1 |
| ENSGALG00000015439 | SLC44A1  | 37,1490751  | 42,22953839 | 47,91821194 | 36,92039081 | 1 |
| ENSGALG00000015440 |          | 0,649690061 | 0,632601394 | 1,775464964 | 0,785617529 | 1 |
| ENSGALG00000015458 | ILDR2    | 95,9535283  | 99,09522051 | 139,284134  | 104,0358316 | 1 |
| ENSGALG00000015624 | VCAN     | 33,86551135 | 34,75318733 | 94,61693612 | 47,34830969 | 1 |
| ENSGALG00000015634 |          | 0,190327277 | 0,320177513 | 1,214767371 | 0,43293815  | 1 |
| ENSGALG00000015665 | SH3BP2   | 3,286250973 | 2,895344261 | 9,524027287 | 4,083976177 | 1 |
| ENSGALG00000015826 | HTR1E    | 0,33449219  | 0,44224444  | 11,45369572 | 1,027953514 | 1 |
| ENSGALG00000015896 |          | 6,388186822 | 7,197999605 | 12,51939522 | 6,10029628  | 1 |
| ENSGALG00000015947 |          | 0,048261531 | 0,051324674 | 8,627025826 | 1,412173952 | 1 |
| ENSGALG00000015975 |          | 46,39913828 | 46,69943177 | 77,97746804 | 37,87795667 | 1 |
| ENSGALG00000016074 |          | 2,965663767 | 3,518415951 | 4,36951983  | 3,22716103  | 1 |
| ENSGALG00000016102 |          | 1,474592182 | 2,407557081 | 8,858325248 | 2,452322765 | 1 |
| ENSGALG00000016140 | FAM3B    | 1,345511674 | 1,561374658 | 14,90793732 | 1,339776747 | 1 |
| ENSGALG00000016145 |          | 0,594265981 | 1,380102509 | 16,360371   | 2,19880009  | 1 |
| ENSGALG00000016226 |          | 82,42631993 | 87,8153227  | 97,22152217 | 82,97244346 | 1 |
| ENSGALG00000016236 |          | 79,83962807 | 81,6981472  | 94,32375099 | 74,79813666 | 1 |
| ENSGALG00000016297 | HCRTR2   | 0,172470075 | 0,189519273 | 0,91709899  | 0,109463532 | 1 |
| ENSGALG00000016377 | PXDN     | 48,44717284 | 47,31975564 | 221,1364094 | 53,85481487 | 1 |
| ENSGALG00000016431 | Pax5B    | 0,759670645 | 1,184984006 | 24,88772514 | 0,76701086  | 1 |
| ENSGALG00000016470 | KCNS3    | 0,820548787 | 1,835471231 | 21,82469461 | 5,812307253 | 1 |
| ENSGALG00000016537 | SCML2    | 23,96103489 | 29,8195471  | 50,09057341 | 29,94459128 | 1 |
| ENSGALG00000016602 |          | 3,664177334 | 3,917626255 | 12,58470849 | 4,88155337  | 1 |
| ENSGALG00000016630 | EXTL3    | 78,945634   | 78,16521266 | 100,6801361 | 82,53544774 | 1 |
| ENSGALG00000016736 | CYFIP1   | 115,4849451 | 117,5058947 | 151,3780148 | 125,0449365 | 1 |
| ENSGALG00000016751 |          | 74,54427214 | 79,14506937 | 102,3489998 | 80,62212588 | 1 |
| ENSGALG00000016754 |          | 6,519633751 | 9,835468627 | 20,77499853 | 9,953787953 | 1 |
| ENSGALG00000016768 | LONRF2   | 44,67796838 | 42,46064416 | 63,91927301 | 44,69491354 | 1 |
| ENSGALG00000016781 | MAP4K4   | 80,99823221 | 79,95663486 | 120,0802219 | 86,66172865 | 1 |
| ENSGALG00000016783 |          | 0,807775429 | 0,850085852 | 114,9806394 | 2,530944487 | 1 |
| ENSGALG00000016784 |          | 0,558045454 | 0,472553521 | 7,610637786 | 1,133090803 | 1 |
| ENSGALG00000016785 | IL1RL1   | 0,070474547 | 0           | 1,971779618 | 0,162809382 | 1 |
| ENSGALG00000016834 | MCF2L    | 4,225420748 | 4,647949468 | 6,579407696 | 4,100185155 | 1 |
| ENSGALG00000016835 |          | 19,91459988 | 25,58593002 | 33,27889918 | 23,30715898 | 1 |
| ENSGALG00000016883 | DOCK9    | 10,45434421 | 10,83646735 | 15,52539363 | 10,77548298 | 1 |
| ENSGALG00000016893 |          | 30,0481437  | 30,75098399 | 36,9917239  | 30,50750363 | 1 |
| ENSGALG00000016899 | DCT      | 0,082019435 | 0,067986713 | 0,424223435 | 0,074974082 | 1 |
| ENSGALG00000016906 | SPRY2    | 22,79491815 | 23,80423911 | 369,1836197 | 101,4167028 | 1 |
| ENSGALG00000016911 | RNF219   | 35,29870957 | 34,99094267 | 44,02485713 | 33,4703359  | 1 |
| ENSGALG00000016998 | LPAR6    | 5,959033195 | 5,246978391 | 17,44700786 | 7,250724714 | 1 |
| ENSGALG00000017044 | TRPC4    | 0,533180653 | 0,692407894 | 1,395530609 | 0,748381254 | 1 |
| ENSGALG00000017091 | FLT1     | 1,390041035 | 0,693832705 | 8,294413787 | 1,492735256 | 1 |
| ENSGALG00000017135 | CRYL1    | 4,9261885   | 4,709864357 | 10,17588307 | 4,813391563 | 1 |
| ENSGALG00000017179 | PDGFD    | 2,173029014 | 3,505795831 | 14,26690549 | 3,894835223 | 1 |
| ENSGALG00000017186 |          | 69,04285483 | 68,94924482 | 88,45648678 | 73,22242114 | 1 |
| ENSGALG00000017242 | FZD4     | 4,01523892  | 5,003599185 | 20,09846171 | 6,618181415 | 1 |
| ENSGALG00000017244 | PRSS23   | 12,28501908 | 11,45283797 | 64,02403712 | 13,46351005 | 1 |
| ENSGALG00000017714 |          | 2,458678092 | 3,270301188 | 9,373616504 | 4,3477783   | 1 |
| ENSGALG00000018479 |          | 19,30607593 | 27,19022439 | 34,32889124 | 17,26565929 | 1 |
| ENSGALG00000019261 |          | 6,423634206 | 5,898459466 | 17,86083615 | 5,032292518 | 1 |
| ENSGALG00000019397 | CERK     | 65,45684989 | 75,63715367 | 102,1461158 | 52,57771362 | 1 |
| ENSGALG00000019426 |          | 1,895961953 | 1,778982812 | 8,767179842 | 1,135546894 | 1 |
| ENSGALG00000019552 | SERPINB2 | 0,03276452  | 0,012366785 | 0,305019782 | 0,020558652 | 1 |
| ENSGALG00000019716 | KRT20    | 0,427331711 | 0,54228415  | 2,142286477 | 0,421447442 | 1 |

|                    |         |             |             |             |             |   |
|--------------------|---------|-------------|-------------|-------------|-------------|---|
| ENSGALG00000020057 | PIGF    | 47,49119487 | 53,61856839 | 63,6504531  | 43,06229201 | 1 |
| ENSGALG00000020359 | SIX6    | 0,147864328 | 0,28328832  | 7,275442564 | 0,245244412 | 1 |
| ENSGALG00000020723 |         | 23,95654484 | 27,95652952 | 51,89848439 | 27,20320324 | 1 |
| ENSGALG00000021238 |         | 3,377343555 | 3,609177279 | 6,58959715  | 4,12451232  | 1 |
| ENSGALG00000021879 |         | 0,060680129 | 0,02783627  | 4,532687997 | 0,361707989 | 1 |
| ENSGALG00000022871 |         | 9,149877167 | 11,59069382 | 20,94301968 | 8,951752944 | 1 |
| ENSGALG00000022962 |         | 0,005547593 | 0           | 1,110790954 | 0,021210214 | 1 |
| ENSGALG00000023355 | TMEM154 | 0,274198999 | 0,242777653 | 1,595469388 | 0,503883204 | 1 |
| ENSGALG00000023379 | F2RL2   | 0,699357483 | 0,206509379 | 17,20987384 | 0,770639649 | 1 |
| ENSGALG00000023406 |         | 7,189218224 | 27,88560585 | 237,0573377 | 66,09046748 | 1 |
| ENSGALG00000023430 |         | 0,204871896 | 0,107896168 | 5,766235294 | 0,103839874 | 1 |
| ENSGALG00000023510 | ERP29   | 244,8276365 | 243,7579874 | 286,6547438 | 250,6109926 | 1 |
| ENSGALG00000023521 | ADRA2A  | 2,990826686 | 6,4207327   | 33,46692465 | 9,885743021 | 1 |
| ENSGALG00000023581 |         | 2,293508573 | 3,632286312 | 6,833722653 | 3,344298943 | 1 |
| ENSGALG00000024083 | C8orf4  | 24,35008397 | 20,56522548 | 90,61964264 | 18,98861546 | 1 |
| ENSGALG00000025723 |         | 0,558060232 | 0,679196686 | 0,810932422 | 0,573634828 | 1 |
| ENSGALG00000025773 |         | 12,25494928 | 11,44694026 | 30,15620585 | 9,759339323 | 1 |
| ENSGALG00000025941 | RGS20   | 0,992958806 | 1,120198002 | 4,961879868 | 1,076166451 | 1 |
| ENSGALG00000026262 |         | 23,02651413 | 19,44179408 | 89,23902687 | 31,06609278 | 1 |
| ENSGALG00000026366 |         | 0,032450796 | 0,03560783  | 0,297910888 | 0,062257621 | 1 |
| ENSGALG00000026518 | RUNDC3A | 10,57114969 | 16,46754486 | 25,12660637 | 14,66077777 | 1 |
| ENSGALG00000026557 | PGF     | 1,365378945 | 1,285576654 | 6,812213801 | 1,989316648 | 1 |
| ENSGALG00000026582 |         | 6,114977984 | 5,267516926 | 12,31174473 | 6,045225829 | 1 |
| ENSGALG00000026663 | CX3CL1  | 0,28585624  | 0,517672331 | 5,224016511 | 0,810407917 | 1 |
| ENSGALG00000026753 |         | 4,373338809 | 4,733385198 | 6,354129053 | 4,718191959 | 1 |
| ENSGALG00000026763 |         | 5,105466174 | 4,675186082 | 12,43728303 | 5,145242205 | 1 |
| ENSGALG00000026790 | DMRT2   | 2,44415194  | 3,013071402 | 9,651534911 | 4,741219823 | 1 |
| ENSGALG00000026892 |         | 0,630709919 | 0,49426779  | 2,669713204 | 0,343635403 | 1 |
| ENSGALG00000026970 |         | 19,9958411  | 29,56495965 | 47,72673087 | 27,76473883 | 1 |
| ENSGALG00000026995 | RHOG    | 2,125612682 | 1,771546724 | 5,966320997 | 2,254397519 | 1 |
| ENSGALG00000027133 |         | 0,276818664 | 0,334539577 | 1,403416102 | 0,364180584 | 1 |
| ENSGALG00000027210 |         | 0,626776305 | 0,767218066 | 2,251672836 | 0,943311678 | 1 |
| ENSGALG00000027497 |         | 4,239074936 | 4,349860411 | 10,12003694 | 4,862962086 | 1 |
| ENSGALG00000027864 | NFKBIA  | 5,145580181 | 5,317887462 | 7,594774216 | 5,76461762  | 1 |
| ENSGALG00000027885 | C4orf19 | 0,006715072 | 0,052136259 | 0,371881758 | 0,049775385 | 1 |
| ENSGALG00000028046 | INSIG2  | 47,56660897 | 56,64100654 | 107,3362206 | 50,7535001  | 1 |
| ENSGALG00000028047 | RHOV    | 2,271837176 | 2,028232459 | 7,468783549 | 2,647132976 | 1 |
| ENSGALG00000028250 | ANKRD22 | 0,112085424 | 0,162263291 | 0,899150004 | 0,041047018 | 1 |
| ENSGALG00000028267 |         | 76,90546701 | 75,83970622 | 103,3050563 | 76,29588931 | 1 |
| ENSGALG00000028291 |         | 96,11071203 | 93,78119127 | 144,7372696 | 92,58940493 | 1 |
| ENSGALG00000028294 | VWA5B2  | 14,51886882 | 15,87519135 | 30,51008951 | 18,72172895 | 1 |
| ENSGALG00000028637 |         | 37,10791538 | 39,94856328 | 50,36322451 | 41,0166067  | 1 |
| ENSGALG00000028708 |         | 24,99318737 | 36,73989626 | 54,90494637 | 28,8846325  | 1 |
| ENSGALG00000028938 |         | 0,513837926 | 0,624776649 | 0,839919222 | 0,435033808 | 1 |
| ENSGALG00000029175 | EFNB2   | 30,56530828 | 27,21275717 | 113,8041773 | 33,97932717 | 1 |
| ENSGALG00000000195 | SVCT2   | 19,10462588 | 17,48116214 | 25,91142744 | 17,63462036 | 2 |
| ENSGALG00000000208 | MCC     | 25,83310361 | 20,09476945 | 33,82276296 | 23,91037382 | 2 |
| ENSGALG00000000258 |         | 75,85689269 | 54,92413434 | 95,52174596 | 62,32390544 | 2 |
| ENSGALG00000000275 | KCTD9   | 37,75610815 | 32,89373192 | 45,75008795 | 35,24739442 | 2 |
| ENSGALG00000000332 |         | 72,56124041 | 58,37784284 | 85,08368566 | 66,53036384 | 2 |
| ENSGALG00000000346 |         | 75,70929419 | 72,18519081 | 95,30895247 | 71,18874501 | 2 |
| ENSGALG00000000388 |         | 173,5309683 | 83,88403469 | 265,5077681 | 88,686351   | 2 |
| ENSGALG00000000680 |         | 65,55002426 | 35,12675538 | 98,37170682 | 37,34008803 | 2 |
| ENSGALG00000000936 |         | 18,6039239  | 13,94226071 | 27,03075663 | 11,68456073 | 2 |
| ENSGALG00000001000 |         | 903,1481891 | 710,3094654 | 1580,638121 | 839,8439333 | 2 |
| ENSGALG00000001003 | SEPN1   | 54,28402873 | 50,00244607 | 70,19927743 | 47,23413232 | 2 |
| ENSGALG00000001169 | CRB2    | 129,1232018 | 81,31040842 | 173,364492  | 61,90998035 | 2 |
| ENSGALG00000001192 |         | 56,80326116 | 47,24213542 | 66,68178678 | 43,96666792 | 2 |
| ENSGALG00000001276 | HOXB9   | 440,9241521 | 286,4552462 | 833,8511125 | 381,4973378 | 2 |
| ENSGALG00000001363 | MYBBP1A | 108,2631392 | 74,57137633 | 129,5761289 | 87,68932285 | 2 |
| ENSGALG00000001608 | UNC5D   | 1,806421005 | 1,336857976 | 5,395223323 | 1,082125149 | 2 |
| ENSGALG00000001645 | KCNT1   | 3,342845418 | 2,419654306 | 6,945138399 | 2,085754068 | 2 |

|                    |          |             |             |             |             |   |
|--------------------|----------|-------------|-------------|-------------|-------------|---|
| ENSGALG00000001656 |          | 187,6401815 | 129,4403167 | 226,396159  | 121,0670172 | 2 |
| ENSGALG00000001749 | ACSBG2   | 25,77749834 | 18,04184176 | 33,32440771 | 18,2584482  | 2 |
| ENSGALG00000001768 | TENM2    | 13,34961314 | 7,569539699 | 19,32663023 | 7,163569584 | 2 |
| ENSGALG00000001957 |          | 30,17853095 | 28,11283549 | 41,98257618 | 29,43069139 | 2 |
| ENSGALG00000002119 | C16orf62 | 53,57445126 | 51,96391471 | 66,2690369  | 50,53612293 | 2 |
| ENSGALG00000002316 | NUBP2    | 79,87979134 | 66,76426362 | 113,9079487 | 71,91374142 | 2 |
| ENSGALG00000002397 | PSPH     | 16,90500002 | 11,13674451 | 38,37209435 | 14,53627012 | 2 |
| ENSGALG00000002443 | FBXL16   | 5,482262774 | 3,393627985 | 10,2747505  | 3,721226607 | 2 |
| ENSGALG00000002460 |          | 169,5656604 | 134,6549735 | 199,9940187 | 147,1796955 | 2 |
| ENSGALG00000002461 |          | 85,54594955 | 74,49743937 | 129,1652031 | 74,457145   | 2 |
| ENSGALG00000002714 | TMEM132C | 81,17568898 | 53,4953987  | 178,5879937 | 49,72398397 | 2 |
| ENSGALG00000002726 | KIF1B    | 37,34066731 | 35,19418972 | 52,6551427  | 32,73497754 | 2 |
| ENSGALG00000002923 |          | 42,50041281 | 25,78454685 | 58,32063392 | 24,5275742  | 2 |
| ENSGALG00000002985 | UTP18    | 59,80283029 | 50,99843338 | 74,38386445 | 58,7986555  | 2 |
| ENSGALG00000003052 | AGFG1    | 53,98350241 | 52,12101214 | 63,9794555  | 53,31865967 | 2 |
| ENSGALG00000003078 | MMD      | 166,6104847 | 155,0883677 | 202,3376044 | 148,475486  | 2 |
| ENSGALG00000003180 |          | 107,8427517 | 81,65197474 | 140,4725058 | 96,80702055 | 2 |
| ENSGALG00000003277 | SUZ12    | 67,78173578 | 55,86030796 | 80,4002124  | 62,8663404  | 2 |
| ENSGALG00000003295 |          | 11,95332143 | 9,200781695 | 16,90039539 | 8,047388377 | 2 |
| ENSGALG00000003375 |          | 0,555521759 | 0,504517259 | 0,641921993 | 0,451150123 | 2 |
| ENSGALG00000003391 | EIF2AK1  | 120,3525644 | 98,69879665 | 149,048697  | 85,56996995 | 2 |
| ENSGALG00000003427 | USP3     | 144,6869467 | 126,2563974 | 186,8105836 | 108,1291213 | 2 |
| ENSGALG00000003430 | PMS2     | 83,93336261 | 66,63608403 | 99,6035854  | 60,47076563 | 2 |
| ENSGALG00000003566 | SMURF2   | 22,13122327 | 21,05696082 | 28,29312846 | 20,18762732 | 2 |
| ENSGALG00000003739 |          | 107,7186679 | 79,57676443 | 217,3446885 | 92,92358891 | 2 |
| ENSGALG00000003767 | NKD1     | 64,58229372 | 56,04338743 | 82,66219062 | 54,31127427 | 2 |
| ENSGALG00000003835 |          | 95,26245909 | 80,97210783 | 135,4218017 | 94,66924992 | 2 |
| ENSGALG00000003957 |          | 7,497005362 | 7,280862747 | 12,32775655 | 4,077169463 | 2 |
| ENSGALG00000004049 | ITFG1    | 143,3658699 | 143,1696704 | 169,0452251 | 126,3388766 | 2 |
| ENSGALG00000004121 | LPAR4    | 57,41190777 | 51,21366709 | 73,35902376 | 56,01058859 | 2 |
| ENSGALG00000004132 |          | 313,0280743 | 222,5345954 | 396,1457648 | 232,4516201 | 2 |
| ENSGALG00000004144 |          | 230,9295811 | 165,493935  | 322,5375425 | 219,6317991 | 2 |
| ENSGALG00000004169 |          | 52,0041871  | 45,80321214 | 71,82848643 | 48,04815439 | 2 |
| ENSGALG00000004231 | IFNLR1   | 13,20283795 | 12,15973039 | 22,07165879 | 11,62321498 | 2 |
| ENSGALG00000004416 | TTC19    | 35,18587556 | 33,81562749 | 46,08392978 | 33,45574377 | 2 |
| ENSGALG00000004435 | RAB27A   | 37,01217138 | 30,70100511 | 46,40397428 | 36,08556376 | 2 |
| ENSGALG00000004474 | PLEKHF1  | 16,35912847 | 14,33700972 | 22,89893142 | 16,04362022 | 2 |
| ENSGALG00000004813 | IARS     | 121,2613046 | 91,77804842 | 145,089873  | 101,0949477 | 2 |
| ENSGALG00000005123 | WNT7A    | 12,40158553 | 7,623339638 | 21,37318743 | 7,362852482 | 2 |
| ENSGALG00000005177 |          | 102,6782147 | 98,37619348 | 120,4338593 | 98,08612871 | 2 |
| ENSGALG00000005243 | PPP3CB   | 90,43009538 | 80,11505572 | 110,9801319 | 75,05008011 | 2 |
| ENSGALG00000005425 | OGT      | 218,3232715 | 170,7793164 | 269,4024715 | 191,9762176 | 2 |
| ENSGALG00000005427 |          | 2,231810001 | 1,699165441 | 2,481654149 | 1,214604019 | 2 |
| ENSGALG00000005601 |          | 0,874226757 | 0,788269723 | 1,394307851 | 0,68739779  | 2 |
| ENSGALG00000005685 | KSR1     | 28,99559087 | 18,12035724 | 39,2301589  | 17,04233962 | 2 |
| ENSGALG00000005689 | Pax-2    | 2,427170557 | 1,41090904  | 9,598393861 | 1,637819447 | 2 |
| ENSGALG00000005723 |          | 20,77746675 | 15,4473937  | 28,34501666 | 15,42480292 | 2 |
| ENSGALG00000005796 | XBP1     | 178,2861977 | 149,6817159 | 240,7969177 | 155,1233149 | 2 |
| ENSGALG00000005815 | TMEM41B  | 103,3957725 | 81,41002257 | 126,0115268 | 83,74442495 | 2 |
| ENSGALG00000005845 | SLC7A5   | 122,4599338 | 88,23427206 | 160,3761058 | 103,8001208 | 2 |
| ENSGALG00000005854 | CLUH     | 53,12207763 | 46,43056255 | 64,52154409 | 48,66611182 | 2 |
| ENSGALG00000005945 |          | 312,5580735 | 266,4501752 | 377,6849137 | 289,237717  | 2 |
| ENSGALG00000005966 | SEC61A1  | 146,4192137 | 135,8133269 | 172,2380178 | 140,0010865 | 2 |
| ENSGALG00000006080 | GPC4     | 336,1866881 | 277,2326888 | 398,7191432 | 255,9354884 | 2 |
| ENSGALG00000006138 |          | 5,3558423   | 4,222816208 | 9,559136283 | 4,692914386 | 2 |
| ENSGALG00000006237 | PKN2     | 94,14155442 | 80,04499622 | 133,7485665 | 89,13597808 | 2 |
| ENSGALG00000006254 | ERCC6    | 20,09113345 | 17,29890431 | 24,82822974 | 19,87584242 | 2 |
| ENSGALG00000006256 |          | 81,30960437 | 70,77595812 | 104,1957411 | 69,99809839 | 2 |
| ENSGALG00000006336 |          | 24,78170301 | 21,0855019  | 32,50165931 | 24,28317002 | 2 |
| ENSGALG00000006378 |          | 46,64016235 | 43,92374135 | 60,27231414 | 45,47990755 | 2 |
| ENSGALG00000006437 |          | 21,70370986 | 15,95524381 | 28,04172555 | 17,79255113 | 2 |
| ENSGALG00000006797 | ADARB2   | 2,386525484 | 1,723097368 | 5,609955946 | 1,217344116 | 2 |



|                    |          |             |             |             |             |   |
|--------------------|----------|-------------|-------------|-------------|-------------|---|
| ENSGALG00000006822 | PCDH19   | 27,11782022 | 17,17899723 | 78,54913552 | 16,55189982 | 2 |
| ENSGALG00000006856 | CD151    | 66,08781237 | 56,83548982 | 81,90386525 | 57,64667081 | 2 |
| ENSGALG00000006872 | PISD     | 43,47551418 | 38,78352232 | 70,45275748 | 40,42254893 | 2 |
| ENSGALG00000006895 | CEP131   | 90,4838243  | 72,05921603 | 111,7343496 | 78,83214694 | 2 |
| ENSGALG00000006935 |          | 41,19849281 | 36,85474382 | 50,28356686 | 36,31503506 | 2 |
| ENSGALG00000006939 | PFKP     | 159,5195891 | 114,2592094 | 248,2482576 | 153,3129457 | 2 |
| ENSGALG00000006971 |          | 39,6698917  | 31,40577651 | 49,95181554 | 34,88964426 | 2 |
| ENSGALG00000007141 | LRRK1    | 8,471065321 | 7,23115594  | 11,52135294 | 7,124193969 | 2 |
| ENSGALG00000007145 | ITGB1    | 273,7290161 | 235,6454154 | 355,8809593 | 269,2892165 | 2 |
| ENSGALG00000007234 | CLCN5    | 26,22166298 | 22,62208897 | 33,75980899 | 24,31186251 | 2 |
| ENSGALG00000007555 | CCND1    | 306,4125901 | 154,2072849 | 365,1007316 | 180,3456931 | 2 |
| ENSGALG00000007703 |          | 9,24001434  | 8,395210751 | 12,59696711 | 8,329025499 | 2 |
| ENSGALG00000007870 |          | 87,32940421 | 79,94947931 | 110,2506191 | 70,91164374 | 2 |
| ENSGALG00000007992 | GGA3     | 36,45435135 | 33,68958392 | 46,79638773 | 32,15023613 | 2 |
| ENSGALG00000008014 | CEBPB    | 4,510096151 | 2,905838226 | 10,42101228 | 4,244775839 | 2 |
| ENSGALG00000008088 | ACSL4    | 42,77845399 | 39,53431922 | 53,52228442 | 40,19984773 | 2 |
| ENSGALG00000008132 |          | 65,00574864 | 54,88816517 | 78,94598152 | 54,53613107 | 2 |
| ENSGALG00000008240 | CFLAR    | 18,56362706 | 16,85330063 | 24,63252397 | 15,72359014 | 2 |
| ENSGALG00000008265 |          | 99,00016091 | 72,4970655  | 124,8646432 | 83,07442811 | 2 |
| ENSGALG00000008352 |          | 2,250088005 | 1,0956429   | 4,791149948 | 1,598463212 | 2 |
| ENSGALG00000008376 | EIF2B5   | 94,27576083 | 72,47419873 | 115,9006191 | 78,67487542 | 2 |
| ENSGALG00000008420 | CAND2    | 23,37386731 | 21,50334329 | 30,87205611 | 22,23847698 | 2 |
| ENSGALG00000008491 |          | 17,15532317 | 13,9477056  | 36,83972093 | 14,33742773 | 2 |
| ENSGALG00000008547 |          | 64,24771593 | 51,30719206 | 82,19229622 | 44,61001661 | 2 |
| ENSGALG00000008615 |          | 5,06223098  | 3,526819344 | 8,116738936 | 3,342214797 | 2 |
| ENSGALG00000008705 |          | 70,28714953 | 55,76149858 | 84,361465   | 62,76428579 | 2 |
| ENSGALG00000008811 | SLC1A4   | 58,52949193 | 43,75140023 | 86,41435492 | 45,37141837 | 2 |
| ENSGALG00000008837 | PELI1    | 94,23917029 | 88,93657106 | 118,7910083 | 87,71875282 | 2 |
| ENSGALG00000008848 |          | 228,2464595 | 192,5521067 | 285,6860563 | 202,9251398 | 2 |
| ENSGALG00000008893 |          | 0,788890271 | 0,471371295 | 2,736222886 | 0,392092612 | 2 |
| ENSGALG00000008918 | LAMP5    | 14,93803939 | 12,88300339 | 33,54629897 | 9,821656942 | 2 |
| ENSGALG00000009156 | CDAN1    | 24,72426506 | 21,37975812 | 38,04864069 | 23,8875669  | 2 |
| ENSGALG00000009157 |          | 87,96461416 | 76,74072672 | 108,7893047 | 79,4696583  | 2 |
| ENSGALG00000009325 |          | 294,7081113 | 263,852235  | 362,0594636 | 288,1555786 | 2 |
| ENSGALG00000009381 |          | 32,68110455 | 28,74970946 | 55,76103582 | 28,68002235 | 2 |
| ENSGALG00000009405 | GRIA2    | 1,407370493 | 1,108824914 | 2,875596002 | 1,012364018 | 2 |
| ENSGALG00000009428 | SUSD6    | 57,11791895 | 42,67061228 | 75,42226656 | 43,93842172 | 2 |
| ENSGALG00000009448 | IFRD1    | 202,5579686 | 184,5575928 | 256,5170811 | 193,8512693 | 2 |
| ENSGALG00000009503 | RAB3GAP2 | 27,58247884 | 24,32314054 | 39,58475158 | 27,79781709 | 2 |
| ENSGALG00000009530 | PDZRN4   | 4,501893374 | 4,232231688 | 8,897453929 | 3,14255931  | 2 |
| ENSGALG00000009532 | GXYLT1   | 80,28520746 | 50,71712672 | 113,1318587 | 48,13296544 | 2 |
| ENSGALG00000009540 | YAF2     | 59,24038791 | 44,15994271 | 76,99125086 | 41,14854067 | 2 |
| ENSGALG00000009598 | EPRS     | 197,6861501 | 158,8121803 | 232,2356108 | 176,423736  | 2 |
| ENSGALG00000009748 | ASNS     | 97,82806709 | 83,16578594 | 131,8122178 | 78,83074589 | 2 |
| ENSGALG00000009782 | NAA15    | 266,9481403 | 207,4047491 | 327,0135056 | 235,6097075 | 2 |
| ENSGALG00000009899 |          | 236,5885982 | 203,9108633 | 284,3763821 | 211,3515889 | 2 |
| ENSGALG00000009932 | THADA    | 22,14429481 | 19,57605019 | 29,02730205 | 16,89609973 | 2 |
| ENSGALG00000009992 | ARHGAP5  | 58,77117318 | 59,03006064 | 73,92712    | 52,73589474 | 2 |
| ENSGALG00000010185 | HSPA4L   | 163,6669681 | 145,5240912 | 193,6623799 | 158,5908649 | 2 |
| ENSGALG00000010344 |          | 156,9519341 | 147,9541769 | 185,7383997 | 153,6414155 | 2 |
| ENSGALG00000010481 | CMPK1    | 87,69769168 | 80,49136199 | 107,5540033 | 88,01504488 | 2 |
| ENSGALG00000010536 | FAF1     | 88,30370611 | 72,66469157 | 110,2520086 | 71,68965841 | 2 |
| ENSGALG00000010603 |          | 84,1905846  | 68,02532034 | 109,3218398 | 73,68783444 | 2 |
| ENSGALG00000010609 | NDUFAF7  | 58,29146836 | 51,96812842 | 72,7689523  | 57,11232085 | 2 |
| ENSGALG00000010975 | TMTC2    | 23,82759321 | 19,13077263 | 32,54483622 | 21,60811044 | 2 |
| ENSGALG00000010976 | CCDC126  | 54,6027561  | 47,2667848  | 70,21267556 | 52,96789525 | 2 |
| ENSGALG00000011045 |          | 26,46809802 | 23,19298715 | 40,20404704 | 23,42656319 | 2 |
| ENSGALG00000011101 | URB2     | 25,42984582 | 20,93888932 | 34,16483045 | 25,23812695 | 2 |
| ENSGALG00000011162 | CYP46A1  | 13,41648813 | 11,27861549 | 19,78883987 | 12,85367535 | 2 |
| ENSGALG00000011228 | WARS     | 106,1162631 | 99,35563125 | 133,5656722 | 91,79714635 | 2 |
| ENSGALG00000011280 | EEA1     | 45,16187273 | 37,63511378 | 56,03426363 | 37,5455685  | 2 |
| ENSGALG00000011295 | SOCS2    | 35,2007449  | 27,48311534 | 54,87659139 | 27,05575114 | 2 |



|                    |         |             |             |             |             |   |
|--------------------|---------|-------------|-------------|-------------|-------------|---|
| ENSGALG00000011319 | ADGRL3  | 45,1852269  | 32,57841533 | 77,39214523 | 28,90106474 | 2 |
| ENSGALG00000011351 |         | 1685,984803 | 1051,80178  | 2090,592418 | 1455,900582 | 2 |
| ENSGALG00000011357 | VEZT    | 46,17530033 | 43,8453212  | 57,83328907 | 44,85175026 | 2 |
| ENSGALG00000011388 | RABGGTB | 110,4609778 | 75,06399545 | 135,3567109 | 76,64938861 | 2 |
| ENSGALG00000011400 | USP44   | 105,190674  | 89,81710894 | 130,7144947 | 91,51130572 | 2 |
| ENSGALG00000011449 |         | 22,58118535 | 18,20250459 | 33,94025319 | 22,81520682 | 2 |
| ENSGALG00000011464 | EIF5    | 917,8237588 | 741,5110635 | 1254,948905 | 864,0505476 | 2 |
| ENSGALG00000011541 | BIN1    | 42,772136   | 38,21688698 | 55,05676669 | 37,86617878 | 2 |
| ENSGALG00000011596 |         | 57,99322619 | 44,45105626 | 70,97049646 | 50,67792225 | 2 |
| ENSGALG00000011630 | GLI2    | 38,42268045 | 36,6914924  | 48,8882817  | 35,92337252 | 2 |
| ENSGALG00000011643 | UTP20   | 49,30168208 | 34,35447527 | 68,15857187 | 39,08059154 | 2 |
| ENSGALG00000011708 | MYLK    | 42,12023537 | 23,42722651 | 64,28850589 | 17,96485165 | 2 |
| ENSGALG00000012012 |         | 37,18646392 | 31,88793184 | 65,7915782  | 35,088643   | 2 |
| ENSGALG00000012135 | ATF4    | 797,1581709 | 658,7569115 | 982,7650311 | 706,8909729 | 2 |
| ENSGALG00000012138 |         | 509,5484881 | 456,9957633 | 634,8041273 | 493,2502814 | 2 |
| ENSGALG00000012147 | DDX18   | 65,05833895 | 45,55953755 | 80,75087614 | 54,70066068 | 2 |
| ENSGALG00000012224 |         | 12,79412136 | 10,47045165 | 26,42294332 | 11,28060466 | 2 |
| ENSGALG00000012278 |         | 69,38557328 | 35,10562561 | 151,1486425 | 26,90469823 | 2 |
| ENSGALG00000012394 | NID2    | 68,69887592 | 50,72697074 | 103,5972114 | 58,40743145 | 2 |
| ENSGALG00000012412 | MTHFD1L | 68,14080099 | 40,88211832 | 86,10529775 | 42,0382293  | 2 |
| ENSGALG00000012447 |         | 30,18390029 | 29,50018616 | 37,62561165 | 24,8779874  | 2 |
| ENSGALG00000012594 | NTRK2   | 2,037686782 | 1,161148992 | 4,803911879 | 0,826826974 | 2 |
| ENSGALG00000012726 |         | 731,3536309 | 562,0189803 | 1152,278498 | 610,6379714 | 2 |
| ENSGALG00000012807 |         | 41,90128094 | 38,20539641 | 52,18993579 | 41,4992427  | 2 |
| ENSGALG00000012814 | PXDC1   | 18,15321703 | 15,98836675 | 24,69297093 | 13,47136744 | 2 |
| ENSGALG00000012834 | AKR1D1  | 11,22123762 | 9,012546744 | 17,6164965  | 9,658495181 | 2 |
| ENSGALG00000012916 | DROSHA  | 22,62795344 | 20,36463746 | 27,36524709 | 21,85837675 | 2 |
| ENSGALG00000012927 |         | 0,883855398 | 0,584154188 | 2,63363293  | 0,355129019 | 2 |
| ENSGALG00000013124 | FHOD3   | 15,42123161 | 11,36420449 | 27,34521932 | 13,3362274  | 2 |
| ENSGALG00000013203 |         | 24,74101095 | 18,16871784 | 30,60325872 | 21,74233169 | 2 |
| ENSGALG00000013480 |         | 63,83136272 | 43,0080344  | 89,59781528 | 60,13279899 | 2 |
| ENSGALG00000013861 | TNFAIP3 | 10,67839855 | 9,456256342 | 14,89948611 | 7,83500739  | 2 |
| ENSGALG00000014343 |         | 2,461528107 | 1,903728583 | 5,19294882  | 1,881861539 | 2 |
| ENSGALG00000014419 |         | 28,48257578 | 26,61598867 | 39,61862765 | 24,2985378  | 2 |
| ENSGALG00000014426 | KPNA1   | 75,53504815 | 58,7970706  | 92,09409276 | 65,46068843 | 2 |
| ENSGALG00000014686 | FBN2    | 3,824183353 | 3,617210217 | 5,312013174 | 3,28868843  | 2 |
| ENSGALG00000014727 | PDE4D   | 3,095516476 | 2,120314733 | 9,004244594 | 1,906866262 | 2 |
| ENSGALG00000014784 | MAST4   | 7,644433311 | 6,829537967 | 10,49021956 | 7,439951494 | 2 |
| ENSGALG00000014873 | GJA1    | 151,5200503 | 125,8535441 | 213,8081133 | 139,1697079 | 2 |
| ENSGALG00000014902 |         | 36,12871703 | 36,02307188 | 48,16761796 | 31,1982202  | 2 |
| ENSGALG00000015049 |         | 107,1047214 | 88,92587671 | 135,8651695 | 102,4480149 | 2 |
| ENSGALG00000015112 |         | 52,46535646 | 48,47995695 | 77,60078191 | 38,76419637 | 2 |
| ENSGALG00000015164 |         | 8,124039618 | 6,253772744 | 15,92231741 | 8,079666445 | 2 |
| ENSGALG00000015472 |         | 103,7455883 | 84,8260084  | 125,5639489 | 82,46251332 | 2 |
| ENSGALG00000015765 |         | 57,24314739 | 44,13731219 | 76,00962273 | 51,54508175 | 2 |
| ENSGALG00000015862 |         | 174,4258517 | 150,9505279 | 265,4828154 | 159,1555857 | 2 |
| ENSGALG00000015887 | URB1    | 25,51642297 | 20,47718015 | 41,57109807 | 25,13000945 | 2 |
| ENSGALG00000015912 |         | 32,16222318 | 29,58832844 | 40,98127953 | 26,04493072 | 2 |
| ENSGALG00000015940 |         | 20,73939007 | 19,85946192 | 29,04560533 | 14,93146904 | 2 |
| ENSGALG00000016412 | MBOAT2  | 20,66710203 | 20,80239859 | 26,79137108 | 15,68219706 | 2 |
| ENSGALG00000016455 | GREB1   | 71,30258407 | 44,76556849 | 171,8842869 | 40,7988828  | 2 |
| ENSGALG00000016480 | SDC1    | 67,79712381 | 46,12962808 | 101,6542603 | 65,96909209 | 2 |
| ENSGALG00000016808 | RANBP2  | 88,68408088 | 76,82428287 | 126,4454672 | 83,37223599 | 2 |
| ENSGALG00000016875 |         | 35,81511404 | 23,39580851 | 81,48141489 | 21,24280635 | 2 |
| ENSGALG00000016896 | ABCC4   | 9,804323199 | 7,015685475 | 14,63344086 | 7,987146561 | 2 |
| ENSGALG00000016897 | GPR180  | 25,35505379 | 21,30681925 | 31,82543062 | 22,00243895 | 2 |
| ENSGALG00000016910 | RBM26   | 141,5608071 | 114,5852063 | 174,753134  | 120,2734436 | 2 |
| ENSGALG00000017085 | SLC7A1  | 40,05394599 | 35,00050584 | 54,14362264 | 38,81530443 | 2 |
| ENSGALG00000017111 | NUP58   | 63,43269188 | 54,90711803 | 79,68018034 | 60,76739727 | 2 |
| ENSGALG00000017365 |         | 22,49317964 | 17,18921742 | 33,78900494 | 20,82699363 | 2 |
| ENSGALG00000017388 |         | 186,1814132 | 172,046714  | 268,9548589 | 178,5764003 | 2 |
| ENSGALG00000017462 | FNIP1   | 23,16041033 | 20,29852756 | 34,80619268 | 20,97040204 | 2 |

|                    |         |             |             |             |             |   |
|--------------------|---------|-------------|-------------|-------------|-------------|---|
| ENSGALG00000019077 |         | 75,80953752 | 63,82999065 | 101,13045   | 49,73846401 | 2 |
| ENSGALG00000019622 | TRIM71  | 63,53466997 | 45,08282347 | 138,6372475 | 59,01429912 | 2 |
| ENSGALG00000019961 | SLC18B1 | 94,7023836  | 82,41511543 | 144,636966  | 86,89618913 | 2 |
| ENSGALG00000020479 |         | 23,15151259 | 19,80281907 | 35,36804246 | 21,72259355 | 2 |
| ENSGALG00000020805 | LRRC8D  | 52,23662484 | 47,43227859 | 70,9545852  | 43,87669915 | 2 |
| ENSGALG00000021316 |         | 95,97879893 | 77,14187045 | 118,2758942 | 74,31764513 | 2 |
| ENSGALG00000023451 | TRPM7   | 25,75064391 | 21,92560329 | 34,73493332 | 22,8366183  | 2 |
| ENSGALG00000023576 | PIM3    | 38,39240852 | 36,6823612  | 50,24199049 | 36,47779083 | 2 |
| ENSGALG00000024039 |         | 104,7252252 | 86,46498974 | 126,7964154 | 101,8972811 | 2 |
| ENSGALG00000025770 |         | 5,489257369 | 3,00959702  | 12,02421921 | 5,106431368 | 2 |
| ENSGALG00000025884 | NABP1   | 53,416184   | 46,44733288 | 68,89014188 | 48,27093752 | 2 |
| ENSGALG00000026349 |         | 276,236352  | 197,8659478 | 354,8447655 | 217,6076426 | 2 |
| ENSGALG00000027316 |         | 2,126519018 | 1,150096401 | 4,599057408 | 0,899918777 | 2 |
| ENSGALG00000027342 |         | 54,55996923 | 43,14565226 | 88,63782029 | 46,00922333 | 2 |
| ENSGALG00000027355 | TPBG    | 77,04597047 | 65,11404966 | 96,88531936 | 76,00938707 | 2 |
| ENSGALG00000027389 | RGS7BP  | 16,07367378 | 12,09558999 | 26,33652515 | 15,7130332  | 2 |
| ENSGALG00000027757 | ARL4A   | 92,36112237 | 89,07729168 | 139,8864616 | 67,39567749 | 2 |
| ENSGALG00000028462 |         | 49,20550825 | 40,59815974 | 63,79574475 | 48,48730827 | 2 |
| ENSGALG00000028821 | GLIPR2  | 73,84703902 | 51,69185499 | 185,78976   | 66,36412003 | 2 |
| ENSGALG00000029023 | DMRTB1  | 0,460922202 | 0,311878344 | 1,17310912  | 0,418308344 | 2 |
| ENSGALG00000000054 |         | 40,61041039 | 77,77927106 | 101,7475053 | 79,46683091 | 3 |
| ENSGALG00000000162 |         | 0,462119365 | 0,938839881 | 1,64917459  | 0,88469459  | 3 |
| ENSGALG00000000385 |         | 31,22124771 | 34,99404406 | 41,45690236 | 38,58983564 | 3 |
| ENSGALG00000000409 | CHMP7   | 79,5962766  | 87,42800269 | 94,16850493 | 90,97109387 | 3 |
| ENSGALG00000000546 |         | 13,1839576  | 15,33846461 | 17,00256672 | 16,22873609 | 3 |
| ENSGALG00000000721 | SLC41A1 | 10,56410509 | 14,67315988 | 25,86101352 | 19,0181628  | 3 |
| ENSGALG00000001007 |         | 249,8579466 | 266,9325144 | 356,1755387 | 297,3682242 | 3 |
| ENSGALG00000001482 |         | 39,02660104 | 42,05429417 | 46,83086881 | 45,01081844 | 3 |
| ENSGALG00000001789 |         | 5,660481882 | 5,998946978 | 8,128074203 | 6,887258106 | 3 |
| ENSGALG00000001962 | PTBP1   | 232,0447099 | 243,7695722 | 332,3908518 | 271,6208432 | 3 |
| ENSGALG00000002232 |         | 38,27382102 | 41,1639609  | 46,66833375 | 42,91091967 | 3 |
| ENSGALG00000002248 |         | 31,30319367 | 32,96247972 | 49,67058945 | 40,65598095 | 3 |
| ENSGALG00000002294 | SEMA6A  | 10,49550142 | 13,58348745 | 24,74662011 | 18,10914393 | 3 |
| ENSGALG00000002326 |         | 1,47250781  | 2,63934996  | 4,3086282   | 2,825363581 | 3 |
| ENSGALG00000002335 | DOCK3   | 1,86448435  | 2,175929741 | 3,65664367  | 2,786015113 | 3 |
| ENSGALG00000002336 |         | 31,11744712 | 33,42002163 | 37,20470924 | 36,29167307 | 3 |
| ENSGALG00000002521 |         | 18,85761021 | 20,11966762 | 24,33563548 | 21,95444037 | 3 |
| ENSGALG00000002604 |         | 56,3890493  | 58,74501369 | 73,02098131 | 67,097638   | 3 |
| ENSGALG00000002745 |         | 150,7994546 | 155,5390263 | 180,6431172 | 172,3193816 | 3 |
| ENSGALG00000003113 | RGS14   | 32,70926878 | 38,37080551 | 45,95420135 | 39,64318938 | 3 |
| ENSGALG00000003488 |         | 1,062824324 | 2,489829504 | 4,41900121  | 3,4655683   | 3 |
| ENSGALG00000003634 | PTEN    | 109,6705257 | 112,8873555 | 130,5075766 | 116,9977413 | 3 |
| ENSGALG00000003701 | SGMS1   | 9,258518873 | 11,10229042 | 15,94820162 | 13,26938247 | 3 |
| ENSGALG00000003948 | ALAS1   | 49,59705625 | 55,47941093 | 71,59274829 | 59,09107457 | 3 |
| ENSGALG00000004088 | FNBP1   | 24,99237284 | 26,63166615 | 41,69591151 | 33,84795116 | 3 |
| ENSGALG00000004158 |         | 10,55351282 | 11,6407991  | 18,6163799  | 13,95560906 | 3 |
| ENSGALG00000004181 |         | 10,65424926 | 12,03452833 | 16,95695499 | 13,00094636 | 3 |
| ENSGALG00000004384 |         | 69,61318883 | 72,98146284 | 91,46967536 | 84,65324587 | 3 |
| ENSGALG00000004509 |         | 973,1657851 | 1201,316866 | 1361,543225 | 1311,496279 | 3 |
| ENSGALG00000004517 | PARP3   | 6,608038224 | 7,4623483   | 10,339109   | 8,753186004 | 3 |
| ENSGALG00000004573 | LRRC8A  | 0,06745578  | 0,071659756 | 0,107430357 | 0,088247902 | 3 |
| ENSGALG00000004594 | CD74    | 4,406632912 | 8,750656652 | 24,51781075 | 14,099464   | 3 |
| ENSGALG00000004661 |         | 55,81884913 | 71,36370724 | 89,93526626 | 84,78952034 | 3 |
| ENSGALG00000004730 |         | 2,547946628 | 4,415127922 | 9,113776156 | 6,91193394  | 3 |
| ENSGALG00000004917 |         | 2,896199012 | 3,859495387 | 6,644848881 | 4,974527218 | 3 |
| ENSGALG00000004974 | PPARG   | 1,096913427 | 1,387820745 | 3,376628365 | 2,480137643 | 3 |
| ENSGALG00000005310 |         | 4,865705062 | 6,154572974 | 9,226338957 | 6,706461454 | 3 |
| ENSGALG00000005492 |         | 10,69479144 | 14,25428111 | 24,12257422 | 16,1669692  | 3 |
| ENSGALG00000005678 | FLNB    | 60,41912172 | 63,75180733 | 77,98540804 | 71,20030379 | 3 |
| ENSGALG00000005692 |         | 3,071738847 | 4,652874224 | 7,830445668 | 5,084013812 | 3 |
| ENSGALG00000005990 |         | 0,702479687 | 0,971890089 | 2,092257816 | 1,181810364 | 3 |
| ENSGALG00000006097 | PLXNA1  | 90,9441087  | 93,67817119 | 112,3883703 | 102,2276242 | 3 |

|                    |          |             |             |             |             |   |
|--------------------|----------|-------------|-------------|-------------|-------------|---|
| ENSGALG00000006252 | LMO4     | 39,86339327 | 44,78129011 | 86,70760634 | 62,88011361 | 3 |
| ENSGALG00000006258 | SPOCK1   | 35,25706314 | 52,38093264 | 93,08564779 | 55,08217348 | 3 |
| ENSGALG00000006314 |          | 2,490008645 | 4,28813785  | 7,168503958 | 6,122938793 | 3 |
| ENSGALG00000006417 | SEC24A   | 58,74346813 | 64,91074036 | 75,01570455 | 66,74698384 | 3 |
| ENSGALG00000006638 | GRIK4    | 10,90795756 | 15,65522755 | 23,06474952 | 17,01050771 | 3 |
| ENSGALG00000006717 |          | 0,341376117 | 3,858277819 | 12,25143393 | 5,62632686  | 3 |
| ENSGALG00000006786 |          | 9,374384568 | 13,921691   | 19,00994587 | 16,68642534 | 3 |
| ENSGALG00000006845 |          | 2,670363578 | 3,667942238 | 4,464215057 | 3,687958638 | 3 |
| ENSGALG00000006928 |          | 28,56711841 | 31,59803573 | 37,31258837 | 32,05630269 | 3 |
| ENSGALG00000007140 | NRP1     | 6,786804779 | 9,937661813 | 29,18904165 | 20,3705717  | 3 |
| ENSGALG00000007608 | ARHGEF9  | 19,95586878 | 33,81382649 | 49,630279   | 46,62145769 | 3 |
| ENSGALG00000007707 | TRAPPC4  | 89,44703604 | 93,8442147  | 110,2275432 | 97,87185693 | 3 |
| ENSGALG00000007712 | MYO1B    | 15,61469896 | 20,14680824 | 26,22598793 | 22,24150912 | 3 |
| ENSGALG00000007920 | PRR5L    | 4,129042771 | 4,972105698 | 7,776312534 | 6,401104872 | 3 |
| ENSGALG00000008018 | SNAI1    | 4,838614652 | 6,837750638 | 10,0616924  | 8,716434475 | 3 |
| ENSGALG00000008128 |          | 75,28877718 | 82,09362626 | 103,3431878 | 93,65315249 | 3 |
| ENSGALG00000008206 | TESC     | 3,628035071 | 6,771511577 | 8,739719175 | 7,526555407 | 3 |
| ENSGALG00000008321 | RNPEPL1  | 22,85721363 | 26,24567137 | 33,01671824 | 30,40006594 | 3 |
| ENSGALG00000008359 | CD93     | 1,29957602  | 1,606526404 | 2,626230481 | 1,994368504 | 3 |
| ENSGALG00000008445 | SLC24A3  | 7,111549609 | 8,166183777 | 13,26231133 | 11,30603962 | 3 |
| ENSGALG00000008623 | TOR4A    | 2,885819993 | 3,8654735   | 7,453674406 | 5,093186098 | 3 |
| ENSGALG00000009145 |          | 1,464711516 | 1,626807682 | 2,784818386 | 2,107621671 | 3 |
| ENSGALG00000009293 | CHN1     | 67,90118322 | 74,31595236 | 82,89622495 | 76,74118835 | 3 |
| ENSGALG00000009393 |          | 6,562399308 | 15,29420916 | 43,36617594 | 24,96798456 | 3 |
| ENSGALG00000009808 |          | 1,416304393 | 2,421872238 | 5,557291922 | 2,900189483 | 3 |
| ENSGALG00000010005 | EPAS1    | 1,665911612 | 3,648797813 | 8,298542118 | 6,247343231 | 3 |
| ENSGALG00000010035 | NR3C2    | 6,203251658 | 9,632638993 | 13,68730791 | 9,212635965 | 3 |
| ENSGALG00000010081 | SH3D19   | 9,151663444 | 12,27542336 | 21,57827913 | 14,7478447  | 3 |
| ENSGALG00000010090 | FAM160A1 | 2,972923275 | 4,146500246 | 6,55742234  | 5,035528514 | 3 |
| ENSGALG00000010186 |          | 26,1218641  | 34,11416012 | 41,89387746 | 40,73222649 | 3 |
| ENSGALG00000010518 |          | 0,144840281 | 0,417602932 | 0,617619694 | 0,379300378 | 3 |
| ENSGALG00000010597 |          | 4,611954486 | 9,57844156  | 19,361201   | 10,00647113 | 3 |
| ENSGALG00000010780 |          | 14,90096854 | 16,74023252 | 20,06717072 | 17,00357201 | 3 |
| ENSGALG00000010910 |          | 5,56043356  | 11,09159137 | 18,79138106 | 10,94754966 | 3 |
| ENSGALG00000010996 | IRF2BP2  | 74,78507418 | 89,5496145  | 142,7037833 | 109,2878448 | 3 |
| ENSGALG00000011061 |          | 0           | 0,089561338 | 0,194908996 | 0,087418642 | 3 |
| ENSGALG00000011076 | SYNE3    | 0,555939022 | 0,853639426 | 2,736597554 | 1,544551691 | 3 |
| ENSGALG00000011220 | SLC25A29 | 13,82485106 | 20,4490233  | 37,69585477 | 30,16838999 | 3 |
| ENSGALG00000011232 |          | 8,944661229 | 10,28962659 | 16,59653933 | 12,22287995 | 3 |
| ENSGALG00000011241 | RFTN1    | 4,68880177  | 5,893184053 | 7,360556398 | 6,707841258 | 3 |
| ENSGALG00000011550 |          | 40,28733517 | 55,05082442 | 67,35622718 | 54,65736176 | 3 |
| ENSGALG00000011613 |          | 4,739203641 | 5,310547233 | 9,592133476 | 7,686518403 | 3 |
| ENSGALG00000011831 | ANKRD50  | 13,06309751 | 25,09232183 | 32,26143246 | 25,9987912  | 3 |
| ENSGALG00000011963 | PRDM5    | 2,076763979 | 3,308086443 | 4,532414832 | 3,751882733 | 3 |
| ENSGALG00000012033 | SGSM3    | 12,06891416 | 14,05699702 | 17,1981993  | 14,96637778 | 3 |
| ENSGALG00000012111 | TMEM37   | 3,030173772 | 3,743044977 | 7,331132284 | 5,289018921 | 3 |
| ENSGALG00000012407 | LRP1B    | 0,189428611 | 0,330664455 | 0,574724991 | 0,367586865 | 3 |
| ENSGALG00000012449 | MBD5     | 36,89274386 | 42,54116552 | 53,76802751 | 44,82551839 | 3 |
| ENSGALG00000012462 | KIF5C    | 65,21507153 | 73,27025091 | 90,38041221 | 78,71948215 | 3 |
| ENSGALG00000012739 | HIVEP1   | 15,82020811 | 17,77656476 | 21,4826725  | 19,34743987 | 3 |
| ENSGALG00000012850 | RAB19    | 3,884293705 | 4,594800469 | 7,321110934 | 5,597645823 | 3 |
| ENSGALG00000013060 | ADCY2    | 1,064982925 | 1,936215345 | 2,96245522  | 2,691019878 | 3 |
| ENSGALG00000013085 | PTPRO    | 8,814882072 | 9,635541753 | 16,31598922 | 11,48544595 | 3 |
| ENSGALG00000013204 |          | 11,67890458 | 12,83559276 | 15,73940433 | 14,21451059 | 3 |
| ENSGALG00000013605 | LRRC16A  | 24,93445177 | 27,46094865 | 32,7533139  | 29,62259302 | 3 |
| ENSGALG00000014139 |          | 48,56470481 | 50,53915714 | 62,44067282 | 56,14372316 | 3 |
| ENSGALG00000014371 | LGALS8   | 42,99482411 | 51,47866425 | 59,99952802 | 56,0859926  | 3 |
| ENSGALG00000014441 |          | 10,1718582  | 12,15414806 | 16,15178081 | 12,91195223 | 3 |
| ENSGALG00000014545 |          | 5,504651212 | 7,224808336 | 8,631274642 | 6,873714829 | 3 |
| ENSGALG00000014834 | NCOA7    | 17,62360916 | 20,65742055 | 26,25090959 | 22,94517424 | 3 |
| ENSGALG00000014841 | HDDC2    | 155,8070969 | 174,4976494 | 189,514832  | 184,7270869 | 3 |
| ENSGALG00000015196 | ASXL3    | 12,54053734 | 13,3023841  | 16,82687164 | 15,16050633 | 3 |

|                    |          |             |             |             |             |   |
|--------------------|----------|-------------|-------------|-------------|-------------|---|
| ENSGALG00000015355 | CD47     | 76,26899784 | 118,0330955 | 173,0471949 | 137,0561941 | 3 |
| ENSGALG00000015653 |          | 3,796339821 | 6,553253791 | 10,50484987 | 6,581133531 | 3 |
| ENSGALG00000015667 |          | 15,19349969 | 17,21199916 | 19,65556076 | 17,55600721 | 3 |
| ENSGALG00000015721 | SVEP1    | 1,737960293 | 2,245209146 | 3,02298257  | 2,299009295 | 3 |
| ENSGALG00000015858 | DOPEY1   | 10,26362443 | 12,06032829 | 15,43817177 | 12,56861101 | 3 |
| ENSGALG00000015865 |          | 8,149500097 | 14,67315572 | 23,51658618 | 18,36456973 | 3 |
| ENSGALG00000015995 | PTPRA    | 111,1055577 | 127,974971  | 137,2289686 | 127,4894494 | 3 |
| ENSGALG00000016285 |          | 18,08199823 | 20,16991605 | 23,48414703 | 21,6556274  | 3 |
| ENSGALG00000016329 | AGPAT5   | 54,88045679 | 57,69984224 | 65,85606335 | 59,46993298 | 3 |
| ENSGALG00000016350 | ARHGEF10 | 13,20943184 | 16,47206961 | 19,97855358 | 16,74087613 | 3 |
| ENSGALG00000016356 | TDRP     | 19,61514474 | 24,85234346 | 31,91658421 | 26,97607924 | 3 |
| ENSGALG00000016443 | HPCAL1   | 45,49523459 | 60,94224423 | 91,38350236 | 82,37034179 | 3 |
| ENSGALG00000016719 | TNFRSF21 | 32,04606952 | 36,62371331 | 51,90970368 | 46,80574718 | 3 |
| ENSGALG00000016746 |          | 6,325273962 | 6,601627683 | 8,839401918 | 7,699088309 | 3 |
| ENSGALG00000016779 | RNF149   | 40,32057066 | 43,89003588 | 53,7136991  | 48,40680769 | 3 |
| ENSGALG00000016909 | NDFIP2   | 79,60051734 | 96,09155119 | 149,2317403 | 108,9565955 | 3 |
| ENSGALG00000016927 |          | 4,423680336 | 5,818898304 | 11,01889315 | 6,732269887 | 3 |
| ENSGALG00000017112 | MTMR6    | 27,31233071 | 28,93025574 | 35,58260609 | 30,94460943 | 3 |
| ENSGALG00000017283 | CCND2    | 58,83812867 | 71,53308904 | 78,60163688 | 74,96269338 | 3 |
| ENSGALG00000017335 |          | 49,94809765 | 58,41748149 | 65,31328378 | 61,44158464 | 3 |
| ENSGALG00000017715 | TINAGL1  | 0,390432351 | 0,886129706 | 1,981143569 | 1,219554501 | 3 |
| ENSGALG00000021812 |          | 1,33055689  | 2,218290992 | 4,819468653 | 3,797137631 | 3 |
| ENSGALG00000022887 | KBTBD11  | 9,128381161 | 10,94614726 | 24,8936814  | 16,96298322 | 3 |
| ENSGALG00000022909 | PTPN3    | 1,705551313 | 2,69191956  | 5,75680131  | 4,605522677 | 3 |
| ENSGALG00000023027 |          | 5,819536568 | 8,734844706 | 12,14989903 | 8,702812739 | 3 |
| ENSGALG00000023193 |          | 22,82628116 | 26,83374341 | 46,03186329 | 34,00628372 | 3 |
| ENSGALG00000023857 |          | 23,87214226 | 28,64172799 | 31,048651   | 28,83857214 | 3 |
| ENSGALG00000026093 |          | 5,630092855 | 7,023865753 | 9,045481093 | 6,813892067 | 3 |
| ENSGALG00000026484 |          | 0,135024738 | 0,263566954 | 0,838178415 | 0,546375363 | 3 |
| ENSGALG00000026728 | AMMECR1L | 29,84210004 | 31,09949395 | 35,82038624 | 32,81834419 | 3 |
| ENSGALG00000026776 | TIGAR    | 13,56828479 | 16,77103564 | 21,89957869 | 19,88878977 | 3 |
| ENSGALG00000026795 |          | 0,217228639 | 0,495115948 | 2,256733718 | 1,191236832 | 3 |
| ENSGALG00000027070 | TIMP2    | 63,034473   | 97,3863476  | 154,0452617 | 134,7888119 | 3 |
| ENSGALG00000027241 |          | 0,952560408 | 1,466719985 | 3,039748701 | 2,207159329 | 3 |
| ENSGALG00000027255 | NRXN3    | 0,181357946 | 0,830745305 | 2,361320482 | 1,14505164  | 3 |
| ENSGALG00000027521 |          | 0,404163847 | 0,994883411 | 2,02843061  | 1,126800761 | 3 |
| ENSGALG00000027835 | PCBD1    | 94,80491215 | 113,5855851 | 151,1573142 | 114,9552317 | 3 |
| ENSGALG00000027983 | TNK2     | 4,828489899 | 7,027495256 | 8,351294461 | 7,398414931 | 3 |
| ENSGALG00000028242 |          | 6,695143255 | 8,395783618 | 9,169385188 | 8,751478338 | 3 |
| ENSGALG00000028935 | BCL10    | 31,45990136 | 34,35834737 | 53,25704847 | 43,70890102 | 3 |
| ENSGALG00000000177 |          | 3,672925592 | 4,7133494   | 28,69442229 | 13,64228432 | 4 |
| ENSGALG00000000581 | DDX42    | 79,71475033 | 75,27436341 | 94,20135848 | 80,66368967 | 4 |
| ENSGALG00000000638 | UTP4     | 130,0676455 | 96,70332836 | 165,3136722 | 132,8315835 | 4 |
| ENSGALG00000000652 | ACOT7    | 91,0618764  | 84,44688017 | 110,5059683 | 102,0297592 | 4 |
| ENSGALG00000000875 | PHLPP2   | 20,54132997 | 19,47427289 | 25,59885106 | 23,08633198 | 4 |
| ENSGALG00000000890 |          | 115,4827014 | 99,93575405 | 161,284949  | 135,4581557 | 4 |
| ENSGALG00000000891 | NSUN5    | 53,01503719 | 44,67338132 | 77,96581988 | 55,35290206 | 4 |
| ENSGALG00000000949 | HBEGF    | 1,41847004  | 1,85041107  | 12,65482264 | 5,806391814 | 4 |
| ENSGALG00000001020 |          | 29,88405432 | 26,56154792 | 64,98663159 | 38,60596779 | 4 |
| ENSGALG00000001025 | GOLGA1   | 22,45573384 | 18,51150657 | 29,42118809 | 24,79417751 | 4 |
| ENSGALG00000001194 |          | 212,5442816 | 205,1105713 | 287,0990995 | 265,262679  | 4 |
| ENSGALG00000001364 | CSNK1A1  | 415,1207983 | 409,9539609 | 501,5029834 | 437,3747681 | 4 |
| ENSGALG00000001382 | CDC2L1   | 72,94889565 | 67,80678106 | 88,43393376 | 81,89331757 | 4 |
| ENSGALG00000001546 | ZZEF1    | 12,49878851 | 12,56771979 | 17,15985806 | 15,54466993 | 4 |
| ENSGALG00000001551 | CCNL2    | 122,413604  | 108,8267176 | 162,3532986 | 139,7824135 | 4 |
| ENSGALG00000001876 |          | 9,90311991  | 9,249057674 | 14,02958487 | 10,97007453 | 4 |
| ENSGALG00000002198 | FHOD1    | 5,26743915  | 4,954885979 | 9,38561863  | 6,836917746 | 4 |
| ENSGALG00000002222 | NOC2L    | 118,3584902 | 95,02050883 | 142,0720819 | 116,3738506 | 4 |
| ENSGALG00000002362 | MANF     | 364,1212991 | 353,3282859 | 462,1312606 | 409,2625306 | 4 |
| ENSGALG00000002364 |          | 32,94239485 | 32,71450827 | 39,97668091 | 35,39664528 | 4 |
| ENSGALG00000002399 |          | 52,36416197 | 46,22509547 | 70,78493069 | 56,5784979  | 4 |
| ENSGALG00000002471 |          | 16,17379426 | 15,90253266 | 23,9774057  | 19,02253072 | 4 |

|                    |          |             |             |             |             |   |
|--------------------|----------|-------------|-------------|-------------|-------------|---|
| ENSGALG00000002709 | MYO1C    | 16,40141681 | 14,00693265 | 25,42132948 | 18,29325483 | 4 |
| ENSGALG00000002759 | PEAK1    | 12,11070695 | 12,37294828 | 18,07755992 | 15,14928933 | 4 |
| ENSGALG00000003039 | SRM      | 110,2374056 | 95,18663787 | 138,4535202 | 109,8554395 | 4 |
| ENSGALG00000003043 |          | 22,75792127 | 21,97305286 | 39,26576174 | 30,68440091 | 4 |
| ENSGALG00000003082 | DPH1     | 43,35222965 | 39,90415548 | 56,22303159 | 46,64836959 | 4 |
| ENSGALG00000003130 | DDX49    | 65,08104231 | 64,76205282 | 78,85615956 | 71,53496308 | 4 |
| ENSGALG00000003181 | SURF2    | 68,66649596 | 63,22622727 | 93,24040328 | 77,05363503 | 4 |
| ENSGALG00000003401 | FBXL22   | 1,842586497 | 2,069041413 | 5,714050546 | 4,460181323 | 4 |
| ENSGALG00000003563 | YARS     | 124,5878605 | 100,806762  | 161,5804147 | 129,3590756 | 4 |
| ENSGALG00000003726 | EGFLAM   | 3,127640917 | 2,882156629 | 6,50447413  | 3,899600608 | 4 |
| ENSGALG00000003830 |          | 56,83320796 | 53,87981451 | 71,17442725 | 65,73104839 | 4 |
| ENSGALG00000004042 |          | 38,46767509 | 32,97068481 | 61,87801155 | 49,83556181 | 4 |
| ENSGALG00000004063 | SLC25A14 | 52,88533686 | 51,42823816 | 66,67629574 | 61,35330486 | 4 |
| ENSGALG00000004089 |          | 17,77256296 | 16,78271592 | 24,42500908 | 19,86038229 | 4 |
| ENSGALG00000004098 | STK4     | 78,3035915  | 77,0974588  | 96,93702951 | 88,80516834 | 4 |
| ENSGALG00000004200 | DPP9     | 53,75067211 | 45,69989026 | 71,29460307 | 57,55657601 | 4 |
| ENSGALG00000004295 | CPD      | 62,31416544 | 60,36967779 | 77,78486944 | 67,0127332  | 4 |
| ENSGALG00000004437 | LHFPL2   | 20,63775236 | 19,68831498 | 34,32158717 | 26,52799986 | 4 |
| ENSGALG00000004625 | ATXN2    | 88,67526317 | 82,01836417 | 109,5403049 | 102,5728716 | 4 |
| ENSGALG00000004662 | DISP3    | 14,38521556 | 11,55502683 | 29,05261461 | 16,89063595 | 4 |
| ENSGALG00000004691 |          | 56,33686982 | 40,4318144  | 71,73587757 | 59,00776865 | 4 |
| ENSGALG00000004820 | FAM57A   | 12,31601366 | 10,07982253 | 19,55856559 | 14,55945516 | 4 |
| ENSGALG00000004938 |          | 54,1479251  | 51,08009956 | 67,80947377 | 62,11469064 | 4 |
| ENSGALG00000005139 | CLTC     | 200,1181658 | 191,6793455 | 253,6981165 | 209,8034908 | 4 |
| ENSGALG00000005318 |          | 3,152263541 | 2,662414727 | 5,120954069 | 3,784663378 | 4 |
| ENSGALG00000005433 |          | 36,83290793 | 32,95618637 | 55,24825615 | 43,10703235 | 4 |
| ENSGALG00000005464 |          | 85,83962449 | 85,8443126  | 105,9021193 | 93,37178801 | 4 |
| ENSGALG00000005582 | KLHL18   | 31,94479309 | 31,30348133 | 42,78533543 | 37,78377686 | 4 |
| ENSGALG00000005653 | NFKB2    | 19,40013661 | 19,08669938 | 32,80863272 | 23,57889165 | 4 |
| ENSGALG00000005660 | NF1      | 25,50711294 | 23,71387031 | 34,53169071 | 28,24626635 | 4 |
| ENSGALG00000005668 | WSB1     | 179,678984  | 146,1632157 | 214,4435918 | 176,4064239 | 4 |
| ENSGALG00000005679 | CDX1     | 1,304631914 | 0,905701649 | 2,563014719 | 1,644766779 | 4 |
| ENSGALG00000005691 |          | 0,879450332 | 1,016907284 | 4,287680194 | 2,372582554 | 4 |
| ENSGALG00000005727 |          | 87,5175031  | 54,87972446 | 124,3665649 | 87,29261047 | 4 |
| ENSGALG00000005962 |          | 96,05596249 | 97,74823491 | 129,0244635 | 115,5419182 | 4 |
| ENSGALG00000006225 | EFL1     | 25,89461358 | 24,34066277 | 33,72870887 | 27,27818148 | 4 |
| ENSGALG00000006430 |          | 34,42578206 | 34,74030494 | 42,66924729 | 38,00467817 | 4 |
| ENSGALG00000006512 | HSPA8    | 1476,479912 | 1243,966272 | 1904,025233 | 1566,091754 | 4 |
| ENSGALG00000006564 |          | 135,1349308 | 137,694922  | 164,941611  | 147,7888853 | 4 |
| ENSGALG00000006569 |          | 30,28902795 | 30,34830504 | 44,14456419 | 34,89953162 | 4 |
| ENSGALG00000006703 | GTPBP4   | 263,023663  | 226,6648498 | 306,5407089 | 275,5959813 | 4 |
| ENSGALG00000006908 | DLG1     | 79,94395383 | 69,9741556  | 167,5563942 | 97,80401695 | 4 |
| ENSGALG00000007056 |          | 14,79571572 | 13,46626993 | 33,62262451 | 21,76104972 | 4 |
| ENSGALG00000007174 | TNFSF15  | 1,102995748 | 0,448114415 | 2,915856114 | 1,855636786 | 4 |
| ENSGALG00000007241 | NUBP1    | 109,3181308 | 94,68377161 | 138,0537018 | 121,3146554 | 4 |
| ENSGALG00000007278 | GRIN2A   | 1,410215689 | 1,099864815 | 2,433976143 | 1,483307418 | 4 |
| ENSGALG00000007312 |          | 0,515818805 | 0,324808533 | 0,640115412 | 0,516898894 | 4 |
| ENSGALG00000007387 | GTF3C1   | 49,4431244  | 44,10989653 | 61,73807855 | 50,46690808 | 4 |
| ENSGALG00000007434 | RHBDF1   | 8,971085939 | 8,883515652 | 14,18157043 | 11,77887017 | 4 |
| ENSGALG00000007516 |          | 62,43238732 | 57,39706836 | 74,52591155 | 62,64255662 | 4 |
| ENSGALG00000007603 |          | 107,5989261 | 79,43933012 | 130,7533918 | 107,5767645 | 4 |
| ENSGALG00000007659 | HYOU1    | 247,2830843 | 202,3775908 | 337,8470085 | 253,6943761 | 4 |
| ENSGALG00000007704 |          | 344,7122616 | 259,8186212 | 567,3248203 | 425,2898747 | 4 |
| ENSGALG00000007793 | UPRT     | 63,74779044 | 56,0337098  | 86,10974443 | 72,54448635 | 4 |
| ENSGALG00000007845 | REL      | 11,42236566 | 10,4053628  | 17,28277767 | 14,80106617 | 4 |
| ENSGALG00000007846 |          | 0,386598336 | 0,938692576 | 50,96425002 | 26,68289287 | 4 |
| ENSGALG00000007932 | TRAF6    | 10,42206821 | 10,02548702 | 20,10355496 | 15,77060665 | 4 |
| ENSGALG00000007957 |          | 27,06104057 | 24,98161486 | 33,66292504 | 31,22532025 | 4 |
| ENSGALG00000008097 | CELF1    | 26,96388959 | 26,53468446 | 34,24988615 | 30,0909987  | 4 |
| ENSGALG00000008163 | PSME4    | 46,80933972 | 45,11907125 | 79,1287345  | 59,67413509 | 4 |
| ENSGALG00000008182 | CHAC2    | 6,548181465 | 7,336110999 | 17,67917062 | 12,66985204 | 4 |
| ENSGALG00000008211 | ACP2     | 64,70328045 | 58,45883411 | 80,09941154 | 66,54844454 | 4 |

|                    |         |             |             |             |             |   |
|--------------------|---------|-------------|-------------|-------------|-------------|---|
| ENSGALG00000008263 | CNTN4   | 1,106200523 | 1,176160283 | 3,185854517 | 2,100686659 | 4 |
| ENSGALG00000008348 | PDIA3   | 746,0442099 | 742,0928002 | 909,6299808 | 852,0733662 | 4 |
| ENSGALG00000008414 | DVL3    | 135,6013387 | 130,367946  | 176,8576759 | 158,0362434 | 4 |
| ENSGALG00000008520 | EIF4G1  | 229,5376092 | 185,6983546 | 301,8025317 | 265,7430302 | 4 |
| ENSGALG00000008521 |         | 31,18069235 | 29,21280914 | 43,31917635 | 33,76297669 | 4 |
| ENSGALG00000008680 |         | 3,676371429 | 3,695854361 | 6,469859596 | 5,35658988  | 4 |
| ENSGALG00000008708 |         | 37,14584777 | 32,77792521 | 49,18084278 | 37,57520453 | 4 |
| ENSGALG00000008778 | SPRED2  | 34,65788535 | 37,41244323 | 69,179714   | 49,64306392 | 4 |
| ENSGALG00000008942 | FOXN2   | 31,91191136 | 31,77313307 | 38,7914746  | 33,70013914 | 4 |
| ENSGALG00000009129 | DLX5    | 10,01865983 | 5,040758016 | 22,8485431  | 12,34243947 | 4 |
| ENSGALG00000009172 | OSBPL6  | 2,650564571 | 2,756249804 | 5,544541276 | 3,837527585 | 4 |
| ENSGALG00000009534 |         | 25,76733875 | 24,62278561 | 35,59283804 | 27,46733311 | 4 |
| ENSGALG00000009546 |         | 10,46067246 | 7,836081786 | 30,46916994 | 17,16886901 | 4 |
| ENSGALG00000009594 | RARRES1 | 9,3163689   | 9,894726709 | 19,208027   | 15,83960019 | 4 |
| ENSGALG00000009699 | CCNL1   | 91,8351549  | 82,06759115 | 115,5386418 | 102,8629539 | 4 |
| ENSGALG00000009906 | UBR2    | 22,46888792 | 22,12414082 | 27,23693376 | 24,46789564 | 4 |
| ENSGALG00000009946 | HECTD1  | 48,79520303 | 46,18145293 | 63,02540497 | 54,54830376 | 4 |
| ENSGALG00000010036 | FOSL2   | 1,42569897  | 0,793171681 | 12,63940938 | 7,470718426 | 4 |
| ENSGALG00000010049 | PTPRB   | 0,961664682 | 1,128851705 | 3,443635365 | 2,118202631 | 4 |
| ENSGALG00000010084 | EIF4G3  | 114,1687657 | 103,5506191 | 143,5390186 | 117,7492928 | 4 |
| ENSGALG00000010098 | SLC6A9  | 21,12603755 | 15,71173611 | 30,01896704 | 26,093241   | 4 |
| ENSGALG00000010167 | PNN     | 265,0067262 | 220,0057882 | 322,9605906 | 271,8747079 | 4 |
| ENSGALG00000010349 | POLR1C  | 117,943623  | 93,52322591 | 145,73653   | 117,5515932 | 4 |
| ENSGALG00000010361 |         | 48,97012579 | 44,43975772 | 68,27866824 | 55,34965362 | 4 |
| ENSGALG00000010786 |         | 4,097877003 | 2,931870248 | 5,490876839 | 4,103642012 | 4 |
| ENSGALG00000010836 |         | 3,785106733 | 3,728133151 | 7,708117179 | 4,823935284 | 4 |
| ENSGALG00000010967 |         | 58,3636706  | 56,63549114 | 79,71286329 | 65,06813368 | 4 |
| ENSGALG00000011055 |         | 3,528425682 | 2,14343308  | 3,539716441 | 3,81794966  | 4 |
| ENSGALG00000011058 | LEPR    | 0,561037727 | 0,528085813 | 2,462715898 | 1,549528016 | 4 |
| ENSGALG00000011331 | CTH     | 248,0035867 | 236,6542483 | 303,6507875 | 275,389819  | 4 |
| ENSGALG00000011419 | DUSP4   | 44,01115652 | 33,26358857 | 121,1807682 | 85,68812834 | 4 |
| ENSGALG00000011537 | PDE10A  | 17,52900263 | 13,79619641 | 27,86596367 | 20,34592748 | 4 |
| ENSGALG00000011833 |         | 29,27658949 | 25,74330458 | 117,5407031 | 60,95401121 | 4 |
| ENSGALG00000011962 |         | 24,37861772 | 19,78836623 | 76,1380067  | 54,90216003 | 4 |
| ENSGALG00000012137 | KTN1    | 52,45719129 | 52,70647636 | 63,46102016 | 56,68222967 | 4 |
| ENSGALG00000012202 |         | 52,23663855 | 47,13644927 | 66,99015096 | 54,26052413 | 4 |
| ENSGALG00000012342 | SASH1   | 23,67583218 | 24,00657812 | 31,8459396  | 26,74112268 | 4 |
| ENSGALG00000012354 |         | 38,36252665 | 31,9693923  | 72,19373709 | 50,92066877 | 4 |
| ENSGALG00000012404 | ERO1A   | 22,83857753 | 22,01192185 | 30,88099896 | 28,27942365 | 4 |
| ENSGALG00000012410 |         | 67,06196987 | 58,3818171  | 81,80427215 | 74,10521197 | 4 |
| ENSGALG00000012414 | GNPNAT1 | 66,78273296 | 56,41713595 | 92,31540052 | 73,43548792 | 4 |
| ENSGALG00000012626 |         | 14,77954066 | 13,73791725 | 18,79074056 | 15,62077944 | 4 |
| ENSGALG00000012696 |         | 60,55715685 | 57,86504    | 99,67821995 | 75,06643816 | 4 |
| ENSGALG00000012702 | JARID2  | 37,33195628 | 36,20655994 | 105,618813  | 76,98869311 | 4 |
| ENSGALG00000012847 |         | 0,986713969 | 0,845118709 | 4,302990379 | 2,59612048  | 4 |
| ENSGALG00000012852 | MKRN1   | 230,2783715 | 221,0113476 | 347,0213055 | 264,4287667 | 4 |
| ENSGALG00000013454 |         | 182,0155039 | 123,4948983 | 229,2326813 | 190,0588303 | 4 |
| ENSGALG00000013616 | OPRM1   | 8,498418048 | 8,602322585 | 13,37881711 | 10,98826365 | 4 |
| ENSGALG00000013677 |         | 30,75467791 | 29,88810558 | 39,45604034 | 37,02318823 | 4 |
| ENSGALG00000014080 |         | 0,21595968  | 0,263148688 | 1,065482871 | 0,727785613 | 4 |
| ENSGALG00000014445 |         | 231,7075249 | 162,1297126 | 273,7779191 | 224,85464   | 4 |
| ENSGALG00000014795 | TGIF1   | 90,42983611 | 80,36474464 | 117,3826664 | 93,7149106  | 4 |
| ENSGALG00000014880 |         | 7,049861195 | 6,527543364 | 11,03857212 | 8,462532694 | 4 |
| ENSGALG00000014922 | ROCK1   | 58,13294478 | 55,12527106 | 91,44699065 | 66,17491261 | 4 |
| ENSGALG00000015180 | PSAT1   | 39,87210776 | 38,25469818 | 74,32407226 | 52,26746661 | 4 |
| ENSGALG00000015184 |         | 18,40942927 | 17,96441873 | 31,32066199 | 23,65139942 | 4 |
| ENSGALG00000015271 | FILIP1L | 1,507114952 | 0,978526739 | 2,740725006 | 1,723861266 | 4 |
| ENSGALG00000015284 | RGMB    | 11,87565903 | 10,63508532 | 17,84314469 | 15,52968056 | 4 |
| ENSGALG00000015310 |         | 26,26727406 | 23,40911182 | 43,92421285 | 29,60330699 | 4 |
| ENSGALG00000015820 |         | 5,795989287 | 4,835828284 | 10,12157143 | 6,826990388 | 4 |
| ENSGALG00000015908 | COL12A1 | 1,280525315 | 0,982791397 | 3,642005312 | 1,798732148 | 4 |
| ENSGALG00000015930 |         | 89,77271382 | 89,18055945 | 105,8631291 | 96,52936382 | 4 |

|                    |          |             |             |             |             |   |
|--------------------|----------|-------------|-------------|-------------|-------------|---|
| ENSGALG00000015942 |          | 25,13739734 | 24,29186435 | 34,37777216 | 29,63188224 | 4 |
| ENSGALG00000015980 |          | 0,596196735 | 0,41874926  | 1,674898262 | 0,878230845 | 4 |
| ENSGALG00000016308 |          | 26,44250919 | 19,32816829 | 50,33957199 | 31,74534839 | 4 |
| ENSGALG00000016387 | TRAPPC12 | 41,96858601 | 38,40737819 | 51,57440402 | 44,44505587 | 4 |
| ENSGALG00000016506 | ZNF512   | 88,06015215 | 79,02693958 | 104,7277824 | 96,40793662 | 4 |
| ENSGALG00000016513 | PPM1G    | 230,2916367 | 196,6821079 | 271,5136768 | 260,5494092 | 4 |
| ENSGALG00000016764 | EIF5B    | 216,2000449 | 194,9595544 | 249,9786739 | 241,9844265 | 4 |
| ENSGALG00000016803 | ST6GAL2  | 35,94066123 | 32,07201411 | 58,08741372 | 43,47710939 | 4 |
| ENSGALG00000016807 |          | 34,55977522 | 25,87689197 | 63,00840571 | 44,52494993 | 4 |
| ENSGALG00000016816 | CDC16    | 62,16393798 | 54,16495998 | 74,3131724  | 66,19654442 | 4 |
| ENSGALG00000016817 | RASA3    | 18,72143367 | 21,1947238  | 46,6794009  | 30,14801484 | 4 |
| ENSGALG00000016841 |          | 23,36476602 | 15,1644545  | 49,52648097 | 33,88640549 | 4 |
| ENSGALG00000016843 | COL4A2   | 23,50684554 | 16,00417492 | 47,20989436 | 25,07421643 | 4 |
| ENSGALG00000017185 | TMEM123  | 82,3272294  | 82,74278569 | 123,1509651 | 97,26527034 | 4 |
| ENSGALG00000017320 |          | 172,8178042 | 158,3012361 | 208,2067185 | 188,3508122 | 4 |
| ENSGALG00000017418 | NPTX1    | 2,015625875 | 1,372808327 | 4,33776454  | 3,060994409 | 4 |
| ENSGALG00000018879 |          | 6,563062255 | 5,094820232 | 11,25672365 | 8,341936654 | 4 |
| ENSGALG00000019054 |          | 0,728717128 | 0,463400019 | 6,735112481 | 2,212402684 | 4 |
| ENSGALG00000019470 |          | 1,444283154 | 1,413792107 | 3,796706053 | 2,057755864 | 4 |
| ENSGALG00000020899 |          | 6,083043676 | 4,511874861 | 13,31624301 | 8,922200915 | 4 |
| ENSGALG00000022490 |          | 3,542294964 | 4,40309386  | 17,43885586 | 11,12767909 | 4 |
| ENSGALG00000023241 |          | 14,69724223 | 12,08407893 | 57,94569675 | 29,73935332 | 4 |
| ENSGALG00000023725 |          | 74,22983509 | 68,94311731 | 125,647953  | 97,24504122 | 4 |
| ENSGALG00000026034 | RGS17    | 3,024836883 | 2,866775508 | 5,550569778 | 4,08214868  | 4 |
| ENSGALG00000026251 |          | 0,057739324 | 0           | 0,072028586 | 0,0498639   | 4 |
| ENSGALG00000026379 |          | 0,919332817 | 0,655580292 | 2,303728052 | 1,597097731 | 4 |
| ENSGALG00000026468 | CHSY1    | 71,12020109 | 60,49110129 | 111,0111548 | 79,65498057 | 4 |
| ENSGALG00000026631 | HOXA10   | 0,174683257 | 0,06671589  | 0,623564049 | 0,246427429 | 4 |
| ENSGALG00000026862 | CLDN1    | 14,1101416  | 17,88491877 | 498,851265  | 292,4470901 | 4 |
| ENSGALG00000027057 |          | 45,65853393 | 41,50345279 | 55,55225266 | 47,46219036 | 4 |
| ENSGALG00000027132 |          | 21,35779753 | 20,57984953 | 27,44116286 | 24,14699039 | 4 |
| ENSGALG00000027526 | COL9A2   | 18,60130136 | 18,58810977 | 27,51237863 | 22,80853569 | 4 |
| ENSGALG00000027696 |          | 17,22300656 | 13,40010504 | 27,54529579 | 21,46414333 | 4 |
| ENSGALG00000027707 | ESM1     | 0,150067881 | 0,073206173 | 1,347708981 | 0,510169001 | 4 |
| ENSGALG00000028279 | SNORD14  | 59,56148275 | 36,73539954 | 85,15192697 | 70,25858401 | 4 |
| ENSGALG00000028675 |          | 43,07663481 | 36,65018625 | 58,259897   | 43,676594   | 4 |
| ENSGALG00000028773 |          | 88,44681977 | 88,70929071 | 105,8823606 | 98,70306764 | 4 |
| ENSGALG00000000166 |          | 4,929206982 | 8,868613541 | 10,16203898 | 7,489518013 | 5 |
| ENSGALG00000000874 |          | 27,5257408  | 42,0642166  | 38,71313331 | 35,44203257 | 5 |
| ENSGALG00000001443 |          | 61,90702775 | 100,220611  | 84,17995064 | 70,86083476 | 5 |
| ENSGALG00000001741 | NPTN     | 112,9186561 | 136,9981308 | 138,6382684 | 124,8191766 | 5 |
| ENSGALG00000001926 | HSPB1    | 26,87936471 | 51,36562943 | 52,8540106  | 47,19220813 | 5 |
| ENSGALG00000002602 |          | 3,588473784 | 4,875391746 | 5,77341269  | 4,458144988 | 5 |
| ENSGALG00000003126 | ERBB4    | 1,696937945 | 7,085918708 | 11,05966427 | 3,505512894 | 5 |
| ENSGALG00000003263 |          | 76,37963484 | 99,04824669 | 105,8462646 | 85,42780449 | 5 |
| ENSGALG00000003578 | FN1      | 62,38375818 | 70,31597704 | 75,66792654 | 66,94626169 | 5 |
| ENSGALG00000003642 | PDGF-A   | 28,92734021 | 56,03765372 | 46,12301374 | 39,27720096 | 5 |
| ENSGALG00000003748 | ANO5     | 25,09400369 | 31,77740288 | 32,82517973 | 30,40964521 | 5 |
| ENSGALG00000004071 | NETO2    | 43,78776373 | 55,53083264 | 54,37099849 | 37,75449027 | 5 |
| ENSGALG00000004118 |          | 7,47667819  | 26,22733823 | 20,20577066 | 14,30878756 | 5 |
| ENSGALG00000004184 | SPARC    | 155,0540441 | 232,7699504 | 211,3314171 | 199,4811275 | 5 |
| ENSGALG00000004215 | WIPI1    | 33,13808616 | 43,77015696 | 42,74430902 | 40,4803601  | 5 |
| ENSGALG00000004519 | TRPV2    | 0,822447882 | 1,60414895  | 2,273876542 | 1,268485872 | 5 |
| ENSGALG00000004686 |          | 30,2279262  | 36,35087632 | 37,69253986 | 35,20409282 | 5 |
| ENSGALG00000004710 | TMOD3    | 46,23733435 | 62,98353115 | 66,8079787  | 60,43811176 | 5 |
| ENSGALG00000004724 |          | 14,31585256 | 20,5405451  | 19,66998379 | 18,70531832 | 5 |
| ENSGALG00000005223 | PAC1     | 12,65150175 | 17,99234789 | 18,81912824 | 15,2360441  | 5 |
| ENSGALG00000005230 | MED13    | 32,91669497 | 36,87653151 | 39,04153735 | 36,48895089 | 5 |
| ENSGALG00000005256 | EPHA4    | 42,66846892 | 78,56615799 | 96,36961707 | 62,46596208 | 5 |
| ENSGALG00000005512 |          | 47,88593846 | 69,10907971 | 81,90943527 | 52,75638588 | 5 |
| ENSGALG00000006472 |          | 1,419681564 | 4,536593254 | 3,288727942 | 2,539433944 | 5 |
| ENSGALG00000006705 | MYOF     | 2,618645578 | 7,53302833  | 6,251568851 | 4,810717487 | 5 |



|                    |          |             |             |             |             |   |
|--------------------|----------|-------------|-------------|-------------|-------------|---|
| ENSGALG00000007343 |          | 0,49771636  | 3,066447888 | 2,335443105 | 1,682163718 | 5 |
| ENSGALG00000007766 | KIAA1217 | 5,142338869 | 9,945849569 | 7,737757011 | 6,6003621   | 5 |
| ENSGALG00000007809 | TSHZ2    | 5,283631458 | 12,9087792  | 13,412855   | 11,27929818 | 5 |
| ENSGALG00000008053 | PRDM11   | 21,30498282 | 24,55027354 | 26,50984007 | 23,21540024 | 5 |
| ENSGALG00000008222 | SLC26A5  | 29,61861728 | 40,31425403 | 46,54677335 | 38,47187747 | 5 |
| ENSGALG00000008281 | NEURL1   | 0,643796003 | 2,406738252 | 2,878119044 | 1,315326778 | 5 |
| ENSGALG00000008670 |          | 60,9188267  | 92,15789368 | 112,4269423 | 81,96474528 | 5 |
| ENSGALG00000008903 | SSFA2    | 9,137506036 | 12,52608672 | 14,56587518 | 11,95743887 | 5 |
| ENSGALG00000009163 |          | 8,759302894 | 14,89860879 | 16,52575933 | 11,8340751  | 5 |
| ENSGALG00000009378 | PDGFC    | 12,77846886 | 24,19271297 | 24,15556174 | 22,07089313 | 5 |
| ENSGALG00000009556 | PRICKLE1 | 10,09396138 | 19,24833012 | 25,35963008 | 17,81681241 | 5 |
| ENSGALG00000009645 | ESRRG    | 13,80191386 | 17,39972079 | 19,42718421 | 14,40652117 | 5 |
| ENSGALG00000010311 | NAV3     | 0,615932694 | 1,312817613 | 1,821822919 | 0,975422452 | 5 |
| ENSGALG00000010470 | TCERG1L  | 2,421080738 | 7,105845544 | 7,441496756 | 5,889451234 | 5 |
| ENSGALG00000010588 |          | 0,618826163 | 7,910358704 | 6,674385318 | 4,860719678 | 5 |
| ENSGALG00000011047 | LEPROT   | 49,88870182 | 65,03197595 | 64,41076564 | 61,76206291 | 5 |
| ENSGALG00000011254 | SATB1    | 11,10630754 | 13,32672382 | 15,03624216 | 12,84351007 | 5 |
| ENSGALG00000011288 | DACT2    | 43,3233096  | 77,67540397 | 56,71321695 | 50,47908136 | 5 |
| ENSGALG00000011373 | TECPR2   | 14,79142682 | 18,36494399 | 18,18702754 | 17,49834935 | 5 |
| ENSGALG00000011539 |          | 57,67498946 | 85,42119822 | 84,42143077 | 72,20633676 | 5 |
| ENSGALG00000011542 |          | 58,95969276 | 74,88826879 | 78,93145405 | 60,78404348 | 5 |
| ENSGALG00000011680 | EPHA5    | 8,20621494  | 24,36580423 | 24,51946644 | 14,89187836 | 5 |
| ENSGALG00000012251 |          | 20,12025104 | 26,36888417 | 27,50762152 | 21,56503412 | 5 |
| ENSGALG00000013031 | CECR1    | 5,057170782 | 7,128107118 | 8,312127528 | 5,595783665 | 5 |
| ENSGALG00000013134 |          | 22,82793318 | 29,22780923 | 31,32115935 | 27,27461137 | 5 |
| ENSGALG00000013503 | FAM149A  | 1,752925892 | 4,848988383 | 4,853083076 | 3,295521827 | 5 |
| ENSGALG00000013710 | SNX9     | 28,51304311 | 33,65160133 | 35,14415843 | 30,51214921 | 5 |
| ENSGALG00000013768 | PHACTR2  | 16,97204936 | 22,53311454 | 26,1533975  | 21,45971135 | 5 |
| ENSGALG00000015013 | MSX1     | 272,3083235 | 372,1131576 | 353,787571  | 293,7007336 | 5 |
| ENSGALG00000015096 | SH3GL2   | 6,752855595 | 9,972778277 | 10,62531102 | 9,697118369 | 5 |
| ENSGALG00000015167 | PRUNE2   | 0,376231707 | 0,978364886 | 0,754818696 | 0,73083871  | 5 |
| ENSGALG00000015193 | CCDC80   | 14,67870793 | 25,22532121 | 21,73900557 | 21,1053184  | 5 |
| ENSGALG00000015215 | MAPRE2   | 117,8139702 | 164,251409  | 175,9162941 | 136,884432  | 5 |
| ENSGALG00000015409 | PROS1    | 45,426329   | 66,08672514 | 83,84526057 | 55,91392118 | 5 |
| ENSGALG00000015794 |          | 5,438251718 | 7,227879991 | 7,741266482 | 6,719009922 | 5 |
| ENSGALG00000015797 |          | 0,53814002  | 7,856916105 | 2,807378812 | 2,732711798 | 5 |
| ENSGALG00000016160 |          | 8,263899107 | 10,02238742 | 10,67328648 | 9,407543829 | 5 |
| ENSGALG00000016258 |          | 0,878895793 | 3,431767393 | 3,190781752 | 1,828922771 | 5 |
| ENSGALG00000016276 | KHDRBS2  | 17,88353402 | 32,13830872 | 27,94112843 | 21,08977544 | 5 |
| ENSGALG00000016281 | DMD      | 17,81837254 | 29,46320013 | 29,11375678 | 20,07434969 | 5 |
| ENSGALG00000016495 | KLHL29   | 7,027776784 | 9,00783271  | 9,910837711 | 8,941313628 | 5 |
| ENSGALG00000016776 | TBC1D8   | 8,308297301 | 10,63215235 | 11,46728711 | 10,62476118 | 5 |
| ENSGALG00000016839 |          | 23,55110961 | 30,45895529 | 34,20721695 | 28,99322678 | 5 |
| ENSGALG00000016947 | ELF1     | 16,00351494 | 19,80439985 | 20,80439973 | 18,68259934 | 5 |
| ENSGALG00000016981 |          | 0,057692799 | 0,773832888 | 1,091983863 | 0,323032301 | 5 |
| ENSGALG00000017246 | ME3      | 13,03979429 | 22,01093333 | 24,71107053 | 22,21530556 | 5 |
| ENSGALG00000017411 | RXFP3    | 0,51168238  | 1,422949404 | 2,090496742 | 0,518778426 | 5 |
| ENSGALG00000024035 |          | 5,499637289 | 10,63733364 | 13,88164669 | 9,819516571 | 5 |
| ENSGALG00000025747 | NQO2     | 8,133537598 | 12,93516452 | 11,59383961 | 10,23613308 | 5 |
| ENSGALG00000026258 | MAF      | 0,778820903 | 9,324146442 | 13,1495057  | 6,561829291 | 5 |
| ENSGALG00000026370 |          | 0,891124883 | 2,751588481 | 2,510061088 | 1,175691721 | 5 |
| ENSGALG00000026486 |          | 4,237996386 | 7,869569204 | 6,981784134 | 3,839481651 | 5 |
| ENSGALG00000026991 |          | 1,07803858  | 1,847127388 | 1,949984514 | 1,262349842 | 5 |
| ENSGALG00000027627 |          | 30,89543317 | 50,46301542 | 50,55295596 | 43,60585579 | 5 |
| ENSGALG00000027947 | GHSR     | 0,104688776 | 0,849436519 | 0,862659404 | 0,749153227 | 5 |
| ENSGALG00000028602 |          | 13,19864069 | 32,69987166 | 40,67321367 | 22,05665612 | 5 |
| ENSGALG00000000151 | ADAMTS19 | 11,80611965 | 12,46514745 | 7,204855475 | 9,17871014  | 6 |
| ENSGALG00000000227 | DPYSL2   | 270,6999858 | 268,6183531 | 219,938641  | 254,0376962 | 6 |
| ENSGALG00000000280 | EFNA5    | 24,32055926 | 20,52988368 | 11,64998519 | 17,31698677 | 6 |
| ENSGALG00000000362 |          | 37,35064361 | 32,02718335 | 27,44376501 | 33,1655256  | 6 |
| ENSGALG00000000449 |          | 49,2665107  | 49,10237718 | 33,20160451 | 41,94914256 | 6 |
| ENSGALG00000000529 | LIMD2    | 93,67951598 | 94,89616479 | 75,32979772 | 80,66727455 | 6 |

|                    |          |             |             |             |             |   |
|--------------------|----------|-------------|-------------|-------------|-------------|---|
| ENSGALG00000000547 |          | 3,018242875 | 2,863860974 | 1,595558221 | 2,347638467 | 6 |
| ENSGALG00000000584 |          | 3,261584505 | 2,895004253 | 2,038105409 | 2,118177535 | 6 |
| ENSGALG00000000607 | GPR37L1  | 5,416118593 | 4,00865424  | 2,523565581 | 3,30135529  | 6 |
| ENSGALG00000000678 | CITED4   | 15,62473381 | 11,43958359 | 7,239375596 | 9,048783186 | 6 |
| ENSGALG00000000692 | CDK18    | 22,23095371 | 21,04019437 | 14,37658239 | 15,37207022 | 6 |
| ENSGALG00000000812 | OAZ1     | 489,9056014 | 482,0065382 | 407,200401  | 467,4568226 | 6 |
| ENSGALG00000000839 | WNT11    | 2,75489007  | 2,199440661 | 1,264090823 | 1,917561529 | 6 |
| ENSGALG00000000912 |          | 46,3292383  | 41,75530213 | 31,67896574 | 36,03517849 | 6 |
| ENSGALG00000001264 | PLXNA2   | 58,22770217 | 53,91327501 | 24,13638965 | 32,04174249 | 6 |
| ENSGALG00000001374 |          | 104,8241518 | 112,9489393 | 90,04261095 | 91,50863097 | 6 |
| ENSGALG00000001472 | JAM3     | 100,011492  | 93,74068448 | 82,19173947 | 92,91975166 | 6 |
| ENSGALG00000001506 |          | 368,3526839 | 372,9183268 | 296,0295963 | 339,4166627 | 6 |
| ENSGALG00000001567 |          | 126,5813492 | 129,435459  | 100,5746864 | 111,6667323 | 6 |
| ENSGALG00000001611 | B3GAT1   | 7,43006463  | 8,500157291 | 3,962658545 | 5,321053943 | 6 |
| ENSGALG00000001916 | SLIT3    | 25,76301015 | 25,02868434 | 16,99253818 | 21,07931886 | 6 |
| ENSGALG00000002005 |          | 5,413669282 | 5,77801867  | 2,751506276 | 4,550706014 | 6 |
| ENSGALG00000002024 | COMT     | 27,25339768 | 29,45942369 | 19,71910445 | 20,44636948 | 6 |
| ENSGALG00000002028 | GPRC5B   | 14,34185212 | 14,07342152 | 5,786874678 | 9,906480205 | 6 |
| ENSGALG00000002040 |          | 79,93552599 | 81,85898438 | 64,79086608 | 61,98429748 | 6 |
| ENSGALG00000002041 |          | 59,40242733 | 57,27740971 | 48,38350615 | 52,07872637 | 6 |
| ENSGALG00000002056 | TANGO2   | 45,88582661 | 46,90045634 | 35,03961486 | 37,17107403 | 6 |
| ENSGALG00000002116 | TEN1     | 20,56756935 | 19,76690486 | 13,13442349 | 13,44002686 | 6 |
| ENSGALG00000002155 |          | 76,89660127 | 81,52844767 | 49,12868241 | 64,57841702 | 6 |
| ENSGALG00000002377 | ENO1     | 5212,537489 | 5074,505023 | 4322,535611 | 4651,610527 | 6 |
| ENSGALG00000002552 |          | 10,14344218 | 8,496682359 | 6,743722308 | 7,370594553 | 6 |
| ENSGALG00000002561 |          | 27,30204849 | 27,24602203 | 20,69160555 | 25,05439519 | 6 |
| ENSGALG00000002645 |          | 15,71672487 | 13,70701973 | 8,631292786 | 8,68302629  | 6 |
| ENSGALG00000002897 | SLC16A14 | 27,20069002 | 23,63489477 | 17,04976801 | 16,06268463 | 6 |
| ENSGALG00000002909 |          | 111,6429653 | 108,8364841 | 65,45516928 | 74,21179258 | 6 |
| ENSGALG00000002911 | MOXD1    | 4,443996829 | 3,766709566 | 2,890068858 | 2,950915419 | 6 |
| ENSGALG00000002952 | NRG4     | 28,16643542 | 25,91401013 | 16,97766028 | 18,81496187 | 6 |
| ENSGALG00000003193 | CRABP-I  | 372,078802  | 401,8286749 | 212,1153567 | 250,9542932 | 6 |
| ENSGALG00000003212 | TSPO2    | 9,375586046 | 7,497418907 | 5,455285302 | 5,632090299 | 6 |
| ENSGALG00000003322 | TBC1D2B  | 23,0364406  | 23,04385432 | 18,28372397 | 14,42807756 | 6 |
| ENSGALG00000003374 | ESRP2    | 4,290851004 | 4,01526902  | 2,786837195 | 2,82526351  | 6 |
| ENSGALG00000003473 | SFRP1    | 198,6174832 | 161,8765433 | 117,5653707 | 121,237755  | 6 |
| ENSGALG00000003539 | KIAA1522 | 48,54035458 | 41,79698536 | 34,13776991 | 42,25080563 | 6 |
| ENSGALG00000003550 | ARHGAP40 | 3,317838701 | 2,653438966 | 1,952460676 | 2,348843771 | 6 |
| ENSGALG00000003602 |          | 17,85228161 | 18,32582058 | 13,19044577 | 14,56512893 | 6 |
| ENSGALG00000003732 | UCK1     | 74,42929071 | 77,91477397 | 61,41002009 | 65,22123954 | 6 |
| ENSGALG00000003742 | CPAMD8   | 22,90988764 | 20,34187827 | 16,93949378 | 18,38217809 | 6 |
| ENSGALG00000003829 | HPCAL4   | 9,672599215 | 8,323189404 | 5,220820337 | 7,313009587 | 6 |
| ENSGALG00000003894 |          | 39,49235103 | 48,65174612 | 23,31361969 | 26,19853057 | 6 |
| ENSGALG00000003965 | DBX1     | 120,9552444 | 117,7217027 | 51,14908628 | 70,42580158 | 6 |
| ENSGALG00000003973 | TLCD1    | 112,8068814 | 117,1801993 | 73,74619124 | 94,39823275 | 6 |
| ENSGALG00000004048 | PTPRS    | 155,7119771 | 161,4097176 | 128,6427922 | 143,3686471 | 6 |
| ENSGALG00000004249 | GRHL3    | 6,349924787 | 5,24388785  | 3,935762529 | 4,71839621  | 6 |
| ENSGALG00000004270 | ALDH1A2  | 27,69749738 | 24,65884251 | 18,46023442 | 21,00172637 | 6 |
| ENSGALG00000004370 | MAP2K6   | 29,31711165 | 33,73015033 | 16,64289398 | 21,44172167 | 6 |
| ENSGALG00000004527 |          | 2,134308872 | 2,240087571 | 1,027730715 | 1,26194997  | 6 |
| ENSGALG00000004598 | CUX2     | 10,91100525 | 10,38753268 | 7,769537303 | 10,06444635 | 6 |
| ENSGALG00000004849 | WSCD2    | 45,34791706 | 50,70050864 | 22,81269623 | 34,91261466 | 6 |
| ENSGALG00000004888 | RAI1     | 40,93525626 | 33,1953892  | 27,30738815 | 31,72051679 | 6 |
| ENSGALG00000005036 | SH2D3C   | 19,05266339 | 20,32939106 | 12,13835847 | 15,76846777 | 6 |
| ENSGALG00000005064 | PRPSAP2  | 180,1816199 | 171,8333543 | 152,3830656 | 151,8777115 | 6 |
| ENSGALG00000005107 |          | 70,58508054 | 63,43166224 | 49,22045308 | 51,47493334 | 6 |
| ENSGALG00000005396 |          | 24,53292592 | 23,39277847 | 16,09342546 | 13,16614788 | 6 |
| ENSGALG00000005409 |          | 9,602911865 | 11,56291556 | 4,665267822 | 5,939605674 | 6 |
| ENSGALG00000005608 | SLC9A3R2 | 41,76346794 | 36,24125491 | 25,01105653 | 35,56871411 | 6 |
| ENSGALG00000005616 | ARSI     | 10,31329519 | 8,403075571 | 5,912173057 | 7,138945964 | 6 |
| ENSGALG00000005632 | MRVI1    | 1,035430484 | 0,888938675 | 0,506588986 | 0,613816863 | 6 |
| ENSGALG00000005886 | WSCD1    | 42,42581136 | 36,95926631 | 26,36940368 | 25,78087186 | 6 |

|                    |          |             |             |             |             |   |
|--------------------|----------|-------------|-------------|-------------|-------------|---|
| ENSGALG00000005976 | TCEA2    | 151,1204022 | 158,0299347 | 129,1939558 | 140,5406725 | 6 |
| ENSGALG00000005981 | GDF2     | 35,21583503 | 34,95950736 | 15,63020753 | 18,34501736 | 6 |
| ENSGALG00000005985 | GDF10    | 151,8179242 | 133,3393762 | 68,22657308 | 67,90626041 | 6 |
| ENSGALG00000006211 | BCL2L1   | 77,71688202 | 69,24101045 | 46,01690957 | 57,52750738 | 6 |
| ENSGALG00000006277 |          | 43,37142919 | 41,65643624 | 34,95474443 | 37,42762996 | 6 |
| ENSGALG00000006341 |          | 2,477772914 | 1,863998893 | 1,22355805  | 1,629215459 | 6 |
| ENSGALG00000006360 |          | 116,2259025 | 108,0171956 | 99,60835707 | 100,7079967 | 6 |
| ENSGALG00000006420 | ABHD17C  | 43,96192153 | 44,25815693 | 36,5118052  | 39,97659664 | 6 |
| ENSGALG00000006456 | C16orf45 | 126,2885268 | 123,5755496 | 103,0104563 | 113,0436349 | 6 |
| ENSGALG00000006539 | C21orf2  | 91,92359624 | 96,93066537 | 72,63220666 | 80,75071846 | 6 |
| ENSGALG00000006576 | GRM3     | 5,093834571 | 4,402339701 | 1,89484859  | 3,657846954 | 6 |
| ENSGALG00000006583 | LSP1     | 130,1339628 | 114,8168042 | 87,05056318 | 96,05195296 | 6 |
| ENSGALG00000006662 |          | 4,073009343 | 3,076860613 | 1,949960342 | 2,615131782 | 6 |
| ENSGALG00000006715 | OAF      | 67,7069681  | 52,68685915 | 39,6578323  | 46,72294434 | 6 |
| ENSGALG00000006886 | DACH2    | 97,17562698 | 96,3669717  | 74,86391205 | 74,85847215 | 6 |
| ENSGALG00000006887 | FAM174B  | 113,7792578 | 123,4632073 | 89,0301308  | 92,30488335 | 6 |
| ENSGALG00000006950 | LIMK2    | 39,24605928 | 44,80038999 | 28,89988718 | 31,66912322 | 6 |
| ENSGALG00000006982 |          | 28,22770649 | 26,3955686  | 20,28855166 | 21,73180767 | 6 |
| ENSGALG00000007007 |          | 3,672988192 | 3,675424255 | 2,403461423 | 2,636506344 | 6 |
| ENSGALG00000007127 |          | 72,79567328 | 70,87318067 | 59,36657504 | 64,29580864 | 6 |
| ENSGALG00000007131 |          | 1741,940063 | 1718,967686 | 1405,400638 | 1577,061404 | 6 |
| ENSGALG00000007132 | ACOX2    | 3,920015175 | 3,800327799 | 2,227110374 | 3,369924911 | 6 |
| ENSGALG00000007364 | TOB1     | 25,92250443 | 23,41006218 | 15,10205731 | 18,83966369 | 6 |
| ENSGALG00000007441 |          | 37,78990923 | 39,61953583 | 19,20223432 | 28,70034349 | 6 |
| ENSGALG00000007719 |          | 8,587739597 | 8,673743587 | 4,950497049 | 4,790200635 | 6 |
| ENSGALG00000007819 | PDZRN3   | 7,790604113 | 6,689038204 | 4,884979375 | 6,326245839 | 6 |
| ENSGALG00000007839 | NCAM1    | 224,900862  | 248,3471659 | 164,3211414 | 191,3588384 | 6 |
| ENSGALG00000007912 | ATP9A    | 14,30496017 | 14,40885784 | 11,23211708 | 12,79682857 | 6 |
| ENSGALG00000007945 | CRYAB    | 28,66809483 | 20,95669537 | 10,44303707 | 14,14521444 | 6 |
| ENSGALG00000007993 | DCX      | 35,56507544 | 35,44942575 | 22,95234521 | 19,99682824 | 6 |
| ENSGALG00000008034 | CASKIN2  | 15,6733548  | 15,28382385 | 10,1352996  | 13,19245044 | 6 |
| ENSGALG00000008060 | PRKAR2B  | 56,53549837 | 55,35469483 | 39,37569127 | 48,11630919 | 6 |
| ENSGALG00000008136 | C2orf69  | 23,07666382 | 22,96082979 | 16,74740759 | 19,66350146 | 6 |
| ENSGALG00000008152 |          | 44,0565263  | 40,40259712 | 32,97020753 | 34,00914523 | 6 |
| ENSGALG00000008164 |          | 16,82913916 | 16,88116082 | 13,13788045 | 11,98403826 | 6 |
| ENSGALG00000008297 | SEMA4B   | 63,40218087 | 60,59213273 | 34,32024933 | 46,40412182 | 6 |
| ENSGALG00000008555 | MXI1     | 62,54223051 | 63,65172867 | 39,52038549 | 50,53829158 | 6 |
| ENSGALG00000008579 | OIP5     | 80,39985195 | 71,04664556 | 62,04889257 | 65,37711843 | 6 |
| ENSGALG00000008677 | VIM      | 1934,220794 | 2091,395034 | 1528,513774 | 1633,778736 | 6 |
| ENSGALG00000008774 |          | 240,3536889 | 235,8958052 | 155,5629281 | 192,5922241 | 6 |
| ENSGALG00000008850 | TTLL7    | 9,855630847 | 9,638036441 | 6,465694185 | 7,831903916 | 6 |
| ENSGALG00000009004 | ZNF804B  | 0,528433071 | 0,560499823 | 0,242320416 | 0,44430822  | 6 |
| ENSGALG00000009048 | ABLIM1   | 10,71327222 | 8,768191528 | 6,002604343 | 7,651491713 | 6 |
| ENSGALG00000009064 | FZD1     | 94,20126626 | 80,37022502 | 67,72298945 | 75,05676907 | 6 |
| ENSGALG00000009248 | HSPA12A  | 32,76381377 | 29,41540416 | 19,35339196 | 24,0607483  | 6 |
| ENSGALG00000009280 | NPY2R    | 7,52643434  | 6,490731964 | 4,241120616 | 4,842042787 | 6 |
| ENSGALG00000009291 | EPHX1    | 24,12810147 | 21,68268279 | 16,94897373 | 14,68925954 | 6 |
| ENSGALG00000009362 |          | 91,11750451 | 103,1144581 | 72,59595314 | 68,03634497 | 6 |
| ENSGALG00000009475 |          | 366,4300954 | 326,2865393 | 265,7944967 | 289,0206255 | 6 |
| ENSGALG00000009559 |          | 62,46382877 | 63,35737381 | 50,60514824 | 51,23070493 | 6 |
| ENSGALG00000009604 | DBX2     | 188,02469   | 164,9576559 | 71,47102484 | 112,4678314 | 6 |
| ENSGALG00000009650 |          | 40,35619744 | 41,46793477 | 31,51222177 | 31,26515047 | 6 |
| ENSGALG00000009799 |          | 131,9263511 | 123,4148587 | 88,50089928 | 102,2744474 | 6 |
| ENSGALG00000009905 | MDM1     | 34,94608598 | 38,49309929 | 27,93640968 | 26,68582306 | 6 |
| ENSGALG00000009948 | HHIP     | 34,10489404 | 29,81672032 | 12,8659564  | 17,40556709 | 6 |
| ENSGALG00000010055 | DAAM2    | 7,571786163 | 6,688168824 | 4,066430756 | 4,819714522 | 6 |
| ENSGALG00000010158 | KANK1    | 34,42266386 | 33,10703465 | 25,60147101 | 25,08690202 | 6 |
| ENSGALG00000010243 | PRDX1    | 1920,279994 | 1901,867506 | 1624,165646 | 1809,468067 | 6 |
| ENSGALG00000010711 | NXPH1    | 1,336267919 | 1,08347215  | 0,412641959 | 0,793884376 | 6 |
| ENSGALG00000010745 | HMGB2    | 960,0569077 | 950,3575761 | 759,8576275 | 846,3521199 | 6 |
| ENSGALG00000010758 |          | 80,09122628 | 85,39793585 | 63,98441519 | 61,48005141 | 6 |
| ENSGALG00000010761 | MRPL37   | 104,7510396 | 105,0379991 | 87,00391806 | 96,37058418 | 6 |

|                    |          |             |             |             |             |   |
|--------------------|----------|-------------|-------------|-------------|-------------|---|
| ENSGALG00000010854 | HDAC9    | 15,52765661 | 13,90606664 | 8,67588231  | 11,10862945 | 6 |
| ENSGALG00000010892 |          | 94,54684796 | 97,06101349 | 74,78496364 | 77,87489575 | 6 |
| ENSGALG00000010940 | ACSS3    | 17,0859282  | 19,73733137 | 11,03537862 | 13,6172326  | 6 |
| ENSGALG00000011019 | ROR1     | 31,89158503 | 33,92332362 | 19,77815514 | 25,04993277 | 6 |
| ENSGALG00000011083 |          | 31,53400696 | 29,83533586 | 21,70010114 | 21,42515155 | 6 |
| ENSGALG00000011117 | AGT      | 7,011848699 | 6,40595233  | 3,225035171 | 4,179528638 | 6 |
| ENSGALG00000011205 | SMOC2    | 28,04565303 | 26,98470908 | 9,630259431 | 18,70884659 | 6 |
| ENSGALG00000011283 | ZNF385D  | 2,605818014 | 2,669322669 | 1,67305957  | 2,163474606 | 6 |
| ENSGALG00000011296 | FRMD1    | 70,2232087  | 67,45990844 | 55,38004143 | 52,65139895 | 6 |
| ENSGALG00000011298 | RARB     | 55,69535963 | 47,68028638 | 38,04727303 | 37,68492663 | 6 |
| ENSGALG00000011442 | TGFB2    | 2,861068196 | 2,68853117  | 1,838107115 | 2,275891693 | 6 |
| ENSGALG00000011487 |          | 37,86246542 | 33,98107732 | 21,65815303 | 19,53005182 | 6 |
| ENSGALG00000011518 | POMGNT2  | 15,30539131 | 14,01183671 | 10,32877903 | 9,911142688 | 6 |
| ENSGALG00000011532 |          | 55,69108076 | 52,76270126 | 42,60190613 | 42,40119097 | 6 |
| ENSGALG00000011558 |          | 23,50941161 | 20,49599556 | 17,43700181 | 18,64310313 | 6 |
| ENSGALG00000011580 |          | 116,9362646 | 111,1956453 | 101,032554  | 102,3871869 | 6 |
| ENSGALG00000011592 | MRAS     | 26,78163289 | 27,15769346 | 16,17293361 | 23,32241226 | 6 |
| ENSGALG00000011657 | EAF2     | 88,86209982 | 78,74142964 | 59,13328659 | 70,88662684 | 6 |
| ENSGALG00000011712 |          | 27,43874052 | 26,29278103 | 16,13911667 | 16,52237231 | 6 |
| ENSGALG00000011742 | ART4     | 2,842510701 | 2,786801503 | 1,453508753 | 1,821990845 | 6 |
| ENSGALG00000011826 |          | 24,11633262 | 24,94919055 | 16,13711683 | 18,0713928  | 6 |
| ENSGALG00000011848 |          | 61,83068956 | 50,7503725  | 40,99509459 | 46,82618647 | 6 |
| ENSGALG00000012006 | RTN1     | 15,5752017  | 15,69038812 | 8,141532846 | 10,07584334 | 6 |
| ENSGALG00000012010 |          | 12,13552249 | 10,81139678 | 8,109147776 | 7,96587428  | 6 |
| ENSGALG00000012082 | FAIM     | 44,71906582 | 40,82570202 | 33,31693495 | 29,35247649 | 6 |
| ENSGALG00000012094 | SLC35F4  | 3,504266079 | 2,479954589 | 1,868276354 | 2,82870976  | 6 |
| ENSGALG00000012158 |          | 144,978586  | 127,8854779 | 106,8748489 | 109,7215444 | 6 |
| ENSGALG00000012219 | UNC5C    | 21,57499882 | 22,95837716 | 14,58740088 | 16,32433091 | 6 |
| ENSGALG00000012282 | L2HGDH   | 20,93313563 | 22,32547931 | 15,22212186 | 15,47060553 | 6 |
| ENSGALG00000012308 | MANBA    | 11,89786869 | 12,7530861  | 8,200203397 | 9,308437527 | 6 |
| ENSGALG00000012346 |          | 7,862982605 | 8,864901197 | 5,102603107 | 6,396826485 | 6 |
| ENSGALG00000012569 | FBXO7    | 73,79359843 | 76,51114178 | 60,47045786 | 56,31379388 | 6 |
| ENSGALG00000012575 | TLE1     | 42,64744251 | 40,35590358 | 26,26275038 | 30,7525678  | 6 |
| ENSGALG00000012621 |          | 23,12197697 | 21,50098662 | 17,51990666 | 20,73745298 | 6 |
| ENSGALG00000012747 | NEDD9    | 51,16943075 | 46,55544661 | 25,2270541  | 28,40372824 | 6 |
| ENSGALG00000012748 | ELOVL2   | 6,703664016 | 5,77345016  | 4,279673705 | 3,893667093 | 6 |
| ENSGALG00000012796 | KIAA1549 | 51,09108109 | 44,95257214 | 38,63565476 | 39,44896655 | 6 |
| ENSGALG00000013182 |          | 64,54611055 | 57,87116822 | 44,54062532 | 41,58771622 | 6 |
| ENSGALG00000013194 |          | 37,97153678 | 35,58529342 | 22,21115632 | 30,79003586 | 6 |
| ENSGALG00000013207 | CTNNAL1  | 96,43762659 | 88,20907865 | 78,48817168 | 78,03326849 | 6 |
| ENSGALG00000013297 | BBOX1    | 23,95421511 | 20,28591096 | 13,84454117 | 17,01177863 | 6 |
| ENSGALG00000013363 |          | 59,76145701 | 53,34909219 | 27,20240346 | 30,97263445 | 6 |
| ENSGALG00000013505 |          | 3,889722018 | 3,478768697 | 2,452222386 | 2,376785773 | 6 |
| ENSGALG00000013869 | IL20RA   | 6,972034921 | 7,7365372   | 3,434256512 | 4,89649334  | 6 |
| ENSGALG00000013948 | RASL11B  | 44,13163783 | 48,97517759 | 18,53083963 | 33,62688077 | 6 |
| ENSGALG00000014033 |          | 104,7477162 | 94,29244852 | 81,03494353 | 95,32221883 | 6 |
| ENSGALG00000014094 | STK38L   | 63,92061824 | 56,75448411 | 49,03019712 | 53,65761291 | 6 |
| ENSGALG00000014262 | APBB2    | 50,41157639 | 49,52225086 | 39,71176444 | 41,3726837  | 6 |
| ENSGALG00000014627 |          | 6,186249674 | 6,570860566 | 3,973407227 | 5,195659962 | 6 |
| ENSGALG00000014648 | CETN3    | 120,6378615 | 124,7051507 | 91,07219377 | 107,9915591 | 6 |
| ENSGALG00000014749 | EPHB6    | 39,83982973 | 37,84869471 | 30,92879956 | 29,01876058 | 6 |
| ENSGALG00000014853 | CLVS2    | 20,14220368 | 18,4145602  | 10,94311348 | 13,28443107 | 6 |
| ENSGALG00000014971 | SLC2A9   | 5,990387675 | 5,899169872 | 4,692471627 | 4,901640879 | 6 |
| ENSGALG00000015037 | EVC      | 23,92704947 | 26,1129777  | 17,06719452 | 14,17492822 | 6 |
| ENSGALG00000015109 |          | 47,46943411 | 46,36864366 | 35,65399625 | 39,11989952 | 6 |
| ENSGALG00000015349 | PIGG     | 15,28388747 | 14,19631757 | 12,44050293 | 12,25488892 | 6 |
| ENSGALG00000015368 | TMEM175  | 40,97091402 | 42,09879659 | 30,18566566 | 35,6655243  | 6 |
| ENSGALG00000015399 | FUT10    | 5,766769243 | 5,749814663 | 3,113288123 | 5,094696357 | 6 |
| ENSGALG00000015512 |          | 12,75994149 | 13,90362938 | 8,228539011 | 10,70286882 | 6 |
| ENSGALG00000015542 | PLPPR1   | 116,2967487 | 112,3139725 | 75,3404969  | 69,59821363 | 6 |
| ENSGALG00000015593 | EPHA7    | 23,76270266 | 25,30203349 | 15,93621129 | 16,69520231 | 6 |
| ENSGALG00000015628 | MSANTD1  | 27,98934213 | 27,89487479 | 19,00355994 | 16,65250297 | 6 |

|                    |           |             |             |             |             |   |
|--------------------|-----------|-------------|-------------|-------------|-------------|---|
| ENSGALG00000015661 |           | 25,53972785 | 27,31771949 | 16,46254751 | 21,18719894 | 6 |
| ENSGALG00000015702 |           | 165,4779657 | 153,2689949 | 126,1182243 | 131,223407  | 6 |
| ENSGALG00000015713 | FAM53A    | 97,02921321 | 94,00902169 | 72,8675515  | 69,6370911  | 6 |
| ENSGALG00000015749 |           | 21,2120221  | 17,80838104 | 14,06053735 | 17,19977004 | 6 |
| ENSGALG00000015812 | SMIM8     | 22,70170198 | 23,41415321 | 15,5950842  | 19,1637852  | 6 |
| ENSGALG00000015880 | HMGN3     | 377,9392173 | 394,1557704 | 311,1143085 | 339,3443829 | 6 |
| ENSGALG00000016027 |           | 94,40142812 | 100,8328093 | 71,31951897 | 75,50602922 | 6 |
| ENSGALG00000016067 | HMG14     | 441,5841588 | 451,8120476 | 376,4578579 | 378,3157428 | 6 |
| ENSGALG00000016100 |           | 16,68836719 | 14,10822856 | 9,670667046 | 14,44480754 | 6 |
| ENSGALG00000016161 |           | 20,22006123 | 21,56436875 | 14,06276308 | 15,46768923 | 6 |
| ENSGALG00000016222 | NDP       | 75,17879418 | 59,52253055 | 36,29361092 | 33,58711701 | 6 |
| ENSGALG00000016318 |           | 27,27843983 | 23,46508248 | 18,58560473 | 20,47415343 | 6 |
| ENSGALG00000016390 |           | 37,86603951 | 38,28740842 | 29,30950252 | 35,44055736 | 6 |
| ENSGALG00000016403 |           | 266,8591886 | 263,757375  | 206,1924561 | 172,5882396 | 6 |
| ENSGALG00000016411 |           | 14,25340121 | 13,22735653 | 5,731016335 | 9,570264498 | 6 |
| ENSGALG00000016477 |           | 32,59657778 | 30,23039623 | 26,7611813  | 26,75620295 | 6 |
| ENSGALG00000016511 | ADGRG2    | 2,386466849 | 2,957863341 | 0,902910309 | 1,512144222 | 6 |
| ENSGALG00000016570 |           | 5,798752701 | 5,090455098 | 2,401852442 | 4,386433754 | 6 |
| ENSGALG00000016636 |           | 5,617816157 | 5,062765544 | 2,035430911 | 2,908022952 | 6 |
| ENSGALG00000016731 |           | 239,7537815 | 224,2247214 | 208,7586328 | 215,0388526 | 6 |
| ENSGALG00000016895 | DZIP1     | 27,04772767 | 25,34766727 | 21,42357243 | 21,88134556 | 6 |
| ENSGALG00000017015 | RNASEH2B  | 56,39861841 | 51,8363735  | 44,83361055 | 48,79351186 | 6 |
| ENSGALG00000017032 |           | 58,5366442  | 56,1349687  | 48,61797983 | 48,88052127 | 6 |
| ENSGALG00000017074 |           | 4,074357168 | 3,691118729 | 1,412239719 | 2,952723128 | 6 |
| ENSGALG00000017119 | TNFRSF19  | 58,66491746 | 57,05921994 | 42,25493843 | 32,20227457 | 6 |
| ENSGALG00000017133 | EEF1AKMT1 | 26,99940931 | 29,0525506  | 20,74451252 | 21,42944072 | 6 |
| ENSGALG00000017195 | PGR       | 3,608790529 | 2,632589836 | 1,517382064 | 1,94031908  | 6 |
| ENSGALG00000017229 | FAT3      | 8,89802285  | 8,313903578 | 6,609729949 | 6,008519085 | 6 |
| ENSGALG00000017247 |           | 35,90192669 | 33,73272811 | 24,29212924 | 26,07653344 | 6 |
| ENSGALG00000017302 | SLCO2B1   | 1,429813469 | 1,146573087 | 0,673898438 | 0,668516203 | 6 |
| ENSGALG00000017371 |           | 51,38692014 | 50,91225956 | 38,09521913 | 45,83153263 | 6 |
| ENSGALG00000017405 | NPR3      | 23,00399694 | 22,53783009 | 13,33544434 | 18,73145328 | 6 |
| ENSGALG00000019198 |           | 17,59843277 | 15,08692745 | 10,51068089 | 8,621485841 | 6 |
| ENSGALG00000019514 | CNDP2     | 182,9891291 | 180,1386682 | 158,0964217 | 167,2312883 | 6 |
| ENSGALG00000019719 | KRT19     | 37,68434018 | 33,76138595 | 21,75346913 | 23,72609315 | 6 |
| ENSGALG00000020575 |           | 8,11802815  | 7,979917996 | 3,72206627  | 6,630432556 | 6 |
| ENSGALG00000020615 | STK32C    | 11,47277599 | 10,0537539  | 4,973755997 | 7,984705212 | 6 |
| ENSGALG00000020688 |           | 7,755595976 | 7,74751763  | 3,581525145 | 6,288357343 | 6 |
| ENSGALG00000020876 |           | 2,382805079 | 2,166538193 | 0,848276969 | 1,89263607  | 6 |
| ENSGALG00000020956 |           | 38,20475834 | 33,66535769 | 30,02776671 | 33,98390736 | 6 |
| ENSGALG00000020984 | FAM163A   | 20,23037736 | 16,5164079  | 11,68786047 | 14,02896446 | 6 |
| ENSGALG00000021285 |           | 186,2854475 | 165,9217969 | 136,042098  | 155,4656808 | 6 |
| ENSGALG00000021653 | IFT22     | 101,3073949 | 105,5647369 | 78,19787743 | 75,492151   | 6 |
| ENSGALG00000022891 |           | 63,01409828 | 62,3114166  | 49,31573941 | 51,86061496 | 6 |
| ENSGALG00000022967 |           | 19,86053476 | 14,53555584 | 9,909871032 | 11,74545585 | 6 |
| ENSGALG00000023073 |           | 75,25252995 | 70,70073732 | 46,37176598 | 61,58963078 | 6 |
| ENSGALG00000023279 | EPN3      | 18,11156599 | 18,44465948 | 11,60965438 | 15,0198188  | 6 |
| ENSGALG00000023542 |           | 44,21934953 | 41,11173749 | 33,22451866 | 36,77576397 | 6 |
| ENSGALG00000023683 | TCTN2     | 77,20303141 | 74,18428746 | 64,19070348 | 58,30899806 | 6 |
| ENSGALG00000023904 | FIBIN     | 19,51600353 | 16,39135199 | 8,430598252 | 11,5313733  | 6 |
| ENSGALG00000024294 |           | 3,558273438 | 3,080519379 | 1,266138207 | 1,949493615 | 6 |
| ENSGALG00000024481 |           | 133,9861745 | 137,3212927 | 96,10190154 | 120,9686545 | 6 |
| ENSGALG00000024486 |           | 127,4593345 | 112,050928  | 75,08512045 | 74,30239813 | 6 |
| ENSGALG00000025915 | ARRDC3    | 26,46755421 | 22,42622815 | 19,05714962 | 23,18559721 | 6 |
| ENSGALG00000026055 | PALM      | 62,96970401 | 58,46982113 | 37,62754481 | 51,55881293 | 6 |
| ENSGALG00000026119 |           | 19,50030797 | 15,03597578 | 10,89450307 | 13,56917513 | 6 |
| ENSGALG00000026153 |           | 13,21809934 | 13,27180391 | 6,109358729 | 11,47472691 | 6 |
| ENSGALG00000026351 |           | 7,714996646 | 7,132791831 | 4,733453719 | 4,737550727 | 6 |
| ENSGALG00000026388 |           | 7,176755468 | 5,70158915  | 3,356921795 | 5,377783467 | 6 |
| ENSGALG00000026424 | TOR2A     | 49,43334651 | 51,09796496 | 40,22928877 | 42,49356237 | 6 |
| ENSGALG00000026460 |           | 35,89548571 | 39,92113818 | 22,86822683 | 27,96586662 | 6 |
| ENSGALG00000026544 |           | 58,65981865 | 57,10160799 | 41,59272235 | 50,81686876 | 6 |

|                     |          |             |             |             |             |   |
|---------------------|----------|-------------|-------------|-------------|-------------|---|
| ENSGALG00000026560  |          | 36,96829613 | 26,69799391 | 17,90105267 | 27,48806165 | 6 |
| ENSGALG00000026622  |          | 3,176811988 | 2,665491808 | 1,529135988 | 2,006855906 | 6 |
| ENSGALG00000026704  | GPX8     | 14,6970356  | 14,21488529 | 8,762242734 | 6,869731027 | 6 |
| ENSGALG00000026722  | UNC119B  | 143,9059999 | 141,8749309 | 120,3644467 | 119,8965562 | 6 |
| ENSGALG00000026941  |          | 11,45825275 | 12,65274753 | 7,360856213 | 7,871403016 | 6 |
| ENSGALG00000027154  |          | 32,85298841 | 26,87435096 | 15,98536481 | 21,99669163 | 6 |
| ENSGALG00000027300  |          | 255,9415831 | 208,7324314 | 140,1583855 | 136,9067811 | 6 |
| ENSGALG00000027454  | CENPW    | 133,7719182 | 117,0934874 | 105,1892275 | 115,178855  | 6 |
| ENSGALG00000027498  | FOXB1    | 141,2191776 | 137,5736463 | 78,19797441 | 120,6686286 | 6 |
| ENSGALG00000027648  |          | 297,8558779 | 297,8555526 | 235,0735679 | 265,6448529 | 6 |
| ENSGALG00000027655  | TRABD2B  | 3,732000135 | 2,929243457 | 1,949007079 | 2,75895498  | 6 |
| ENSGALG00000027714  | ATG10    | 14,65174394 | 14,12262445 | 10,09229515 | 11,13826046 | 6 |
| ENSGALG00000027891  |          | 245,592978  | 266,7752548 | 119,3002211 | 176,3890275 | 6 |
| ENSGALG00000027907  | NR2F1    | 167,8585793 | 148,627158  | 100,6374936 | 126,2471647 | 6 |
| ENSGALG00000028005  | GADD45G  | 26,61578991 | 21,03730188 | 12,66743452 | 14,80395902 | 6 |
| ENSGALG00000028015  |          | 40,97729593 | 39,21000061 | 27,73413561 | 27,479133   | 6 |
| ENSGALG00000028142  | HACD4    | 1,371297566 | 1,176318136 | 0,666595527 | 0,732081177 | 6 |
| ENSGALG00000028168  |          | 21,67520772 | 22,20929179 | 18,06713907 | 16,59662597 | 6 |
| ENSGALG00000028221  |          | 9,866386893 | 9,886670244 | 5,735567879 | 7,645874692 | 6 |
| ENSGALG00000028506  | NHSL2    | 18,71016948 | 15,75409848 | 8,290834081 | 13,78916943 | 6 |
| ENSGALG00000028508  |          | 19,24169204 | 18,49325928 | 11,74503381 | 15,41263549 | 6 |
| ENSGALG00000028745  |          | 8,953044339 | 8,076698766 | 3,902548389 | 4,23747302  | 6 |
| ENSGALG00000028931  |          | 107,4437216 | 87,27433427 | 55,7926251  | 77,21406238 | 6 |
| ENSGALG00000029012  |          | 14,73441004 | 15,72458847 | 5,28285304  | 8,311412343 | 6 |
| ENSGALG00000000040  |          | 23,44475508 | 28,21280039 | 14,22402533 | 24,43401832 | 7 |
| ENSGALG000000000209 | PRNP     | 10,74066283 | 12,46930325 | 6,402314152 | 9,988641721 | 7 |
| ENSGALG000000000231 |          | 149,0870697 | 185,9234478 | 117,8750199 | 142,1973043 | 7 |
| ENSGALG000000000316 |          | 33,64295455 | 43,6406022  | 24,05590723 | 36,87840136 | 7 |
| ENSGALG000000000426 |          | 10,27991254 | 12,41662544 | 6,880846351 | 11,34770947 | 7 |
| ENSGALG000000000674 | MYO1D    | 4,406809187 | 6,316304931 | 2,455472407 | 4,256521683 | 7 |
| ENSGALG000000000713 | ZFHX3    | 39,06233202 | 43,14699726 | 29,26088997 | 38,05997761 | 7 |
| ENSGALG000000000897 |          | 4,978147826 | 7,378389371 | 2,837088455 | 5,487379033 | 7 |
| ENSGALG000000000899 |          | 0,963046208 | 5,946365074 | 0,475413557 | 2,252274664 | 7 |
| ENSGALG00000001024  | TPRG1L   | 120,9971135 | 152,3547079 | 103,4903126 | 132,788969  | 7 |
| ENSGALG00000001100  |          | 13,95505436 | 17,65108414 | 9,356507162 | 15,50884815 | 7 |
| ENSGALG00000001129  |          | 23,86423909 | 32,84739588 | 12,21283125 | 23,798218   | 7 |
| ENSGALG00000001329  | EPB41    | 65,34880758 | 78,02186828 | 51,24432241 | 67,40825669 | 7 |
| ENSGALG00000001446  |          | 64,62473612 | 87,21072718 | 48,6331509  | 76,52155764 | 7 |
| ENSGALG00000001449  | STRA6    | 45,37016661 | 58,55812578 | 27,01253734 | 47,99719354 | 7 |
| ENSGALG00000001475  |          | 3350,976054 | 3963,682871 | 2691,829167 | 3366,524715 | 7 |
| ENSGALG00000001492  | NDRG3    | 65,58399327 | 69,55303732 | 54,78233205 | 62,46719773 | 7 |
| ENSGALG00000001604  |          | 52,26872952 | 56,56561231 | 40,78881554 | 53,29231133 | 7 |
| ENSGALG00000001727  | LZTS1    | 8,163488473 | 25,58923197 | 4,764125596 | 14,44205782 | 7 |
| ENSGALG00000001795  |          | 10,08663077 | 20,53677    | 4,664121167 | 12,34777599 | 7 |
| ENSGALG00000001816  | MAGI3    | 22,47607338 | 29,09793529 | 15,71484571 | 21,83158076 | 7 |
| ENSGALG00000001966  |          | 25,7785394  | 36,09230687 | 17,73218323 | 27,60168099 | 7 |
| ENSGALG00000001996  | DNALI1   | 33,7845802  | 40,3539152  | 23,78692763 | 32,34237044 | 7 |
| ENSGALG00000002016  | PRKCD    | 9,534583077 | 25,41833693 | 5,509761135 | 13,37710012 | 7 |
| ENSGALG00000002055  | hairy1   | 100,9426832 | 191,0596931 | 71,9414387  | 159,5868237 | 7 |
| ENSGALG00000002098  | GRIK3    | 3,884532135 | 6,948087025 | 1,414247851 | 2,595929492 | 7 |
| ENSGALG00000002125  | TMOD1    | 19,78933687 | 23,97315207 | 12,05769249 | 16,67488273 | 7 |
| ENSGALG00000002169  | PLEKHB2  | 32,6969416  | 49,0144176  | 25,10240291 | 39,31342986 | 7 |
| ENSGALG00000002225  | RFFL     | 28,82366062 | 33,4994994  | 22,79136152 | 26,46140023 | 7 |
| ENSGALG00000002437  | FAM69B   | 10,34052265 | 18,5207246  | 6,353529848 | 13,77821286 | 7 |
| ENSGALG00000002484  | CRYM     | 52,30050528 | 59,7062453  | 38,85736704 | 51,40699758 | 7 |
| ENSGALG00000002610  |          | 13,09856503 | 27,92032271 | 8,551552499 | 20,41307335 | 7 |
| ENSGALG00000002692  |          | 7,601162153 | 8,489273999 | 4,867865763 | 6,523571836 | 7 |
| ENSGALG00000002707  | CHRNA2   | 22,21560311 | 33,9138735  | 14,13296126 | 22,61297767 | 7 |
| ENSGALG00000002712  |          | 98,06557273 | 124,0459701 | 60,94436313 | 78,26408645 | 7 |
| ENSGALG00000002742  | TMEM132B | 21,18839394 | 28,46994537 | 12,23650943 | 23,57680408 | 7 |
| ENSGALG00000002749  |          | 15,4477782  | 18,83801502 | 9,210681708 | 15,54271584 | 7 |
| ENSGALG00000002777  |          | 206,4893527 | 235,0657741 | 145,3623973 | 217,0270845 | 7 |

|                    |          |             |             |             |             |   |
|--------------------|----------|-------------|-------------|-------------|-------------|---|
| ENSGALG00000002804 | RND2     | 7,564698815 | 11,37308686 | 3,691136555 | 7,382372138 | 7 |
| ENSGALG00000002818 |          | 76,01900762 | 92,05204683 | 46,3235432  | 73,16432864 | 7 |
| ENSGALG00000002840 | GRM4     | 38,07446155 | 45,47238554 | 23,80739886 | 33,41537259 | 7 |
| ENSGALG00000002891 | ACADL    | 101,9928444 | 126,3938118 | 85,60119687 | 110,7373997 | 7 |
| ENSGALG00000002940 |          | 63,67353296 | 73,60062167 | 49,11114405 | 52,63840174 | 7 |
| ENSGALG00000003099 | PCTP     | 55,94909963 | 68,55104571 | 39,17056499 | 50,10135455 | 7 |
| ENSGALG00000003135 | ANK3     | 29,82803871 | 36,54263    | 22,66405296 | 23,3794697  | 7 |
| ENSGALG00000003185 | SCPEP1   | 39,41581989 | 47,08505296 | 26,77264651 | 36,20660242 | 7 |
| ENSGALG00000003345 |          | 8,011075734 | 13,2054126  | 4,141316066 | 10,41345166 | 7 |
| ENSGALG00000003445 | MGST3    | 164,0311496 | 177,1818225 | 134,4152099 | 167,0547988 | 7 |
| ENSGALG00000003474 | MED20    | 110,444728  | 116,7026163 | 88,99338596 | 109,2480186 | 7 |
| ENSGALG00000003580 | MMP2     | 7,325674272 | 32,10481709 | 4,372959973 | 11,83675111 | 7 |
| ENSGALG00000003588 |          | 41,80910808 | 61,28137773 | 18,99649734 | 38,34816043 | 7 |
| ENSGALG00000003589 | VTN      | 114,2225217 | 150,0745088 | 69,50664764 | 114,9001653 | 7 |
| ENSGALG00000003595 | SARM1    | 30,68252668 | 34,98549632 | 21,8893545  | 27,60935273 | 7 |
| ENSGALG00000003648 | SVIP     | 22,22982974 | 29,46021773 | 15,12642168 | 17,95720385 | 7 |
| ENSGALG00000003832 | TEX264   | 15,86809856 | 27,52547475 | 11,7554828  | 23,97522593 | 7 |
| ENSGALG00000003999 |          | 13,72215726 | 16,36238679 | 11,0995887  | 12,90633719 | 7 |
| ENSGALG00000004038 | ADAL     | 25,17562849 | 34,56044312 | 19,02897515 | 26,71696561 | 7 |
| ENSGALG00000004236 | TRAF3IP1 | 33,67265581 | 37,7057156  | 28,80217302 | 29,82775189 | 7 |
| ENSGALG00000004323 | RASAL2   | 17,46458791 | 24,05795653 | 11,68718553 | 21,19348944 | 7 |
| ENSGALG00000004448 | BRINP2   | 7,422301548 | 13,10562437 | 2,669166415 | 9,017834641 | 7 |
| ENSGALG00000004472 | ASTN1    | 45,27241295 | 56,98089896 | 25,40185133 | 42,4550224  | 7 |
| ENSGALG00000004581 | NDST1    | 36,77466572 | 44,71190372 | 29,08485213 | 41,89895888 | 7 |
| ENSGALG00000004593 | SULF2    | 30,06159727 | 56,14934678 | 19,86175058 | 37,91786843 | 7 |
| ENSGALG00000004623 | AGTRAP   | 23,55850976 | 32,14710496 | 15,71775217 | 22,70328234 | 7 |
| ENSGALG00000004676 |          | 44,69765223 | 67,37462526 | 26,5567982  | 52,68656003 | 7 |
| ENSGALG00000004705 | BUD31    | 190,1039203 | 210,7250422 | 159,5584737 | 195,6353874 | 7 |
| ENSGALG00000004769 |          | 231,0703098 | 265,9633181 | 188,117676  | 223,1112578 | 7 |
| ENSGALG00000004812 | FAM129A  | 3,011515596 | 4,419696057 | 1,922761698 | 3,474926272 | 7 |
| ENSGALG00000004844 |          | 38,76266742 | 46,85070174 | 21,59843211 | 33,82333789 | 7 |
| ENSGALG00000004851 |          | 102,8684263 | 153,4847972 | 80,99247061 | 119,9569497 | 7 |
| ENSGALG00000004873 |          | 21,88445189 | 28,72943819 | 17,20757599 | 23,79151605 | 7 |
| ENSGALG00000005062 | FoxN4    | 4,362960232 | 23,41120468 | 2,672268849 | 13,15759672 | 7 |
| ENSGALG00000005076 |          | 2,97258771  | 5,738604455 | 1,868991974 | 4,403336028 | 7 |
| ENSGALG00000005203 | OLFM3    | 9,917656348 | 19,51400136 | 6,107981318 | 12,50996987 | 7 |
| ENSGALG00000005446 |          | 433,5296312 | 485,9292058 | 357,6286444 | 378,096764  | 7 |
| ENSGALG00000005502 | KCNG4    | 0,912952006 | 1,203243361 | 0,297105278 | 0,60110466  | 7 |
| ENSGALG00000005539 |          | 10,06496779 | 11,46804537 | 4,811243877 | 8,97883854  | 7 |
| ENSGALG00000005549 | CUEDC1   | 24,9585639  | 31,73680379 | 17,96776786 | 28,07856242 | 7 |
| ENSGALG00000005626 | TPST2    | 11,80433122 | 16,81885809 | 6,363075005 | 13,39419824 | 7 |
| ENSGALG00000005657 | CRHR2    | 16,41937448 | 21,14097462 | 9,617236635 | 17,9916876  | 7 |
| ENSGALG00000005901 | PCMTD2   | 15,03826855 | 22,94366732 | 12,20442379 | 18,1485811  | 7 |
| ENSGALG00000005967 |          | 16,34607915 | 27,95004368 | 5,734444886 | 19,79268951 | 7 |
| ENSGALG00000006014 |          | 11,83239403 | 17,79556194 | 8,524616365 | 16,16215962 | 7 |
| ENSGALG00000006036 |          | 51,78288032 | 72,39218737 | 37,65758569 | 61,49569637 | 7 |
| ENSGALG00000006083 |          | 4,451611687 | 9,146359521 | 3,028486674 | 6,106851928 | 7 |
| ENSGALG00000006172 | ABCC8    | 10,46414413 | 12,87547866 | 7,792903566 | 8,971268996 | 7 |
| ENSGALG00000006192 |          | 6,56151079  | 13,70633898 | 3,575297057 | 7,644373335 | 7 |
| ENSGALG00000006233 |          | 73,88654127 | 86,5339275  | 62,67969355 | 65,81661353 | 7 |
| ENSGALG00000006490 | SCN3B    | 48,56309698 | 61,96270518 | 30,47526127 | 36,08774643 | 7 |
| ENSGALG00000006588 | LRRC75B  | 20,28960188 | 26,05813662 | 15,10431218 | 21,90900245 | 7 |
| ENSGALG00000006606 |          | 6,809091308 | 32,17770953 | 5,138243105 | 16,8368564  | 7 |
| ENSGALG00000006780 |          | 245,3841891 | 304,5147127 | 196,4819313 | 254,7782702 | 7 |
| ENSGALG00000006792 | VSTM2L   | 14,91896564 | 24,34060472 | 8,041765026 | 19,66450542 | 7 |
| ENSGALG00000006857 | SPATA20  | 13,000609   | 15,94295579 | 10,59989797 | 14,33927151 | 7 |
| ENSGALG00000006873 | PHRF1    | 51,794473   | 56,56115769 | 28,13525923 | 43,64214396 | 7 |
| ENSGALG00000006882 | ST8SIA2  | 43,06730195 | 67,38681182 | 26,22541309 | 54,35238193 | 7 |
| ENSGALG00000006942 |          | 132,4198867 | 227,8606087 | 86,86056301 | 125,7845777 | 7 |
| ENSGALG00000007076 | CCNY     | 18,51574898 | 24,71732273 | 11,69363679 | 18,88976684 | 7 |
| ENSGALG00000007078 |          | 2,87252386  | 4,383770523 | 1,005692341 | 3,383060819 | 7 |
| ENSGALG00000007128 | SH3BGRL  | 214,2530874 | 229,1837125 | 167,2589166 | 211,0428624 | 7 |



|                    |         |             |             |             |             |   |
|--------------------|---------|-------------|-------------|-------------|-------------|---|
| ENSGALG00000007211 | CDH22   | 1,485142793 | 2,494244579 | 0,548146547 | 1,816562264 | 7 |
| ENSGALG00000007262 | SPG21   | 71,40763929 | 85,58144568 | 58,23479154 | 64,58167991 | 7 |
| ENSGALG00000007732 | RTN4R   | 3,699735966 | 6,809590742 | 2,178228147 | 5,983400116 | 7 |
| ENSGALG00000007748 | SLC16A2 | 20,32729004 | 25,80043621 | 12,93321002 | 22,99796604 | 7 |
| ENSGALG00000007780 | EIF4E3  | 18,03876093 | 38,22663339 | 13,64586903 | 30,5542396  | 7 |
| ENSGALG00000007908 |         | 5,792965987 | 13,97554053 | 2,389386077 | 7,707065248 | 7 |
| ENSGALG00000007943 |         | 19,29727515 | 23,99833693 | 15,17755759 | 15,86135712 | 7 |
| ENSGALG00000007965 | HN1     | 411,0251371 | 434,100802  | 329,5995071 | 408,922843  | 7 |
| ENSGALG00000008438 | SLC35C1 | 124,3184986 | 149,9093654 | 98,43575195 | 132,7600199 | 7 |
| ENSGALG00000008455 |         | 32,31963069 | 57,54084189 | 14,64828513 | 25,24367492 | 7 |
| ENSGALG00000008697 | RBM20   | 3,846768505 | 4,926267748 | 2,456023592 | 3,647659329 | 7 |
| ENSGALG00000008700 | PDCD4   | 325,6337309 | 399,5164392 | 238,9464322 | 293,0805554 | 7 |
| ENSGALG00000008728 | PTER    | 6,3399657   | 8,156910559 | 4,337055382 | 7,10541263  | 7 |
| ENSGALG00000008755 |         | 67,34340554 | 73,50049392 | 52,70850781 | 64,66558339 | 7 |
| ENSGALG00000008818 | IDH1    | 71,66766176 | 91,61503146 | 53,6340664  | 74,86640267 | 7 |
| ENSGALG00000008865 | ALAD    | 139,8444823 | 169,0120545 | 111,5900089 | 141,221191  | 7 |
| ENSGALG00000009002 |         | 1,28675173  | 1,674918274 | 0,613968423 | 1,412361787 | 7 |
| ENSGALG00000009042 | ISM1    | 19,65944442 | 27,17765292 | 9,838603957 | 17,08408347 | 7 |
| ENSGALG00000009052 | LBH     | 37,94812104 | 96,15335335 | 19,71154839 | 42,02747293 | 7 |
| ENSGALG00000009134 | CTTNBP2 | 11,40771871 | 15,88432695 | 8,530144038 | 10,85876386 | 7 |
| ENSGALG00000009212 | MND1    | 66,79405001 | 75,25435741 | 49,15985084 | 63,46334427 | 7 |
| ENSGALG00000009354 |         | 11,65567463 | 14,51617495 | 8,805310484 | 9,634955967 | 7 |
| ENSGALG00000009439 | GPR85   | 17,44009003 | 22,44330748 | 10,32374078 | 18,89710187 | 7 |
| ENSGALG00000009478 |         | 12,99711452 | 17,0630503  | 6,327520434 | 10,68724831 | 7 |
| ENSGALG00000009536 |         | 8,930747832 | 11,26382701 | 4,868019414 | 9,734234384 | 7 |
| ENSGALG00000009537 | PPM1L   | 15,19652092 | 19,19973765 | 9,532288845 | 11,64296507 | 7 |
| ENSGALG00000009601 | NELL2   | 110,2961344 | 154,2484566 | 51,22048418 | 99,21561222 | 7 |
| ENSGALG00000009603 |         | 11,49975548 | 14,99438031 | 4,75072532  | 9,623024967 | 7 |
| ENSGALG00000009670 | SGCE    | 59,43794591 | 65,07796911 | 46,83087493 | 55,09067955 | 7 |
| ENSGALG00000009959 |         | 35,62728541 | 41,80367214 | 20,63974566 | 27,91189617 | 7 |
| ENSGALG00000009977 | SMAD1   | 78,48081668 | 94,47814686 | 67,52132303 | 77,34497377 | 7 |
| ENSGALG00000010119 | CDKL2   | 8,919919874 | 17,83271101 | 5,399685531 | 10,94164418 | 7 |
| ENSGALG00000010127 | GLO1    | 231,8522951 | 279,4946021 | 191,8389983 | 204,8112253 | 7 |
| ENSGALG00000010137 | TTC6    | 1,287993124 | 1,948479866 | 0,779674705 | 0,991764128 | 7 |
| ENSGALG00000010139 | SSTR1   | 7,978023763 | 12,61992979 | 4,912549304 | 10,41199792 | 7 |
| ENSGALG00000010269 | KCNAB1  | 10,86190361 | 16,59727193 | 6,653570316 | 13,2184581  | 7 |
| ENSGALG00000010320 | PAWR    | 34,60903172 | 62,08502203 | 21,78625211 | 37,50489825 | 7 |
| ENSGALG00000010422 |         | 103,3041586 | 158,2231145 | 73,72776386 | 121,1270632 | 7 |
| ENSGALG00000010441 |         | 56,2447908  | 64,77433617 | 43,50838618 | 56,84118443 | 7 |
| ENSGALG00000010444 |         | 30,2192376  | 32,99747957 | 23,77039516 | 26,95022033 | 7 |
| ENSGALG00000010533 | ELAVL4  | 101,3698774 | 123,7671942 | 80,28112842 | 100,1644983 | 7 |
| ENSGALG00000010611 | CFAP97  | 27,26735677 | 31,60703776 | 21,00245601 | 25,6223608  | 7 |
| ENSGALG00000010797 |         | 2,204962564 | 3,597171829 | 1,242295373 | 2,737107629 | 7 |
| ENSGALG00000010982 |         | 34,9067668  | 47,34640946 | 23,85218963 | 36,57797015 | 7 |
| ENSGALG00000010997 | DFNA5   | 30,98330411 | 36,05207494 | 25,73539441 | 33,02230238 | 7 |
| ENSGALG00000011078 |         | 29,00849301 | 32,4201808  | 22,47842078 | 27,65933043 | 7 |
| ENSGALG00000011176 | SCRN1   | 73,33672636 | 113,3873336 | 57,54804702 | 76,21746157 | 7 |
| ENSGALG00000011200 | THBS2   | 4,729378665 | 17,96316127 | 2,101963158 | 7,934820548 | 7 |
| ENSGALG00000011238 | WLS     | 398,6085265 | 452,0423133 | 298,9173487 | 386,8213626 | 7 |
| ENSGALG00000011276 | BTG1    | 502,7455821 | 558,6321082 | 412,3661019 | 452,7358963 | 7 |
| ENSGALG00000011350 | NEGR1   | 20,33143431 | 23,86084881 | 12,71729034 | 19,59581703 | 7 |
| ENSGALG00000011444 | MFHAS1  | 58,17054063 | 70,52843469 | 40,96561842 | 49,56226035 | 7 |
| ENSGALG00000011655 | IQCB1   | 23,64106498 | 26,10604734 | 13,7260757  | 19,72872665 | 7 |
| ENSGALG00000011656 |         | 0,973892515 | 2,15913225  | 0,52062462  | 0,800954632 | 7 |
| ENSGALG00000011709 |         | 10,59850516 | 15,02453029 | 4,939474354 | 10,42674333 | 7 |
| ENSGALG00000011778 |         | 23,66787702 | 28,8235186  | 17,91116836 | 26,20801542 | 7 |
| ENSGALG00000011798 | HEBP1   | 12,49320521 | 25,56914364 | 7,850759982 | 11,62061774 | 7 |
| ENSGALG00000011810 |         | 65,9521746  | 82,87507381 | 51,45272236 | 58,71022908 | 7 |
| ENSGALG00000012044 |         | 9,229584329 | 12,71447637 | 7,5350979   | 9,063435059 | 7 |
| ENSGALG00000012057 |         | 11,18597673 | 12,61517469 | 8,164876186 | 10,80367383 | 7 |
| ENSGALG00000012092 | ESYT3   | 4,680130309 | 6,111516607 | 2,253806553 | 3,990397078 | 7 |
| ENSGALG00000012116 |         | 9,646935596 | 13,32089976 | 6,14467466  | 11,39954133 | 7 |

|                    |          |             |             |             |             |   |
|--------------------|----------|-------------|-------------|-------------|-------------|---|
| ENSGALG00000012185 | PLA2G12A | 102,7974734 | 112,7403772 | 84,43323048 | 105,0643144 | 7 |
| ENSGALG00000012191 |          | 32,82020057 | 46,37361014 | 18,84566996 | 32,6990559  | 7 |
| ENSGALG00000012362 | THSD7B   | 3,775092996 | 10,36024079 | 2,69688283  | 7,22396186  | 7 |
| ENSGALG00000012377 | HNMT     | 1,717135166 | 6,060908343 | 0,573693554 | 1,878896194 | 7 |
| ENSGALG00000012487 |          | 24,24348782 | 31,4734152  | 16,11839467 | 23,96854961 | 7 |
| ENSGALG00000012652 |          | 10,7529658  | 25,54973014 | 5,663246629 | 17,81444342 | 7 |
| ENSGALG00000012658 | TCP11L2  | 15,92414007 | 33,05220242 | 11,27908373 | 28,17571503 | 7 |
| ENSGALG00000012692 | SIRT5    | 45,36256371 | 63,38567531 | 35,0481337  | 44,42038027 | 7 |
| ENSGALG00000012714 |          | 43,94791511 | 52,13807433 | 33,7764496  | 43,47609852 | 7 |
| ENSGALG00000012715 | CAP2     | 8,59191649  | 11,46991422 | 4,148180559 | 9,301130175 | 7 |
| ENSGALG00000012791 | TBXAS1   | 1,864983737 | 3,103081301 | 0,74879117  | 2,141225714 | 7 |
| ENSGALG00000013002 | DAP1     | 32,2061213  | 57,91577834 | 24,03389605 | 42,05183833 | 7 |
| ENSGALG00000013067 |          | 137,5096802 | 191,3369487 | 110,2279785 | 152,0190566 | 7 |
| ENSGALG00000013837 |          | 59,04391774 | 71,3460663  | 48,21803842 | 49,19810217 | 7 |
| ENSGALG00000013876 |          | 202,1069193 | 227,9456838 | 159,7823013 | 213,2983315 | 7 |
| ENSGALG00000013964 | SPATA18  | 5,231802216 | 6,450354247 | 3,531114535 | 5,627475195 | 7 |
| ENSGALG00000013980 | SLC2A12  | 1,779452239 | 4,860254934 | 0,730603455 | 2,144183869 | 7 |
| ENSGALG00000014004 |          | 38,19788449 | 43,26576373 | 28,71001642 | 36,16158832 | 7 |
| ENSGALG00000014233 | FBLN1    | 100,2616639 | 153,9996924 | 85,13157946 | 116,6781323 | 7 |
| ENSGALG00000014242 |          | 24,47453838 | 32,12228945 | 16,30724171 | 25,76182082 | 7 |
| ENSGALG00000014258 | LIMCH1   | 11,23039493 | 16,58171204 | 4,316562472 | 9,590761217 | 7 |
| ENSGALG00000014300 |          | 2,585478889 | 4,334338666 | 1,496149583 | 2,982896803 | 7 |
| ENSGALG00000014496 | Prom1    | 38,69686144 | 62,3200769  | 30,55765133 | 41,6577711  | 7 |
| ENSGALG00000014537 | BMF      | 66,59173617 | 87,81261663 | 47,00373868 | 44,31366941 | 7 |
| ENSGALG00000014661 | FAM172A  | 53,62830077 | 59,84785505 | 44,237488   | 54,90827811 | 7 |
| ENSGALG00000014662 | RBP5     | 94,12229359 | 110,0266074 | 71,71186194 | 92,49555572 | 7 |
| ENSGALG00000014699 | MEGF10   | 5,113117701 | 7,375190092 | 1,931874889 | 3,210163737 | 7 |
| ENSGALG00000014812 | SIDT1    | 6,795260519 | 16,41334784 | 4,233919069 | 10,62192737 | 7 |
| ENSGALG00000014833 | RPL37    | 1596,687135 | 1720,735968 | 1387,064356 | 1578,22352  | 7 |
| ENSGALG00000014844 |          | 19,41962485 | 24,18777381 | 13,76691142 | 17,52298328 | 7 |
| ENSGALG00000014941 |          | 4,499019336 | 9,516121976 | 2,714813327 | 8,305086794 | 7 |
| ENSGALG00000015075 |          | 14,78424772 | 16,24793751 | 7,992995674 | 13,23798293 | 7 |
| ENSGALG00000015183 | RAB13    | 27,51711853 | 44,6852246  | 16,72602217 | 36,46505352 | 7 |
| ENSGALG00000015297 | FOXO3    | 24,37599027 | 33,24133814 | 13,94064542 | 26,23468786 | 7 |
| ENSGALG00000015537 | MAN2B2   | 30,3066011  | 45,5128118  | 21,78564425 | 29,42547877 | 7 |
| ENSGALG00000015543 | MRPL50   | 97,51826513 | 108,3654216 | 76,17159113 | 102,4663452 | 7 |
| ENSGALG00000015551 | GRIN3A   | 5,679152207 | 17,73134218 | 3,841307699 | 16,43553314 | 7 |
| ENSGALG00000015660 | SNX30    | 42,56777807 | 79,83420568 | 30,02031755 | 56,72491395 | 7 |
| ENSGALG00000015762 | LYRM2    | 37,69692925 | 47,81440333 | 26,81605255 | 32,66012008 | 7 |
| ENSGALG00000015768 |          | 28,37209383 | 38,55451722 | 16,41325642 | 31,2891459  | 7 |
| ENSGALG00000015774 | CYYR1    | 73,07270964 | 93,2325043  | 46,68077123 | 68,44045186 | 7 |
| ENSGALG00000015780 | PNRC1    | 344,5438061 | 552,0456497 | 280,6093647 | 398,9770095 | 7 |
| ENSGALG00000015903 |          | 11,13980945 | 17,28591052 | 7,220689109 | 10,09139434 | 7 |
| ENSGALG00000015967 | LRRTM1   | 3,686312959 | 5,438787671 | 1,609278461 | 3,628427823 | 7 |
| ENSGALG00000015987 |          | 23,3708759  | 36,39569956 | 15,7535009  | 22,36869225 | 7 |
| ENSGALG00000016223 |          | 3,343218403 | 5,947487934 | 1,855740174 | 4,018942369 | 7 |
| ENSGALG00000016251 |          | 93,77894807 | 167,1461162 | 59,86796921 | 128,2348016 | 7 |
| ENSGALG00000016289 | DST      | 15,90950987 | 19,20924281 | 11,20078851 | 13,75441035 | 7 |
| ENSGALG00000016322 |          | 31,14927638 | 36,17694833 | 22,78652856 | 32,10595086 | 7 |
| ENSGALG00000016463 | FAM49A   | 89,87725864 | 97,84634246 | 78,24594873 | 86,88895017 | 7 |
| ENSGALG00000016518 | PHKA2    | 22,70891315 | 25,28803726 | 16,10212794 | 20,50180035 | 7 |
| ENSGALG00000016543 | NHS      | 23,2035252  | 27,27258538 | 13,39269629 | 22,59847883 | 7 |
| ENSGALG00000016549 | CTPS2    | 7,332248006 | 10,148353   | 5,828515996 | 8,094284    | 7 |
| ENSGALG00000016551 | AP1S2    | 150,331608  | 388,8047531 | 100,7222479 | 269,0706899 | 7 |
| ENSGALG00000016697 | MUT      | 33,31728166 | 36,06625525 | 27,10395955 | 31,40871266 | 7 |
| ENSGALG00000016870 | TMTC4    | 37,55391684 | 53,03696736 | 30,09752082 | 43,11923341 | 7 |
| ENSGALG00000016945 | LECT1    | 36,93378975 | 51,37890081 | 22,55103978 | 46,08609363 | 7 |
| ENSGALG00000017036 | LHFP     | 57,15964101 | 140,0778702 | 35,52548196 | 97,5065896  | 7 |
| ENSGALG00000017072 | N4BP2L1  | 13,74550565 | 22,46637191 | 10,03427041 | 19,42210549 | 7 |
| ENSGALG00000017106 | ATP8A2   | 4,502878382 | 10,93890475 | 2,617722948 | 6,161186837 | 7 |
| ENSGALG00000017219 | C11orf54 | 30,51387908 | 33,47914202 | 23,10946363 | 29,3091597  | 7 |
| ENSGALG00000017321 | PLEKHB1  | 21,68327263 | 24,29861118 | 15,96522023 | 20,23831437 | 7 |

|                    |              |             |             |             |             |   |
|--------------------|--------------|-------------|-------------|-------------|-------------|---|
| ENSGALG00000017326 |              | 51,59859703 | 55,00738274 | 41,05442188 | 47,2276208  | 7 |
| ENSGALG00000017329 | FCHSD2       | 14,45697367 | 17,25365137 | 11,28085158 | 16,13712426 | 7 |
| ENSGALG00000017331 |              | 3,159907146 | 5,517577508 | 1,862654243 | 4,660927839 | 7 |
| ENSGALG00000017332 | KLHL35       | 12,22287679 | 16,1880175  | 5,959667234 | 8,934592728 | 7 |
| ENSGALG00000017334 |              | 8,363048271 | 10,26995253 | 6,118966477 | 8,105085971 | 7 |
| ENSGALG00000017342 |              | 3,582341309 | 4,647630554 | 1,063461596 | 2,894726481 | 7 |
| ENSGALG00000017374 |              | 7,866867941 | 11,57898563 | 3,96740595  | 10,0765853  | 7 |
| ENSGALG00000017926 | 7SK          | 13,43570614 | 17,43926497 | 5,12370302  | 13,13564085 | 7 |
| ENSGALG00000018624 |              | 211,612459  | 247,6923528 | 121,693404  | 178,5967543 | 7 |
| ENSGALG00000019280 |              | 31,88812177 | 75,53173467 | 15,04830691 | 37,69512136 | 7 |
| ENSGALG00000020376 |              | 138,5609605 | 183,9703067 | 71,81940611 | 129,9222041 | 7 |
| ENSGALG00000020528 | INIP         | 136,2608495 | 170,1147196 | 109,1941668 | 152,6630137 | 7 |
| ENSGALG00000020626 |              | 21,17069503 | 23,62411008 | 14,87384185 | 20,507544   | 7 |
| ENSGALG00000021021 | ARL4C        | 275,3523921 | 337,3144485 | 220,9487353 | 242,8119461 | 7 |
| ENSGALG00000021344 |              | 9,857224916 | 10,97152481 | 7,024591987 | 9,213278791 | 7 |
| ENSGALG00000021972 |              | 101,8915641 | 119,2500243 | 83,48016628 | 106,4157224 | 7 |
| ENSGALG00000022713 |              | 139,0657773 | 202,1677216 | 94,76044509 | 146,646949  | 7 |
| ENSGALG00000022718 |              | 6,91125738  | 10,33059383 | 3,599725653 | 8,616716382 | 7 |
| ENSGALG00000022838 |              | 6,670263015 | 8,568090621 | 4,322962094 | 6,400590802 | 7 |
| ENSGALG00000022896 | IRX4         | 0,349425233 | 0,593038773 | 0,239827947 | 0,525323997 | 7 |
| ENSGALG00000023042 |              | 11,1327311  | 13,31359085 | 7,176717915 | 11,03847192 | 7 |
| ENSGALG00000023131 | PDXP         | 56,87831586 | 59,99147542 | 45,64640553 | 52,21241518 | 7 |
| ENSGALG00000023189 | UMAD1        | 64,4654313  | 78,99153297 | 45,33959426 | 68,96410803 | 7 |
| ENSGALG00000023621 | SFXN3        | 7,518241748 | 11,9378823  | 4,437892273 | 10,8074635  | 7 |
| ENSGALG00000023655 |              | 27,08945009 | 36,20494428 | 18,57596443 | 31,99177494 | 7 |
| ENSGALG00000023738 |              | 48,2607002  | 63,37886353 | 23,3954474  | 42,14401685 | 7 |
| ENSGALG00000023751 |              | 2,121704326 | 39,53753646 | 8,474198433 | 21,85058761 | 7 |
| ENSGALG00000023812 |              | 15,06664138 | 19,18104403 | 10,25652845 | 15,75468054 | 7 |
| ENSGALG00000023881 | PLXDC1       | 4,82633085  | 5,58847381  | 2,844462158 | 4,814461859 | 7 |
| ENSGALG00000025163 | gga-mir-1627 | 110,9384893 | 123,3023999 | 64,38404565 | 94,51602649 | 7 |
| ENSGALG00000025698 | 5_8S_rRNA    | 214,2147206 | 274,3953045 | 109,3746589 | 240,8884729 | 7 |
| ENSGALG00000025818 |              | 34,66056389 | 52,36778343 | 27,68112335 | 42,84794983 | 7 |
| ENSGALG00000025977 | GADD45A      | 65,82047393 | 81,42861239 | 46,15966381 | 67,89681053 | 7 |
| ENSGALG00000026042 |              | 16,59308302 | 28,8879479  | 8,277397044 | 18,77618411 | 7 |
| ENSGALG00000026103 |              | 9,300012163 | 12,28619669 | 3,508789346 | 8,103143537 | 7 |
| ENSGALG00000026113 |              | 55,31332896 | 69,44178259 | 41,36543103 | 62,22853953 | 7 |
| ENSGALG00000026180 |              | 43,38860094 | 74,08650761 | 27,9624619  | 44,23281888 | 7 |
| ENSGALG00000026437 |              | 53,32978665 | 106,3553563 | 42,99932252 | 73,23714682 | 7 |
| ENSGALG00000026505 |              | 6,840702248 | 11,78765652 | 4,728224671 | 8,990305294 | 7 |
| ENSGALG00000026600 | C1orf198     | 62,51064096 | 97,06115423 | 52,49014482 | 69,67854538 | 7 |
| ENSGALG00000026870 |              | 22,81793746 | 48,40836989 | 17,04944091 | 35,73639395 | 7 |
| ENSGALG00000027027 |              | 12,17687155 | 19,36749454 | 8,327209902 | 16,49890464 | 7 |
| ENSGALG00000027058 | EMP2         | 9,670752435 | 14,47252177 | 6,676394562 | 11,60111876 | 7 |
| ENSGALG00000027173 | TMEM159      | 101,3603219 | 133,3366653 | 66,720424   | 98,09898988 | 7 |
| ENSGALG00000027337 |              | 35,30559561 | 46,3009554  | 28,71685084 | 40,66049371 | 7 |
| ENSGALG00000027351 | LRRC71       | 12,41099266 | 13,81465571 | 7,63665904  | 11,62692947 | 7 |
| ENSGALG00000027377 |              | 13,23118924 | 17,08047841 | 8,393624566 | 12,22092941 | 7 |
| ENSGALG00000027418 | HINT2        | 54,35709786 | 65,97192429 | 37,50431959 | 54,53621881 | 7 |
| ENSGALG00000027511 |              | 94,02464102 | 203,238416  | 68,70151952 | 146,2623945 | 7 |
| ENSGALG00000027534 |              | 22,63698    | 42,16451109 | 16,01154358 | 30,54121339 | 7 |
| ENSGALG00000027695 | PCBP4        | 162,956744  | 178,0507957 | 132,4616368 | 163,8638337 | 7 |
| ENSGALG00000027778 |              | 0,760117162 | 7,843427702 | 2,238665183 | 3,422613312 | 7 |
| ENSGALG00000027793 | SCN9A        | 2,260801542 | 2,687945527 | 1,301123732 | 1,749485357 | 7 |
| ENSGALG00000027904 |              | 130,5879679 | 138,1008328 | 105,1857775 | 127,8946055 | 7 |
| ENSGALG00000027920 |              | 8,224921324 | 11,67541101 | 4,941372418 | 10,16266736 | 7 |
| ENSGALG00000028031 | C1QL1        | 3,855114072 | 6,583157269 | 1,783653583 | 5,460140979 | 7 |
| ENSGALG00000028187 | FUNDC1       | 50,26900328 | 65,59407968 | 42,88306331 | 53,15622678 | 7 |
| ENSGALG00000028234 |              | 4,065747386 | 5,588221597 | 1,848844705 | 4,176917872 | 7 |
| ENSGALG00000028281 |              | 0,539773136 | 0,627847197 | 0,388756816 | 0,499963427 | 7 |
| ENSGALG00000028284 | PTX3         | 1,360269657 | 1,613746408 | 0,640931131 | 1,214844992 | 7 |
| ENSGALG00000028371 |              | 1205,986207 | 2113,34695  | 600,0776823 | 1309,782147 | 7 |
| ENSGALG00000028443 |              | 106,3466323 | 117,1726174 | 52,65285501 | 90,77932913 | 7 |

|                    |         |             |             |             |             |   |
|--------------------|---------|-------------|-------------|-------------|-------------|---|
| ENSGALG00000028567 | MYL9    | 25,71491939 | 30,84447999 | 19,34651722 | 28,9008983  | 7 |
| ENSGALG00000028605 |         | 33,48063752 | 44,87000567 | 24,5313162  | 38,26157979 | 7 |
| ENSGALG00000028635 |         | 36,25602462 | 40,97336372 | 25,19241388 | 34,21441251 | 7 |
| ENSGALG00000028946 |         | 2,681879198 | 4,752514748 | 1,279230013 | 3,51800798  | 7 |
| ENSGALG00000029037 |         | 150,1495751 | 180,3499614 | 124,9709847 | 155,381485  | 7 |
| ENSGALG00000029102 | PXYLP1  | 43,95109752 | 57,83768431 | 29,96371923 | 35,84248398 | 7 |
| ENSGALG00000029150 | AK1     | 74,20126426 | 117,6906446 | 51,63919399 | 106,9208251 | 7 |
| ENSGALG00000000402 | LOXL2   | 5,954483122 | 5,824945864 | 3,968242539 | 6,612512106 | 8 |
| ENSGALG00000000433 |         | 1272,018653 | 1440,431589 | 928,8310457 | 1560,586316 | 8 |
| ENSGALG00000000921 |         | 20,02878103 | 21,81551147 | 15,53568376 | 22,32711039 | 8 |
| ENSGALG00000000966 |         | 20,47256091 | 19,52267998 | 15,14294559 | 19,21668586 | 8 |
| ENSGALG00000000970 |         | 121,5454735 | 107,7587292 | 88,7857163  | 113,9503321 | 8 |
| ENSGALG00000001026 |         | 36,75836285 | 36,46182397 | 30,03854447 | 37,77669558 | 8 |
| ENSGALG00000001040 |         | 2,135610314 | 2,701891274 | 1,274424793 | 3,016335863 | 8 |
| ENSGALG00000001096 |         | 305,8554674 | 349,0409519 | 253,9138438 | 350,2592113 | 8 |
| ENSGALG00000001144 | ZNF346  | 38,22164066 | 33,87809183 | 30,12408592 | 37,38262219 | 8 |
| ENSGALG00000001191 | MEOX1   | 7,04229087  | 7,660896452 | 4,783886826 | 10,65337693 | 8 |
| ENSGALG00000001342 | HCN2    | 3,566827073 | 3,913196094 | 2,003233469 | 3,567430691 | 8 |
| ENSGALG00000001668 |         | 65,31424271 | 61,00669811 | 56,15496715 | 68,17862012 | 8 |
| ENSGALG00000001879 |         | 1,337810461 | 2,692005897 | 0,827824211 | 4,113696738 | 8 |
| ENSGALG00000002308 | COMMD10 | 64,65931335 | 63,73727871 | 52,43554159 | 65,08224    | 8 |
| ENSGALG00000002451 |         | 7,892336133 | 8,433004452 | 5,368002869 | 9,378353576 | 8 |
| ENSGALG00000002832 | IFI35   | 13,41565324 | 19,92428156 | 5,840906287 | 20,84894169 | 8 |
| ENSGALG00000003282 | STAT5B  | 43,47011723 | 59,21868599 | 36,01354452 | 61,71799679 | 8 |
| ENSGALG00000003404 |         | 16,38506125 | 22,47425288 | 10,42923248 | 26,49809005 | 8 |
| ENSGALG00000003457 | CNP     | 27,91472575 | 24,76733122 | 21,15447525 | 35,31883756 | 8 |
| ENSGALG00000004309 | GDAP1L1 | 24,07708294 | 28,27887319 | 14,31439188 | 29,41749102 | 8 |
| ENSGALG00000004518 |         | 5,456576175 | 5,358687351 | 3,636599085 | 5,328686101 | 8 |
| ENSGALG00000004537 |         | 180,6757873 | 161,8033161 | 121,9790746 | 175,016988  | 8 |
| ENSGALG00000004725 |         | 82,94245202 | 95,93644244 | 69,23109947 | 97,51285509 | 8 |
| ENSGALG00000004741 | EPHB2   | 47,80916319 | 49,45118607 | 31,7185343  | 48,00633611 | 8 |
| ENSGALG00000004775 |         | 9,40967762  | 9,784964463 | 6,248181276 | 9,515999548 | 8 |
| ENSGALG00000004875 | PEMT    | 36,58111755 | 49,2637599  | 28,18151635 | 49,03587614 | 8 |
| ENSGALG00000004902 | TOM1L2  | 47,90888274 | 54,14283223 | 38,4291727  | 56,34056348 | 8 |
| ENSGALG00000004936 | GLRA4   | 0,79751784  | 0,927900085 | 0,1832244   | 1,510310992 | 8 |
| ENSGALG00000005297 | HHATL   | 3,387077303 | 2,668515935 | 1,79964287  | 6,359255378 | 8 |
| ENSGALG00000005330 | SNCAIP  | 8,488103316 | 16,17894196 | 6,249057345 | 16,83568789 | 8 |
| ENSGALG00000005628 | COL9A3  | 17,96213617 | 15,94826923 | 10,69613986 | 17,40578323 | 8 |
| ENSGALG00000005751 |         | 5,36854481  | 5,781142754 | 3,794119758 | 5,564424762 | 8 |
| ENSGALG00000005820 | RNF130  | 115,9755276 | 132,7019958 | 96,44159114 | 135,6127204 | 8 |
| ENSGALG00000005930 | PLS3    | 207,3820465 | 213,2667153 | 176,3834995 | 205,374161  | 8 |
| ENSGALG00000006152 |         | 21,62598292 | 24,37801658 | 13,1869189  | 22,40566092 | 8 |
| ENSGALG00000006245 |         | 7,594383946 | 6,44434218  | 3,155446769 | 11,38846586 | 8 |
| ENSGALG00000006346 | CXCL14  | 20,0059794  | 16,52261414 | 9,684803529 | 17,74246896 | 8 |
| ENSGALG00000006453 |         | 23,05683828 | 28,21009978 | 15,71140953 | 28,93303717 | 8 |
| ENSGALG00000006480 | TCF7    | 40,96204917 | 40,44824339 | 28,05334558 | 52,25914443 | 8 |
| ENSGALG00000006507 | CLMP    | 11,08247747 | 10,29291948 | 5,480177048 | 10,05172185 | 8 |
| ENSGALG00000006702 | MFGE8   | 21,72913025 | 18,25785553 | 16,69202306 | 24,14199294 | 8 |
| ENSGALG00000006793 |         | 4,520154861 | 4,229306859 | 2,448533311 | 5,022349685 | 8 |
| ENSGALG00000006885 |         | 193,6654886 | 228,2465968 | 140,0387935 | 217,4857151 | 8 |
| ENSGALG00000007388 |         | 3,861549661 | 3,783674214 | 1,646524718 | 3,861815162 | 8 |
| ENSGALG00000007447 | TUBB1   | 7,115252041 | 6,858661343 | 4,858476059 | 6,983463694 | 8 |
| ENSGALG00000007623 | CACNA1G | 9,626950958 | 10,78838576 | 5,504792009 | 10,1006864  | 8 |
| ENSGALG00000007981 | CLN6    | 46,70691407 | 61,89784382 | 34,14706975 | 59,56872405 | 8 |
| ENSGALG00000008188 | TRIM36  | 1,365256301 | 2,320330846 | 0,507058176 | 2,908026625 | 8 |
| ENSGALG00000008250 |         | 2,334382918 | 2,222336548 | 1,211757734 | 2,093247638 | 8 |
| ENSGALG00000008349 | LMCD1   | 6,381606237 | 5,950498424 | 3,175987053 | 6,800362349 | 8 |
| ENSGALG00000008367 | MDK     | 538,002912  | 538,5537481 | 348,2539918 | 523,7018112 | 8 |
| ENSGALG00000008433 |         | 49,98160633 | 63,0842024  | 33,53067368 | 59,10964698 | 8 |
| ENSGALG00000008440 | CHST1   | 6,557087603 | 7,782559043 | 2,575428704 | 8,796610773 | 8 |
| ENSGALG00000008479 | PLEKHM3 | 7,425884037 | 8,009813156 | 4,951758076 | 8,469638599 | 8 |
| ENSGALG00000008888 |         | 2,717591914 | 3,726185576 | 1,209465832 | 4,278582904 | 8 |

|                    |          |             |             |             |             |   |
|--------------------|----------|-------------|-------------|-------------|-------------|---|
| ENSGALG00000008953 | AASS     | 2,104289207 | 3,485597766 | 1,298976223 | 3,507044234 | 8 |
| ENSGALG00000009060 |          | 55,52198203 | 50,99564319 | 43,7247881  | 55,32060319 | 8 |
| ENSGALG00000009237 |          | 3,961438611 | 0,772111634 | 1,60979255  | 4,327297542 | 8 |
| ENSGALG00000009638 | ANO6     | 1,715961455 | 1,740638076 | 0,68045043  | 1,500474705 | 8 |
| ENSGALG00000010083 | ST3GAL3  | 50,26691798 | 46,55220626 | 40,90820647 | 47,83758969 | 8 |
| ENSGALG00000010316 | FRAS1    | 14,37701744 | 14,44809891 | 10,14312586 | 16,86422595 | 8 |
| ENSGALG00000010500 | NKX6-2   | 82,02997841 | 72,56241153 | 39,76739828 | 74,26592223 | 8 |
| ENSGALG00000010551 | CDC42EP3 | 32,94479902 | 38,50554976 | 20,60412631 | 41,86968279 | 8 |
| ENSGALG00000010706 |          | 15,94984957 | 17,60812199 | 13,24497666 | 20,76705437 | 8 |
| ENSGALG00000010750 |          | 90,15991016 | 92,3598817  | 69,55665579 | 93,56553739 | 8 |
| ENSGALG00000010811 | LGMN     | 104,6799372 | 108,867442  | 72,91205227 | 103,5052655 | 8 |
| ENSGALG00000011324 |          | 645,0588375 | 753,4902301 | 447,1398409 | 797,1195948 | 8 |
| ENSGALG00000011409 | SNRPF    | 537,0729519 | 537,2486928 | 446,0636939 | 526,1919388 | 8 |
| ENSGALG00000011951 |          | 4348,85487  | 4582,468074 | 3827,371123 | 4750,322822 | 8 |
| ENSGALG00000012165 | DLGAP5   | 180,1309956 | 166,0315001 | 151,8503163 | 181,618057  | 8 |
| ENSGALG00000012546 | MCM5     | 377,5873693 | 349,3150659 | 303,0517423 | 394,3894071 | 8 |
| ENSGALG00000012577 | FRMD3    | 8,135128562 | 10,76858863 | 5,124147526 | 10,54811856 | 8 |
| ENSGALG00000012586 | GKAP1    | 49,38065987 | 48,31048476 | 35,18915075 | 46,61458231 | 8 |
| ENSGALG00000012644 |          | 118,2208301 | 107,161874  | 82,58924356 | 124,3352882 | 8 |
| ENSGALG00000012710 | NCS1     | 53,38605119 | 59,47857108 | 35,31604687 | 59,30108349 | 8 |
| ENSGALG00000012712 | RBM24    | 11,69804863 | 12,65506283 | 7,511658153 | 13,38509159 | 8 |
| ENSGALG00000012792 | HIPK2    | 34,10544651 | 47,51606445 | 28,0810563  | 48,57650721 | 8 |
| ENSGALG00000013370 |          | 19,96508379 | 17,82198179 | 14,85078035 | 19,24758448 | 8 |
| ENSGALG00000013784 | CDT1     | 165,2005614 | 151,8783838 | 132,5244372 | 174,9558592 | 8 |
| ENSGALG00000013848 | MVK      | 80,28802642 | 88,74775882 | 66,89244986 | 85,71101038 | 8 |
| ENSGALG00000014408 | LLGL1    | 136,7318583 | 150,9541375 | 116,2058785 | 148,1708454 | 8 |
| ENSGALG00000014818 | TRIM45   | 13,13116048 | 11,86036513 | 9,402249388 | 13,7018197  | 8 |
| ENSGALG00000014910 | COLEC12  | 36,98106275 | 49,28334328 | 26,80255957 | 46,75071046 | 8 |
| ENSGALG00000014970 | FSTL1    | 400,311328  | 408,6417616 | 314,2104498 | 430,8721221 | 8 |
| ENSGALG00000015082 | RPS6     | 3517,307527 | 3686,176035 | 3027,546214 | 3739,458637 | 8 |
| ENSGALG00000015084 | IGSF11   | 7,264231584 | 9,578005382 | 3,591960257 | 11,29906875 | 8 |
| ENSGALG00000015107 | PIP5K1B  | 18,92175169 | 18,57005395 | 13,47044353 | 20,52336847 | 8 |
| ENSGALG00000015186 |          | 14,74535991 | 21,55944147 | 7,489188851 | 20,8815943  | 8 |
| ENSGALG00000015326 | CLTA     | 267,2978304 | 294,1857064 | 219,3695547 | 329,8482612 | 8 |
| ENSGALG00000015372 | ATP5I    | 403,7583558 | 509,6131573 | 333,1327727 | 501,0696761 | 8 |
| ENSGALG00000015379 | TAGLN3   | 87,81368477 | 100,9944499 | 62,06751842 | 113,9094292 | 8 |
| ENSGALG00000015469 |          | 20,37996053 | 36,86257283 | 15,57629849 | 36,01578911 | 8 |
| ENSGALG00000015597 |          | 5,227904206 | 3,833284117 | 3,037151249 | 4,594564421 | 8 |
| ENSGALG00000015617 | RPS23    | 2617,899457 | 2862,618867 | 2286,280255 | 2782,266287 | 8 |
| ENSGALG00000015663 | HSDL2    | 133,5386111 | 139,1086821 | 101,7937975 | 136,1974338 | 8 |
| ENSGALG00000015729 | LPAR1    | 21,41474649 | 23,35821948 | 13,55389449 | 24,06974178 | 8 |
| ENSGALG00000015895 | HTR1B    | 25,76646903 | 23,82650311 | 19,0394431  | 23,92584621 | 8 |
| ENSGALG00000015926 |          | 5,567947829 | 7,134824852 | 3,268581878 | 6,673131012 | 8 |
| ENSGALG00000016152 |          | 183,9160675 | 192,1318333 | 138,2517808 | 212,5560354 | 8 |
| ENSGALG00000016328 |          | 83,28263556 | 147,5069832 | 61,86336813 | 143,313037  | 8 |
| ENSGALG00000016665 | FDFT1    | 96,95097122 | 82,48027441 | 75,2834769  | 99,1418902  | 8 |
| ENSGALG00000016692 |          | 85,88865234 | 83,54926437 | 67,04372699 | 83,5908187  | 8 |
| ENSGALG00000021174 |          | 57,3355086  | 57,82250149 | 43,91995666 | 55,54606164 | 8 |
| ENSGALG00000021365 | DCTN3    | 212,9718058 | 222,1596474 | 170,2155642 | 239,7819731 | 8 |
| ENSGALG00000022926 | GPR162   | 43,58694006 | 47,89104575 | 31,47238754 | 49,14485034 | 8 |
| ENSGALG00000023435 | GATM     | 10,90557171 | 11,56749101 | 7,424217313 | 11,9559467  | 8 |
| ENSGALG00000023577 |          | 3,448939012 | 3,331537676 | 0,899477294 | 6,243389678 | 8 |
| ENSGALG00000023626 | NTN1     | 24,02953412 | 32,21432394 | 16,58916643 | 33,96160684 | 8 |
| ENSGALG00000023689 | ASS1     | 1,249320069 | 1,92940501  | 0,417616289 | 1,950364347 | 8 |
| ENSGALG00000023801 |          | 3,651253916 | 2,716726028 | 0,815991185 | 2,845431632 | 8 |
| ENSGALG00000023936 |          | 14,3827097  | 16,65315064 | 9,644678815 | 19,86677939 | 8 |
| ENSGALG00000025764 | FKBP10   | 34,79818805 | 41,73571023 | 28,05073896 | 46,92463723 | 8 |
| ENSGALG00000025919 |          | 20,97538621 | 16,70085792 | 12,13546828 | 23,20345206 | 8 |
| ENSGALG00000026081 | RBM38    | 44,21346634 | 48,37930983 | 34,01608481 | 53,55787387 | 8 |
| ENSGALG00000026203 | FAM174A  | 27,05573691 | 28,32165205 | 20,54054072 | 27,04979678 | 8 |
| ENSGALG00000026291 |          | 44,51892603 | 46,84798811 | 36,7820635  | 50,21922775 | 8 |
| ENSGALG00000026300 |          | 417,310051  | 435,3420646 | 350,8924467 | 463,9459697 | 8 |

|                     |          |             |             |             |             |   |
|---------------------|----------|-------------|-------------|-------------|-------------|---|
| ENSGALG00000026449  |          | 234,0396809 | 311,3452264 | 183,6563344 | 320,9495089 | 8 |
| ENSGALG00000026517  | RFC5     | 156,0885731 | 158,5361803 | 126,8196552 | 169,2035955 | 8 |
| ENSGALG00000026919  |          | 2,441650333 | 2,953248286 | 1,625810597 | 2,961202745 | 8 |
| ENSGALG00000027462  | P3H4     | 17,15905149 | 24,46370473 | 12,9024833  | 25,92857528 | 8 |
| ENSGALG00000027501  | ANPEP    | 12,01379711 | 10,03763968 | 6,221923555 | 14,47536557 | 8 |
| ENSGALG00000027710  |          | 118,024832  | 134,7918283 | 96,52690233 | 134,4618088 | 8 |
| ENSGALG00000027824  |          | 76,49717615 | 91,19420938 | 59,38902312 | 87,936403   | 8 |
| ENSGALG00000027917  |          | 29,58120555 | 28,64651933 | 24,83745695 | 28,98249309 | 8 |
| ENSGALG00000027963  | COX7C    | 177,2982167 | 215,1096727 | 146,7488079 | 208,9018198 | 8 |
| ENSGALG00000028470  |          | 29,51653543 | 32,02852181 | 23,47533065 | 32,21145656 | 8 |
| ENSGALG00000028543  | FGFR4    | 15,68663076 | 14,79137651 | 9,453274085 | 15,46542694 | 8 |
| ENSGALG00000028682  | CBLN2    | 14,71375594 | 13,14190177 | 4,554452616 | 12,43147608 | 8 |
| ENSGALG00000028716  |          | 67,55341979 | 61,61072026 | 54,87200105 | 66,7873307  | 8 |
| ENSGALG00000028795  |          | 18,82719941 | 21,71314579 | 12,37729026 | 28,90667954 | 8 |
| ENSGALG00000029019  |          | 0,071552757 | 0,02569526  | 0,013204207 | 0,059434845 | 8 |
| ENSGALG00000029174  |          | 27,89925869 | 54,48511253 | 20,36078384 | 65,69049819 | 8 |
| ENSGALG00000000044  | WFIKKN1  | 31,25400692 | 17,05051776 | 18,3375194  | 16,23160749 | 9 |
| ENSGALG000000000161 | ISOC1    | 46,60655276 | 39,59532572 | 35,69279471 | 37,31603953 | 9 |
| ENSGALG000000000528 |          | 57,8074608  | 48,44024498 | 44,75009669 | 37,2413949  | 9 |
| ENSGALG000000000587 |          | 10,87385763 | 7,033016405 | 7,125083511 | 6,717576626 | 9 |
| ENSGALG000000000619 | ANGPTL4  | 19,0867957  | 11,9712835  | 14,11823462 | 10,50099385 | 9 |
| ENSGALG000000000623 |          | 123,5225802 | 85,31962828 | 80,7882465  | 78,48784073 | 9 |
| ENSGALG000000000628 |          | 30,5489741  | 20,87801046 | 22,15847088 | 20,43363063 | 9 |
| ENSGALG000000000644 |          | 27,34191038 | 15,24672665 | 17,77134235 | 13,4679886  | 9 |
| ENSGALG000000000681 | PAK1     | 19,8427259  | 17,46535245 | 16,20668324 | 17,09279966 | 9 |
| ENSGALG000000000684 | KLHDC8A  | 52,21088274 | 37,62714869 | 41,16059659 | 28,61108362 | 9 |
| ENSGALG000000000690 | GDPD4    | 108,6457182 | 52,11130181 | 64,04614044 | 41,17074748 | 9 |
| ENSGALG000000000750 |          | 5,480945592 | 4,028561748 | 3,354812383 | 4,175923743 | 9 |
| ENSGALG000000000780 |          | 100,949447  | 93,14132877 | 82,50393208 | 63,461697   | 9 |
| ENSGALG000000000927 | ANGPTL2  | 12,96678898 | 9,307183466 | 8,306381085 | 6,636659284 | 9 |
| ENSGALG000000000939 |          | 88,7332569  | 65,62779965 | 64,03714459 | 58,49544371 | 9 |
| ENSGALG00000001063  |          | 9,161939454 | 6,091395269 | 4,295525218 | 4,422690334 | 9 |
| ENSGALG00000001141  | HES5     | 1418,60207  | 1112,884661 | 1038,241962 | 898,373404  | 9 |
| ENSGALG00000001153  | AUTS2    | 115,680856  | 92,03951073 | 73,84336585 | 81,27424337 | 9 |
| ENSGALG00000001516  |          | 36,66443788 | 25,78277742 | 22,91121743 | 22,30922256 | 9 |
| ENSGALG00000001733  | LRIG2    | 69,99915275 | 58,54048669 | 55,02885328 | 46,10602716 | 9 |
| ENSGALG00000001774  | NEO1     | 144,6407555 | 114,9123423 | 104,6053004 | 85,78682404 | 9 |
| ENSGALG00000001954  | APTX     | 80,10762546 | 60,11975832 | 63,03128633 | 55,10270093 | 9 |
| ENSGALG00000002090  | GPSM2    | 133,1906718 | 117,2282647 | 113,4776413 | 103,8677502 | 9 |
| ENSGALG00000002091  | ZDHHC1   | 26,3461381  | 22,81614683 | 19,80544615 | 19,55804929 | 9 |
| ENSGALG00000002228  |          | 44,10956358 | 26,8456593  | 23,99308478 | 24,50200802 | 9 |
| ENSGALG00000002249  | AGO1     | 128,6081271 | 93,61556828 | 98,265346   | 85,67338208 | 9 |
| ENSGALG00000002268  |          | 57,88933765 | 48,13784859 | 48,5939597  | 43,31254971 | 9 |
| ENSGALG00000002298  | COL8A2   | 33,36976189 | 19,29568543 | 15,36725962 | 21,08774073 | 9 |
| ENSGALG00000002317  |          | 28,69380943 | 24,97653503 | 23,05559118 | 21,56051721 | 9 |
| ENSGALG00000002375  | NOTCH1   | 137,3911419 | 112,1394882 | 91,48126487 | 99,84782244 | 9 |
| ENSGALG00000002599  | ARHGEF39 | 41,36660965 | 30,08437158 | 31,67263412 | 32,09717563 | 9 |
| ENSGALG00000002652  |          | 215,5577691 | 158,3864206 | 138,1374797 | 98,78094971 | 9 |
| ENSGALG00000002774  | TSPAN3   | 599,9764973 | 447,3646823 | 467,922637  | 392,2362777 | 9 |
| ENSGALG00000002831  | SH3PXD2B | 43,1122237  | 31,76322262 | 32,27401658 | 27,94680373 | 9 |
| ENSGALG00000002974  | SPHKAP   | 6,235148986 | 3,427073538 | 3,961823218 | 2,770629109 | 9 |
| ENSGALG00000003085  | CDK1     | 835,642788  | 711,6170086 | 717,3170313 | 734,33598   | 9 |
| ENSGALG00000003163  | GNAO1    | 161,9917225 | 108,4121059 | 105,2394616 | 85,1330615  | 9 |
| ENSGALG00000003320  |          | 2,681105339 | 1,925580202 | 1,577834384 | 1,719761201 | 9 |
| ENSGALG00000003424  | LMX1A    | 14,62572453 | 6,771825817 | 7,698712962 | 5,993144908 | 9 |
| ENSGALG00000003426  | RHBDL3   | 84,52214462 | 44,61134271 | 44,5094291  | 29,9201131  | 9 |
| ENSGALG00000003429  | PBX1     | 90,75741527 | 72,39295828 | 72,36913039 | 65,41501567 | 9 |
| ENSGALG00000003434  | C17orf75 | 116,8784541 | 77,66935733 | 68,15217644 | 55,35753847 | 9 |
| ENSGALG00000003503  | MYBL2    | 103,3422234 | 89,91141222 | 86,47418819 | 88,49615621 | 9 |
| ENSGALG00000003551  |          | 16,08587485 | 9,180770702 | 7,561269976 | 10,02134429 | 9 |
| ENSGALG00000003554  | OPTC     | 119,1239593 | 71,84161518 | 56,89099392 | 54,86320698 | 9 |
| ENSGALG00000003582  | SLC1A3   | 84,64090633 | 32,60614203 | 53,95299351 | 22,44357991 | 9 |

|                    |          |             |             |             |             |   |
|--------------------|----------|-------------|-------------|-------------|-------------|---|
| ENSGALG00000003601 | ATP2B4   | 84,10436696 | 68,83661031 | 57,81129784 | 65,5936423  | 9 |
| ENSGALG00000003763 |          | 30,39802539 | 26,39791988 | 26,01635594 | 25,84006884 | 9 |
| ENSGALG00000003782 |          | 67,52962601 | 48,8949534  | 48,05084689 | 44,1293765  | 9 |
| ENSGALG00000003837 | ADCY7    | 11,25806886 | 7,141289587 | 6,436046755 | 7,162858002 | 9 |
| ENSGALG00000003930 | APBA2    | 56,79764343 | 48,00506316 | 44,99572286 | 37,56595504 | 9 |
| ENSGALG00000003987 | TRAF4    | 24,93184967 | 18,42870213 | 17,6207474  | 15,76983074 | 9 |
| ENSGALG00000004028 | MATN4    | 4,142818748 | 1,759184805 | 2,092418693 | 1,787010196 | 9 |
| ENSGALG00000004256 |          | 117,1187154 | 94,6556023  | 78,78379073 | 61,2475351  | 9 |
| ENSGALG00000004331 |          | 78,43473809 | 47,01093113 | 44,17985984 | 35,90771284 | 9 |
| ENSGALG00000004338 |          | 184,3647772 | 126,1585532 | 128,6882618 | 115,000824  | 9 |
| ENSGALG00000004364 | ABR      | 63,93113798 | 46,56275273 | 54,95450035 | 38,63387769 | 9 |
| ENSGALG00000004400 |          | 22,88103183 | 17,29827581 | 15,39979111 | 11,65059965 | 9 |
| ENSGALG00000004464 |          | 29,2120941  | 22,14419799 | 23,17263832 | 21,18993522 | 9 |
| ENSGALG00000004516 |          | 159,5821658 | 133,8086625 | 134,3461022 | 133,3681191 | 9 |
| ENSGALG00000004530 | MMD2     | 36,22728323 | 25,45444714 | 16,61274281 | 19,35254048 | 9 |
| ENSGALG00000004621 | PREX1    | 57,87358886 | 41,24143534 | 46,0542225  | 33,12573231 | 9 |
| ENSGALG00000004790 |          | 654,3246722 | 352,1800754 | 269,3322898 | 224,3252022 | 9 |
| ENSGALG00000004954 |          | 335,5094457 | 269,4578124 | 262,8551051 | 262,2329529 | 9 |
| ENSGALG00000004986 | CERCAM   | 289,2108064 | 153,4223911 | 163,1756543 | 124,3823144 | 9 |
| ENSGALG00000005214 |          | 22,97422669 | 17,61003498 | 17,43784342 | 14,70240257 | 9 |
| ENSGALG00000005237 | FGD3     | 100,5472145 | 86,36549191 | 75,01190805 | 60,70387368 | 9 |
| ENSGALG00000005246 |          | 90,58806014 | 51,35115641 | 62,64847331 | 38,43466117 | 9 |
| ENSGALG00000005319 | CDH8     | 5,445262477 | 4,173315769 | 3,017728175 | 1,866804765 | 9 |
| ENSGALG00000005403 | DHRS11   | 99,94667899 | 73,04572469 | 64,1697335  | 58,53117191 | 9 |
| ENSGALG00000005405 |          | 31,49344217 | 26,42825252 | 25,35628462 | 25,1695081  | 9 |
| ENSGALG00000005413 |          | 17,63752439 | 7,770628589 | 5,025165513 | 4,739852004 | 9 |
| ENSGALG00000005426 | FREM1    | 4,04595993  | 2,468827971 | 2,431482695 | 2,135553458 | 9 |
| ENSGALG00000005680 |          | 9,640144343 | 7,265188978 | 6,687105253 | 7,850074723 | 9 |
| ENSGALG00000005718 | BHLHE23  | 7,660886537 | 4,527062152 | 3,141076562 | 4,207532061 | 9 |
| ENSGALG00000005739 | SCD      | 120,233915  | 71,49058858 | 95,28129954 | 82,94998739 | 9 |
| ENSGALG00000005774 |          | 107,6754727 | 75,61866044 | 66,91043187 | 46,31621048 | 9 |
| ENSGALG00000005806 | KIF24    | 14,08523354 | 11,47064874 | 9,930660996 | 9,661822978 | 9 |
| ENSGALG00000005817 |          | 40,19436852 | 33,50907622 | 33,14220262 | 32,53433765 | 9 |
| ENSGALG00000005892 |          | 231,8060061 | 154,3941218 | 131,8842244 | 122,7009004 | 9 |
| ENSGALG00000005903 | NRIP3    | 13,90935106 | 8,083012884 | 7,461017706 | 7,936189903 | 9 |
| ENSGALG00000005956 |          | 2,030478214 | 0,939634647 | 0,819765053 | 0,774947504 | 9 |
| ENSGALG00000005961 | dAK      | 237,4982121 | 209,651884  | 186,032781  | 188,3048286 | 9 |
| ENSGALG00000005975 |          | 25,36720101 | 9,858054738 | 7,549317126 | 8,015243217 | 9 |
| ENSGALG00000005989 |          | 67,30399299 | 61,24008237 | 57,66738697 | 52,15578407 | 9 |
| ENSGALG00000006037 | MCM2     | 331,6274576 | 265,1735327 | 287,4206462 | 284,4425533 | 9 |
| ENSGALG00000006094 | PHF6     | 205,6581455 | 163,1742698 | 166,1087468 | 124,9981669 | 9 |
| ENSGALG00000006158 | ACVR2B   | 187,5109516 | 161,5663473 | 141,2383772 | 119,6603309 | 9 |
| ENSGALG00000006210 |          | 681,9171879 | 337,8310196 | 285,5834543 | 265,8640383 | 9 |
| ENSGALG00000006219 | PRKAG2   | 116,4614015 | 99,89346909 | 100,664404  | 99,31929353 | 9 |
| ENSGALG00000006235 |          | 25,72391513 | 18,24632753 | 12,9330952  | 11,31001119 | 9 |
| ENSGALG00000006267 | TPX2     | 285,3239263 | 234,4828814 | 242,4073029 | 244,9347288 | 9 |
| ENSGALG00000006409 |          | 98,96573337 | 59,31551837 | 64,86590911 | 48,98443263 | 9 |
| ENSGALG00000006483 |          | 66,59212784 | 47,861138   | 53,79593876 | 41,7959226  | 9 |
| ENSGALG00000006488 | RYK      | 123,9224556 | 101,6109651 | 102,7321424 | 85,2358062  | 9 |
| ENSGALG00000006555 |          | 36,25083342 | 15,25441221 | 21,94626456 | 13,42875792 | 9 |
| ENSGALG00000006563 | SEMA3D   | 64,15874594 | 42,35039981 | 31,42366476 | 24,29139394 | 9 |
| ENSGALG00000006623 | ATP11C   | 84,40040171 | 75,82040472 | 72,31961566 | 76,48580465 | 9 |
| ENSGALG00000006634 |          | 312,6569359 | 230,7046187 | 244,5534232 | 217,9314324 | 9 |
| ENSGALG00000006666 | BPIFB2   | 12,13866269 | 7,437423024 | 6,49942857  | 7,202762558 | 9 |
| ENSGALG00000006826 | KLHL25   | 110,0451345 | 65,01099472 | 69,38138855 | 48,75260528 | 9 |
| ENSGALG00000006859 |          | 8,765240974 | 7,31641822  | 6,12271801  | 5,389653833 | 9 |
| ENSGALG00000007245 |          | 27,97164142 | 18,0114389  | 18,55377799 | 13,50467657 | 9 |
| ENSGALG00000007254 | ARHGAP12 | 45,44941843 | 33,57720882 | 36,21730402 | 30,37036253 | 9 |
| ENSGALG00000007269 | GABRA3   | 13,96411172 | 10,86879485 | 9,501500127 | 8,542584012 | 9 |
| ENSGALG00000007304 |          | 34,23812047 | 29,61794147 | 25,721381   | 25,45594431 | 9 |
| ENSGALG00000007419 | MASP1    | 1,57539922  | 0,938984074 | 0,512908118 | 0,711741724 | 9 |
| ENSGALG00000007668 | BMP7     | 76,36611621 | 53,6951202  | 61,40584973 | 54,13905456 | 9 |



|                    |            |             |             |             |             |   |
|--------------------|------------|-------------|-------------|-------------|-------------|---|
| ENSGALG00000007710 |            | 99,30828406 | 71,94323354 | 71,27438268 | 46,25151534 | 9 |
| ENSGALG00000007781 | GAL3ST1    | 14,13111353 | 9,3883292   | 5,772312125 | 6,986217646 | 9 |
| ENSGALG00000007892 | SPAG6      | 61,11626497 | 47,97350969 | 39,2464153  | 36,4836125  | 9 |
| ENSGALG00000007929 | DIXDC1     | 68,58037619 | 48,0580845  | 38,09909643 | 29,97386629 | 9 |
| ENSGALG00000008174 |            | 124,348004  | 107,8743784 | 104,2337788 | 99,6087797  | 9 |
| ENSGALG00000008215 |            | 50,38257469 | 31,52731813 | 20,60181027 | 23,6834746  | 9 |
| ENSGALG00000008279 |            | 577,5801838 | 394,4296542 | 272,5352455 | 249,8305959 | 9 |
| ENSGALG00000008425 |            | 14,69561107 | 12,47619676 | 11,11587652 | 9,119602956 | 9 |
| ENSGALG00000008525 | ABHD12     | 51,3904353  | 43,30549983 | 40,64464425 | 38,93553863 | 9 |
| ENSGALG00000008616 |            | 156,5243897 | 126,1365769 | 136,68892   | 104,2885426 | 9 |
| ENSGALG00000008698 | MGME1      | 71,41290823 | 58,06460253 | 56,79294211 | 53,48784783 | 9 |
| ENSGALG00000008758 |            | 124,4228967 | 82,10905734 | 98,0079813  | 61,64666093 | 9 |
| ENSGALG00000008871 |            | 80,84342079 | 47,41819894 | 54,93095143 | 39,863161   | 9 |
| ENSGALG00000008873 | POLE3      | 321,2902245 | 262,7556375 | 240,5475354 | 218,3913542 | 9 |
| ENSGALG00000008887 |            | 33,84974642 | 27,03979324 | 26,04572531 | 22,59057103 | 9 |
| ENSGALG00000008896 |            | 6,022737193 | 3,499565077 | 2,398429886 | 2,115469582 | 9 |
| ENSGALG00000008961 |            | 138,0057818 | 67,99395964 | 89,6981597  | 52,304204   | 9 |
| ENSGALG00000009020 | JAG1       | 124,7023905 | 75,41664337 | 74,13724728 | 55,83821036 | 9 |
| ENSGALG00000009027 | ST6GALNAC3 | 29,42036569 | 25,27116058 | 20,59626824 | 18,22933473 | 9 |
| ENSGALG00000009207 | TRIM2      | 30,67711925 | 25,11356027 | 21,42653595 | 15,16568337 | 9 |
| ENSGALG00000009279 | SFMBT2     | 10,91446674 | 6,537015591 | 7,691053349 | 7,838415429 | 9 |
| ENSGALG00000009474 |            | 165,3825058 | 136,4697521 | 134,2634588 | 138,1460328 | 9 |
| ENSGALG00000009514 | NRCAM      | 42,45191179 | 20,00427649 | 23,8798494  | 14,18976528 | 9 |
| ENSGALG00000009516 |            | 41,86000548 | 32,23669772 | 30,81092781 | 28,62779004 | 9 |
| ENSGALG00000009619 |            | 40,1118097  | 32,22391492 | 31,93240207 | 32,85425266 | 9 |
| ENSGALG00000009626 | THBS1      | 45,34052685 | 25,28042099 | 27,54267112 | 21,88710977 | 9 |
| ENSGALG00000009732 | PCDH18     | 41,0860473  | 31,86811586 | 23,36024215 | 21,9012931  | 9 |
| ENSGALG00000010097 | GATB       | 32,46219309 | 27,21579359 | 23,9674918  | 19,30756619 | 9 |
| ENSGALG00000010170 | INTU       | 36,14029054 | 26,89626511 | 28,52273715 | 23,97967786 | 9 |
| ENSGALG00000010312 | PLCH1      | 44,07417619 | 31,12405937 | 36,06839209 | 29,68185375 | 9 |
| ENSGALG00000010346 | TGFB3      | 93,98664535 | 76,02551444 | 69,58015827 | 79,88767103 | 9 |
| ENSGALG00000010448 | LTBP1      | 245,7170762 | 174,8131199 | 213,6709569 | 130,4004299 | 9 |
| ENSGALG00000010598 | KCNK10     | 7,855388034 | 3,90410236  | 4,553758606 | 2,460899286 | 9 |
| ENSGALG00000010674 | DCTD       | 192,9283112 | 144,6806116 | 152,1865547 | 117,8680635 | 9 |
| ENSGALG00000010700 | RPA3       | 260,5499153 | 214,8768156 | 223,3044233 | 200,2168515 | 9 |
| ENSGALG00000010705 | ZBTB18     | 44,10376849 | 24,51748535 | 31,58377038 | 25,0157285  | 9 |
| ENSGALG00000010775 |            | 12,70190269 | 9,002694914 | 7,808452185 | 6,029336459 | 9 |
| ENSGALG00000010798 | DHCR24     | 54,13550003 | 46,53369275 | 42,79643706 | 47,16973778 | 9 |
| ENSGALG00000010818 | PLPP3      | 69,29865779 | 48,32497394 | 49,3012161  | 41,06142891 | 9 |
| ENSGALG00000010825 | AGR2       | 2,225899698 | 0,437850605 | 0,260687102 | 0,445933444 | 9 |
| ENSGALG00000010829 |            | 167,2465489 | 136,4200703 | 138,2033727 | 116,3988713 | 9 |
| ENSGALG00000010835 | DTX4       | 1195,686573 | 840,6890347 | 831,069909  | 723,909037  | 9 |
| ENSGALG00000010903 |            | 30,51325584 | 19,6495363  | 18,42950404 | 14,34456426 | 9 |
| ENSGALG00000010960 | GALNT3     | 20,3476324  | 13,46078214 | 12,92983377 | 9,283859309 | 9 |
| ENSGALG00000010971 | CSRNP3     | 17,1320569  | 10,94668327 | 12,37192759 | 9,463981496 | 9 |
| ENSGALG00000011109 | MAPK10     | 10,6059035  | 8,201546462 | 6,224593472 | 6,370787412 | 9 |
| ENSGALG00000011182 | DLL1       | 115,6739078 | 83,57962434 | 66,45209234 | 63,60645287 | 9 |
| ENSGALG00000011206 | KITLG      | 22,29167397 | 16,26019056 | 12,14019114 | 12,29957305 | 9 |
| ENSGALG00000011571 | AGPAT4     | 93,67204267 | 68,94234947 | 78,24764951 | 60,3321412  | 9 |
| ENSGALG00000011823 | FAT4       | 25,5685505  | 20,27150072 | 15,35641303 | 12,56335526 | 9 |
| ENSGALG00000012017 | DAAM1      | 66,51638573 | 51,6956635  | 46,97005806 | 42,50632291 | 9 |
| ENSGALG00000012121 | RCN1       | 128,2812544 | 85,34230795 | 104,339948  | 73,50530684 | 9 |
| ENSGALG00000012123 | PAX6       | 207,3310704 | 125,6192176 | 94,53567349 | 104,5564319 | 9 |
| ENSGALG00000012124 | PELI2      | 97,01672853 | 72,38390338 | 68,07241714 | 72,99638735 | 9 |
| ENSGALG00000012130 | DNAJC24    | 87,42750265 | 67,82813268 | 67,26018354 | 54,6134636  | 9 |
| ENSGALG00000012184 |            | 17,53434364 | 10,51607147 | 5,571243627 | 4,897927265 | 9 |
| ENSGALG00000012216 | BMPR1B     | 19,73470606 | 17,41660439 | 14,638607   | 11,03804069 | 9 |
| ENSGALG00000012226 |            | 10,14170208 | 6,091780586 | 5,829669854 | 4,876167191 | 9 |
| ENSGALG00000012332 |            | 1,75499313  | 0,334938857 | 0,049686386 | 0,405453413 | 9 |
| ENSGALG00000012361 | NIN        | 38,54121987 | 30,6965853  | 28,85722382 | 29,36252216 | 9 |
| ENSGALG00000012388 | PCMT1      | 114,9803287 | 97,79226505 | 96,7908776  | 85,73985935 | 9 |
| ENSGALG00000012395 | PLEKHG1    | 40,97672463 | 34,45473513 | 31,88510956 | 26,43661125 | 9 |

|                    |         |             |             |             |             |   |
|--------------------|---------|-------------|-------------|-------------|-------------|---|
| ENSGALG00000012440 |         | 126,942135  | 81,54303435 | 74,69736259 | 83,67449226 | 9 |
| ENSGALG00000012595 | AGTPBP1 | 5,843425877 | 3,87973109  | 3,244881839 | 3,714060964 | 9 |
| ENSGALG00000012618 | FANCC   | 77,15501466 | 61,95447317 | 63,86958208 | 59,5116733  | 9 |
| ENSGALG00000012620 | PTCH1   | 128,0187265 | 79,01327975 | 78,98591949 | 63,93344831 | 9 |
| ENSGALG00000012662 | NUAK1   | 65,54806121 | 48,25369742 | 54,49515428 | 35,50923797 | 9 |
| ENSGALG00000012684 | DEK     | 213,1310822 | 191,1534846 | 182,5897587 | 191,0382858 | 9 |
| ENSGALG00000012697 | SLC41A2 | 0,058029502 | 0,037541976 | 0,025719414 | 0,034391684 | 9 |
| ENSGALG00000012703 | DTNBP1  | 65,11808287 | 60,06352135 | 53,570554   | 45,8855677  | 9 |
| ENSGALG00000012756 | PARPBP  | 8,741901058 | 7,493838313 | 6,914878548 | 5,358083966 | 9 |
| ENSGALG00000012775 | TFAP2A  | 8,004715347 | 5,508538021 | 5,589140758 | 6,133219794 | 9 |
| ENSGALG00000012936 |         | 43,2525541  | 33,16536089 | 32,41777008 | 26,8771372  | 9 |
| ENSGALG00000013155 |         | 60,96549085 | 50,10471915 | 41,405435   | 39,39397896 | 9 |
| ENSGALG00000013211 | Sial-T2 | 53,06870305 | 39,2868121  | 36,22341479 | 29,76988665 | 9 |
| ENSGALG00000013212 |         | 352,0737733 | 218,2231586 | 304,4999677 | 177,1428711 | 9 |
| ENSGALG00000013357 |         | 14,5238095  | 9,676299999 | 9,468806965 | 11,33051766 | 9 |
| ENSGALG00000013672 | TSHZ1   | 47,63040303 | 40,01248352 | 37,12051956 | 40,35485231 | 9 |
| ENSGALG00000013722 | SEMA3B  | 67,72409615 | 45,67603936 | 47,22283227 | 43,11405926 | 9 |
| ENSGALG00000013754 |         | 99,90845036 | 74,32231981 | 73,38471802 | 63,38796719 | 9 |
| ENSGALG00000013756 |         | 9,551795017 | 8,012150023 | 7,152967635 | 6,59881996  | 9 |
| ENSGALG00000013782 | CDH7    | 44,73753961 | 24,83144713 | 33,13366661 | 19,36298515 | 9 |
| ENSGALG00000013900 | MAP7    | 18,05284523 | 9,552077542 | 7,566128142 | 7,59934912  | 9 |
| ENSGALG00000013961 |         | 56,10973329 | 47,74639425 | 42,56173827 | 38,2782928  | 9 |
| ENSGALG00000014069 | TP53I11 | 462,0420259 | 303,2892015 | 318,9636775 | 276,2729485 | 9 |
| ENSGALG00000014100 |         | 7,763915083 | 3,510610015 | 2,846977556 | 4,067062932 | 9 |
| ENSGALG00000014218 | PHF21B  | 44,41267673 | 32,88106133 | 33,30902396 | 23,77376394 | 9 |
| ENSGALG00000014284 |         | 25,24429229 | 20,35052461 | 20,85799387 | 23,81657043 | 9 |
| ENSGALG00000014347 |         | 21,79724499 | 18,61697194 | 16,21325842 | 13,48321788 | 9 |
| ENSGALG00000014485 | LDB2    | 58,65859245 | 44,03980556 | 38,92048977 | 32,99839391 | 9 |
| ENSGALG00000014508 | CD38    | 34,52009233 | 22,68968774 | 20,56010187 | 19,01534557 | 9 |
| ENSGALG00000014620 |         | 1,956048892 | 0,782889319 | 0,862399115 | 0,580997363 | 9 |
| ENSGALG00000014646 | SYT11   | 171,4109919 | 151,5937547 | 140,9231322 | 134,8023289 | 9 |
| ENSGALG00000014672 | ARSK    | 14,70009358 | 11,78884508 | 10,76404571 | 9,602709952 | 9 |
| ENSGALG00000014680 |         | 24,0520188  | 19,83747893 | 17,85066188 | 16,91394554 | 9 |
| ENSGALG00000014753 | CENPK   | 106,4544342 | 83,51630756 | 81,07856229 | 90,52213786 | 9 |
| ENSGALG00000014756 | PPWD1   | 129,0762799 | 102,4153578 | 107,5831259 | 108,0635267 | 9 |
| ENSGALG00000014829 |         | 15,02253293 | 10,43374439 | 6,545915045 | 6,828450455 | 9 |
| ENSGALG00000014897 | TYMS    | 276,8568161 | 246,1181255 | 233,2358706 | 234,7946898 | 9 |
| ENSGALG00000014903 | ITGA2   | 19,28102901 | 12,04416315 | 14,06402156 | 10,26187687 | 9 |
| ENSGALG00000014934 | HS3ST1  | 5,540861535 | 3,210938472 | 2,425738011 | 1,67621552  | 9 |
| ENSGALG00000015053 | GLDC    | 65,20466566 | 54,00282438 | 55,14865591 | 47,938418   | 9 |
| ENSGALG00000015091 | HAUS6   | 107,8740638 | 77,47610692 | 90,80409523 | 80,42181649 | 9 |
| ENSGALG00000015103 | CCDC171 | 9,278746716 | 7,442349244 | 6,81158066  | 5,688912777 | 9 |
| ENSGALG00000015152 | BOC     | 61,37451521 | 50,47041324 | 41,88963775 | 37,19576843 | 9 |
| ENSGALG00000015241 |         | 34,52994734 | 20,74355677 | 21,80562309 | 14,0162192  | 9 |
| ENSGALG00000015386 | RNF170  | 48,11695973 | 40,96561413 | 36,04033923 | 29,04558532 | 9 |
| ENSGALG00000015444 |         | 17,77233078 | 14,64411238 | 13,67274692 | 12,36829449 | 9 |
| ENSGALG00000015448 |         | 26,99122737 | 19,26894575 | 15,38003926 | 10,64663709 | 9 |
| ENSGALG00000015476 |         | 14,64646726 | 7,865669198 | 7,720149158 | 5,783165827 | 9 |
| ENSGALG00000015564 |         | 7,156970347 | 5,334313058 | 5,500962035 | 4,919475757 | 9 |
| ENSGALG00000015673 |         | 19,31944035 | 13,00690578 | 11,37988935 | 9,833987567 | 9 |
| ENSGALG00000015685 | CFAP99  | 9,786223813 | 7,029241391 | 6,950135982 | 6,216729289 | 9 |
| ENSGALG00000015712 | SLBP    | 102,5760884 | 74,18453744 | 83,0184383  | 76,31708087 | 9 |
| ENSGALG00000015786 | REEP1   | 53,13915006 | 42,50403724 | 36,81544162 | 36,11332154 | 9 |
| ENSGALG00000015799 | ELAVL2  | 6,037654055 | 4,325382874 | 3,767789255 | 2,819033678 | 9 |
| ENSGALG00000015847 | PRSS35  | 35,11704576 | 25,66370192 | 24,07123267 | 19,02952064 | 9 |
| ENSGALG00000016034 | ATRN    | 111,1123874 | 81,26651019 | 87,63945569 | 67,82246842 | 9 |
| ENSGALG00000016148 | C2CD2   | 39,27360457 | 32,23641902 | 29,98843351 | 28,60296797 | 9 |
| ENSGALG00000016171 |         | 218,2787932 | 205,7354159 | 192,6760184 | 172,0707128 | 9 |
| ENSGALG00000016200 |         | 51,81097754 | 39,08952357 | 37,81925937 | 29,69260203 | 9 |
| ENSGALG00000016244 |         | 34,80907173 | 29,60541455 | 24,53665949 | 19,37430659 | 9 |
| ENSGALG00000016326 |         | 10,59842146 | 8,398086434 | 7,852987771 | 6,850555245 | 9 |
| ENSGALG00000016391 | CNKSR2  | 26,29502855 | 16,46476384 | 16,96231718 | 11,5736257  | 9 |

|                    |          |             |             |             |             |   |
|--------------------|----------|-------------|-------------|-------------|-------------|---|
| ENSGALG00000016394 |          | 32,19475368 | 17,39524143 | 21,9320163  | 17,49313991 | 9 |
| ENSGALG00000016417 |          | 131,3461383 | 103,1768005 | 104,7836855 | 88,93333367 | 9 |
| ENSGALG00000016428 |          | 98,90427495 | 50,27843955 | 39,10462421 | 33,95468388 | 9 |
| ENSGALG00000016442 | RRM2     | 593,9920997 | 471,2620483 | 469,5176719 | 463,1466191 | 9 |
| ENSGALG00000016456 | Lpin1    | 11,86024943 | 9,523941198 | 9,270708107 | 9,810098096 | 9 |
| ENSGALG00000016459 | FAM84A   | 7,093676028 | 4,179695873 | 3,107376993 | 3,325425099 | 9 |
| ENSGALG00000016487 | LDAH     | 39,21408017 | 36,90700532 | 33,03840175 | 29,58276228 | 9 |
| ENSGALG00000016497 | UBXN2A   | 68,16553674 | 58,34933795 | 51,49336847 | 45,51619727 | 9 |
| ENSGALG00000016575 | GPM6B    | 267,7110691 | 174,3280247 | 163,2139649 | 132,8150489 | 9 |
| ENSGALG00000016576 | OFD1     | 80,96250322 | 62,01808879 | 54,92287394 | 47,92994163 | 9 |
| ENSGALG00000016676 | MCM3     | 220,3958455 | 163,3016763 | 186,0877349 | 184,8337011 | 9 |
| ENSGALG00000016810 |          | 34,46474494 | 22,03432788 | 16,29129687 | 17,02120699 | 9 |
| ENSGALG00000016811 |          | 20,87242426 | 16,56591395 | 15,39201879 | 12,9699234  | 9 |
| ENSGALG00000017021 | ATP7B    | 3,9869324   | 2,371265345 | 1,829014636 | 1,212619235 | 9 |
| ENSGALG00000017154 | ZC3H12C  | 16,69008154 | 11,1294025  | 10,93196073 | 9,942631937 | 9 |
| ENSGALG00000017393 |          | 14,97893571 | 10,68802307 | 10,58952889 | 9,672886802 | 9 |
| ENSGALG00000019987 | LRP11    | 101,4977697 | 84,74657711 | 74,00932276 | 62,64430136 | 9 |
| ENSGALG00000020003 | MAP3K4   | 101,7199951 | 71,21199104 | 84,45899897 | 57,14632163 | 9 |
| ENSGALG00000020554 |          | 2,745534391 | 1,931406303 | 1,752178514 | 1,782013487 | 9 |
| ENSGALG00000020788 |          | 16,08950004 | 7,37692355  | 7,655663237 | 3,861511503 | 9 |
| ENSGALG00000020813 |          | 171,290155  | 148,1329936 | 144,4510861 | 138,3803558 | 9 |
| ENSGALG00000021031 | ACKR3    | 197,7454394 | 96,43341863 | 106,3679352 | 85,09027757 | 9 |
| ENSGALG00000021340 | CA9      | 246,544707  | 203,2768771 | 190,5602386 | 192,1909568 | 9 |
| ENSGALG00000021592 |          | 24,90805272 | 18,51353834 | 18,06631656 | 13,3222017  | 9 |
| ENSGALG00000021593 |          | 21,6290003  | 14,87215611 | 11,48507743 | 16,43767163 | 9 |
| ENSGALG00000021616 |          | 660,7892    | 560,4597192 | 492,802757  | 474,9610111 | 9 |
| ENSGALG00000022603 |          | 127,7440137 | 94,25649465 | 98,2989799  | 83,9412793  | 9 |
| ENSGALG00000023114 | TAL2     | 10,83090997 | 4,516618379 | 3,527657045 | 4,165674735 | 9 |
| ENSGALG00000023359 | BTBD17   | 12,37917296 | 9,215387972 | 6,210062578 | 6,211710478 | 9 |
| ENSGALG00000023546 |          | 103,3250361 | 82,98091285 | 85,32961236 | 77,35742371 | 9 |
| ENSGALG00000023647 |          | 16,32978445 | 10,43731524 | 9,865902217 | 8,46856396  | 9 |
| ENSGALG00000023898 |          | 25,15757129 | 20,28376564 | 21,16857225 | 21,71796482 | 9 |
| ENSGALG00000024047 | MYCL     | 130,6449284 | 91,27348025 | 100,1887482 | 78,95088543 | 9 |
| ENSGALG00000024120 |          | 251,9186613 | 186,3133705 | 184,633668  | 156,1919821 | 9 |
| ENSGALG00000025796 | ADI1     | 151,9056229 | 128,8288136 | 130,0669627 | 115,3487407 | 9 |
| ENSGALG00000026085 |          | 37,55971233 | 29,79205273 | 28,08976508 | 26,0061611  | 9 |
| ENSGALG00000026179 | FAM163B  | 12,70392319 | 7,406176596 | 6,530189162 | 10,54638186 | 9 |
| ENSGALG00000026192 | ST8SIA4  | 26,69578621 | 14,31843914 | 14,38997567 | 10,57310427 | 9 |
| ENSGALG00000026214 | LRTM2    | 5,889632729 | 3,621162228 | 2,979514896 | 2,858887818 | 9 |
| ENSGALG00000026313 | RND3     | 54,52252904 | 42,60080306 | 41,54066922 | 34,55755523 | 9 |
| ENSGALG00000026395 | TRABD2A  | 34,96858896 | 22,03852277 | 14,4142307  | 13,7208985  | 9 |
| ENSGALG00000026452 | MURC     | 68,5514329  | 42,65798561 | 57,55999236 | 40,22180647 | 9 |
| ENSGALG00000026741 |          | 92,52230306 | 78,97977067 | 79,76273285 | 68,87406566 | 9 |
| ENSGALG00000026757 |          | 115,1492891 | 83,10995002 | 78,42339249 | 85,39515762 | 9 |
| ENSGALG00000026858 | BTG2     | 73,25524576 | 56,978272   | 43,18762707 | 46,83714731 | 9 |
| ENSGALG00000026981 | NHSL1    | 90,0052068  | 79,25555686 | 72,87488074 | 70,3460249  | 9 |
| ENSGALG00000027002 |          | 335,0560184 | 189,0165812 | 223,361849  | 151,3843853 | 9 |
| ENSGALG00000027183 |          | 19,96308058 | 12,60167171 | 12,49826777 | 10,81410515 | 9 |
| ENSGALG00000027198 | TMEM47   | 68,18436645 | 46,36338174 | 41,15361629 | 45,81100202 | 9 |
| ENSGALG00000027240 | TSPAN13  | 60,13229624 | 43,7309013  | 38,32508629 | 35,23013388 | 9 |
| ENSGALG00000027373 |          | 255,2616537 | 165,0099254 | 173,1189979 | 141,526405  | 9 |
| ENSGALG00000027472 | TMEM38B  | 18,53265539 | 16,23438527 | 14,16492945 | 12,41744795 | 9 |
| ENSGALG00000027484 | C20orf85 | 5,62155177  | 3,44560581  | 2,174506144 | 2,913151077 | 9 |
| ENSGALG00000027514 |          | 0,528787008 | 0,166761415 | 0,080304322 | 0,124803265 | 9 |
| ENSGALG00000027633 | RASSF9   | 2,035731325 | 0,854912883 | 0,737308999 | 0,339184915 | 9 |
| ENSGALG00000027821 |          | 23,11507984 | 14,67663083 | 10,50775245 | 14,49954578 | 9 |
| ENSGALG00000027897 | DTX1     | 44,84876496 | 37,26651436 | 33,21350155 | 34,29440557 | 9 |
| ENSGALG00000028043 |          | 35,35893431 | 28,05893819 | 22,40021823 | 20,30301901 | 9 |
| ENSGALG00000028140 | CNTFR    | 21,29176694 | 15,68480074 | 14,7877547  | 16,3046985  | 9 |
| ENSGALG00000028327 | TMEM178A | 15,25643824 | 12,99141162 | 11,17599999 | 10,775708   | 9 |
| ENSGALG00000028415 |          | 51,81555289 | 16,42028113 | 20,4065691  | 12,36370773 | 9 |
| ENSGALG00000028536 | MPEG1    | 20,5427871  | 13,37260379 | 15,08320974 | 11,52346016 | 9 |

|                    |         |             |             |             |             |    |
|--------------------|---------|-------------|-------------|-------------|-------------|----|
| ENSGALG00000028790 | DNASE2B | 19,09091612 | 11,85162585 | 9,263964302 | 10,09521056 | 9  |
| ENSGALG00000029004 |         | 0,626344243 | 0,267590302 | 0,357524634 | 0,25546319  | 9  |
| ENSGALG00000029011 | SLC35F1 | 147,2321386 | 101,3673948 | 105,6335088 | 79,54888119 | 9  |
| ENSGALG00000029057 |         | 6,612061759 | 3,565809227 | 3,192304914 | 3,978423806 | 9  |
| ENSGALG00000029070 | FAM181A | 140,8743623 | 93,20761779 | 88,5842806  | 63,71077724 | 9  |
| ENSGALG00000029072 | NTN3    | 23,04277493 | 13,47398348 | 14,06728438 | 13,23933001 | 9  |
| ENSGALG00000029106 |         | 11,86577158 | 8,120777874 | 6,029059075 | 6,275995647 | 9  |
| ENSGALG00000029140 | CRABP2  | 943,46397   | 516,5320484 | 569,9989128 | 473,9399887 | 9  |
| ENSGALG00000029151 |         | 3,237130342 | 2,159102861 | 1,570247908 | 2,377856659 | 9  |
| ENSGALG00000000067 | SPR     | 25,19151507 | 38,09496599 | 32,36154561 | 46,01001796 | 10 |
| ENSGALG00000000243 | RDM1    | 64,16894169 | 84,57366491 | 88,19253189 | 87,07892618 | 10 |
| ENSGALG00000000505 | KCNH6   | 1,806346197 | 3,772203834 | 3,349604234 | 3,427118714 | 10 |
| ENSGALG00000000836 | RFX5    | 0,220047592 | 0,798370098 | 0,387008719 | 0,842809634 | 10 |
| ENSGALG00000000894 | APCDD1  | 12,17953658 | 20,37298423 | 18,67259013 | 21,14941456 | 10 |
| ENSGALG00000001376 | ARID3B  | 81,77846269 | 128,5884065 | 111,6210537 | 158,6263766 | 10 |
| ENSGALG00000001664 | PTPN9   | 27,32342552 | 45,33442697 | 41,5208593  | 49,78702526 | 10 |
| ENSGALG00000002054 |         | 4,463691977 | 10,11551737 | 8,122956552 | 9,768543779 | 10 |
| ENSGALG00000002210 | PPIB    | 615,7965084 | 812,398235  | 771,3773995 | 889,5451731 | 10 |
| ENSGALG00000002342 |         | 76,97404676 | 104,3309613 | 95,54319676 | 118,6337645 | 10 |
| ENSGALG00000002922 | NOTCH2  | 34,87569574 | 45,95827585 | 44,26184738 | 50,20078048 | 10 |
| ENSGALG00000002969 | MAU2    | 41,46144033 | 47,17099845 | 48,73910042 | 47,72736011 | 10 |
| ENSGALG00000003011 | TOM1L1  | 0,671138223 | 2,313862165 | 2,230320103 | 3,177873963 | 10 |
| ENSGALG00000003019 |         | 7,412203933 | 9,138713853 | 9,422655346 | 10,02764078 | 10 |
| ENSGALG00000003340 | GBGT1   | 1,301060604 | 4,566529257 | 2,549542908 | 4,535141421 | 10 |
| ENSGALG00000003562 | NPTX2   | 1,276374613 | 2,747257273 | 2,562428679 | 3,583310899 | 10 |
| ENSGALG00000003640 |         | 9,84244551  | 40,12648844 | 16,73702806 | 37,56346879 | 10 |
| ENSGALG00000003841 | DGKK    | 1,170538651 | 1,987308984 | 2,249687426 | 2,15756725  | 10 |
| ENSGALG00000004083 | GRIA1   | 6,30072857  | 18,26990907 | 15,82341279 | 17,5097179  | 10 |
| ENSGALG00000004719 | SPTAN1  | 93,79037656 | 111,3665527 | 109,9098282 | 108,9079703 | 10 |
| ENSGALG00000004740 | TMOD2   | 7,782204442 | 14,88555351 | 10,95510486 | 12,75531378 | 10 |
| ENSGALG00000004805 |         | 5,914997516 | 7,271558567 | 7,670585037 | 7,762114467 | 10 |
| ENSGALG00000004909 |         | 59,70087412 | 104,0709532 | 86,70697475 | 99,82170433 | 10 |
| ENSGALG00000005065 | PLA2G4A | 4,27041438  | 8,286182082 | 7,268353555 | 8,503620832 | 10 |
| ENSGALG00000005389 |         | 0,141856332 | 3,826903443 | 1,782989285 | 2,582117723 | 10 |
| ENSGALG00000005861 |         | 2,00701187  | 3,862514989 | 3,827339633 | 5,164782157 | 10 |
| ENSGALG00000005906 |         | 25,34069165 | 46,7681257  | 40,66967147 | 52,53393838 | 10 |
| ENSGALG00000006313 |         | 7,796058512 | 11,54622893 | 10,90957967 | 13,40926496 | 10 |
| ENSGALG00000006641 |         | 15,64772345 | 21,61228415 | 20,72433764 | 23,81644591 | 10 |
| ENSGALG00000006659 |         | 40,08388889 | 51,59649186 | 52,50217807 | 58,09914445 | 10 |
| ENSGALG00000006729 |         | 14,16368852 | 150,8222642 | 64,1838708  | 77,30692972 | 10 |
| ENSGALG00000007412 | MPZL2   | 1,426673901 | 2,603616958 | 3,116406355 | 3,436684581 | 10 |
| ENSGALG00000007543 | APCDD1L | 1,285779838 | 10,76373217 | 10,1632961  | 15,43303975 | 10 |
| ENSGALG00000007565 | PPP2R2B | 4,498606815 | 16,55729926 | 7,013796757 | 13,48424013 | 10 |
| ENSGALG00000007833 |         | 22,46417563 | 30,2369186  | 29,28165289 | 32,02014786 | 10 |
| ENSGALG00000008009 | BCAP29  | 54,09129251 | 74,79823611 | 73,83395516 | 82,24575148 | 10 |
| ENSGALG00000008181 | MADD    | 15,2172411  | 21,6887672  | 21,73612765 | 25,35030935 | 10 |
| ENSGALG00000008999 | AFAP1L2 | 5,746909958 | 16,02416497 | 14,60767657 | 23,10791907 | 10 |
| ENSGALG00000009155 |         | 6,468639196 | 11,71015107 | 12,0614327  | 12,97982335 | 10 |
| ENSGALG00000009433 | BAG3    | 43,32330391 | 89,33785815 | 65,96819578 | 99,83819404 | 10 |
| ENSGALG00000009505 | PNPLA8  | 33,57778621 | 40,98407666 | 40,30681413 | 42,47879678 | 10 |
| ENSGALG00000009570 | ATP6V1D | 74,62845941 | 128,6859866 | 102,1283936 | 130,2908971 | 10 |
| ENSGALG00000009718 | FAM53B  | 5,787080902 | 16,4568785  | 11,11024098 | 15,08477821 | 10 |
| ENSGALG00000009759 | SLC16A7 | 0,371037879 | 0,893895773 | 0,86989287  | 1,026405516 | 10 |
| ENSGALG00000009783 |         | 10,2405462  | 14,28065595 | 13,0313556  | 14,17793631 | 10 |
| ENSGALG00000009792 |         | 10,84341484 | 21,73021356 | 16,86750659 | 17,88482058 | 10 |
| ENSGALG00000009896 | TRERF1  | 4,808170267 | 13,5104085  | 7,397743277 | 15,27344774 | 10 |
| ENSGALG00000009972 |         | 8,233254639 | 14,77085833 | 10,96112463 | 12,48984776 | 10 |
| ENSGALG00000009988 | ELOVL1  | 24,54970046 | 40,25627092 | 37,95280868 | 40,63830581 | 10 |
| ENSGALG00000010164 | SMARCA2 | 31,48210827 | 48,72221196 | 46,7844494  | 57,39705613 | 10 |
| ENSGALG00000010268 |         | 4,921325317 | 13,01196961 | 15,00161538 | 16,21986662 | 10 |
| ENSGALG00000010664 | KIF26B  | 0,871077545 | 3,300649183 | 1,910395118 | 3,87997435  | 10 |
| ENSGALG00000010911 |         | 1,617219387 | 3,748364438 | 2,982354432 | 4,754746898 | 10 |

|                    |          |             |             |             |             |    |
|--------------------|----------|-------------|-------------|-------------|-------------|----|
| ENSGALG00000010934 |          | 1,8031112   | 3,709899605 | 2,91645905  | 4,653025085 | 10 |
| ENSGALG00000011016 | PGM1     | 23,44574688 | 32,53423526 | 32,62243154 | 31,85192134 | 10 |
| ENSGALG00000011286 | UBE2E1   | 62,79994395 | 81,23871675 | 90,03965196 | 96,89006504 | 10 |
| ENSGALG00000011488 | CMTM7    | 7,277427951 | 20,1323349  | 11,74053362 | 16,23963969 | 10 |
| ENSGALG00000011690 |          | 0,103946776 | 0,939637581 | 0,88149688  | 0,834198832 | 10 |
| ENSGALG00000011972 |          | 21,41005163 | 26,662867   | 28,93241264 | 30,75647977 | 10 |
| ENSGALG00000012093 |          | 12,1904691  | 23,2396876  | 16,99874812 | 22,36987224 | 10 |
| ENSGALG00000012118 | TMEM260  | 10,53321393 | 13,22765331 | 14,21926447 | 15,08071395 | 10 |
| ENSGALG00000012211 | PDLIM5   | 16,67664874 | 23,83760349 | 27,59486714 | 28,08174448 | 10 |
| ENSGALG00000012280 |          | 32,6377987  | 47,09813408 | 43,51845385 | 46,57456552 | 10 |
| ENSGALG00000012304 | NFKB1    | 18,92353309 | 36,72187679 | 23,71285028 | 29,81253681 | 10 |
| ENSGALG00000012345 | UST      | 25,98919869 | 34,81550817 | 36,11724943 | 34,83622704 | 10 |
| ENSGALG00000012877 | CREB3L2  | 14,15122188 | 29,46359767 | 22,89406436 | 24,70796898 | 10 |
| ENSGALG00000013738 | OPTN     | 31,20424125 | 63,0962501  | 64,58752569 | 83,85842847 | 10 |
| ENSGALG00000013830 | PRELID3A | 39,10486792 | 55,02903372 | 52,71471236 | 54,50673512 | 10 |
| ENSGALG00000013902 |          | 1,573316302 | 4,401902139 | 4,571135381 | 4,45045502  | 10 |
| ENSGALG00000014014 |          | 0,595599345 | 2,558484407 | 0,964881493 | 2,547986889 | 10 |
| ENSGALG00000014106 | PPFIBP1  | 48,33798078 | 79,49747287 | 78,82503111 | 87,90269502 | 10 |
| ENSGALG00000014933 | HEXB     | 13,82875151 | 27,24707297 | 21,86614475 | 28,18919125 | 10 |
| ENSGALG00000015250 |          | 6,860711489 | 17,44011316 | 12,3963785  | 12,88410587 | 10 |
| ENSGALG00000015424 |          | 48,88941571 | 72,42774461 | 65,23032901 | 67,1628436  | 10 |
| ENSGALG00000015459 |          | 19,21668801 | 24,21055023 | 25,90194667 | 25,85794579 | 10 |
| ENSGALG00000015652 | MFSD10   | 12,11072038 | 16,15790442 | 16,48891498 | 16,37173519 | 10 |
| ENSGALG00000015677 | SUSD1    | 5,974385986 | 10,6464791  | 9,370624852 | 13,62756519 | 10 |
| ENSGALG00000015770 | APP      | 380,9874972 | 492,5151558 | 458,3835411 | 482,5133678 | 10 |
| ENSGALG00000015792 |          | 8,931724434 | 14,36302132 | 13,26278114 | 14,78442869 | 10 |
| ENSGALG00000015958 | EIF2AK3  | 9,629444865 | 17,72798233 | 12,0730299  | 16,39705179 | 10 |
| ENSGALG00000016050 | TTC3     | 21,38230929 | 25,43226191 | 26,64498514 | 26,08190222 | 10 |
| ENSGALG00000016069 |          | 14,59709436 | 23,86183631 | 25,39502668 | 24,64718079 | 10 |
| ENSGALG00000016090 |          | 2,529020993 | 11,65505479 | 5,834035244 | 6,766647026 | 10 |
| ENSGALG00000016311 |          | 9,237809102 | 13,39156196 | 14,74306104 | 15,77492644 | 10 |
| ENSGALG00000016341 |          | 0,202104856 | 0,525241112 | 0,549551156 | 0,636899768 | 10 |
| ENSGALG00000017199 | MAML2    | 16,24202136 | 24,17136146 | 25,99411058 | 26,45082516 | 10 |
| ENSGALG00000017379 |          | 1,368912243 | 3,891543067 | 3,862137749 | 5,074133424 | 10 |
| ENSGALG00000017414 | JUP      | 51,88278313 | 71,84240343 | 75,80087103 | 85,42821    | 10 |
| ENSGALG00000017652 | TTC9     | 0,468001686 | 2,538977862 | 2,85619406  | 2,815917147 | 10 |
| ENSGALG00000018634 |          | 3,028664762 | 6,076484682 | 4,960409416 | 5,873704945 | 10 |
| ENSGALG00000019835 |          | 5,591831465 | 7,516668319 | 8,481902626 | 8,879886504 | 10 |
| ENSGALG00000023541 | SPHK1    | 22,91275764 | 31,05187359 | 30,31393316 | 31,95169083 | 10 |
| ENSGALG00000023806 |          | 73,79335109 | 95,32276617 | 100,6008133 | 101,5648268 | 10 |
| ENSGALG00000023886 | ZNF804A  | 1,685790356 | 4,57926496  | 3,192521495 | 4,573801224 | 10 |
| ENSGALG00000025780 | ITPRIP   | 5,385578786 | 9,094153341 | 10,15330177 | 10,84817331 | 10 |
| ENSGALG00000026184 |          | 20,45088044 | 35,45119107 | 28,32020272 | 36,40521622 | 10 |
| ENSGALG00000026694 |          | 1,351457644 | 3,212622506 | 2,533295638 | 2,645072591 | 10 |
| ENSGALG00000026727 | SLC30A10 | 1,391821025 | 2,828916703 | 2,502986912 | 3,564811485 | 10 |
| ENSGALG00000026822 | WDR81    | 18,46040207 | 24,87090381 | 24,50072815 | 25,59442237 | 10 |
| ENSGALG00000027764 |          | 2,512489522 | 9,103387834 | 10,99845138 | 12,01146352 | 10 |
| ENSGALG00000027772 |          | 0,004892914 | 0,62961338  | 0,353233983 | 0,624609016 | 10 |
| ENSGALG00000028155 |          | 5,782098605 | 11,47490998 | 10,05991248 | 10,8361757  | 10 |
| ENSGALG00000028354 | METRNL   | 37,35106289 | 58,93445961 | 46,00048458 | 56,99942589 | 10 |
| ENSGALG00000028582 |          | 3,241190702 | 10,61160058 | 7,55174664  | 14,2492626  | 10 |
| ENSGALG00000000107 | TRIM7    | 0,223879993 | 3,047486999 | 1,757372561 | 5,176952685 | 11 |
| ENSGALG00000000117 |          | 0,040480999 | 0,220063553 | 0,353819011 | 0,526729322 | 11 |
| ENSGALG00000000464 |          | 34,05612158 | 42,48913859 | 44,95313416 | 70,7967403  | 11 |
| ENSGALG00000000544 | RAB44    | 0,061671392 | 0,998421135 | 3,862756333 | 17,67716506 | 11 |
| ENSGALG00000000935 |          | 5,314625544 | 7,277338245 | 8,425064177 | 13,7096056  | 11 |
| ENSGALG00000001163 | NDEL1    | 8,521796698 | 10,78416631 | 12,97721211 | 15,40550268 | 11 |
| ENSGALG00000001189 | NCF1     | 1,08189946  | 3,436075078 | 4,646876547 | 9,23946829  | 11 |
| ENSGALG00000001281 |          | 0,846894805 | 2,258112365 | 2,370684136 | 5,949678488 | 11 |
| ENSGALG00000001617 | CAMKK1   | 2,604019637 | 7,289324417 | 5,664646749 | 25,44035569 | 11 |
| ENSGALG00000001728 | NACC2    | 11,80186684 | 15,10233978 | 18,75610144 | 27,14939763 | 11 |
| ENSGALG00000002221 |          | 17,07683677 | 20,30245478 | 22,63798635 | 24,90324994 | 11 |

|                    |         |             |             |             |             |    |
|--------------------|---------|-------------|-------------|-------------|-------------|----|
| ENSGALG00000002260 | CISH    | 0,663424147 | 2,139171593 | 2,487720205 | 17,431701   | 11 |
| ENSGALG00000002548 | TLN1    | 20,31627411 | 22,61612195 | 25,81496882 | 28,39885397 | 11 |
| ENSGALG00000002583 | PIK3CD  | 2,842773013 | 3,679276554 | 4,250538255 | 5,394793108 | 11 |
| ENSGALG00000002651 | ST3GAL2 | 40,21612852 | 57,64615583 | 53,02907343 | 92,8557766  | 11 |
| ENSGALG00000003122 | ZFAND2A | 38,01972748 | 57,81426075 | 57,94506614 | 99,08508814 | 11 |
| ENSGALG00000003439 | PLEKHM2 | 48,97856485 | 55,11774842 | 59,44696304 | 66,65072501 | 11 |
| ENSGALG00000003939 |         | 0,73347476  | 1,054393959 | 2,139119382 | 3,112879397 | 11 |
| ENSGALG00000004599 |         | 14,05222685 | 16,58556716 | 26,26019986 | 36,29605918 | 11 |
| ENSGALG00000004626 |         | 160,6674727 | 192,0383383 | 196,9247106 | 241,3004908 | 11 |
| ENSGALG00000004735 |         | 18,71576319 | 24,95209333 | 27,715552   | 47,74079099 | 11 |
| ENSGALG00000005069 |         | 0,925868522 | 2,967476206 | 3,749577092 | 6,294077837 | 11 |
| ENSGALG00000005422 | PDLIM1  | 22,92658872 | 27,45113237 | 32,72226862 | 44,12324064 | 11 |
| ENSGALG00000006008 | HOMER2  | 9,984368442 | 15,75188365 | 20,62165034 | 40,94770081 | 11 |
| ENSGALG00000006407 |         | 11,54087345 | 29,36740869 | 20,30551587 | 48,42948482 | 11 |
| ENSGALG00000006614 |         | 0,081869495 | 0,459517562 | 0,360325202 | 3,561928827 | 11 |
| ENSGALG00000006655 | MAP3K13 | 5,192744917 | 7,000137701 | 8,021460066 | 11,36909123 | 11 |
| ENSGALG00000006947 | BDH1    | 134,1451069 | 150,8578862 | 185,9764126 | 304,1197319 | 11 |
| ENSGALG00000006958 | COL27A1 | 1,237521755 | 2,205820699 | 2,92438058  | 3,742640145 | 11 |
| ENSGALG00000006988 |         | 0,188436541 | 0,498050832 | 0,566069098 | 1,241061957 | 11 |
| ENSGALG00000007238 |         | 7,877525855 | 11,00497278 | 12,15849698 | 17,65303471 | 11 |
| ENSGALG00000007253 | IL1RAP  | 5,654414984 | 5,558750136 | 15,57106007 | 34,03095536 | 11 |
| ENSGALG00000007271 |         | 14,84086276 | 18,48294427 | 21,14237742 | 25,377985   | 11 |
| ENSGALG00000007394 |         | 8,540622935 | 12,18654051 | 12,89609102 | 16,54507416 | 11 |
| ENSGALG00000007415 |         | 0,625774296 | 1,462296833 | 4,567836451 | 9,979634759 | 11 |
| ENSGALG00000007700 | CTTN    | 128,2039185 | 140,4859116 | 150,5105378 | 160,6028241 | 11 |
| ENSGALG00000008143 |         | 54,04131097 | 43,71598201 | 70,22117139 | 96,62123273 | 11 |
| ENSGALG00000008461 |         | 0,10085251  | 0,358449616 | 0,976354066 | 2,087420033 | 11 |
| ENSGALG00000008855 | UGP2    | 111,7329891 | 128,4121345 | 150,4721612 | 177,2730406 | 11 |
| ENSGALG00000008860 | LONRF3  | 13,08961567 | 11,56252738 | 17,86767603 | 27,59267882 | 11 |
| ENSGALG00000008914 | NRAP    | 0,060907983 | 0,269803827 | 0,554252687 | 1,06803981  | 11 |
| ENSGALG00000009298 | TNIK    | 63,46441582 | 78,28507302 | 87,33775935 | 95,12356324 | 11 |
| ENSGALG00000009755 | LRIG3   | 8,560302311 | 9,689196018 | 13,21297799 | 16,14258758 | 11 |
| ENSGALG00000011054 |         | 0,288321762 | 0,262980056 | 0,523082511 | 0,94837143  | 11 |
| ENSGALG00000011435 |         | 39,02276939 | 40,19212106 | 61,11491938 | 81,52693241 | 11 |
| ENSGALG00000011489 |         | 14,63826567 | 23,22066191 | 21,51808684 | 52,80909388 | 11 |
| ENSGALG00000011682 | CNOT4   | 22,61054622 | 27,70663704 | 31,04588956 | 34,4550159  | 11 |
| ENSGALG00000012425 | FERMT2  | 83,37649219 | 100,1967554 | 100,4088724 | 114,1270352 | 11 |
| ENSGALG00000012429 | BMP4    | 17,82855398 | 36,14532957 | 28,25726137 | 99,3060206  | 11 |
| ENSGALG00000012799 | RREB1   | 11,30126957 | 13,32117937 | 15,67245479 | 20,56566068 | 11 |
| ENSGALG00000012956 | TMTC1   | 3,209890424 | 8,381486759 | 5,824287986 | 16,89837709 | 11 |
| ENSGALG00000013971 | SGK1    | 1,199458409 | 4,40482548  | 2,542307669 | 10,62932801 | 11 |
| ENSGALG00000014261 |         | 242,5207982 | 377,9510577 | 322,2554339 | 780,0694354 | 11 |
| ENSGALG00000015351 | CBLB    | 12,07404883 | 15,15682028 | 17,17091245 | 27,17633895 | 11 |
| ENSGALG00000015764 |         | 44,0304829  | 84,94006302 | 66,45816223 | 168,7490346 | 11 |
| ENSGALG00000015842 | TIAM1   | 20,70041796 | 28,78174708 | 32,87000523 | 38,20472121 | 11 |
| ENSGALG00000015952 |         | 4,032607318 | 5,861909098 | 8,43091945  | 13,8938431  | 11 |
| ENSGALG00000016143 |         | 17,59022168 | 32,08840457 | 37,51357006 | 60,99757206 | 11 |
| ENSGALG00000016245 | BCOR    | 28,64786295 | 33,51699852 | 36,2266639  | 41,65368829 | 11 |
| ENSGALG00000016608 | ADCY3   | 2,853041335 | 6,651742728 | 4,591714727 | 10,19414025 | 11 |
| ENSGALG00000016728 | RP2     | 25,23490471 | 36,91489398 | 30,38401635 | 48,54519915 | 11 |
| ENSGALG00000016782 |         | 0,10442844  | 0,304036925 | 0,846006738 | 3,678282371 | 11 |
| ENSGALG00000017053 | SPG20   | 11,56761385 | 17,96862498 | 16,31923789 | 24,44057475 | 11 |
| ENSGALG00000023768 |         | 12,58827437 | 14,79960637 | 29,53884984 | 46,46901449 | 11 |
| ENSGALG00000023876 |         | 18,91142705 | 31,12230827 | 30,65086759 | 49,13801227 | 11 |
| ENSGALG00000023950 |         | 16,76930744 | 21,1204594  | 24,25813505 | 28,37848226 | 11 |
| ENSGALG00000024094 | UBAP2L  | 121,4816481 | 122,1153283 | 148,8144652 | 174,3988709 | 11 |
| ENSGALG00000024346 |         | 7,457246685 | 8,304577678 | 12,23979195 | 18,63106951 | 11 |
| ENSGALG00000024357 |         | 4,028752212 | 4,219547662 | 5,072418923 | 7,277278899 | 11 |
| ENSGALG00000026998 |         | 3,550274189 | 4,733865265 | 5,160014923 | 6,176494911 | 11 |
| ENSGALG00000027168 |         | 0,136502676 | 0,267739429 | 0,637942204 | 1,071922405 | 11 |
| ENSGALG00000027218 |         | 0,155738515 | 0,513268647 | 2,446272203 | 7,015905066 | 11 |
| ENSGALG00000027275 |         | 0,679644543 | 3,953449831 | 4,492768067 | 7,153248591 | 11 |

|                    |                |             |             |             |             |    |
|--------------------|----------------|-------------|-------------|-------------|-------------|----|
| ENSGALG00000028130 |                | 1,446421878 | 5,232635436 | 4,495461427 | 10,72481048 | 11 |
| ENSGALG00000028318 | CDKN1A         | 11,85233268 | 16,60453562 | 17,57147394 | 39,65416547 | 11 |
| ENSGALG00000028326 | HSD11B2        | 17,52552612 | 21,01950351 | 22,5837827  | 24,73250896 | 11 |
| ENSGALG00000028478 |                | 8,846493717 | 10,6899465  | 14,16438457 | 22,92265049 | 11 |
| ENSGALG00000028908 | HOXA6          | 0,080342382 | 0,199969978 | 0,088329259 | 0,326037306 | 11 |
| ENSGALG00000029104 | gga-mir-1732-3 | 0           | 0           | 0           | 0,104480823 | 11 |
| ENSGALG00000000146 | SUPT6H         | 75,73757331 | 73,2737215  | 93,33629554 | 93,02462799 | 12 |
| ENSGALG00000000156 | BRD2           | 395,5412624 | 375,8987072 | 462,9625348 | 448,7455005 | 12 |
| ENSGALG00000000239 |                | 0,126231267 | 0,270426788 | 1,459421001 | 1,749971744 | 12 |
| ENSGALG00000000363 |                | 17,72172408 | 18,08275976 | 21,91750525 | 24,64111121 | 12 |
| ENSGALG00000000452 |                | 13,88409826 | 12,9025315  | 23,92675951 | 31,4506522  | 12 |
| ENSGALG00000000669 | ETV3           | 55,2844349  | 51,98736662 | 82,87935161 | 85,15029012 | 12 |
| ENSGALG00000001076 | LIMK1          | 27,37079683 | 33,09902324 | 41,69368553 | 48,09803052 | 12 |
| ENSGALG00000001108 |                | 36,7691568  | 37,71543648 | 46,04875359 | 44,15642446 | 12 |
| ENSGALG00000001160 |                | 15,70235161 | 23,82939143 | 39,42507425 | 37,6126867  | 12 |
| ENSGALG00000001188 |                | 26,63368303 | 16,27228527 | 87,3108226  | 78,12265485 | 12 |
| ENSGALG00000001258 | NUMA1          | 75,21228323 | 80,47740842 | 88,36224786 | 93,51829499 | 12 |
| ENSGALG00000001434 | STOM           | 1,111021049 | 1,193655921 | 3,310272534 | 3,967409139 | 12 |
| ENSGALG00000001439 | RANBP10        | 20,85370319 | 20,3325829  | 24,978668   | 24,63196551 | 12 |
| ENSGALG00000001629 |                | 0,1320548   | 0,348616407 | 1,058011551 | 1,157701708 | 12 |
| ENSGALG00000001786 |                | 0,066749272 | 0,014283645 | 0,159044053 | 0,214445459 | 12 |
| ENSGALG00000002203 | FGF-18         | 1,02113805  | 2,989854627 | 7,968073498 | 11,18804202 | 12 |
| ENSGALG00000002219 | WBP2           | 14,30140436 | 15,18900359 | 20,5204241  | 18,87317075 | 12 |
| ENSGALG00000002672 |                | 12,23172351 | 13,31637203 | 17,11505231 | 17,08473791 | 12 |
| ENSGALG00000002710 | IPMK           | 25,59409512 | 25,81557827 | 33,58394728 | 37,18293113 | 12 |
| ENSGALG00000002892 |                | 3,768927028 | 3,881473842 | 6,678895746 | 8,225997381 | 12 |
| ENSGALG00000002941 |                | 31,89980035 | 29,96014663 | 38,7163801  | 38,24721579 | 12 |
| ENSGALG00000002955 | ADAMTSL2       | 7,228745086 | 6,663532384 | 13,21950783 | 14,13514694 | 12 |
| ENSGALG00000003329 | GORAB          | 29,21089981 | 30,59281993 | 35,78325922 | 36,27201232 | 12 |
| ENSGALG00000003669 |                | 30,87085295 | 31,84817216 | 37,92728777 | 40,73316328 | 12 |
| ENSGALG00000003770 | ANXA2          | 34,30091985 | 36,59000096 | 49,56068963 | 57,6372842  | 12 |
| ENSGALG00000003774 | ATP13A2        | 32,84399915 | 32,52396046 | 56,0962193  | 53,02322702 | 12 |
| ENSGALG00000003862 |                | 14,85029412 | 13,21434675 | 20,79018931 | 19,72952996 | 12 |
| ENSGALG00000003977 | TWF2           | 111,4566955 | 113,279942  | 130,8659209 | 133,7761085 | 12 |
| ENSGALG00000004002 | LYPLA2         | 150,7495569 | 166,7823137 | 199,4046703 | 212,3326077 | 12 |
| ENSGALG00000004189 | MAFK           | 18,5742469  | 15,59354155 | 38,4494806  | 41,1022777  | 12 |
| ENSGALG00000004209 | ELFN1          | 0,814582164 | 1,927779755 | 2,943360603 | 2,951185081 | 12 |
| ENSGALG00000004365 | WDR66          | 2,811763915 | 2,218322715 | 7,695524749 | 7,52136835  | 12 |
| ENSGALG00000004620 | LAMC1          | 67,46199036 | 66,61106568 | 80,89251769 | 77,47594626 | 12 |
| ENSGALG00000004644 |                | 29,84829422 | 33,04333611 | 40,59987383 | 41,34144336 | 12 |
| ENSGALG00000004853 | LRP3           | 14,18967878 | 14,79468174 | 18,33567747 | 17,50060833 | 12 |
| ENSGALG00000005027 |                | 72,94509595 | 75,84276563 | 86,87569122 | 95,21946926 | 12 |
| ENSGALG00000005095 | SLC25A25       | 35,12452075 | 31,73824572 | 50,94724862 | 51,41349297 | 12 |
| ENSGALG00000005176 |                | 3,413908368 | 6,654325261 | 18,68400718 | 17,79864417 | 12 |
| ENSGALG00000005181 | SEC24C         | 112,2572831 | 109,0976774 | 135,2911855 | 130,1713029 | 12 |
| ENSGALG00000005249 | BICD2          | 41,4406151  | 47,18645604 | 56,32728041 | 59,8048339  | 12 |
| ENSGALG00000005263 | SOX8           | 9,020400549 | 10,58055905 | 34,04858434 | 38,05051596 | 12 |
| ENSGALG00000005397 | GGNBP2         | 38,09740839 | 43,89356976 | 47,73002156 | 49,9842953  | 12 |
| ENSGALG00000005410 |                | 30,14761432 | 40,13307191 | 57,20488775 | 54,56007134 | 12 |
| ENSGALG00000005423 | GRHPR          | 33,87507342 | 41,46612067 | 57,59587439 | 60,8918674  | 12 |
| ENSGALG00000005475 |                | 42,00791977 | 40,17065565 | 51,63447746 | 53,70763465 | 12 |
| ENSGALG00000005505 | PIK3CB         | 5,618150407 | 6,581557383 | 7,805316892 | 8,557807703 | 12 |
| ENSGALG00000005624 |                | 40,16275662 | 42,1965956  | 48,86600313 | 48,24907824 | 12 |
| ENSGALG00000005768 | ETV5           | 17,84320142 | 19,27243279 | 32,56938156 | 36,72354266 | 12 |
| ENSGALG00000006310 |                | 2,754882711 | 5,047741943 | 6,407070844 | 6,761563236 | 12 |
| ENSGALG00000006340 |                | 7,323548685 | 5,786364119 | 11,16780943 | 11,8700516  | 12 |
| ENSGALG00000006372 | RBM33          | 60,01467349 | 56,67563861 | 72,27843028 | 72,37077428 | 12 |
| ENSGALG00000006447 |                | 12,1905467  | 16,08270401 | 60,23850836 | 48,57012952 | 12 |
| ENSGALG00000006757 | XYLT1          | 21,69948906 | 21,78358564 | 28,28419731 | 28,13276454 | 12 |
| ENSGALG00000006855 | MELTF          | 7,135006571 | 6,352915053 | 18,88027596 | 17,81802431 | 12 |
| ENSGALG00000006863 |                | 42,12487657 | 42,61257462 | 56,69086954 | 58,62079625 | 12 |
| ENSGALG00000006919 | POF1B          | 10,72105321 | 9,803658308 | 14,95587342 | 15,84499082 | 12 |



|                    |          |             |             |             |             |    |
|--------------------|----------|-------------|-------------|-------------|-------------|----|
| ENSGALG00000007016 | FAM169B  | 16,76630825 | 19,67869242 | 24,92697293 | 23,82466955 | 12 |
| ENSGALG00000007144 | SIK3     | 2,474106812 | 3,27210838  | 3,763083294 | 4,031320651 | 12 |
| ENSGALG00000007416 | CD3E     | 0,796692068 | 0,963660773 | 2,18018488  | 1,892526906 | 12 |
| ENSGALG00000007512 |          | 62,47306751 | 60,26951594 | 76,45241873 | 83,74261589 | 12 |
| ENSGALG00000007514 |          | 40,05564722 | 43,21170517 | 53,37200909 | 50,85259172 | 12 |
| ENSGALG00000007530 |          | 2,185558313 | 3,093638992 | 7,22955912  | 8,390199431 | 12 |
| ENSGALG00000007669 | EGR1     | 20,96798972 | 15,10254827 | 112,2799795 | 93,85732019 | 12 |
| ENSGALG00000008099 |          | 38,73018399 | 38,99872595 | 49,856415   | 56,42754101 | 12 |
| ENSGALG00000008315 |          | 48,98731667 | 49,55807408 | 61,57033181 | 59,50346104 | 12 |
| ENSGALG00000008369 | ABCC5    | 21,72606872 | 30,01042058 | 54,12213459 | 53,90325716 | 12 |
| ENSGALG00000008403 | PHF21A   | 43,18235274 | 47,88824436 | 51,58618832 | 51,77574719 | 12 |
| ENSGALG00000008676 | RRBP1    | 23,1998561  | 23,99502204 | 31,01580542 | 29,92130683 | 12 |
| ENSGALG00000008856 |          | 1,031931903 | 1,608558804 | 2,634592306 | 3,16631245  | 12 |
| ENSGALG00000008883 | TCF7L2   | 20,496599   | 30,99622973 | 37,62172759 | 37,77014196 | 12 |
| ENSGALG00000009034 |          | 0,801126927 | 0,932946754 | 1,753738946 | 1,779517801 | 12 |
| ENSGALG00000009086 | EHD3     | 146,0272989 | 157,6078485 | 205,2381547 | 195,3390011 | 12 |
| ENSGALG00000009396 |          | 13,79079951 | 19,66608855 | 26,51338215 | 25,68230408 | 12 |
| ENSGALG00000010030 |          | 41,45059966 | 41,25182098 | 57,13689599 | 55,53405584 | 12 |
| ENSGALG00000010166 | VLDLR    | 4,067429632 | 6,335447679 | 9,796757208 | 10,20517655 | 12 |
| ENSGALG00000010291 | RBPMS    | 40,68094996 | 40,8529908  | 75,23070837 | 65,91476169 | 12 |
| ENSGALG00000010385 | TJAP1    | 28,82460773 | 27,21958624 | 36,81273204 | 35,93680702 | 12 |
| ENSGALG00000010778 | CHRM3    | 2,273839966 | 2,32517469  | 6,105235943 | 5,391486719 | 12 |
| ENSGALG00000011025 |          | 11,49510331 | 13,44047249 | 19,03749752 | 17,51789112 | 12 |
| ENSGALG00000011137 |          | 0,621854178 | 0,557885914 | 2,441826917 | 1,948944133 | 12 |
| ENSGALG00000011266 | PPM1K    | 3,953648629 | 4,152677018 | 6,846909686 | 7,380787396 | 12 |
| ENSGALG00000011608 | INF2     | 1,633620915 | 6,49652447  | 13,65966714 | 14,33444624 | 12 |
| ENSGALG00000011944 |          | 29,7277375  | 25,20155428 | 47,10159373 | 48,8566892  | 12 |
| ENSGALG00000012277 |          | 35,33038415 | 33,48644634 | 63,08082454 | 82,91803991 | 12 |
| ENSGALG00000012380 | SPOPL    | 26,64799127 | 26,90568857 | 37,32642684 | 35,31642033 | 12 |
| ENSGALG00000012538 | NR4A2    | 0,505244825 | 0,625081889 | 1,1713555   | 1,07035435  | 12 |
| ENSGALG00000012885 | BCL2     | 12,34404469 | 14,24953187 | 16,80990968 | 17,44414904 | 12 |
| ENSGALG00000013021 |          | 30,98315435 | 33,14000451 | 66,60766145 | 57,42790105 | 12 |
| ENSGALG00000013342 | GBX2     | 104,3637185 | 76,23496549 | 163,838919  | 164,7512996 | 12 |
| ENSGALG00000013628 | C6orf62  | 110,0447131 | 111,9104576 | 145,7924007 | 158,3265634 | 12 |
| ENSGALG00000013757 | TMX3     | 82,04092518 | 84,73616801 | 98,56482332 | 96,04531272 | 12 |
| ENSGALG00000014084 | FGFR1OP2 | 38,22441741 | 44,06957863 | 58,20825246 | 56,45097665 | 12 |
| ENSGALG00000014349 |          | 8,560237913 | 9,973650087 | 16,79967362 | 17,03527571 | 12 |
| ENSGALG00000014355 | STIM2    | 27,91184823 | 26,64561514 | 35,21479281 | 40,31897857 | 12 |
| ENSGALG00000014516 | CPEB2    | 3,813359717 | 7,524646883 | 11,31353119 | 13,35774029 | 12 |
| ENSGALG00000014598 |          | 121,596947  | 119,4705335 | 150,3934093 | 156,4723329 | 12 |
| ENSGALG00000014687 | EPHA1    | 0,875109773 | 0,887791079 | 2,439656862 | 2,902792716 | 12 |
| ENSGALG00000014719 |          | 53,36926679 | 56,13568368 | 75,95786608 | 70,89585202 | 12 |
| ENSGALG00000014815 |          | 7,514303562 | 7,928521182 | 16,27836163 | 14,27131615 | 12 |
| ENSGALG00000014854 |          | 235,2101919 | 242,2048178 | 262,4097502 | 261,6360768 | 12 |
| ENSGALG00000015025 | VANGL1   | 14,75235588 | 14,95356303 | 18,5151432  | 19,32445822 | 12 |
| ENSGALG00000015036 | RIC1     | 24,6564351  | 26,54672688 | 34,77569889 | 32,31957583 | 12 |
| ENSGALG00000015943 |          | 22,32640939 | 23,59775922 | 28,84956292 | 31,67339581 | 12 |
| ENSGALG00000016086 | EGR4     | 0,312754609 | 0,349739454 | 3,626256956 | 2,868130472 | 12 |
| ENSGALG00000016105 | DYSF     | 11,86244012 | 10,67649701 | 17,62292607 | 18,03089    | 12 |
| ENSGALG00000016283 | BEND6    | 8,65472961  | 10,21102149 | 12,41413372 | 13,84260597 | 12 |
| ENSGALG00000016348 | SAT1     | 65,846725   | 146,5356664 | 203,5314021 | 222,2269098 | 12 |
| ENSGALG00000016457 | TRIB2    | 147,3950287 | 132,4539352 | 194,1354664 | 187,1424656 | 12 |
| ENSGALG00000016500 | FKBP12.6 | 12,53712907 | 24,62077173 | 47,98704792 | 47,94808325 | 12 |
| ENSGALG00000016508 |          | 27,46728733 | 30,92244173 | 37,55597573 | 37,58110828 | 12 |
| ENSGALG00000017117 |          | 0,247769645 | 0,503287821 | 1,181898236 | 1,186818356 | 12 |
| ENSGALG00000020719 |          | 0,7762351   | 0,748726958 | 3,053419651 | 2,604518111 | 12 |
| ENSGALG00000021041 |          | 48,79130614 | 47,81392988 | 60,79348483 | 57,94430863 | 12 |
| ENSGALG00000023347 | PTCHD3   | 1,787758741 | 2,844053111 | 5,289343591 | 6,207946544 | 12 |
| ENSGALG00000023468 | VPS9D1   | 20,7533336  | 23,64061043 | 26,5205822  | 26,21200221 | 12 |
| ENSGALG00000023648 | PPP3R1   | 108,4834821 | 119,5709887 | 131,3437155 | 137,8492022 | 12 |
| ENSGALG00000025887 | ATF3     | 6,584528653 | 6,144744457 | 11,98779346 | 16,71462268 | 12 |
| ENSGALG00000025911 |          | 7,173430124 | 8,328187345 | 12,41146067 | 14,53810568 | 12 |

|                    |         |             |             |             |             |    |
|--------------------|---------|-------------|-------------|-------------|-------------|----|
| ENSGALG00000026077 | ALDOC   | 1287,720681 | 1303,453672 | 1587,752058 | 1585,907858 | 12 |
| ENSGALG00000026154 | CARD19  | 2,519303597 | 5,718212359 | 10,62772597 | 11,77837126 | 12 |
| ENSGALG00000026231 | ARID3A  | 55,59951305 | 68,67400855 | 79,54534838 | 84,31937056 | 12 |
| ENSGALG00000026237 |         | 197,6339803 | 214,683724  | 292,3753153 | 315,5343838 | 12 |
| ENSGALG00000026263 | RGS8    | 0,38280482  | 0,973247805 | 10,59393568 | 8,731063711 | 12 |
| ENSGALG00000026355 |         | 2,797729238 | 3,795263667 | 5,576978031 | 6,019303511 | 12 |
| ENSGALG00000026534 |         | 0,434765116 | 0,435780888 | 1,090824905 | 1,486910738 | 12 |
| ENSGALG00000026850 |         | 19,3448547  | 23,33560488 | 26,08136183 | 27,49169005 | 12 |
| ENSGALG00000026989 | HOXA7   | 1,842634302 | 1,750162784 | 3,503069673 | 3,914427    | 12 |
| ENSGALG00000027208 |         | 33,6710471  | 32,97550046 | 43,12346055 | 42,66001317 | 12 |
| ENSGALG00000027331 |         | 1,065988859 | 1,550790838 | 11,17131653 | 17,68458576 | 12 |
| ENSGALG00000027352 |         | 283,8386064 | 243,9179572 | 481,0308996 | 471,5712627 | 12 |
| ENSGALG00000027365 | HIVEP3  | 1,475692748 | 1,810205476 | 5,644935787 | 4,967885552 | 12 |
| ENSGALG00000027554 |         | 0,179438786 | 0,053342062 | 1,868827591 | 2,239675166 | 12 |
| ENSGALG00000027684 |         | 17,74702399 | 21,59636073 | 35,22185222 | 45,64200281 | 12 |
| ENSGALG00000027761 | TNFAIP8 | 5,255419926 | 6,047134406 | 7,671477467 | 7,823425868 | 12 |
| ENSGALG00000027805 |         | 3,22591528  | 3,316534643 | 8,789132761 | 9,027754662 | 12 |
| ENSGALG00000027925 |         | 2,246110271 | 1,656033894 | 2,090585784 | 2,40260606  | 12 |
| ENSGALG00000028095 |         | 116,6593576 | 116,1033043 | 153,7263599 | 150,47256   | 12 |
| ENSGALG00000028128 |         | 48,54899189 | 31,62799235 | 69,21356455 | 93,53834461 | 12 |
| ENSGALG00000028203 | SPRED1  | 21,61093344 | 21,70393773 | 28,89856099 | 28,51271586 | 12 |
| ENSGALG00000028726 |         | 128,7914409 | 85,78500371 | 167,5124021 | 189,4637389 | 12 |
| ENSGALG00000028749 |         | 2923,755457 | 3158,474332 | 3440,767081 | 3520,806683 | 12 |
| ENSGALG00000028759 | LYPD6B  | 3,251758824 | 4,924290781 | 7,287330896 | 9,009994746 | 12 |
| ENSGALG00000028785 |         | 0,606392138 | 1,210251308 | 2,188601903 | 2,472445717 | 12 |
| ENSGALG00000029090 |         | 169,0725833 | 156,4931705 | 386,9724027 | 460,4292989 | 12 |
