# Supplementary material for: HOXB8 Counteracts MAPK/ERK Oncogenic Signaling in a Chicken Embryo Model of Neoplasia
Source: Int J Mol Sci. 2021 Aug 18;22(16):8911. doi: 10.3390/ijms22168911 (PMC8396257; doi:10.3390/ijms22168911)
Supplement: Supplementary file 1 [file ijms-22-08911-s001.zip]

Archive with 6 entries (6 files):
- ijms-1277141 SUPPLEMENTARY FIGURES.pdf
- ijms-1277141 Table S1.pdf
- ijms-1277141 Table S2.pdf
- ijms-1277141 Table S3.pdf
- ijms-1277141 Table S4.pdf
- ijms-1277141 Table S5.pdf
